# Supplementary material
Source: PubMed Central journal article supplement (PMC3065352)

## **Supplemental Data**

### **Analysis of the peroxiredoxin family: using active site structure and sequence information for global classification and residue analysis**

**Kimberly J. Nelson<sup>1</sup>, Stacy T. Knutson<sup>2</sup>, Laura Soito<sup>1</sup>, Chananat Klomsiri<sup>1</sup>,  
Leslie B. Poole<sup>1</sup>, and Jacquelyn S. Fetrow<sup>2\*</sup>**

**Short Title: Active site based analysis of Prx subfamilies**

#### **Supplementary Material Table of Contents**

##### **Supplemental Methods**

DASP algorithm to **utilize functional site profiles to search sequence databases**  
Calculation of mean and standard deviation entropy values for residue conservation

##### **Supplemental Results**

Selection criteria for Prx key residues  
Selection of DASP p-value cutoff  
Profile scores can be used to identify Prx subfamilies  
Engineered profiles can be used to obtain a more specific profile for subfamilies lacking sufficient structural representatives: the BCP/PrxQ example  
DASP identifies three sites of conservation that may be important for Prx catalysis

##### **Supplemental Tables**

Table SI. Prx structures and residues used to create functional site signatures  
Table SII. Prx test protein scores from DASP and PSI-BLAST subfamily searches  
Table SIII. Hits with no Prx motif  
Table SIV. Proteins Assigned by DASP to two Prx subfamilies  
Table SV. Prx subfamily members  
Table SVI. Conserved residues in each Prx subfamily

##### **Supplemental Figures**

Figure S1. Multiple sequence alignment of representative Prxs  
Figure S2. Summary of the DASP process for searching sequence databases  
Figure S3. Results from original vs engineered BCP/PrxQ profile

## Supplemental Methods

### DASP algorithm to utilize functional site profiles to search sequence databases

The steps for utilizing a functional site profile to search protein sequences are summarized in Figure S2 and are described in detail elsewhere<sup>1</sup>. Briefly, profile motifs are identified by traversing the functional site profile from left to right searching for continuous fragments of at least three residues in length that align. These fragments correspond to the fragments identified from the protein structures (indicated by alternating upper and lower case letters in each signature in Figure 2B). A motif is identified at  $i$  if the majority of the sequences in the profile have a fragment or a portion of a fragment between  $i$  and  $j$ , with  $j$  being the position in the profile where the fragment ends. **Not all sequences contain the motif fragment; thus not all sequences may be included in every motif identified in the profile.** Once all motifs in the profile have been identified, individual multiple sequence alignments (MSAs) are created for each motif. A position specific scoring matrix (PSSM) for each motif is created by iterating over the columns of the MSA and tallying the observed counts (the number of occurrences of each residue) and the pseudocounts (based on the overall frequency of the amino acid in the background database) in each column<sup>2</sup>. Counts for each residue in a motif are summed and normalized by the sum of the number of columns in the MSA and the pseudocount weight.

The PSSM for each motif is used to search all sequences of the database using a sliding window procedure<sup>2</sup>. Once a motif from the profile is matched to a position in a protein sequence, a score,  $S_i$ , for the segment of sequence  $s$  beginning at position  $i$  is obtained by summing the corresponding entries from the PSSM, as previously described<sup>3</sup>:

$$S_i = \sum_{j=1}^n m_{s(i+j-1),j}$$

where  $s(x)$  is the letter at position  $x$  in sequence  $s$ ,  $m_{a,x}$  is the score for residue  $a$  at position  $x$  in the PSSM, and  $j$  is the current column of the PSSM. A p-value is then obtained for the score representing the probability of finding a match as good as the observed match in a random spot of a random sequence.

The p-values for all motif matches in a given sequence are combined using QFAST<sup>4</sup>. Briefly, the p-value for each motif is normalized for the length of the motif, and the normalized

p-values from all the motifs are multiplied together to obtain the final product. The p-value for the product represents the statistical significance for the match of each sequence to the entire profile.

### **Calculation of mean and standard deviation entropy values for residue conservation**

The entropy values were calculated as described previously<sup>5</sup> for every residue position across a sequence alignment of 204 peroxiredoxins from all subfamilies. The 204 proteins were selected from PSI-BLAST searches (cutoff score  $e^{-40}$ ) using query sequences *H. sapiens* Prx5 (1hd2), *H. sapiens* Prx6 (1prx), *S. typhimurium* AhpC (1yep), *H. influenza* Tpx (1q98), and *S. pneumoniae* Tpx (1psq). Entropy values were not calculated for any position in the alignment where less than 10 of the sequences had a residue at that position. For all positions in these 204 proteins, the mean entropy value was 1.158, and the standard deviation was 0.548. We thus considered as conserved, those residues with an entropy value lower than 0.61 (the mean minus one standard deviation). Entropy values for each Prx subfamily were calculated using all of the sequences identified by DASP after removing sequences with no Prx motif or hit with a more significant p-value in another subfamily search (Table I, Total after edits).

## **Supplemental Results**

### **Selection criteria for Prx key residues**

Functional site signatures were created for all Prxs with structural coordinates available in the RCSB database as of Jan 2008<sup>6</sup> (Table SI). The first step in creation of signatures is the identification of *key residues*—residues that are known to be important in the activity of a functional site. When the C<sub>P</sub> was used as the only key residue to extract the functional site signature, the protein fragments identified were short and the functional site signatures did not align well. To expand the signatures, other residues were assessed based upon their conservation across known Prxs, including the essentially conserved residues Pro39, Thr43, and Arg119 (numbering for *S. typhimurium* AhpC, Figure 1). Arg119 was present in all of the signatures and inclusion of Arg119 as a key residue did not add to the functional site signatures because the surrounding sequence was not well conserved. The C<sub>R</sub> was also not used as a key residue

because it is not present in all Prxs, is found in different locations in various subfamilies (Figure S1), and is often not located close to the C<sub>P</sub> in the fully folded structures. Initial alignments indicated that all of the Prx signatures contained either a Trp or a Phe residue that was present in the same location across all of the structures and aligned sequences (Trp81 in *Salmonella typhimurium* AhpC), suggesting that it might be important for the mechanism of this family. Including Trp81 as a key residue in the DASP analysis provided a sequence fragment that was long enough to properly align the conserved Trp, which was determined to be important for subsequent DASP searches of the sequence database. Therefore, final functional site signatures were obtained using the residues equivalent to C<sub>P</sub> (Cys46), Pro39, Thr43, and Trp81 as the key residues.

### **Selection of DASP p-value cutoff**

To determine the appropriate p-value cutoffs for the GenBank(nr) search, functional site profiles were created for each Prx subfamily. DASP was used to search the RCSB PDB database because we know the correct subfamily assignment for all the structurally characterized Prxs, Table SI). At p-values more significant than  $10^{-5}$ , all hits returned were peroxiredoxins. At p-values of  $10^{-4}$ , other proteins that did not include the conserved PxxxTxxC motif were starting to be returned, and at  $10^{-3}$ , the vast majority of the results could not be considered peroxiredoxins. In the case of the searches with Prx5 and Tpx, only members of the Prx5 and Tpx class, respectively were returned, even at p-values as low as  $10^{-3}$ . Searches of the Prx6, AhpC/Prx1, or BCP/PrxQ subfamilies were able to pull up members of the other two classes at p-values between  $10^{-5}$ - $10^{-8}$ . With a p-value cutoff of  $10^{-8}$ , the searches were completely specific for the appropriate subfamily and this value was used for further analysis.

### **Profile scores can be used to identify Prx subfamilies**

A score is calculated for each profile based on the level of conservation in the profile as described previously<sup>8</sup>. Work by Cammer *et al* indicated that functional site profile scores ranged from 0.04 - 1.0 for 193 known protein families<sup>8</sup>. Higher profile scores are correlated with more similarity at the functional site. The Prx5 profile (0.25) exhibits significant scores, indicating clear relationships between these proteins. The Tpx profile score (0.14) indicates significant

diversity within the Tpx proteins of known structure, but clustering shows a clear separation of this subfamily from the others (Figure 2A). A more significant profile score was obtained for the Prx6 profile (0.31) compared to the score for a combined Prx6, AhpC, and Prx1 profile (-0.04), indicating that the Prx6 subfamily is distinct from AhpC/Prx1 based on information at the molecular functional site. This analysis suggests that AhpC and Prx1 might also be distinguished, as scores for AhpC (0.32) and Prx1 (0.16) subfamilies individually are much more significant than scores for the combined AhpC/Prx1 subfamily (0.06). The original BCP/PrxQ profile score (0.18) was low, suggesting that the structural diversity of this subfamily is insufficient to produce a robust profile. It is also possible to use profile scores to determine the family/subfamily assignment of a protein; a significant decrease in the profile score upon the addition of a signature suggests that the protein has been misassigned<sup>8</sup>. Addition of the AhpE or BCP functional site signatures to any of the other Prx subfamilies dramatically decreased the score for the resulting profile, indicating that neither BCP nor AhpE were sufficiently similar to be considered as a member of another subfamily.

**Engineered profiles can be used to obtain a more specific profile for subfamilies lacking sufficient structural representatives: the BCP/PrxQ example.**

The PSSM method utilized by DASP is limited by the diversity of the family or subfamily members used to generate the PSSM as illustrated by analysis of the BCP/PrxQ subfamily. At the time of the original analysis, only two distinct sequences were available for structurally characterized members of the BCP/PrxQ subfamily (*Aeropyrum pernix* BCP, 2a4v and *Saccharomyces cerevisiae* BCP, 2cx4), and the resulting profile was of limited diversity. Clustering of all the functional site signatures identified by the DASP search indicated that these two structures are found in two of the smaller groups identified within this subfamily and are not representative of the subfamily as a whole (Figure S3A). The largest groups (labeled groups 1 and 2 in Figure S3A) did not have a representative in the profile; however, the biochemically characterized subfamily members including *Escherichia coli* BCP<sup>9</sup> and *Populus tremula* x *Populus tremuloides* PrxQ<sup>10</sup> are members of these larger groups. Thus, an engineered profile was developed (as described in Methods) for the BCP/PrxQ subfamily using these biochemically

characterized subfamily members to better represent subfamily diversity and to improve sequence searching.

The results of searching GenBank(nr) with both profiles are shown in Figure S3D and E. The original (less diverse) profile (Figure S3B) identified 810 putative subfamily members, while the engineered (more diverse) profile (Figure S3C) identified 1130 putative subfamily members. We cannot distinguish how much of the increase in the number of putative BCP/PrxQ sequences is due to the deposition of more sequences in the GenBank(nr) database (Jan 2008 and Jan 2009 for the original and engineered profiles, respectively); however, other data also suggest that the engineered profile is more robust and diverse. First, the number of identified sequences with an extremely significant p-value ( $<10^{-20}$ ) is lower in the original profile than the engineered (13% and 38%, respectively; Figure S3 D and E) and the distribution of the remaining scores in the engineered search is more consistent with those of other subfamily searches. Second, the number of sequences identified by more than one subfamily search are fewer in the engineered (10, 0.88%) than the original (25, 3.1%) BCP/PrxQ profile. These results show that the composition of the original, structure-based profile affects the specificity and coverage of the sequences identified by the profile. The creation of engineered profiles can therefore be used to increase the power of the sequence searching technique for subfamilies that have few structural representatives.

### **DASP identifies three sites of conservation that may be important for Prx catalysis.**

Other than the PXXXT/SXXC<sub>P</sub> motif<sup>11</sup> and Arg119<sup>11-13</sup>, our analysis identified only three residues that are highly conserved across all Prx functional site signatures (Figure 2B, highlighted in black). The location of both of these residues in representative Prxs are shown in Figure 4 (residues in pink). The first, the Trp noted earlier during optimization of the signatures, is Trp81 in *S. typhimurium* AhpC. This residue is replaced with a Phe in some Prxs, particularly in the BCP/PrxQ and Tpx subfamilies, where 72% and 98% of the subfamily members contain a Phe, respectively. It has previously been noted that Trp81 is conserved in the AhpC/Prx1 subfamily, and mutation of this residue has been shown to dramatically decrease the activity of some peroxiredoxins. For example, Trp81 has been mutated to Leu in a barley 2-Cys peroxiredoxin<sup>14</sup> and to His and Asp in *Crithidia fasciculata* tryparedoxin peroxidase<sup>15</sup> (both

members of the AhpC/Prx1 subfamily). In both cases, this mutation significantly decreased the activity of the protein (and stability in the case of the His and Asp mutations).

The second residue, Ser71 (AhpC, 1n8j numbering), was observed to be stringently conserved across all Prx structures and most of the signatures (Figure 3). This residue is located between the active site and the A-type interface and is part of a hydrogen bond network with other conserved residues (Figure 4, residues in orange; Figure 3, residues marked with #). Although Ser71 (Figure 4, pink) is conserved across all of the subfamilies except Prx5, the rest of the residues involved in this network differ in each subfamily. The role of this residue has not been explored experimentally.

The third residue, Glu49 (numbering from *S. typhimurium* AhpC, 1n8j), is conserved across the AhpC/Prx1 and Prx6 (Glu50 in *Homo sapiens* Prx6, 1prx) subfamilies (Figure 3B and C) and hydrogen bonds to Arg119 in some of the structures (Figure 4A and B, green). The Glu has been identified as characteristic of the “type 4” Prx subfamily which includes our AhpC/Prx1 and Prx6 subfamilies<sup>16</sup>. Although this Glu is not conserved in the other Prx subfamilies except AhpE, all of the subfamilies contain a residue at this position that is capable of hydrogen bonding to Arg119. In the BCP/PrxQ subfamily, this position (Glu52 in *A. pernix* BCP, 2cx4) is occupied by either a Glu (66%) or a Gln (33.5%). Members of the Tpx subfamily contain a Gln (31%), a Ser (58%) or a Glu (9.5%). In members of the Prx5 subfamily, there is a single residue insertion in this portion of the structure, described as an  $\alpha$ -aneurism<sup>17</sup>; a conserved His is located at the same relative position in the *H. sapiens* Prx5 structure (1hd2, His51, Figure 4D, green) and has similar hydrogen bonding patterns as Glu49 in *S. typhimurium* AhpC (Figure 4B). This His is located one residue after the conserved Glu in sequence alignments (Figure S1) and in the signatures (Figure 2B). These observations suggest that hydrogen bonding is a key feature that this residue plays in all subfamilies and that variations in its pK<sub>a</sub> might be important in the Prx mechanism in some subfamilies. This residue has also been identified in computational electrostatic studies as being a residue that interacts strongly with C<sub>P</sub><sup>18</sup>. Recent analysis of Prx active sites with bound substrate analogues revealed that this residue hydrogen bonds to the stringently conserved Arg and that the residue identity is at least partially responsible for determining the conformation of the conserved Arg<sup>19</sup>.

## Supplemental references

1. Huff RG, Bayram E, Tan H, Knutson ST, Knaggs MH, Richon AB, Santago P, 2nd, Fetrow JS. Chemical and structural diversity in cyclooxygenase protein active sites. *Chem Biodivers* 2005;2(11):1533-52.
2. Gribskov M, McLachlan AD, Eisenberg D. Profile analysis: detection of distantly related proteins. *Proc Natl Acad Sci U S A* 1987;84(13):4355-8.
3. Bailey TL, Gribskov M. Methods and statistics for combining motif match scores. *J Comput Biol* 1998;5(2):211-21.
4. Bailey TL, Gribskov M. Combining evidence using p-values: application to sequence homology searches. *Bioinformatics* 1998;14(1):48-54.
5. Shenkin PS, Farid H, Fetrow JS. Prediction and evaluation of side-chain conformations for protein backbone structures. *Proteins* 1996;26(3):323-52.
6. Berman HM, Westbrook J, Feng Z, Gilliland G, Bhat TN, Weissig H, Shindyalov IN, Bourne PE. The Protein Data Bank. *Nucleic Acids Res* 2000;28(1):235-42.
7. Thompson JD, Higgins DG, Gibson TJ. CLUSTAL W: improving the sensitivity of progressive multiple sequence alignment through sequence weighting, position-specific gap penalties and weight matrix choice. *Nucleic Acids Res* 1994;22(22):4673-80.
8. Cammer SA, Hoffman BT, Speir JA, Canady MA, Nelson MR, Knutson S, Gallina M, Baxter SM, Fetrow JS. Structure-based active site profiles for genome analysis and functional family subclassification. *J Mol Biol* 2003;334(3):387-401.
9. Jeong W, Cha MK, Kim IH. Thioredoxin-dependent hydroperoxide peroxidase activity of bacterioferritin comigratory protein (BCP) as a new member of the thiol-specific antioxidant protein (TSA)/Alkyl hydroperoxide peroxidase C (AhpC) family. *J Biol Chem* 2000;275(4):2924-30.
10. Rouhier N, Gelhaye E, Gualberto JM, Jordy MN, De Fay E, Hirasawa M, Duplessis S, Lemaire SD, Frey P, Martin F and others. Poplar peroxiredoxin Q. A thioredoxin-linked chloroplast antioxidant functional in pathogen defense. *Plant Physiol* 2004;134(3):1027-38.
11. Poole LB. The Catalytic Mechanism of Peroxiredoxins. In: Flohé L, Harris JR, editors. *Peroxiredoxin Systems*. New York: Springer; 2007. p 61-81.
12. Hofmann B, Hecht HJ, Flohe L. Peroxiredoxins. *Biol Chem* 2002;383(3-4):347-64.
13. Wood ZA, Schroder E, Robin Harris J, Poole LB. Structure, mechanism and regulation of peroxiredoxins. *Trends Biochem Sci* 2003;28(1):32-40.
14. Konig J, Lotte K, Plessow R, Brockhinke A, Baier M, Dietz KJ. Reaction mechanism of plant 2-Cys peroxiredoxin. Role of the C terminus and the quaternary structure. *J Biol Chem* 2003;278(27):24409-20.
15. Flohe L, Budde H, Bruns K, Castro H, Clos J, Hofmann B, Kansal-Kalavar S, Krumme D, Menge U, Plank-Schumacher K and others. Tryparedoxin peroxidase of *Leishmania donovani*: molecular cloning, heterologous expression, specificity, and catalytic mechanism. *Arch Biochem Biophys* 2002;397(2):324-35.
16. Copley SD, Novak WR, Babbitt PC. Divergence of function in the thioredoxin fold suprafamily: evidence for evolution of peroxiredoxins from a thioredoxin-like ancestor. *Biochemistry* 2004;43(44):13981-95.
17. Sarma GN, Nickel C, Rahlfs S, Fischer M, Becker K, Karplus PA. Crystal structure of a novel *Plasmodium falciparum* 1-Cys peroxiredoxin. *J Mol Biol* 2005;346(4):1021-34.

18. Salsbury FR, Jr., Knutson ST, Poole LB, Fetrow JS. Functional site profiling and electrostatic analysis of cysteines modifiable to cysteine sulfenic acid. *Protein Sci* 2008;17(2):299-312.
19. Hall A, Parsonage D, Poole LB, Karplus PA. Structural Evidence that Peroxiredoxin Catalytic Power Is Based on Transition-State Stabilization. *J Mol Biol* 2010.
20. Alpey MS, Bond CS, Tetaud E, Fairlamb AH, Hunter WN. The structure of reduced trypanothione peroxidase reveals a decamer and insight into reactivity of 2Cys-peroxiredoxins. *J Mol Biol* 2000;300(4):903-16.
21. Schroder E, Littlechild JA, Lebedev AA, Errington N, Vagin AA, Isupov MN. Crystal structure of decameric 2-Cys peroxiredoxin from human erythrocytes at 1.7 Å resolution. *Structure* 2000;8(6):605-15.
22. Hirotsu S, Abe Y, Okada K, Nagahara N, Hori H, Nishino T, Hakoshima T. Crystal structure of a multifunctional 2-Cys peroxiredoxin heme-binding protein 23 kDa/proliferation-associated gene product. *Proc Natl Acad Sci U S A* 1999;96(22):12333-8.
23. Pineyro MD, Pizarro JC, Lema F, Pritsch O, Cayota A, Bentley GA, Robello C. Crystal structure of the trypanothione peroxidase from the human parasite *Trypanosoma cruzi*. *J Struct Biol* 2005;150(1):11-22.
24. Papinutto E, Windle HJ, Cendron L, Battistutta R, Kelleher D, Zanotti G. Crystal structure of alkyl hydroperoxide-reductase (AhpC) from *Helicobacter pylori*. *Biochim Biophys Acta* 2005;1753(2):240-6.
25. Cao Z, Roszak AW, Gourlay LJ, Lindsay JG, Isaacs NW. Bovine mitochondrial peroxiredoxin III forms a two-ring catenane. *Structure* 2005;13(11):1661-4.
26. Boucher IW, McMillan PJ, Gabrielsen M, Akerman SE, Brannigan JA, Schnick C, Brzozowski AM, Wilkinson AJ, Muller S. Structural and biochemical characterization of a mitochondrial peroxiredoxin from *Plasmodium falciparum*. *Mol Microbiol* 2006;61(4):948-59.
27. Jonsson TJ, Murray MS, Johnson LC, Poole LB, Lowther WT. Structural basis for the retroreduction of inactivated peroxiredoxins by human sulfiredoxin. *Biochemistry* 2005;44(24):8634-42.
28. Vedadi M, Lew J, Artz J, Amani M, Zhao Y, Dong AP, Wasney GA, Gao M, Hills T, Brokx S and others. Genome-scale protein expression and structural biology of *Plasmodium falciparum* and related *Apicomplexan* organisms. *Molecular and Biochemical Parasitology* 2007;151(1):100-110.
29. Parsonage D, Youngblood DS, Sarma GN, Wood ZA, Karplus PA, Poole LB. Analysis of the link between enzymatic activity and oligomeric state in AhpC, a bacterial peroxiredoxin. *Biochemistry* 2005;44(31):10583-92.
30. Wood ZA, Poole LB, Hantgan RR, Karplus PA. Dimers to doughnuts: redox-sensitive oligomerization of 2-cysteine peroxiredoxins. *Biochemistry* 2002;41(17):5493-504.
31. Wood ZA, Poole LB, Karplus PA. Peroxiredoxin evolution and the regulation of hydrogen peroxide signaling. *Science* 2003;300(5619):650-3.
32. Kitano K, Kita A, Hakoshima T, Niimura Y, Miki K. Crystal structure of decameric peroxiredoxin (AhpC) from *Amphibacillus xylanus*. *Proteins* 2005;59(3):644-7.
33. Guimaraes BG, Souchon H, Honore N, Saint-Joanis B, Brosch R, Shepard W, Cole ST, Alzari PM. Structure and mechanism of the alkyl hydroperoxidase AhpC, a key element

- of the *Mycobacterium tuberculosis* defense system against oxidative stress. J Biol Chem 2005;280(27):25735-42.
34. Choi HJ, Kang SW, Yang CH, Rhee SG, Ryu SE. Crystal structure of a novel human peroxidase enzyme at 2.0 Å resolution. Nat Struct Biol 1998;5(5):400-6.
  35. Nakamura T, Yamamoto T, Inoue T, Matsumura H, Kobayashi A, Hagihara Y, Uegaki K, Ataka M, Kai Y, Ishikawa K. Crystal structure of thioredoxin peroxidase from aerobic hyperthermophilic archaeon *Aeropyrum pernix K1*. Proteins 2006;62(3):822-6.
  36. Mizohata E, Sakai H, Fusatomi E, Terada T, Murayama K, Shirouzu M, Yokoyama S. Crystal structure of an archaeal peroxiredoxin from the aerobic hyperthermophilic crenarchaeon *Aeropyrum pernix K1*. J Mol Biol 2005;354(2):317-29.
  37. Declercq JP, Evrard C, Clippe A, Stricht DV, Bernard A, Knoop B. Crystal structure of human peroxiredoxin 5, a novel type of mammalian peroxiredoxin at 1.5 Å resolution. J Mol Biol 2001;311(4):751-9.
  38. Evrard C, Smeets A, Knoop B, Declercq JP. Crystal structure of the C47S mutant of human peroxiredoxin 5. Journal of Chemical Crystallography 2004;34(8):553-558.
  39. Echalié A, Trivelli X, Corbier C, Rouhier N, Walker O, Tsan P, Jacquot JP, Aubry A, Krimm I, Lancelin JM. Crystal structure and solution NMR dynamics of a D (type II) peroxiredoxin glutaredoxin and thioredoxin dependent: a new insight into the peroxiredoxin oligomerism. Biochemistry 2005;44(6):1755-67.
  40. Kim SJ, Woo JR, Hwang YS, Jeong DG, Shin DH, Kim K, Ryu SE. The tetrameric structure of *Haemophilus influenza* hybrid Prx5 reveals interactions between electron donor and acceptor proteins. J Biol Chem 2003;278(12):10790-8.
  41. Choi J, Choi S, Cha MK, Kim IH, Shin W. Crystal structure of *Escherichia coli* thiol peroxidase in the oxidized state: insights into intramolecular disulfide formation and substrate binding in atypical 2-Cys peroxiredoxins. J Biol Chem 2003;278(49):49478-86.
  42. Rho BS, Hung LW, Holton JM, Vigil D, Kim SI, Park MS, Terwilliger TC, Pedelacq JD. Functional and structural characterization of a thiol peroxidase from *Mycobacterium tuberculosis*. J Mol Biol 2006;361(5):850-63.
  43. Stehr M, Hecht HJ, Jäger T, Flohe L, Singh M. Structure of the inactive variant C60S of *Mycobacterium tuberculosis* thiol peroxidase. Acta Crystallogr D Biol Crystallogr 2006;62(Pt 5):563-7.
  44. Choi J, Choi S, Chon JK, Cha MK, Kim IH, Shin W. Crystal structure of the C107S/C112S mutant of yeast nuclear 2-Cys peroxiredoxin. Proteins 2005;61(4):1146-9.
  45. Li S, Peterson NA, Kim MY, Kim CY, Hung LW, Yu M, Lekin T, Segelke BW, Lott JS, Baker EN. Crystal Structure of AhpE from *Mycobacterium tuberculosis*, a 1-Cys peroxiredoxin. J Mol Biol 2005;346(4):1035-46.

## Supplemental Figure Legends

**Figure S1. Multiple sequence alignment of representative Prxs shows alignment of some key residues, and the inconsistent location of C<sub>R</sub>.** Key residues used to create the functional site profiles are starred and the location of residues found in the resulting functional site profiles are labeled with the blue rectangles. The subfamily assignments for each Prx are in parentheses after the protein name. The location of the resolving cysteine (C<sub>R</sub>) for a subfamily is highlighted in green for typical 2-Cys (*Salmonella typhimurium* AhpC, *Trypanosoma cruzi* trypanothione peroxidase), atypical 2-Cys (*Homo sapiens* Prx5, *Mycobacterium tuberculosis* Tpx, *Aeropyrum pernix* BCP), and 1-Cys (*H. sapiens* Prx6, *M. tuberculosis* AhpE) Prxs. Residues conserved across the entire alignment are highlighted in red and residues **identified as conserved in this study** in each subfamily are highlighted in yellow. Sequences were aligned using T-coffee [80] and the figure was created using ESPript [49].

**Figure S2. Summary of the DASP process for searching sequence databases.** Functional site profiles (also called active site profiles) are generated as described in detail elsewhere [7], and all motifs (of at least 3 residues in length) for the profile are identified. For each motif, a multiple sequence alignment is created and a position specific scoring matrix (PSSM) is calculated [2]. For each sequence in the database, the PSSM for each motif is used to find the best match, and a p-value score is calculated for each PSSM (representing the probability of finding a similar match in a random sequence) [3]. The p-values from each motif are normalized and then combined using QFAST [4] to give a final p-value, which represents the overall profile to sequence score (more details of this process are described in **Supplemental Methods** and published elsewhere [1]).

**Figure S3. The first two structurally characterized BCP/PrxQ subfamily members are not representative of the entire subfamily and engineered signatures can be used to create a more robust and specific BCP/PrxQ profile.** (A) The functional site signatures obtained from the Genbank(nr) search for the BCP/PrxQ subfamily members using the engineered profile were clustered in Matlab, a cluster cutoff was identified (blue line in the dendrogram) and the

subfamily was subdivided into eight groups. Structural representatives and biochemically characterized BCP/PrxQ proteins are listed to the right of the group to which they belong. The GenBank(nr) database was searched using **(B)** the original functional site profile developed for *Aeropyrum pernix* (2cx4, 2cx3) and *Saccharomyces cerevisiae* (2a4v) BCP or **(C)** the engineered profile reflecting the functional site sequences of *A. pernix* BCP, *S. cerevisiae* BCP, *Escherichia coli* BCP, *Helicobacter pylori* BCP, and *Poplar denticolas* PrxQ using a p-value cutoff of  $10^{-8}$  as described in Material and Methods. The results from the **(D)** original BCP/PrxQ search and the **(E)** engineered BCP/Prx search were analyzed to determine whether sequences were specific for that subfamily (dark gray bars), found in the AhpC/Prx1 subfamily (white bars) or Prx6 subfamily (hashed bars) with a more significant p-value, or contained no Prx motif (black bars). The p-value distribution for sequences returned from GenBank(nr) using the engineered profile (shown in E) is more representative of the results from other Prx subfamilies than the p-value distribution from a search using the original BCP/PrxQ functional site profile (shown in D).

**Table SI. Prx structures and residues used to create functional site signatures**

| PDB                                                                                     | Name                    | Species                           | Chain | Key Residues           | redox state     | Ref   |
|-----------------------------------------------------------------------------------------|-------------------------|-----------------------------------|-------|------------------------|-----------------|-------|
| <b>AhpC/Prx1 (customarily Typical 2-cys Prxs with both A &amp; B interfaces)</b>        |                         |                                   |       |                        |                 |       |
| 1e2y <sup>1</sup>                                                                       | tryparedoxin peroxidase | <i>Crithidia fasciculata</i>      | B     | P45, T49, C52, W87     | SH              | 20    |
| 1qmv <sup>1</sup>                                                                       | Prx2                    | <i>Homo sapiens</i>               | A     | P44, T48, C51, W86     | SO              | 21    |
| 1qq2 <sup>1</sup>                                                                       | Prx1                    | <i>Rattus norvegicus</i>          | A     | P45, T49, C52, W87     | SS              | 22    |
| 1uul <sup>1</sup>                                                                       | tryparedoxin peroxidase | <i>Trypanosoma cruzi</i>          | A     | P45, T49, C52, W87     | SH              | 23    |
| 1zof <sup>1</sup>                                                                       | AhpC                    | <i>Helicobacter pylori</i>        | A     | P42, T46, C49, W84     | S-S             | 24    |
| 1zye <sup>1</sup>                                                                       | Prx 3                   | <i>Bos taurus</i>                 | A     | P40, T44, C47, W82     | SH              | 25    |
| 2h01 <sup>1,2</sup>                                                                     | thiol peroxidase 1      | <i>Plasmodium yoelli</i>          | A     | P43, T47, C50, W85     | SH              |       |
| 2c0d <sup>1</sup>                                                                       | Mitochondrial 2-Cys Prx | <i>Plasmodium falciparum</i>      | A     | P60, T64, C67, W102    | S-S             | 26    |
| 2pn8 <sup>1,2</sup>                                                                     | Prx4                    | <i>Homo sapiens</i>               | A     | P124, T121, C117, W159 | SH              |       |
| 2rii <sup>1</sup>                                                                       | Prx1 (Complex with Srx) | <i>Homo sapiens</i>               | A     | P45, T49, C52, W87     | SH              | 27    |
| 2h66 <sup>1</sup>                                                                       | 2-Cys                   | <i>Plasmodium vivax</i>           | B     | P43, T47, C50, W85     | SH              | 28    |
| 2i81 <sup>1,2</sup>                                                                     | Prx5                    | <i>Plasmodium vivax</i>           | C     | P43, T47, C50, W85     | SH              |       |
| 1yep <sup>3</sup>                                                                       | AhpC                    | <i>Salmonella typhimurium</i>     | A     | P39, T43, C46, W81     | S-S             | 29,30 |
| 1n8j <sup>3</sup>                                                                       | AhpC                    | <i>Salmonella typhimurium</i>     | A     | P39, T43, C46S, W81    | Ser             | 31    |
| 1we0 <sup>3</sup>                                                                       | AhpC                    | <i>Amphibacillus xylanus</i>      | A     | P40, T44, C47, W82     | S-S             | 32    |
| 2bmx <sup>3</sup>                                                                       | AhpC                    | <i>Mycobacterium tuberculosis</i> | A     | P54, T58, C61, W96     | S-S             | 33    |
| <b>Prx6 (Customarily 1-Cys Prxs with a B-type interface)</b>                            |                         |                                   |       |                        |                 |       |
| 1prx                                                                                    | Prx6                    | <i>Homo sapiens</i>               | A     | P40, T44, C47, W82     | SOH             | 34    |
| 1xcc                                                                                    | 1-Cys Prx               | <i>Plasmodium yoelli</i>          | A     | P40, T44, C47, W82     | SH              | 28    |
| 1x0r                                                                                    | thioredoxin peroxidase  | <i>Aeropyrum pernix</i>           | A     | P43, T47, C50, W85     | SH & S-S        | 35    |
| 2cv4                                                                                    | thioredoxin peroxidase  | <i>Aeropyrum pernix</i>           | A     | P43, T47, C50, W85     | SO <sub>3</sub> | 36    |
| <b>Prx5 (Includes both 1-Cys and atypical 2-Cys Prxs that have an A-type interface)</b> |                         |                                   |       |                        |                 |       |
| 1hd2                                                                                    | Prx5                    | <i>Homo sapiens</i>               | A     | P40, T44, C47, W84     | SH              | 37    |
| 1urm                                                                                    | Prx5                    | <i>Homo sapiens</i>               | A     | P40, T44, C47S, W84    | Ser             | 38    |
| 1tp9                                                                                    | PrxD                    | <i>Populus tremula</i>            | A     | P44, T48, C51, W88     | SH              | 39    |
| 1nm3                                                                                    | PrxV                    | <i>Haemophilus influenzae</i>     | A     | P42, T46, C49, W86     | SH              | 40    |
| 1xiy                                                                                    | pfAOP                   | <i>Plasmodium falciparum</i>      | A     | P52, T56, C59, W97     | SO <sub>3</sub> | 17    |
| <b>Tpx (customarily atypical 2-Cys Prxs with an A-type interface)</b>                   |                         |                                   |       |                        |                 |       |
| 1psq <sup>2</sup>                                                                       | Thiol peroxidase        | <i>Streptococcus pneumoniae</i>   | A     | P51, T55, C58, W91     | SH              |       |
| 1q98 <sup>2</sup>                                                                       | thiol peroxidase        | <i>Haemophilus influenzae</i>     | A     | P52, T56, C59, W92     | S-S             |       |
| 1qxh                                                                                    | thiol peroxidase        | <i>Escherichia coli</i>           | A     | P54, T58, C61, W94     | S-S             | 41    |

|                   |                  |                                   |   |                     |     |    |
|-------------------|------------------|-----------------------------------|---|---------------------|-----|----|
| 1xvq              | Tpx              | <i>Mycobacterium tuberculosis</i> | A | P53, T57, C60, W92  | S-S | 42 |
| 1y25              | Tpx              | <i>Mycobacterium tuberculosis</i> | A | P53, T57, C60S, W92 | Ser | 43 |
| 2yzh <sup>2</sup> | Thiol peroxidase | <i>Aquifex aeolicus</i>           | A | P54, T58, C61, W94  | SH  |    |

**BCP/PrxQ (Includes both atypical 2-Cys and 1-Cys Prxs that are monomeric)**

|                   |     |                                 |   |                         |          |    |
|-------------------|-----|---------------------------------|---|-------------------------|----------|----|
| 2a4v              | BCP | <i>Saccharomyces cerevisiae</i> | A | P100, T104, C107S, W141 | Ser      | 44 |
| 2cx4 <sup>2</sup> | BCP | <i>Aeropyrum pernix</i>         | D | P42, T46, C49, W84      | SH & S-S |    |

**AhpE**

|      |      |                                   |   |                    |     |    |
|------|------|-----------------------------------|---|--------------------|-----|----|
| 1xvw | AhpE | <i>Mycobacterium tuberculosis</i> | A | P38, T42, C45, W80 | SOH | 45 |
| 1xxu | AhpE | <i>Mycobacterium tuberculosis</i> | A | P38, T42, C45, W80 | SH  | 45 |

<sup>1</sup>Used to create Prx1 profile

<sup>2</sup>Not published. Coordinates available in RCSB Protein Database

<sup>3</sup>Used to create AhpC profile





**Table SIII. Hits with no Prx motif**

| Accession number             | Name                                                      | Species                                      | p-value  | Missing Residues                    |
|------------------------------|-----------------------------------------------------------|----------------------------------------------|----------|-------------------------------------|
| <b>BCP/PrxQ (engineered)</b> |                                                           |                                              |          |                                     |
| 125973977                    | Redoxin                                                   | <i>Clostridium thermocellum</i> ATCC 27405   | 2.24E-13 | P replaced with other residue       |
| 196253450                    | Alkyl hydroperoxide reductase/ Thiol specific antioxidant | <i>Clostridium thermocellum</i> DSM 4150     | 1.90E-13 | P replaced with other residue       |
| 82702925                     | Alkyl hydroperoxide reductase/ Thiol specific antioxidant | <i>Nitrosospira multiformis</i> ATCC 25196   | 1.42E-14 | P replaced with other residue       |
| 167755398                    | hypothetical protein CLORAM_00912                         | <i>Clostridium ramosum</i> DSM 1402          | 0.00E+00 | P replaced with other residue       |
| <b>AhpC/Prx1</b>             |                                                           |                                              |          |                                     |
| 46204795                     | Peroxiredoxin                                             | <i>Magnetospirillum magnetotacticum</i> MS-1 | 7.97E-22 | T replaced with other residue       |
| 47193078                     | unnamed protein product                                   | <i>Tetraodon nigroviridis</i>                | 1.73E-13 | P fragment missing                  |
| 118094466                    | similar to natural killer cell enhancing factor isoform 2 | <i>Gallus gallus</i>                         | 3.23E-11 | P fragment missing                  |
| 12718511                     | peroxiredoxin                                             | <i>Platichthys flesus</i>                    | 9.14E-15 | Cp fragment missing                 |
| 158593205                    | Thioredoxin peroxidase 1, putative                        | <i>Brugia malayi</i>                         | 1.09E-12 | P replaced with other residue       |
| 116500579                    | hypothetical protein CC1G_04730                           | <i>Coprinopsis cinerea</i> okayama7#130      | 5.38E-10 | Cp fragment missing                 |
| 110602165                    | Alkyl hydroperoxide reductase/ Thiol specific antioxidant | <i>Geobacter</i> sp. FRC-32                  | 2.15E-11 | Cp fragment missing                 |
| 114688004                    | thioredoxin peroxidase                                    | <i>Pan troglodytes</i>                       | 1.20E-15 | P replaced with other residue       |
| 148697774                    | mCG116719                                                 | <i>Mus musculus</i>                          | 2.32E-16 | P replaced with other residue       |
| 73946795                     | PREDICTED: similar to Peroxiredoxin 2                     | <i>Canis familiaris</i>                      | 7.97E-11 | P replaced with other residue       |
| 147919347                    | putative 2-cysteine peroxiredoxin                         | uncultured methanogenic archaeon RC-1        | 7.09E-09 | P replaced with other residue       |
| <b>Prx6</b>                  |                                                           |                                              |          |                                     |
| 1710079                      | REHY_TORRU Probable 1-Cys peroxiredoxin (Rehydrin)        | <i>Syntrichia ruralis</i>                    | 6.99E-12 | T replaced with other residue       |
| 119871684                    | alkyl hydroperoxide reductase/ Thiol specific antioxidant | <i>Pyrobaculum islandicum</i> DSM 4184       | 9.17E-15 | T replaced with other residue       |
| 163718158                    | alkyl hydroperoxide reductase/ Thiol specific antioxidant | <i>Thermoproteus neutrophilus</i> V24Sta     | 4.19E-14 | T replaced with other residue       |
| 119617928                    | hCG2041492                                                | <i>Homo sapiens</i>                          | 1.93E-16 | T replaced with other residue       |
| <b>Prx5</b>                  |                                                           |                                              |          |                                     |
| 2462742                      | Unknown protein                                           | <i>Arabidopsis thaliana</i>                  | 3.70E-10 | Cp P T replaced with other residues |
| 149391021                    | peroxiredoxin 5                                           | <i>Oryza sativa</i> (indica cultivar-group)  | 2.33E-10 | truncation up to T                  |
| 56182370                     | putative thioredoxin peroxidase 1                         | <i>Saccharum officinarum</i>                 | 1.28E-11 | Cp fragment missing                 |
| 114638297                    | similar to antioxidant enzyme B166 isoform 4              | <i>Pan troglodytes</i>                       | 8.10E-13 | Cp fragment missing                 |
| 115745775                    | similar to peroxiredoxin V protein                        | <i>Strongylocentrotus purpuratus</i>         | 4.55E-11 | Cp fragment missing                 |
| <b>Tpx</b>                   |                                                           |                                              |          |                                     |
| 1103833                      | thiol peroxidase                                          | <i>Escherichia coli</i>                      | 0.00E+00 | Cp replaced with W                  |

**Table SIV. Proteins Assigned by DASP to two Prx subfamilies**

| <b>GenBank<br/>Accession Number</b>                                                                                                                                                                                                                                                                                                                                  | <b>p-value<br/>Prx6</b> | <b>p-value<br/>AhpE</b> | <b>p-value<br/>AhpC/Prx1</b> | <b>p-value<br/>BCP/PrxQ</b> |
|----------------------------------------------------------------------------------------------------------------------------------------------------------------------------------------------------------------------------------------------------------------------------------------------------------------------------------------------------------------------|-------------------------|-------------------------|------------------------------|-----------------------------|
| 110799231                                                                                                                                                                                                                                                                                                                                                            |                         | 8.20E-09                | 8.47E-16                     |                             |
| 19357674                                                                                                                                                                                                                                                                                                                                                             |                         | 2.77E-09                | 0                            |                             |
| 125979671                                                                                                                                                                                                                                                                                                                                                            |                         | 8.88E-09                | 0                            |                             |
| 149179118                                                                                                                                                                                                                                                                                                                                                            |                         | 1.94E-09                | 0                            |                             |
| 16331338                                                                                                                                                                                                                                                                                                                                                             |                         | 1.54E-09                | 0                            |                             |
| 17864676                                                                                                                                                                                                                                                                                                                                                             |                         | 8.40E-09                | 0                            |                             |
| 18309764                                                                                                                                                                                                                                                                                                                                                             |                         | 7.52E-09                | 4.01E-16                     |                             |
| 68551025                                                                                                                                                                                                                                                                                                                                                             |                         | 7.06E-10                | 0                            |                             |
| 91090021                                                                                                                                                                                                                                                                                                                                                             |                         | 8.81E-09                | 3.66E-18                     |                             |
| 91203633                                                                                                                                                                                                                                                                                                                                                             |                         | 7.33E-09                | 5.71E-15                     |                             |
| 149278593                                                                                                                                                                                                                                                                                                                                                            |                         | 2.92E-09                |                              | 1.07E-09                    |
| 149918375                                                                                                                                                                                                                                                                                                                                                            |                         | 2.93E-09                |                              | 1.31E-09                    |
| 150020653                                                                                                                                                                                                                                                                                                                                                            |                         | 8.53E-09                |                              | 8.53E-09                    |
| 123437746                                                                                                                                                                                                                                                                                                                                                            | 3.84E-09                |                         | 5.99E-21                     |                             |
| 123449270                                                                                                                                                                                                                                                                                                                                                            | 9.77E-10                |                         | 2.73E-23                     |                             |
| 123459140                                                                                                                                                                                                                                                                                                                                                            | 1.83E-09                |                         | 7.16E-24                     |                             |
| 123974738                                                                                                                                                                                                                                                                                                                                                            | 1.84E-09                |                         | 4.95E-23                     |                             |
| 146304289                                                                                                                                                                                                                                                                                                                                                            | 0                       |                         | 8.30E-09                     |                             |
| 150400760                                                                                                                                                                                                                                                                                                                                                            | 0                       |                         | 3.71E-09                     |                             |
| 156934873                                                                                                                                                                                                                                                                                                                                                            | 5.00E-09                |                         | 0                            |                             |
| 163781576                                                                                                                                                                                                                                                                                                                                                            | 3.83E-09                |                         | 0                            |                             |
| 50083688                                                                                                                                                                                                                                                                                                                                                             | 9.68E-10                |                         | 0                            |                             |
| 50085223                                                                                                                                                                                                                                                                                                                                                             | 2.76E-09                |                         | 0                            |                             |
| 78223919                                                                                                                                                                                                                                                                                                                                                             | 1.37E-10                |                         | 0                            |                             |
| 90416750                                                                                                                                                                                                                                                                                                                                                             | 3.67E-09                |                         | 0                            |                             |
| 3024730                                                                                                                                                                                                                                                                                                                                                              | 0                       |                         |                              | 3.61E-10                    |
| 13472213                                                                                                                                                                                                                                                                                                                                                             | 0                       |                         |                              | 2.01E-09                    |
| 14286173                                                                                                                                                                                                                                                                                                                                                             | 0                       |                         |                              | 9.37E-09                    |
| 15678187                                                                                                                                                                                                                                                                                                                                                             | 0                       |                         |                              | 2.71E-09                    |
| 10281259                                                                                                                                                                                                                                                                                                                                                             |                         |                         | 0                            | 3.85E-10                    |
| 13186337                                                                                                                                                                                                                                                                                                                                                             |                         |                         | 6.91E-09                     | 3.44E-09                    |
| 163789074                                                                                                                                                                                                                                                                                                                                                            |                         |                         | 0                            | 5.04E-09                    |
| 193627310                                                                                                                                                                                                                                                                                                                                                            |                         |                         | 0                            | 4.10E-09                    |
| <p>Scores highlighted in red were the least significant for a given protein.<br/> Scores shown in black indicate the subfamily assignment for a given protein.<br/> Results from the final BCP/PrxQ profile are shown; the original BCP/PrxQ search identified the same 11 sequences as crosshits with scores from <math>10^{-10}</math> - <math>10^{-9}</math>.</p> |                         |                         |                              |                             |

**Table SV. Prx subfamily members**

Table SV can be downloaded separately as an excel spreadsheet

**Table SVI. Conserved residues in each Prx subfamily<sup>a</sup>**

|                  | <b>Conserved<br/>residues in total<br/>sequence</b> | <b>Conserved<br/>residues in<br/>functional site<br/>profile</b> | <b>% total<br/>sequence<br/>conserved</b> | <b>% conserved<br/>residues in<br/>functional site<br/>profile</b> |
|------------------|-----------------------------------------------------|------------------------------------------------------------------|-------------------------------------------|--------------------------------------------------------------------|
| <b>BCP/PrxQ</b>  | 23                                                  | 12                                                               | 9%                                        | 52%                                                                |
| <b>AhpC/Prx1</b> | 33                                                  | 22                                                               | 12%                                       | 67%                                                                |
| <b>Prx6</b>      | 42                                                  | 20                                                               | 15%                                       | 48%                                                                |
| <b>Prx5</b>      | 46                                                  | 16                                                               | 12%                                       | 35%                                                                |
| <b>Tpx</b>       | 39                                                  | 16                                                               | 20%                                       | 41%                                                                |

<sup>a</sup>The full sequences of all proteins in each subfamily were aligned using ClustalW and the entropy values were calculated for every position that contained at least 20 sequences. Residues were considered conserved with an entropy value less than the mean minus one standard deviation (0.61).

Figure S1

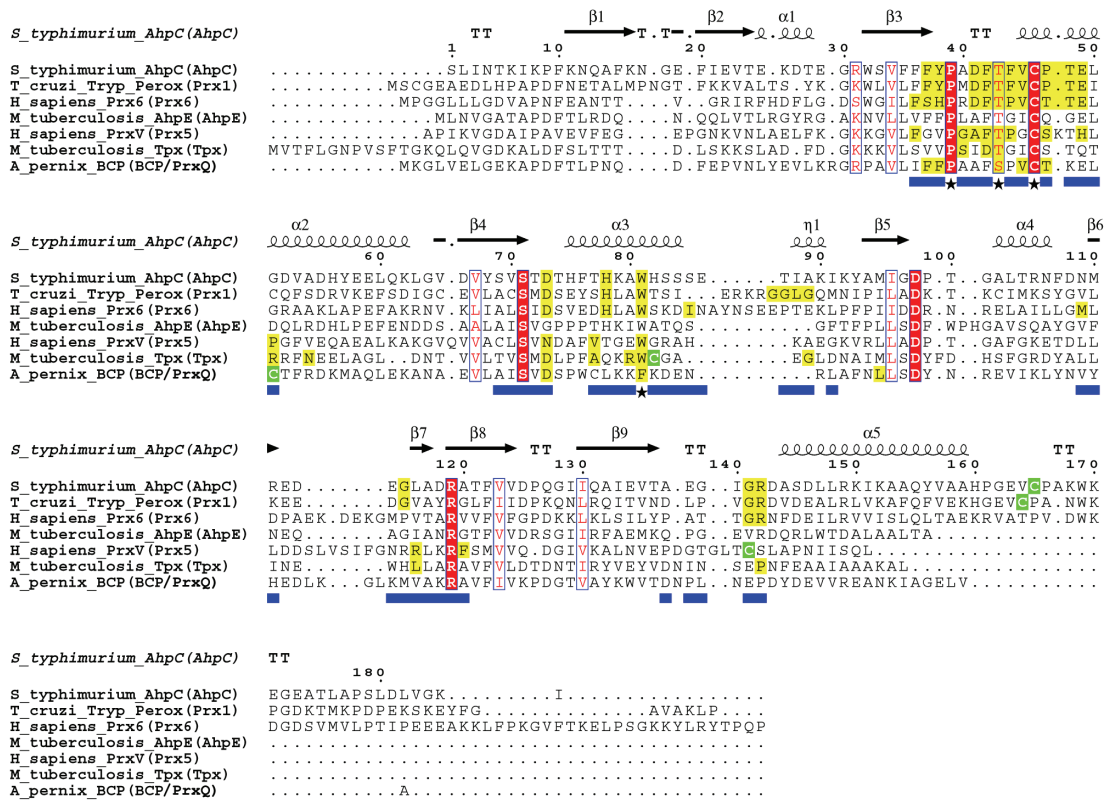

Figure S2

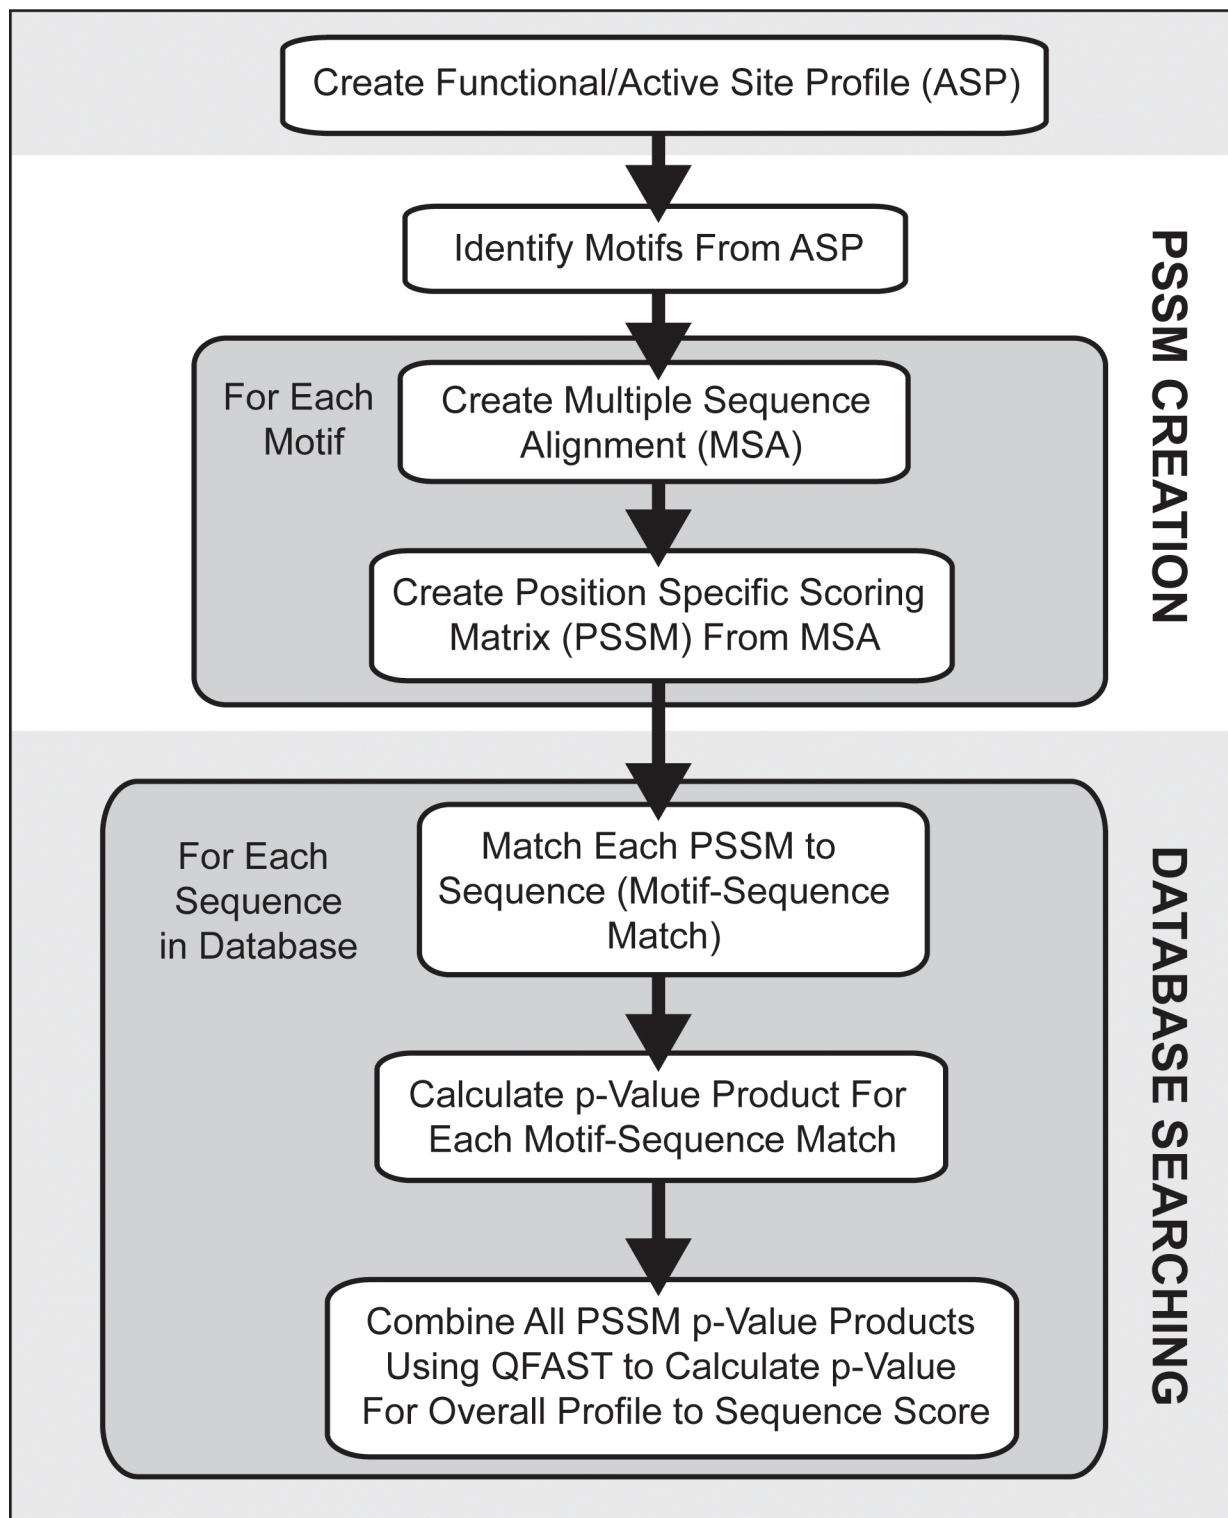

Figure S3

A Dendrogram for BCP subfamily search

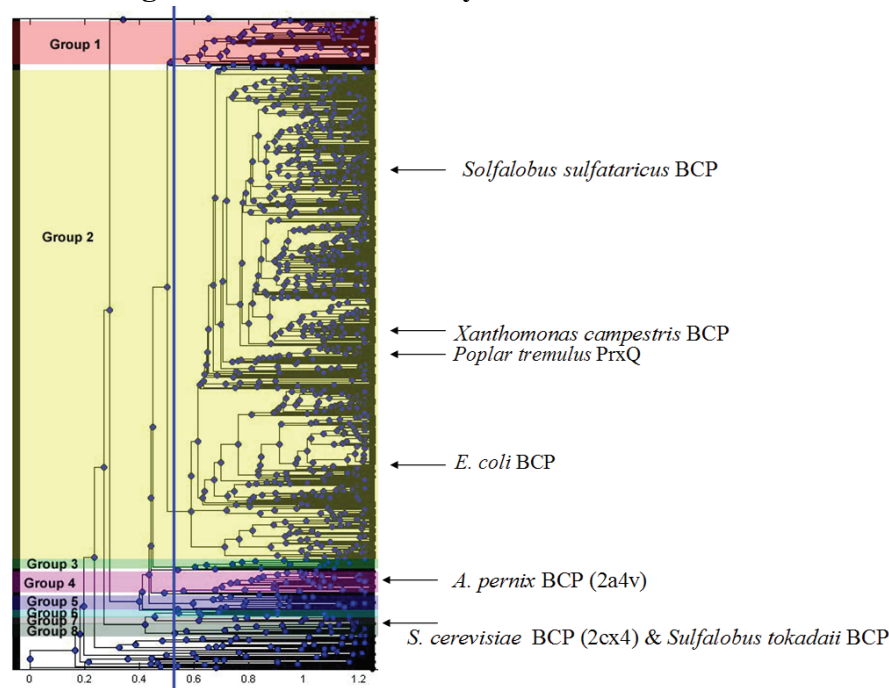

B Active Site Profile for Original BCP/PrxQ subfamily search

|          |                                                        |
|----------|--------------------------------------------------------|
| PDB2A4VA | Efvyprastpgstrqas---GLSADsqkkfqskqnlYl-IaKgsirs-P---   |
| PDB2CX3A | -QffpaafspvctkelctfDmAISVDclkkfk-denLfL-hLlVAKRAnplne  |
| PDB2CX4D | Qiffpaafspvctkelc-----ISVDclkkfk-denrllLvHlLvakra-PLe- |
|          | :* * : * . *: : . : * . * . * : : * : : * : *          |

C Active Site Profile for Engineered BCP/PrxQ subfamily search

|            |                                                        |
|------------|--------------------------------------------------------|
| PDB2A4VA   | Efvyprastpgctrqac---GLSADsqkkfqskqnlYl-IaKgsirs-P---   |
| E. c. BCP  | -QfypkamtpgctvqacglDmGISTDklsrfa-ekelFvKmtGihriFKTSN   |
| PDB2CX3A   | -QffpaafspvctkelctfDmAISVDclkkfk-denLfL-hLlVAKRAnplne  |
| H. p. BCP  | --YFPKDNTPGCTLEAKDFaFavspdSHQKFI-SQC1VlAgYeGIIRsvkakg  |
| PDB2CX4D   | Qiffpaafspvctkelc-----ISVDclkkfk-denrllLvHlLvakra-PLe- |
| P. j. PRXQ | -QfypadetpgctkqacafDyGISGDshkafa-kkyLfL-aFl-PGRQfpep   |
|            | :* : * * * : : * * . * . : * * *                       |

D Results from original BCP/PrxQ profile

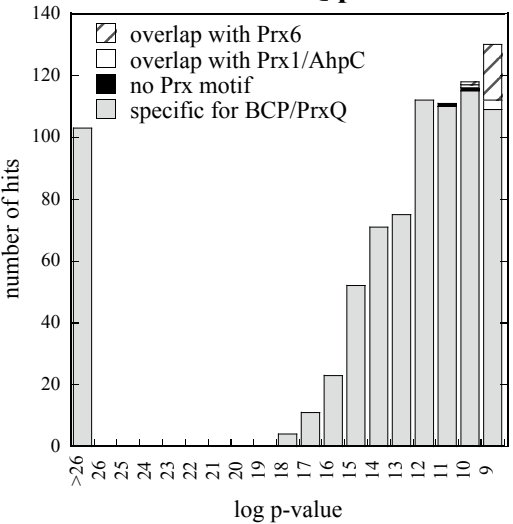

E Results from "engineered" BCP/PrxQ profile

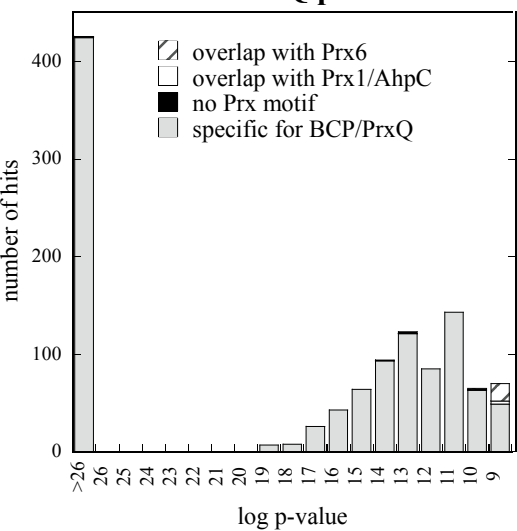

Supplement: NIHMS251533-supplement-Supp_Fig_s1-s3___Table_s1-s4.pdf [file NIHMS251533-supplement-Supp_Fig_s1-s3___Table_s1-s4.pdf]
