# Supplementary material
Source: PubMed Central journal article supplement (PMC3065352)
Supplement: NIHMS251533-supplement-Supp_Table_S6.pdf [file NIHMS251533-supplement-Supp_Table_S6.pdf]

| Hit# | p-value   | gi number  | db  | protein accession | Name                                                                               | Species                                                 | Crosshits [subfamily (p-value)] | Active Site Signature                   |
|------|-----------|------------|-----|-------------------|------------------------------------------------------------------------------------|---------------------------------------------------------|---------------------------------|-----------------------------------------|
| 1    | 6.79E-14  | 121605134  | ref | YP_982463.1       | alkyl hydroperoxide reductase/ Thiol specific antioxidant/ Mal allergen            | <i>Polaromonas naphthalenivorans</i> C.12               |                                 | FFYPKDNTPGCTTEAMGvsrdSHDEFKSKLEvkglrs   |
| 2    | 120594103 | ABM37542.1 | ref | ABM37542.1        | alkyl hydroperoxide reductase/ Thiol specific antioxidant/ Mal allergen            | <i>Polaromonas naphthalenivorans</i> C.2                |                                 | FFYPKDNTPGCTTEAMGvsrdSHDEFKSKLEvkglrs   |
| 3    | 6.23E-15  | 197748012  | ref | YP_002169645.1    | hypothetical protein sq_495                                                        | <i>Aquifex aeolicus</i> VF5                             |                                 | FFYPKDNTPGCTTEAMGvsrdSHDEFKSKLEvkglrs   |
| 4    | 8.30E-11  | 151572839  | gb  | EDN38493.1        | hypothetical protein FTDG_01310                                                    | <i>Francisella tularensis</i> subsp. novicida GA99-3548 |                                 | SLSDFKGGKNNYpkmipgctgsglGISPdydgihri    |
| 5    | 1.80E-12  | 33640732   | emb | CAE21187.1        | Alkyl hydroperoxide reductase/ Thiol specific antioxidant/ Mal allergen            | <i>Loktanella vestfoldensis</i> SKA53                   |                                 | FFYPKDDITPGCTTEAGvsrkdHAKFVAKHDVmgiera  |
| 6    | 0         | 375183338  | sp  | Q75S15.1          | PRXQ_GENTR RecName: Full=Peroxidoredoxin Q, chloroplastic; Atkna peroxidoredoxin Q | <i>Gentiana triflora</i>                                |                                 | FFYPKDDITPGCTTEAGvsrkdHAKFVAKHDVmgiera  |
| 7    | 1.36E-11  | 113868245  | ref | YP_726734.1       | bacterioferritin comigratory protein                                               | <i>Ralstonia eutropha</i> H16                           |                                 | FFYPKDNTPGCTTEAMIsrdsrlsKLKLYGKEHlgkvp  |
| 8    | 2.75E-10  | 55376546   | ref | YP_134398.1       | monooxygenase                                                                      | <i>Haloarcula marismortui</i> ATCC 43049                |                                 | FFYPDFPSPVFNELCavsgdAHRAFAEEYGAvlids    |
| 9    | 9.31E-09  | 49475631   | gb  | AAV44692.1        | monooxygenase                                                                      | <i>Haloarcula marismortui</i> ATCC 43049                |                                 | FFYPKDDITSGTNEALgvvllgikHEKFKIKHAKvsxs  |
| 10   | 1.32E-13  | 62424852   | ref | XP_00379993.1     | Bacterioferritin comigratory protein                                               | <i>Bartonella henselae</i> str. Houston-1               |                                 | FFYPKAAITPGCTTEACGvspsdALQAFITDQOfeqlrs |
| 11   | 0         | 194432150  | ref | XP_03064439.1     | peroxidoredoxin                                                                    | <i>Brevibacterium linens</i> BL.2                       |                                 | FFYPKAITPGCTVQACGvsrkdLSRFKAEKELYdgihri |
| 12   | 2.98E-17  | 196163945  | ref | EDY58906.1        | putative thiol peroxidase (bacterioferritin comigratory protein)                   | <i>Shigella dysenteriae</i> 1012                        |                                 | FFYPKDNTPGCTRQACGvsrkdSHQKFAEKHEIvaikaf |
| 13   | 2.98E-17  | 213955725  | gb  | EE867031.1        | antioxidant. AhpC/TSA family                                                       | <i>Clostridium difficile</i> QCD-23m63                  |                                 | FFYPKAAITPGCTTEAGvsrkdLSRFKAEKELYdgihri |
| 14   | 0         | 85711712   | ref | XP_01042769.1     | bacterioferritin comigratory protein                                               | <i>Protonibacterium acnes</i> SK137                     |                                 | FFYPKAAITPGCTTEAGvsrkdLSRFKAEKELYdgihri |
| 15   | 2.30E-13  | 19778157   | ref | YP_002204357.1    | bacterioferritin comigratory protein                                               | <i>Idiomarina ballica</i> OS145                         |                                 | FFYPKAAITPGCTTEAGvsrkdLSRFKAEKELYdgihri |
| 16   | 7.07E-12  | 196183869  | gb  | EDX78847.1        | bacterioferritin comigratory protein                                               | <i>Streptomyces siveus</i> ATCC 29083                   |                                 | FFYPKDDITGCTREAGvsrkdHDFKAKKYDmgiera    |
| 17   | 1.67E-11  | 169232640  | ref | YP_001689680.1    | peroxidoredoxin-like protein                                                       | <i>Streptomyces siveus</i> ATCC 29083                   |                                 | ALAADNRAlfyrdfrspvcateicGISFPdneatdeya  |
| 18   | 0         | 126694529  | ref | ABO16714.1        | putative bacterioferritin comigratory (BCP) protein                                | <i>Brevimonas</i> sp. BAL.3                             |                                 | FFYPKDNTPGCTKEACGvsrkdSHQKFAEKHEIvaikaf |
| 19   | 1.84E-11  | 71032919   | ref | XP_765751.1       | hypothetical protein                                                               | <i>Halobacterium salinarum</i> R1                       |                                 | LVGKTLsifpsagbdkqacNHAKFKDKGKysktd      |
| 20   | 0         | 59712527   | ref | YP_205303.1       | thioredoxin-dependent thiol peroxidase                                             | <i>Vibrio fischeri</i> ES114                            |                                 | FFYPKAMITPGCTVQACGvsrkdRKGKFIERNVdgihri |
| 21   | 0         | 213014400  | ref | XP_03330357.1     | thiol peroxidase, thioredoxin-dependent                                            | <i>Vibrio fischeri</i> MU11                             |                                 | FFYPKDNTPGCTLEAGvsrkdSHMNF AKKLNlyglrs  |
| 22   | 1.23E-14  | 66824945   | ref | XP_645827.1       | AhpC/TSA family protein                                                            | <i>Thermotogales bacterium</i> TBF_19.5.1               |                                 | KYGNIAPIyppkdnspvcckscGVSsdshshsvksys   |
| 23   | 2.22E-16  | 42830553   | ref | YP_00156092.1     | COG1225: Peroxidoredoxin                                                           | <i>Dicyostelium discoideum</i> AX4                      |                                 | FFYPKALTPGCTTQACGvsrkdLQAFIEKKEYdgihri  |
| 24   | 2.52E-13  | 218259593  | ref | XP_03475283.1     | hypothetical protein PRABACTJOHN_00942                                             | <i>Haemophilus influenzae</i> Pflri                     |                                 | FKGKLAlyppkdnstgataeacGVSkdshrgflakqre  |
| 25   | 2.53E-16  | 145632497  | ref | XP_01788231.1     | exonuclease ABC subunit A                                                          | <i>Haemophilus influenzae</i> 3655                      |                                 | FFYPKALTPGCTTQACGvsrkdLQAFIEKKEYdgihri  |
| 26   | 1.72E-15  | 68535573   | ref | YP_250278.1       | bacterioferritin comigratory protein                                               | <i>Haemophilus influenzae</i> 3655                      |                                 | FFYPKADITPGCTTEACGvsrkdLEKFRDRKYEvglvrs |
| 27   | 3.66E-11  | 83719703   | ref | YP_443382.1       | bcnp, putative                                                                     | <i>Corynebacterium jeikeium</i> K411                    |                                 | FFYPAAAFITGCTIEA-HvsrkdLPAISKANRwaashmq |
| 28   | 0         | 160879714  | ref | YP_00155682.1     | alkyl hydroperoxide reductase/ Thiol specific antioxidant/ Mal allergen            | <i>Burkholderia thailandensis</i> E264                  |                                 | FLGKKVlyppkdnspgataeacGVSkdshshshsvksys |
| 29   | 1.46E-16  | 70607936   | ref | YP_256806.1       | hypothetical protein SacI_2227                                                     | <i>Clostridium phytofermentans</i> ISDg                 |                                 | FFYPKDDITPGCTTEACGvsrkdSHKFKOKYNIparif  |
| 30   | 0         | 124008121  | ref | XP_01692819.1     | bacterioferritin comigratory protein                                               | <i>Sulfolobus acidocaldarius</i> DSM 639                |                                 | FFYPKDFITPGCTTEACGvsrkdTHLKFKEKHNVyskr  |
| 31   | 3.88E-11  | 161524582  | ref | YP_001579594.1    | alkyl hydroperoxide reductase/ Thiol specific antioxidant/ Mal allergen            | <i>Microscilla marina</i> ATCC 23134                    |                                 | FFYPKDNTPGCTTEGLGvsrkdSHDNFKAKLEvlgiers |
| 32   | 8.94E-10  | 189334684  | dbi | BAQ43754.1        | anti-oxidant AhpC/TSA family protein                                               | <i>Burkholderia multivorans</i> ATCC 17616              |                                 | AFYPADFSPVCTSEMRgissrdHQAFAEQLKlgitra   |
| 33   | 1.01E-13  | 121607676  | ref | YP_995783.1       | alkyl hydroperoxide reductase/ Thiol specific antioxidant/ Mal allergen            | <i>Synechococcus</i> sp. JA-2-3B(a)(2:13)               |                                 | FFYPKDNTPGCTTEAMGvsrdSHDDDFKLEKLEvkglrs |

|          |            |     |                |                                                                                                                |                                                   |                                             |
|----------|------------|-----|----------------|----------------------------------------------------------------------------------------------------------------|---------------------------------------------------|---------------------------------------------|
| 34       | 12.1552616 | gb  | ABM56765.1     | alkyl hydroperoxide reductase/ Thiol specific antioxidant/ Mal allergen                                        | Vermineprohacter eisenaiae EF01-2                 | VFYPKAMTPTGCTVQACnleiflkskkvGISPDYjgwt      |
| 0        | 2.1672381  | ref | NP_660448.1    | thioredoxin-dependent thiol peroxidase                                                                         | Buchnera aphidicola                               |                                             |
| 0        | 2.8564216  | sp  | O8274F0.2      | BCP_BUCAP RecName: Full=Putative peroxiredoxin bcp. AINName: Buchnera aphidicola str. Sg.(Schizaphis graminum) |                                                   |                                             |
| 0        | 2.1622987  | gb  | AA067659.1     | bacterioferritin comigratory protein                                                                           | Buchnera aphidicola str. Sg.(Schizaphis graminum) |                                             |
| 2.99E-12 | 162453368  | ref | YP_001617763.1 | bacterioferritin comigratory protein                                                                           | Sorangium cellulosum 'So ce 56'                   | YFYPKDDTTPGCTTREAQgvsrdRHRKFRDKYDvngllrs    |
| 2.68E-12 | 72382566   | emb | CAN91273.1     | bacterioferritin comigratory protein                                                                           | Sorangium cellulosum 'So ce 56'                   |                                             |
| 0        | 2002416    | ref | YP_291921.1    | putative bacterioferritin comigratory protein                                                                  | Prochlorococcus marinus str. NATL2A               | OKGNIRTFYyPKddlpggdlleacGISNGSfglankk       |
| 7.21E-11 | 194090058  | ref | YP_002001106.1 | putative bacterioferritin comigratory protein                                                                  | Neisseria gonorrhoeae NCCP11945                   | SSSGayfypkdstpgctegVVVGISRDklkkykkes        |
| 0        | 152991909  | ref | YP_001357630.1 | Bacterioferritin comigratory protein                                                                           | Neisseria gonorrhoeae NCCP11945                   | YFYPKDNTPTGCTTEACgvsrdKRRNFIEKDKYmgvrs      |
| 0        | 151423770  | tbl | BAF71273.1     | peroxiredoxin family protein                                                                                   | Sulfurovum sp. NBC37-1                            | YFYPKDSTPTGCTNETAgjstsdSHENFKAKLAvnglers    |
| 1.92E-11 | 56478251   | ref | YP_159840.1    | putative peroxiredoxin                                                                                         | Azoarcus sp. EBN1                                 | YFYPKAMTPTGCTVQACgijstskL_SRFSAEKEL_ydghlri |
| 0        | 206578910  | ref | YP_002237182.1 | putative peroxiredoxin                                                                                         | Azoarcus sp. EBN1                                 |                                             |
| 0        | 206564968  | gb  | ACI06744.1     | putative peroxiredoxin                                                                                         | Klebsiella pneumoniae 342                         |                                             |
| 3.20E-12 | 68075121   | ref | XP_679477.1    | merozoit caping protein 1                                                                                      | Klebsiella pneumoniae 342                         | TLKAEIEKNTfypkantpgcteqakGLSADddkllrs       |
| 0        | 163784458  | ref | CA04364.1      | merozoit caping protein 1, putative                                                                            | Plasmodium berghei strain ANKA                    |                                             |
| 0        | 159802273  | gb  | EDP73901.1     | hypothetical protein HG1285_09506                                                                              | Hydrogenivirga sp. 128-5-R1-1                     | YFYPKDNTPTGCTTEACgvsrdSHKFKREKYNvgvirs      |
| 2.01E-16 | 145637148  | ref | YP_01792810.1  | hypothetical protein HG1285_09506                                                                              | Hydrogenivirga sp. 128-5-R1-1                     |                                             |
| 2.39E-13 | 15605946   | ref | NP_213323.1    | bacterioferritin comigratory protein                                                                           | Haemophilus influenzae PIrHH                      | YFYPKALTPGCTTQACgjspkKLAQIEKKE_ydghlri      |
| 0        | 33866694   | ref | NP_888253.1    | bacterioferritin comigratory protein                                                                           | Haemophilus influenzae PIrHH                      | LVLGLAyfypkadtggctqakGISTDkrrfrkfyg         |
| 0        | 33633472   | emb | CAE08677.1     | putative bacterioferritin comigratory (BCP) protein                                                            | Aquifex aeolicus VF5                              | DPAPDF_SyfyPKdtdtggctkeacGISKDShtkfkshke    |
| 1.07E-10 | 121683458  | ref | YP_974793.1    | putative bacterioferritin comigratory (BCP) protein                                                            | Synechococcus sp. WH 8102                         |                                             |
| 0        | 50812202   | ref | YP_054574.1    | hypothetical protein NMC0704                                                                                   | Synechococcus sp. WH 8102                         | AAAVVypkdsjsgctteqVVVGISRDklkkykkes         |
| 0        | 32468719   | emb | CAB12700.2     | hypothetical protein                                                                                           | Neisseria meningitidis FAMT8                      | YFYPKDNTPTGCTTEACgvsrdKHKFKREKHNynglers     |
| 3.22E-12 | 170781115  | ref | YP_001709447.1 | putative peroxidase                                                                                            | Bacillus subtilis subsp. subtilis str. 168        | RFYPAAGTPTGCTTQACgjskcdLARFRFEGG_ygvirs     |
| 0        | 169159683  | emb | CAQ00803.1     | putative peroxidase                                                                                            | Clavibacter michiganensis subsp. sepedonicus      | YFYPKAMTPTGCTVQACgjskcdLARFRFEGG_ygvirs     |
| 0        | 157371748  | ref | YP_001479737.1 | thioredoxin-dependent thiol peroxidase                                                                         | Serratia proteamaculans 568                       | YFYPKAMTPTGCTVQACgjskcdLARFRFEGG_ygvirs     |
| 2.35E-13 | 54729832   | gb  | ABV42609.1     | Peroxiredoxin                                                                                                  | Serratia proteamaculans 568                       | YFYPKADATPGCTTEGOGjlsrdSHQFKSKONvgiers      |
| 0        | 53752617   | emb | CAH14052.1     | hypothetical protein pp2899                                                                                    | Legionella pneumophila str. Paris                 | YFYPKADATPGCTTEGOGjlsrdSHQFKSKONvgiers      |
| 0        | 18548006   | ref | YP_002361877.1 | hypothetical protein                                                                                           | Legionella pneumophila str. Paris                 | YFYPKAMTPTGCTVQACgjskcdLARFRFEGG_ydghlri    |
| 1.89E-13 | 218955627  | emb | CA_Q88238.1    | thiol peroxidase, thioredoxin-dependent                                                                        | Escherichia ferugsonii ATCC 35469                 | YFYPKAMTPTGCTVQACgjskcdLARFRFEGG_ydghlri    |
| 7.85E-14 | 14600438   | ref | NP_146952.1    | peroxiredoxin Q                                                                                                | Escherichia ferugsonii                            | VLSTFKELLYfypmfsgrckkacGISPDkklrirk         |
| 2.32E-13 | 170743973  | ref | YP_001772568.1 | thiol peroxidase                                                                                               | Bacillus cereus AH187                             | YFYPRAMTPTGCTREGYgvsrdKRRFAEKHGegnlra       |
| 0        | 168191817  | gb  | ACA20134.1     | thiol peroxidase                                                                                               | Aeropyrum permix K1                               | YFYPKDDTTSGLTEAKGvsrdSHQFKREKYGVlfdri       |
| 0        | 152967700  | ref | YP_001363484.1 | alkyl hydroperoxide reductase/ Thiol specific antioxidant/ Mal allergen                                        | Methylobacterium sp. 4-46                         | RLSPGyfyPaamtggcttqacVVGISRDklkfaerdg       |
| 1.70E-14 | 191119019  | ref | NP_595117.1    | alkyl hydroperoxide reductase/ Thiol specific antioxidant/ Mal allergen                                        | Methylobacterium sp. 4-46                         | LAAKIANfaypkasjsgctkqacQAKFKDKQONvsrd       |
| 0        | 74676210   | sp  | O94561.1       | PRX_SCHPO RecName: Full=Peroxiredoxin C1773_02; AINName: F1                                                    | Schizosaccharomyces pombe                         |                                             |
| 0        | 3850080    | emb | CAA21907.1     | thioredoxin peroxidase                                                                                         | Schizosaccharomyces pombe                         |                                             |
| 0        | 161344743  | gb  | ABX64442.1     | hypothetical protein                                                                                           | Schizosaccharomyces pombe                         |                                             |
| 0        | 168010694  | ref | XP_001758039.1 | predicted protein                                                                                              | Physcomitrella patens subsp. patens               | YFYPADFTPTCTKQACgvsadLHKQFKARYRypgntly      |
| 0        | 162690916  | gb  | ED077281.1     | predicted protein                                                                                              | Physcomitrella patens subsp. patens               | YFYPAALTPGCTKQACgvsrdKLAQIEKKE_ygvirs       |
| 0        | 197332127  | ref | YP_03174193.1  | bacterioferritin comigratory protein                                                                           | Streptomyces sp. Mq1                              | YFYPAALTPGCTKQACgvsrdKLAQIEKKE_ygvirs       |
| 0        | 197755752  | ref | YP_002179028.1 | bacterioferritin comigratory protein                                                                           | Streptomyces sp. Mq1                              |                                             |
| 0        | 194344608  | gb  | EDX25574.1     | bacterioferritin comigratory protein                                                                           | Streptomyces sp. Mq1                              | LKGGKAFfypkdfjggckkacGISGDSnskfdryk         |
| 0        | 120436706  | ref | YP_862392.1    | bacterioferritin comigratory protein                                                                           | Gramella forsetii KT0803                          |                                             |
| 0        | 117578856  | emb | CAL67325.1     | peroxiredoxin                                                                                                  | Gramella forsetii KT0803                          | YFGISGyfyPKdtdtggctaeisGMSDPdchdkfkkhr      |
| 1.03E-09 | 167361481  | ref | YP_0229604.1   | alkyl hydroperoxide reductase/ Thiol specific antioxidant/ Mal allergen                                        | Rhizobium leguminosarum bv. trifolii WSM1325      | LPGTGGAltsalagqgvFFYPRDDTPGCTKESlgisk       |
| 0        | 167071661  | gb  | EDR75557.1     | bacterioferritin comigratory protein                                                                           | Rhizobium leguminosarum bv. trifolii WSM1325      |                                             |
| 8.86E-09 | 163731389  | ref | YP_02138816.1  | bacterioferritin comigratory protein                                                                           | Roseobacter littoralis Och 149                    | YFYPKDNTPTGCTTEACgjsrdRHKFKREKYGymgiers     |
| 0        | 16394823   | gb  | EDQ19145.1     | bacterioferritin comigratory protein                                                                           | Roseobacter littoralis Och 149                    |                                             |
| 0        | 89100182   | ref | YP_01173050.1  | bacterioferritin comigratory protein                                                                           | Bacillus sp. NRRL B-14911                         | YFYPKDNTPTGCTTEACgjsrdRHKFKREKYGymgiers     |
| 3.95E-16 | 89085148   | gb  | EAR64281.1     | bacterioferritin comigratory protein                                                                           | Bacillus sp. NRRL B-14911                         |                                             |
| 0        | 89462740   | ref | YP_03011525.1  | hypothetical protein BACCOP_03437                                                                              | Bacteroides coprocola DSM 17136                   | YFYPKDNTPTGCTVQACgjskcdLARFRFEGG_ydghlri    |
| 0        | 183993938  | ref | YP_02960891.1  | hypothetical protein BACCOP_03437                                                                              | Bacteroides coprocola DSM 17136                   |                                             |
| 0        | 18021640   | gb  | EDU59680.1     | hypothetical protein PROSTU_02871                                                                              | Providencia stuartii ATCC 25827                   | YFYPKAMTPTGCTVQACgjskcdLARFRFEGG_ydghlri    |
| 2.08E-09 | 86357877   | ref | YP_489769.1    | hypothetical protein PROSTU_02871                                                                              | Providencia stuartii ATCC 25827                   | YFYPKAMTPTGCTVQACgjskcdLARFRFEGG_ydghlri    |
| 0        | 86281979   | gb  | ABC91042.1     | bacterioferritin comigratory protein                                                                           | Rhizobium etli CFN 42                             | YFYPKAMTPTGCTVQACgjskcdLARFRFEGG_ydghlri    |
| 0        | 21398967   | ref | YP_0337812.1   | AtpC/Tsa family protein                                                                                        | Pseudomonas syringae pv. tomato T1                | ELSAFKQQQYfypkntpgctggcGVSRSdygvirs         |
| 7.84E-11 | 21392545   | gb  | EEB59045.1     | AtpC/Tsa family protein                                                                                        | Pseudomonas syringae pv. tomato T1                |                                             |

|     |          |               |                |                                                                         |                                                              |                                           |
|-----|----------|---------------|----------------|-------------------------------------------------------------------------|--------------------------------------------------------------|-------------------------------------------|
| 67  | 0        | 196246037.ref | ZP_03144758.1  | alkyl hydroperoxide reductase/ Thiol specific antioxidant/ Mal allergen | Cyanotheca sp. PCC 8802                                      | CL.TLFSSSFlyfypkdfbtpcgtleakGVSDipaihsa   |
|     |          | 218245971.ref | YP_002371342.1 | alkyl hydroperoxide reductase/ Thiol specific antioxidant/ Mal allergen | Cyanotheca sp. PCC 8801                                      |                                           |
|     |          | 19620811.gb   | EDV0909.1      | alkyl hydroperoxide reductase/ Thiol specific antioxidant/ Mal allergen | Cyanotheca sp. PCC 8802                                      |                                           |
|     |          | 218166449.gb  | ACK665186.1    | alkyl hydroperoxide reductase/ Thiol specific antioxidant/ Mal allergen | Cyanotheca sp. PCC 8801                                      |                                           |
| 68  | 4.39E-14 | 86750119.ref  | YP_486615.1    | alkyl hydroperoxide reductase/ Thiol specific antioxidant/ Mal allergen | Rhodospseudomonas palustris HaA2                             | SLKTPAAKSAfyprrantpgctkealGVSADefqrs      |
|     |          | 66573147.gb   | ABD07704.1     | alkyl hydroperoxide reductase/ Thiol specific antioxidant/ Mal allergen | Rhodospseudomonas palustris HaA2                             |                                           |
| 70  | 1.58E-17 | 67923590.ref  | ZP_00518739.1  | alkyl hydroperoxide reductase/ Thiol specific antioxidant/ Mal allergen | Crocospaera watsoni WH 8501                                  | YFYPKDNITPGCTTTEAGgspisvSHGKFDIKRYDmgjirs |
|     |          | 67852764.gb   | EAM48174.1     | alkyl hydroperoxide reductase/ Thiol specific antioxidant/ Mal allergen | Crocospaera watsoni WH 8501                                  |                                           |
| 71  | 1.12E-12 | 146417823.ref | XP_001484879.1 | hypothetical protein FGUG_02608                                         | Pichia guilliermondii ATCC 6280                              | FAYPKASTPGCTROVcgjssaaQAKNFITKQSpjgkirs   |
| 72  | 4.22E-15 | 124002419.ref | YP_01687272.1  | bacterioferritin comigratory protein                                    | Microscilla marina ATCC 23134                                | YFYPKDNITKGGTAQAAGcvskdSHQKFDIKFEEegiltid |
|     |          | 16976144.gb   | ACR74457.1     | bacterioferritin comigratory protein                                    | Microscilla marina ATCC 23134                                |                                           |
| 73  | 0        | 22299741.ref  | NP_681988.1    | bacterioferritin comigratory protein                                    | Thermosynechococcus elongatus BP-1                           | YFYPKDDITPGCTKEACgvsedSHQKFTAKFNlaodvirs  |
|     |          | 22294922.dbl  | BAC008750.1    | bacterioferritin comigratory protein                                    | Thermosynechococcus elongatus BP-1                           |                                           |
| 74  | 7.71E-11 | 470723138.ref | YP_001750826.1 | alkyl hydroperoxide reductase/ Thiol specific antioxidant/ Mal allergen | Pseudomonas putida W619                                      | YFYPKDSITPGCTTEGGovsrdSHENFNKAKQAkdvtrq   |
|     |          | 16976144.gb   | ACR74457.1     | alkyl hydroperoxide reductase/ Thiol specific antioxidant/ Mal allergen | Pseudomonas putida W619                                      |                                           |
| 75  | 0        | 16081486.ref  | NP_393836.1    | thiol-specific antioxidant related protein                              | Thermoplasma acidophilum DSM 1728                            | NVGDIAFyhpklpbgctteacGVSDshkfaelyln       |
|     |          | 10639529.emb  | CAC11501.1     | thiol-specific antioxidant related protein                              | Thermoplasma acidophilum                                     |                                           |
| 76  | 7.11E-14 | 73662239.ref  | YP_301020.1    | putative peroxiredoxin                                                  | Staphylococcus saprophyticus subsp. saprophyticus ATCC 15305 | YFYPDRNITPTCTTEACgsgidKHQNFSDKLDamgvt     |
|     |          | 72494754.dbl  | BAE18075.1     | putative peroxiredoxin                                                  | Staphylococcus saprophyticus subsp. saprophyticus ATCC 15305 |                                           |
| 77  | 1.25E-14 | 66828545.ref  | XP_647626.1    | AlpC/TSA family protein                                                 | Dicyostelium discoideum AX4                                  | YFYPKDNSPVCTKESCGvssdSHKSFVSKYShkpljag    |
|     |          | 60473614.gb   | EAL73549.1     | AlpC/TSA family protein                                                 | Dicyostelium discoideum AX4                                  |                                           |
| 78  | 3.22E-12 | 149245920.ref | XP_001527430.1 | conserved hypothetical protein                                          | Lodderomyces elongisporus NRRL YB-4233                       | RVA SRSSiSfeypkastpgctqvccGLSADnIkkaeaaet |
|     |          | 146449824.gb  | EDK44080.1     | conserved hypothetical protein                                          | Lodderomyces elongisporus NRRL YB-4233                       |                                           |
| 79  | 1.45E-11 | 67200329.ref  | YP_497586.1    | alkyl hydroperoxide reductase/ Thiol specific antioxidant/ Mal allergen | Novosphingobium aromaticivorans DSM 12444                    | ILSAPASAEELagkpsfYYPKAFQTGGCTLEAHeasad    |
|     |          | 87113801.gb   | ABD26749.1     | alkyl hydroperoxide reductase/ Thiol specific antioxidant/ Mal allergen | Novosphingobium aromaticivorans DSM 12444                    |                                           |
| 80  | 0        | 22128315.ref  | NP_668738.1    | thioredoxin-dependent thiol peroxidase                                  | Yersinia pestis KIM1                                         | YFYPKAMITPGCTVQAAGjstskLSRFAEKELyngfhr    |
|     |          | 45442460.ref  | NP_993999.1    | thioredoxin-dependent thiol peroxidase                                  | Yersinia pestis biovar Microtus str. 91001                   |                                           |
|     |          | 21958193.gb   | AAAM84989.1    | AEO13745.1 bacterioferritin comigratory protein                         | Yersinia pestis KIM                                          |                                           |
| 81  | 8.80E-14 | 211961628.gb  | EEA96823.1     | bacterioferritin comigratory protein                                    | Yersinia pestis biovar Microtus str. 91001                   | YFYPKDDITPGCTKEAlgispdkHDKFKAKHGymoyers   |
| 82  | 0        | 118462347.ref | YP_882361.1    | antioxidant, AlpC/TSA family protein                                    | Pseudovibrio sp. JEO62                                       | FFYPAAITPGCTKEACgavgnvKQAKFAELOKYdid      |
|     |          | 118163634.gb  | ABK64531.1     | antioxidant, AlpC/TSA family protein                                    | Mycobacterium avium 104                                      |                                           |
| 83  | 0        | 212212600.ref | YP_002303536.1 | thioredoxin peroxidase                                                  | Mycobacterium avium 104                                      | LKGGKKVlyhpkkdtpgdkeacGISKDahtqsfkqyn     |
|     |          | 212011010.gb  | ACJ1839.1      | thioredoxin peroxidase                                                  | Coxiella burnetii CbuG_Q212                                  | YFYPKAMITPGCIVQAOAEgvsidrLPNFIEKKSydglnri |
| 84  | 8.85E-13 | 148979871.ref | ZP_01815749.1  | thioredoxin-dependent thiol peroxidase                                  | Vibrionales bacterium SWA1-3                                 |                                           |
|     |          | 145961563.gb  | EDK26864.1     | thioredoxin-dependent thiol peroxidase                                  | Vibrionales bacterium SWA1-3                                 |                                           |
| 85  | 2.36E-13 | 67828190.ref  | XP_661905.1    | hypothetical protein AN4301.2                                           | Aspergillus nidulans FGSC A4                                 | SAKRTRTKVfhytpkaspbgdkqagGLSADkagklll     |
|     |          | 40740985.gb   | EAA60041.1     | hypothetical protein AN4301.2                                           | Aspergillus nidulans FGSC A4                                 |                                           |
| 86  | 2.53E-14 | 66814524.ref  | YP_641444.1    | AlpC/TSA family protein                                                 | KGDKLVSlyfypkdtelsickeacGVSRSDshskfrfskys                    |                                           |
|     |          | 60469465.gb   | EAL67458.1     | AlpC/TSA family protein                                                 | Dicyostelium discoideum AX4                                  |                                           |
| 87  | 8.79E-17 | 145219948.ref | YP_001130657.1 | redoxin domain-containing protein                                       | Prosthecochloris vibriiformis DSM 265                        | OHGKSVSYfypkdfbtpgdtaeacGVSDtkhrrkdaids   |
|     |          | 145208112.gb  | ABP37155.1     | redoxin domain-containing protein                                       | Chlorobium phaeovibrioideus DSM 265                          | YFYPKDNITPGCTSESQjpsdSHKFIQKYHyegjirs     |
| 88  | 1.13E-15 | 57905541.ref  | ZP_00371468.1  | bacterioferritin comigratory protein                                    | Campylobacter upsaliensis RM3795                             | QKGNIRTFyppkddtpgdlevcGINSgshgntnknk      |
|     |          | 57016088.gb   | EAL52875.1     | bacterioferritin comigratory protein                                    | Prochlorococcus marinus str. NATL1A                          |                                           |
| 89  | 1.88E-10 | 124026271.ref | YP_001015387.1 | peroxiredoxin                                                           | Prochlorococcus marinus str. NATL1A                          | QKGNIRTFyppkddtpgdlevcGINSgshgntnknk      |
|     |          | 123961339.gb  | ABM76122.1     | peroxiredoxin                                                           | Prochlorococcus marinus str. NATL1A                          | AFPPGAFTSVCITKEMCgjeavdSLAEFAKQNNlqasks   |
| 90  | 3.31E-13 | 48478320.ref  | YP_024026.1    | putative peroxiredoxin                                                  | Prochlorococcus marinus str. DSM 9790                        |                                           |
|     |          | 48430968.gb   | AA143633.1     | putative peroxiredoxin                                                  | Prochlorococcus marinus str. DSM 9790                        |                                           |
| 91  | 7.80E-10 | 146306692.ref | YP_001187157.1 | alkyl hydroperoxide reductase/ Thiol specific antioxidant/ Mal allergen | Pseudomonas mendocina ymp                                    | YFYPKDAITPGCTTTEGMgvsmdkHESFKCKQIEymgijvs |
|     |          | 145574893.gb  | ABP84425.1     | alkyl hydroperoxide reductase/ Thiol specific antioxidant/ Mal allergen | Pseudomonas mendocina ymp                                    |                                           |
| 92  | 1.82E-09 | 33240382.ref  | NP_875324.1    | peroxiredoxin                                                           | Prochlorococcus marinus subsp. marinus str. CCMP1375         | YFYPEDATSGCTIEAKgskdSHKLF.CSDDQKpngily    |
|     |          | 33237909.gb   | AAP98976.1     | peroxiredoxin                                                           | Prochlorococcus marinus subsp. marinus str. CCMP1375         |                                           |
| 93  | 0        | 157412431.ref | YP_001483297.1 | putative bacterioferritin comigratory (BCP) protein                     | Prochlorococcus marinus str. MIT 9215                        | YFYPKDNITPGCTKEACgjskshQKFIKFKHeghiek     |
|     |          | 157387006.gb  | ABV49711.1     | putative bacterioferritin comigratory (BCP) protein                     | Prochlorococcus marinus str. MIT 9215                        |                                           |
| 94  | 0        | 124026271.ref | YP_001013973.1 | putative bacterioferritin comigratory (BCP) protein                     | Prochlorococcus marinus str. NATL1A                          | YFYPKDDITPGCTKEACgjskshQKFIKFKHkygknel    |
|     |          | 123959925.gb  | ABM74708.1     | putative bacterioferritin comigratory (BCP) protein                     | Prochlorococcus marinus str. NATL1A                          |                                           |
| 95  | 7.48E-11 | 15643152.ref  | NP_228198.1    | bacterioferritin comigratory protein                                    | Thermotoga maritima MSB8                                     | ELLTDfppkagsgcreavVVGISRDaikrfkeind       |
|     |          | 170288830.ref | YP_001738588.1 | nitroreductase                                                          | Thermotoga sp. RQ2                                           |                                           |
|     |          | 4980889.gb    | AA035471.1     | AE001718_8 bacterioferritin comigratory protein/NADH dehydrogenase      | Thermotoga maritima MSB8                                     |                                           |
|     |          | 170175853.gb  | ACG080905.1    | nitroreductase                                                          | Thermotoga sp. RQ2                                           |                                           |
| 96  | 4.86E-15 | 90424345.ref  | YP_532715.1    | alkyl hydroperoxide reductase/ Thiol specific antioxidant/ Mal allergen | Rhodospseudomonas palustris BisB18                           | FFYPRASITPGCTKEAlgsaadAQDAFRDKYQmyqkllq   |
|     |          | 901063395.gb  | AB088396.1     | alkyl hydroperoxide reductase/ Thiol specific antioxidant/ Mal allergen | Rhodospseudomonas palustris BisB18                           |                                           |
| 97  | 4.89E-09 | 187923567.ref | YP_001695209.1 | alkyl hydroperoxide reductase/ Thiol specific antioxidant/ Mal allergen | Burkholderia phytofirmans Ps.JN                              | MKKKFSIVALtasaiyYYPAAFTKGGCTIEAHgvsd      |
|     |          | 187714761.gb  | ACD15985.1     | alkyl hydroperoxide reductase/ Thiol specific antioxidant/ Mal allergen | Burkholderia phytofirmans Ps.JN                              |                                           |
| 98  | 0        | 153855491.ref | ZP_01994871.1  | hypothetical protein DORLON_00860                                       | Dorea longicalena DSM 13814                                  | YFYPKDNITPGCTKQASgvsdSHKFRFEKYGeqjllik    |
|     |          | 149753646.gb  | EDM63577.1     | hypothetical protein DORLON_00860                                       | Dorea longicalena DSM 13814                                  |                                           |
| 99  | 0        | 15644766.ref  | NP_206936.1    | bacterioferritin comigratory protein (bcp)                              | Helicobacter pylori 26695                                    | YFYPKDNITPGCTLEAKgispdSHQKFSQCSNhgirs     |
|     |          | 24994781.sp   | P55979.1       | BCP_HELPY ReclName: Full=Putative peroxiredoxin bcp. AliName: F         | Helicobacter pylori 26695                                    |                                           |
|     |          | 2313221.gb    | AA007205.1     | bacterioferritin comigratory protein (bcp)                              | Helicobacter pylori 26695                                    |                                           |
| 100 | 0        | 123867629.ref | YP_001008487.1 | putative bacterioferritin comigratory (BCP) protein                     | Prochlorococcus marinus str. AS9601                          | YFYPKDNITPGCTKEACgjskshQKFRFEKFNkvaai     |
|     |          | 123197739.gb  | ABM69380.1     | putative bacterioferritin comigratory (BCP) protein                     | Prochlorococcus marinus str. AS9601                          |                                           |

|     |          |               |                |                                                                              |                                                      |                                         |
|-----|----------|---------------|----------------|------------------------------------------------------------------------------|------------------------------------------------------|-----------------------------------------|
| 101 | 0        | 28550433.gb   | AA053197.1     | similar to Anabaena sp. (strain PCC 7120). Bacterioferritin comigratory      | Dicystostelium discoideum                            | SLKDFADKVLvfyppkdstpqcikcaecGVSSDilpgrs |
| 102 | 1.31E-12 | 84684971.ref  | ZP_01012877.1  | probable bacterioferritin                                                    | Rhodobacteriales bacterium HTCC2654                  | TVSLDFlypkastpqcikcaecGVSSDilpgrs       |
| 103 | 0        | 84686732.gb   | EA013782.1     | probable bacterioferritin                                                    | Rhodobacteriales bacterium HTCC2654                  | YFYPKAMTTPGCTVQACglsrskLSRFAEKELydgihri |
|     |          | 51897101.ref  | YP_071292.1    | thioredoxin-dependent thiol peroxidase                                       | Yersinia pseudotuberculosis IP-32953                 | YFYPKAMTTPGCTVQACglsrskLSRFAEKELydgihri |
|     |          | 170023602.ref | YP_001720107.1 | peroxiredoxin                                                                | Yersinia pseudotuberculosis YPIII                    | YFYPKAMTTPGCTVQACglsrskLSRFAEKELydgihri |
|     |          | 186896193.ref | YP_001873305.1 | alkyl hydroperoxide reductase/ Thiol specific antioxidant/ Mal allergen      | Yersinia pseudotuberculosis PB1/+                    | YFYPKAMTTPGCTVQACglsrskLSRFAEKELydgihri |
|     |          | 515903833.gb  | CAH22023.1     | bacterioferritin comigratory protein                                         | Yersinia pseudotuberculosis YPIII                    | YFYPKAMTTPGCTVQACglsrskLSRFAEKELydgihri |
|     |          | 1697501356.gb | ACA617654.1    | peroxiredoxin                                                                | Yersinia pseudotuberculosis YPIII                    | YFYPKAMTTPGCTVQACglsrskLSRFAEKELydgihri |
| 104 | 1.09E-11 | 186899219.gb  | ACC839848.1    | alkyl hydroperoxide reductase/ Thiol specific antioxidant/ Mal allergen      | Yersinia pseudotuberculosis PB1/+                    | YFYPKAMTTPGCTVQACglsrskLSRFAEKELydgihri |
|     |          | 42523292.ref  | NP_968672.1    | bacterioferritin comigratory protein                                         | Bdellovibrio bacteriovorus HD100                     | YFYPKAMTTPGCTVQACglsrskLSRFAEKELydgihri |
|     |          | 39575497.emb  | CAE196665.1    | bacterioferritin comigratory protein                                         | Bdellovibrio bacteriovorus HD100                     | YFYPKAMTTPGCTVQACglsrskLSRFAEKELydgihri |
| 105 | 3.15E-14 | 171914103.ref | ZP_02929573.1  | alkyl hydroperoxide reductase/ Thiol specific antioxidant/ Mal allergen      | Verucomicrobium spinosum DSM 4136                    | YFYPKAMTTPGCTVQACglsrskLSRFAEKELydgihri |
| 106 | 0        | 15920951.ref  | NP_376620.1    | bacterioferritin comigratory protein                                         | Sulfolobus tokodaii str. 7                           | YFYPKAMTTPGCTVQACglsrskLSRFAEKELydgihri |
|     |          | 15621735.dbj  | BA865729.1     | 154aa long hypothetical bacterioferritin comigratory protein                 | Sulfolobus tokodaii str. 7                           | YFYPKAMTTPGCTVQACglsrskLSRFAEKELydgihri |
| 107 | 0        | 56751924.ref  | YP_172825.1    | bacterioferritin comigratory protein                                         | Synechococcus elongatus PCC 6301                     | YFYPKAMTTPGCTVQACglsrskLSRFAEKELydgihri |
|     |          | 81300989.ref  | YP_401197.1    | bacterioferritin comigratory protein                                         | Synechococcus elongatus PCC 6301                     | YFYPKAMTTPGCTVQACglsrskLSRFAEKELydgihri |
|     |          | 56686883.dbj  | BA808105.1     | bacterioferritin comigratory protein                                         | Synechococcus elongatus PCC 6301                     | YFYPKAMTTPGCTVQACglsrskLSRFAEKELydgihri |
| 108 | 1.58E-16 | 145635161.ref | ZP_01790866.1  | exonuclease ABC subunit A                                                    | Synechococcus elongatus PCC 7942                     | YFYPKAMTTPGCTVQACglsrskLSRFAEKELydgihri |
|     |          | 145267582.gb  | EDK07581.1     | exonuclease ABC subunit A                                                    | Haemophilus influenzae PittAA                        | YFYPKAMTTPGCTVQACglsrskLSRFAEKELydgihri |
| 109 | 3.08E-10 | 111223837.ref | YP_714631.1    | thioredoxin-dependent thiol peroxidase; bacterioferritin comigratory protein | Haemophilus influenzae PittAA                        | YFYPKAMTTPGCTVQACglsrskLSRFAEKELydgihri |
|     |          | 111151369.emb | CAJ63084.1     | thioredoxin-dependent thiol peroxidase; bacterioferritin comigratory protein | Frankia alni ACN114a                                 | YFYPKAMTTPGCTVQACglsrskLSRFAEKELydgihri |
| 110 | 2.76E-15 | 116070416.ref | ZP_01467685.1  | putative bacterioferritin comigratory protein                                | Synechococcus sp. BL107                              | YFYPKAMTTPGCTVQACglsrskLSRFAEKELydgihri |
|     |          | 116065821.gb  | EAUJ71578.1    | putative bacterioferritin comigratory protein                                | Synechococcus sp. BL107                              | YFYPKAMTTPGCTVQACglsrskLSRFAEKELydgihri |
| 111 | 6.20E-17 | 52424319.ref  | YP_087456.1    | thioredoxin-dependent thiol peroxidase                                       | Mammheimia succiniciproducens MBEL55E                | YFYPKAMTTPGCTVQACglsrskLSRFAEKELydgihri |
|     |          | 52300371.gb   | AAU36871.1     | Bcp protein                                                                  | Mammheimia succiniciproducens MBEL55E                | YFYPKAMTTPGCTVQACglsrskLSRFAEKELydgihri |
| 112 | 0        | 50955460.ref  | YP_082748.1    | bacterioferritin comigratory-like protein                                    | Leifsonia xyli subsp. xyli str. CTCB07               | YFYPKAMTTPGCTVQACglsrskLSRFAEKELydgihri |
|     |          | 50951942.gb   | AA1789643.1    | bacterioferritin comigratory homolog                                         | Leifsonia xyli subsp. xyli str. CTCB07               | YFYPKAMTTPGCTVQACglsrskLSRFAEKELydgihri |
| 113 | 7.12E-13 | 66824951.ref  | XP_645830.1    | AhpC/TSA family protein                                                      | Dicystostelium discoideum AX4                        | YFYPKAMTTPGCTVQACglsrskLSRFAEKELydgihri |
|     |          | 60474043.gb   | EAL71980.1     | AhpC/TSA family protein                                                      | Dicystostelium discoideum AX4                        | YFYPKAMTTPGCTVQACglsrskLSRFAEKELydgihri |
| 114 | 8.87E-14 | 170076742.ref | YP_001733380.1 | AhpC/TSA family protein                                                      | Synechococcus sp. PCC 7002                           | YFYPKAMTTPGCTVQACglsrskLSRFAEKELydgihri |
|     |          | 169884411.gb  | ACA98124.1     | AhpC/TSA family (bacterioferritin comigratory protein)                       | Synechococcus sp. PCC 7002                           | YFYPKAMTTPGCTVQACglsrskLSRFAEKELydgihri |
| 115 | 2.34E-12 | 170089117.ref | XP_001875781.1 | peroxiredoxin Q                                                              | Synechococcus sp. S238N-H82                          | YFYPKAMTTPGCTVQACglsrskLSRFAEKELydgihri |
|     |          | 164649041.gb  | EDR13283.1     | peroxiredoxin Q                                                              | Synechococcus sp. S238N-H82                          | YFYPKAMTTPGCTVQACglsrskLSRFAEKELydgihri |
| 116 | 0        | 157342483.emb | CA065195.1     | unnamed protein product                                                      | Vitis vinifera                                       | YFYPKAMTTPGCTVQACglsrskLSRFAEKELydgihri |
| 117 | 1.74E-16 | 116323822.ref | YP_768592.1    | peroxiredoxin                                                                | Leptospira borgpetersenii serovar Hardjo-bovis L550  | YFYPKAMTTPGCTVQACglsrskLSRFAEKELydgihri |
|     |          | 116330522.ref | YP_800240.1    | peroxiredoxin                                                                | Leptospira borgpetersenii serovar Hardjo-bovis JB197 | YFYPKAMTTPGCTVQACglsrskLSRFAEKELydgihri |
|     |          | 116121616.gb  | ABJ79659.1     | peroxiredoxin                                                                | Leptospira borgpetersenii serovar Hardjo-bovis L550  | YFYPKAMTTPGCTVQACglsrskLSRFAEKELydgihri |
| 118 | 0        | 108800020.ref | YP_640217.1    | redoxin                                                                      | Leptospira borgpetersenii serovar Hardjo-bovis JB197 | YFYPKAMTTPGCTVQACglsrskLSRFAEKELydgihri |
|     |          | 119669145.ref | YP_939097.1    | redoxin domain-containing protein                                            | Mycobacterium sp. KMS                                | YFYPKAMTTPGCTVQACglsrskLSRFAEKELydgihri |
|     |          | 108770439.gb  | ABG09161.1     | Redoxin                                                                      | Mycobacterium sp. KMS                                | YFYPKAMTTPGCTVQACglsrskLSRFAEKELydgihri |
| 119 | 1.53E-13 | 113953252.ref | YP_730767.1    | bacterioferritin comigratory protein                                         | Mycobacterium sp. KMS                                | YFYPKAMTTPGCTVQACglsrskLSRFAEKELydgihri |
|     |          | 1138800603.gb | ABI45561.1     | bacterioferritin comigratory protein                                         | Synechococcus sp. CC9311                             | YFYPKAMTTPGCTVQACglsrskLSRFAEKELydgihri |
| 120 | 2.51E-09 | 163868346.ref | YP_001609555.1 | bacterioferritin comigratory protein                                         | Synechococcus sp. CC9311                             | YFYPKAMTTPGCTVQACglsrskLSRFAEKELydgihri |
|     |          | 161018002.emb | CAK01560.1     | bacterioferritin comigratory protein                                         | Bartonella tribocorum CIP 105476                     | YFYPKAMTTPGCTVQACglsrskLSRFAEKELydgihri |
| 121 | 8.24E-11 | 5304987.ref   | YP_113177.1    | anti-oxidant AhpC/TSA family protein                                         | Bartonella tribocorum CIP 105476                     | YFYPKAMTTPGCTVQACglsrskLSRFAEKELydgihri |
|     |          | 53758728.gb   | AAU93019.1     | antioxidant. AhpC/Tsa family                                                 | Methylococcus capsulatus str. Bath                   | YFYPKAMTTPGCTVQACglsrskLSRFAEKELydgihri |
| 122 | 5.24E-11 | 78047344.ref  | YP_363519.1    | AhpC/TSA family peroxiredoxin                                                | Methylococcus capsulatus str. Bath                   | YFYPKAMTTPGCTVQACglsrskLSRFAEKELydgihri |
|     |          | 78035774.emb  | CAJ23465.1     | putative AhpC/TSA family peroxiredoxin                                       | Xanthomonas campestris pv. vesicatoria str. 85-10    | YFYPKAMTTPGCTVQACglsrskLSRFAEKELydgihri |
| 123 | 3.00E-11 | 170692302.ref | ZP_02883465.1  | alkyl hydroperoxide reductase/ Thiol specific antioxidant/ Mal allergen      | Xanthomonas campestris pv. vesicatoria str. 85-10    | YFYPKAMTTPGCTVQACglsrskLSRFAEKELydgihri |
|     |          | 170142732.gb  | EDT10897.1     | alkyl hydroperoxide reductase/ Thiol specific antioxidant/ Mal allergen      | Burkholderia graminis C4D1M                          | YFYPKAMTTPGCTVQACglsrskLSRFAEKELydgihri |
| 124 | 4.27E-12 | 124022787.ref | YP_00107094.1  | alkyl hydroperoxide reductase/ Thiol specific antioxidant/ Mal allergen      | Burkholderia graminis C4D1M                          | YFYPKAMTTPGCTVQACglsrskLSRFAEKELydgihri |
|     |          | 123963073.gb  | ABM77829.1     | alkyl hydroperoxide reductase/ Thiol specific antioxidant/ Mal allergen      | Prochlorococcus marinus str. MIT 9303                | YFYPKAMTTPGCTVQACglsrskLSRFAEKELydgihri |
| 125 | 0        | 77977634.ref  | ZP_008330077.1 | peroxiredoxin                                                                | Prochlorococcus marinus str. MIT 9303                | YFYPKAMTTPGCTVQACglsrskLSRFAEKELydgihri |
| 126 | 2.72E-16 | 111018030.ref | YP_701002.1    | bacterioferritin comigratory protein                                         | Yersinia intermedia ATCC 29909                       | YFYPKAMTTPGCTVQACglsrskLSRFAEKELydgihri |
|     |          | 1108175601.gb | ABG92844.1     | bacterioferritin comigratory protein                                         | Rhodococcus jostii RHA1                              | YFYPKAMTTPGCTVQACglsrskLSRFAEKELydgihri |
| 127 | 3.56E-10 | 56697091.ref  | YP_167454.1    | AhpC/TSA family protein                                                      | Rhodococcus jostii RHA1                              | YFYPKAMTTPGCTVQACglsrskLSRFAEKELydgihri |
|     |          | 56678828.gb   | AAV95494.1     | AhpC/TSA family protein                                                      | Silicibacter pomeroyi DSS-3                          | YFYPKAMTTPGCTVQACglsrskLSRFAEKELydgihri |
| 128 | 0        | 111016428.ref | YP_701400.1    | bacterioferritin comigratory protein                                         | Silicibacter pomeroyi DSS-3                          | YFYPKAMTTPGCTVQACglsrskLSRFAEKELydgihri |
|     |          | 110817958.gb  | ABG93242.1     | bacterioferritin comigratory protein                                         | Rhodococcus jostii RHA1                              | YFYPKAMTTPGCTVQACglsrskLSRFAEKELydgihri |
| 129 | 3.35E-12 | 16082618.ref  | NP_394824.1    | peroxiredoxin                                                                | Rhodococcus jostii RHA1                              | YFYPKAMTTPGCTVQACglsrskLSRFAEKELydgihri |
| 130 | 2.04E-11 | 148242483.ref | YP_001227640.1 | peroxiredoxin                                                                | Thermoplasma acidophilum DSM 1728                    | YFYPKAMTTPGCTVQACglsrskLSRFAEKELydgihri |
|     |          | 147850793.emb | CAK28287.1     | peroxiredoxin                                                                | Synechococcus sp. RCC307                             | YFYPKAMTTPGCTVQACglsrskLSRFAEKELydgihri |
| 131 | 0        | 194701728.gb  | ACF84948.1     | unknown                                                                      | Synechococcus sp. RCC307                             | YFYPKAMTTPGCTVQACglsrskLSRFAEKELydgihri |
|     |          | 195636398.gb  | ACG37667.1     | peroxiredoxin bcp                                                            | Zea mays                                             | YFYPKAMTTPGCTVQACglsrskLSRFAEKELydgihri |
| 132 | 0        | 19825752.gb   | EDY82060.1     | antioxidant. AhpC/TSA family                                                 | Zea mays                                             | YFYPKAMTTPGCTVQACglsrskLSRFAEKELydgihri |
| 133 | 4.79E-11 | 33597462.ref  | NP_885105.1    | putative bacterioferritin comigratory protein                                | Verucomicrobiae bacterium DG1235                     | YFYPKAMTTPGCTVQACglsrskLSRFAEKELydgihri |
|     |          | 33573869.emb  | CAE38204.1     | putative bacterioferritin comigratory protein                                | Bordetella parapertussis                             | YFYPKAMTTPGCTVQACglsrskLSRFAEKELydgihri |
| 134 | 1.68E-12 | 190346426.gb  | EDK38510.2     | hypothetical protein PGU6_02608                                              | Pichia guilliermondii ATCC 6260                      | YFYPKAMTTPGCTVQACglsrskLSRFAEKELydgihri |

|     |          |           |     |                |                                                                          |                                           |                                           |
|-----|----------|-----------|-----|----------------|--------------------------------------------------------------------------|-------------------------------------------|-------------------------------------------|
| 135 | 4.33E-13 | 27379435  | ref | NP_770964.1    | bacterioferritin                                                         | Bradyrhizobium japonicum USDA 110         | AAKAKKSKTRfrypradtpgcrealGISADlvgsgkg     |
| 136 | 1.58E-15 | 471914102 | ref | BAC495489.1    | bil4324                                                                  | Bradyrhizobium japonicum USDA 110         | LVAxyDAyypkadtbgtaqaccvGVSTdaqkkfektyn    |
| 137 | 0        | 91793089  | ref | YP_562740.1    | thioredoxin-dependent thiol peroxidase                                   | Yerucromicrobium spinosum DSM 4136        | YFYPKASTPGCTVQACgispqRRLKRFHDKQEVdghrl    |
| 138 | 0        | 91716091  | gb  | ABE55017.1     | alkyl hydroperoxide reductase/ Thiol specific antioxi-dant/ Mai allergen | Shewanella denitrificans OS217            | YFYPKAMTPGCTTQACgispqRRLVKFIEKHIDyeghhv   |
| 139 | 0        | 88798094  | ref | YP_01113688.1  | bacterioferritin comigratory protein                                     | Reinekea sp. MED297                       | YFYPKAMTPGCTVQACgispqRKLRSRFEIEKVEydgihri |
| 140 | 0        | 50120199  | ref | YP_0493666.1   | thioredoxin-dependent thiol peroxidase                                   | Pedobacterium atrosepticum SCR11043       | YFYPKASTPGCTVQACgispqRKLARFAQKQEVdghrl    |
| 141 | 0        | 163752414 | ref | ZP_02159607.1  | bacterioferritin comigratory protein                                     | Pedobacterium atrosepticum SCR11043       | YFYPKDDTTPGCTREAKGsgskdSHENFKKHKHNymgids  |
| 142 | 2.62E-14 | 49610725  | emb | CAG74170.1     | bacterioferritin comigratory protein                                     | Shewanella benthica KT199                 |                                           |
| 143 | 0        | 16132711  | gb  | EDP98900.1     | bacterioferritin comigratory protein                                     | Shewanella benthica KT199                 |                                           |
| 144 | 0        | 57239216  | ref | YP_180352.1    | bacterioferritin comigratory protein                                     | Ehrlichia ruminantium str. Welgevonden    |                                           |
| 145 | 0        | 58579174  | ref | YP_197386.1    | bacterioferritin comigratory protein                                     | Ehrlichia ruminantium str. Welgevonden    |                                           |
| 146 | 0        | 57161235  | emb | CAL458216.1    | putative bacterioferritin comigratory protein                            | Ehrlichia ruminantium str. Welgevonden    |                                           |
| 147 | 0        | 58417800  | emb | CALZ7004.1     | Bacterioferritin comigratory protein                                     | Ehrlichia ruminantium str. Welgevonden    |                                           |
| 148 | 0        | 58040094  | ref | YP_192058.1    | bacterioferritin comigratory protein                                     | Glucobacter oxydans 621H                  | YFYPKADTPGCTTQACgispqRKLKIEKFAIKYGGsgihri |
| 149 | 0        | 58002508  | gb  | AAV61402.1     | Bacterioferritin comigratory protein                                     | Glucobacter oxydans 621H                  |                                           |
| 150 | 0        | 157144587 | ref | YP_001451906.1 | thioredoxin-dependent thiol peroxidase                                   | Citrobacter koseri ATCC BAA-895           | YFYPKAMTPGCTVQACgispqRKLRSRFAEKLydgihri   |
| 151 | 0        | 157081792 | gb  | ABV11470.1     | hypothetical protein CKO_00307                                           | Citrobacter koseri ATCC BAA-895           |                                           |
| 152 | 1.99E-12 | 83952641  | ref | ZP_00961371.1  | hypothetical protein                                                     | Roseovarius nubihhibens ISM               | FFYPRDMTPGCTTEA TgiskdSHDRFVAKKEImglvrs   |
| 153 | 0        | 83835776  | gb  | EAAP75075.1    | AtpC/TSA family protein                                                  | Roseovarius nubihhibens ISM               |                                           |
| 154 | 2.22E-16 | 145628575 | ref | ZP_01784375.1  | excinuclease ABC subunit A                                               | Haemophilus influenzae 22.1-21            | YFYPKALTPGCTTQACgispqRKLQAFIEKKEydgihri   |
| 155 | 0        | 144979045 | gb  | EDJ88731.1     | excinuclease ABC subunit A                                               | Haemophilus influenzae 22.1-21            |                                           |
| 156 | 0        | 116626747 | ref | YP_828903.1    | redoxin domain-containing protein                                        | Solibacter ustulatus Ellim6076            | YFYPKADTPGCTVEACgispqRSLQAKFKKEYDvmgivr   |
| 157 | 0        | 116229909 | gb  | AB_88618.1     | Redoxin domain protein                                                   | Solibacter ustulatus Ellim6076            |                                           |
| 158 | 0        | 15803003  | ref | NP_289033.1    | thioredoxin-dependent thiol peroxidase                                   | Escherichia coli O157:H7 EDL_933          | YFYPKAMTPGCTVQACgispqRKLRSRFAEKLydgihri   |
| 159 | 0        | 15832596  | ref | NP_311369.1    | thioredoxin-dependent thiol peroxidase                                   | Escherichia coli O157:H7 str. Sakai       |                                           |
| 160 | 0        | 16130405  | ref | NP_416975.1    | thiol peroxidase, thioredoxin-dependent                                  | Escherichia coli str. K-12 substr. MG1655 |                                           |
| 161 | 0        | 24113809  | ref | NP_708319.1    | thioredoxin-dependent thiol peroxidase                                   | Shigella flexneri 2a str. 301             |                                           |
| 162 | 0        | 26248850  | ref | NP_754890.1    | thioredoxin-dependent thiol peroxidase                                   | Escherichia coli CF1073                   |                                           |
| 163 | 0        | 30633858  | ref | NP_838029.1    | thioredoxin-dependent thiol peroxidase                                   | Shigella flexneri 2a str. 24571           |                                           |
| 164 | 0        | 74313006  | ref | YP_311425.1    | thioredoxin-dependent thiol peroxidase                                   | Shigella boydii S8046                     |                                           |
| 165 | 0        | 82544928  | ref | YP_408875.1    | thioredoxin-dependent thiol peroxidase                                   | Shigella boydii S8227                     |                                           |
| 166 | 0        | 82777862  | ref | YP_404211.1    | thioredoxin-dependent thiol peroxidase                                   | Shigella dysenteriae Sd197                |                                           |
| 167 | 0        | 89109286  | ref | AP_003066.1    | thiol peroxidase, thioredoxin-dependent                                  | Escherichia coli W3110                    |                                           |
| 168 | 0        | 91211812  | ref | YP_541798.1    | thioredoxin-dependent thiol peroxidase                                   | Escherichia coli UT189                    |                                           |
| 169 | 0        | 110642684 | ref | YP_670384.1    | thioredoxin-dependent thiol peroxidase                                   | Escherichia coli 536                      |                                           |
| 170 | 0        | 110806413 | ref | YP_689933.1    | thioredoxin-dependent thiol peroxidase                                   | Shigella flexneri 5 str. 8401             |                                           |
| 171 | 0        | 117624676 | ref | YP_853589.1    | thioredoxin-dependent thiol peroxidase                                   | Escherichia coli APEC O1                  |                                           |
| 172 | 0        | 157159418 | ref | YP_001463805.1 | thioredoxin-dependent thiol peroxidase                                   | Escherichia coli E24377A                  |                                           |
| 173 | 0        | 157161942 | ref | YP_001459280.1 | thioredoxin-dependent thiol peroxidase                                   | Escherichia coli HS                       |                                           |
| 174 | 0        | 16874843  | ref | ZP_02773488.1  | peroxiredoxin                                                            | Escherichia coli O157:H7 str. EC4113      |                                           |
| 175 | 0        | 168756249 | ref | ZP_02781256.1  | peroxiredoxin                                                            | Escherichia coli O157:H7 str. EC4401      |                                           |
| 176 | 0        | 168761086 | ref | ZP_02786093.1  | peroxiredoxin                                                            | Escherichia coli O157:H7 str. EC4501      |                                           |
| 177 | 0        | 168768569 | ref | ZP_02793576.1  | peroxiredoxin                                                            | Escherichia coli O157:H7 str. EC4486      |                                           |
| 178 | 0        | 168773609 | ref | ZP_027986116.1 | peroxiredoxin                                                            | Escherichia coli O157:H7 str. EC4196      |                                           |
| 179 | 0        | 168778443 | ref | ZP_02803450.1  | peroxiredoxin                                                            | Escherichia coli O157:H7 str. EC4076      |                                           |
| 180 | 0        | 168787823 | ref | ZP_02812830.1  | peroxiredoxin                                                            | Escherichia coli O157:H7 str. EC889       |                                           |
| 181 | 0        | 168798848 | ref | ZP_02823855.1  | peroxiredoxin                                                            | Escherichia coli O157:H7 str. EC508       |                                           |
| 182 | 0        | 170019235 | ref | YP_001724189.1 | peroxiredoxin                                                            | Escherichia coli ATCC 8739                |                                           |
| 183 | 0        | 170082090 | ref | YP_001731410.1 | thiol peroxidase, thioredoxin-dependent                                  | Escherichia coli str. K12 substr. DH10B   |                                           |
| 184 | 0        | 170767462 | ref | ZP_02901915.1  | peroxiredoxin                                                            | Escherichia coli SMS-3-5                  |                                           |
| 185 | 0        | 187733428 | ref | YP_001881272.1 | peroxiredoxin                                                            | Escherichia albertii TW07627              |                                           |
| 186 | 0        | 18849304  | ref | YP_03000311.1  | peroxiredoxin                                                            | Shigella boydii CDC 3083-94               |                                           |
| 187 | 0        | 191167641 | ref | ZP_03029451.1  | peroxiredoxin                                                            | Escherichia coli B7A                      |                                           |
| 188 | 0        | 191172905 | ref | ZP_03034440.1  | peroxiredoxin                                                            | Escherichia coli F11                      |                                           |
| 189 | 0        | 193064683 | ref | ZP_03045771.1  | peroxiredoxin                                                            | Escherichia coli E22                      |                                           |
| 190 | 0        | 193066831 | ref | ZP_03049274.1  | peroxiredoxin                                                            | Escherichia coli E110019                  |                                           |
| 191 | 0        | 194437707 | ref | ZP_03069803.1  | peroxiredoxin                                                            | Escherichia coli 101-1                    |                                           |
| 192 | 0        | 195936623 | ref | ZP_03082005.1  | thioredoxin-dependent thiol peroxidase                                   | Escherichia coli O157:H7 str. EC4024      |                                           |
| 193 | 0        | 208808520 | ref | ZP_03250857.1  | peroxiredoxin                                                            | Escherichia coli O157:H7 str. EC4206      |                                           |
| 194 | 0        | 208814215 | ref | ZP_03255544.1  | peroxiredoxin                                                            | Escherichia coli O157:H7 str. EC4045      |                                           |
| 195 | 0        | 208821885 | ref | ZP_03262205.1  | peroxiredoxin                                                            | Escherichia coli O157:H7 str. EC4042      |                                           |
| 196 | 0        | 20939765  | ref | YP_002271949.1 | peroxiredoxin                                                            | Escherichia coli O157:H7 str. EC4115      |                                           |
| 197 | 0        | 209519955 | ref | YP_002294039.1 | bacterioferritin comigratory protein                                     | Escherichia coli SET1                     |                                           |
| 198 | 0        | 215487784 | ref | YP_002330215.1 | thiol peroxidase, thioredoxin-dependent                                  | Escherichia coli O127:H6 str. E2348/69    |                                           |
| 199 | 0        | 217327242 | ref | ZP_03443325.1  | peroxiredoxin                                                            | Escherichia coli O157:H7 str. TW14588     |                                           |
| 200 | 0        | 218555006 | ref | YP_002387919.1 | thiol peroxidase, thioredoxin-dependent                                  | Escherichia coli IA1                      |                                           |
| 201 | 0        | 218559416 | ref | YP_002392329.1 | thiol peroxidase, thioredoxin-dependent                                  | Escherichia coli S88                      |                                           |
| 202 | 0        | 218690607 | ref | YP_002398819.1 | thiol peroxidase, thioredoxin-dependent                                  | Escherichia coli ED1a                     |                                           |

|           |          |                |                                                                    |                                                                               |
|-----------|----------|----------------|--------------------------------------------------------------------|-------------------------------------------------------------------------------|
| 218696103 | ref      | YP_002403776.1 | thiol peroxidase, thioredoxin-dependent                            | <i>Escherichia coli</i> 55989                                                 |
| 218700938 | ref      | YP_002408567.1 | thiol peroxidase, thioredoxin-dependent                            | <i>Escherichia coli</i> IA139                                                 |
| 218703929 | ref      | YP_002413498.1 | thiol peroxidase, thioredoxin-dependent                            | <i>Escherichia coli</i> UMN026                                                |
| 83286396  | sp       | P0AE54.1       | BCP_EC057 RecName: Full=Putative peroxidoreductase bcp; AltName: F | <i>Escherichia coli</i> O157:H7                                               |
| 83286397  | sp       | P0AE53.1       | BCP_EC016 RecName: Full=Putative peroxidoreductase bcp; AltName: F | <i>Escherichia coli</i> O6                                                    |
| 83286398  | sp       | P0AE52.1       | BCP_EC016 RecName: Full=Putative peroxidoreductase bcp; AltName: F | <i>Escherichia coli</i> (strain K12)                                          |
| 83286399  | sp       | P0AE55.1       | BCP_SH1FL RecName: Full=Putative peroxidoreductase bcp; AltName: F | <i>Shigella flexneri</i>                                                      |
| 12516862  | gb       | AA657590.1     | AE005477_8 bacterioferritin comigratory protein                    | <i>Escherichia coli</i> O157:H7 EDL_933                                       |
| 26109256  | gb       | AA881458.1     | AE016764_140 Bacterioferritin comigratory protein                  | <i>Escherichia coli</i> CFT073                                                |
| 1788825   | gb       | AA074533.1     | thiol peroxidase, thioredoxin-dependent                            | <i>Escherichia coli</i> str. K-12 substr. MG1655                              |
| 1799908   | dbj      | BAA116358.1    | thiol peroxidase, thioredoxin-dependent                            | <i>Escherichia coli</i> str. K12 substr. W3110                                |
| 2668495   | gb       | AA888562.1     | bacterioferritin comigratory protein                               | <i>Escherichia coli</i>                                                       |
| 13362812  | dbj      | BA836765.1     | bacterioferritin comigratory protein                               | <i>Shigella flexneri</i> 2a str. 301                                          |
| 24052384  | gb       | AA44026.1      | bacterioferritin comigratory protein                               | <i>Shigella flexneri</i> 2a str. 2457T                                        |
| 30042113  | gb       | AA817839.1     | bacterioferritin comigratory protein                               | <i>Shigella sonnei</i> Ss046                                                  |
| 73856483  | gb       | AA289190.1     | bacterioferritin comigratory protein                               | <i>Shigella dysenteriae</i> Sd197                                             |
| 81242010  | gb       | ABB62720.1     | bacterioferritin comigratory protein                               | <i>Shigella boydii</i> S0227                                                  |
| 81246339  | gb       | ABB67047.1     | bacterioferritin comigratory protein                               | <i>Escherichia coli</i> UT189                                                 |
| 91073366  | gb       | ABE08267.1     | thiol peroxidase                                                   | <i>Escherichia coli</i> 536                                                   |
| 110344246 | gb       | ABG70483.1     | bacterioferritin comigratory protein                               | <i>Shigella flexneri</i> 5 str. 8401                                          |
| 110615961 | gb       | ABF04628.1     | bacterioferritin comigratory protein                               | <i>Escherichia coli</i> APEC O1                                               |
| 115513800 | gb       | ABJ01875.1     | thioredoxin-dependent thiol peroxidase                             | <i>Escherichia coli</i> HS                                                    |
| 157067622 | gb       | ABV06877.1     | peroxidoreductin                                                   | <i>Escherichia coli</i> ATCC 8739                                             |
| 157081448 | gb       | ABV21156.1     | peroxidoreductin                                                   | <i>Escherichia coli</i> str. K12 substr. DH108                                |
| 169754163 | gb       | ACA76862.1     | thiol peroxidase, thioredoxin-dependent                            | <i>Escherichia albertii</i> TW07627                                           |
| 16988925  | gb       | ACB06832.1     | peroxidoreductin                                                   | <i>Escherichia coli</i> SMS-3-5                                               |
| 170123796 | gb       | EDS92727.1     | peroxidoreductin                                                   | <i>Shigella boydii</i> CDC 3083-94                                            |
| 170519336 | gb       | ACB17514.1     | peroxidoreductin                                                   | <i>Escherichia coli</i> O157:H7 str. EC4196                                   |
| 187430420 | gb       | ACD09694.1     | peroxidoreductin                                                   | <i>Escherichia coli</i> O157:H7 str. EC4113                                   |
| 18770661  | gb       | EDL34505.1     | peroxidoreductin                                                   | <i>Escherichia coli</i> 53638                                                 |
| 188017083 | gb       | EDU55205.1     | peroxidoreductin                                                   | <i>Escherichia coli</i> O157:H7 str. EC4076                                   |
| 188488240 | gb       | EDU63343.1     | peroxidoreductin                                                   | <i>Escherichia coli</i> O157:H7 str. EC4401                                   |
| 189003376 | gb       | EDU72362.1     | peroxidoreductin                                                   | <i>Escherichia coli</i> O157:H7 str. EC4486                                   |
| 189356568 | gb       | EDU74987.1     | peroxidoreductin                                                   | <i>Escherichia coli</i> O157:H7 str. EC4801                                   |
| 189362322 | gb       | EDU8074.1      | peroxidoreductin                                                   | <i>Escherichia coli</i> O157:H7 str. EC889                                    |
| 18968461  | gb       | EDU86877.1     | peroxidoreductin                                                   | <i>Escherichia coli</i> O157:H7 str. EC508                                    |
| 18972300  | gb       | EDU90716.1     | peroxidoreductin                                                   | <i>Escherichia coli</i> F11                                                   |
| 18978960  | gb       | EDU96976.1     | peroxidoreductin                                                   | <i>Escherichia coli</i> E22                                                   |
| 190902321 | gb       | EDV62060.1     | peroxidoreductin                                                   | <i>Escherichia coli</i> E110019                                               |
| 190906769 | gb       | EDV66373.1     | peroxidoreductin                                                   | <i>Escherichia coli</i> 101-1                                                 |
| 192927576 | gb       | EDV82192.1     | peroxidoreductin                                                   | <i>Escherichia coli</i> O157:H7 str. EC4206                                   |
| 192958283 | gb       | EDV88703.1     | peroxidoreductin                                                   | <i>Escherichia coli</i> O157:H7 str. EC4045                                   |
| 194423513 | gb       | EDX39504.1     | peroxidoreductin                                                   | <i>Escherichia coli</i> O157:H7 str. EC4115                                   |
| 208726321 | gb       | EDZ77922.1     | peroxidoreductin                                                   | <i>Escherichia coli</i> SE11                                                  |
| 208735492 | gb       | EDZ84179.1     | peroxidoreductin                                                   | <i>Escherichia coli</i> O127:H6 str. E2348/69                                 |
| 208742008 | gb       | EDZ89690.1     | peroxidoreductin                                                   | <i>Escherichia coli</i> O157:H7 str. TW14588                                  |
| 209158165 | gb       | ACI95598.1     | peroxidoreductin                                                   | <i>Escherichia coli</i>                                                       |
| 209913214 | dbj      | BA678288.1     | bacterioferritin comigratory protein                               | <i>Bacillus amyloliquefaciens</i> FZB42                                       |
| 215266866 | emb      | CAS10265.1     | thiol peroxidase Bcp, thioredoxin-dependent                        | <i>Bacillus amyloliquefaciens</i> FZB42                                       |
| 217319609 | gb       | EEC28034.1     | peroxidoreductin                                                   | <i>Bacillus amyloliquefaciens</i> FZB42                                       |
| 218352841 | emb      | CAU98635.1     | thiol peroxidase, thioredoxin-dependent                            | <i>Thermoplasma volcanium</i> GSS1                                            |
| 218361774 | emb      | CAQ89371.1     | thiol peroxidase, thioredoxin-dependent                            | <i>Anaplasma phagocytophilum</i> HZ                                           |
| 218366185 | emb      | CAR03931.1     | thiol peroxidase, thioredoxin-dependent                            | <i>Anaplasma phagocytophilum</i> HZ                                           |
| 218570924 | emb      | CAR18743.1     | thiol peroxidase, thioredoxin-dependent                            | <i>Salmonella enterica</i> subsp. enterica serovar Typhimurium LT2            |
| 218428171 | emb      | CAR09085.2     | thiol peroxidase, thioredoxin-dependent                            | <i>Salmonella typhimurium</i> LT2                                             |
| 218433076 | emb      | CAR13971.1     | thiol peroxidase, thioredoxin-dependent                            | <i>Salmonella enterica</i> subsp. enterica serovar Typh. str. CT18            |
| 148       | 0        | 154685335      | ref                                                                | YP_001420496.1<br>YgaF                                                        |
| 149       | 0        | 14324655       | dbj                                                                | BA659562.1<br>bacterioferritin comigratory protein                            |
| 150       | 1.91E-14 | 88601785       | ref                                                                | YP_005372.1<br>anti-oxidant AhpC/TSA family protein                           |
| 151       | 0        | 16761408       | ref                                                                | NP_457025.1<br>antioxidant, AhpC/Tsa family                                   |
| 29140895  | ref      | NP_804237.1    | thioredoxin-dependent thiol peroxidase                             | <i>Salmonella enterica</i> subsp. enterica serovar Paratyphi B str. SPB7      |
| 62181056  | ref      | YP_217473.1    | thioredoxin-dependent thiol peroxidase                             | <i>Salmonella enterica</i> subsp. enterica serovar Paratyphi B str. SPB7      |
| 161902388 | ref      | YP_001569470.1 | thioredoxin-dependent thiol peroxidase                             | <i>Salmonella enterica</i> subsp. enterica serovar Saimpaul str. SARA29       |
| 161612759 | ref      | YP_02343253.1  | putative peroxidoreductin bcp                                      | <i>Salmonella enterica</i> subsp. enterica serovar 4 [5] 12:i:- str. CVM23701 |
| 167991796 | ref      | ZP_02572895.1  | putative peroxidoreductin bcp                                      | <i>Salmonella enterica</i> subsp. enterica serovar Kentucky str. CDC 191      |
| 168232037 | ref      | ZP_02667095.1  | putative peroxidoreductin bcp                                      | <i>Salmonella enterica</i> subsp. enterica serovar Schwarzengrund str. SL 480 |
| 168238203 | ref      | ZP_02663261.1  | peroxidoreductin Q. (Thioredoxinreductase)                         | <i>Salmonella enterica</i> subsp. enterica serovar Schwarzengrund str. SL 480 |

|           |     |                |                                                                         |                                                                          |
|-----------|-----|----------------|-------------------------------------------------------------------------|--------------------------------------------------------------------------|
| 168243264 | ref | ZP_02668196.1  | putative peroxiredoxin bcp                                              | Saimonella enterica subsp. enterica serovar Heidelberg str. SL486        |
| 168261474 | ref | ZP_026683447.1 | putative peroxiredoxin bcp                                              | Saimonella enterica subsp. enterica serovar Hadar str. RI_05P066         |
| 168466766 | ref | ZP_02700820.1  | peroxiredoxin Q, (Thioredoxinreductase)                                 | Saimonella enterica subsp. enterica serovar Newport str. SL317           |
| 168817788 | ref | ZP_02829758.1  | putative peroxiredoxin bcp                                              | Saimonella enterica subsp. enterica serovar Wellvedren str. HI_N05-537   |
| 19444441  | ref | YP_002044750.1 | peroxiredoxin Q                                                         | Saimonella enterica subsp. enterica serovar Newport str. SL254           |
| 194450382 | ref | YP_002046554.1 | peroxiredoxin Q                                                         | Saimonella enterica subsp. enterica serovar Newport str. SL254           |
| 19471649  | ref | ZP_03077633.1  | peroxiredoxin Q                                                         | Saimonella enterica subsp. enterica serovar Heidelberg str. SL476        |
| 194736256 | ref | YP_002115554.1 | peroxiredoxin Q                                                         | Saimonella enterica subsp. enterica serovar Kentucky str. CVM29188       |
| 197251774 | ref | YP_002147442.1 | peroxiredoxin Q                                                         | Saimonella enterica subsp. enterica serovar Schwarzengrund str. CVM19633 |
| 197264121 | ref | YP_03164195.1  | peroxiredoxin Q                                                         | Saimonella enterica subsp. enterica serovar Agona str. SL483             |
| 198243671 | ref | YP_002216556.1 | putative peroxiredoxin bcp                                              | Saimonella enterica subsp. enterica serovar Sainpaul str. SARA23         |
| 200386725 | ref | ZP_03213337.1  | putative peroxiredoxin bcp                                              | Saimonella enterica subsp. enterica serovar Dublin str. CT_02021853      |
| 204929474 | ref | ZP_03220548.1  | putative peroxiredoxin bcp                                              | Saimonella enterica subsp. enterica serovar Vichow str. SL491            |
| 207857902 | ref | YP_002244563.1 | hypothetical protein SEN2470                                            | Saimonella enterica subsp. enterica serovar Javiana str. GA_MM04042433   |
| 213160895 | ref | ZP_03346605.1  | thioredoxin-dependent thiol peroxidase                                  | Saimonella enterica subsp. enterica serovar Typhi str. P125109           |
| 213421017 | ref | ZP_03354083.1  | thioredoxin-dependent thiol peroxidase                                  | Saimonella enterica subsp. enterica serovar Typhi str. E00-7866          |
| 213425355 | ref | ZP_03358105.1  | thioredoxin-dependent thiol peroxidase                                  | Saimonella enterica subsp. enterica serovar Typhi str. E01-6750          |
| 213585729 | ref | ZP_03367555.1  | thioredoxin-dependent thiol peroxidase                                  | Saimonella enterica subsp. enterica serovar Typhi str. E02-1180          |
| 213621141 | ref | ZP_03373924.1  | thioredoxin-dependent thiol peroxidase                                  | Saimonella enterica subsp. enterica serovar Typhi str. E08-0664          |
| 213852466 | ref | ZP_03381998.1  | thioredoxin-dependent thiol peroxidase                                  | Saimonella enterica subsp. enterica serovar Typhi str. E98-2068          |
| 214002878 | ref | ZP_03413613.1  | thioredoxin-dependent thiol peroxidase                                  | Saimonella enterica subsp. enterica serovar Typhi str. M223              |
| 25319010  | plr |                | AG0817 bacterioferritin comigratory protein - imported                  | Saimonella enterica subsp. enterica serovar Typhi str. E98-3139          |
| 16421033  | gb  | AA121385.1     | thioredoxin dependent thiol peroxidase                                  | Saimonella typhimurium LT2                                               |
| 16503708  | emb | CA002691.1     | bacterioferritin comigratory protein                                    | Saimonella enterica subsp. enterica serovar Typhi                        |
| 29138520  | gb  | AA068086.1     | bacterioferritin comigratory protein                                    | Saimonella enterica subsp. enterica serovar Typhi Ty2                    |
| 62128689  | gb  | AA068392.1     | thiol peroxidase; thioredoxin dependent                                 | Saimonella enterica subsp. enterica serovar Choleraesuis str. SC-867     |
| 160963705 | gb  | ABX20328.1     | hypothetical protein SARI_00391                                         | Saimonella enterica subsp. arizonae serovar 62.24.223.--                 |
| 161362123 | gb  | ABX65891.1     | peroxiredoxin Q                                                         | Saimonella enterica subsp. enterica serovar Paratyphi B str. SPB7        |
| 194405074 | gb  | ACF63296.1     | peroxiredoxin Q                                                         | Saimonella enterica subsp. enterica serovar Newport str. SL254           |
| 194408666 | gb  | ACF68905.1     | peroxiredoxin Q                                                         | Saimonella enterica subsp. enterica serovar Heidelberg str. SL476        |
| 194458013 | gb  | EDX48852.1     | peroxiredoxin Q                                                         | Saimonella enterica subsp. enterica serovar Kentucky str. CVM29188       |
| 194711758 | gb  | ACF90979.1     | peroxiredoxin Q                                                         | Saimonella enterica subsp. enterica serovar Schwarzengrund str. CVM19633 |
| 195630836 | gb  | EDX49428.1     | peroxiredoxin Q, (Thioredoxinreductase)                                 | Saimonella enterica subsp. enterica serovar Newport str. SL317           |
| 197215471 | gb  | ACF52874.1     | peroxiredoxin Q                                                         | Saimonella enterica subsp. enterica serovar Agona str. SL483             |
| 197242376 | gb  | EDV24936.1     | peroxiredoxin Q                                                         | Saimonella enterica subsp. enterica serovar Sainpaul str. SARA23         |
| 197288941 | gb  | EDV28314.1     | peroxiredoxin Q, (Thioredoxinreductase)                                 | Saimonella enterica subsp. enterica serovar Schwarzengrund str. SL480    |
| 197938187 | gb  | ACH75520.1     | putative peroxiredoxin bcp                                              | Saimonella enterica subsp. enterica serovar Dublin str. CT_02021853      |
| 199603823 | gb  | EDV202368.1    | putative peroxiredoxin bcp                                              | Saimonella enterica subsp. enterica serovar Vichow str. SL491            |
| 204321193 | gb  | EDV206393.1    | putative peroxiredoxin bcp                                              | Saimonella enterica subsp. enterica serovar Javiana str. GA_MM04042433   |
| 205325289 | gb  | EDJ13108.1     | putative peroxiredoxin bcp                                              | Saimonella enterica subsp. enterica serovar Sainpaul str. SARA29         |
| 205329830 | gb  | EDJ16594.1     | putative peroxiredoxin bcp                                              | Saimonella enterica subsp. enterica serovar 4.15.12.i- str. CVM23701     |
| 205333549 | gb  | EDJ20313.1     | putative peroxiredoxin bcp                                              | Saimonella enterica subsp. enterica serovar Kentucky str. CDC_191        |
| 205337624 | gb  | EDJ24398.1     | putative peroxiredoxin bcp                                              | Saimonella enterica subsp. enterica serovar Heidelberg str. SL486        |
| 205344800 | gb  | EDJ231584.1    | putative peroxiredoxin bcp                                              | Saimonella enterica subsp. enterica serovar Newport str. HI_N05-537      |
| 205349557 | gb  | EDZ36188.1     | putative peroxiredoxin bcp                                              | Saimonella enterica subsp. enterica serovar Hadar str. RI_05P066         |
| 206707075 | emb | CA034055.1     | conserved hypothetical protein                                          | Saimonella enterica subsp. enterica serovar Enteritidis str. P125109     |
| 78778738  | ref | YP_393850.1    | putative bacterioferritin comigratory protein                           | QNGIKRSfypkddtpgctievGVSNGshlaenknk                                      |
| 78712237  | gb  | AB849414.1     | putative bacterioferritin comigratory protein                           | Prochlorococcus marinus str. MIT 9312                                    |
| 23501808  | ref | NP_697935.1    | bacterioferritin comigratory protein                                    | Prochlorococcus marinus str. MIT 9312                                    |
| 62289865  | ref | YP_221658.1    | Bcp, bacterioferritin comigratory protein                               | Bruceella suis 1330                                                      |
| 82599792  | ref | YP_414366.1    | Bcp, bacterioferritin comigratory protein                               | Bruceella abortus bv. 1 str. 9-941                                       |
| 161618800 | ref | YP_001592767.1 | alkyl hydroperoxide reductase/ Thiol specific antioxidant/ Mal allergen | Bruceella mellitensis biovar Abortus 2308                                |
| 163843193 | ref | YP_001627597.1 | alkyl hydroperoxide reductase/ Thiol specific antioxidant/ Mal allergen | Bruceella canis ATCC 23365                                               |
| 189024107 | ref | YP_001934875.1 | alkyl hydroperoxide reductase/ Thiol specific antioxidant/ Mal allergen | Bruceella suis ATCC 23445                                                |
| 23347741  | gb  | AA029850.1     | alkyl hydroperoxide reductase                                           | Bruceella abortus S19                                                    |
| 62195997  | gb  | AA074297.1     | bacterioferritin comigratory protein                                    | Bruceella suis 1330                                                      |
| 82615893  | emb | CAJ10897.1     | Bcp, bacterioferritin comigratory protein                               | Bruceella abortus biovar 1 str. 9-941                                    |
| 161335661 | gb  | ABX61996.1     | alkyl hydroperoxide reductase/ Thiol specific antioxidant/ Mal allergen | Bruceella mellitensis biovar Abortus 2308                                |
| 163673916 | gb  | ABY38027.1     | alkyl hydroperoxide reductase/ Thiol specific antioxidant/ Mal allergen | Bruceella canis ATCC 23365                                               |
| 189019679 | gb  | ACD72401.1     | alkyl hydroperoxide reductase                                           | Bruceella suis ATCC 23445                                                |
| 194289913 | ref | YP_002005820.1 | Putative peroxiredoxin                                                  | Bruceella abortus S19                                                    |
| 193223748 | emb | CA069755.1     | Putative peroxiredoxin                                                  | Cupriavidus taiwanensis                                                  |
| 160892127 | ref | EDP_02073130.1 | hypothetical protein BACUNJI_04590                                      | Cupriavidus taiwanensis                                                  |
| 156858605 | gb  | ED052036.1     | hypothetical protein BACUNJI_04590                                      | Bacteroides uniformis ATCC 8492                                          |
| 167464105 | ref | ZP_02329194.1  | alkyl hydroperoxide reductase/ Thiol specific antioxidant/ Mal allergen | Bacteroides uniformis ATCC 8492                                          |
| 90417700  | ref | YP_012256612.1 | bacterioferritin comigratory protein                                    | Paenibacillus larvae subsp. larvae BRL-230010                            |
| 90337372  | gb  | EA551023.1     | bacterioferritin comigratory protein                                    | Aurantimonas sp. S185-9A1                                                |
| 217958073 | ref | YP_002336617.1 | bacterioferritin comigratory protein                                    | Bacillus cereus H2081.97                                                 |
| 206747491 | gb  | EDJ58681.1     | bacterioferritin comigratory protein                                    | Bacillus cereus AH187                                                    |
| 217068172 | gb  | ACJ82422.1     | bacterioferritin comigratory protein                                    | Bacillus cereus H3081.97                                                 |
|           |     |                |                                                                         | Bacillus cereus AH187                                                    |

|     |          |               |                |                                                                        |                                                              |                                          |
|-----|----------|---------------|----------------|------------------------------------------------------------------------|--------------------------------------------------------------|------------------------------------------|
| 159 | 4.28E-11 | 198254450.gb  | EDY78764.1     | antioxidant, AhpC/TSA family                                           | Octadecabacter antarcticus 307                               | YFYPRDDTTPGCTTTEAlaIlaaasGVSKDkhekliahd  |
| 160 | 0        | 20808004.ref  | NP_623175.1    | peroxidoxin                                                            | Thermoanaerobacter tengcongensis MB4                         | YFYPKDNTPGCTKEAVglsidSHRKFIEKYStkgliers  |
| 161 | 0        | 20516500.gb   | AAIM24779.1    | Peroxiredoxin                                                          | Thermoanaerobacter tengcongensis MB4                         | TGGGARSTfypaamipngpckkeacGLSADkqkafojdqk |
| 162 | 0        | 413995752.gb  | AA503819.1     | BcpB                                                                   | Mycobacterium avium subsp. paratuberculosis K-10             | YFYPKAMTPGCTVQAQgvsdpdRLPKFIEKEGygdghri  |
| 163 | 0        | 119356712.ref | ZP_01449878.1  | redoxin domain-containing protein                                      | Mycobacterium avium subsp. paratuberculosis K-10             | YFYPKDDTTPGCTKEACgvsdvrHKKFAEKTYmgmiv    |
| 164 | 1.38E-09 | 154274343.ref | XP_001538023.1 | predicted protein                                                      | Chlorobium phaeobacteroides DSM 266                          | VAAIIPRPfyrasipgctltqvccGLSADanantksqkn  |
| 165 | 0        | 116671092.ref | YP_832025.1    | redoxin domain-containing protein                                      | Chlorobium phaeobacteroides DSM 266                          | YFYPAASTPGCTKEACgvsdpdKLAFAEKEGyegljrs   |
| 166 | 0        | 116611201.gb  | ABK03925.1     | Redoxin domain protein                                                 | Chlorobium phaeobacteroides DSM 266                          | YFYPKDNTPGCTLEACgvsdpdSHVNFQKHNYegljrs   |
| 167 | 2.63E-13 | 150015651.gb  | EDN10984.1     | predicted protein                                                      | Aejliomyces capsulatus Nam1                                  | YFYPKDNTPGCSOEAGgirsSHDKFIAKYEsigljrs    |
| 168 | 0        | 188526940.ref | YP_001909627.1 | bacterioferritin comigratory protein                                   | Campylobacter lari RM2100                                    | YFYPKDNTPGCTLEAKgvsdpdSHQHKFISQCSHgljrs  |
| 169 | 0        | 163782107.ref | ZP_021717106.1 | bacterioferritin comigratory protein                                   | Arthrobacter sp. FB24                                        | YFYPKDNTPGCTVEACgvsdpdSHKKFKREKYDlkgjrs  |
| 170 | 9.68E-15 | 67921313.ref  | ZP_00514832.1  | Alkyl hydroperoxide reductase/Thiol specific antioxidant/ Mal allergen | Hydrogenivirga sp. 128-5-R1-1                                | YFYPKDFTPGCTLEARGvswvSHREFCDAEGrpalsq    |
| 171 | 1.69E-14 | 147847917.emb | CAK23468.1     | Peroxiredoxin                                                          | Hydrogenivirga sp. 128-5-R1-1                                | LKGKLLVfypkddltpgctaeacGVSDGshrrtaefhq   |
| 172 | 3.78E-11 | 119511628.ref | ZP_01630734.1  | Alkyl hydroperoxide reductase/Thiol specific antioxidant/ Mal allergen | Crocospaera watsonii WH 8501                                 | LPAINQVfypkdfisgctlearDLPKYIEKNYgvsad    |
| 174 | 0        | 24373442.ref  | NP_717485.1    | thioredoxin-dependent thiol peroxidase                                 | Synechococcus sp. WH 7803                                    | YFYPKASTPGCTVQAQgvsdpdKLAFAEKEQSDygdhri  |
| 175 | 0        | 23465396.ref  | AA54929.1      | thioredoxin-dependent thiol peroxidase                                 | Nodularia spumigena CCY9414                                  | YFYPAAMTPGCTTEACgvsdKLRKFAERDHHvgrs      |
| 176 | 8.18E-13 | 169774049.ref | XP_001821493.1 | hypothetical protein                                                   | Shewanella oneidensis MR-1                                   | PVAEKRRfyrpasipgctkqacGLSADantfkakqs     |
| 177 | 6.54E-17 | 48477475.ref  | YP_023181.1    | Alkyl hydroperoxide reductase                                          | Aspergillus oryzae                                           | YFYPKDFTPGCTTEACgvsdSHRKFREKRYPdglrk     |
| 178 | 5.05E-11 | 149928833.ref | ZP_01915092.1  | Alkyl hydroperoxide reductase/Thiol specific antioxidant/ Mal allergen | Picrophilus torridus DSM 9790                                | TL5AHAGKNLVfypkdsipgctegegVSRDvrgvrs     |
| 179 | 9.21E-16 | 90881628.ref  | ZP_01237419.1  | bacterioferritin comigratory protein                                   | Limobacter sp. MED105                                        | LQKKLVfyrpasipgctwaqGVSPDqikfmgfkn       |
| 180 | 5.85E-11 | 217413592.ref | ZP_0344752.1   | hypothetical protein BIF-GAL_01558                                     | Vibrio angustum S14                                          | FFYPAQMSLLCTFEAKgvsdpdKLOEFREKYNdgkdel   |
| 181 | 1.24E-12 | 110004409.emb | CAK98747.1     | probable alkyl hydroperoxide reductase oxidoreductase protein          | Bifidobacterium gallium DSM 20093                            | YFFPKAATPGCTLETLgirsKQTKFQNDNNfjgljrs    |
| 182 | 0        | 171913934.ref | ZP_02929404.1  | alkyl hydroperoxide reductase/Thiol specific antioxidant/ Mal allergen | Spiroplasma citri                                            | ACGGHASTfypkchpigtgctgacGVSDshetrkfkhe   |
| 183 | 0        | 57640980.ref  | YP_183468.1    | peroxidoxin bacterioferritin comigratory protein                       | Verrucomicrobium spinosum DSM 4136                           | YFYPKDNTPGCTTEAKgvsdSHRKFREKRYHvgrls     |
| 184 | 0        | 78183965.ref  | YP_376400.1    | putative bacterioferritin comigratory (BCP) protein                    | Thermococcus kodakarensis KOD1                               | LKGKRVVfypkddltpgctkqacGLSISDKshkfkshks  |
| 185 | 0        | 114563035.ref | ABR25356.1     | putative bacterioferritin comigratory (BCP) protein                    | Synechococcus sp. CC9902                                     | YFYPKASTPGCTVQAQgvsdpdKLAFAEKEQYgdhri    |
| 187 | 5.79E-12 | 206886416.gb  | EDJ246898.1    | AhpC/TSA family protein                                                | Shewanella frigidimarina NCIMB 400                           | FFYPRDDTTPGCTKESlqlafadagaGISKDhwgljrs   |
| 188 | 0        | 196040205.ref | ZP_03107507.1  | bacterioferritin comigratory protein                                   | Rhodobacteriales bacterium Y41                               | YFYPKDNTPGCTTEACgylfgeklgtGVSPDymgljrs   |
| 189 | 0        | 145223122.ref | YP_001133800.1 | alkyl hydroperoxide reductase/Thiol specific antioxidant/ Mal allergen | Bacillus cereus NVH0597-99                                   | YFYPAASTPGCTKQACgvsdpdKLAFAEKEKvvgvrs    |
| 190 | 2.87E-11 | 103486650.ref | YP_616211.1    | alkyl hydroperoxide reductase/Thiol specific antioxidant/ Mal allergen | Mycobacterium gilvum PYR-GCK                                 | APGIAALslealkgbyFFPAAFTFGCTLEAHvaad      |
| 191 | 0        | 213002598.ref | ZP_03339745.1  | alkyl hydroperoxide reductase/Thiol specific antioxidant/ Mal allergen | Mycobacterium gilvum PYR-GCK                                 | YFYPKAMTPGCTVQAQgvsdtkGLSRFAEKELygdhri   |
| 192 | 2.47E-14 | 206890099.ref | YP_002246515.1 | thioredoxin-dependent thiol peroxidase                                 | Salmonella enterica subsp. enterica serovar Typh. str. 404ty | YFYPKAMTPGCTTEAEgvsdtkGLKFKREKvGumgljrs  |
| 193 | 0        | 157375569.ref | YP_001474168.1 | bacterioferritin comigratory protein                                   | Coprothermobacter proteolyticus DSM 5265                     | YFYPKASTPGCTVQAQgvsdpdKLAFAEKEQYgdhri    |
| 195 | 1.44E-12 | 114331620.ref | YP_747842.1    | redoxin domain-containing protein                                      | Shewanella sediminis HAW-EB3                                 | FFYPKDDTTPGCTNEGGqirsSHSEKREKRYNvrgljrs  |
| 196 | 0        | 56460569.gb   | AAV155850.1    | alkyl hydroperoxide reductase/Thiol specific antioxidant/ Mal allergen | Nitrosomonas eutropha C91                                    | YFYPKAMTPGCTVQAQgvsdpdKGLKFKFMKEYrisfl   |
| 197 | 2.97E-14 | 113476719.ref | YP_722780.1    | peroxidoxin, bacterioferritin comigratory protein                      | Idiomarina lathiensis L21R                                   | YFYPKDDTTPGCKIQACglsgdSHKQISTKYStkgilry  |
| 198 | 2.80E-11 | 206559457.ref | YP_002230218.1 | putative redoxin protein                                               | Trichodesmium erythraeum IMS101                              | YFYPAAFTKGCTTEAEHvsaclPALDRAsipdkhven    |
| 199 | 4.61E-15 | 189183707.ref | YP_001937482.1 | peroxidoxin, AhpC/TSA family protein                                   | Burkholderia cenocepacia J2315                               | YFYPKDNTPGCTLEAQgvsdksHGKFKDKLCoakkaa    |
| 200 | 4.03E-09 | 170694552.ref | ZP_02885704.1  | alkyl hydroperoxide reductase/Thiol specific antioxidant/ Mal allergen | Orientia tsutsugamushi str. Ikeda                            | LPVALAayfpaafkgtclieahGVSHDIsipshkven    |



|     |                |                |                                                                         |                                                    |                                           |
|-----|----------------|----------------|-------------------------------------------------------------------------|----------------------------------------------------|-------------------------------------------|
| 201 | 170140434.gb   | EDT08610.1     | alkyl hydroperoxide reductase/ Thiol specific antioxidant/ Mai allergen | Burkholderia graminis CAD7M                        | SLSDFAGERYVYpkanipgctkeaccGISPDVqgvr      |
| 202 | 25022894.1.ref | NP_738997.1    | putative bacterioferritin comigratory protein                           | Corynebacterium efficiens YS-314                   | YFYPKNDITPGCTTEGLgvrSHDNFNKAKLEvrglrs     |
| 203 | 23494230.dbj   | BAC19197.1     | putative bacterioferritin comigratory protein                           | Corynebacterium efficiens YS-314                   | YFYPKNDITPGCTTEGLgvrSHDNFNKAKLEvrglrs     |
| 204 | 2095019529.ref | YP_052686322.1 | alkyl hydroperoxide reductase/ Thiol specific antioxidant/ Mai allergen | Burkholderia sp. H160                              | YFYPKAAATPGCTVQACgispkLAKFAEKQAYdghrl     |
| 205 | 2095000108.ref | IEEA00071.1    | alkyl hydroperoxide reductase/ Thiol specific antioxidant/ Mai allergen | Burkholderia sp. H160                              | YFYPKAAATPGCTVQACgispkLAKFAEKQAYdghrl     |
| 206 | 151365727.gb   | AB5308727.1    | thioredoxin-dependent thiol peroxidase                                  | Shewanella baltica OS 185                          | WFFPKANTPGCTVQARSwaaladgVGSVDviahwq       |
| 207 | 151365727.gb   | AB5308727.1    | alkyl hydroperoxide reductase/ Thiol specific antioxidant/ Mai allergen | Shewanella baltica OS 185                          | WFFPKANTPGCTVQARSwaaladgVGSVDviahwq       |
| 208 | 1529666672.ref | YP_001366790.1 | alkyl hydroperoxide reductase/ Thiol specific antioxidant/ Mai allergen | Kineococcus radiolarians SRS30216                  | EYVDIAPYpklfdifagctleakLKKDF-SKYNglsad    |
| 209 | 15360189.gb    | AB5503192.1    | alkyl hydroperoxide reductase/ Thiol specific antioxidant/ Mai allergen | Kineococcus radiolarians SRS30216                  | EYVDIAPYpklfdifagctleakLKKDF-SKYNglsad    |
| 210 | 1232000584.gb  | ABM72192.1     | alkyl hydroperoxide reductase/ Thiol specific antioxidant/ Mai allergen | Kineococcus radiolarians SRS30216                  | EYVDIAPYpklfdifagctleakLKKDF-SKYNglsad    |
| 211 | 149923275.ref  | YP_01911685.1  | alkyl hydroperoxide reductase/ Thiol specific antioxidant/ Mai allergen | Prochlorococcus marinus str. MIT 9515              | AKKKAANKKTYpdrnitsgctleakGVSTDvymgms      |
| 212 | 88905753.ref   | YP_001248405.1 | alkyl hydroperoxide reductase/ Thiol specific antioxidant/ Mai allergen | Prochlorococcus marinus str. MIT 9515              | AKKKAANKKTYpdrnitsgctleakGVSTDvymgms      |
| 213 | 149923275.ref  | EDM75392.1     | bacterioferritin comigratory protein                                    | Plesiocystis pacifica SIR-1                        | YFYPKNDITPGCTTEAGgvsksHSHQKFKDKLCAkaka    |
| 214 | 148284315.ref  | YP_001248405.1 | bacterioferritin comigratory protein                                    | Orientia tsusugamushi str. Boryong                 | YFYPKNDITPGCTTEAGgvsksHSHQKFKDKLCAkaka    |
| 215 | 146739764.emb  | CAIM79610.1    | bacterioferritin comigratory protein                                    | Orientia tsusugamushi Boryong                      | YFYPKNDITPGCTTEAGgvsksHSHQKFKDKLCAkaka    |
| 216 | 126662139.ref  | YP_017933138.1 | bacterioferritin comigratory protein-like                               | Flavobacteria bacterium BAL38                      | YFYPKDFITPGCTTQACgvsgrdSHQNFQKRYKsakhli   |
| 217 | 126625518.gb   | EA296207.1     | bacterioferritin comigratory protein-like                               | Flavobacteria bacterium BAL38                      | YFYPKDFITPGCTTQACgvsgrdSHQNFQKRYKsakhli   |
| 218 | 161528068.ref  | YP_001581894.1 | alkyl hydroperoxide reductase/ Thiol specific antioxidant/ Mai allergen | Nitrosopumilus maritimus SCM1                      | YFYPKDFITPGCTTQACgvsgrdSHQNFQKRYKsakhli   |
| 219 | 160339369.gb   | ABX12456.1     | alkyl hydroperoxide reductase/ Thiol specific antioxidant/ Mai allergen | Nitrosopumilus maritimus SCM1                      | YFYPKDFITPGCTTQACgvsgrdSHQNFQKRYKsakhli   |
| 220 | 23007301.ref   | YP_00049232.1  | alkyl hydroperoxide reductase/ Thiol specific antioxidant/ Mai allergen | Magnetspirillum magnetotacticum MS-1               | YFYPKDDITPGCTLEAGgvspsdSHDKFRAKYGGeglanl  |
| 221 | 91070599.gb    | ABE114663.1    | bacterioferritin comigratory protein                                    | Uncultured Prochlorococcus marinus clone HOT0M-786 | LVVNLLYpklfdifagctleakLKKDF-SKYNglsad     |
| 222 | 88784571.gb    | EAR15741.1     | bacterioferritin comigratory protein                                    | Robiginitalea biformata HTCC2501                   | FFYPKADITPGCTAEACgvsadKQAKFRDKYVsyghlk    |
| 223 | 21221348.ref   | NP_627127.1    | hypothetical protein                                                    | Streptomyces coelicolor A3(2)                      | YFYPKADITPGCTAEACgvsadKQAKFRDKYVsyghlk    |
| 224 | 7638005.emb    | CAB88842.1     | bacterioferritin comigratory protein                                    | Streptomyces coelicolor A3(2)                      | YFYPKADITPGCTAEACgvsadKQAKFRDKYVsyghlk    |
| 225 | 109948929.ref  | YP_664157.1    | bacterioferritin comigratory protein                                    | Helicobacter acinonychis str. Sheeba               | YFYPKNDITPGCTLEAGgvspsdSHQKFSQCSHlgllrs   |
| 226 | 109714150.emb  | CAJ991358.1    | bacterioferritin comigratory protein                                    | Helicobacter acinonychis str. Sheeba               | YFYPKNDITPGCTLEAGgvspsdSHQKFSQCSHlgllrs   |
| 227 | 84494374.ref   | YP_00993493.1  | putative bacterioferritin comigratory protein                           | Janibacter sp. HTCC2649                            | YFYPKADITPGCTAEACgvsadKQAKFRDKYVsyghlk    |
| 228 | 84383867.gb    | EAP99747.1     | putative bacterioferritin comigratory protein                           | Janibacter sp. HTCC2649                            | YFYPKADITPGCTAEACgvsadKQAKFRDKYVsyghlk    |
| 229 | 172038271.ref  | YP_001804772.1 | putative bacterioferritin comigratory protein                           | Cyanosyce sp. ATCC 51142                           | YFYPKDDITPGCTKEAGgvsmsdSHKAFKEKYGegllsy   |
| 230 | 171699725.gb   | AC852706.1     | putative bacterioferritin comigratory protein                           | Cyanosyce sp. ATCC 51142                           | YFYPKDDITPGCTKEAGgvsmsdSHKAFKEKYGegllsy   |
| 231 | 168882410.gb   | AC881320.1     | alkyl hydroperoxide reductase/ Thiol specific antioxidant/ Mai allergen | Methylobacterium populi BJ001                      | LPGAGGEYpklfdifagctleagVSPDshnkdfrakyy    |
| 232 | 179345908.gb   | ACB81320.1     | alkyl hydroperoxide reductase/ Thiol specific antioxidant/ Mai allergen | Methylobacterium populi BJ001                      | LPGAGGEYpklfdifagctleagVSPDshnkdfrakyy    |
| 233 | 197625530.gb   | EDY938098.1    | bacterioferritin comigratory protein                                    | Cyanobium sp. PCC 7001                             | APLIALAFykpdkitpctkeaccGVSGDshqfrqtrhn    |
| 234 | 41409427.ref   | NP_961263.1    | hypothetical protein                                                    | Mycobacterium avium subsp. paratuberculosis K-10   | YFYPKADITPGCTKEAGgvsmsdSHKAFKEKYGegllsy   |
| 235 | 413987633.gb   | AA504646.1     | Bcp                                                                     | Mycobacterium avium subsp. paratuberculosis K-10   | YFYPKADITPGCTKEAGgvsmsdSHKAFKEKYGegllsy   |
| 236 | 159028619.emb  | CAO90622.1     | unmated protein product                                                 | Mycobacterium avium subsp. paratuberculosis K-10   | YFYPKADITPGCTKEAGgvsmsdSHKAFKEKYGegllsy   |
| 237 | 86808536.ref   | YP_477298.1    | anti-oxidant AhpC/TSA family protein                                    | Synechococcus sp. JA-2-3B a(2-13)                  | YFYPKDDITPGCTLEAGgvsmsdSHQKFTKYNygeklak   |
| 238 | 66557078.gb    | ABD02035.1     | antioxidant. AhpC/Ts aa family                                          | Synechococcus sp. JA-2-3B a(2-13)                  | YFYPKDDITPGCTLEAGgvsmsdSHQKFTKYNygeklak   |
| 239 | 91204994.ref   | YP_537349.1    | bacterioferritin comigratory protein                                    | Rickettsia bellii RML369-C                         | YFYPKADITPGCTKEAGgvsmsdSHKAFKEKYGegllsy   |
| 240 | 157827674.ref  | YP_001496738.1 | bacterioferritin comigratory protein                                    | Rickettsia bellii OSU 85-389                       | YFYPKADITPGCTKEAGgvsmsdSHKAFKEKYGegllsy   |
| 241 | 91068538.gb    | ABE04280.1     | Bacterioferritin comigratory protein                                    | Rickettsia bellii RML369-C                         | YFYPKADITPGCTKEAGgvsmsdSHKAFKEKYGegllsy   |
| 242 | 157802978.gb   | ABV79701.1     | Bacterioferritin comigratory protein                                    | Rickettsia bellii OSU 85-389                       | YFYPKADITPGCTKEAGgvsmsdSHKAFKEKYGegllsy   |
| 243 | 115524980.ref  | YP_781894.1    | redoxin domain-containing protein                                       | Rhodopseudomonas palustris BisA53                  | AAGSGAAshkpaakliffFYPRAGTPGCTREAlgvsad    |
| 244 | 126649115.ref  | ABJ08911.1     | redoxin domain protein                                                  | Rhodopseudomonas palustris BisA53                  | AAGSGAAshkpaakliffFYPRAGTPGCTREAlgvsad    |
| 245 | 1266574694.gb  | EA279081.1     | putative bacterioferritin co-migratory protein                          | Algoriphagus sp. PR1                               | FEAKIESYpklfdipgctkeaccGVSSDshqkfktaqs    |
| 246 | 14764582.ref   | YP_01443786.1  | peroxiredoxin                                                           | Algoriphagus sp. PR1                               | FFYPKDDITPGCTKEAGgvsmsdSHQKFTKYNygeklak   |
| 247 | 114542988.gb   | EAU46978.1     | Peroxioredoxin                                                          | Roseovarius sp. HTCC2601                           | FFYPKDDITPGCTKEAGgvsmsdSHQKFTKYNygeklak   |
| 248 | 113460638.ref  | YP_718704.1    | thioredoxin-dependent thiol peroxidase                                  | Roseovarius sp. HTCC2601                           | FFYPKDDITPGCTKEAGgvsmsdSHQKFTKYNygeklak   |
| 249 | 112822681.gb   | ABI24770.1     | bacterioferritin comigratory protein                                    | Haemophilus somnus 129PT                           | YFYPKALTPGCTTQACgvspsdKLANFIEKKAfdghrl    |
| 250 | 13541117.ref   | NP_110805.1    | peroxiredoxin                                                           | Haemophilus somnus 129PT                           | YFYPKALTPGCTTQACgvspsdKLANFIEKKAfdghrl    |
| 251 | 14324503.dbj   | BA859431.1     | bacterioferritin comigratory protein                                    | Thermoplasma volcanium GSS1                        | AFFFGAFTSVCTKEMCgvsdSLAEFAKKNHleakrs      |
| 252 | 194963195.ref  | YP_002096218.1 | bacterioferritin comigratory protein                                    | Burkholderia dolosa AU0158                         | Burkholderia dolosa AU0158                |
| 253 | 124894819.gb   | EA768699.1     | Peroxioredoxin                                                          | Burkholderia dolosa AU0158                         | Burkholderia dolosa AU0158                |
| 254 | 218895591.ref  | YP_002444002.1 | bacterioferritin comigratory protein                                    | Bacillus cereus G9842                              | YFYPKDMITPGCTTEACgvspsdRHLKFKIEKHEymgiers |
| 255 | 218543710.gb   | ACR96104.1     | bacterioferritin comigratory protein                                    | Bacillus cereus G9842                              | YFYPKDMITPGCTTEACgvspsdRHLKFKIEKHEymgiers |
| 256 | 1239665324.ref | YP_001010405.1 | putative bacterioferritin comigratory (BCP) protein                     | Prochlorococcus marinus str. MIT 9515              | YFYPKNDITPGCTKEAGglsksHSLKIEKFDikvkaal    |
| 257 | 123199690.gb   | ABM71298.1     | putative bacterioferritin comigratory (BCP) protein                     | Prochlorococcus marinus str. MIT 9515              | YFYPKNDITPGCTKEAGglsksHSLKIEKFDikvkaal    |
| 258 | 148242441.ref  | YP_001227598.1 | peroxiredoxin                                                           | Synechococcus sp. RCC307                           | LGKKPLVfypkdkdtpgctleaccGVSGDshrfvskfq    |
| 259 | 147850751.emb  | CAK28245.1     | Peroxioredoxin                                                          | Synechococcus sp. RCC307                           | LGKKPLVfypkdkdtpgctleaccGVSGDshrfvskfq    |
| 260 | 116786006.gb   | ABK23968.1     | unknown                                                                 | Synechococcus sp. RCC307                           | LGKKPLVfypkdkdtpgctleaccGVSGDshrfvskfq    |
| 261 | 7366113.ref    | YP_303129.1    | alkyl hydroperoxide reductase/thiol specific antioxidant/ Mai allergen  | Ehrlichia canis str. Jake                          | PPKIVAVfypadeapcckleaccGVSGDshkdkfrakyr   |
| 262 | 72394254.gb    | AA268531.1     | alkyl hydroperoxide reductase/thiol specific antioxidant/ Mai allergen  | Ehrlichia canis str. Jake                          | PPKIVAVfypadeapcckleaccGVSGDshkdkfrakyr   |
| 263 | 209524266.ref  | YP_03272816.1  | alkyl hydroperoxide reductase/ Thiol specific antioxidant/ Mai allergen | Arthropia maxima CS-328                            | YFYPKDDITPGCTKEAGgvsksHDFNFKRKHNYmgiers   |
| 264 | 209524266.ref  | EDZ95662.1     | alkyl hydroperoxide reductase/ Thiol specific antioxidant/ Mai allergen | Arthropia maxima CS-328                            | YFYPKDDITPGCTKEAGgvsksHDFNFKRKHNYmgiers   |
| 265 | 208434092.gb   | YP_002265768.1 | bacterioferritin comigratory protein                                    | Helicobacter pylori G27                            | YFYPKNDITPGCTKEAGgvsksHDFNFKRKHNYmgiers   |
| 266 | 208432021.gb   | ACJ26892.1     | bacterioferritin comigratory protein                                    | Helicobacter pylori G27                            | YFYPKNDITPGCTKEAGgvsksHDFNFKRKHNYmgiers   |
| 267 | 60680706.ref   | YP_210850.1    | putative bacterioferritin comigratory protein                           | Bacteroides fragilis NCTC 9343                     | LLGINEKYpklfdipgctleaccGVSVShqkfkfaknn    |
| 268 | 60492140.emb   | CAH06903.1     | putative bacterioferritin comigratory protein                           | Bacteroides fragilis NCTC 9343                     | LLGINEKYpklfdipgctleaccGVSVShqkfkfaknn    |
| 269 | 33593743.ref   | NP_881387.1    | hypothetical protein BP2787                                             | Bordetella pertussis Tohamia 1                     | YFYPKNDITPGCTTESGvrsdSHENFKTKYEvrglrs     |

|          |          |             |                              |                 |                                                       |                                                                              |
|----------|----------|-------------|------------------------------|-----------------|-------------------------------------------------------|------------------------------------------------------------------------------|
| 33597064 | ref      | NP_884707.1 | hypothetical protein BPP2476 |                 | Bordetella parapertussis 12822                        |                                                                              |
| 33600908 | ref      | NP_888468.1 | hypothetical protein BB1923  |                 | Bordetella bronchiseptica RB50                        |                                                                              |
| 33663816 | emb      | CAE43060.1  | hypothetical protein         |                 | Bordetella pertussis Tohama 1                         |                                                                              |
| 33668515 | emb      | CAE37771.1  | hypothetical protein         |                 | Bordetella parapertussis                              |                                                                              |
| 238      | 0        | 205372595   | ref                          | YP_03225406.1   | Bordetella bronchiseptica RB50                        |                                                                              |
| 239      | 3.71E-13 | 163801821   | ref                          | YP_02195718.1   | Bacillus coahuilensis m4-4                            | YFYPKDMTPGCTTEACGvyspdSHEKFINKHdymgvvrs<br>SLGDFKGGKLYypkampiqtqaaGVSDIgdjhr |
| 240      | 3.81E-11 | 165282585   | ref                          | YP_001580297.1  | Vibrio campbelli AND4                                 | YFYPAAFTKGCITAEHgvsaDL PALDRAspsdkhven<br>SLGDFKGGKLYypkampiqtqaaGVSDIgdjhr  |
| 241      | 0        | 169349977   | ref                          | YP_001945605.1  | Burkholderia multivorans ATCC 17616                   |                                                                              |
| 242      | 0        | 160342714   | gb                           | ABX15800.1      | Burkholderia multivorans ATCC 17616                   |                                                                              |
| 243      | 0        | 189333999   | tbl                          | BA043069.1      | Burkholderia multivorans ATCC 17616                   |                                                                              |
| 244      | 0        | 15627132    | ref                          | NP_301395.1     | Burkholderia multivorans ATCC 17616                   |                                                                              |
| 245      | 0        | 2222710     | emb                          | CAB08905.1      | Mycobacterium leprae TN                               |                                                                              |
| 246      | 0        | 13092860    | emb                          | CAC29932.1      | Mycobacterium leprae                                  |                                                                              |
| 247      | 8.34E-15 | 152971345   | ref                          | YP_0013368454.1 | Klebsiella pneumoniae subsp. pneumoniae MGH 78578     | YFYPKAMTPGCTVQACgistsdIKLSRFAEKELydgjhr                                      |
| 248      | 0        | 15086194    | gb                           | ABR78224.1      | Klebsiella pneumoniae subsp. pneumoniae MGH 78578     |                                                                              |
| 249      | 2.83E-11 | 33860903    | ref                          | NP_892464.1     | Prochlorococcus marinus subsp. pastoris str. COMP1986 | QNGTKRSfykdkdtpgctievGVSNGshlatfankk                                         |
| 250      | 0        | 33633845    | emb                          | CAE18804.1      | Prochlorococcus marinus subsp. pastoris str. COMP1986 |                                                                              |
| 251      | 0        | 21283821    | ref                          | YP_002314737.1  | Prochlorococcus marinus subsp. pastoris str. COMP1986 |                                                                              |
| 252      | 0        | 21285987    | gb                           | ACJ32752.1      | Anoxybacillus flavithermus WK1                        | YFYPKDMTPGCTTEACGjpspdRHKKFIEKHRYmgjers                                      |
| 253      | 0        | 145224187   | ref                          | YP_001134865.1  | Anoxybacillus flavithermus WK1                        |                                                                              |
| 254      | 0        | 90415878    | ref                          | YP_01223811.1   | Mycobacterium gilvum PYR-GCK                          | GLLADfyparamtpgctkeacAVGATRVkqaadqkn                                         |
| 255      | 0        | 145216673   | gb                           | ABP46077.1      | Mycobacterium gilvum PYR-GCK                          |                                                                              |
| 256      | 0        | 90332252    | gb                           | EAS4749.1       | marine gamma proteobacterium HTCC2207                 | IPASDfSfyypkampiqtqaaGVSDIwfkedlqke                                          |
| 257      | 8.34E-15 | 218246467   | ref                          | YP_002371838.1  | marine gamma proteobacterium HTCC2207                 |                                                                              |
| 258      | 0        | 218768945   | gb                           | ACK65682.1      | Cyanotoxone sp. PCC 8801                              | DEGKTVSfyypkddtpgctkeagGVSDIwshkfkelyg                                       |
| 259      | 0        | 196156944   | gb                           | ACG66682.1      | Cyanotoxone sp. PCC 8801                              |                                                                              |
| 260      | 0        | 196112723   | gb                           | ACG66439.1      | Alteomonas macleodii 'Deep ecotype'                   | YFYPKAMTPGCTVQACgistspdRLPKFIEKENydgjhr                                      |
| 261      | 0        | 118476219   | ref                          | YP_893370.1     | Alteomonas macleodii 'Deep ecotype'                   |                                                                              |
| 262      | 0        | 118415444   | gb                           | AKB33863.1      | Bacillus thuringiensis str. Al Hakam                  | YFYPKDMTPGCTTEACsglglqekktGVSPDymgiers                                       |
| 263      | 0        | 123967918   | ref                          | YP_001008776.1  | Bacillus thuringiensis str. Al Hakam                  |                                                                              |
| 264      | 0        | 153208921   | ref                          | YP_01947140.1   | Prochlorococcus marinus str. AS9601                   | QNGVKRSfyypkddtpgctievGVSNGshlatfankk                                        |
| 265      | 0        | 153208921   | ref                          | YP_01947140.1   | Prochlorococcus marinus str. AS9601                   |                                                                              |
| 266      | 0        | 165923358   | ref                          | YP_02219695.1   | Coxiella burnetii MSU Goat Q177                       | LKGKKVfyypkddtpgctkeagGVSDIwshkfkelyg                                        |
| 267      | 0        | 120876642   | gb                           | EAX32266.1      | Coxiella burnetii RSA 334                             |                                                                              |
| 268      | 0        | 165916684   | gb                           | EDR35288.1      | Coxiella burnetii MSU Goat Q177                       |                                                                              |
| 269      | 0        | 167040492   | ref                          | YP_001663477.1  | Thermoanaerobacter sp. X514                           | YFYPKDMTPGCTKEAVgisdISHKKFIEKHFKnmgiers                                      |
| 270      | 0        | 166854732   | gb                           | ABY93141.1      | Thermoanaerobacter sp. X514                           |                                                                              |
| 271      | 0        | 712803591   | ref                          | YP_269882.1     | Thermoanaerobacter sp. X514                           |                                                                              |
| 272      | 0        | 711460990   | gb                           | AAZ26572.1      | Colwellia psychrotolerans 34H                         | YFYPKAMTPGCTVQACgistspdGLKKFMGKEYlqgksh                                      |
| 273      | 0        | 86133389    | ref                          | YP_0105198.1    | Colwellia psychrotolerans 34H                         |                                                                              |
| 274      | 0        | 85820282    | gb                           | EA041409.1      | Tenacibaculum sp. MED152                              | FFYPKASTPGCTTAEACgvyspdRQGNFINKNEYdgjhr                                      |
| 275      | 0        | 187934338   | ref                          | YP_001887500.1  | Polibaacter sp. MED152                                |                                                                              |
| 276      | 0        | 206967941   | ref                          | YP_03228897.1   | Glostridium botulinum B str. Eklund 17B               | YFYPKDMTPGCTTEACgistskshNRFISKFNvgiers                                       |
| 277      | 0        | 218238119   | ref                          | YP_002365319.1  | Glostridium botulinum B str. Eklund 17B               |                                                                              |
| 278      | 0        | 206738681   | gb                           | EDJ54008.1      | Bacillus cereus AH134                                 | YFYPKDMTPGCTTEACgyspdRHLKFKIEKHRYmgiers                                      |
| 279      | 0        | 218164076   | gb                           | ACK64068.1      | Bacillus cereus AH134                                 |                                                                              |
| 280      | 0        | 15609658    | ref                          | NP_217037.1     | Bacillus cereus B4264                                 | YFYPKDMTPGCTTEACgistskshNRFISKFNvgiers                                       |
| 281      | 0        | 15842053    | ref                          | NP_337090.1     | Mycobacterium tuberculosis H37Rv                      | YFYPAASTPGCTKQACgistspdKLAIFRDAQGvqgvvrs                                     |
| 282      | 0        | 121639404   | ref                          | YP_978628.1     | Mycobacterium tuberculosis CDC1551                    |                                                                              |
| 283      | 0        | 148662358   | ref                          | YP_001283881.1  | Mycobacterium bovis BCG str. Pasteur 1173P2           |                                                                              |
| 284      | 0        | 148623717   | ref                          | YP_001283881.1  | Mycobacterium bovis BCG str. Pasteur 1173P2           |                                                                              |
| 285      | 0        | 167967319   | ref                          | YP_02549596.1   | Mycobacterium tuberculosis H37Ra                      |                                                                              |
| 286      | 0        | 194544696   | ref                          | YP_002079725.1  | Mycobacterium tuberculosis H37Ra                      |                                                                              |
| 287      | 0        | 197737543   | ref                          | YP_002158860.1  | Mycobacterium tuberculosis C                          |                                                                              |
| 288      | 0        | 215404459   | ref                          | YP_03416840.1   | Mycobacterium tuberculosis str. Haarlem               |                                                                              |
| 289      | 0        | 215412282   | ref                          | YP_03421052.1   | Mycobacterium tuberculosis 02_1987                    |                                                                              |
| 290      | 0        | 215427908   | ref                          | YP_03425827.1   | Mycobacterium tuberculosis 192                        |                                                                              |
| 291      | 0        | 215441466   | ref                          | YP_03429385.1   | Mycobacterium tuberculosis EAS054                     |                                                                              |
| 292      | 0        | 215446773   | ref                          | YP_03433525.1   | Mycobacterium tuberculosis T85                        |                                                                              |
| 293      | 0        | 218754253   | ref                          | YP_03533049.1   | Mycobacterium tuberculosis GM_1503                    |                                                                              |
| 294      | 0        | 2791423     | emb                          | CAA18017.1      | Mycobacterium tuberculosis H37Rv                      |                                                                              |
| 295      | 0        | 13882332    | gb                           | AAK46904.1      | Mycobacterium tuberculosis CDC1551                    |                                                                              |
| 296      | 0        | 121494052   | emb                          | CAL72530.1      | Mycobacterium bovis BCG str. Pasteur 1173P2           |                                                                              |
| 297      | 0        | 124601703   | gb                           | EAY60713.1      | Mycobacterium tuberculosis C                          |                                                                              |
| 298      | 0        | 134152238   | gb                           | EBAA44283.1     | Mycobacterium tuberculosis str. Haarlem               |                                                                              |
| 299      | 0        | 148506510   | gb                           | EBA074319.1     | Mycobacterium tuberculosis H37Ra                      |                                                                              |
| 300      | 0        | 148722244   | gb                           | ABR08869.1      | Mycobacterium tuberculosis F11                        |                                                                              |
| 258      | 0        | 160901625   | ref                          | YP_0015617206.1 | Petrologia mobilis S195                               | YFYPKDMTPGCTKEAVgyspdKHLANFKENKdmgvrvrs                                      |

|     |                |                |                                                                         |                                                       |                                            |
|-----|----------------|----------------|-------------------------------------------------------------------------|-------------------------------------------------------|--------------------------------------------|
| 259 | 160359269.gb   | ABX30883.1     | alkyl hydroperoxide reductase/ Thiol specific antioxidant/ Mal allergen | Petrotoga mobilis SJ95                                | YFYPKDNTPGCTLEAKAGSPASQSHQKFISSQSHlgllirs  |
| 0   | 15611194.ref   | NP_222845.1    | bacterioferritin comigratory protein                                    | Helicobacter pylori J99                               |                                            |
|     | 7387552.gb     | O92MUL.1       | BCP_HELPJ RecName: Full=Putative peroxidoredoxin bcp. AltName: F        | Helicobacter pylori J99                               |                                            |
| 260 | 41594631.gb    | AA005701.1     | BACTERIOFERRITIN COMIGRATORY PROTEIN                                    | Helicobacter pylori J99                               |                                            |
|     | 33237070.gb    | NP_874487.1    | peroxidoredoxin                                                         | Prochlorococcus marinus subsp. marinus str. CCMP1375  | YFYPKDDTTPGCTKEACGlskklHSHKFINKYOlkvkaas   |
| 261 | 1194907741.ref | ZP_01623106.1  | bacterioferritin comigratory protein                                    | Lynghya sp. PCC 8106                                  | SLSDFRGPVYpyyrdntpgtckeadLVAEYRSyvgjre     |
| 262 | 1194537568.gb  | EAW94916.1     | bacterioferritin comigratory protein                                    | Lynghya sp. PCC 8106                                  |                                            |
| 263 | 5.38E-13       | 6044220.gb     | putative bacterioferritin comigratory protein                           | Saccharophagus degradans 2-40                         | YFYPKAMITPGCTVQVQAGcjspsdRLKFKFKQKEmgllrt  |
| 264 | 2.08E-13       | 2184339870.ref | MCP1 gene product                                                       | Saccharophagus degradans 2-40                         | 0                                          |
| 265 | 6.53E-11       | 1637386644.ref | alkyl hydroperoxide reductase/ Thiol specific antioxidant/ Mal allergen | Cyanotheca sp. PCC 7424                               | YFYPQDFTPGCTLEARDIakleaknaGVASADrpahsa     |
|     | 1637386644.ref | ZP_021444033.1 | alkyl hydroperoxide reductase/ Thiol specific antioxidant/ Mal allergen | Cyanotheca sp. PCC 7424                               |                                            |
|     | 1637472759.ref | ZP_02160124.1  | Redoxin                                                                 | Phaeobacter gallaeciensis BS107                       | FFYPRDDTTPGCTKEShlnqafatagagaSISKdhuglers  |
|     | 161383994.gb   | EDQ00837.8     | AtPc/TSA family protein                                                 | Phaeobacter gallaeciensis 2. 10                       |                                            |
| 266 | 0              | 150025635.ref  | Redoxin                                                                 | Phaeobacter gallaeciensis BS107                       |                                            |
|     | 149772376.emb  | CAL43866.1     | Probable peroxidoredoxin                                                | Flavobacterium psychrophilum J1P02/86                 | YFYPKDEITPGCTKQACgjsdsSHKKFAQNHKInasjhs    |
| 267 | 7.02E-14       | 196230542.ref  | alkyl hydroperoxide reductase/ Thiol specific antioxidant/ Mal allergen | Flavobacterium psychrophilum J1P02/86                 |                                            |
|     | 196225472.gb   | EDY19980.1     | alkyl hydroperoxide reductase/ Thiol specific antioxidant/ Mal allergen | Chthonobacter flavus Ellin428                         | LLATLVSyfyphkadtptgckagcGVSEDaqlafantyn    |
| 268 | 4.65E-11       | 18312243.ref   | antioxidant protein, putative                                           | Chthonobacter flavus Ellin428                         | YFFPKAFITGQCTRETlqyvtidTLRKFADRYGqlgllrt   |
|     | 18159685.gb    | AA163092.1     | antioxidant protein, putative                                           | Pyrobaculum aerophilum str. IM2                       |                                            |
| 269 | 0              | 1962333316.ref | alkyl hydroperoxide reductase/ Thiol specific antioxidant/ Mal allergen | Chthonobacter flavus Ellin428                         | YFYPKADITPGCTKEACGjssedAQKKFRDKYHspgllhva  |
|     | 196222621.gb   | EDY17146.1     | alkyl hydroperoxide reductase/ Thiol specific antioxidant/ Mal allergen | Chthonobacter flavus Ellin428                         |                                            |
| 270 | 4.14E-13       | 126946002.ref  | alkyl hydroperoxide reductase/ Thiol specific antioxidant/ Mal allergen | Pyrobaculum calidifontis JCM 11548                    | LFPPGAFITSVCTKELCaisvdSLSKEFKKRNRawllap    |
|     | 126946002.ref  | YP_001056299.1 | alkyl hydroperoxide reductase/ Thiol specific antioxidant/ Mal allergen | Pyrobaculum calidifontis JCM 11548                    |                                            |
| 271 | 0              | 118619048.ref  | bacterioferritin comigratory protein Bcp                                | Mycobacterium ulcerans Agy99                          | YFYPAASTPGCTKQACgjspskKLAKFRDAEGVtgvirs    |
|     | 183983928.ref  | YP_001852219.1 | bacterioferritin comigratory protein Bcp                                | Mycobacterium marinum M                               |                                            |
| 272 | 0              | 46199237.ref   | bacterioferritin comigratory protein Bcp                                | Mycobacterium marinum M                               |                                            |
|     | 46199662.gb    | AA581277.1     | bacterioferritin comigratory protein                                    | Thermus thermophilus HB27                             | YFYPKDDITPGCTKEACGjvsadSHKRF AEKYGVegvllrq |
| 273 | 4.87E-15       | 65819397.ref   | bacterioferritin comigratory protein                                    | Thermus thermophilus HB27                             |                                            |
|     | 65819397.gb    | EA0405656.1    | bacterioferritin comigratory protein-like                               | Celiulophaga sp. MED134                               | YFYPKFNFTPGCTAQACGjsadSHKRRFRRAKHngknrr    |
| 274 | 8.06E-12       | 196256139.ref  | alkyl hydroperoxide reductase/ Thiol specific antioxidant/ Mal allergen | Dokdonia donghaensis MED134                           | YFYPKDFITSGCTLEARldklyaeaknaGVSRDpnhlha    |
|     | 196203319.gb   | EDX98136.1     | alkyl hydroperoxide reductase/ Thiol specific antioxidant/ Mal allergen | Cyanotheca sp. PCC 7822                               |                                            |
| 275 | 1.92E-09       | 114869856.ref  | redoxin domain-containing protein                                       | Maricaulis maris MCS10                                | YLYPKDDITPGCTTQALGlskryMGIQRSSkghvdevl     |
|     | 114340318.gb   | AB165598.1     | Redoxin domain protein                                                  | Maricaulis maris MCS10                                |                                            |
| 276 | 4.36E-15       | 15927437.ref   | bacterioferritin comigratory protein                                    | Staphylococcus aureus subsp. aureus Mu50              | LKGGKKAlyfyrpdmptctearcGISGDhnhqntekthg    |
|     | 21283532.ref   | NP_646820.1    | hypothetical protein MV11803                                            | Staphylococcus aureus subsp. aureus MW2               |                                            |
|     | 57650653.ref   | YP_186746.1    | bacterioferritin comigratory protein                                    | Staphylococcus aureus subsp. aureus COL               |                                            |
|     | 88195687.ref   | YP_500496.1    | bacterioferritin comigratory protein                                    | Staphylococcus aureus subsp. aureus USA300            |                                            |
|     | 156980179.ref  | YP_001442438.1 | hypothetical protein SAUHSC_01999                                       | Staphylococcus aureus subsp. aureus NCTC 8325         |                                            |
|     | 161510081.ref  | YP_001576740.1 | peroxidoredoxin                                                         | Staphylococcus aureus subsp. aureus Mu3               |                                            |
|     | 168727366.ref  | ZP_02759633.1  | possible peroxidoredoxin                                                | Staphylococcus aureus subsp. aureus USA300_TCH1516    |                                            |
|     | 13701666.dbj   | BAB42949.1     | conserved hypothetical protein                                          | Staphylococcus aureus subsp. aureus N315              |                                            |
|     | 14247635.dbj   | BAB58025.1     | similar to bacterioferritin comigratory protein                         | Staphylococcus aureus subsp. aureus Mu50              |                                            |
|     | 21204973.dbj   | BAB95668.1     | conserved hypothetical protein                                          | Staphylococcus aureus subsp. aureus MW2               |                                            |
|     | 57284839.gb    | AAW96933.1     | bacterioferritin comigratory protein                                    | Staphylococcus aureus subsp. aureus COL               |                                            |
|     | 87127013.gb    | ABD21527.1     | bacterioferritin comigratory protein                                    | Staphylococcus aureus subsp. aureus USA300_FPR3757    |                                            |
|     | 87203245.gb    | ABD31095.1     | conserved hypothetical protein                                          | Staphylococcus aureus subsp. aureus NCTC_8325         |                                            |
|     | 156722314.dbj  | BAF78731.1     | conserved hypothetical protein                                          | Staphylococcus aureus subsp. aureus Mu3               |                                            |
|     | 160368890.gb   | ABX29861.1     | possible peroxidoredoxin                                                | Staphylococcus aureus subsp. aureus USA300_TCH1516    |                                            |
| 277 | 1.36E-11       | 70606900.ref   | peroxidoredoxin                                                         | Sulfolobus acidocaldarius DSM 639                     | AFYPGAFTSVCTKEMCGjlsvdsNKAFKQNKyvisks      |
|     | 68667548.gb    | AAV80477.1     | peroxidoredoxin                                                         | Sulfolobus acidocaldarius DSM 639                     |                                            |
| 278 | 4.87E-12       | 87201167.ref   | alkyl hydroperoxide reductase/ Thiol specific antioxidant/ Mal allergen | Novosphingobium aromaticivorans DSM 12444             | FFYPKDDTTPGCTTENKvskdKHLKFAEKHAadgktaq     |
|     | 87136848.gb    | ABD27590.1     | alkyl hydroperoxide reductase/ Thiol specific antioxidant/ Mal allergen | Novosphingobium aromaticivorans DSM 12444             |                                            |
| 279 | 2.13E-15       | 124025683.ref  | alkyl hydroperoxide reductase/ Thiol specific antioxidant/ Mal allergen | Prochlorococcus marinus str. NATL-1A                  | LYASINSSldfkskwllyfYPKDFSSGCTLEAKGlsad     |
|     | 1239607531.gb  | ABM75534.1     | alkyl hydroperoxide reductase/ Thiol specific antioxidant/ Mal allergen | Prochlorococcus marinus str. NATL-1A                  |                                            |
| 280 | 0              | 1893463016.gb  | alkyl hydroperoxide reductase/ Thiol specific antioxidant/ Mal allergen | Chlorobium limicola DSM 245                           | PTADYfypkddltpgckeadLGVSDSsktsktaekyd      |
|     | 189340453.gb   | ACD89866.1     | alkyl hydroperoxide reductase/ Thiol specific antioxidant/ Mal allergen | Chlorobium limicola DSM 245                           |                                            |
| 281 | 3.55E-12       | 163759547.ref  | bacterioferritin comigratory protein                                    | Hoeflea phototrophica DFL-43                          | SPAIHlMlyfypkddltpgckeadLGM5ADktdlflaktln  |
|     | 162283144.gb   | EDQ30340.1     | bacterioferritin comigratory protein                                    | Hoeflea phototrophica DFL-43                          |                                            |
| 282 | 1.30E-17       | 217966881.ref  | alkyl hydroperoxide reductase/ Thiol specific antioxidant/ Mal allergen | Dicyleoglossum turgidum DSM 6724                      | QNGKEVSYfypkdmitsgctkeavGISKDskhkaekyn     |
|     | 2173335916.gb  | ACK41709.1     | alkyl hydroperoxide reductase/ Thiol specific antioxidant/ Mal allergen | Dicyleoglossum turgidum DSM 6724                      |                                            |
| 283 | 7.28E-10       | 1714632019.ref | alkyl hydroperoxide reductase/ Thiol specific antioxidant/ Mal allergen | Polynucleobacter necessarius subsp. necessarius STIR1 | AKGKKLlyfypkdmtpgctaeagGVSRDshdnrskle      |
|     | 17192747.gb    | ACB43708.1     | alkyl hydroperoxide reductase/ Thiol specific antioxidant/ Mal allergen | Polynucleobacter necessarius subsp. necessarius STIR1 |                                            |
| 284 | 1.77E-12       | 163746645.ref  | AtPc/TSA family protein                                                 | Oceanibulbus indoliflex HEL-45                        | FFYPRDDTTPGCTKESlgjstdrkKHDRFASKHAatgktaq  |

|     |          |                |                |                                                                         |                                               |                                  |                    |
|-----|----------|----------------|----------------|-------------------------------------------------------------------------|-----------------------------------------------|----------------------------------|--------------------|
| 285 | 1.95E-13 | 161379759 gb   | ED004171.1     | AhpC/TSA family protein.                                                | Oocamibulus indolifex HEL-45                  | YFYPKDDITSGCTTQAQGVSPD           | SHQKFRKTRHNYGILRS  |
| 286 | 5.42E-14 | 1567241319 ref | YP_001431448.1 | alkyl hydroperoxide reductase/ Thiol specific antioxidant/ Mal allergen | Roseiflexus castenholzii DSM 13941            | YFYPKDDITSGCTTQAQGVSPD           | SHQKFRKTRHNYGILRS  |
| 287 | 2.71E-15 | 1842000298 gb  | EDX95119.1     | alkyl hydroperoxide reductase/ Thiol specific antioxidant/ Mal allergen | Roseiflexus castenholzii DSM 13941            | LKVGDRAYYPKDDITSGCTTQAQGVSPD     | SHQKFRKTRHNYGILRS  |
| 288 | 5.66E-11 | 183580894 dbj  | BA629365.1     | alkyl hydroperoxide reductase/ Thiol specific antioxidant/ Mal allergen | Cyanothoe sp. PCC 7822                        | YFYPRAATPGCTTAQAQGVSPD           | ARFSAEHDVEGLRS     |
| 289 | 1.96E-16 | 6824866 ref    | YP_001173281.1 | hydroperoxide peroxidase                                                | Kocuria rhizophila DC2201                     | YFYPKDNTPGCTTEGQIHQALFAAN        | GVSRDYGVDRS        |
| 290 | 2.93E-13 | 58696630 gb    | AA187313.1     | bacterioferritin comigratory protein                                    | Pseudomonas stutzeri A1501                    | YFYPKALTPGCTTQAQGVSPD            | KAQIEKKAQYDGLNRI   |
| 291 | 2.31E-11 | 86138783 ref   | YP_01057355.1  | thioredoxin-dependent thiol peroxidase                                  | Haemophilus influenzae 86-028NP               | YFYPKDNTPGCTTQAQGVSPD            | SHGKFKITKQESIGERS  |
| 292 | 1.03E-13 | 70952012 ref   | XP_745203.1    | bacterioferritin comigratory protein                                    | Haemophilus influenzae 86-028NP               | YFYPKALTPGCTTQAQGVSPD            | KAQIEKKAQYDGLNRI   |
| 293 | 0        | 146312617 ref  | YP_001177691.1 | thioredoxin-dependent thiol peroxidase                                  | Helobacillus mobilis                          | SLSSEFEDKKNYYPKDDITSGCTTQAQGVSPD | MEAGVSKDIPISLVS    |
| 294 | 2.16E-10 | 88811529 ref   | YP_01126784.1  | alkyl hydroperoxide reductase/ Thiol specific antioxidant/ Mal allergen | Wobacchia endosymbiont of Drosophila simulans | FFYPRDDITPGCTKESIHQIFADTAG       | GISKDHVIGLRS       |
| 295 | 2.81E-10 | 88791418 gb    | EAR22530.1     | Peroxioredoxin                                                          | Roseobacter sp. MED193                        | TLKAEIEKHNIHPKANIPGCTEQAK        | GLSADGDIILRS       |
| 296 | 7.39E-13 | 783664180 gb   | ABR42145.1     | alkyl hydroperoxide reductase/ Thiol specific antioxidant/ Mal allergen | Plasmodium chabaudi chabaudi                  | YFYPKAMTPGCTVQAQGVSPD            | KLSRFAEKELVGLNRI   |
| 297 | 3.33E-13 | 74316024 ref   | YP_315764.1    | peroxiredoxin-like protein                                              | Enterobacter sp. 638                          | YFYPKADITPGCTQEGAGVSRD           | AAQNFKDKYGAIGVRS   |
| 298 | 2.00E-13 | 50084066 ref   | YP_045576.1    | bacterioferritin comigratory protein                                    | Nitrocoocus mobilis Nb-231                    | YFYPKDDITPGCTTEGQGVSKDK          | HENFKSFDFYMGILRS   |
| 299 | 6.28E-12 | 118894385 ref  | ED059529.1     | peroxiredoxin                                                           | Thiomicrospira crunogena XCL-2                | YFYPKDDITPGCTTQAQGVSPD           | KLHFKVDFKYSLIAD    |
| 300 | 6.50E-14 | 149910480 ref  | YP_01899120.1  | Putative bacterioferritin comigratory protein                           | Pelotictyon luteolum DSM 273                  | AFYPAAFVTSVCTKEMCGISVSD          | SNKFAKQCNKYVLAIKRS |
| 301 | 0        | 1603934704 ref | YP_02082090.1  | hypothetical protein CLOLEP_03579                                       | Sulfolobus solfataricus P2                    | YFYPKDDITPGCTTQAQGVSPD           | INFSLLSPGKIMFGKEF  |
| 302 | 0        | 166023667 ref  | EDR48424.1     | hypothetical protein DORFOR_00166                                       | Thiobacillus denitrificans ATCC 25259         | EVGKIPAYYPKDDITSGCTTQAQGVSPD     | SHKFKFKKEYGAGGILIA |
| 303 | 0        | 138894163 ref  | YP_001124616.1 | bacterioferritin comigratory protein                                    | Acinetobacter sp. ADP1                        | YFYPKDDITSGCTTQAQGVSPD           | SHKFKFKKEYGAGGILIA |
| 304 | 0        | 196250606 ref  | AB064871.1     | alkyl hydroperoxide reductase/ Thiol specific antioxidant/ Mal allergen | Magnetospirillum magnetium AMB-1              | GIGSRRLYYPKDDITSGCTTQAQGVSPD     | SHKFKFKKEYGAGGILIA |
| 305 | 0        | 166023667 ref  | EDR48424.1     | hypothetical protein DORFOR_00166                                       | Magnetospirillum magnetium AMB-1              | GIGSRRLYYPKDDITSGCTTQAQGVSPD     | SHKFKFKKEYGAGGILIA |
| 306 | 0        | 138894163 ref  | YP_001124616.1 | bacterioferritin comigratory protein                                    | Clostridium leptum DSM 753                    | YFYPKDDITSGCTTQAQGVSPD           | SHKFKFKKEYGAGGILIA |
| 307 | 0        | 196250606 ref  | AB064871.1     | alkyl hydroperoxide reductase/ Thiol specific antioxidant/ Mal allergen | Clostridium leptum DSM 753                    | YFYPKDDITSGCTTQAQGVSPD           | SHKFKFKKEYGAGGILIA |
| 308 | 0        | 138894163 ref  | YP_001124616.1 | bacterioferritin comigratory protein                                    | Methylophilales bacterium HTCC2181            | YFYPKDDITSGCTTQAQGVSPD           | SHKFKFKKEYGAGGILIA |
| 309 | 0        | 196250606 ref  | AB064871.1     | alkyl hydroperoxide reductase/ Thiol specific antioxidant/ Mal allergen | Methylophilales bacterium HTCC2181            | YFYPKDDITSGCTTQAQGVSPD           | SHKFKFKKEYGAGGILIA |
| 310 | 0        | 138894163 ref  | YP_001124616.1 | bacterioferritin comigratory protein                                    | Moritella sp. PE36                            | YFYPKDDITSGCTTQAQGVSPD           | SHKFKFKKEYGAGGILIA |
| 311 | 0        | 196250606 ref  | AB064871.1     | alkyl hydroperoxide reductase/ Thiol specific antioxidant/ Mal allergen | Dorea formicigenans ATCC 27755                | EVGKIPAYYPKDDITSGCTTQAQGVSPD     | SHKFKFKKEYGAGGILIA |
| 312 | 0        | 138894163 ref  | YP_001124616.1 | bacterioferritin comigratory protein                                    | Dorea formicigenans ATCC 27755                | EVGKIPAYYPKDDITSGCTTQAQGVSPD     | SHKFKFKKEYGAGGILIA |
| 313 | 0        | 196250606 ref  | AB064871.1     | alkyl hydroperoxide reductase/ Thiol specific antioxidant/ Mal allergen | Penicillium marneffei ATCC 18224              | VQKKAATAKTIPAKSAIFYPRAST         | PGCTTKQAASGLID     |
| 314 | 0        | 138894163 ref  | YP_001124616.1 | bacterioferritin comigratory protein                                    | Penicillium marneffei ATCC 18224              | VQKKAATAKTIPAKSAIFYPRAST         | PGCTTKQAASGLID     |
| 315 | 0        | 196250606 ref  | AB064871.1     | alkyl hydroperoxide reductase/ Thiol specific antioxidant/ Mal allergen | Geobacillus sp. G11MC16                       | YFYPKDDITSGCTTQAQGVSPD           | SHKFKFKKEYGAGGILIA |
| 316 | 0        | 138894163 ref  | YP_001124616.1 | bacterioferritin comigratory protein                                    | Geobacillus sp. G11MC16                       | YFYPKDDITSGCTTQAQGVSPD           | SHKFKFKKEYGAGGILIA |
| 317 | 0        | 196250606 ref  | AB064871.1     | alkyl hydroperoxide reductase/ Thiol specific antioxidant/ Mal allergen | Arthroabacter sp. FB24                        | YFYPKDDITSGCTTQAQGVSPD           | SHKFKFKKEYGAGGILIA |
| 318 | 0        | 138894163 ref  | YP_001124616.1 | bacterioferritin comigratory protein                                    | Arthroabacter sp. FB24                        | YFYPKDDITSGCTTQAQGVSPD           | SHKFKFKKEYGAGGILIA |
| 319 | 0        | 196250606 ref  | AB064871.1     | alkyl hydroperoxide reductase/ Thiol specific antioxidant/ Mal allergen | Octadecabacter antarcticus 238                | YFYPKDDITSGCTTQAQGVSPD           | SHKFKFKKEYGAGGILIA |
| 320 | 0        | 138894163 ref  | YP_001124616.1 | bacterioferritin comigratory protein                                    | Cyanothoe sp. PCC 7822                        | YFYPKDDITSGCTTQAQGVSPD           | SHKFKFKKEYGAGGILIA |
| 321 | 0        | 196250606 ref  | AB064871.1     | alkyl hydroperoxide reductase/ Thiol specific antioxidant/ Mal allergen | Cyanothoe sp. PCC 7822                        | YFYPKDDITSGCTTQAQGVSPD           | SHKFKFKKEYGAGGILIA |
| 322 | 0        | 138894163 ref  | YP_001124616.1 | bacterioferritin comigratory protein                                    | Pyrobaculum arsenaticum DSM 13514             | YFYPKDDITSGCTTQAQGVSPD           | SHKFKFKKEYGAGGILIA |
| 323 | 0        | 196250606 ref  | AB064871.1     | alkyl hydroperoxide reductase/ Thiol specific antioxidant/ Mal allergen | Pyrobaculum arsenaticum DSM 13514             | YFYPKDDITSGCTTQAQGVSPD           | SHKFKFKKEYGAGGILIA |
| 324 | 0        | 138894163 ref  | YP_001124616.1 | bacterioferritin comigratory protein                                    | Methanospirillum hungatei JF-1                | YFYPKDDITSGCTTQAQGVSPD           | SHKFKFKKEYGAGGILIA |
| 325 | 0        | 196250606 ref  | AB064871.1     | alkyl hydroperoxide reductase/ Thiol specific antioxidant/ Mal allergen | Methanospirillum hungatei JF-1                | YFYPKDDITSGCTTQAQGVSPD           | SHKFKFKKEYGAGGILIA |
| 326 | 0        | 138894163 ref  | YP_001124616.1 | bacterioferritin comigratory protein                                    | Plasmodium falciparum 3D7                     | YFYPKDDITSGCTTQAQGVSPD           | SHKFKFKKEYGAGGILIA |
| 327 | 0        | 196250606 ref  | AB064871.1     | alkyl hydroperoxide reductase/ Thiol specific antioxidant/ Mal allergen | Plasmodium falciparum 3D7                     | YFYPKDDITSGCTTQAQGVSPD           | SHKFKFKKEYGAGGILIA |
| 328 | 0        | 138894163 ref  | YP_001124616.1 | bacterioferritin comigratory protein                                    | Prosthecochloris aestuarii DSM 271            | YFYPKDDITSGCTTQAQGVSPD           | SHKFKFKKEYGAGGILIA |
| 329 | 0        | 196250606 ref  | AB064871.1     | alkyl hydroperoxide reductase/ Thiol specific antioxidant/ Mal allergen | Prosthecochloris aestuarii DSM 271            | YFYPKDDITSGCTTQAQGVSPD           | SHKFKFKKEYGAGGILIA |
| 330 | 0        | 138894163 ref  | YP_001124616.1 | bacterioferritin comigratory protein                                    | Burkholderia thailandensis E264               | YFYPKDDITSGCTTQAQGVSPD           | SHKFKFKKEYGAGGILIA |
| 331 | 0        | 196250606 ref  | AB064871.1     | alkyl hydroperoxide reductase/ Thiol specific antioxidant/ Mal allergen | Burkholderia thailandensis TXDOH              | YFYPKDDITSGCTTQAQGVSPD           | SHKFKFKKEYGAGGILIA |
| 332 | 0        | 138894163 ref  | YP_001124616.1 | bacterioferritin comigratory protein                                    | Burkholderia thailandensis B4                 | YFYPKDDITSGCTTQAQGVSPD           | SHKFKFKKEYGAGGILIA |
| 333 | 0        | 196250606 ref  | AB064871.1     | alkyl hydroperoxide reductase/ Thiol specific antioxidant/ Mal allergen | Burkholderia thailandensis E264               | YFYPKDDITSGCTTQAQGVSPD           | SHKFKFKKEYGAGGILIA |
| 334 | 0        | 138894163 ref  | YP_001124616.1 | bacterioferritin comigratory protein                                    | Ralstonia pickettii 12J                       | YFYPKDDITSGCTTQAQGVSPD           | SHKFKFKKEYGAGGILIA |
| 335 | 0        | 196250606 ref  | AB064871.1     | alkyl hydroperoxide reductase/ Thiol specific antioxidant/ Mal allergen | Ralstonia pickettii 12J                       | YFYPKDDITSGCTTQAQGVSPD           | SHKFKFKKEYGAGGILIA |
| 336 | 0        | 138894163 ref  | YP_001124616.1 | bacterioferritin comigratory protein                                    | Saccharomyces cerevisiae                      | YFYPKDDITSGCTTQAQGVSPD           | SHKFKFKKEYGAGGILIA |
| 337 | 0        | 196250606 ref  | AB064871.1     | alkyl hydroperoxide reductase/ Thiol specific antioxidant/ Mal allergen | Stappia aggregata IAM 12614                   | YFYPKDDITSGCTTQAQGVSPD           | SHKFKFKKEYGAGGILIA |
| 338 | 0        | 138894163 ref  | YP_001124616.1 | bacterioferritin comigratory protein                                    | Stappia aggregata IAM 12614                   | YFYPKDDITSGCTTQAQGVSPD           | SHKFKFKKEYGAGGILIA |
| 339 | 0        | 196250606 ref  | AB064871.1     | alkyl hydroperoxide reductase/ Thiol specific antioxidant/ Mal allergen | Synechococcus sp. WH 7805                     | YFYPKDDITSGCTTQAQGVSPD           | SHKFKFKKEYGAGGILIA |
| 340 | 0        | 138894163 ref  | YP_001124616.1 | bacterioferritin comigratory protein                                    | Synechococcus sp. WH 7805                     | YFYPKDDITSGCTTQAQGVSPD           | SHKFKFKKEYGAGGILIA |

|     |          |                |                |                                                                         |                                                     |                                            |
|-----|----------|----------------|----------------|-------------------------------------------------------------------------|-----------------------------------------------------|--------------------------------------------|
| 321 | 9.92E-12 | 887815701.gb   | EAR18727.1     | alkyl hydroperoxide reductase/ Thiol specific antioxidant/ Mal allergen | Synechococcus sp. WH 7805                           | YFYPKDNTPGCTNESIGSRSHQNFKAQKLEVrgiers      |
|     |          | 344982701.ref  | NP_902485.1    | bacterioferritin comigratory protein                                    | Chromobacterium violaceum ATCC 12472                |                                            |
|     |          | 34104124.gb    | AA060483.1     | bacterioferritin comigratory protein                                    | Chromobacterium violaceum ATCC 12472                |                                            |
| 322 | 2.94E-18 | 293500191.ref  | NP_813522.1    | putative bacterioferritin co-migratory protein                          | Bacteroides thetaiotaomicron VPI-5482               | YFYPKDSITSGCTAQAGyvsvdSHQKFKIDKKNNeeglier  |
|     |          | 29341930.gb    | AA079716.1     | putative bacterioferritin co-migratory protein                          | Bacteroides thetaiotaomicron VPI-5482               |                                            |
| 323 | 5.26E-17 | 1901501721.ref | YP_001968697.1 | putative peroxiredoxin Bcp                                              | Actinobacillus pleuropneumoniae serovar 7 str. AP76 | YFYPKALTPGCTTQAAGyvspKLAQFAEAKKAYdgihri    |
|     |          | 189915303.gb   | ACE61555.1     | putative peroxiredoxin Bcp                                              | Actinobacillus pleuropneumoniae serovar 7 str. AP76 |                                            |
| 324 | 1.73E-13 | 1542481151.ref | YP_001419073.1 | alkyl hydroperoxide reductase/ Thiol specific antioxidant/ Mal allergen | Xanthobacter autotrophicus Py2                      | YFYPKANTTGC7KEAlyvsaaQDKFKAKYDvmjiera      |
|     |          | 154162200.gb   | AB556946.1     | alkyl hydroperoxide reductase/ Thiol specific antioxidant/ Mal allergen | Xanthobacter autotrophicus Py2                      |                                            |
| 325 | 5.29E-15 | 209524888.ref  | ZP_03273444.1  | alkyl hydroperoxide reductase/ Thiol specific antioxidant/ Mal allergen | Xanthobacter autotrophicus Py2                      | LSAGTKAylypkdtdpgctkeagVSTDshkfkfkyg       |
|     |          | 209494777.gb   | ED7295086.1    | alkyl hydroperoxide reductase/ Thiol specific antioxidant/ Mal allergen | Xanthobacter autotrophicus Py2                      |                                            |
| 326 | 2.66E-13 | 425210301.ref  | NP_966995.1    | alkyl hydroperoxide reductase/ Thiol specific antioxidant/ Mal allergen | Arthrospira maxima CS-328                           | SLSEFFDKKNlypkdtdpgctmeakGVSKDlpisvs       |
|     |          | 42410821.gb    | AA514929.1     | bacterioferritin comigratory protein                                    | Wobaschia endosymbiont of Drosophila melanogaster   |                                            |
| 327 | 0        | 154488608.ref  | ZP_02029457.1  | hypothetical protein BIFADO_01915                                       | Bifidobacterium adolescentis L2-32                  | TLRSALRGNlyfyaamtgtpctteacGISKDYegvirs     |
|     |          | 154082745.gb   | ED1N81790.1    | hypothetical protein BIFADO_01915                                       | Bifidobacterium adolescentis L2-32                  |                                            |
| 328 | 4.71E-10 | 167969478.ref  | ZP_02362352.1  | antioxidant. AhpC/TSA family protein                                    | Burkholderia oklahomensis C8786                     | YFYPAAFTTGC7TIEAlyvsadDAKRIREkpaiksnr      |
|     |          | 1712764261.ref | ZP_00682703.1  | alkyl hydroperoxide reductase/ Thiol specific antioxidant/ Mal allergen | Xylella fastidiosa Dixon                            | YFYPKDNTPGCTTEGLyvsrdSHDSFCAKQGlgiers      |
| 329 | 2.41E-11 | 719005051.ref  | ZP_00682635.1  | alkyl hydroperoxide reductase/ Thiol specific antioxidant/ Mal allergen | Xylella fastidiosa Dixon                            |                                            |
|     |          | 1707309741.ref | YP_001776407.1 | bacterioferritin comigratory protein                                    | Xylella fastidiosa M12                              |                                            |
|     |          | 71162742.gb    | EA012468.1     | alkyl hydroperoxide reductase/ Thiol specific antioxidant/ Mal allergen | Xylella fastidiosa Dixon                            |                                            |
|     |          | 167965677.gb   | ACA12777.1     | bacterioferritin comigratory protein                                    | Xylella fastidiosa M12                              |                                            |
| 330 | 8.33E-11 | 172300481.ref  | NP_486596.1    | bacterioferritin comigratory protein                                    | Nostoc sp. PCC 7120                                 | YFYPKDFTSGCTIEARyvsadPQGLIREkrgkstas       |
|     |          | 171316481.dbl  | BA874255.1     | bacterioferritin comigratory protein                                    | Nostoc sp. PCC 7120                                 |                                            |
| 331 | 0        | 464457251.ref  | YP_007090.1    | putative bacterioferritin comigratory protein (BCP)                     | Candidatus Protoclamydia amoebophila UWE25          | LPVSVRostkafdeeqnYFYPKDDTTPGCTLQAQgispd    |
|     |          | 463993661.emb  | CAT22815.1     | putative bacterioferritin comigratory protein (BCP)                     | Candidatus Protoclamydia amoebophila UWE25          |                                            |
| 332 | 1.40E-17 | 1184829481.gb  | ABK93386.1     | unknown                                                                 | Populus trichocarpa                                 | LSKSSRSlyfpadespctkqacGISGdshkafaknrr      |
|     |          | 771659841.ref  | YP_344509.1    | alkyl hydroperoxide reductase/ Thiol specific antioxidant               | Nitrosococcus oceani ATCC 19707                     | YFYPKDDTTPGCTREGGlyvsrdSHETFKAQQRvkgiers   |
| 333 | 1.26E-12 | 768842981.gb   | ABA58979.1     | alkyl hydroperoxide reductase/ Thiol specific antioxidant               | Nitrosococcus oceani ATCC 19707                     |                                            |
|     |          | 207088008.gb   | ED765282.1     | antioxidant. AhpC/TSA family                                            | Nitrosococcus oceani AFC27                          |                                            |
| 334 | 0        | 723832791.ref  | YP_292834.1    | putative bacterioferritin comigratory (BCP) protein                     | Prochlorococcus marinus str. NATL2A                 | YFYPKDDTTPGCTKEACgjskshSHKFKIDKHKkgtiel    |
|     |          | 720031291.gb   | AAZ598931.1    | putative bacterioferritin comigratory (BCP) protein                     | Prochlorococcus marinus str. NATL2A                 |                                            |
| 335 | 2.21E-16 | 222951671.dbl  | BAO09003.1     | bacterioferritin comigratory protein                                    | Thermosynechococcus elongatus BP-1                  | YFYPKDDTTPGCTTEACgjspsdSHAKFQQKLDpjtkaa    |
|     |          | 537236301.ref  | YP_103051.1    | anti-oxidant AhpC/TSA family protein                                    | Burkholderia mallei ATCC 23344                      | SLSGIKGKKlyfypkdpdpctteaglGVSRDvrgiers     |
| 336 | 3.13E-11 | 676395651.ref  | ZP_00438412.1  | COG1225: Peroxiredoxin                                                  | Burkholderia mallei GB8 horse 4                     |                                            |
|     |          | 1218994031.ref | YP_993204.1    | anti-oxidant AhpC/TSA family protein                                    | Burkholderia mallei SAVP1                           |                                            |
|     |          | 1679656841.ref | YP_001026021.1 | anti-oxidant AhpC/TSA family protein                                    | Burkholderia mallei NCTC 10229                      |                                            |
|     |          | 1264507021.ref | YP_001080711.1 | anti-oxidant AhpC/TSA family protein                                    | Burkholderia mallei NCTC 10247                      |                                            |
|     |          | 164003861.ref  | ZP_02289640.1  | antioxidant. AhpC/Tsa family protein                                    | Burkholderia mallei PRL-20                          |                                            |
|     |          | 1943138791.ref | YP_002009559.1 | antioxidant. AhpC/Tsa family                                            | Burkholderia mallei ATCC 10399                      |                                            |
|     |          | 1945255821.ref | YP_002061112.1 | antioxidant. AhpC/TSA family                                            | Burkholderia mallei FMH                             |                                            |
|     |          | 1945257831.ref | YP_002062584.1 | antioxidant. AhpC/TSA family                                            | Burkholderia mallei JHU                             |                                            |
|     |          | 1945751321.ref | YP_002110016.1 | antioxidant. AhpC/TSA family                                            | Burkholderia mallei 2002721280                      |                                            |
|     |          | 524270531.gb   | AAU47646.1     | antioxidant. AhpC/Tsa family                                            | Burkholderia mallei ATCC 23344                      |                                            |
|     |          | 1212272131.gb  | ABM49731.1     | antioxidant. AhpC/Tsa family                                            | Burkholderia mallei SAVP1                           |                                            |
|     |          | 1242938741.gb  | ABN03143.1     | antioxidant. AhpC/Tsa family                                            | Burkholderia mallei NCTC 10229                      |                                            |
|     |          | 1262435721.gb  | ABO06665.1     | antioxidant. AhpC/Tsa family                                            | Burkholderia mallei NCTC 10247                      |                                            |
|     |          | 1477495921.gb  | EDK56666.1     | antioxidant. AhpC/TSA family                                            | Burkholderia mallei FMH                             |                                            |
|     |          | 1477537731.gb  | EDK60838.1     | antioxidant. AhpC/TSA family                                            | Burkholderia mallei JHU                             |                                            |
|     |          | 1480273841.gb  | EDK85405.1     | antioxidant. AhpC/TSA family                                            | Burkholderia mallei 2002721280                      |                                            |
|     |          | 1606992551.gb  | EDP89225.1     | antioxidant. AhpC/Tsa family                                            | Burkholderia mallei ATCC 10399                      |                                            |
| 337 | 0        | 1140479061.ref | YP_738456.1    | thioredoxin-dependent thiol peroxidase                                  | Shewanella sp. MR-7                                 | YFYPKASITPGCTVQAAGyvspKLAQFAEKQSYdgihri    |
|     |          | 1138893481.gb  | ABL43399.1     | Redoxin domain protein                                                  | Shewanella sp. MR-7                                 |                                            |
| 338 | 0        | 779608591.ref  | ZP_00824713.1  | COG1225: Peroxiredoxin                                                  | Yersinia mollaretii ATCC 43989                      | YFYPKAMTTPGCTVQAAGyvsdKLSRFAEKELydgihri    |
|     |          | 668091651.ref  | XP_638305.1    | AhpC/TSA family protein                                                 | Dicyostelium discoideum AX4                         | QNGKNlyfypkdkdskcneacGISNDsharfnisks       |
| 339 | 1.75E-10 | 60466751.gb    | EAL64800.1     | AhpC/TSA family protein                                                 | Dicyostelium discoideum AX4                         |                                            |
| 340 | 6.26E-15 | 1962453621.ref | ZP_03144086.1  | alkyl hydroperoxide reductase/ Thiol specific antioxidant/ Mal allergen | Cyanotheca sp. PCC 8802                             | DEGKTVSlyfypkddtpgctteagVSMDSkfkfkyg       |
|     |          | 1962006811.gb  | EDY01686.1     | alkyl hydroperoxide reductase/ Thiol specific antioxidant/ Mal allergen | Cyanotheca sp. PCC 8802                             |                                            |
| 341 | 0        | 1088000610.ref | YP_640807.1    | redoxin                                                                 | Mycobacterium sp. MCS                               | YFYPAASTPGCTKQAAGyvspKLAQFAEKQSYdgivirs    |
|     |          | 1196697491.ref | YP_939701.1    | redoxin domain-containing protein                                       | Mycobacterium sp. KMS                               |                                            |
|     |          | 1264362341.ref | YP_001071925.1 | alkyl hydroperoxide reductase/ Thiol specific antioxidant/ Mal allergen | Mycobacterium sp. JLS                               |                                            |
|     |          | 1087710291.gb  | ABG09751.1     | Redoxin                                                                 | Mycobacterium sp. MCS                               |                                            |
|     |          | 1196958381.gb  | ABL92911.1     | Redoxin domain protein                                                  | Mycobacterium sp. KMS                               |                                            |
|     |          | 1262360341.gb  | ABN99434.1     | alkyl hydroperoxide reductase/ Thiol specific antioxidant/ Mal allergen | Mycobacterium sp. JLS                               |                                            |
| 342 | 5.96E-13 | 2179706961.ref | YP_002355930.1 | alkyl hydroperoxide reductase/ Thiol specific antioxidant/ Mal allergen | Thaera sp. MZ1T                                     | YFYPKDKTTPGCTRQAAGyvspdTAEFRDQEGkmgvirs    |
|     |          | 1775080231.gb  | ACK55034.1     | alkyl hydroperoxide reductase/ Thiol specific antioxidant/ Mal allergen | Thaera sp. MZ1T                                     |                                            |
| 343 | 1.83E-11 | 461375611.ref  | XP_390472.1    | hypothetical protein EG10296.1                                          | Gibberella zeae PH-1                                | AAAKVAEKEDlypkasidgkvcGLSTDivaegas         |
|     |          | 166364241.ref  | YP_001656547.1 | bacterioferritin comigratory protein                                    | Microcystis aeruginosa NIES-843                     | YFYPKDFITPGCTLEARyvsadSHAELFCDSEGnpalhisa  |
| 344 | 1.26E-14 | 166086647.dbl  | BAO01355.1     | bacterioferritin comigratory protein                                    | Microcystis aeruginosa NIES-843                     |                                            |
| 345 | 1.20E-14 | 1928082551.ref | ZP_03036932.1  | alkyl hydroperoxide reductase/ Thiol specific antioxidant/ Mal allergen | Geobacillus sp. Y412MFC10                           | FFYPKNMPTITETEEACgjspsdSHAKFKIDKHSymgivirs |

|     |          |           |     |                |                                                                         |                                                             |
|-----|----------|-----------|-----|----------------|-------------------------------------------------------------------------|-------------------------------------------------------------|
| 346 | 1.13E-10 | 888519848 | ref | ZP_01134487.1  | alkyl hydroperoxide reductase/ Thiol specific antioxidant/ Mal allergen | Geobacillus sp. Y412MC10                                    |
| 347 | 0        | 62591328  | ref | YP_226730.1    | bacterioferritin comigratory protein                                    | Pseudocitronomonas tunicata D2                              |
| 348 | 3.43E-19 | 206901569 | emb | CAT_21151.1    | PROBABLE BACTERIOFERRITIN COMIGRATORY OXIDOREDUCTASE                    | Corynebacterium glutamicum ATCC 13032                       |
| 349 | 3.65E-16 | 218248242 | ref | YP_002251060.1 | bacterioferritin comigratory protein                                    | Dicyoglomus thermophilum H-6-12                             |
| 350 | 1.68E-14 | 88808472  | ref | ZP_01123922.1  | alkyl hydroperoxide reductase/ Thiol specific antioxidant/ Mal allergen | Cyanosche sp. PCC 8801                                      |
| 351 | 6.24E-11 | 123965617 | ref | YP_001010698.1 | putative bacterioferritin comigratory protein                           | Synechococcus sp. WH 7805                                   |
| 352 | 5.08E-16 | 119482324 | ref | ZP_016203653.1 | putative bacterioferritin comigratory protein                           | Prochlorococcus marinus str. MIT 9515                       |
| 353 | 0        | 451878765 | ref | NP_984079.1    | bacterioferritin comigratory protein                                    | Lyngbya sp. PCC 8 106                                       |
| 354 | 4.76E-13 | 44882640  | ref | AA5519103.1    | merozoit cappling protein 1                                             | Ashbya gossypii ATCC 10895                                  |
| 355 | 7.47E-12 | 218531160 | ref | YP_002421976.1 | alkyl hydroperoxide reductase/ Thiol specific antioxidant/ Mal allergen | Plasmodium vivax Sal-1                                      |
| 356 | 1.17E-11 | 218529463 | gb  | ACK84048.1     | alkyl hydroperoxide reductase/ Thiol specific antioxidant/ Mal allergen | Plasmodium vivax                                            |
| 357 | 5.13E-10 | 144898144 | emb | CAW75008.1     | bacterioferritin comigratory protein                                    | Methylobacterium chloromethanicum CM4                       |
| 358 | 0        | 124543815 | ref | YP_01707852.1  | Redoxin                                                                 | Methylobacterium chloromethanicum CM4                       |
| 359 | 4.41E-17 | 218130651 | ref | ZP_034593655.1 | hypothetical protein BACEGG_02140                                       | Hyphomonas neptunium ATCC 15444                             |
| 360 | 1.30E-16 | 148825467 | ref | YP_001290202.1 | thioredoxin-dependent thiol peroxidase                                  | Magnetsporillum glyphiswaldense MSR-1                       |
| 361 | 0        | 50285829  | ref | XP_445343.1    | unnamed protein product                                                 | Shewanella putrefaciens 200                                 |
| 362 | 4.19E-13 | 17105871  | ref | YP_001791080.1 | alkyl hydroperoxide reductase/ Thiol specific antioxidant/ Mal allergen | Bacteroides eggertii DSM 20697                              |
| 363 | 6.43E-13 | 167472217 | ref | AC343295.1     | alkyl hydroperoxide reductase/ Thiol specific antioxidant/ Mal allergen | Bacteroides eggertii DSM 20697                              |
| 364 | 0        | 17230867  | ref | NP_486415.1    | thioredoxin peroxidase                                                  | Haemophilus influenzae PRTE                                 |
| 365 | 5.70E-13 | 88863755  | gb  | ABD54632.1     | hypothetical protein all2375                                            | Candida glabrata                                            |
| 366 | 4.08E-12 | 119457393 | gb  | EAW38518.1     | alkyl hydroperoxide reductase/ Thiol specific antioxidant/ Mal allergen | Candida glabrata                                            |
| 367 | 0        | 15898858  | ref | NP_343463.1    | peroxiredoxin                                                           | Leptothrix cholodnii SP-6                                   |
| 368 | 1.77E-14 | 157964860 | ref | YP_001499884.1 | bacterioferritin comigratory protein                                    | Leptothrix cholodnii SP-6                                   |
| 369 | 0        | 157691608 | ref | YP_001488070.1 | peroxiredoxin YpaF                                                      | Rickettsia massillae MTU5                                   |
| 370 | 1.03E-13 | 89054206  | ref | YP_509657.1    | alkyl hydroperoxide reductase/ Thiol specific antioxidant/ Mal allergen | Bacillus pumilus SAFR-032                                   |
| 371 | 3.30E-09 | 91782911  | ref | YP_558117.1    | putative peroxiredoxin, bacterioferritin comigratory protein            | Bacillus pumilus SAFR-032                                   |
| 372 | 0        | 209525373 | ref | ZP_03273914.1  | putative peroxiredoxin, bacterioferritin comigratory protein            | Bacillus pumilus SAFR-032                                   |
| 373 | 1.06E-14 | 182419263 | emb | ED294538.1     | alkyl hydroperoxide reductase/ Thiol specific antioxidant/ Mal allergen | Bacillus sp. B14905                                         |
| 374 | 0        | 126649491 | ref | ZP_01721732.1  | alkyl hydroperoxide reductase/ Thiol specific antioxidant/ Mal allergen | Bacillus sp. B14905                                         |
| 375 | 4.95E-13 | 92117857  | ref | YP_577686.1    | alkyl hydroperoxide reductase/ Thiol specific antioxidant/ Mal allergen | Bacillus sp. B14905                                         |
| 376 | 7.57E-11 | 145888616 | ref | YP_001155213.1 | alkyl hydroperoxide reductase/ Thiol specific antioxidant/ Mal allergen | Nitrobacter hamburgensis X14                                |
| 377 | 0        | 34556641  | ref | NP_906456.1    | bacterioferritin comigratory protein                                    | Nitrobacter hamburgensis X14                                |
| 378 | 3.57E-15 | 57867295  | ref | YP_183869.1    | bacterioferritin comigratory protein                                    | Polynucleobacter necessarius subsp. symbioticus QLW-P1DMW-1 |
| 379 | 0        | 192360325 | ref | YP_001982138.1 | Bcp                                                                     | Polynucleobacter necessarius subsp. symbioticus QLW-P1DMW-1 |
| 380 | 6.28E-14 | 121593512 | ref | ZP_03470467.1  | alkyl hydroperoxide reductase/ Thiol specific antioxidant/ Mal allergen | Wolinella succinogenes DSM 1740                             |
|     |          | 120007592 | gb  | ABM43332.1     | alkyl hydroperoxide reductase/ Thiol specific antioxidant/ Mal allergen | Wolinella succinogenes DSM 1740                             |
|     |          | 218146198 | gb  | IEEC64266.1    | alkyl hydroperoxide reductase/ Thiol specific antioxidant/ Mal allergen | Staphylococcus epidermidis RP62A                            |

|     |          |            |     |                 |                                                                                     |  |  |  |  |                                                         |
|-----|----------|------------|-----|-----------------|-------------------------------------------------------------------------------------|--|--|--|--|---------------------------------------------------------|
| 381 | 5.94E-11 | 168952731  | qB  | ABA39076.2      | Integral membrane protein                                                           |  |  |  |  | Streptomyces albus                                      |
| 382 | 1.16E-14 | 183999969  | ref | YP_0018313220.1 | alkyl hydroperoxide reductase/ Thiol specific antioxidant/ Mal allergen             |  |  |  |  | Sulfurihydrogenibium sp. YO3AOP1                        |
|     |          | 183932036  | qB  | ACD66686.1      | alkyl hydroperoxide reductase/ Thiol specific antioxidant/ Mal allergen             |  |  |  |  | Sulfurihydrogenibium sp. YO3AOP1                        |
| 383 | 0        | 6322180    | ref | NP_017225.1     | Nuclear Thiol peroxidase which functions as an alkyl-hydroperoxide reductase        |  |  |  |  | Saccharomyces cerevisiae                                |
|     |          | 731778     | sp  | P40553.1        | DOT5_YEAST RecName: Full=Peroxidoredoxin DOT5; AltName: Full=unamed protein product |  |  |  |  | Saccharomyces cerevisiae                                |
|     |          | 558392     | emb | CAA882.3        | YIL010W                                                                             |  |  |  |  | Saccharomyces cerevisiae                                |
| 384 | 1.41E-11 | 89095083   | ref | ZP_01168010.1   | AhpC/TSA family protein                                                             |  |  |  |  | Oceanosprillum sp. MED92                                |
|     |          | 45270486   | qB  | AAS56624.1      | AhpC/TSA family protein                                                             |  |  |  |  | Oceanosprillum sp. MED92                                |
| 385 | 7.31E-11 | 89080644   | qB  | EAR59889.1      | AhpC/TSA family protein                                                             |  |  |  |  | Erythrobacter sp. NBP1                                  |
|     |          | 85708767   | ref | ZP_01039833.1   | bacterioferritin comigratory protein, putative                                      |  |  |  |  | Erythrobacter sp. NBP1                                  |
| 386 | 0        | 85690301   | qB  | EAQ30304.1      | bacterioferritin comigratory protein, putative                                      |  |  |  |  | Leptosprillum sp. Group II UBA                          |
| 387 | 0        | 124516173  | qB  | EAY57681.1      | putative peroxidoredoxin                                                            |  |  |  |  | Halohodospira halophila SL1                             |
|     |          | 121998910  | ref | YP_001001697.1  | redoxin domain-containing protein                                                   |  |  |  |  | Halohodospira halophila SL1                             |
|     |          | 121588315  | qB  | ABM60895.1      | Redoxin domain protein                                                              |  |  |  |  | Halohodospira halophila SL1                             |
| 388 | 4.80E-14 | 189424119  | ref | YP_001951296.1  | alkyl hydroperoxide reductase/ Thiol specific antioxidant/ Mal allergen             |  |  |  |  | Geobacter lovleyi SZ                                    |
|     |          | 189420378  | qB  | ACD94776.1      | alkyl hydroperoxide reductase/ Thiol specific antioxidant/ Mal allergen             |  |  |  |  | Geobacter lovleyi SZ                                    |
| 389 | 0        | 163938462  | qB  | YP_0016343346.1 | alkyl hydroperoxide reductase/ Thiol specific antioxidant/ Mal allergen             |  |  |  |  | Bacillus weihenstephanensis KBAB4                       |
|     |          | 163936065  | qB  | ABY41718.1      | alkyl hydroperoxide reductase/ Thiol specific antioxidant/ Mal allergen             |  |  |  |  | Bacillus weihenstephanensis KBAB4                       |
| 390 | 3.08E-11 | 194570897  | ref | YP_002105897.1  | antioxidant. AhpC/TSA family                                                        |  |  |  |  | Burkholderia pseudomallei 406e                          |
|     |          | 217421736  | ref | ZP_03453240.1   | antioxidant. AhpC/TSA family                                                        |  |  |  |  | Burkholderia pseudomallei 406e                          |
|     |          | 157807504  | qB  | ED084874.1      | antioxidant. AhpC/TSA family                                                        |  |  |  |  | Burkholderia pseudomallei 406e                          |
| 391 | 0        | 119898354  | ref | YP_933567.1     | putative bacterioferritin comigratory protein                                       |  |  |  |  | Azoarcus sp. BH72                                       |
|     |          | 119670767  | emb | CAI94680.1      | putative bacterioferritin comigratory protein                                       |  |  |  |  | Azoarcus sp. BH72                                       |
| 392 | 0        | 13541250   | ref | NP_110838.1     | peroxidoredoxin                                                                     |  |  |  |  | Thermoplasma volcanium GSS1                             |
| 393 | 5.18E-12 | 119720359  | ref | YP_920630.1     | redoxin domain-containing protein                                                   |  |  |  |  | Thermophilum pendens Hrk 5                              |
|     |          | 119525455  | qB  | ABL78827.1      | Redoxin domain protein                                                              |  |  |  |  | Thermophilum pendens Hrk 5                              |
| 394 | 1.87E-17 | 218441188  | ref | YP_002379517.1  | alkyl hydroperoxide reductase/ Thiol specific antioxidant/ Mal allergen             |  |  |  |  | Cyanothoe sp. PCC 7424                                  |
|     |          | 18173916   | qB  | ACK72649.1      | alkyl hydroperoxide reductase/ Thiol specific antioxidant/ Mal allergen             |  |  |  |  | Cyanothoe sp. PCC 7424                                  |
| 395 | 5.33E-14 | 91788060   | ref | YP_549012.1     | alkyl hydroperoxide reductase/ Thiol specific antioxidant/ Mal allergen             |  |  |  |  | Polaromonas sp. JS666                                   |
|     |          | 91697285   | qB  | ABE44114.1      | alkyl hydroperoxide reductase/ Thiol specific antioxidant/ Mal allergen             |  |  |  |  | Polaromonas sp. JS666                                   |
| 396 | 4.26E-14 | 83954335   | ref | ZP_00963055.1   | AhpC/TSA family protein                                                             |  |  |  |  | Sulfitobacter sp. NAS-14.1                              |
|     |          | 83841372   | qB  | EAP80542.1      | AhpC/TSA family protein                                                             |  |  |  |  | Sulfitobacter sp. NAS-14.1                              |
| 397 | 1.23E-10 | 207083464  | qB  | ED260890.1      | bacterioferritin comigratory protein                                                |  |  |  |  | Candidatus Pelagibacter sp. HTCC7211                    |
| 398 | 1.16E-10 | 167888954  | qB  | ACA089747.1     | AHP/TSA peroxidoredoxin                                                             |  |  |  |  | Pseudomonas putida                                      |
| 399 | 0        | 45948924   | ref | XP_001702592.1  | thioredoxin dependent peroxidase                                                    |  |  |  |  | Chlamydomonas reinhardtii                               |
|     |          | 158280614  | qB  | EDP06371.1      | thioredoxin dependent peroxidase                                                    |  |  |  |  | Chlamydomonas reinhardtii                               |
| 400 | 2.19E-09 | 15676648   | ref | NP_273792.1     | bacterioferritin comigratory protein                                                |  |  |  |  | Neisseria meningitidis MC58                             |
|     |          | 7225979    | qB  | AAF41163.1      | bacterioferritin comigratory protein                                                |  |  |  |  | Neisseria meningitidis MC58                             |
| 401 | 1.08E-10 | 16870190   | ref | ZP_02734233.1   | Redoxin                                                                             |  |  |  |  | Gemmata obscuriglobus UGM 2246                          |
| 402 | 0        | 39989536   | ref | NP_954487.1     | AhpC/TSA family protein                                                             |  |  |  |  | Geobacter sulfurreducens PCA                            |
|     |          | 39985493   | qB  | AAR38837.1      | AhpC/TSA family protein                                                             |  |  |  |  | Geobacter sulfurreducens PCA                            |
| 403 | 4.45E-11 | 114327505  | ref | YP_744662.1     | thioredoxin peroxidase                                                              |  |  |  |  | Granulibacter thebesdensis CGDNIH1                      |
|     |          | 1143115679 | qB  | AB161739.1      | thioredoxin peroxidase                                                              |  |  |  |  | Granulibacter thebesdensis CGDNIH1                      |
| 404 | 4.37E-12 | 194305516  | ref | YP_002017310.1  | alkyl hydroperoxide reductase/ Thiol specific antioxidant/ Mal allergen             |  |  |  |  | Pelodyctyon phaeoolithratiforme BU-1                    |
|     |          | 194307993  | qB  | ACF42693.1      | alkyl hydroperoxide reductase/ Thiol specific antioxidant/ Mal allergen             |  |  |  |  | Pelodyctyon phaeoolithratiforme BU-1                    |
| 405 | 7.36E-09 | 84999558   | ref | XP_954500.1     | Ahp/TSA family-related protein                                                      |  |  |  |  | Thelaira annulata                                       |
|     |          | 65305498   | emb | CAI73823.1      | Ahp/TSA family-related protein, putative                                            |  |  |  |  | Thelaira annulata                                       |
| 406 | 0        | 118617233  | ref | YP_905565.1     | peroxidoxin BcpB                                                                    |  |  |  |  | Mycobacterium ulcerans Agy99                            |
|     |          | 183882424  | ref | YP_001850715.1  | peroxidoxin BcpB                                                                    |  |  |  |  | Mycobacterium marinum M                                 |
|     |          | 183175750  | qB  | ACC40860.1      | peroxidoxin BcpB                                                                    |  |  |  |  | Mycobacterium marinum M                                 |
| 407 | 0        | 88713522   | ref | ZP_01107604.1   | bacterioferritin comigratory protein                                                |  |  |  |  | Flavobacteriales bacterium HTCC2170                     |
|     |          | 88708032   | qB  | EAR00270.1      | bacterioferritin comigratory protein                                                |  |  |  |  | Flavobacteriales bacterium HTCC2170                     |
| 408 | 0        | 134097806  | ref | YP_001103467.1  | bacterioferritin comigratory protein                                                |  |  |  |  | Saccharopolyspora erythraea NRRL 2338                   |
|     |          | 133910429  | emb | CAM00542.1      | bacterioferritin comigratory protein                                                |  |  |  |  | Saccharopolyspora erythraea NRRL 2338                   |
| 409 | 0        | 78779467   | ref | XP_396579.1     | putative bacterioferritin comigratory (BCP) protein                                 |  |  |  |  | Prochlorococcus marinus str. MIT 9312                   |
|     |          | 78711966   | qB  | ABB49143.1      | putative bacterioferritin comigratory (BCP) protein                                 |  |  |  |  | Prochlorococcus marinus str. MIT 9312                   |
| 410 | 2.80E-19 | 126658834  | ref | ZP_01729978.1   | bacterioferritin comigratory protein                                                |  |  |  |  | Cyanothoe sp. CCY0110                                   |
|     |          | 126619932  | qB  | EAZ906857.1     | bacterioferritin comigratory protein                                                |  |  |  |  | Cyanothoe sp. CCY0110                                   |
| 411 | 0        | 56479136   | ref | YP_160725.1     | alkyl hydroperoxide reductase                                                       |  |  |  |  | Azoarcus sp. Ebn1                                       |
|     |          | 56315179   | emb | CAI09824.1      | alkyl hydroperoxide reductase                                                       |  |  |  |  | Azoarcus sp. Ebn1                                       |
| 412 | 4.34E-15 | 78356074   | ref | YP_387523.1     | bacterioferritin comigratory protein, putative                                      |  |  |  |  | Desulfuobrio desulfuricans subs. desulfuricans str. G20 |
|     |          | 78218479   | qB  | ABB37828.1      | bacterioferritin comigratory protein, putative                                      |  |  |  |  | Desulfuobrio desulfuricans G20                          |
| 413 | 0        | 194017900  | ref | ZP_03065608.1   | antioxidant. AhpC/TSA family                                                        |  |  |  |  | Bacillus pumilus ATCC 7061                              |
|     |          | 194010366  | qB  | EDW19940.1      | antioxidant. AhpC/TSA family                                                        |  |  |  |  | Bacillus pumilus ATCC 7061                              |
| 414 | 1.82E-12 | 1105989146 | ref | ZP_01386424.1   | alkyl hydroperoxide reductase/ Thiol specific antioxidant/ Mal allergen             |  |  |  |  | Chlorobium ferrooxidans DSM 13031                       |
|     |          | 110340278  | qB  | EAT58775.1      | alkyl hydroperoxide reductase/ Thiol specific antioxidant/ Mal allergen             |  |  |  |  | Chlorobium ferrooxidans DSM 13031                       |
| 415 | 1.53E-12 | 196240724  | qB  | ZP_03139501.1   | alkyl hydroperoxide reductase/ Thiol specific antioxidant/ Mal allergen             |  |  |  |  | Cyanothoe sp. PCC 7425                                  |
|     |          | 196215184  | qB  | EDY08636.1      | alkyl hydroperoxide reductase/ Thiol specific antioxidant/ Mal allergen             |  |  |  |  | Cyanothoe sp. PCC 7425                                  |
| 416 | 1.07E-09 | 167846542  | ref | YP_001684205.1  | alkyl hydroperoxide reductase/ Thiol specific antioxidant/ Mal allergen             |  |  |  |  | Caulobacter sp. K31                                     |

|     |          |                |                |                                                                                           |                                                             |                                           |
|-----|----------|----------------|----------------|-------------------------------------------------------------------------------------------|-------------------------------------------------------------|-------------------------------------------|
| 417 | 1.58E-13 | 167348972.1    | ABZ71707.1     | alkyl hydroperoxide reductase/ Thiol specific antioxidant/ Mal allergen                   | Caulobacter sp. K31                                         | YKGIIVYVYPRAMTGTCTEAVGVSTDKAKFKKFKH       |
| 418 | 2.94E-10 | 1264665303.ref | YP_001040412.1 | alkyl hydroperoxide reductase/ Thiol specific antioxidant/ Mal allergen                   | Staphylothermus marinus F1                                  | YFYPKADTPGCTMIEGIGISPAISKFKSKRGQIGLHSA    |
| 419 | 8.69E-11 | 126014126.gb   | ABN69504.1     | alkyl hydroperoxide reductase/ Thiol specific antioxidant/ Mal allergen                   | Staphylothermus marinus F1                                  | YFYPKADTPGCTMIEGIGISPAISKFKSKRGQIGLHSA    |
| 420 | 0        | 154248760.ref  | YP_001409585.1 | alkyl hydroperoxide reductase/ Thiol specific antioxidant/ Mal allergen                   | Ferrobacterium nodosum RK17-B1                              | YFYPKADTPGCTMIEGIGISPAISKFKSKRGQIGLHSA    |
| 421 | 0        | 154752696.gb   | ABS59928.1     | alkyl hydroperoxide reductase/ Thiol specific antioxidant/ Mal allergen                   | Ferrobacterium nodosum RK17-B1                              | YFYPKADTPGCTMIEGIGISPAISKFKSKRGQIGLHSA    |
| 422 | 0        | 218767873.ref  | YP_002343385.1 | hypothetical protein NMA0963                                                              | Neisseria meningitidis Z2491                                | AAVAAYVYPKDSIPGATGTVVGIQRDKKIKVYGTES      |
| 423 | 0        | 110598541.ref  | CAW08187.1     | hypothetical protein NMA0963                                                              | Neisseria meningitidis Z2491                                | AAVAAYVYPKDSIPGATGTVVGIQRDKKIKVYGTES      |
| 424 | 0        | 110339845.gb   | EA158351.1     | Alkyl hydroperoxide reductase/ Thiol specific antioxidant/ Mal allergen                   | Chlorobium ferrooxidans DSM 13031                           | APAISALYFYPKADTPGCTEACGYSVDRKHKTEEKYQ     |
| 425 | 9.43E-13 | 216748172.ref  | NP_662877.1    | Alkyl hydroperoxide reductase/ Thiol specific antioxidant/ Mal allergen                   | Chlorobium ferrooxidans DSM 13031                           | APAISALYFYPKADTPGCTEACGYSVDRKHKTEEKYQ     |
| 426 | 0        | 21646030.gb    | AAW73219.1     | bacterioferritin comigratory protein, thiol peroxidase, putative                          | Chlorobium tepidum TLS                                      | IFYPGDDTIPVCTAQLCGJSGDSHKQFAEKHKLIARIDA   |
| 427 | 0        | 163976042.ref  | YP_03403301.1  | bacterioferritin comigratory protein, thiol peroxidase, putative                          | Chlorobium tepidum TLS                                      | IFYPGDDTIPVCTAQLCGJSGDSHKQFAEKHKLIARIDA   |
| 428 | 0        | 163219870.ref  | YP_001837866.1 | thioredoxin-dependent thiol peroxidase                                                    | Salmoneilla enterica subsp. enterica serovar Typh. str. AG3 | LKAGDIASIPDYFYPKAMTPTGCTVQACGISTQSDKSPENS |
| 429 | 0        | 189909938.ref  | YP_001961563.1 | putative peroxiredoxin Bcp (thioredoxin reductase, bacterioferritin comigratory protein)  | Leptospira biflexa serovar Patoc strain Patoc 1 (Paris)     | YFYPKADTPGCTEACGYSVDRKHKTEEKYQ            |
| 430 | 2.39E-11 | 167774674.gb   | ABZ92919.1     | Peroxiredoxin                                                                             | Leptospira biflexa serovar Patoc strain Patoc 1 (Ames)      | QNGVKRSTPGCTEACGYSVDRKHKTEEKYQ            |
| 431 | 0        | 167774674.gb   | ABZ92919.1     | putative peroxiredoxin Bcp (Thioredoxin reductase, Bacterioferritin comigratory protein)  | Leptospira biflexa serovar Patoc strain Patoc 1 (Ames)      | QNGVKRSTPGCTEACGYSVDRKHKTEEKYQ            |
| 432 | 0        | 148240508.ref  | ABE11037.1     | putative bacterioferritin comigratory protein                                             | uncultured Prochlorococcus marinus clone ASNCT79            | QNGVKRSTPGCTEACGYSVDRKHKTEEKYQ            |
| 433 | 0        | 147849047.emb  | CAK24598.1     | Peroxiredoxin                                                                             | Synechococcus sp. WH 7803                                   | YFYPKADTPGCTEACGYSVDRKHKTEEKYQ            |
| 434 | 3.68E-13 | 88803252.ref   | YP_01118778.1  | bacterioferritin comigratory protein, thiol peroxidase, putative                          | Synechococcus sp. WH 7803                                   | FFYPKASTPGCTNEACSEADTKKQNPPLADYDGIHRT     |
| 435 | 2.80E-14 | 187870176.gb   | EAR119197.1    | bacterioferritin comigratory protein, thiol peroxidase, putative                          | Polianbacter igdensis 23-P                                  | FFYPKASTPGCTNEACSEADTKKQNPPLADYDGIHRT     |
| 436 | 0        | 167593756.gb   | ABZ285004.1    | bacterioferritin comigratory protein                                                      | Helobacterium modesticaldum Ice1                            | YFYPKADTPGCTEACGYSVDRKHKTEEKYQ            |
| 437 | 3.25E-11 | 91783424.ref   | YP_568630.1    | putative bacterioferritin comigratory oxidoreductase                                      | Helobacterium modesticaldum Ice1                            | YFYPKADTPGCTEACGYSVDRKHKTEEKYQ            |
| 438 | 0        | 168873768.gb   | ABE30578.1     | putative bacterioferritin comigratory oxidoreductase                                      | Burkholderia xenovorans LB400                               | YFYPKADTPGCTEACGYSVDRKHKTEEKYQ            |
| 439 | 2.39E-15 | 170077726.ref  | YP_001734364.1 | bacterioferritin comigratory protein                                                      | Burkholderia xenovorans LB400                               | YFYPKADTPGCTEACGYSVDRKHKTEEKYQ            |
| 440 | 1.03E-14 | 218440561.ref  | ACQ499108.1    | bacterioferritin comigratory protein                                                      | Synechococcus sp. PCC 7002                                  | DEGKTVSYFYPKADTPGCTEACGYSVDRKHKTEEKYQ     |
| 441 | 2.30E-15 | 163788318.ref  | ACK72022.1     | alkyl hydroperoxide reductase/ Thiol specific antioxidant/ Mal allergen                   | Cyanobacter sp. PCC 7424                                    | FFYPKASTPTGCTVEACGYSVDRKHKTEEKYQ          |
| 442 | 0        | 159878638.gb   | EDP70696.1     | bacterioferritin comigratory protein                                                      | Flavobacteriales bacterium AL-1                             | FFYPKASTPTGCTVEACGYSVDRKHKTEEKYQ          |
| 443 | 0        | 217499102.gb   | ACK46295.1     | alkyl hydroperoxide reductase/ Thiol specific antioxidant/ Mal allergen                   | Flavobacteriales bacterium AL-1                             | FFYPKASTPTGCTVEACGYSVDRKHKTEEKYQ          |
| 444 | 0        | 154501541.ref  | ED_02039242.1  | hypothetical protein BACCAP_04894                                                         | Shewanella baltica OS223                                    | FFYPKASTPTGCTVEACGYSVDRKHKTEEKYQ          |
| 445 | 1.13E-12 | 146303540.ref  | YP_001190856.1 | alkyl hydroperoxide reductase/ Thiol specific antioxidant/ Mal allergen                   | Bacteroides capillosus ATCC 29799                           | FFYPKASTPTGCTVEACGYSVDRKHKTEEKYQ          |
| 446 | 3.70E-11 | 46202189.ref   | ZP_00208423.1  | alkyl hydroperoxide reductase/ Thiol specific antioxidant/ Mal allergen                   | Bacteroides capillosus ATCC 29799                           | FFYPKASTPTGCTVEACGYSVDRKHKTEEKYQ          |
| 447 | 4.45E-16 | 212694173.ref  | YP_03302301.1  | hypothetical protein BACDOR_03699                                                         | Bacteroides dorei DSM 17855                                 | FFYPKASTPTGCTVEACGYSVDRKHKTEEKYQ          |
| 448 | 0        | 149385426.gb   | ABN64859.2     | predicted protein                                                                         | Pichia stipitis CBS 6054                                    | PPKRAAKTISLAYPKASTPGCTEACGYSVDRKHKTEEKYQ  |
| 449 | 0        | 54208729.gb    | AAV31124.1     | bacterioferritin comigratory protein                                                      | Pichia stipitis CBS 6054                                    | FFYPKASTPTGCTVEACGYSVDRKHKTEEKYQ          |
| 450 | 0        | 197786108.ref  | YP_002208683.1 | bacterioferritin comigratory protein                                                      | Yersinia ruckeri                                            | FFYPKASTPTGCTVEACGYSVDRKHKTEEKYQ          |
| 451 | 0        | 197928702.ref  | YP_03192996.1  | hypothetical protein SsvA_05325                                                           | Streptomyces svicicus ATCC 29083                            | FFYPKASTPTGCTVEACGYSVDRKHKTEEKYQ          |
| 452 | 0        | 197710462.gb   | EDY54496.1     | bacterioferritin comigratory protein                                                      | Streptomyces svicicus ATCC 29083                            | FFYPKASTPTGCTVEACGYSVDRKHKTEEKYQ          |
| 453 | 0        | 134095336.ref  | YP_001100413.1 | bacterioferritin comigratory protein (blue copper protein like)                           | Herminimonas arsenicoxydans                                 | FFYPKASTPTGCTVEACGYSVDRKHKTEEKYQ          |
| 454 | 0        | 13373924.1.emb | CAL62290.1     | putative peroxiredoxin Bcp (Thioredoxin reductase) (Bacterioferritin comigratory protein) | Herminimonas arsenicoxydans                                 | FFYPKASTPTGCTVEACGYSVDRKHKTEEKYQ          |
| 455 | 0        | 116071418.ref  | ZP_01468687.1  | putative bacterioferritin comigratory protein (BCP) protein                               | Synechococcus sp. BL107                                     | FFYPKASTPTGCTVEACGYSVDRKHKTEEKYQ          |
| 456 | 0        | 90019288.gb    | ABD84295.1     | unknown                                                                                   | Synechococcus sp. BL107                                     | FFYPKASTPTGCTVEACGYSVDRKHKTEEKYQ          |
| 457 | 2.56E-14 | 196192986.gb   | EDX87945.1     | antioxidant, hApcTSA family                                                               | Yersinia sp. MH-1                                           | FFYPKASTPTGCTVEACGYSVDRKHKTEEKYQ          |
| 458 | 3.90E-14 | 206877905.gb   | ED242392.1     | bacterioferritin comigratory protein                                                      | Alcanivorax sp. DG881                                       | FFYPKASTPTGCTVEACGYSVDRKHKTEEKYQ          |
| 459 | 1.08E-11 | 124516013.gb   | EAJ75752.1     | Peroxiredoxin                                                                             | Rhodobacterales bacterium HTCC2083                          | FFYPKASTPTGCTVEACGYSVDRKHKTEEKYQ          |
| 460 | 3.93E-13 | 46449641.ref   | YP_010035.1    | bacterioferritin comigratory protein, putative                                            | Desulfotribium vulgare subsp. vulgare str. Hildenborough    | FFYPKASTPTGCTVEACGYSVDRKHKTEEKYQ          |
| 461 | 0        | 15893013.ref   | NP_360727.1    | bacterioferritin comigratory protein                                                      | Rickettsia conorii str. Malish 7                            | FFYPKASTPTGCTVEACGYSVDRKHKTEEKYQ          |
| 462 | 0        | 15820213.gb    | AAU03628.1     | bacterioferritin comigratory protein                                                      | Rickettsia conorii str. Malish 7                            | FFYPKASTPTGCTVEACGYSVDRKHKTEEKYQ          |
| 463 | 2.49E-10 | 77966572.ref   | YP_368544.1    | Alkyl hydroperoxide reductase/ Thiol specific antioxidant/ Mal allergen                   | Burkholderia sp. 383                                        | LVAGHAIYFYPKADTPGCTEACGYSVDRKHKTEEKYQ     |
| 464 | 0        | 77966572.ref   | YP_368544.1    | Alkyl hydroperoxide reductase/ Thiol specific antioxidant/ Mal allergen                   | Burkholderia sp. 383                                        | LVAGHAIYFYPKADTPGCTEACGYSVDRKHKTEEKYQ     |
| 465 | 1.09E-13 | 782129316.gb   | YP_381715.1    | twin-arginine translocation pathway signal                                                | Synechococcus sp. CC9605                                    | FFYPKASTPTGCTVEACGYSVDRKHKTEEKYQ          |
| 466 | 0        | 110638985.ref  | ABR35180.1     | bacterioferritin comigratory protein                                                      | Synechococcus sp. CC9605                                    | FFYPKASTPTGCTVEACGYSVDRKHKTEEKYQ          |
| 467 | 0        | 110279686.gb   | ABG57852.1     | bacterioferritin comigratory protein                                                      | Cytophaga hutchinsonii ATCC 33406                           | QNGKIVSYFYPKADTPGCTEACGYSVDRKHKTEEKYQ     |
| 468 | 1.19E-10 | 148548508.ref  | YP_001266610.1 | alkyl hydroperoxide reductase/ Thiol specific antioxidant/ Mal allergen                   | Pseudomonas putida F-1                                      | FFYPKASTPTGCTVEACGYSVDRKHKTEEKYQ          |
| 469 | 0        | 167035176.ref  | YP_001670407.1 | alkyl hydroperoxide reductase/ Thiol specific antioxidant/ Mal allergen                   | Pseudomonas putida GB-1                                     | FFYPKASTPTGCTVEACGYSVDRKHKTEEKYQ          |
| 470 | 0        | 148510566.gb   | ABO77426.1     | alkyl hydroperoxide reductase/ Thiol specific antioxidant/ Mal allergen                   | Pseudomonas putida GB-1                                     | FFYPKASTPTGCTVEACGYSVDRKHKTEEKYQ          |
| 471 | 0        | 166861664.gb   | ABZ20072.1     | alkyl hydroperoxide reductase/ Thiol specific antioxidant/ Mal allergen                   | uncultured bacterium BAC13K9BAC                             | FFYPKASTPTGCTVEACGYSVDRKHKTEEKYQ          |
| 472 | 1.13E-11 | 68304923.gb    | AAV789934.1    | predicted bacterioferritin comigratory protein XF0861                                     | Parabacteroides distasonis ATCC 8503                        | YKGRKVAIYFYPKADTPGCTEACGYSVDRKHKTEEKYQ    |
| 473 | 4.62E-14 | 150009087.ref  | YP_001302830.1 | putative bacterioferritin co-migratory protein                                            | Parabacteroides distasonis ATCC 8503                        | YKGRKVAIYFYPKADTPGCTEACGYSVDRKHKTEEKYQ    |



|     |          |             |                    |                                                                         |                                                                |                                         |
|-----|----------|-------------|--------------------|-------------------------------------------------------------------------|----------------------------------------------------------------|-----------------------------------------|
| 455 | 5.00E-12 | 149933208.1 | ABR43208.1         | putative bacterioferritin co-migratory protein                          | Parabacteroides distasonis ATCC 8503                           | LFYPLDFSPVCSLQLPstidstSHKAFSEQLGkagllrh |
| 456 | 0        | 159899991.1 | ref YP_001648158.1 | alkyl hydroperoxide reductase/ Thiol specific antioxidant/ Mal allergen | Herpetosiphon aurantiacus ATCC 23779                           | YFYPKDNTPGCTKEAAGyvtstSHQKFKTEKFAleglaq |
| 457 | 2.86E-11 | 159899991.1 | ref YP_001648158.1 | alkyl hydroperoxide reductase/ Thiol specific antioxidant/ Mal allergen | Herpetosiphon aurantiacus ATCC 23779                           | YFYPKDNTPGCTKEAAGyvtstSHQKFKTEKFAleglaq |
| 458 | 3.24E-15 | 37521945    | ref NP_925322.1    | bacterioferritin comigratory protein                                    | Gloeobacter violaceus PCC 7421                                 | YFYPKDNTPGCTTEGLgvrsdSHDSFCAKQGlglers   |
| 459 | 0        | 35212944    | dbj BAC90317.1     | alkyl hydroperoxide reductase/ Thiol specific antioxidant/ Mal allergen | Gloeobacter violaceus PCC 7421                                 | YFYPKDNTPGCTTEGLgvrsdSHDSFCAKQGlglers   |
| 460 | 0        | 71898917    | ref ZP_00681084.1  | alkyl hydroperoxide reductase/ Thiol specific antioxidant/ Mal allergen | Xylella fastidiosa Ann-1                                       | QNGDQRSfykddlbgdcaaacGVSGGbsnrfaehts    |
| 461 | 5.54E-12 | 78184889    | ref EAO33393.1     | putative bacterioferritin comigratory protein                           | Xylella fastidiosa Ann-1                                       | SLSDFAGKQVYypkamtbgctkeacGlsPdvagvfrs   |
| 462 | 0        | 78184889    | ref EAO33393.1     | putative bacterioferritin comigratory protein                           | Xylella fastidiosa Ann-1                                       | SLSDFAGKQVYypkamtbgctkeacGlsPdvagvfrs   |
| 463 | 0        | 78184889    | ref EAO33393.1     | putative bacterioferritin comigratory protein                           | Xylella fastidiosa Ann-1                                       | SLSDFAGKQVYypkamtbgctkeacGlsPdvagvfrs   |
| 464 | 3.36E-10 | 19553688    | ref NP_0011690.1   | bacterioferritin comigratory protein                                    | Synechococcus sp. CC9902                                       | YFYPKDNTPGCTTEAGglspsdSHEKFSKFDyglirs   |
| 465 | 1.38E-14 | 14529649    | ref YP_001139312.1 | hypothetical protein cgr_2402                                           | Corynebacterium glutamicum R                                   | FFYPKDDITGCTAESLgmspdCHDKFKIKHRIHgvrt   |
| 466 | 1.21E-10 | 88702107    | dbj EAO9210.1      | bacterioferritin comigratory protein                                    | Corynebacterium glutamicum R                                   | FFYPKDDITGCTAESLgmspdCHDKFKIKHRIHgvrt   |
| 467 | 0        | 94885089    | ref YP_604459.1    | redoxin                                                                 | Ganma proteobacterium KT.71                                    | YFYPKDDITGCTAESLgmspdCHDKFKIKHRIHgvrt   |
| 468 | 6.96E-11 | 149933208.1 | ref YP_001224959.1 | bacterioferritin comigratory protein                                    | Congregibacter litoralis KT71                                  | YFYPKDDITGCTAESLgmspdCHDKFKIKHRIHgvrt   |
| 469 | 1.04E-15 | 90407443    | ref ZP_01215627.1  | Bcp protein                                                             | Deinococcus geothermalis DSM 11300                             | LVAAAAYhprftsgcteahLTLEFQKLNcaisad      |
| 470 | 2.12E-14 | 90311474    | dbj EAS39575.1     | Bcp protein                                                             | Deinococcus geothermalis DSM 11300                             | LVAAAAYhprftsgcteahLTLEFQKLNcaisad      |
| 471 | 0        | 217031895   | ref ZP_03437397.1  | hypothetical protein HPB128_3g14                                        | Leptospira interrogans serovar Lai str. 56601                  | LPEISLEVYypkddlbgctkeacGlsLdshngllqkys  |
| 472 | 0        | 108562589   | ref YP_626875.1    | bacterioferritin comigratory protein                                    | Leptospira interrogans serovar Lai str. 56601                  | LPEISLEVYypkddlbgctkeacGlsLdshngllqkys  |
| 473 | 1.85E-14 | 75906660    | ref YP_320956.1    | alkyl hydroperoxide reductase/ Thiol specific antioxidant/ Mal allergen | Leptospira interrogans serovar Lai str. 56601                  | LPEISLEVYypkddlbgctkeacGlsLdshngllqkys  |
| 474 | 0        | 116073851   | ref ZP_01471113.1  | putative bacterioferritin comigratory protein                           | Leptospira interrogans serovar Copenhageni str. Fiocruz L1-130 | FFYPKDDITGCTAESLgmspdCHDKFKIKHRIHgvrt   |
| 475 | 0        | 110638282   | ref YP_67850.1     | bacterioferritin comigratory protein                                    | Leptospira interrogans serovar Copenhageni str. Fiocruz L1-130 | FFYPKDDITGCTAESLgmspdCHDKFKIKHRIHgvrt   |
| 476 | 1.82E-13 | 110280973   | dbj ABG59159.1     | bacterioferritin comigratory protein                                    | Leptospira interrogans serovar Copenhageni str. Fiocruz L1-130 | FFYPKDDITGCTAESLgmspdCHDKFKIKHRIHgvrt   |
| 477 | 9.36E-17 | 217038608   | ref YP_002334524.1 | bacterioferritin comigratory protein                                    | Leptospira interrogans serovar Copenhageni str. Fiocruz L1-130 | FFYPKDDITGCTAESLgmspdCHDKFKIKHRIHgvrt   |
| 478 | 4.19E-13 | 17203821    | ref YP_001802712.1 | probable bacterioferritin comigratory protein                           | Xanthomonas campestris pv. campestris str. 8004                | YFYPKDDITGCTAESLgmspdCHDKFKIKHRIHgvrt   |
| 479 | 1.24E-12 | 171697665   | dbj ACB50646.1     | probable bacterioferritin comigratory protein                           | Xanthomonas campestris pv. campestris str. 8004                | YFYPKDDITGCTAESLgmspdCHDKFKIKHRIHgvrt   |
| 480 | 0        | 119469474   | ref ZP_01612378.1  | bacterioferritin comigratory protein                                    | Xanthomonas campestris pv. campestris str. 8004                | YFYPKDDITGCTAESLgmspdCHDKFKIKHRIHgvrt   |
| 481 | 6.29E-14 | 169947542   | ref YP_001944071.1 | alkyl hydroperoxide reductase/ Thiol specific antioxidant/ Mal allergen | Xanthomonas campestris pv. campestris str. 8004                | YFYPKDDITGCTAESLgmspdCHDKFKIKHRIHgvrt   |
| 482 | 0        | 106230699   | ref ZP_03293556.1  | hypothetical protein CLOH1R_01506                                       | Xanthomonas campestris pv. campestris str. 8004                | YFYPKDDITGCTAESLgmspdCHDKFKIKHRIHgvrt   |
| 483 | 0        | 160937825   | ref ZP_02085233.1  | hypothetical protein CLOBOL_02769                                       | Xanthomonas campestris pv. campestris str. 8004                | YFYPKDDITGCTAESLgmspdCHDKFKIKHRIHgvrt   |
| 484 | 5.39E-14 | 158439101   | dbj EDP16895.1     | putative alkyl hydroperoxide reductase                                  | Xanthomonas campestris pv. campestris str. 8004                | YFYPKDDITGCTAESLgmspdCHDKFKIKHRIHgvrt   |
| 485 | 0        | 120436134   | ref YP_861820.1    | putative alkyl hydroperoxide reductase                                  | Xanthomonas campestris pv. campestris str. 8004                | YFYPKDDITGCTAESLgmspdCHDKFKIKHRIHgvrt   |
| 486 | 0        | 75906419    | ref YP_320715.1    | peroxiredoxin Bcp                                                       | Xanthomonas campestris pv. campestris str. 8004                | YFYPKDDITGCTAESLgmspdCHDKFKIKHRIHgvrt   |
|     |          | 75700144    | dbj ABA119820.1    | alkyl hydroperoxide reductase/ Thiol specific antioxidant/ Mal allergen | Xanthomonas campestris pv. campestris str. 8004                | YFYPKDDITGCTAESLgmspdCHDKFKIKHRIHgvrt   |

|     |                             |                                |                                                                         |  |                                                             |                                          |
|-----|-----------------------------|--------------------------------|-------------------------------------------------------------------------|--|-------------------------------------------------------------|------------------------------------------|
| 487 | 1.78E-15                    | 15790265 ref NP_280089.1       | hypothetical protein VNG1197G                                           |  | Halobacterium sp. NRC-1                                     | YFYPRADTPGCTSEAGjsdtdELAAAFKDKYNlaaetda  |
|     |                             | 1692335996 ref YP_0016389196.1 | peroxiredoxin (thioredoxin-dependent hydroperoxide peroxidase)          |  | Halobacterium salinarum R1                                  |                                          |
|     |                             | 10580729 gb AAG19569.1         | bacterioferritin comigratory protein                                    |  | Halobacterium sp. NRC-1                                     |                                          |
|     |                             | 167727062 emb CAP_19347.1      | peroxiredoxin (thioredoxin-dependent hydroperoxide peroxidase)          |  | Halobacterium salinarum R1                                  |                                          |
| 488 | 4.89E-16                    | 322665609 ref NP_86054.1       | bacterioferritin comigratory protein Bcp                                |  | Helicobacter hepaticus ATCC 51449                           | YFYPKDNTIPGCTIEAEGispsdCHQNFINKKAvglirs  |
|     |                             | 32262560 gb AAF77607.1         | bacterioferritin comigratory protein Bcp                                |  | Helicobacter hepaticus ATCC 51449                           |                                          |
| 489 | 0                           | 144032233 gb EEB73063.1        | bacterioferritin comigratory protein                                    |  | Thermococcus sp. AM4                                        | YFYPKDNTIPGCTTEAKGvsrdSHARFKERHSveqairs  |
| 490 | 1.15E-17                    | 168030229 ref XP_001076726.1   | predicted protein                                                       |  | Physcomonella patens subsp. patens                          | YFYPADESPTAQACgvsrgdSHKAFKAKYRepekthia   |
|     |                             | 162881155 gb ED067585.1        | predicted protein                                                       |  | Physcomonella patens subsp. patens                          |                                          |
| 491 | 1.13E-12                    | 1186602613 ref YP_903928.1     | alkyl hydroperoxide reductase/ Thiol specific antioxidant/ Mal allergen |  | Candidatus Ruthia magnifica str. Cm (Calyplogena magnifica) | YFYPKDAITPGCTTEGGvsykdIKHEFKAKQNYmgivrs  |
|     |                             | 118667552 gb ABL02357.1        | alkyl hydroperoxide reductase/ Thiol specific antioxidant/ Mal allergen |  | Candidatus Ruthia magnifica str. Cm (Calyplogena magnifica) |                                          |
| 492 | 3.72E-10                    | 219119839 ref XP_002180671.1   | predicted protein                                                       |  | Phaeodactylum tricornutum CCAP 1055/1                       | PLPAFAVPVTVYppgatskgtclearGVSVdlygsals   |
|     |                             | 217408144 gb EEC48079.1        | predicted protein                                                       |  | Phaeodactylum tricornutum CCAP 1055/1                       |                                          |
| 493 | 3.90E-11                    | 167838103 ref ZP_02462986.1    | antioxidant. AhpC/TSA family protein                                    |  | Burkholderia thailandensis MSMB43                           | YFYPAAFITGCTIEAhtgvsadKLPAlSKANRwaaahrq  |
| 494 | 5.08E-11                    | 11395519 ref YP_730606.1       | alkyl hydroperoxide reductase/ Thiol specific antioxidant/ Mal allergen |  | Synechococcus sp. CC9311                                    | LLAPTRVYfydrfsgtcleahSLSAFNKSGAalbad     |
|     |                             | 113882470 gb ABL47428.1        | alkyl hydroperoxide reductase/ Thiol specific antioxidant/ Mal allergen |  | Synechococcus sp. CC9311                                    |                                          |
| 495 | 2.64E-11                    | 126548037 ref NP_86307.1       | conserved hypothetical protein                                          |  | Streptomyces ambifaciens ATCC 23877                         | FFYPAALTSGCTAEACgvsrdLFGVRRGmsahdrad     |
| 496 | 0                           | 33861460 ref CAJ89752.1        | alkyl hydroperoxide reductase/ Thiol specific antioxidant/ Mal allergen |  | Prochlorococcus marinus subsp. pastoris str. COMP1986       | LEGINKSYfypkdlpdkleaqGVMSIDshkfkfkyg     |
|     |                             | 33634037 emb CAE18962.1        | alkyl hydroperoxide reductase/ Thiol specific antioxidant/ Mal allergen |  | Prochlorococcus marinus subsp. pastoris str. COMP1986       | ASASARtAsyprantsgcttqakGLSNpslsswsls     |
| 497 | 0                           | 148928977 ref ZP_01810653.1    | bacterioferritin comigratory protein like protein                       |  | Campylobacter jejuni subsp. jejuni CG8486                   | YFYPKDNTIPGCTTEACgjspsdSHEKFSKFDyegllrs  |
|     |                             | 145844385 gb EDK21494.1        | bacterioferritin comigratory protein                                    |  | Campylobacter jejuni subsp. jejuni CG8486                   |                                          |
| 498 | 0                           | 194427385 ref ZP_03059935.1    | peroxiredoxin                                                           |  | Escherichia coli B171                                       | YFYKAMTIPGCTVQAACglsdqKLSRFAEKELydgihri  |
|     |                             | 194414706 gb EDX30978.1        | peroxiredoxin                                                           |  | Escherichia coli B171                                       |                                          |
| 499 | 1.15E-14                    | 196183773 gb EDX78756.1        | antioxidant. AhpC/TSA family                                            |  | Microcoleus chthonoplastes PCC 7420                         | LAGKTVAfypkdlpdkleaqGVMSIDshkfkfkyg      |
| 500 | 2.94E-09                    | 71021535 ref XP_760998.1       | hypothetical protein UM04851.1                                          |  | Ustilago maydis 521                                         | ASASARtAsyprantsgcttqakGLSNpslsswsls     |
|     |                             | 46100862 gb IEAK86115.1        | hypothetical protein UM04851.1                                          |  | Ustilago maydis 521                                         |                                          |
| 501 | 1.16E-10                    | 28950134 emb CAD70992.1        | conserved hypothetical protein                                          |  | Neurospora crassa                                           | APVKKRAskkkiveeskfTYPKASTIPGCTRQVYcgjsad |
|     |                             | 30260694 ref NP_84307.1        | bacterioferritin comigratory protein                                    |  | Bacillus anthracis str. Ames                                | YFYPKDNTIPGCTTEACgvsyglteqktGVSPDymglers |
| 502 | 0                           | 47525807 ref YP_017156.1       | bacterioferritin comigratory protein                                    |  | Bacillus anthracis str. Ames                                |                                          |
|     |                             | 165870771 ref ZP_02215430.1    | bacterioferritin comigratory protein                                    |  | Bacillus anthracis str. Ames Ancestor                       |                                          |
| 503 | 167634700 ref ZP_02393019.1 | 167634700 ref ZP_02393019.1    | bacterioferritin comigratory protein                                    |  | Bacillus anthracis str. A0448                               |                                          |
|     |                             | 167640811 ref ZP_02399070.1    | bacterioferritin comigratory protein                                    |  | Bacillus anthracis str. A0193                               |                                          |
|     |                             | 170686596 ref ZP_02879802.1    | bacterioferritin comigratory protein                                    |  | Bacillus anthracis str. A0465                               |                                          |
|     |                             | 170707203 ref ZP_02897659.1    | bacterioferritin comigratory protein                                    |  | Bacillus anthracis str. A0389                               |                                          |
|     |                             | 177655118 ref ZP_02936748.1    | bacterioferritin comigratory protein                                    |  | Bacillus anthracis str. A0174                               |                                          |
|     |                             | 190688197 ref ZP_03021106.1    | bacterioferritin comigratory protein                                    |  | Bacillus anthracis T.sankovskii-I                           |                                          |
|     |                             | 196039752 ref ZP_03102140.1    | bacterioferritin comigratory protein                                    |  | Bacillus cereus W                                           |                                          |
|     |                             | 218901677 ref YP_002449511.1   | bacterioferritin comigratory protein                                    |  | Bacillus cereus AH820                                       |                                          |
|     |                             | 30254082 gb AAF24557.1         | bacterioferritin comigratory protein                                    |  | Bacillus anthracis str. Ames                                |                                          |
|     |                             | 47500955 gb AA129631.1         | bacterioferritin comigratory protein                                    |  | Bacillus anthracis str. Ames Ancestor                       |                                          |
|     |                             | 164713611 gb EDR19135.1        | bacterioferritin comigratory protein                                    |  | Bacillus anthracis str. A0488                               |                                          |
|     |                             | 167511205 gb EDR86592.1        | bacterioferritin comigratory protein                                    |  | Bacillus anthracis str. A0193                               |                                          |
|     |                             | 167529774 gb EDR92522.1        | bacterioferritin comigratory protein                                    |  | Bacillus anthracis str. A0442                               |                                          |
|     |                             | 170127991 gb ED598852.1        | bacterioferritin comigratory protein                                    |  | Bacillus anthracis str. A0389                               |                                          |
|     |                             | 170667456 gb EDT18213.1        | bacterioferritin comigratory protein                                    |  | Bacillus anthracis str. A0465                               |                                          |
|     |                             | 172080267 gb ED1166357.1       | bacterioferritin comigratory protein                                    |  | Bacillus anthracis str. A0174                               |                                          |
|     |                             | 190560689 gb EDV14665.1        | bacterioferritin comigratory protein                                    |  | Bacillus anthracis T.sankovskii-I                           |                                          |
|     |                             | 195892775 gb EDX56735.1        | bacterioferritin comigratory protein                                    |  | Bacillus cereus W                                           |                                          |
|     |                             | 218535016 gb ACK87414.1        | bacterioferritin comigratory protein                                    |  | Bacillus cereus AH820                                       |                                          |
| 503 | 3.27E-14                    | 167042601 gb ABZ07324.1        | putative AhpC/TSA family protein                                        |  | Burkholderia cenocepacia HF4000_ANIWI13316                  | YFYPKDFTPGCTIEADgjskdsHKHFCEKMKymglirs   |
| 504 | 2.94E-11                    | 206560300 ref YP_002231064.1   | AhpC/TSA family protein                                                 |  | uncultured marine crenarchaeote J2315                       | SLSDLKGKKLYfypkdlpdkleaqGVSPDymglers     |
|     |                             | 198036341 emb CAR52237.1       | AhpC/TSA family protein                                                 |  | Burkholderia cenocepacia J2315                              |                                          |
| 505 | 0                           | 56419012 ref YP_146330.1       | bacterioferritin comigratory protein                                    |  | Geobacillus kaustophilus HTA426                             | YFYPKDNTIPGCTAEACgvsrdRHEAFIEKYEymglids  |
|     |                             | 49718854 dbj BAD74762.1        | bacterioferritin comigratory protein                                    |  | Geobacillus kaustophilus HTA426                             |                                          |
| 506 | 0                           | 56183532 ref YP_026784.1       | bacterioferritin comigratory protein                                    |  | Bacillus anthracis str. Sterne                              | YFYPKDNTIPGCTTEACgvsyglteqktGVSPDymglers |
|     |                             | 52144776 ref YP_082052.1       | bacterioferritin comigratory protein                                    |  | Bacillus anthracis str. Sterne                              |                                          |
|     |                             | 49177459 gb AA152835.1         | bacterioferritin comigratory protein                                    |  | Bacillus anthracis str. Sterne                              |                                          |
|     |                             | 51978245 gb AAU19795.1         | bacterioferritin comigratory protein                                    |  | Bacillus cereus E33L                                        |                                          |
| 507 | 5.82E-15                    | 159027724 emb CA089593.1       | unnamed protein product                                                 |  | Microcystis aeruginosa PCC 7806                             | YFYPKDDITPGCTKQACgvsrdSHAQFKEKYSmshas    |
|     |                             | 126661731 ref ZP_01732730.1    | bacterioferritin comigratory protein                                    |  | Flavobacterium bacterium BAL38                              | FFYPKASTIPGCTAEACgvsrdAQAKFIDIKYEydgihri |
| 508 |                             | 126625170 gb EA295799.1        | bacterioferritin comigratory protein                                    |  | Flavobacterium bacterium BAL38                              |                                          |
| 509 | 0                           | 75324715 sp Q6UBJ3.1           | PERQ_SJASA RecName: Full=Peroxiredoxin Q, chloroplastic; AlhNal         |  | Suaeda salsa                                                | YKASIVayfpadetpdkqacGSGDshkafkkyk        |
|     |                             | 34420938 gb AA067661.1         | peroxiredoxin Q                                                         |  | Suaeda salsa                                                |                                          |
| 510 | 5.28E-15                    | 82751517 ref YP_417258.1       | bacterioferritin comigratory protein                                    |  | Staphylococcus aureus RF122                                 | LKGKKTlyfypdrtpctteacGSGDhnmfnkthrg      |
|     |                             | 82857048 emb CAI81485.1        | probable bacterioferritin comigratory protein                           |  | Staphylococcus aureus RF122                                 |                                          |
| 511 | 0                           | 15613511 ref NP_241814.1       | bacterioferritin comigratory protein                                    |  | Bacillus halodurans C-125                                   | YFYPKDNTIPGCTTEACgvsydrHKKFIEKYSymglers  |
|     |                             | 10173563 dbj BA064667.1        | bacterioferritin comigratory protein                                    |  | Bacillus halodurans C-125                                   |                                          |
| 512 | 1.12E-12                    | 183601582 ref ZP_02962952.1    | thioredoxin peroxidase                                                  |  | Bifidobacterium animalis subsp. lactis HN019                | ALADFKHQNYYfypkagvsctreakGISPDmiflis     |
|     |                             | 183219188 dbj ED189829.1       | thioredoxin peroxidase                                                  |  | Bifidobacterium animalis subsp. lactis HN019                |                                          |
| 513 | 1.01E-16                    | 149372354 ref ZP_01891542.1    | alkyl hydroperoxide reductase/ Thiol specific antioxidant/ Mal allergen |  | unidentified eubacterium SCB49                              | YFYPKNFTPGCTAEACgjsdssSHKFKASKFNlpgref   |
|     |                             | 149354744 gb EDIV43307.1       | alkyl hydroperoxide reductase/ Thiol specific antioxidant/ Mal allergen |  | unidentified eubacterium SCB49                              |                                          |

|     |          |            |     |                |                                                                        |                                             |                                           |
|-----|----------|------------|-----|----------------|------------------------------------------------------------------------|---------------------------------------------|-------------------------------------------|
| 514 | 0        | 149278862  | ref | ZP_01884997.1  | bacterioferritin comigratory protein                                   | Pedobacter sp. BAL39                        | FKGKKVYfypkdmtpgdaaacGVSDshqkfaakhs       |
| 515 | 0        | 149230481  | db  | EDM355665.1    | bacterioferritin comigratory protein                                   | Pedobacter sp. BAL39                        |                                           |
| 516 | 0        | 169823834  | ref | YP_001658092.1 | putative peroxiredoxin bcp                                             | Lysinibacillus sphaericus C3-41             | YFYPKDMITPGCTTEACGvpsptkHTKFDKHGmgliers   |
| 517 | 0        | 168990422  | gb  | ACA37982.1     | putative peroxiredoxin bcp                                             | Lysinibacillus sphaericus C3-41             |                                           |
| 518 | 0        | 154747936  | ref | YP_001408107.1 | bacterioferritin comigratory protein                                   | Campylobacter hominis ATCC BAA-381          | YFYPKDNITPGCTTEACGvpsdSHANFAAKOSV/gvirs   |
| 519 | 0        | 153603945  | gb  | ABS509592.1    | bacterioferritin comigratory protein                                   | Campylobacter hominis ATCC BAA-381          |                                           |
| 520 | 0        | 109626366  | emb | CAJ52825.1     | peroxiredoxin (thioredoxin-dependent hydroperoxidase)                  | Haloquadratum walsbyi DSM 16790             | EPGSSAPYfpradtpgctgcaGisDDdidaianeyd      |
| 521 | 0        | 152974291  | ref | YP_001373808.1 | bacterioferritin comigratory protein                                   | Synechococcus elongatus PCC 6301            | YFYPKDDITPGCTKEACGvpsdkHKQFKYAKYEvqkqliq  |
| 522 | 0        | 56752286   | ref | YP_172897.1    | bacterioferritin comigratory protein                                   | Synechococcus elongatus PCC 6301            |                                           |
| 523 | 0        | 81300615   | ref | YP_400823.1    | bacterioferritin comigratory protein                                   | Synechococcus elongatus PCC 6301            |                                           |
| 524 | 0        | 56687255   | dbj | BAD80477.1     | bacterioferritin comigratory protein                                   | Synechococcus elongatus PCC 6301            |                                           |
| 525 | 0        | 81169486   | gb  | ABB57836.1     | bacterioferritin comigratory protein                                   | Synechococcus elongatus PCC 6301            |                                           |
| 526 | 0        | 152974291  | ref | YP_001373808.1 | alkyl hydroperoxide reductase/Thiol specific antioxidant/ Mal allergen | Bacillus cereus subsp. cytotoxic NVH 391-98 | YFYPKDMITPGCTTEACGvpsdRHVKFIEKHHEymgliers |
| 527 | 0        | 152023043  | gb  | ABS20813.1     | alkyl hydroperoxide reductase/Thiol specific antioxidant/ Mal allergen | Bacillus cereus subsp. cytotoxic NVH 391-98 |                                           |
| 528 | 0        | 152974291  | ref | YP_001373808.1 | thioredoxin-dependent thiol peroxidase                                 | Actinobacillus succinogenes 1302            | YFYPKALITPGCTTQAACgispdkLAQFEFKQAYdghlri  |
| 529 | 0        | 150837986  | gb  | ABRR73757.1    | alkyl hydroperoxide reductase/Thiol specific antioxidant/ Mal allergen | Actinobacillus succinogenes 1302            |                                           |
| 530 | 0        | 152989164  | ref | YP_001340999.1 | alkyl hydroperoxide reductase/Thiol specific antioxidant/ Mal allergen | Actinobacillus succinogenes 1302            | YFYPKDDITPGCTTQAACGjstqkQHNQFIKAKYDgvsdli |
| 531 | 0        | 150837088  | gb  | ABRR71084.1    | alkyl hydroperoxide reductase/Thiol specific antioxidant/ Mal allergen | Actinobacillus succinogenes 1302            |                                           |
| 532 | 2.28E-18 | 189467480  | ref | ZP_03016265.1  | alkyl hydroperoxide reductase/Thiol specific antioxidant/ Mal allergen | Marinomonas sp. MWYL1                       | YFYPKDMITSGCTTQAACGvpsdSHQKFEIKENnegvleri |
| 533 | 6.61E-14 | 189435744  | gb  | EDV04729.1     | hypothetical protein BACINT_03869                                      | Marinomonas sp. MWYL1                       |                                           |
| 534 | 4.85E-12 | 121601658  | ref | YP_989095.1    | putative bacterioferritin                                              | Bacteroides intestinalis DSM 17393          | YFYPKADITPGCTKEAlyvsaaAQDKFKTKYTyngysra   |
| 535 | 0        | 50307441   | ref | XP_453899.1    | putative bacterioferritin                                              | Azorhizobium caulinodans ORS 571            |                                           |
| 536 | 0        | 78777927   | ref | YP_394312.1    | thioredoxin family protein                                             | Azorhizobium caulinodans ORS 571            |                                           |
| 537 | 0        | 28199812   | ref | YP_779926.1    | thioredoxin family protein                                             | Bartonella bacilliformis KC583              | YFYPKDDITSGCTTREAIGispdkHDKFKTKHKVaaara   |
| 538 | 0        | 182682354  | ref | YP_001830514.1 | alkyl hydroperoxide reductase/Thiol specific antioxidant/ Mal allergen | Sulfurimonas denificans DSM 1251            | YFYPKDDITSGCTTREAIGispdkHDKFKTKHKVaaara   |
| 539 | 0        | 2805727    | gb  | AAO29575.1     | alkyl hydroperoxide reductase/Thiol specific antioxidant/ Mal allergen | Sulfurimonas denificans DSM 1251            | YFYPKDDITSGCTTREAIGispdkHDKFKTKHKVaaara   |
| 540 | 0        | 182682354  | ref | YP_001830514.1 | alkyl hydroperoxide reductase/Thiol specific antioxidant/ Mal allergen | Xylella fastidiosa Temecula1                | YFYPKDDITSGCTTREAIGispdkHDKFKTKHKVaaara   |
| 541 | 1.20E-13 | 148361150  | ref | YP_001252357.1 | bacterioferritin comigratory protein                                   | Xylella fastidiosa M23                      | YFYPKADITPGCTTEGGjstqkSHQEFKSKONvrgliers  |
| 542 | 1.78E-10 | 163856793  | ref | YP_001631091.1 | peroxiredoxin                                                          | Legionella pneumophila str. Corby           |                                           |
| 543 | 0        | 50307441   | ref | XP_453899.1    | bacterioferritin comigratory protein                                   | Legionella pneumophila str. Corby           |                                           |
| 544 | 0        | 49642833   | emb | CAH07095.1     | unnamed protein product                                                | Bordetella pertussis DSM 12804              | LRRSNRisikevasknkFAYPKASITPGCTRQACgilead  |
| 545 | 0        | 193216036  | ref | YP_001896235.1 | KLLA0D14333p                                                           | Bordetella pertussis Thernema 1             |                                           |
| 546 | 1.17E-10 | 87124435   | ref | ZP_01080284.1  | alkyl hydroperoxide reductase/Thiol specific antioxidant/ Mal allergen | Kluveromyces laevis                         | YFYPKDDITPGCTTEACGvpsdSHKHDFRETHkksghlrik |
| 547 | 0        | 163260521  | emb | CAP42823.1     | Twin-arginine translocation pathway signal protein                     | Kluveromyces laevis                         |                                           |
| 548 | 0        | 50307441   | ref | XP_453899.1    | unnamed protein product                                                | Kluveromyces laevis                         |                                           |
| 549 | 0        | 197770492  | ref | YP_002193487.1 | alkyl hydroperoxide reductase/Thiol specific antioxidant/ Mal allergen | Kluveromyces laevis                         | YFYPKDDITPGCTTEAGvpsdkLAKFREKENygvit      |
| 550 | 0        | 197703534  | gb  | EDY49346.1     | alkyl hydroperoxide reductase/Thiol specific antioxidant/ Mal allergen | Streptomyces clavuligerus ATCC 27064        |                                           |
| 551 | 0        | 1577939064 | ref | YP_001490748.1 | bacterioferritin comigratory protein                                   | Streptomyces clavuligerus ATCC 27064        | YFYPKDDITPGCTTEAGvpsdkLAKFREKENygvit      |
| 552 | 0        | 15769918   | gb  | ABV68078.1     | bacterioferritin comigratory protein                                   | Streptomyces clavuligerus ATCC 27064        |                                           |
| 553 | 0        | 33692429   | ref | NP_880073.1    | putative bacterioferritin comigratory protein                          | Streptomyces clavuligerus ATCC 27064        | YFYPKDDITPGCTTEAGvpsdkLAKFREKENygvit      |
| 554 | 0        | 33601857   | ref | NP_889417.1    | putative bacterioferritin comigratory protein                          | Streptomyces clavuligerus ATCC 27064        |                                           |
| 555 | 0        | 33572074   | emb | CAE41603.1     | putative bacterioferritin comigratory protein                          | Streptomyces clavuligerus ATCC 27064        | YFYPKDDITPGCTTEAGvpsdkLAKFREKENygvit      |
| 556 | 0        | 33572074   | emb | CAE41603.1     | putative bacterioferritin comigratory protein                          | Streptomyces clavuligerus ATCC 27064        |                                           |
| 557 | 0        | 21226951   | ref | NP_632873.1    | bacterioferritin comigratory protein                                   | Streptomyces clavuligerus ATCC 27064        | YFYPKDDITPGCTTEAGvpsdkLAKFREKENygvit      |
| 558 | 0        | 20905263   | gb  | AAAM30545.1    | Bacterioferritin comigratory protein                                   | Streptomyces clavuligerus ATCC 27064        | YFYPKDDITPGCTTEAGvpsdkLAKFREKENygvit      |
| 559 | 0        | 11016845   | gb  | ABG52986.1     | Redoxin                                                                | Streptomyces clavuligerus ATCC 27064        | YFYPKDDITPGCTTEAGvpsdkLAKFREKENygvit      |
| 560 | 0        | 15922087   | ref | NP_377766.1    | bacterioferritin comigratory protein                                   | Streptomyces clavuligerus ATCC 27064        | YFYPKDDITPGCTTEAGvpsdkLAKFREKENygvit      |
| 561 | 0        | 15351124   | ref | YP_772963.1    | Redoxin                                                                | Streptomyces clavuligerus ATCC 27064        | YFYPKDDITPGCTTEAGvpsdkLAKFREKENygvit      |
| 562 | 0        | 11528112   | gb  | ABI86629.1     | Redoxin domain protein                                                 | Streptomyces clavuligerus ATCC 27064        | YFYPKDDITPGCTTEAGvpsdkLAKFREKENygvit      |
| 563 | 0        | 198263081  | gb  | EDY87359.1     | alkyl hydroperoxide reductase/Thiol specific antioxidant/ Mal allergen | Streptomyces clavuligerus ATCC 27064        | YFYPKDDITPGCTTEAGvpsdkLAKFREKENygvit      |
| 564 | 0        | 33519867   | ref | NP_878799.1    | thioredoxin-dependent thiol peroxidase                                 | Streptomyces clavuligerus ATCC 27064        | YFYPKDDITPGCTTEAGvpsdkLAKFREKENygvit      |
| 565 | 0        | 33504313   | emb | CAJ083205.1    | bacterioferritin comigratory protein                                   | Streptomyces clavuligerus ATCC 27064        | YFYPKDDITPGCTTEAGvpsdkLAKFREKENygvit      |
| 566 | 0        | 170746226  | ref | YP_001754486.1 | alkyl hydroperoxide reductase/Thiol specific antioxidant/ Mal allergen | Streptomyces clavuligerus ATCC 27064        | YFYPKDDITPGCTTEAGvpsdkLAKFREKENygvit      |
| 567 | 0        | 170554748  | gb  | ACB23803.1     | alkyl hydroperoxide reductase/Thiol specific antioxidant/ Mal allergen | Streptomyces clavuligerus ATCC 27064        | YFYPKDDITPGCTTEAGvpsdkLAKFREKENygvit      |
| 568 | 0        | 78184653   | ref | YP_377088.1    | alkyl hydroperoxide reductase/Thiol specific antioxidant/ Mal allergen | Streptomyces clavuligerus ATCC 27064        | YFYPKDDITPGCTTEAGvpsdkLAKFREKENygvit      |
| 569 | 0        | 78189847   | gb  | ABB26044.1     | alkyl hydroperoxide reductase/Thiol specific antioxidant/ Mal allergen | Streptomyces clavuligerus ATCC 27064        | YFYPKDDITPGCTTEAGvpsdkLAKFREKENygvit      |
| 570 | 0        | 148555089  | ref | YP_001262851.1 | alkyl hydroperoxide reductase/Thiol specific antioxidant/ Mal allergen | Streptomyces clavuligerus ATCC 27064        | YFYPKDDITPGCTTEAGvpsdkLAKFREKENygvit      |
| 571 | 0        | 148500259  | gb  | ABO68513.1     | alkyl hydroperoxide reductase/Thiol specific antioxidant/ Mal allergen | Streptomyces clavuligerus ATCC 27064        | YFYPKDDITPGCTTEAGvpsdkLAKFREKENygvit      |
| 572 | 0        | 160872284  | ref | ZP_02062396.1  | bacterioferritin comigratory protein                                   | Streptomyces clavuligerus ATCC 27064        | YFYPKDDITPGCTTEAGvpsdkLAKFREKENygvit      |
| 573 | 0        | 159121063  | gb  | EDP46401.1     | bacterioferritin comigratory protein                                   | Streptomyces clavuligerus ATCC 27064        | YFYPKDDITPGCTTEAGvpsdkLAKFREKENygvit      |
| 574 | 0        | 119944600  | ref | YP_942370.1    | bacterioferritin comigratory protein (Bcp)                             | Streptomyces clavuligerus ATCC 27064        | YFYPKDDITPGCTTEAGvpsdkLAKFREKENygvit      |
| 575 | 0        | 119663284  | gb  | ABM02771.1     | bacterioferritin comigratory protein (Bcp)                             | Streptomyces clavuligerus ATCC 27064        | YFYPKDDITPGCTTEAGvpsdkLAKFREKENygvit      |
| 576 | 0        | 52843036   | ref | YP_096835.1    | peroxiredoxin, AhpC/ISA family protein                                 | Streptomyces clavuligerus ATCC 27064        | YFYPKDDITPGCTTEAGvpsdkLAKFREKENygvit      |



|     |          |               |                 |                                                                               |  |  |                                             |                                            |
|-----|----------|---------------|-----------------|-------------------------------------------------------------------------------|--|--|---------------------------------------------|--------------------------------------------|
| 581 | 9.56E-15 | 159901222 ref | YP_001547469.1  | peroxidexin                                                                   |  |  | Herpetosiphon aurantiacus ATCC 23779        | YFYPKDDTTPGCTTQACGvspsdSHQKFKTKfDfmgvYvtrs |
| 582 | 7.94E-14 | 70803910 db   | ABX073341.1     | Peroxiredoxin                                                                 |  |  | Herpetosiphon aurantiacus ATCC 23779        | YFYPKATFTPGCTREIlgvsvdTQKSFADKCGleiktr     |
| 583 | 2.39E-11 | 6860658 gb    | AA7194487.1     | 2-cys peroxidexin                                                             |  |  | Sulfobobus acidocaldarius DSM 639           | YFYPKDDTTPGCTTQAAHhlafaeatGVSKDmgiera      |
| 584 | 6.88E-11 | 159043727 ref | YP_001532521.1  | alkyl hydroperoxide reductase/Thiol specific antioxidant/ Mal allergen        |  |  | Dinoroseobacter shibae DFL 12               | YFYPKDDTTPGCTTEGLGvsrdSHDNFCAKGGVglers     |
| 585 | 3.46E-13 | 21242503 ref  | ABV92920.0      | alkyl hydroperoxide reductase/Thiol specific antioxidant/ Mal allergen        |  |  | Xanthomonas axonopodis pv. citri str. 306   | YFYPKDDTTPGCTTEACEapdlDAIIGHkhrshfkgd      |
| 586 | 0        | 20708574 gb   | EED263068.1     | alkyl hydroperoxide reductase/Thiol specific antioxidant/ Mal allergen        |  |  | Alcyobacillus acidocaldarius LAA1           | YFYPKDDTTPGCTTEACEapdlDAIIGHkhrshfkgd      |
| 587 | 0        | 66819743 gb   | XP_643530.1     | AlpC/TSA family protein                                                       |  |  | Campylobacteriales bacterium GD 1           | GVIILISkdfakvYFYPKDDTTPGCTKEACGvsdd        |
| 588 | 0        | 187604333 ref | XP_643628.1     | AlpC/TSA family protein                                                       |  |  | Dicystostellium discoideum AX4              | YFYPKDDTTPGCTTEACGvsdtkQNFIAKNDvvaars      |
| 589 | 1.91E-15 | 39935622 ref  | NP_947798.1     | bacterioferitin co-migratory protein                                          |  |  | Rhodospseudomonas palustris CGA009          | KTSATKSSATfYpkiptkpaqdgreaIGVSAIdlqgilt    |
| 590 | 8.51E-12 | 50421939 ref  | XP_485960.1     | possible bacterioferitin co-migratory protein                                 |  |  | Rhodospseudomonas palustris CGA009          | FAYPKASITPGCTRQVQvsadKVKKIAIseskgaepng     |
| 591 | 1.97E-11 | 126739329 ref | XP_01755022.1   | DEHA2E05544p                                                                  |  |  | Debaromyces hansenii                        | FFYPRDDTTPGCTKEShlnqafadattGISKDNhwglers   |
| 592 | 3.28E-11 | 171317889 ref | XP_02907066.1   | AlpC/TSA family protein                                                       |  |  | Roseobacter sp. SK209-2-6                   | YFYPKDDTTPGCTTEGLGvsrdSHDNFCAKLEvrglers    |
| 593 | 5.97E-11 | 182677014 ref | YP_001831160.1  | alkyl hydroperoxide reductase/Thiol specific antioxidant/ Mal allergen        |  |  | Burkholderia ambifaria MEX-5                | SLADFAGKLYfypkddtsqctkeatGLKGDpsvashwk     |
| 594 | 6.49E-15 | 198270645 ref | XP_03209176.1   | alkyl hydroperoxide reductase/Thiol specific antioxidant/ Mal allergen        |  |  | Bejerinckia indica subsp. indica ATCC 9039  | YFYPKDDTTPGCTTAQACGvsrlnSHQKfIEKKNQeeglier |
| 595 | 3.34E-11 | 158317932 ref | YP_001510440.1  | hypothetical protein BACP1E_02841                                             |  |  | Bacteroides plebeius DSM 17735              | AFYFGDNTIPVCTKQMGvspsdHEAFARFVSgdlrs       |
| 596 | 0        | 753363180 sb  | O9MB35.1        | PERO_SEDL1 RecName: Full=Peroxidexin Q, chloroplastic; AltName= Peroxidexin Q |  |  | Frankia sp. EAN1pec                         | LKFSHASfYpadeitpgctkqcaGISGDshhkaafakyy    |
| 597 | 3.75E-17 | 163847593 ref | YP_001635607.1  | alkyl hydroperoxide reductase/Thiol specific antioxidant/ Mal allergen        |  |  | Sedum lineare                               | YFYPKDDTTPGCTSOACGvspsdSHAKFKTKfHNMvgllrs  |
| 600 | 0        | 187699071 ref | YP_029853005.1  | alkyl hydroperoxide reductase/Thiol specific antioxidant/ Mal allergen        |  |  | Chloroflexus aurantiacus J-10-fl            | QLASLRYfypkddtppgctkeacGISKDShtfinkfyq     |
| 601 | 0        | 124021974 ref | YP_001016281.1  | alkyl hydroperoxide reductase/Thiol specific antioxidant/ Mal allergen        |  |  | Chloroflexus sp. Y-400-fl                   | WP6KAQAYfypkddtppgctkeacGISADghrsreviewel  |
| 602 | 1.03E-13 | 123962260 gb  | ABM77016.1      | alkyl hydroperoxide reductase/Thiol specific antioxidant/ Mal allergen        |  |  | Synechococcus sp. WH 5701                   | DPAPTRfYfypkdsipgdtscGVSRSdngntfekaa       |
| 603 | 9.43E-13 | 87282605 gb   | EAQ74863.1      | alkyl hydroperoxide reductase/Thiol specific antioxidant/ Mal allergen        |  |  | Mariplundus ferrooxidans PV-1               | YFYPKDDTTPGCTVEAGvsytdQQAQFRDRCCjpsgdra    |
| 604 | 1.18E-10 | 158063228 ref | NP_204933.1     | alkyl hydroperoxide reductase/Thiol specific antioxidant/ Mal allergen        |  |  | Derooccus radiotrans R1                     | YFYPKDDTTPGCTTREAEGvsrdSHANFRKKYQmgllrs    |
| 605 | 1.02E-14 | 6458949 gb    | AAF10779.1      | alkyl hydroperoxide reductase/Thiol specific antioxidant/ Mal allergen        |  |  | Anaplasma marginale str. St. Maries         | YFYPKDDTTPGCTTQAAHhlafaeatGVSKDmgiera      |
| 606 | 1.07E-12 | 109625661 emb | CAJ52092.1      | peroxidexin-like protein                                                      |  |  | Haloquadratum walsbyi DSM 16790             | LVSLSLlyfypkdfatgactekELKDKF5KYNjgsad      |
| 607 | 8.61E-17 | 126696234 ref | YP_001091180.1  | alkyl hydroperoxide reductase/Thiol specific antioxidant/ Mal allergen        |  |  | Prochlorococcus marinus str. MIT 9301       | LPSSGGAfYfypkddtppgctkeacGVSSDshhkaftkhr   |
| 608 | 0        | 126543337 ref | ABO17579.1      | alkyl hydroperoxide reductase/Thiol specific antioxidant/ Mal allergen        |  |  | Cyanothece sp. PCC 7425                     | FFYPRDDTTPGCTKEShlnqafadattGISKDNhwglers   |
| 609 | 1.83E-11 | 99080932 ref  | YP_613086.1     | redoxin                                                                       |  |  | Silicibacter sp. TM1040                     | YFYPKDDTTPGCTTEGGvsrdsSHEKFKAKMnvgldtrs    |
| 610 | 1.74E-12 | 82703066 ref  | YP_412632.1     | Redoxin                                                                       |  |  | Nitrosospora multiformis ATCC 25196         | YFYPKDDTTPGCTKQACGvsndVIGISRDSshadfinkyd   |
| 611 | 0        | 169334264 ref | AB875240.1      | alkyl hydroperoxide reductase/Thiol specific antioxidant/ Mal allergen        |  |  | Anaerostipes stercoriformis DSM 17244       | LLGGGAAYfypkddtppgctkeacGVSSDshhkaftkhr    |
| 612 | 3.21E-13 | 162453285 ref | YP_001615662.1  | hypothetical protein ANASTE_00662                                             |  |  | Sorangium cellulosum 'So ce 56'             | LAKKKVlyfypkddtppgctkeacGVSSDshhkaftkhr    |
| 613 | 3.87E-09 | 154253708 ref | YP_001444532.1  | bacterioferitin co-migratory protein                                          |  |  | Sorangium cellulosum 'So ce 56'             | YFYPKDDTTPGCTKQACGvspsdSHANFRKKYQmgllrs    |
| 614 | 0        | 54023231 ref  | YP_117473.1     | alkyl hydroperoxide reductase/Thiol specific antioxidant/ Mal allergen        |  |  | Nocardia farcinica IFM 10152                | LKGGKAYfypkddtppgctkeacGVSSDshhkaftkhr     |
| 615 | 4.33E-15 | 49486681 ref  | YP_043902.1     | AlpC/TSA family protein                                                       |  |  | Staphylococcus aureus subsp. aureus MSSA476 | QTGTVRSfYpaaimgtckqcaGISDtkqarfadqr        |
| 616 | 0        | 49245124 emb  | CAC43590.1      | AlpC/TSA family protein                                                       |  |  | Staphylococcus aureus subsp. aureus MSSA476 |                                            |
| 616 | 0        | 126435649 ref | YP_0010717340.1 | alkyl hydroperoxide reductase/Thiol specific antioxidant/ Mal allergen        |  |  | Mycobacterium sp. JLS                       |                                            |



|     |          |           |     |                 |                                                                         |                                                               |                                          |
|-----|----------|-----------|-----|-----------------|-------------------------------------------------------------------------|---------------------------------------------------------------|------------------------------------------|
| 645 | 0        | 72162759  | ref | YP_290416.1     | bacterioferritin comigratory protein                                    | <i>Thermobifida fusca</i> YX                                  | YFYPAAMTPGCTTQAACgspdrLAKFAEQEGvqgvrfs   |
| 646 | 6.44E-12 | 71916491  | db  | AAZ563933.1     | bacterioferritin comigratory protein                                    | <i>Thermobifida fusca</i> YX                                  | YFYPKDSTPGCTEGQgysvskKHFKKAKONymgvrfs    |
| 647 | 0        | 148244707 | ref | YP_001219401.1  | AhpC/TSA family peroxidoredoxin                                         | <i>Candidatus Vesicomomyces okutanii</i> HA                   | YFYKAMTPGCTVQAACglsctdKLSRFAEKELydgihrt  |
| 648 | 1.67E-13 | 188533210 | ref | YP_001907007.1  | putative peroxidoredoxin                                                | <i>Erwinia tasmaniensis</i> Et1799                            | SLGDFKGGKkVypkamipgpcivqaeGVSVDydgihrt   |
| 649 | 0        | 188028252 | emb | CA096110.1      | bacterioferritin comigratory protein                                    | <i>Vibrio</i> sp. MED222                                      | SLKQFRDEKkNypkamipgpcivqacGVPDdlglhks    |
| 650 | 2.79E-12 | 86605608  | ref | YP_47371.1      | antioxidant, AhpC/TSA family protein                                    | <i>Synechococcus</i> sp. JA-3-3Ab                             | YFYPRDFTAGCTIEARgvsadsSHRRFCSAEgpegjlira |
| 651 | 5.20E-13 | 3242986   | db  | ABC99108.1      | antioxidant, AhpC/Tsa family                                            | <i>Synechococcus</i> sp. JA-3-3Ab                             | FTYPKANTPGCTKQAEglsadEDTKRSkwtkklkkt     |
| 652 | 4.99E-13 | 210463622 | ref | YP_03266851.1   | merozole caping protein-1                                               | <i>Plasmodium falciparum</i>                                  | YFYPKDDTSGCTAEAlkaidrdbfbesGISPdekglraq  |
| 653 | 7.42E-15 | 197745682 | ref | YP_002169316.1  | bacterioferritin comigratory protein                                    | <i>Candidatus Liberibacter asiaticus</i> str. psy62           | SLSDFKGGKkNypkamipgpcivqagISIPDydgihrt   |
| 654 | 0        | 150025173 | ref | EDN35364.1      | hypothetical protein FTGC_01118                                         | <i>Francisella tularensis</i> subsp. novicida GA99-3549       | FFYPKANTPGCTAEACgvsadTQLKFKFKFNydgihrt   |
| 655 | 3.78E-16 | 149771714 | emb | CAL43188.1      | probable peroxidoredoxin                                                | <i>Flavobacterium psychrophilum</i> JIPO2/86                  | YFYPKDDTPGCTIEACgvsdsSHQRFAQKYNslnrlrs   |
| 656 | 0        | 81300751  | ref | YP_400959.1     | bacterioferritin comigratory protein                                    | <i>Synechococcus elongatus</i> PCC 6301                       | YFYPKDDTPGCTIEACgvsdsSHQRFAQKYNslnrlrs   |
| 657 | 0        | 56687120  | dbj | BAD80342.1      | bacterioferritin comigratory protein homolog                            | <i>Synechococcus elongatus</i> PCC 6301                       | YFYPKDDTPGCTIEACgvsdsSHQRFAQKYNslnrlrs   |
| 658 | 0        | 81169632  | db  | ABR57972.1      | bacterioferritin comigratory protein-like                               | <i>Synechococcus elongatus</i> PCC 6301                       | YFYPKDDTPGCTIEACgvsdsSHQRFAQKYNslnrlrs   |
| 659 | 0        | 166368834 | ref | YP_0016661107.1 | bacterioferritin comigratory protein                                    | <i>Microcystis aeruginosa</i> NIES-843                        | YFYPKDDTPGCTIEACgvsdsSHQRFAQKYNslnrlrs   |
| 660 | 8.07E-17 | 166091207 | dbj | BAG05915.1      | bacterioferritin comigratory protein                                    | <i>Microcystis aeruginosa</i> NIES-843                        | YFYPKDDTPGCTIEACgvsdsSHQRFAQKYNslnrlrs   |
| 661 | 4.49E-10 | 119510322 | ref | YP_01629458.1   | alkyl hydroperoxide reductase/ Thiol specific antioxidant/ Mal allergen | <i>Nodularia spumigena</i> CCY9414                            | YFYPKDDTPGCTIEACgvsdsSHQRFAQKYNslnrlrs   |
| 662 | 0        | 119465066 | db  | EAIV45967.1     | alkyl hydroperoxide reductase/ Thiol specific antioxidant/ Mal allergen | <i>Nodularia spumigena</i> CCY9414                            | YFYPKDDTPGCTIEACgvsdsSHQRFAQKYNslnrlrs   |
| 663 | 0        | 158334340 | ref | YP_001516512.1  | bacterioferritin comigratory protein                                    | <i>Acaerochloris marina</i> MBIC11017                         | YFYPRDNTPGCTKEACgvsdsSHQRFAQKYNslnrlrs   |
| 664 | 0        | 160914243 | ref | YP_02076464.1   | hypothetical protein EUBDOL_00253                                       | <i>Eubacterium dolichum</i> DSM 3991                          | YFYPKDNTPGCTKQACglskdsSHKRFKRYEymgvrfs   |
| 665 | 0        | 158433870 | db  | EDP12159.1      | hypothetical protein EUBDOL_00253                                       | <i>Eubacterium dolichum</i> DSM 3991                          | YFYPKDNTPGCTKQACglskdsSHKRFKRYEymgvrfs   |
| 666 | 0        | 58265152  | ref | XP_569732.1     | peroxidoredoxin                                                         | <i>Mannheimia haemolytica</i> PHL213                          | SLSQFAGKkVypkallpgctqacGISTDydgihrt      |
| 667 | 0        | 50259436  | db  | EAJL22109.1     | peroxidoredoxin                                                         | <i>Mannheimia haemolytica</i> PHL213                          | SLSQFAGKkVypkallpgctqacGISTDydgihrt      |
| 668 | 0        | 48477514  | ref | YP_023220.1     | peroxidoredoxin                                                         | <i>Cryptococcus neoformans</i> var. <i>neoformans</i> JEC21   | LPSIKLEljypkadijppctqacGLSKDaqkwwkaks    |
| 669 | 0        | 15893619  | ref | NP_346968.1     | peroxidoredoxin                                                         | <i>Cryptococcus neoformans</i> var. <i>neoformans</i> B-3501A | LPSIKLEljypkadijppctqacGLSKDaqkwwkaks    |
| 670 | 0        | 120405074 | ref | YP_954903.1     | peroxidoredoxin                                                         | <i>Cryptococcus neoformans</i> var. <i>neoformans</i> B-3501A | LPSIKLEljypkadijppctqacGLSKDaqkwwkaks    |
| 671 | 1.97E-10 | 194563761 | ref | YP_002098784.1  | peroxidoredoxin                                                         | <i>Cryptococcus neoformans</i> var. <i>neoformans</i> JEC21   | LPSIKLEljypkadijppctqacGLSKDaqkwwkaks    |
| 672 | 0        | 32473880  | db  | EAY69265.1      | peroxidoredoxin                                                         | <i>Cryptococcus neoformans</i> var. <i>neoformans</i> JEC21   | LPSIKLEljypkadijppctqacGLSKDaqkwwkaks    |
| 673 | 0        | 32444416  | emb | CAD744415.1     | peroxidoredoxin                                                         | <i>Cryptococcus neoformans</i> var. <i>neoformans</i> JEC21   | LPSIKLEljypkadijppctqacGLSKDaqkwwkaks    |
| 674 | 0        | 34540648  | ref | NP_905127.1     | peroxidoredoxin                                                         | <i>Cryptococcus neoformans</i> var. <i>neoformans</i> JEC21   | LPSIKLEljypkadijppctqacGLSKDaqkwwkaks    |
| 675 | 0        | 34396962  | db  | AAQ66026.1      | peroxidoredoxin                                                         | <i>Cryptococcus neoformans</i> var. <i>neoformans</i> JEC21   | LPSIKLEljypkadijppctqacGLSKDaqkwwkaks    |
| 676 | 0        | 86608016  | ref | YP_476778.1     | peroxidoredoxin                                                         | <i>Cryptococcus neoformans</i> var. <i>neoformans</i> JEC21   | LPSIKLEljypkadijppctqacGLSKDaqkwwkaks    |
| 677 | 0        | 8656558   | db  | ABD01515.1      | peroxidoredoxin                                                         | <i>Cryptococcus neoformans</i> var. <i>neoformans</i> JEC21   | LPSIKLEljypkadijppctqacGLSKDaqkwwkaks    |
| 678 | 0        | 88807182  | ref | YP_01122894.1   | peroxidoredoxin                                                         | <i>Cryptococcus neoformans</i> var. <i>neoformans</i> JEC21   | LPSIKLEljypkadijppctqacGLSKDaqkwwkaks    |
| 679 | 0        | 88768396  | db  | EAR19551.1      | peroxidoredoxin                                                         | <i>Cryptococcus neoformans</i> var. <i>neoformans</i> JEC21   | LPSIKLEljypkadijppctqacGLSKDaqkwwkaks    |
| 680 | 0        | 78188188  | ref | YP_378526.1     | peroxidoredoxin                                                         | <i>Cryptococcus neoformans</i> var. <i>neoformans</i> JEC21   | LPSIKLEljypkadijppctqacGLSKDaqkwwkaks    |
| 681 | 0        | 167582430 | ref | YP_02375304.1   | peroxidoredoxin                                                         | <i>Cryptococcus neoformans</i> var. <i>neoformans</i> JEC21   | LPSIKLEljypkadijppctqacGLSKDaqkwwkaks    |
| 682 | 0        | 167620520 | ref | YP_02389153.1   | peroxidoredoxin                                                         | <i>Cryptococcus neoformans</i> var. <i>neoformans</i> JEC21   | LPSIKLEljypkadijppctqacGLSKDaqkwwkaks    |
| 683 | 0        | 89069866  | ref | YP_01157298.1   | peroxidoredoxin                                                         | <i>Cryptococcus neoformans</i> var. <i>neoformans</i> JEC21   | LPSIKLEljypkadijppctqacGLSKDaqkwwkaks    |
| 684 | 0        | 89044414  | db  | EAR05045.1      | peroxidoredoxin                                                         | <i>Cryptococcus neoformans</i> var. <i>neoformans</i> JEC21   | LPSIKLEljypkadijppctqacGLSKDaqkwwkaks    |
| 685 | 0        | 146304080 | ref | YP_001191396.1  | peroxidoredoxin                                                         | <i>Cryptococcus neoformans</i> var. <i>neoformans</i> JEC21   | LPSIKLEljypkadijppctqacGLSKDaqkwwkaks    |
| 686 | 0        | 145702330 | db  | ABP95472.1      | peroxidoredoxin                                                         | <i>Cryptococcus neoformans</i> var. <i>neoformans</i> JEC21   | LPSIKLEljypkadijppctqacGLSKDaqkwwkaks    |
| 687 | 0        | 145219111 | ref | YP_001129820.1  | peroxidoredoxin                                                         | <i>Cryptococcus neoformans</i> var. <i>neoformans</i> JEC21   | LPSIKLEljypkadijppctqacGLSKDaqkwwkaks    |
| 688 | 0        | 145205225 | db  | ABP36318.1      | peroxidoredoxin                                                         | <i>Cryptococcus neoformans</i> var. <i>neoformans</i> JEC21   | LPSIKLEljypkadijppctqacGLSKDaqkwwkaks    |
| 689 | 0        | 90581623  | ref | YP_01237414.1   | peroxidoredoxin                                                         | <i>Cryptococcus neoformans</i> var. <i>neoformans</i> JEC21   | LPSIKLEljypkadijppctqacGLSKDaqkwwkaks    |
| 690 | 0        | 90437206  | db  | EA562406.1      | peroxidoredoxin                                                         | <i>Cryptococcus neoformans</i> var. <i>neoformans</i> JEC21   | LPSIKLEljypkadijppctqacGLSKDaqkwwkaks    |
| 691 | 0        | 207086699 | db  | EDZ63982.1      | peroxidoredoxin                                                         | <i>Cryptococcus neoformans</i> var. <i>neoformans</i> JEC21   | LPSIKLEljypkadijppctqacGLSKDaqkwwkaks    |
| 692 | 0        | 75675862  | ref | YP_318283.1     | peroxidoredoxin                                                         | <i>Cryptococcus neoformans</i> var. <i>neoformans</i> JEC21   | LPSIKLEljypkadijppctqacGLSKDaqkwwkaks    |
| 693 | 0        | 74420732  | db  | ABA04931.1      | peroxidoredoxin                                                         | <i>Cryptococcus neoformans</i> var. <i>neoformans</i> JEC21   | LPSIKLEljypkadijppctqacGLSKDaqkwwkaks    |

|     |          |               |                |                                                                                              |                                                       |                                         |
|-----|----------|---------------|----------------|----------------------------------------------------------------------------------------------|-------------------------------------------------------|-----------------------------------------|
| 680 | 3.49E-14 | 119961376 ref | YP_949205.1    | bacterioferritin comigratory protein (thioredoxin reductase)                                 | Arthro bacter aureescens TC1                          | YFYKAAATPGCTTTEACgspvdVEGLVRSghvqalkeel |
| 681 | 1.63E-15 | 119949235 db  | ABM07146.1     | bacterioferritin comigratory protein (thioredoxin reductase)                                 | Arthro bacter aureescens TC1                          | YFYKNDNTSGCTLEAGlskdSHKKFIEKFIHymgtbvs  |
| 682 | 2.36E-11 | 160943861 ref | YP_02094164.1  | hypothetical protein PEPMIC_00922                                                            | Peptostreptococcus micros ATCC 33270                  | YFYKNDNTSGCTLEAGlskdSHKKFIEKFIHymgtbvs  |
| 683 | 0        | 158447345 gb  | EDP24340.1     | hypothetical protein PEPMIC_00922                                                            | Peptostreptococcus micros ATCC 33270                  | YFYKNDNTSGCTLEAGlskdSHKKFIEKFIHymgtbvs  |
| 684 | 0        | 146299803 ref | YP_02379980.1  | alkyl hydroperoxide reductase/Thiol specific antioxidant/ Mai allergen                       | Burkholderia ubonensis Bu                             | YFYPAAFTKGCTTEAIGvsadPALDRAslspdkhven   |
| 685 | 0        | 146299803 ref | YP_02379980.1  | alkyl hydroperoxide reductase/Thiol specific antioxidant/ Mai allergen                       | Burkholderia ubonensis Bu                             | YFYKNDNTSGCTTEAIGvsadPALDRAslspdkhven   |
| 686 | 0        | 146152449 db  | ABO003303.1    | alkyl hydroperoxide reductase/Thiol specific antioxidant/ Mai allergen                       | Flavobacterium johnsoniae UW101                       | YFYKDDTTPGCTLEAKgsrdGHASFKAKYSymgiert   |
| 687 | 0        | 58584387 ref  | YP_197060.1    | peroxiredoxin                                                                                | Wobaschia endosymbiont strain TRS of Brugia malayi    | YFYKDDTTPGCTLEAKgsrdGHASFKAKYSymgiert   |
| 688 | 0        | 58118703 gb   | AAW70718.1     | peroxiredoxin                                                                                | Wobaschia endosymbiont strain TRS of Brugia malayi    | YFYKDDTTPGCTLEAKgsrdGHASFKAKYSymgiert   |
| 689 | 2.90E-11 | 170703026 ref | ZP_02893885.1  | alkyl hydroperoxide reductase/Thiol specific antioxidant/ Mai allergen                       | Burkholderia ambifera IOP40-10                        | YFYPAAFTKGCTTEAIGvsadPALDRAslspdkhven   |
| 690 | 0        | 170132067 db  | EDT00566.1     | alkyl hydroperoxide reductase/Thiol specific antioxidant/ Mai allergen                       | Burkholderia ambifera IOP40-10                        | YFYKDDTTPGCTLEAKgsrdGHASFKAKYSymgiert   |
| 691 | 6.37E-15 | 163703579 db  | ZP_02122408.1  | alkyl hydroperoxide reductase/Thiol specific antioxidant/ Mai allergen                       | Methylobacterium nodulans ORS 2060                    | YFYKDDTTPGCTLEAKgsrdGHASFKAKYSymgiert   |
| 692 | 0        | 162430268 gb  | EDO40883.1     | alkyl hydroperoxide reductase/Thiol specific antioxidant/ Mai allergen                       | Methylobacterium nodulans ORS 2060                    | YFYKDDTTPGCTLEAKgsrdGHASFKAKYSymgiert   |
| 693 | 0        | 33860639 ref  | NP_892200.1    | putative bacterioferritin comigratory (BCP) protein                                          | Prochlorococcus marinus subsp. pastoris str. CCMP1986 | YFYKDDTTPGCTLEAKgsrdGHASFKAKYSymgiert   |
| 694 | 0        | 33633581 femb | CAE16538.1     | putative bacterioferritin comigratory (BCP) protein                                          | Prochlorococcus marinus subsp. pastoris str. CCMP1986 | YFYKDDTTPGCTLEAKgsrdGHASFKAKYSymgiert   |
| 695 | 0        | 149181279 ref | ZP_01859777.1  | bacterioferritin comigratory protein                                                         | Bacillus sp. SG-1                                     | YFYKDDTTPGCTLEAKgsrdGHASFKAKYSymgiert   |
| 696 | 0        | 148851004 gb  | EDL65156.1     | bacterioferritin comigratory protein                                                         | Bacillus sp. SG-1                                     | YFYKDDTTPGCTLEAKgsrdGHASFKAKYSymgiert   |
| 697 | 0        | 86153867 ref  | ZP_01072070.1  | bacterioferritin comigratory protein Bcp                                                     | Campylobacter jejuni subsp. jejuni HB93-13            | YFYKDDTTPGCTLEAKgsrdGHASFKAKYSymgiert   |
| 698 | 0        | 121612655 ref | YP_999986.1    | anti-oxidant AhpC/TSA family protein                                                         | Campylobacter jejuni subsp. jejuni 81-1176            | YFYKDDTTPGCTLEAKgsrdGHASFKAKYSymgiert   |
| 699 | 0        | 157414588 ref | YP_001481824.1 | anti-oxidant AhpC/TSA family protein                                                         | Campylobacter jejuni subsp. jejuni 81-1176            | YFYKDDTTPGCTLEAKgsrdGHASFKAKYSymgiert   |
| 700 | 0        | 167004943 ref | ZP_02270701.1  | antioxidant. AhpC/Tsa family protein                                                         | Campylobacter jejuni subsp. jejuni 81-176             | YFYKDDTTPGCTLEAKgsrdGHASFKAKYSymgiert   |
| 701 | 0        | 85942828 gb   | EAQ60040.1     | bacterioferritin comigratory protein Bcp                                                     | Campylobacter jejuni subsp. jejuni 81-176             | YFYKDDTTPGCTLEAKgsrdGHASFKAKYSymgiert   |
| 702 | 0        | 87250364 gb   | EAQ73322.1     | antioxidant. AhpC/Tsa family                                                                 | Campylobacter jejuni subsp. jejuni 81-176             | YFYKDDTTPGCTLEAKgsrdGHASFKAKYSymgiert   |
| 703 | 0        | 157388552 db  | ABV51847.1     | antioxidant. AhpC/Tsa family                                                                 | Campylobacter jejuni subsp. jejuni 81-1116            | YFYKDDTTPGCTLEAKgsrdGHASFKAKYSymgiert   |
| 704 | 2.90E-11 | 107028957 ref | YP_626052.1    | alkyl hydroperoxide reductase/Thiol specific antioxidant/ Mai allergen                       | Burkholderia cenocepacia AU1054                       | YFYKDDTTPGCTLEAKgsrdGHASFKAKYSymgiert   |
| 705 | 0        | 116889885 ref | YP_835506.1    | alkyl hydroperoxide reductase/Thiol specific antioxidant/ Mai allergen                       | Burkholderia cenocepacia H12424                       | YFYKDDTTPGCTLEAKgsrdGHASFKAKYSymgiert   |
| 706 | 0        | 170793224 ref | YP_001765171.1 | alkyl hydroperoxide reductase/Thiol specific antioxidant/ Mai allergen                       | Burkholderia cenocepacia AU1054                       | YFYKDDTTPGCTLEAKgsrdGHASFKAKYSymgiert   |
| 707 | 0        | 105899121 gb  | ABF81079.1     | alkyl hydroperoxide reductase/Thiol specific antioxidant/ Mai allergen                       | Burkholderia cenocepacia MC0-3                        | YFYKDDTTPGCTLEAKgsrdGHASFKAKYSymgiert   |
| 708 | 0        | 116647974 gb  | ACR08615.1     | alkyl hydroperoxide reductase/Thiol specific antioxidant/ Mai allergen                       | Burkholderia cenocepacia AU1054                       | YFYKDDTTPGCTLEAKgsrdGHASFKAKYSymgiert   |
| 709 | 0        | 169816466 gb  | ACA91049.1     | alkyl hydroperoxide reductase/Thiol specific antioxidant/ Mai allergen                       | Burkholderia cenocepacia H12424                       | YFYKDDTTPGCTLEAKgsrdGHASFKAKYSymgiert   |
| 710 | 1.90E-12 | 121708436 ref | XP_001271480.1 | disrupter of telomere silencing protein Dots5, putative                                      | Aspergillus clavatus NRRL 1                           | YFYKDDTTPGCTLEAKgsrdGHASFKAKYSymgiert   |
| 711 | 4.35E-09 | 92114934 db   | EAWU0054.1     | disrupter of telomere silencing protein Dots5, putative                                      | Aspergillus clavatus NRRL 1                           | YFYKDDTTPGCTLEAKgsrdGHASFKAKYSymgiert   |
| 712 | 0        | 917698024 gb  | ABE60163.1     | alkyl hydroperoxide reductase/Thiol specific antioxidant/ Mai allergen                       | Chromohalobacter salexigenis DSM 3043                 | YFYKDDTTPGCTLEAKgsrdGHASFKAKYSymgiert   |
| 713 | 1.32E-13 | 274964845 ref | NP_765102.1    | hypothetical protein SE1547                                                                  | Chromohalobacter salexigenis DSM 3043                 | YFYKDDTTPGCTLEAKgsrdGHASFKAKYSymgiert   |
| 714 | 0        | 17318012 gb   | AAO05146.1     | AE016749_92 conserved hypothetical protein                                                   | Staphylococcus epidermidis ATCC 12228                 | YFYKDDTTPGCTLEAKgsrdGHASFKAKYSymgiert   |
| 715 | 1.36E-14 | 169174465 ref | NP_02863666.1  | alkyl hydroperoxide reductase/Thiol specific antioxidant/ Mai allergen                       | Staphylococcus epidermidis ATCC 12228                 | YFYKDDTTPGCTLEAKgsrdGHASFKAKYSymgiert   |
| 716 | 0        | 16917372 gb   | EDS563851.1    | alkyl hydroperoxide reductase/Thiol specific antioxidant/ Mai allergen                       | Arthro bacter chlorophenolicus A6                     | YFYKDDTTPGCTLEAKgsrdGHASFKAKYSymgiert   |
| 717 | 2.57E-16 | 16272212 ref  | NP_438423.1    | thioredoxin-dependent thiol peroxidase                                                       | Arthro bacter chlorophenolicus A6                     | YFYKDDTTPGCTLEAKgsrdGHASFKAKYSymgiert   |
| 718 | 0        | 1168620 sp    | P44411.1       | BCP_HAEIN RecName: Full=Putative peroxiredoxin bcp; AINName: Full=Putative peroxiredoxin bcp | Haemophilus influenzae Rd KW20                        | YFYKDDTTPGCTLEAKgsrdGHASFKAKYSymgiert   |
| 719 | 1.72E-13 | 21587329 emb  | CAP85369.1     | bacterioferritin comigratory protein (bcp)                                                   | Haemophilus influenzae Rd KW20                        | YFYKDDTTPGCTLEAKgsrdGHASFKAKYSymgiert   |
| 720 | 2.25E-14 | 17229895 ref  | NP_486543.1    | bacterioferritin comigratory protein                                                         | Penicillium chrysogenum Wisconsin 54-1255             | YFYKDDTTPGCTLEAKgsrdGHASFKAKYSymgiert   |
| 721 | 0        | 17131595 dbj  | BA874202.1     | bacterioferritin comigratory protein                                                         | Penicillium chrysogenum Wisconsin 54-1255             | YFYKDDTTPGCTLEAKgsrdGHASFKAKYSymgiert   |
| 722 | 3.65E-14 | 159030070 emb | CA090390.1     | unnamed protein product                                                                      | Penicillium chrysogenum Wisconsin 54-1255             | YFYKDDTTPGCTLEAKgsrdGHASFKAKYSymgiert   |
| 723 | 8.82E-12 | 194365287 ref | YP_002027897.1 | alkyl hydroperoxide reductase/Thiol specific antioxidant/ Mai allergen                       | Microcystis aeruginosa PCC 7806                       | YFYKDDTTPGCTLEAKgsrdGHASFKAKYSymgiert   |
| 724 | 0        | 194348001 gb  | ACF51214.1     | alkyl hydroperoxide reductase/Thiol specific antioxidant/ Mai allergen                       | Stenotrophomonas maltophilia R551-3                   | YFYKDDTTPGCTLEAKgsrdGHASFKAKYSymgiert   |
| 725 | 0        | 118894620 ref | ZP_01551967.1  | alkyl hydroperoxide reductase/Thiol specific antioxidant/ Mai allergen                       | Stenotrophomonas maltophilia R551-3                   | YFYKDDTTPGCTLEAKgsrdGHASFKAKYSymgiert   |
| 726 | 0        | 118440398 ref | EAU47025.1     | alkyl hydroperoxide reductase/Thiol specific antioxidant/ Mai allergen                       | Methylophilates bacterium HTCC2181                    | YFYKDDTTPGCTLEAKgsrdGHASFKAKYSymgiert   |
| 727 | 0        | 167624247 ref | YP_001674541.1 | alkyl hydroperoxide reductase/Thiol specific antioxidant/ Mai allergen                       | Methylophilates bacterium HTCC2181                    | YFYKDDTTPGCTLEAKgsrdGHASFKAKYSymgiert   |
| 728 | 0        | 94969842 ref  | YP_591890.1    | alkyl hydroperoxide reductase/Thiol specific antioxidant/ Mai allergen                       | Shewanella halifaxensis HAW-EB4                       | YFYKDDTTPGCTLEAKgsrdGHASFKAKYSymgiert   |
| 729 | 0        | 94551892 gb   | ABF41816.1     | alkyl hydroperoxide reductase/Thiol specific antioxidant/ Mai allergen                       | Shewanella halifaxensis HAW-EB4                       | YFYKDDTTPGCTLEAKgsrdGHASFKAKYSymgiert   |
| 730 | 0        | 91216361 ref  | ZP_01295328.1  | alkyl hydroperoxide reductase/Thiol specific antioxidant/ Mai allergen                       | Acidobacteria bacterium Ellin345                      | YFYKDDTTPGCTLEAKgsrdGHASFKAKYSymgiert   |
| 731 | 0        | 91184599 gb   | EA571875.1     | bacterioferritin comigratory protein, thiol peroxidase, putative                             | Acidobacteria bacterium Ellin345                      | YFYKDDTTPGCTLEAKgsrdGHASFKAKYSymgiert   |
| 732 | 0        | 15805872 ref  | NP_294570.1    | bacterioferritin comigratory protein                                                         | Psychrotrolexus torquus ATCC 700795                   | YFYKDDTTPGCTLEAKgsrdGHASFKAKYSymgiert   |
| 733 | 0        | 6458565 gb    | AAF10425.1     | AE001939_2 bacterioferritin comigratory protein                                              | Deinococcus radiodurans R1                            | YFYKDDTTPGCTLEAKgsrdGHASFKAKYSymgiert   |
| 734 | 0        | 197626694 gb  | EDY39263.1     | redoxin domain-containing protein                                                            | Deinococcus radiodurans R1                            | YFYKDDTTPGCTLEAKgsrdGHASFKAKYSymgiert   |
| 735 | 0        | 120403797 ref | YP_953626.1    | redoxin domain-containing protein                                                            | Cyanobacterium sp. PCC 7001                           | YFYKDDTTPGCTLEAKgsrdGHASFKAKYSymgiert   |
| 736 | 0        | 119958615 gb  | ABM13620.1     | Redoxin domain protein                                                                       | Mycobacterium vanbaalenii PYR-1                       | YFYKDDTTPGCTLEAKgsrdGHASFKAKYSymgiert   |
| 737 | 0        | 212713871 ref | ZP_03321999.1  | hypothetical protein BIFPSEUDO_00913                                                         | Mycobacterium vanbaalenii PYR-1                       | YFYKDDTTPGCTLEAKgsrdGHASFKAKYSymgiert   |
| 738 | 0        | 212689946 gb  | EE849474.1     | hypothetical protein BIFPSEUDO_00913                                                         | Bifidobacterium pseudocalenulatum DSM 20438           | YFYKDDTTPGCTLEAKgsrdGHASFKAKYSymgiert   |
| 739 | 2.39E-14 | 148653565 ref | YP_001280668.1 | alkyl hydroperoxide reductase/Thiol specific antioxidant/ Mai allergen                       | Bifidobacterium pseudocalenulatum DSM 20438           | YFYKDDTTPGCTLEAKgsrdGHASFKAKYSymgiert   |
| 740 | 0        | 148572649 gb  | ABQ94708.1     | alkyl hydroperoxide reductase/Thiol specific antioxidant/ Mai allergen                       | Psychrobacter sp. Prwf-1                              | YFYKDDTTPGCTLEAKgsrdGHASFKAKYSymgiert   |
| 741 | 0        | 206802972 ref | EDJ39452.1     | Peroxioredoxin                                                                               | Leptospirillum sp. Group II '5-way CG'                | YFYKDDTTPGCTLEAKgsrdGHASFKAKYSymgiert   |
| 742 | 0        | 119963026 ref | YP_948239.1    | bacterioferritin comigratory protein (thioredoxin reductase)                                 | Arthro bacter aureescens TC1                          | YFYKDDTTPGCTLEAKgsrdGHASFKAKYSymgiert   |
| 743 | 0        | 119949885 gb  | ABM08796.1     | bacterioferritin comigratory protein (thioredoxin reductase)                                 | Arthro bacter aureescens TC1                          | YFYKDDTTPGCTLEAKgsrdGHASFKAKYSymgiert   |
| 744 | 2.92E-11 | 146303144 ref | YP_001190460.1 | alkyl hydroperoxide reductase/Thiol specific antioxidant/ Mai allergen                       | Metallosphaera sedula DSM 5348                        | YFYKDDTTPGCTLEAKgsrdGHASFKAKYSymgiert   |
| 745 | 0        | 145701394 gb  | ABP94536.1     | alkyl hydroperoxide reductase/Thiol specific antioxidant/ Mai allergen                       | Metallosphaera sedula DSM 5348                        | YFYKDDTTPGCTLEAKgsrdGHASFKAKYSymgiert   |
| 746 | 0        | 54310025 ref  | YP_131045.1    | thioredoxin-dependent thiol peroxidase                                                       | Photobacterium profundum SS9                          | YFYKDDTTPGCTLEAKgsrdGHASFKAKYSymgiert   |
| 747 | 0        | 46914464 femb | CAG21243.1     | Putative bacterioferritin comigratory protein                                                | Photobacterium profundum SS9                          | YFYKDDTTPGCTLEAKgsrdGHASFKAKYSymgiert   |



|     |          |           |     |                |                                                                         |                                                                |                                              |
|-----|----------|-----------|-----|----------------|-------------------------------------------------------------------------|----------------------------------------------------------------|----------------------------------------------|
| 713 | 0        | 4619.1185 | ref | ZP_00120284.2  | COG1225: Peroxiredoxin                                                  | Bifidobacterium longum DJ1010A                                 | YFYPAAMTPGCTTEACGhlarlasknrvGVSKDhvgvirs     |
|     |          | 189439420 | ref | YP_001954501.1 | Peroxiredoxin                                                           | Bifidobacterium longum DJ1010A                                 |                                              |
|     |          | 189427855 | gb  | ACD98003.1     | Peroxiredoxin                                                           | Bifidobacterium longum DJ1010A                                 |                                              |
| 714 | 2.93E-15 | 189184183 | ref | YP_001937918.1 | peroxiredoxin, AhpC/ TSA family protein                                 | Orientia tsutsugamushi str. Ikeda                              | YFYPKDNTPGCTTIEAGyyskshQKFKDKLClkqkllaa      |
|     |          | 189184167 | ref | YP_001937952.1 | peroxiredoxin, AhpC/ TSA family protein                                 | Orientia tsutsugamushi str. Ikeda                              |                                              |
|     |          | 189184810 | ref | YP_001938595.1 | peroxiredoxin, AhpC/ TSA family protein                                 | Orientia tsutsugamushi str. Ikeda                              |                                              |
|     |          | 189180904 | dbj | BA640684.1     | peroxiredoxin, AhpC/ TSA family protein                                 | Orientia tsutsugamushi str. Ikeda                              |                                              |
|     |          | 189180938 | dbj | BA640674.1     | peroxiredoxin, AhpC/ TSA family protein                                 | Orientia tsutsugamushi str. Ikeda                              |                                              |
|     |          | 189181581 | dbj | BA641361.1     | peroxiredoxin, AhpC/ TSA family protein                                 | Orientia tsutsugamushi str. Ikeda                              |                                              |
| 715 | 2.80E-17 | 75910085  | ref | YP_324381.1    | alkyl hydroperoxide reductase/ Thiol specific antioxidant/ Mal allergen | Anabaena variabilis ATCC 29413                                 | LPAQNGSfyfypkddtbgctaeascGVSDGshqkfkaskyn    |
|     |          | 75910085  | gb  | ABA230486.1    | alkyl hydroperoxide reductase/ Thiol specific antioxidant/ Mal allergen | Anabaena variabilis ATCC 29413                                 |                                              |
| 716 | 0        | 75108545  | sp  | G551156.1      | PRXQ_WHEAT ReName: Full=Peroxiredoxin Q, chloroplastic; AINA            | Triticum aestivum                                              | AFASAFAYypadeipgkckqecGISGSdshakafaky        |
|     |          | 55633012  | db  | AAV66923.1     | peroxiredoxin Q                                                         | Triticum aestivum                                              |                                              |
| 717 | 0        | 16383382  | ref | YP_001624187.1 | thioredoxin peroxidase                                                  | Renibacterium salmoninarum ATCC 33209                          | YFYPAASITPGCTKEACgispdLALSKFTIEAEsvglirs     |
|     |          | 162953258 | gb  | ABT727173.1    | thioredoxin peroxidase                                                  | Renibacterium salmoninarum ATCC 33209                          |                                              |
| 718 | 0        | 212828335 | ref | ZP_03489389.1  | hypothetical protein EUBIFOR_01978                                      | Eubacterium bifforme DSM 3989                                  | YFYPKDNTAGCTKOACgysvskidSHKFKQERYGeesglvr    |
|     |          | 218215609 | gb  | EEC68947.1     | hypothetical protein EUBIFOR_01978                                      | Eubacterium bifforme DSM 3989                                  |                                              |
| 719 | 3.26E-11 | 171184575 | ref | YP_001793494.1 | alkyl hydroperoxide reductase/ Thiol specific antioxidant/ Mal allergen | Thermoproteus neutrophilus V25A1a                              | YFFKAFITQGTRETVYgvmTLLRRFAERYKqglvr          |
|     |          | 170933378 | gb  | AC839048.1     | alkyl hydroperoxide reductase/ Thiol specific antioxidant/ Mal allergen | Thermoproteus neutrophilus V25A1a                              |                                              |
| 720 | 3.30E-10 | 153893828 | ref | ZP_02014435.1  | alkyl hydroperoxide reductase/ Mal allergen                             | Opitulaeae bacterium TV2                                       | FFYPKAFITGGCTAQSCyvaliyvTQRRFKENRhlad        |
|     |          | 151980101 | gb  | EDN44047.1     | alkyl hydroperoxide reductase/ Thiol specific antioxidant/ Mal allergen | Opitulaeae bacterium TV2                                       |                                              |
| 721 | 0        | 116778913 | gb  | ABK21053.1     | unknown                                                                 | Picea sitchensis                                               | SVSYAPbvkvsSLSKFKGKPyfypadespgckkeac         |
|     |          | 215264425 | gb  | AC164204.1     | bacterioferritin comigratory protein                                    | Synechococcus sp. JA-3-3Ab                                     | YFYPRDNTPGCTREACgysadSHQKFAQKLQynglht        |
| 722 | 0        | 66060785  | ref | YP_475548.1    | bacterioferritin comigratory protein                                    | Synechococcus sp. JA-3-3Ab                                     | FCGKILSslskfgyypAYFPADETPGCTKOACGaisgd       |
| 723 | 0        | 215264425 | gb  | AC164204.1     | bacterioferritin comigratory protein                                    | Salicornia herbacea                                            | YFFPKADITPGCTTEACgysvsmDQKRFARKYHflgnara     |
| 724 | 1.06E-11 | 206601927 | gb  | EDJ28409.1     | putative peroxiredoxin                                                  | Leptosiphium sp. Group II '5-way CG'                           | YFYPKDDITPGCTKEACgysvsmDHOAFITSKYAesgklq     |
| 725 | 0        | 37521944  | ref | NP_925321.1    | bacterioferritin comigratory protein                                    | Gloeobacter violaceus PCC 7421                                 |                                              |
|     |          | 35212943  | dbj | BAC690316.1    | glr2375                                                                 | Gloeobacter violaceus PCC 7421                                 |                                              |
| 726 | 0        | 116779547 | gb  | ABK21333.1     | unknown                                                                 | Picea sitchensis                                               | PPVKLVSVfypadeipgckkeacGISGSoslnakafaky      |
| 727 | 9.45E-16 | 24216141  | ref | NP_713622.1    | bacterioferritin comigratory protein                                    | Leptospira interrogans serovar Lai str. 56601                  | YFYPKDQITPGCTTEACgysvskidSHQKFKIEKQEEadgkllk |
|     |          | 45656628  | ref | YP_000714.1    | bacterioferritin comigratory protein                                    | Leptospira interrogans serovar Copenhageni str. Fluoruz L1-130 |                                              |
|     |          | 45699633  | gb  | AA506840.1     | AE011502_4 Bacterioferritin comigratory protein                         | Leptospira interrogans serovar Lai str. 56601                  |                                              |
| 728 | 2.06E-11 | 45999633  | gb  | AA506840.1     | bacterioferritin comigratory protein                                    | Leptospira interrogans serovar Copenhageni str. Fluoruz L1-130 | YFYPKDDITPGCTTEAlgyvskidHKFRDKHPEpdgvlrq     |
|     |          | 63853309  | gb  | EA091161.1     | bacterioferritin comigratory protein                                    | Oceanicola alexandrii HTC2633                                  |                                              |
| 729 | 2.65E-11 | 186682733 | ref | YP_001866929.1 | alkyl hydroperoxide reductase/ Thiol specific antioxidant/ Mal allergen | Nectoc punctiforme PCC 73102                                   | LGGKLPAlfyfypkdfitsgclaeacGVSA DSshaktoesag  |
|     |          | 186465185 | gb  | ACC80986.1     | alkyl hydroperoxide reductase/ Thiol specific antioxidant/ Mal allergen | Nectoc punctiforme PCC 73102                                   |                                              |
| 730 | 3.07E-11 | 78066634  | ref | YP_369403.1    | alkyl hydroperoxide reductase/ Thiol specific antioxidant/ Mal allergen | Burkholderia sp. 383                                           | SLSIDLKGKLLfyfypmfsgeclklacGISDPpklrfrk      |
|     |          | 170704290 | ref | ZP_02894835.1  | alkyl hydroperoxide reductase/ Thiol specific antioxidant/ Mal allergen | Burkholderia sp. 383                                           |                                              |
|     |          | 77967379  | gb  | ABB08759.1     | alkyl hydroperoxide reductase/ Thiol specific antioxidant/ Mal allergen | Burkholderia ambifaria IOP40-10                                |                                              |
| 731 | 6.32E-12 | 170130801 | gb  | EDS99583.1     | alkyl hydroperoxide reductase/ Thiol specific antioxidant/ Mal allergen | Burkholderia ambifaria IOP40-10                                | YFYPKDNTPGCTTEAMgysvrdSHDKFKQNLVxgjlrs       |
|     |          | 124266731 | ref | YP_001020735.1 | alkyl hydroperoxide reductase/ Thiol specific antioxidant/ Mal allergen | Burkholderia ambifaria IOP40-10                                |                                              |
| 733 | 3.26E-12 | 39972403  | ref | XP_367592.1    | putative bacterioferritin comigratory oxidoreductase protein            | Methylobium petroleiphilium PM1                                | KPAKSKStfypkalkipgckkqacGLSADaekkeakeeke     |
|     |          | 142529506 | gb  | ABM94900.1     | putative bacterioferritin comigratory oxidoreductase protein            | Methylobium petroleiphilium PM1                                |                                              |
|     |          | 145016698 | gb  | EDK01128.1     | hypothetical protein MSG_07503                                          | Magnaporthe grisea 70-15                                       | PLUMLKDQNGfyfypkddipgclmeacGVSGDLaalrk       |
| 734 | 2.00E-13 | 87320292  | ref | ZP_01085117.1  | putative bacterioferritin comigratory protein                           | Synechococcus sp. WH 5701                                      |                                              |
|     |          | 8728321   | gb  | EA076173.1     | putative bacterioferritin comigratory protein                           | Synechococcus sp. WH 5701                                      | VLSTFKKLLfyfypmfsgeclklacGISDPpklrfrk        |
| 735 | 2.13E-13 | 206874376 | ref | ZP_03235293.1  | peroxiredoxin Q                                                         | Bacillus cereus H5081_97                                       |                                              |
|     |          | 206747616 | gb  | EDJ290006.1    | peroxiredoxin Q                                                         | Bacillus cereus H5081_97                                       |                                              |
| 736 | 1.08E-11 | 113476304 | ref | YP_722365.1    | redoxin                                                                 | Trichodesmium erythraeum IMS101                                | YFYPKDFTSGCTTEARgvsadSHQEFCDSEGnpggllq       |
|     |          | 110167352 | gb  | ABG51892.1     | redoxin                                                                 | Trichodesmium erythraeum IMS101                                |                                              |
| 738 | 1.91E-14 | 117924770 | ref | YP_865387.1    | alkyl hydroperoxide reductase/ Thiol specific antioxidant/ Mal allergen | Magnatococcus sp. MC-1                                         | YFYPKDNTPGCTTEAGglskshHTNFIKSDYDmgjlrs       |
|     |          | 117608526 | gb  | ABK43981.1     | alkyl hydroperoxide reductase/ Thiol specific antioxidant/ Mal allergen | Magnatococcus sp. MC-1                                         |                                              |
| 739 | 0        | 170718060 | ref | YP_001785098.1 | alkyl hydroperoxide reductase/ Thiol specific antioxidant/ Mal allergen | Haemophilus sordii 2336                                        | YFYPKALITPGCTKOACgispklANFLIEKKAfdglrfr      |
|     |          | 168826189 | gb  | ACA31560.1     | alkyl hydroperoxide reductase/ Thiol specific antioxidant/ Mal allergen | Haemophilus sordii 2336                                        |                                              |
| 740 | 0        | 182951425 | gb  | ZP_03495958.1  | alkyl hydroperoxide reductase/ Thiol specific antioxidant/ Mal allergen | Thermus aquaticus Y51MC23                                      | YFYPKDDITPGCTKEACgysvsmSHKRFRAEKELygdhri     |
|     |          | 218244325 | gb  | EED10850.1     | alkyl hydroperoxide reductase/ Thiol specific antioxidant/ Mal allergen | Thermus aquaticus Y51MC23                                      |                                              |
| 741 | 0        | 12707621  | ref | ZP_03315749.1  | hypothetical protein PROV/RUST_02566                                    | Providencia rustigianii DSM 4541                               | YFYPKAMITPGCTVQACglsrdKLARFAEKELygdhri       |
|     |          | 12677882  | gb  | EEB38479.1     | hypothetical protein PROV/RUST_02566                                    | Providencia rustigianii DSM 4541                               |                                              |
| 742 | 0        | 89074982  | ref | ZP_01161742.1  | bacterioferritin comigratory protein                                    | Photobacterium sp. SKA34                                       | SLSIDFKGKLYfypkamitpgclvtqad.GISIDAgwgl      |
|     |          | 89049221  | gb  | EAR54785.1     | bacterioferritin comigratory protein                                    | Photobacterium sp. SKA34                                       |                                              |
| 743 | 6.95E-12 | 86609632  | ref | YP_478394.1    | putative peroxiredoxin                                                  | Synechococcus sp. JA-2-3B aJ(2-13)                             | YFYPRDFTSGCTTEARgvsadSHRRFCSAEGpegjlre       |
|     |          | 86658174  | gb  | ABD003131.1    | putative peroxiredoxin                                                  | Synechococcus sp. JA-2-3B aJ(2-13)                             |                                              |
| 745 | 0        | 160894320 | ref | ZP_02075097.1  | hypothetical protein CLO1250_01873                                      | Clostridium sp. L2-50                                          | YFYPKDNTPGCTKOACgysvskidSHKRFEEKYGeegllk     |
|     |          | 156864021 | gb  | EDO57452.1     | hypothetical protein CLO1250_01873                                      | Clostridium sp. L2-50                                          |                                              |
| 746 | 0        | 11846704  | ref | YP_880887.1    | alkyl hydroperoxide reductase/ Thiol specific antioxidant/ Mal allergen | Mycobacterium avium 104                                        | YFYPAASITPGCTKOACgispklAKLFRDAEKYvgvirs      |
|     |          | 118168328 | gb  | ABK69225.1     | alkyl hydroperoxide reductase/ Thiol specific antioxidant/ Mal allergen | Mycobacterium avium 104                                        |                                              |
| 747 | 2.37E-12 | 71908682  | ref | YP_284449.1    | alkyl hydroperoxide reductase/ Thiol specific antioxidant/ Mal allergen | Dechloromonas aromatica RCB                                    | YFYPKDSTPGCTTQGGglsrdSHENFKAKQEVgjlrs        |
|     |          | 71846483  | gb  | AAZ45979.1     | alkyl hydroperoxide reductase/ Thiol specific antioxidant/ Mal allergen | Dechloromonas aromatica RCB                                    |                                              |
| 748 | 6.27E-11 | 110634138 | ref | YP_674346.1    | alkyl hydroperoxide reductase/ Thiol specific antioxidant/ Mal allergen | Mesorhizobium sp. BNC1                                         | YFYPKDDITSGCTAAAlgspsdSHDKFKAKHDLdaegri      |
|     |          | 110285122 | gb  | ABG63181.1     | alkyl hydroperoxide reductase/ Thiol specific antioxidant/ Mal allergen | Mesorhizobium sp. BNC1                                         |                                              |

|     |          |               |                |                                                                         |                                             |                                               |
|-----|----------|---------------|----------------|-------------------------------------------------------------------------|---------------------------------------------|-----------------------------------------------|
| 749 | 4.03E-10 | 120554612 ref | YP_958993.1    | alkyl hydroperoxide reductase/ Thiol specific antioxidant/ Mal allergen | Marinobacter aquaeolei VT8                  | YFYPKDNTPGCTTGGGQyvsrdkKLLKLYGKEHkegvir       |
| 750 | 4.00E-12 | 85716322 ref  | ABM18776.1     | alkyl hydroperoxide reductase/ Thiol specific antioxidant/ Mal allergen | Marinobacter aquaeolei VT8                  | FFYPRAGTTPGCTREAlIakafaaagktGV/SADagIari      |
| 752 | 7.44E-16 | 150004915 ref | YP_001299699.1 | alkyl hydroperoxide reductase/ Thiol specific antioxidant/ Mal allergen | Nitrobacter sp. Nb-311A                     | YFYPKDMITSGCTAAQACgyspdIAcyaefraGVSNshqkIekne |
| 753 | 0        | 117928889 ref | YP_873440.1    | putative bacterioferritin co-migratory protein                          | Bacteroides vulgatus ATCC 8482              | YFYPAAMTTPGCTTEACgjspspdKLAkERDAYHvmgvis      |
| 754 | 4.39E-13 | 147920236 ref | YP_685997.1    | redoxin domain protein                                                  | Bacteroides vulgatus ATCC 8482              | VFYPADSPVCYVDELAgisvdsHQAFKAKSRNgdIjrw        |
| 755 | 3.19E-11 | 73541684 ref  | CAJ38671.1     | putative 1-cysteine peroxidoxin                                         | Acidothermus cellulolyticus 11B             | PVTDGdVykdnptgctteamVFGISRDShenIakle          |
| 756 | 0        | 196242352 ref | AA261360.1     | alkyl hydroperoxide reductase/ Thiol specific antioxidant/ Mal allergen | Ralstonia eutropha JMP134                   | YFYPRDNTPGCTKEACgyspdAHQKFAQKYDlqIwq          |
| 757 | 1.30E-10 | 196213569 ref | EDV08234.1     | alkyl hydroperoxide reductase/ Thiol specific antioxidant/ Mal allergen | Cyanosche sp. PCC 7425                      | YFYPKDNTPGCTTQGGQyvsrdTHEINFKAKQSYgyvirs      |
| 758 | 6.30E-14 | 153894515 ref | YP_02015099.1  | AhpC/Tsa family protein                                                 | Pseudomonas syringae pv. phaseolicola 1448A | APAIALSYfypradlpgctteacGISDdIeplfaeyd         |
| 759 | 0        | 127512774 ref | YP_001093971.1 | Redoxin domain protein                                                  | Halonubrum lacusprofundi ATCC 49239         | YFYPRASITPGCTVQACnwiigITLLADqIkfmgrren        |
| 760 | 6.52E-10 | 186475686 ref | YP_001857156.1 | Redoxin domain protein                                                  | Shewanella loihica PV-4                     | LRGKKVYyypkdnptgctlegIVSRDhkkmygkvev          |
| 761 | 9.95E-12 | 163852401 ref | YP_001640444.1 | alkyl hydroperoxide reductase/ Thiol specific antioxidant/ Mal allergen | Burkholderia phymatum STM815                | LPGAGGEfyypkldisgctleaqGVSPDshakIraakvg       |
| 762 | 2.19E-14 | 148657657 ref | YP_001277862.1 | alkyl hydroperoxide reductase/ Thiol specific antioxidant/ Mal allergen | Methylobacterium extorquens PA1             | YFYPKDDTSGCTTQACgyspdSHQKFKTKHnyvgiers        |
| 763 | 1.00E-14 | 108763500 ref | YP_634658.1    | alkyl hydroperoxide reductase/ Thiol specific antioxidant/ Mal allergen | Roseiflexus sp. RS-1                        | YFYPKDDSPGCTTAQACgjspsdSHEGFAAKHRRsqjrd       |
| 764 | 0        | 86130304 ref  | YP_01048904.1  | anti-oxidant AhpC/Tsa family protein                                    | Myxococcus xanthus DK 1622                  | SLSDFKGKGLfyypkeasipgctaeacGVSAVDyghirm       |
| 765 | 0        | 197774450 ref | YP_002197356.1 | bacterioferritin migratory protein, thiol peroxidase, putative          | Cellulophaga sp. MED134                     | YFYPAALTPGCTKQACgyspdKLAkFREKEDygvirs         |
| 766 | 8.54E-13 | 159795627 pdb | ZYWN           | bacterioferritin migratory protein                                      | Dokdonia donghaensis MED134                 | AFYPAAFVQVCTKEMCGisvdsNKAKFEHNIkgvyla         |
| 767 | 0        | 126647839 ref | EA282603.1     | bacterioferritin migratory protein                                      | Streptomyces pristinaespiralis ATCC 25486   | LLFSLDSIskfkdkqIYFYPKDFTPGCTKEACgjskd         |
| 768 | 0        | 156078746 ref | NP_216124.1    | hypothetical alkyl hydroperoxide reductase                              | Algoriphagus sp. PR1                        | FFYPAAMTTPGCTKEACgjsktdKQAKFAKVRIRtrirs       |
| 769 | 3.98E-13 | 119476725 ref | YP_01617035.1  | bacterioferritin migratory protein                                      | Mycobacterium tuberculosis H37Rv            | SLKDFKGGQgyfyrastpgctIqIhVvVKIKKplisd         |
| 770 | 1.15E-13 | 71063529 ref  | YP_264056.1    | Probable peroxidoxin bcpB                                               | Mycobacterium bovis AF2122/97               | YFYPKDNTPGCTTQATlgvrsdSHESF1IKYNIgIvrs        |
| 771 | 0        | 87118945 ref  | YP_01074843.1  | Probable peroxidoxin bcpB                                               | Mycobacterium bovis BCG str. Pasteur 1173P2 | YFYPKDSTPGCTAQACgjsktdRIHQNF1KKNKeeegksd      |
| 772 | 1.96E-11 | 217977782 ref | YP_002361929.1 | Probable peroxidoxin bcpB                                               | Mycobacterium bovis BCG str. Pasteur 1173P2 | YFYPKDDTSGCTKEAlgvspsdSHVVKFKTKHQIldiq        |
| 773 | 0        | 149365075 ref | YP_01887110.1  | Probable peroxidoxin bcpB                                               | Mycobacterium tuberculosis H37Rv            | YFYPKAMTTPGCTVQACgjsktdKLSRFAEKELyngIhri      |
| 774 | 0        | 115943720 emb | CAL21666.1     | alkyl hydroperoxide reductase/ Thiol specific antioxidant/ Mal allergen | Methylocella silvestris BL2                 |                                               |
| 775 | 0        | 149291488 gb  | EDM41562.1     | thioredoxin-dependent thiol peroxidase                                  | Yersinia pestis CO92                        |                                               |
| 776 | 0        | 149291488 gb  | EDM41562.1     | bacterioferritin migratory protein                                      | Yersinia pestis CO92                        |                                               |

|     |          |            |                    |                                                                               |                                                  |                                          |
|-----|----------|------------|--------------------|-------------------------------------------------------------------------------|--------------------------------------------------|------------------------------------------|
| 774 | 1.16E-11 | 21225627   | ref NP_631406.1    | hypothetical protein SC07353                                                  | Streptomyces coelicolor A3(2)                    | FFYPAAALTTGGTAAEACgvsqdRQGEAFGRRTalaaira |
| 775 | 4.05E-13 | 8052366    | emb CAB92136.1     | conserved hypothetical protein SGNH11_07                                      | Streptomyces coelicolor A3(2)                    | FFYPKDNTPGCTTEAMlgisrdsIHENFKAKLEvgiers  |
| 776 | 5.71E-12 | 17548036   | ref NP_519438.1    | bacterioferritin comigratory xtdoreductase protein                            | Ralstonia solanacearum GMI1000                   | FFYPRDNTSGCTTEALgvsdkSHKFKDKHSmgvirs     |
| 777 | 0        | 17428331   | emb CAD15019.1     | probable bacterioferritin comigratory xtdoreductase protein                   | Ralstonia solanacearum                           | FFYKPMITPGCTVQACgjsidKLSRFAEKELyghjri    |
|     |          | 218781431  | gb ACL03887.1      | alkyl hydroperoxide reductase/ Thiol specific antioxidant/ Mal allergen       | Desulfatibacillum alkenivorans AK-01             |                                          |
|     |          | 108811484  | ref YP_647251.1    | thioredoxin-dependent thiol peroxidase                                        | Yersinia pestis Antiqua                          |                                          |
|     |          | 145899443  | ref YP_001163519.1 | thioredoxin-dependent thiol peroxidase                                        | Yersinia pestis Nepal516                         |                                          |
|     |          | 153948624  | ref YP_001400225.1 | thioredoxin-dependent thiol peroxidase                                        | Yersinia pestis Pestoides F                      |                                          |
|     |          | 162418156  | ref YP_001607492.1 | thioredoxin-dependent thiol peroxidase                                        | Yersinia pestis Angola                           |                                          |
|     |          | 166011176  | ref ZP_02232074.1  | peroxiredoxin, bacterioferritin comigratory protein                           | Yersinia pestis biovar Antiqua str. E1979001     |                                          |
|     |          | 166212368  | ref ZP_02238403.1  | peroxiredoxin, bacterioferritin comigratory protein                           | Yersinia pestis biovar Antiqua str. B42003004    |                                          |
|     |          | 167398016  | ref ZP_02304540.1  | peroxiredoxin, bacterioferritin comigratory protein                           | Yersinia pestis biovar Antiqua str. UG05-0454    |                                          |
|     |          | 167424696  | ref ZP_02316449.1  | peroxiredoxin, bacterioferritin comigratory protein                           | Yersinia pestis biovar Mediaevalis str. K1973002 |                                          |
|     |          | 108771532  | gb ABG17651.1      | bacterioferritin comigratory protein                                          | Yersinia pestis Nepal516                         |                                          |
|     |          | 108780162  | gb ABG14220.1      | bacterioferritin comigratory protein                                          | Yersinia pestis Antiqua                          |                                          |
|     |          | 145211139  | gb ABP40546.1      | bacterioferritin comigratory protein                                          | Yersinia pestis Pestoides F                      |                                          |
|     |          | 152960119  | gb ABS47580.1      | peroxiredoxin, bacterioferritin comigratory protein                           | Yersinia pseudotuberculosis IP 31758             |                                          |
|     |          | 162350971  | gb ABX84919.1      | peroxiredoxin, bacterioferritin comigratory protein                           | Yersinia pestis Angola                           |                                          |
|     |          | 165889854  | gb EDI442155.1     | peroxiredoxin, bacterioferritin comigratory protein                           | Yersinia pestis biovar Antiqua str. E1979001     |                                          |
|     |          | 166206299  | gb EDI50779.1      | peroxiredoxin, bacterioferritin comigratory protein                           | Yersinia pestis biovar Antiqua str. B42003004    |                                          |
|     |          | 167051520  | gb EDI62928.1      | peroxiredoxin, bacterioferritin comigratory protein                           | Yersinia pestis biovar Antiqua str. UG05-0454    |                                          |
|     |          | 167056578  | gb EDI66347.1      | peroxiredoxin, bacterioferritin comigratory protein                           | Yersinia pestis biovar Mediaevalis str. K1973002 |                                          |
| 778 | 7.15E-16 | 91978920   | ref YP_569579.1    | alkyl hydroperoxide reductase/ Thiol specific antioxidant/ Mal allergen       | Rhodospseudomonas palustris B18b5                | KQSRDKSPKSFyp rampgckeatGVSADefgiers     |
|     |          | 91683376   | gb ABE39678.1      | alkyl hydroperoxide reductase/ Thiol specific antioxidant/ Mal allergen       | Rhodospseudomonas palustris B18b5                |                                          |
| 779 | 9.67E-11 | 1047839048 | ref YP_6095446.1   | hypothetical protein PSEEN4067                                                | Pseudomonas entomophila L48                      | LAGLKGQyfpkdstipctteggGVSRSRshenthakoa   |
|     |          | 95112035   | emb CAK116762.1    | conserved hypothetical protein, putative bacterioferritin comigratory protein | Pseudomonas entomophila L48                      |                                          |
| 780 | 5.41E-14 | 149185107  | ref ZP_01863424.1  | putative bacterioferritin comigratory protein                                 | Erythrobacter sp. SD-21                          | FFYPKDNTPGCTTEAKgvsdkKHQNFIAKHDMymgiers  |
|     |          | 148831218  | gb EDI_49652.1     | putative bacterioferritin comigratory protein                                 | Erythrobacter sp. SD-21                          |                                          |
| 781 | 2.50E-18 | 15380777   | ref ZP_01960445.1  | hypothetical protein BACCAC_02080                                             | Bacteroides caecae ATCC 43185                    | VLGINEKfyypkdstipctteggGVSVDnqtkfieknn   |
|     |          | 149129386  | gb EDI020600.1     | hypothetical protein BACCAC_02080                                             | Bacteroides caecae ATCC 43185                    |                                          |
| 782 | 5.52E-13 | 67159217   | ref ZP_00419893.1  | alkyl hydroperoxide reductase/ Thiol specific antioxidant/ Mal allergen       | Azobacter vinelandii AVOP                        | FFYPKDSITPGCTTEGQgvsrdSHENFKSKOAYgldrs   |
|     |          | 67084246   | gb EAM03734.1      | alkyl hydroperoxide reductase/ Thiol specific antioxidant/ Mal allergen       | Azobacter vinelandii AVOP                        |                                          |
| 783 | 4.39E-14 | 20092861   | ref NP_618936.1    | bacterioferritin comigratory protein Bcp                                      | Methanosarcina acetivorans C2A                   | FFYPRDNTPGCSLEAKgvsrdSHRKFIEKKEpajlik    |
|     |          | 19818166   | gb AAM07416.1      | bacterioferritin comigratory protein Bcp                                      | Methanosarcina acetivorans C2A                   |                                          |
| 784 | 3.45E-10 | 91772196   | ref YP_564948.1    | alkyl hydroperoxide reductase/ Thiol specific antioxidant/ Mal allergen       | Methanococcus burtoni DSM 6242                   | LKGKVVyfpvrdntsgcsteamGVSKDshkfkfiekke   |
|     |          | 91711171   | gb ABE51098.1      | alkyl hydroperoxide reductase/ Thiol specific antioxidant/ Mal allergen       | Methanococcus burtoni DSM 6242                   |                                          |
| 785 | 0        | 186681017  | ref YP_001864213.1 | alkyl hydroperoxide reductase/ Thiol specific antioxidant/ Mal allergen       | Nostoc punctiforme PCC 73102                     | FFYPKDDITPGCTKQACgvsadSHQAFATQKYNpngkith |
|     |          | 186463469  | gb ACCT9270.1      | alkyl hydroperoxide reductase/ Thiol specific antioxidant/ Mal allergen       | Nostoc punctiforme PCC 73102                     |                                          |
| 786 | 0        | 118581405  | ref YP_902855.1    | redoxin domain-containing protein                                             | Pelobacter propionicus DSM 2379                  | FFYPKDNTPGCTKEACgvsdkSHNKFSIFAfGvgjliis  |
|     |          | 118504115  | gb ABL00598.1      | redoxin domain-containing protein                                             | Pelobacter propionicus DSM 2379                  |                                          |
| 787 | 6.06E-13 | 20172327   | ref YP_002253671.1 | bacterioferritin comigratory protein                                          | Ralstonia solanacearum Meik2                     | FFYPKDNTPGCTTEAMlgisrdsIHENFKAKLEvgiers  |
|     |          | 206688470  | emb CA_Q35433.1    | bacterioferritin comigratory protein                                          | Ralstonia solanacearum                           |                                          |
| 788 | 1.18E-11 | 153005637  | ref YP_001379962.1 | alkyl hydroperoxide reductase/ Thiol specific antioxidant/ Mal allergen       | Anaeromyxobacter sp. Fw109-5                     | LLGSAALnlskklkqpfAYPKAFITPGCTKQNAglsid   |
|     |          | 152029210  | gb ABS26978.1      | alkyl hydroperoxide reductase/ Thiol specific antioxidant/ Mal allergen       | Anaeromyxobacter sp. Fw109-5                     |                                          |
| 789 | 6.77E-15 | 186688487  | ref YP_001869683.1 | alkyl hydroperoxide reductase/ Thiol specific antioxidant/ Mal allergen       | Nostoc punctiforme PCC 73102                     | FFYPKDDITPGCTTEAKlgaklqgSHCKFISKHNlsipd  |
|     |          | 186468939  | gb ACC84740.1      | alkyl hydroperoxide reductase/ Thiol specific antioxidant/ Mal allergen       | Nostoc punctiforme PCC 73102                     |                                          |
| 790 | 1.13E-13 | 120609922  | ref YP_969600.1    | alkyl hydroperoxide reductase/ Thiol specific antioxidant/ Mal allergen       | Acidovorax avenae subsp. citrulli AA C00-1       | FFYPKDNTPGCTTEAMlgvsrdSHDDFKELVkgjlers   |
|     |          | 120588386  | gb ABM31826.1      | alkyl hydroperoxide reductase/ Thiol specific antioxidant/ Mal allergen       | Acidovorax avenae subsp. citrulli AA C00-1       |                                          |
| 791 | 0        | 55981289   | ref YP_144566.1    | bacterioferritin comigratory protein, thiol peroxidase, putative              | Thermus thermophilus HB8                         | FFYPKDDITPGCTKEACgvsadSHKRFARFYGvegvlrq  |
|     |          | 55772682   | dbi BAD71123.1     | bacterioferritin comigratory protein, thiol peroxidase, putative              | Thermus thermophilus HB8                         |                                          |
| 792 | 0        | 145300280  | ref YP_001143121.1 | bacterioferritin comigratory protein                                          | Aeromonas salmonicida subsp. salmonicida A449    | FFYPKAMITPGCTTQACgjspdHLKKFEERDSydgjhlrl |
|     |          | 142859362  | gb ABO91373.1      | bacterioferritin comigratory protein                                          | Aeromonas salmonicida subsp. salmonicida A449    |                                          |
| 793 | 2.52E-11 | 134295219  | ref YP_001118954.1 | alkyl hydroperoxide reductase/ Thiol specific antioxidant/ Mal allergen       | Burkholderia vietnamiensis G4                    | FFYPAAFTKGCTIEATgvsadLPALDRAslspdkthven  |
|     |          | 134138376  | gb AB054119.1      | alkyl hydroperoxide reductase/ Thiol specific antioxidant/ Mal allergen       | Burkholderia vietnamiensis G4                    |                                          |
| 794 | 4.00E-17 | 50843124   | ref YP_056351.1    | putative peroxiredoxin (AhpC/TSA family protein)                              | Protonibacterium aenes KPA171202                 | FFYPAAMITPGCTTQAIgispkLQKFKFAKESivgwirs  |
|     |          | 50840726   | gb AA183393.1      | putative peroxiredoxin (AhpC/TSA family protein)                              | Protonibacterium aenes KPA171202                 |                                          |
| 795 | 2.42E-15 | 72382144   | ref YP_291499.1    | alkyl hydroperoxide reductase/thiol specific antioxidant/ Mal allergen        | Prochlorococcus marinus str. NATL2A              | LFASINSSldfkskwwYFPKDFSSGCTLEAKglsad     |
|     |          | 72001994   | gb AA257796.1      | alkyl hydroperoxide reductase/thiol specific antioxidant/ Mal allergen        | Prochlorococcus marinus str. NATL2A              |                                          |
| 796 | 0        | 126174797  | ref YP_001050916.1 | alkyl hydroperoxide reductase/thiol specific antioxidant/ Mal allergen        | Shewanella baltica OS155                         | FFYPKAAITPGCTVQACgjspskLAKFAEKQAYdgjhlrl |
|     |          | 12599792   | gb ABN62047.1      | alkyl hydroperoxide reductase/thiol specific antioxidant/ Mal allergen        | Shewanella baltica OS155                         |                                          |
| 797 | 1.67E-13 | 83943208   | ref ZP_00955660.1  | AhpC/TSA family protein                                                       | Sulfitobacter sp. EE-36                          | FFYPRDDITPGCTKEAVgvsrdKHDRFAAKHAsmgiera  |
|     |          | 83842008   | gb EAP84085.1      | AhpC/TSA family protein                                                       | Sulfitobacter sp. EE-36                          |                                          |
| 798 | 3.73E-13 | 119501340  | ref XP_001267427.1 | disrupter of telomere silencing protein Dot5, putative                        | Neosartorya fischeri NRRL 181                    | EKSKRfltyprlasipgctkqacGLSADarissfkakqjs |
|     |          | 119415592  | gb EAW25530.1      | disrupter of telomere silencing protein Dot5, putative                        | Neosartorya fischeri NRRL 181                    |                                          |
| 799 | 1.88E-10 | 2218093    | gb AAB71130.1      | bacterioferritin comigratory protein homolog                                  | Riftia pachytilia endosymbiont                   | FFYPKDDITPGCTIEAVgvsrdSHAAFRDKHGRmgvirs  |
| 800 | 0        | 156932966  | ref YP_001436882.1 | thioredoxin-dependent thiol peroxidase                                        | Enterobacter sakazakii ATCC BAA-894              | FFYKPMITPGCTVQACgjsidKLSRFAEKELyghjri    |
|     |          | 156631220  | gb ABLU76046.1     | thioredoxin-dependent thiol peroxidase                                        | Enterobacter sakazakii ATCC BAA-894              |                                          |
| 802 | 2.01E-12 | 119492805  | ref ZP_01623891.1  | alkyl hydroperoxide reductase/ Thiol specific antioxidant/ Mal allergen       | Lynghya sp. PCC 8106                             | FFYPKDFITSGCTLEARglsadSHAEFCDSSEGpaitsee |
|     |          | 119452958  | gb EAW34130.1      | alkyl hydroperoxide reductase/ Thiol specific antioxidant/ Mal allergen       | Lynghya sp. PCC 8106                             |                                          |

|     |          |           |     |                |                                                                         |                                                  |                                           |
|-----|----------|-----------|-----|----------------|-------------------------------------------------------------------------|--------------------------------------------------|-------------------------------------------|
| 803 | 0        | 163755315 | ref | ZP_02162435.1  | bacterioferritin comigratory protein                                    | Kordia algicola OT-1                             | SLSDYAGKGLfypkasipgctaecGVSDAdgihrk       |
|     |          | 161324735 | gb  | EDP96064.1     | bacterioferritin comigratory protein                                    | Kordia algicola OT-1                             |                                           |
| 804 | 0        | 38234413  | ref | NP_940180.1    | bacterioferritin comigratory protein                                    | Corynebacterium diphtheriae NC.TC.13129          | YFYPFRANTPGCTKEAGcgsprKLAARDDYDvqgviys    |
|     |          | 38200676  | emb | CAE50372.1     | bacterioferritin comigratory protein                                    | Corynebacterium diphtheriae                      |                                           |
| 805 | 5.79E-15 | 78212672  | ref | YP_381451.1    | putative bacterioferritin comigratory protein                           | Synechococcus sp. CC9605                         | FFYPKDDTTPGCTAEACgigsdSHRRFAATRHNgvyrh    |
|     |          | 78197131  | gb  | ABBS34836.1    | putative bacterioferritin comigratory protein                           | Synechococcus sp. CC9605                         |                                           |
| 806 | 2.44E-14 | 118498311 | ref | YP_899361.1    | bacterioferritin comigratory protein                                    | Francisella tularensis subsp. novicida U112      | LLSDFGKKKnyfypkamtpgctqtsIGISPdYdgihr     |
|     |          | 194323895 | ref | ZP_03067670.1  | antioxidant. AhpC/TSA family protein                                    | Francisella tularensis subsp. novicida U112      |                                           |
|     |          | 11842427  | gb  | ABK90607.1     | bacterioferritin comigratory protein                                    | Francisella tularensis subsp. novicida U112      |                                           |
|     |          | 194323895 | ref | EDJ119275.1    | antioxidant. AhpC/TSA family protein                                    | Francisella tularensis subsp. novicida U112      |                                           |
| 807 | 0        | 117617543 | ref | YP_855437.1    | putative peroxiredoxin bcp                                              | Aeromonas hydrophila subsp. hydrophila ATCC 7966 | YFYPKAMTPTGCTTQACgispdrLKKFEEERDnydqihrl  |
|     |          | 117558950 | gb  | ABK33898.1     | putative peroxiredoxin bcp                                              | Aeromonas hydrophila subsp. hydrophila ATCC 7966 |                                           |
| 808 | 0        | 78213815  | ref | YP_382594.1    | putative bacterioferritin comigratory (BCP) protein                     | Synechococcus sp. CC9605                         | SLASLRGfypkdtidgkckcaecGISKDShtnkfkhe     |
|     |          | 78198224  | gb  | ABBS36039.1    | putative bacterioferritin comigratory (BCP) protein                     | Synechococcus sp. CC9605                         |                                           |
| 809 | 0        | 88855893  | ref | ZP_01150256.1  | BCp                                                                     | marine actinobacterium PHSC20C1                  | YFYPAAITPGCTTQACgystdrKLTkFREQRvwyviys    |
|     |          | 88814917  | gb  | EAR24776.1     | Bcp                                                                     | marine actinobacterium PHSC20C1                  |                                           |
| 810 | 4.24E-13 | 191164510 | ref | ZP_03026374.1  | alkyl hydroperoxide reductase/ Thiol specific antioxidant/ Mal allergen | Geobacter sp. M21                                | FFYPDRDNTPGCTAEAVkqiqlfcdqTIGSIRSRvpsd    |
|     |          | 190994401 | gb  | EDV69865.1     | alkyl hydroperoxide reductase/ Thiol specific antioxidant/ Mal allergen | Geobacter sp. M21                                |                                           |
| 811 | 4.16E-16 | 162660664 | ref | ZP_01731765.1  | antioxidant. AhpC/Tsa family protein                                    | Cyanoshece sp. CCY0110                           | YFYPKDDTTPGCTKEAGvysmdSHKFAEKKEYGaegltusy |
|     |          | 126618037 | gb  | EAZ88825.1     | antioxidant. AhpC/Tsa family protein                                    | Cyanoshece sp. CCY0110                           |                                           |
| 812 | 1.20E-12 | 159040770 | ref | YP_001540022.1 | alkyl hydroperoxide reductase/ Thiol specific antioxidant/ Mal allergen | Caldyvirga maquiltingensis IC-167                | FLGKGRPflpaaflspsvctkcaicAI/SDalkafkcaek  |
|     |          | 157919605 | gb  | ABW01032.1     | alkyl hydroperoxide reductase/ Thiol specific antioxidant/ Mal allergen | Caldyvirga maquiltingensis IC-167                |                                           |
| 813 | 2.54E-09 | 118049611 | ref | ZP_01518162.1  | alkyl hydroperoxide reductase/ Thiol specific antioxidant/ Mal allergen | Comamonas testosteroni KF-1                      | LLAALLAYfipkafatggctleahTLKRFSITEACivssd  |
|     |          | 118003478 | gb  | EAUV17631.1    | alkyl hydroperoxide reductase/ Thiol specific antioxidant/ Mal allergen | Comamonas testosteroni KF-1                      |                                           |
| 814 | 0        | 120899129 | ref | YP_963703.1    | thioredoxin-dependent thiol peroxidase                                  | Shewanella sp. W3-18-1                           | YFYPKASITPGCTVQACgispdrKLAkFAEKQSYdgihr   |
|     |          | 146292800 | ref | YP_001183224.1 | thioredoxin-dependent thiol peroxidase                                  | Shewanella putrefaciens CN-32                    |                                           |
|     |          | 120859222 | gb  | ABM25149.1     | Redoxin domain protein                                                  | Shewanella sp. W3-18-1                           |                                           |
|     |          | 145664490 | gb  | ABP75425.1     | Redoxin domain protein                                                  | Shewanella putrefaciens CN-32                    |                                           |
| 816 | 0        | 209890907 | ref | ZP_03283554.1  | hypothetical protein ENTCAN_03360                                       | Enterobacter cancerogenus ATCC 35316             | YFYPKAMTPTGCTVQACgistsdKLSRFAEKELydgihri  |
|     |          | 20989772  | gb  | EEA13421.1     | hypothetical protein ENTCAN_03360                                       | Enterobacter cancerogenus ATCC 35316             |                                           |
| 817 | 1.86E-09 | 150396688 | ref | YP_001327155.1 | alkyl hydroperoxide reductase/ Thiol specific antioxidant/ Mal allergen | Sinorhizobium medicae WSM419                     | FFYPKDDTKGCTQOEAlgispdSHDRFTKRHGhldirq    |
|     |          | 150028203 | gb  | ABR60320.1     | alkyl hydroperoxide reductase/ Thiol specific antioxidant/ Mal allergen | Sinorhizobium medicae WSM419                     |                                           |
| 818 | 3.66E-12 | 162454455 | ref | YP_001618822.1 | antioxidant protein                                                     | Sorangium cellulosum 'So ce 56'                  | YFFPKAFTPSCVTEAQAqvstQQRFAEAQKilglarr     |
|     |          | 161165037 | emb | CAN96342.1     | antioxidant protein                                                     | Sorangium cellulosum 'So ce 56'                  |                                           |
| 819 | 1.69E-18 | 160887384 | ref | ZP_02068387.1  | hypothetical protein BACOVA_05403                                       | Bacteroides ovatus ATCC 8483                     | APEILGfypjksispsctagaacGVSDsthpklfcknn    |
|     |          | 156107795 | gb  | EDD09640.1     | hypothetical protein BACOVA_05403                                       | Bacteroides ovatus ATCC 8483                     |                                           |
| 820 | 0        | 169179437 | ref | ZP_02840447.1  | redoxin domain protein                                                  | Arthrobacter chlorophenolicus A6                 | LVTGDSpsgsmYFYPAAA TP GC TKEACkhtkfaaag   |
|     |          | 169013027 | gb  | EDS59695.1     | redoxin domain protein                                                  | Arthrobacter chlorophenolicus A6                 |                                           |
| 821 | 8.30E-11 | 214026694 | ref | EEB69529.1     | redoxin                                                                 | Ruegeria sp. R11                                 | FFYPRDDTTPGCTKESihlgafadagaGISKDhwglers   |
|     |          | 53718899  | gb  | YFYP_107885.1  | AhpC/TSA family protein                                                 | Burkholderia pseudomallei K96243                 | YFYPAAFTTGCTIEATHvysadKLPAlSikANRwaashrq  |
| 822 | 3.83E-11 | 76611807  | ref | YP_332901.1    | AhpC/TSA family protein                                                 | Burkholderia pseudomallei 1710b                  |                                           |
|     |          | 126442138 | ref | YP_001058401.1 | antioxidant. AhpC/TSA family protein                                    | Burkholderia pseudomallei 668                    |                                           |
|     |          | 126453167 | ref | YP_001065637.1 | antioxidant. AhpC/TSA family protein                                    | Burkholderia pseudomallei 1106a                  |                                           |
|     |          | 13428386  | ref | YP_01770558.1  | antioxidant. AhpC/TSA family protein                                    | Burkholderia pseudomallei 305                    |                                           |
|     |          | 161358012 | ref | YP_02101890.1  | antioxidant. AhpC/TSA family protein                                    | Burkholderia pseudomallei 1106b                  |                                           |
|     |          | 161372512 | ref | ZP_02112073.1  | antioxidant. AhpC/TSA family protein                                    | Burkholderia pseudomallei 1710a                  |                                           |
|     |          | 167718916 | ref | ZP_02402152.1  | antioxidant. AhpC/TSA family protein                                    | Burkholderia pseudomallei DM98                   |                                           |
|     |          | 167737920 | ref | ZP_02410694.1  | antioxidant. AhpC/TSA family protein                                    | Burkholderia pseudomallei 14                     |                                           |
|     |          | 167815101 | ref | ZP_02446781.1  | antioxidant. AhpC/TSA family protein                                    | Burkholderia pseudomallei 91                     |                                           |
|     |          | 167823518 | ref | ZP_02454989.1  | antioxidant. AhpC/TSA family protein                                    | Burkholderia pseudomallei 9                      |                                           |
|     |          | 167845067 | ref | ZP_02470575.1  | antioxidant. AhpC/TSA family protein                                    | Burkholderia pseudomallei B7210                  |                                           |
|     |          | 167893611 | ref | ZP_02481013.1  | antioxidant. AhpC/TSA family protein                                    | Burkholderia pseudomallei 7894                   |                                           |
|     |          | 167902056 | ref | ZP_02489261.1  | antioxidant. AhpC/TSA family protein                                    | Burkholderia pseudomallei 1106b                  |                                           |
|     |          | 167910294 | ref | ZP_02497385.1  | antioxidant. AhpC/TSA family protein                                    | Burkholderia pseudomallei 112                    |                                           |
|     |          | 167916325 | ref | ZP_02505416.1  | antioxidant. AhpC/TSA family protein                                    | Burkholderia pseudomallei BCC215                 |                                           |
|     |          | 194506822 | ref | YP_002036396.1 | antioxidant. AhpC/TSA family protein                                    | Burkholderia pseudomallei 1655                   |                                           |
|     |          | 194509791 | ref | YP_002022321.1 | antioxidant. AhpC/TSA family protein                                    | Burkholderia pseudomallei Pasteur 52237          |                                           |
|     |          | 194514438 | ref | YP_002049949.1 | antioxidant. AhpC/TSA family protein                                    | Burkholderia pseudomallei S13                    |                                           |
|     |          | 194571684 | ref | YP_002106684.1 | antioxidant. AhpC/TSA family protein                                    | Burkholderia pseudomallei 406e                   |                                           |
|     |          | 217423735 | ref | YP_02455236.1  | antioxidant. AhpC/TSA family protein                                    | Burkholderia pseudomallei 576                    |                                           |
|     |          | 52209313  | emb | CAH35258.1     | AhpC/TSA family membrane protein                                        | Burkholderia pseudomallei K96243                 |                                           |
|     |          | 76581260  | gb  | ABA50735.1     | AhpC/TSA family membrane protein                                        | Burkholderia pseudomallei 1710b                  |                                           |
|     |          | 126221631 | gb  | ABN85137.1     | antioxidant. AhpC/TSA family protein                                    | Burkholderia pseudomallei 668                    |                                           |
|     |          | 126226809 | gb  | ABN90349.1     | antioxidant. AhpC/TSA family protein                                    | Burkholderia pseudomallei 1106a                  |                                           |
|     |          | 157806846 | gb  | EDD084016.1    | antioxidant. AhpC/TSA family protein                                    | Burkholderia pseudomallei 406e                   |                                           |
|     |          | 134244849 | gb  | EBA44946.1     | antioxidant. AhpC/TSA family protein                                    | Burkholderia pseudomallei 305                    |                                           |
|     |          | 157935944 | gb  | EDD091614.1    | antioxidant. AhpC/TSA family protein                                    | Burkholderia pseudomallei Pasteur 52237          |                                           |
|     |          | 169654046 | gb  | EDS38739.1     | antioxidant. AhpC/TSA family protein                                    | Burkholderia pseudomallei S13                    |                                           |
|     |          | 184210847 | gb  | EDJ07890.1     | antioxidant. AhpC/TSA family protein                                    | Burkholderia pseudomallei 1655                   |                                           |
|     |          | 217393593 | gb  | EEC33614.1     | antioxidant. AhpC/TSA family protein                                    | Burkholderia pseudomallei 576                    |                                           |
| 823 | 3.27E-16 | 16329296  | ref | NP_440024.1    | bacterioferritin comigratory protein                                    | Synechocystis sp. PCC 6803                       | YFYPKDNTPGCTTEAlyvpsdSHGKFDKHncseglirs    |

|     |                |                |                |                                                                         |                                                                        |                                           |
|-----|----------------|----------------|----------------|-------------------------------------------------------------------------|------------------------------------------------------------------------|-------------------------------------------|
| 824 | 0              | 1651777 dbj    | BAA116704.1    | bacterioferritin comigratory protein                                    | Synechocystis sp. PCC 6803                                             | YFYPKASTPGCTTEAGVsvrdAIDTFADKQGVmgjleira  |
|     |                | 1621419136 ref | YP_001603657.1 | putative hydroxylase bcp                                                | Glucanacetobacter diazotrophicus PAI 5                                 |                                           |
|     |                | 2095443033 ref | YP_002272782.1 | alkyl hydroperoxide reductase/ Thiol specific antioxidant/ Mal allergen | Glucanacetobacter diazotrophicus PAI 5                                 |                                           |
|     |                | 161787773 emb  | CAP57369.1     | putative peroxiredoxin bcp                                              | Glucanacetobacter diazotrophicus PAI 5                                 |                                           |
| 825 | 2.49E-14       | 209532740 gb   | ACI52677.1     | alkyl hydroperoxide reductase/ Thiol specific antioxidant/ Mal allergen | Rickettsia felis URRWXCal2                                             | YFYPKDDTTPGCTTEAAGVsvkdSHDKFEKYSymgdira   |
| 826 | 2.57E-11       | 67458590 ref   | YP_246214.1    | bacterioferritin comigratory protein                                    | Burkholderia oklahomensis E0147                                        | SLSGLKGGKLYfypkdnipgctteglGVSVRDRvrgiers  |
| 826 | 16.7562493 ref | 67004123 gb    | AAV61049.1     | bacterioferritin comigratory protein                                    | Burkholderia oklahomensis C8786                                        |                                           |
| 827 | 6.73E-13       | 162931818 ref  | NP_440046.1    | antioxidant. AhpC/TSA family protein                                    | Synechocystis sp. PCC 6803                                             | YFYPKDDTTPGCTTEAAGVsvdSHFAFCDAECPegeline  |
| 828 | 3.16E-14       | 1153678916 gb  | EAUJ67862.1    | bacterioferritin comigratory protein                                    | Synechocystis sp. PCC 6803                                             | YFYPKDDTTPGCTTEAAGVsvdSHFAFCDAECPegeline  |
| 828 | 11.53668916 gb | 1153668916 gb  | EAUJ67862.1    | alkyl hydroperoxide reductase/ Thiol specific antioxidant/ Mal allergen | Stigmatella aurantiaca DW4/3-1                                         | YFYPKDDTTPGCTTEAAGVsvdSHFAFCDAECPegeline  |
| 829 | 3.79E-10       | 15643543 ref   | NP_228569.1    | hypothetical protein TM0780                                             | Thermotoga maritima MSB8                                               | AFYPGAFTSVCKEKLGVsvdANKFAEKNNHpgytaa      |
|     |                | 1482689293 ref | YP_001243763.1 | alkyl hydroperoxide reductase/ Thiol specific antioxidant/ Mal allergen | Thermotoga petrophila RKU-1                                            |                                           |
|     |                | 170287952 ref  | YP_001738190.1 | alkyl hydroperoxide reductase/ Thiol specific antioxidant/ Mal allergen | Thermotoga sp. RQ2                                                     |                                           |
|     |                | 4981309 gb     | AAD35692.1     | AE001747_5 bacterioferritin comigratory protein. ahpC/TSA family        | Thermotoga maritima MSB8                                               |                                           |
|     |                | 147734837 gb   | ABQ46177.1     | alkyl hydroperoxide reductase/ Thiol specific antioxidant/ Mal allergen | Thermotoga petrophila RKU-1                                            |                                           |
|     |                | 170175455 gb   | AC808507.1     | alkyl hydroperoxide reductase/ Thiol specific antioxidant/ Mal allergen | Thermotoga sp. RQ2                                                     |                                           |
|     |                | 214041010 gb   | EEB81657.1     | bacterioferritin comigratory protein. AhpC/TSA family                   | Marinitoga piezophila KA3                                              |                                           |
| 830 | 1.60E-13       | 33862660 ref   | NP_894220.1    | putative bacterioferritin comigratory protein                           | Prochlorococcus marinus str. MIT 9313                                  | LKGGKVLVfypkddttdgdaeaGVSDShrtqfaerhg     |
|     |                | 33634576 emb   | CAE20562.1     | putative bacterioferritin comigratory protein                           | Prochlorococcus marinus str. MIT 9313                                  |                                           |
| 831 | 1.67E-13       | 72382626 ref   | YP_291981.1    | putative bacterioferritin comigratory protein                           | Prochlorococcus marinus str. NATL2A                                    | FFYPKDDTTPGCTTEAENGVsvdSHRSFADKNKvigeirn  |
|     |                | 124026345 ref  | YP_001015461.1 | peroxiredoxin                                                           | Prochlorococcus marinus str. NATL1A                                    |                                           |
|     |                | 72002476 gb    | AA258278.1     | putative bacterioferritin comigratory protein                           | Prochlorococcus marinus str. NATL2A                                    |                                           |
|     |                | 123861413 gb   | ABM76196.1     | peroxiredoxin                                                           | Prochlorococcus marinus str. NATL1A                                    |                                           |
| 832 | 2.05E-11       | 116074817 ref  | YP_01472078.1  | alkyl hydroperoxide reductase/thiol specific antioxidant/Mal allergens  | Synechococcus sp. RS9916                                               | LEGTRRTVfypdrflfsgleahGVSDArlkqlgseas     |
| 833 | 2.77E-11       | 116068039 gb   | EAUJ73792.1    | alkyl hydroperoxide reductase/thiol specific antioxidant/Mal allergens  | Synechococcus sp. RS9916                                               | YFYPAAFTKGTCTEATQVsvdLPAALDRASlspdkthven  |
|     |                | 116689212 ref  | YP_834835.1    | redoxin                                                                 | Burkholderia cenocepacia H12424                                        |                                           |
|     |                | 105892456 gb   | ABF75621.1     | Redoxin                                                                 | Burkholderia cenocepacia AU_1054                                       |                                           |
|     |                | 116647301 gb   | ABK07942.1     | Redoxin domain protein                                                  | Burkholderia cenocepacia H12424                                        |                                           |
| 834 | 0              | 21325260 gb    | BAB98982.1     | Peroxiredoxin                                                           | Burkholderia cenocepacia ATCC_13032                                    | SLSDFAGKQVfypkamtgpcckeaGVSDVgvvirs       |
| 835 | 0              | 111220976 ref  | YP_711770.1    | putative thiol peroxidase. thioredoxin-dependent. Bacterioferritin comi | Frankia alni ACN14a                                                    | YFYPAASTPGCTKQAGVsvdPKLKFVFRDNEsvvirs     |
| 836 | 3.26E-10       | 482678040 ref  | YP_001832186.1 | alkyl hydroperoxide reductase/ Thiol specific antioxidant/ Mal allergen | Beijerinckia indica subsp. indica ATCC 9039                            | VVALAAVfypaafisgctveahGVSHDalkawakasp     |
|     |                | 168339923 gb   | AC894697.1     | alkyl hydroperoxide reductase/ Thiol specific antioxidant/ Mal allergen | Beijerinckia indica subsp. indica ATCC 9039                            |                                           |
| 837 | 9.14E-13       | 158330879 ref  | YP_001517263.1 | alkyl hydroperoxide reductase/ Thiol specific antioxidant, putative     | Acyrochloris marina MBIC11017                                          | VLGLVSVfypdrtfpgctveaQDLPKYIERNfgyvsd     |
|     |                | 158306320 gb   | ABWV27937.1    | alkyl hydroperoxide reductase/ Thiol specific antioxidant, putative     | Acyrochloris marina MBIC11017                                          |                                           |
| 838 | 1.18E-10       | 146277889 gb   | YP_001168048.1 | alkyl hydroperoxide reductase/ Thiol specific antioxidant/ Mal allergen | Rhodobacter sphaeroides ATCC 17025                                     | SLSALFKPGTAYfypkddttdgdaeaGVSDglskgjgilia |
|     |                | 145565130 gb   | ABP70743.1     | alkyl hydroperoxide reductase/ Thiol specific antioxidant/ Mal allergen | Rhodobacter sphaeroides ATCC_17025                                     |                                           |
| 839 | 4.64E-11       | 156734533 ref  | YP_001433582.1 | alkyl hydroperoxide reductase/ Thiol specific antioxidant/ Mal allergen | Roseiflexus castenholzii DSM 13941                                     | FFYPKADTPTCTTEACsvyaeriaGVSDPaqaafndkhh   |
|     |                | 156724748 gb   | ABU05986.1     | alkyl hydroperoxide reductase/ Thiol specific antioxidant/ Mal allergen | Roseiflexus castenholzii DSM 13941                                     |                                           |
| 840 | 1.08E-13       | 150020632 ref  | YP_001305986.1 | alkyl hydroperoxide reductase/ Thiol specific antioxidant/ Mal allergen | Thermosiphon melanesiensis B1429                                       | YFYPKDNITKGTCTTEAVGVsvdSHKFKFAKHNYvgivrt  |
|     |                | 123441477 ref  | YP_001005463.1 | thioredoxin-dependent thiol peroxidase                                  | Yersinia enterocolitica subsp. enterocolitica 8081                     | YFYPKAMTPGCTVQACgjsrdKLSRFAEKELydgihri    |
| 841 | 0              | 122088438 emb  | CAL11230.1     | bacterioferritin comigratory protein                                    | Yersinia enterocolitica subsp. enterocolitica 8081                     |                                           |
| 842 | 3.34E-13       | 154491114 ref  | YP_02031055.1  | hypothetical protein PARMER_01036                                       | Parabacteroides merdae ATCC 43184                                      | FKGKKLAvfypkdnrtsgctaeacGVSKDshrtgflqce   |
|     |                | 154088534 gb   | EDN87578.1     | hypothetical protein PARMER_01036                                       | Parabacteroides merdae ATCC 43184                                      |                                           |
| 843 | 0              | 213965665 ref  | YP_03394056.1  | antioxidant. AhpC/TSA family                                            | Corynebacterium amycolatum SK46                                        | SLSDYAGKPVfypyrantpbgcteaGVSDVgvvirs      |
|     |                | 40063397 gb    | AAK38208.1     | antioxidant. AhpC/TSA family                                            | Corynebacterium amycolatum SK46                                        |                                           |
| 844 | 0              | 84701499 ref   | YP_01016074.1  | bacterioferritin comigratory protein                                    | Parvularcula bermudensis HTCC2503                                      | LVLAVLffypkddttdgcteaGVSDshskfkekyv       |
| 845 | 1.15E-11       | 84890745 gb    | EAQ01686.1     | bacterioferritin comigratory protein                                    | Parvularcula bermudensis HTCC2503                                      | SLSDFKQWLYfypkddttdgcteaGVSKDvmjleira     |
| 846 | 9.09E-17       | 123698491 ref  | YP_001009349.1 | alkyl hydroperoxide reductase/ Thiol specific antioxidant/ Mal allergen | Prochlorococcus marinus str. AS9601                                    | LVISIFfypkdnrtsgctleakELKKDFSKYNGlsad     |
|     |                | 123198601 gb   | ABM7024.1      | thioredoxin-dependent thiol peroxidase                                  | Prochlorococcus marinus str. AS9601                                    |                                           |
| 847 | 0              | 56412627 ref   | YP_149702.1    | bacterioferritin comigratory protein                                    | Salmonella enterica subsp. enterica serovar Paratyphi A str. ATCC 9150 | YFYPKAMTPGCTVQACgjsrdKLSRFAEKELydgihri    |
|     |                | 197361562 ref  | YP_002141198.1 | bacterioferritin comigratory protein                                    | Salmonella enterica subsp. enterica serovar Paratyphi A str. AKU_12601 |                                           |
|     |                | 56126884 gb    | AAV76390.1     | bacterioferritin comigratory protein                                    | Salmonella enterica subsp. enterica serovar Paratyphi A str. AKU_12601 |                                           |
| 848 | 0              | 159802629 emb  | CAR84876.1     | bacterioferritin comigratory protein                                    | Prochlorococcus marinus str. MIT 9211                                  | YFYPKDNITPGCTKEACglskshLKFISKYosegkeli    |
|     |                | 159807805 gb   | ABX08019.1     | putative bacterioferritin comigratory (BCP) protein                     | Prochlorococcus marinus str. MIT 9211                                  |                                           |
| 849 | 2.93E-14       | 85709963 ref   | YP_01041028.1  | Bcp. bacterioferritin comigratory protein                               | Erythrobacter sp. NAP1                                                 | FFYPKDNITPGCTTEAKGVsvkdKHQNFKAHDArdkilaq  |
|     |                | 85688673 gb    | EAQ28677.1     | Bcp. bacterioferritin comigratory protein                               | Erythrobacter sp. NAP1                                                 |                                           |
| 850 | 9.16E-15       | 162452894 ref  | YP_001616261.1 | peroxiredoxin                                                           | Sorangium cellulosum 'So ce 56'                                        | FFYPKDDTTPGCTAESGVsvdSHQGFADKYRleastrg    |
|     |                | 161163476 emb  | CAN84781.1     | peroxiredoxin                                                           | Sorangium cellulosum 'So ce 56'                                        |                                           |
| 851 | 7.52E-13       | 89800695 ref   | YP_523166.1    | alkyl hydroperoxide reductase/ Thiol specific antioxidant/ Mal allergen | Rhodolferax ferrireducens T118                                         | YFYPKDNITPGCTTEAMGVsvdSHDFEAKLEvkjlers    |
|     |                | 89345432 gb    | ABD06935.1     | alkyl hydroperoxide reductase/ Thiol specific antioxidant/ Mal allergen | Rhodolferax ferrireducens T118                                         |                                           |
| 852 | 3.94E-11       | 53719103 ref   | YP_108089.1    | putative bacterioferritin comigratory protein (detoxification)          | Burkholderia pseudomallei K96243                                       | SLSGKGGKLYfypkdnrtsgctglGVSVRDRvrgiers    |
|     |                | 76811031 ref   | YP_333801.1    | anti-oxidant AhpC/TSA family protein                                    | Burkholderia pseudomallei 1710b                                        |                                           |
|     |                | 126438527 ref  | YP_001059277.1 | anti-oxidant AhpC/TSA family protein                                    | Burkholderia pseudomallei 668                                          |                                           |

|            |           |                 |                                                                |                                                                         |                                                                                                                                                                            |
|------------|-----------|-----------------|----------------------------------------------------------------|-------------------------------------------------------------------------|----------------------------------------------------------------------------------------------------------------------------------------------------------------------------|
| 12645240.1 | ref       | YP_01066544.1   | anti-oxidant AhpC/TSA family protein                           | Burkholderia pseudomallei 1106a                                         |                                                                                                                                                                            |
| 134277122  | ref       | ZP_01763837.1   | antioxidant. AhpC/TSA family                                   | Burkholderia pseudomallei 305                                           |                                                                                                                                                                            |
| 161355133  | ref       | ZP_02101013.1   | antioxidant. AhpC/TSA family protein                           | Burkholderia pseudomallei 1106b                                         |                                                                                                                                                                            |
| 161370265  | ref       | ZP_02109832.1   | antioxidant. AhpC/TSA family protein                           | Burkholderia pseudomallei 1710a                                         |                                                                                                                                                                            |
| 167719204  | ref       | ZP_02402440.1   | antioxidant. AhpC/TSA family protein                           | Burkholderia pseudomallei DW98                                          |                                                                                                                                                                            |
| 167738206  | ref       | ZP_02410980.1   | antioxidant. AhpC/TSA family protein                           | Burkholderia pseudomallei 14                                            |                                                                                                                                                                            |
| 167815395  | ref       | ZP_02447075.1   | antioxidant. AhpC/TSA family protein                           | Burkholderia pseudomallei 91                                            |                                                                                                                                                                            |
| 167823803  | ref       | ZP_02455274.1   | antioxidant. AhpC/TSA family protein                           | Burkholderia pseudomallei 9                                             |                                                                                                                                                                            |
| 167845346  | ref       | ZP_02470854.1   | antioxidant. AhpC/TSA family protein                           | Burkholderia pseudomallei B7210                                         |                                                                                                                                                                            |
| 167893887  | ref       | ZP_02481289.1   | antioxidant. AhpC/TSA family protein                           | Burkholderia pseudomallei 7894                                          |                                                                                                                                                                            |
| 167902342  | ref       | ZP_02489547.1   | antioxidant. AhpC/TSA family protein                           | Burkholderia pseudomallei NGCT 13177                                    |                                                                                                                                                                            |
| 167910571  | ref       | ZP_02497668.1   | antioxidant. AhpC/TSA family protein                           | Burkholderia pseudomallei 112                                           |                                                                                                                                                                            |
| 167918605  | ref       | ZP_02505696.1   | antioxidant. AhpC/TSA family protein                           | Burkholderia pseudomallei BCC215                                        |                                                                                                                                                                            |
| 194506200  | ref       | YP_0020335590.1 | antioxidant. AhpC/TSA family                                   | Burkholderia pseudomallei 1655                                          |                                                                                                                                                                            |
| 194510635  | ref       | YP_002023165.1  | antioxidant. AhpC/TSA family                                   | Burkholderia pseudomallei Pasteur 52237                                 |                                                                                                                                                                            |
| 194514635  | ref       | YP_002050737.1  | antioxidant. AhpC/TSA family                                   | Burkholderia pseudomallei S13                                           |                                                                                                                                                                            |
| 52209517   | emb       | CAH35489.1      | putative bacterioferritin comigratory protein (detoxification) | Burkholderia pseudomallei K96243                                        |                                                                                                                                                                            |
| 76580484   | db        | ABA49959.1      | antioxidant. AhpC/Tsa family                                   | Burkholderia pseudomallei 1710b                                         |                                                                                                                                                                            |
| 126218020  | db        | ABN81526.1      | antioxidant. AhpC/TSA family                                   | Burkholderia pseudomallei 668                                           |                                                                                                                                                                            |
| 126228043  | db        | ABN89583.1      | antioxidant. AhpC/TSA family                                   | Burkholderia pseudomallei 1106a                                         |                                                                                                                                                                            |
| 134250772  | db        | EBA50951.1      | antioxidant. AhpC/TSA family                                   | Burkholderia pseudomallei 305                                           |                                                                                                                                                                            |
| 157936788  | db        | ED092458.1      | antioxidant. AhpC/TSA family                                   | Burkholderia pseudomallei Pasteur 52237                                 |                                                                                                                                                                            |
| 169654243  | db        | ED586936.1      | antioxidant. AhpC/TSA family                                   | Burkholderia pseudomallei S13                                           |                                                                                                                                                                            |
| 164210041  | db        | EDUJ07084.1     | antioxidant. AhpC/TSA family                                   | Burkholderia pseudomallei 1655                                          |                                                                                                                                                                            |
| 0          | 212715773 | ref             | YP_0332380.1                                                   | hypothetical protein BIFCAT_00673                                       |                                                                                                                                                                            |
| 0          | 212861740 | db              | EEB27715.1                                                     | hypothetical protein BIFCAT_00673                                       |                                                                                                                                                                            |
| 3.74E-12   | 119356320 | ref             | YP_912964.1                                                    | redoxin domain-containing protein                                       |                                                                                                                                                                            |
| 0          | 119355669 | db              | ABL66540.1                                                     | Redoxin domain protein                                                  |                                                                                                                                                                            |
| 855        | 0         | 125599355       | db                                                             | EA236135.1                                                              | hypothetical protein OsJ_019618                                                                                                                                            |
| 856        | 6.99E-12  | 118575395       | ref                                                            | YP_875138.1                                                             | peroxiredoxin                                                                                                                                                              |
| 0          | 118193916 | db              | ABK76834.1                                                     | peroxiredoxin                                                           |                                                                                                                                                                            |
| 857        | 1.11E-10  | 114321627       | ref                                                            | YP_743310.1                                                             | redoxin domain-containing protein                                                                                                                                          |
| 0          | 114228021 | db              | ABI57820.1                                                     | Redoxin domain protein                                                  |                                                                                                                                                                            |
| 858        | 7.53E-15  | 843389729       | ref                                                            | YP_00991281.1                                                           | bacterioferritin comigratory protein                                                                                                                                       |
| 0          | 84376830  | db              | EA993704.1                                                     | bacterioferritin comigratory protein                                    |                                                                                                                                                                            |
| 859        | 0         | 209698806       | ref                                                            | YP_002263736.1                                                          | putative peroxiredoxin bcp (thioredoxin reductase (bacterioferritin comigratory peroxiredoxin bcp (thioredoxin reductase (bacterioferritin comigratory peroxiredoxin bcp)) |
| 0          | 208003789 | emb             | CA080065.1                                                     | peroxiredoxin BcpB                                                      |                                                                                                                                                                            |
| 860        | 0         | 169629747       | ref                                                            | YP_001703396.1                                                          | Probable peroxiredoxin BcpB                                                                                                                                                |
| 0          | 169241714 | emb             | CAM62742.1                                                     | alkyl hydroperoxide reductase/ Thiol specific antioxidant/ Mal allergen |                                                                                                                                                                            |
| 861        | 1.85E-13  | 159040817       | ref                                                            | YP_001540066.1                                                          | alkyl hydroperoxide reductase/ Thiol specific antioxidant/ Mal allergen                                                                                                    |
| 0          | 157919649 | db              | ABW10176.1                                                     | alkyl hydroperoxide reductase/ Thiol specific antioxidant/ Mal allergen |                                                                                                                                                                            |
| 862        | 0         | 77974619        | ref                                                            | ZP_00830158.1                                                           | COG1225: Peroxiredoxin                                                                                                                                                     |
| 863        | 3.49E-13  | 120603206       | ref                                                            | YP_967606.1                                                             | redoxin domain-containing protein                                                                                                                                          |
| 0          | 120563435 | db              | ABM29179.1                                                     | Redoxin domain protein                                                  |                                                                                                                                                                            |
| 864        | 0         | 113970671       | ref                                                            | YP_734470.1                                                             | thioredoxin-dependent thiol peroxidase                                                                                                                                     |
| 0          | 113885361 | db              | ABI39413.1                                                     | Redoxin domain protein                                                  |                                                                                                                                                                            |
| 865        | 1.23E-09  | 74317017        | ref                                                            | YP_314375.1                                                             | bacterioferritin comigratory protein                                                                                                                                       |
| 0          | 74056512  | db              | AA296992.1                                                     | bacterioferritin comigratory protein                                    |                                                                                                                                                                            |
| 866        | 2.42E-14  | 152991280       | ref                                                            | YP_001357002.1                                                          | peroxiredoxin family protein                                                                                                                                               |
| 0          | 151423141 | dbj             | BAF70645.1                                                     | peroxiredoxin family protein                                            |                                                                                                                                                                            |
| 867        | 0         | 189218991       | ref                                                            | YP_001939632.1                                                          | Peroxiredoxin                                                                                                                                                              |
| 0          | 189185849 | db              | ACD83034.1                                                     | Peroxiredoxin                                                           |                                                                                                                                                                            |
| 868        | 6.44E-15  | 50553470        | ref                                                            | XP_504148.1                                                             | YAL10E19448p                                                                                                                                                               |
| 0          | 49650015  | emb             | CAG71974.1                                                     | YAL10E19448p                                                            |                                                                                                                                                                            |
| 869        | 9.49E-19  | 188997152       | ref                                                            | YP_001931403.1                                                          | alkyl hydroperoxide reductase/ Thiol specific antioxidant/ Mal allergen                                                                                                    |
| 0          | 188932219 | db              | ACD68849.1                                                     | alkyl hydroperoxide reductase/ Thiol specific antioxidant/ Mal allergen |                                                                                                                                                                            |
| 870        | 1.05E-09  | 206895418       | ref                                                            | YP_002247412.1                                                          | bacterioferritin comigratory protein. AhpC/TSA family                                                                                                                      |
| 0          | 206738035 | db              | AC117113.1                                                     | bacterioferritin comigratory protein. AhpC/TSA family                   |                                                                                                                                                                            |
| 871        | 0         | 11950321        | ref                                                            | YP_01625295.1                                                           | putative bacterioferritin comigratory protein                                                                                                                              |
| 0          | 119460857 | db              | EAW41948.1                                                     | putative bacterioferritin comigratory protein                           |                                                                                                                                                                            |
| 872        | 0         | 118471271       | ref                                                            | YP_887530.1                                                             | peroxiredoxin Q                                                                                                                                                            |
| 0          | 118172568 | db              | ABK73454.1                                                     | peroxiredoxin Q                                                         |                                                                                                                                                                            |
| 873        | 1.33E-11  | 55379538        | ref                                                            | YP_137388.1                                                             | bacterioferritin comigratory protein                                                                                                                                       |
| 0          | 55232263  | db              | AAV41762.1                                                     | bacterioferritin comigratory protein                                    |                                                                                                                                                                            |
| 874        | 0         | 172041130       | ref                                                            | YP_001600844.1                                                          | bacterioferritin comigratory protein                                                                                                                                       |
| 0          | 171852434 | emb             | CA005410.1                                                     | bacterioferritin comigratory protein                                    |                                                                                                                                                                            |
| 875        | 5.88E-15  | 56750892        | ref                                                            | YP_171593.1                                                             | bacterioferritin comigratory protein                                                                                                                                       |
| 0          | 81299453  | ref             | YP_399863.1                                                    | bacterioferritin comigratory protein                                    |                                                                                                                                                                            |
| 0          | 5668851   | dbj             | BAQ79073.1                                                     | bacterioferritin comigratory protein                                    |                                                                                                                                                                            |
| 0          | 81168334  | db              | AB56674.1                                                      | bacterioferritin comigratory protein                                    |                                                                                                                                                                            |
| 876        | 8.06E-11  | 77463531        | ref                                                            | YP_353035.1                                                             | peroxiredoxin                                                                                                                                                              |
| 0          | 77463531  | db              | AB56674.1                                                      | Rhodobacter sphaeroideus 2.4-1                                          |                                                                                                                                                                            |

|           |     |                |                                                                                        |                                                        |
|-----------|-----|----------------|----------------------------------------------------------------------------------------|--------------------------------------------------------|
| 126462387 | ref | YP_001043501.1 | alkyl hydroperoxide reductase/ Thiol specific antioxidant/ Mal allergen                | Rhodobacter sphaeroideus ATCC 17029                    |
| 7387949   | gb  | ABA78134.1     | Peroxiredoxin                                                                          | Rhodobacter sphaeroideus 2.4.1                         |
| 126104051 | gb  | ABN78729.1     | alkyl hydroperoxide reductase/ Thiol specific antioxidant/ Mal allergen                | Rhodobacter sphaeroideus ATCC 17029                    |
| 7_55E-11  | ref | NP_420678.1    | bacterioferritin comigratory protein                                                   | Caulobacter crescentius CB15                           |
| 13423316  | gb  | AAK23846.1     | bacterioferritin comigratory protein                                                   | Caulobacter crescentius CB15                           |
| 2_47E-13  | ref | YP_001242728.1 | alkyl hydroperoxide reductase/ Thiol specific antioxidant/ Mal allergen                | Staphylococcus aureus subsp. aureus JH9                |
| 148263635 | ref | YP_001317072.1 | alkyl hydroperoxide reductase/ Thiol specific antioxidant/ Mal allergen                | Staphylococcus aureus subsp. aureus JH1                |
| 150394397 | ref | AF0449702.1    | alkyl hydroperoxide reductase/ Thiol specific antioxidant/ Mal allergen                | Staphylococcus aureus subsp. aureus JH9                |
| 147241404 | gb  | ABR52785.1     | alkyl hydroperoxide reductase/ Thiol specific antioxidant/ Mal allergen                | Staphylococcus aureus subsp. aureus JH1                |
| 149946849 | gb  | ABR52785.1     | bacterioferritin comigratory protein, thiol peroxidase, putative                       | Chlorobium tepidum TJS                                 |
| 880       | 0   | 21673494       | bacterioferritin comigratory protein                                                   | Plasmodium yoelii yoelii                               |
| 5_52E-14  | ref | AAAM7190.1     | AlpC/TSA family, putative                                                              | Plasmodium yoelii yoelii str. 17XNL                    |
| 82539279  | ref | XP_724040.1    | AlpC/TSA family, putative                                                              | Campylobacter coli RM12228                             |
| 23478548  | gb  | EAA15605.1     | AlpC/TSA family, putative                                                              | Campylobacter coli RM12228                             |
| 571683391 | ref | ZP_00367625.1  | bacterioferritin comigratory protein homolog GJ0271                                    | Arthrobacter chlorohemicolus A6                        |
| 57020189  | gb  | EAL58873.1     | bacterioferritin comigratory protein homolog GJ0271                                    | Arthrobacter chlorohemicolus A6                        |
| 169174463 | ref | ZP_02836364.1  | alkyl hydroperoxide reductase/ Thiol specific antioxidant/ Mal allergen                | Methylobacterium infernum V4                           |
| 189219838 | ref | YP_001940479.1 | Peroxiredoxin                                                                          | Methylobacterium infernum V4                           |
| 189186696 | gb  | ACD8388.1      | alkyl hydroperoxide reductase/ Thiol specific antioxidant/ Mal allergen                | Methylobacterium infernum V4                           |
| 209521353 | ref | ZP_03270067.1  | alkyl hydroperoxide reductase/ Thiol specific antioxidant/ Mal allergen                | Burkholderia sp. H160                                  |
| 209498212 | gb  | EDJ98353.1     | alkyl hydroperoxide reductase/ Thiol specific antioxidant/ Mal allergen                | Burkholderia sp. H160                                  |
| 15922428  | ref | NP_378097.1    | thioredoxin peroxidase                                                                 | Sulfolobus tokodaii str. 7                             |
| 15623217  | dbj | BA867206.1     | 150aa long hypothetical thioredoxin peroxidase                                         | Sulfolobus tokodaii str. 7                             |
| 196229972 | ref | ZP_03128836.1  | alkyl hydroperoxide reductase/ Thiol specific antioxidant/ Mal allergen                | Chthoniobacter flavus Elin428                          |
| 196228268 | gb  | EDJ_20804.1    | alkyl hydroperoxide reductase/ Thiol specific antioxidant/ Mal allergen                | Chthoniobacter flavus Elin428                          |
| 85705245  | ref | ZP_01036344.1  | AlpC/TSA family protein                                                                | Roseovarius sp. 217                                    |
| 85670118  | gb  | EAO24980.1     | AlpC/TSA family protein                                                                | Roseovarius sp. 217                                    |
| 196192803 | gb  | EDX87767.1     | Redoxin superfamily                                                                    | Synechococcus sp. PCC 7335                             |
| 7396065   | ref | YP_339640.1    | thioredoxin-dependent thiol peroxidase                                                 | Pseudocalteromonas haloplanctis TAC125                 |
| 76674976  | emb | CAI8619.1      | putative peroxidoxin                                                                   | Pseudocalteromonas haloplanctis TAC125                 |
| 88658558  | ref | YP_507352.1    | anti-oxidant AlpC/TSA family protein                                                   | Ehrlichia chaffeensis str. Arkansas                    |
| 16800015  | gb  | ABD04684.1     | antioxidant, AlpC/TSA family                                                           | Ehrlichia chaffeensis str. Arkansas                    |
| 210134335 | ref | YP_002300774.1 | bacterioferritin comigratory protein                                                   | Helicobacter pylori P12                                |
| 121013203 | gb  | ACJ07294.1     | bacterioferritin comigratory protein                                                   | Helicobacter pylori P12                                |
| 159026537 | emb | CAO86469.1     | unnamed protein product                                                                | Microcystis aeruginosa PCC 7806                        |
| 116252337 | ref | YP_768175.1    | putative AlpC-TSA family protein                                                       | Rhizobium leguminosarum bv. viciae 3841                |
| 115268985 | emb | CAK08079.1     | putative AlpC-TSA family protein                                                       | Rhizobium leguminosarum bv. viciae 3841                |
| 196238176 | ref | ZP_03136952.1  | alkyl hydroperoxide reductase/ Thiol specific antioxidant/ Mal allergen                | Cyanoshece sp. PCC 7425                                |
| 196217966 | gb  | EDY12609.1     | alkyl hydroperoxide reductase/ Thiol specific antioxidant/ Mal allergen                | Cyanoshece sp. PCC 7425                                |
| 58617228  | ref | YP_196427.1    | bacterioferritin comigratory protein                                                   | Ehrlichia ruminantium str. Gardel                      |
| 58416840  | emb | CAI27953.1     | Bacterioferritin comigratory protein                                                   | Ehrlichia ruminantium str. Gardel                      |
| 108762397 | ref | YP_634435.1    | AlpC/TSA family protein                                                                | Mycococcus xanthus DK 1622                             |
| 108466277 | gb  | ABF91462.1     | AlpC/TSA family protein                                                                | Mycococcus xanthus DK 1622                             |
| 37520075  | ref | NP_923452.1    | bacterioferritin comigratory protein                                                   | Gloeobacter violaceus PCC 7421                         |
| 35211067  | dbj | BAC38847.1     | bacterioferritin comigratory protein                                                   | Gloeobacter violaceus PCC 7421                         |
| 22298737  | ref | NP_681984.1    | bacterioferritin comigratory protein                                                   | Thermosynechococcus elongatus BP-1                     |
| 22294918  | dbj | BAC08746.1     | bacterioferritin comigratory protein                                                   | Thermosynechococcus elongatus BP-1                     |
| 75759483  | ref | ZP_00739574.1  | thioredoxin peroxidase                                                                 | Bacillus thuringiensis serovar israelensis AT CC 35646 |
| 74493901  | gb  | EAO56136.1     | thioredoxin peroxidase                                                                 | Bacillus thuringiensis serovar israelensis AT CC 35646 |
| 193078036 | gb  | ABO12962.2     | bacterioferritin comigratory protein                                                   | Acinetobacter baumannii ATCC 17978                     |
| 170732516 | ref | YP_001764463.1 | alkyl hydroperoxide reductase/ Thiol specific antioxidant/ Mal allergen                | Burkholderia cenocepacia MCO-3                         |
| 169815758 | gb  | ACA90341.1     | alkyl hydroperoxide reductase/ Thiol specific antioxidant/ Mal allergen                | Burkholderia cenocepacia MCO-3                         |
| 11080277  | ref | YP_697583.1    | AlpC/TSA family protein                                                                | Clostridium perfringens SM101                          |
| 110883278 | gb  | ABC86648.1     | AlpC/TSA family protein                                                                | Clostridium perfringens SM101                          |
| 87901398  | ref | ZP_01084239.1  | putative bacterioferritin comigratory (BCP) protein                                    | Synechococcus sp. WH 5701                              |
| 87284366  | gb  | EAQ76319.1     | putative bacterioferritin comigratory (BCP) protein                                    | Synechococcus sp. WH 5701                              |
| 212710880 | ref | ZP_03319008.1  | hypothetical protein PROVALCAL_01948                                                   | Providencia alcalifaciens DSM 30120                    |
| 212688657 | gb  | EEB48105.1     | hypothetical protein PROVALCAL_01948                                                   | Providencia alcalifaciens DSM 30120                    |
| 115468006 | ref | NP_001057052.1 | Ost06g0196300                                                                          | Oryza sativa (japonica cultivar-group)                 |
| 158517782 | ref | POC504.1       | PRXQ_ORYSJ RecName: Full=Putative peroxidoxin Q, chloroplast; PRXQ_ORYSJ               | Oryza sativa subsp. indica (Rice)                      |
| 158517783 | ref | POC505.1       | PRXQ_ORYSJ RecName: Full=Peroxidoxin Q, chloroplastic; AltName: Putative peroxidoxin Q | Oryza sativa subsp. japonica (Rice)                    |
| 51090743  | dbj | BAD35223.1     | putative peroxidoxin Q                                                                 | Oryza sativa Japonica Group                            |
| 113595092 | dbj | BAF18966.1     | Ost06g0196300                                                                          | Oryza sativa (japonica cultivar-group)                 |
| 215765468 | dbj | BAG87165.1     | unnamed protein product                                                                | Oryza sativa Japonica Group                            |
| 218197740 | gb  | EEC80167.1     | hypothetical protein Ost_22010                                                         | Oryza sativa Indica Group                              |
| 28899049  | ref | NP_798654.1    | thioredoxin-dependent thiol peroxidase                                                 | Vibrio parahaemolyticus RIMD 2210833                   |
| 28807268  | dbj | BAC60538.1     | bacterioferritin comigratory protein                                                   | Vibrio parahaemolyticus RIMD 2210833                   |
| 15602917  | ref | NP_245989.1    | thioredoxin-dependent thiol peroxidase                                                 | Pasteurella multocida subsp. multocida str. Pm70       |
| 12721387  | dbj | AAK03136.1     | Bcp                                                                                    | Pasteurella multocida subsp. multocida str. Pm70       |
| 89890726  | ref | ZP_01202235.1  | peroxidoxin, AlpC/Tsa family                                                           | Flavobacterium bacterium BBFL7                         |
| 89516871  | gb  | EAS19529.1     | peroxidoxin, AlpC/Tsa family                                                           | Flavobacterium bacterium BBFL7                         |

|     |          |            |     |                |                                                                         |                                        |                                               |
|-----|----------|------------|-----|----------------|-------------------------------------------------------------------------|----------------------------------------|-----------------------------------------------|
| 910 | 5.08E-14 | 118052435  | ref | ZP_01520982.1  | alkyl hydroperoxide reductase/ Thiol specific antioxidant/ Mal allergen | Comamonas testosteroni KF-1            | YFYPKDNTPGCTTEAMGvsrdSHDNFKFLEKLEvkglers      |
| 911 | 0        | 118000563  | db  | EAIV14720.1    | alkyl hydroperoxide reductase/ Thiol specific antioxidant/ Mal allergen | Comamonas testosteroni KF-1            | YFYPKDNTPGCTTEAMGvsrdSHDNFKFLEKLEKLEvkglers   |
| 911 | 0        | 108904609  | ref | YP_644546.1    | alkyl hydroperoxide reductase/ Thiol specific antioxidant/ Mal allergen | Rubrobacter xylanophilus DSM 9941      | YFYPKDNTPGCTTEAMGvsrdSHDNFKFLEKLEKLEvkglers   |
| 912 | 0        | 108768682  | gb  | ABG04734.1     | Redoxin                                                                 | Rubrobacter xylanophilus DSM 9941      | YFYPKDNTPGCTTEAMGvsrdSHDNFKFLEKLEKLEvkglers   |
| 912 | 0        | 2126335529 | ref | YP_002312054.1 | alkyl hydroperoxide reductase/ Thiol specific antioxidant/ Mal allergen | Shewanella piezotolerans WP3           | YFYPKASTPGCTVQAGcgspsdKPKLKFSDKQSYdghlri      |
| 913 | 0        | 212557013  | gb  | ACJ29487.1     | alkyl hydroperoxide reductase/ Thiol specific antioxidant/ Mal allergen | Shewanella piezotolerans WP3           | YFYPKASTPGCTVQAGcgspsdKPKLKFSDKQSYdghlri      |
| 913 | 0        | 157413324  | ref | YP_001484190.1 | alkyl hydroperoxide reductase/ Thiol specific antioxidant/ Mal allergen | Prochlorococcus marinus str. MIT 9215  | LVLGIIlyfypkdstlpgctkeacELKDKFKYNgjsad        |
| 914 | 1.33E-13 | 452395664  | ref | ABV50604.1     | alkyl hydroperoxide reductase/ Thiol specific antioxidant/ Mal allergen | Prochlorococcus marinus str. MIT 9215  | YFYPKDNTPGCTTEGGgjsrdsHDSHFQSKQKvrglrs        |
| 915 | 0        | 53755498   | emb | CAH16995.1     | hypothetical protein IP2752                                             | Legionella pneumophila str. Lens       | YFYPKDNTPGCTTEGGgjsrdsHDSHFQSKQKvrglrs        |
| 915 | 0        | 116786096  | gb  | ABK23972.1     | hypothetical protein                                                    | Picea sitchensis                       | PPVKIVSfypkdstlpgctkeacGISGDshkklakky         |
| 916 | 9.58E-12 | 103487665  | ref | YF_617226.1    | alkyl hydroperoxide reductase/ Thiol specific antioxidant/ Mal allergen | Spinopyxis alaskensis RB2256           | YFYPKADTPGCTTEAGavsrKGLGKFRDKYGYmgls          |
| 917 | 0        | 193215190  | ref | YF_001996379.1 | alkyl hydroperoxide reductase/ Thiol specific antioxidant/ Mal allergen | Spinopyxis alaskensis RB2256           | YFYPKADTPGCTTEAGavsrKGLGKFRDKYGYmgls          |
| 917 | 0        | 107100449  | ref | YF_922527.1    | alkyl hydroperoxide reductase/ Thiol specific antioxidant/ Mal allergen | Chloropecton thalassium ATCC 35110     | EVGSEAFyypkdstlpgctkeacGVSVDhkhkfaeye         |
| 918 | 2.26E-13 | 943010907  | ref | YF_584117.1    | alkyl hydroperoxide reductase/ Thiol specific antioxidant/ Mal allergen | Chloropecton thalassium ATCC 35110     | YFYPKDNTPGCTTEAMgirsrdsHSHFNKAKLEvrglrs       |
| 919 | 0        | 119715562  | ref | ABF09848.1     | alkyl hydroperoxide reductase/ Thiol specific antioxidant/ Mal allergen | Ralstonia metallidurans CH84           | YFYPKDNTPGCTTEAMgirsrdsHSHFNKAKLEvrglrs       |
| 920 | 0        | 169349662  | gb  | ABL80840.1     | alkyl hydroperoxide reductase/ Thiol specific antioxidant/ Mal allergen | Ralstonia metallidurans CH84           | YFYPKDNTPGCTTEAMgirsrdsHSHFNKAKLEvrglrs       |
| 921 | 1.33E-09 | 218961834  | ref | YP_001741609.1 | redoxin domain-containing protein                                       | Nocardioideae sp. JS614                | YFYPKADTPGCTTEAGcgspsdVEGVRSHrdldlri          |
| 922 | 3.65E-09 | 15698205   | ref | NP_249899.1    | Redoxin domain protein                                                  | Nocardioideae sp. JS614                | YFYPKADTPGCTTEAGcgspsdVEGVRSHrdldlri          |
| 922 | 0        | 167730491  | emb | CAO81403.1     | hypothetical protein CLOSP1_00400                                       | Clostridium sporotome DSM 1552         | YFYPKADTPGCTTEAGcgspsdVEGVRSHrdldlri          |
| 923 | 0        | 19437169   | ref | YP_002018963.1 | hypothetical protein PaerFA_01001474                                    | Clostridium sporotome DSM 1552         | YFYPKADTPGCTTEAGcgspsdVEGVRSHrdldlri          |
| 924 | 0        | 56963091   | ref | YP_174818.1    | alkyl hydroperoxide reductase/ Thiol specific antioxidant/ Mal allergen | Candidatus Cloacamonas acidaminovorans | FSHPADFVPCVTEFVfypkdstlpgctkeacGVSIDhkhkfaeye |
| 925 | 0        | 56909330   | db  | IBAD63857.1    | alkyl hydroperoxide reductase/ Thiol specific antioxidant/ Mal allergen | Candidatus Cloacamonas acidaminovorans | FSHPADFVPCVTEFVfypkdstlpgctkeacGVSIDhkhkfaeye |
| 926 | 3.90E-11 | 134293895  | ref | YP_001159675.1 | alkyl hydroperoxide reductase/ Thiol specific antioxidant/ Mal allergen | Candidatus Cloacamonas acidaminovorans | FSHPADFVPCVTEFVfypkdstlpgctkeacGVSIDhkhkfaeye |
| 927 | 1.16E-09 | 15937563   | ref | NP_298251.1    | alkyl hydroperoxide reductase/ Thiol specific antioxidant/ Mal allergen | Candidatus Cloacamonas acidaminovorans | FSHPADFVPCVTEFVfypkdstlpgctkeacGVSIDhkhkfaeye |
| 928 | 1.71E-14 | 218887946  | ref | ACL09789.1     | alkyl hydroperoxide reductase/ Thiol specific antioxidant/ Mal allergen | Pseudomonas aeruginosa PAO1            | TLSALyypkdstlpgctkeacGVSIDhkhkfaeye           |
| 929 | 3.92E-11 | 172060823  | ref | YP_001608475.1 | alkyl hydroperoxide reductase/ Thiol specific antioxidant/ Mal allergen | Pseudomonas aeruginosa PAO1            | TLSALyypkdstlpgctkeacGVSIDhkhkfaeye           |
| 930 | 0        | 171993340  | gb  | ACB64259.1     | alkyl hydroperoxide reductase/ Thiol specific antioxidant/ Mal allergen | Pseudomonas aeruginosa PAO1            | TLSALyypkdstlpgctkeacGVSIDhkhkfaeye           |
| 931 | 0        | 165928657  | ref | ZP_02222689.1  | alkyl hydroperoxide reductase/ Thiol specific antioxidant/ Mal allergen | Pseudomonas aeruginosa C3719           | YFYPKADTPGCTTEAGcgspsdVEGVRSHrdldlri          |
| 932 | 7.81E-11 | 28871102   | ref | NP_703721.1    | alkyl hydroperoxide reductase/ Thiol specific antioxidant/ Mal allergen | Pseudomonas aeruginosa C3719           | YFYPKADTPGCTTEAGcgspsdVEGVRSHrdldlri          |
| 933 | 5.61E-16 | 186683152  | ref | YP_001966812.1 | alkyl hydroperoxide reductase/ Thiol specific antioxidant/ Mal allergen | Pseudomonas aeruginosa C3719           | YFYPKADTPGCTTEAGcgspsdVEGVRSHrdldlri          |
| 934 | 0        | 197284525  | ref | YP_002151297.1 | alkyl hydroperoxide reductase/ Thiol specific antioxidant/ Mal allergen | Pseudomonas aeruginosa C3719           | YFYPKADTPGCTTEAGcgspsdVEGVRSHrdldlri          |
| 935 | 6.13E-13 | 21872423   | gb  | EED23640.1     | alkyl hydroperoxide reductase/ Thiol specific antioxidant/ Mal allergen | Pseudomonas aeruginosa C3719           | YFYPKADTPGCTTEAGcgspsdVEGVRSHrdldlri          |
| 936 | 0        | 163762166  | ref | ZP_02169232.1  | alkyl hydroperoxide reductase/ Thiol specific antioxidant/ Mal allergen | Pseudomonas aeruginosa C3719           | YFYPKADTPGCTTEAGcgspsdVEGVRSHrdldlri          |
| 937 | 0        | 42779671   | ref | NP_976918.1    | alkyl hydroperoxide reductase/ Thiol specific antioxidant/ Mal allergen | Pseudomonas aeruginosa C3719           | YFYPKADTPGCTTEAGcgspsdVEGVRSHrdldlri          |
| 938 | 2.95E-17 | 165976265  | ref | YP_001651858.1 | alkyl hydroperoxide reductase/ Thiol specific antioxidant/ Mal allergen | Pseudomonas aeruginosa C3719           | YFYPKADTPGCTTEAGcgspsdVEGVRSHrdldlri          |
| 939 | 0        | 165876366  | gb  | AB769414.1     | alkyl hydroperoxide reductase/ Thiol specific antioxidant/ Mal allergen | Pseudomonas aeruginosa C3719           | YFYPKADTPGCTTEAGcgspsdVEGVRSHrdldlri          |
| 939 | 0        | 168051403  | ref | XP_001778144.1 | alkyl hydroperoxide reductase/ Thiol specific antioxidant/ Mal allergen | Pseudomonas aeruginosa C3719           | YFYPKADTPGCTTEAGcgspsdVEGVRSHrdldlri          |



|     |          |                              |                                                                         |                                                                         |                                     |
|-----|----------|------------------------------|-------------------------------------------------------------------------|-------------------------------------------------------------------------|-------------------------------------|
| 940 | 3.44E-16 | 162670466 qb ED057034.1      | predicted protein                                                       | alkyl hydroperoxide reductase/ Thiol specific antioxidant/ Mal allergen | Physcomitrella patens subsp. patens |
|     |          | 196244566 ref ZP_03144289.1  | alkyl hydroperoxide reductase/ Thiol specific antioxidant/ Mal allergen | Cyanosche sp. PCC 8802                                                  |                                     |
|     |          | 192003633 qb EDY01329.1      | alkyl hydroperoxide reductase/ Thiol specific antioxidant/ Mal allergen | Cyanosche sp. PCC 8802                                                  |                                     |
|     |          | 160900654 ref YP_001566236.1 | alkyl hydroperoxide reductase/ Thiol specific antioxidant/ Mal allergen | Deiflia acidovorans SPH-1                                               |                                     |
|     |          | 160366238 qb ABX37851.1      | alkyl hydroperoxide reductase/ Thiol specific antioxidant/ Mal allergen | Deiflia acidovorans SPH-1                                               |                                     |
|     |          | 83857587 ref ZP_00951115.1   | alkyl hydroperoxide reductase/ Thiol specific antioxidant/ Mal allergen | Croceibacter atlanticus HTCC2559                                        |                                     |
|     |          | 83849854 qb EAP26823.1       | bacterioferritin comigratory protein, thiol peroxidase, putative        | Croceibacter atlanticus HTCC2559                                        |                                     |
|     |          | 487923766 ref YP_001895428.1 | bacterioferritin comigratory protein, thiol peroxidase, putative        | Burkholderia phytofirmans PsJN                                          |                                     |
|     |          | 187714980 qb ACD16204.1      | alkyl hydroperoxide reductase/ Thiol specific antioxidant/ Mal allergen | Burkholderia phytofirmans PsJN                                          |                                     |
|     |          | 59800774 ref YP_0027486.1    | hypothetical protein NGO0328                                            | Neisseria gonorrhoeae FA 1090                                           |                                     |
|     |          | 59717669 qb AAW89074.1       | conserved hypothetical protein                                          | Neisseria gonorrhoeae FA 1090                                           |                                     |
|     |          | 148263675 ref YP_001244135.1 | nitroreductase                                                          | Thermotoga petrophila RKU-1                                             |                                     |
|     |          | 147735219 qb ABQ46559.1      | nitroreductase                                                          | Thermotoga petrophila RKU-1                                             |                                     |
|     |          | 214040565 qb EE881213.1      | bacterioferritin comigratory protein/NADH dehydrogenase                 | Marinotoga piezophila KA3                                               |                                     |
|     |          | 187478656 ref YP_786680.1    | antioxidant protein                                                     | Bordetella avium 197N                                                   |                                     |
|     |          | 115423242 emb CAJ49775.1     | putative antioxidant protein                                            | Bordetella avium 197N                                                   |                                     |
|     |          | 217034184 ref ZP_03439603.1  | hypothetical protein HP9810_886921                                      | Helicobacter pylori 98-10                                               |                                     |
|     |          | 216943352 qb EEC22811.1      | hypothetical protein HP9810_886921                                      | Helicobacter pylori 98-10                                               |                                     |
|     |          | 149914722 ref ZP_01903252.1  | alkyl hydroperoxide reductase/ Thiol specific antioxidant/ Mal allergen | Roseobacter sp. AzwK-3b                                                 |                                     |
|     |          | 149811515 qb EDM71350.1      | alkyl hydroperoxide reductase/ Thiol specific antioxidant/ Mal allergen | Roseobacter sp. AzwK-3b                                                 |                                     |
|     |          | 166367233 ref YP_001659506.1 | bacterioferritin comigratory protein                                    | Microcystis aeruginosa NIES-843                                         |                                     |
|     |          | 166089606 qb BAQ04314.1      | bacterioferritin comigratory protein homolog                            | Microcystis aeruginosa NIES-843                                         |                                     |
|     |          | 113953387 ref YP_731702.1    | bacterioferritin comigratory protein                                    | Synechococcus sp. CC9311                                                |                                     |
|     |          | 113880738 qb ABI45696.1      | bacterioferritin comigratory protein                                    | Synechococcus sp. CC9311                                                |                                     |
|     |          | 115361853 ref YP_773892.1    | alkyl hydroperoxide reductase/ Thiol specific antioxidant/ Mal allergen | Burkholderia ambifaria AMMD                                             |                                     |
|     |          | 115281841 qb ABI87398.1      | alkyl hydroperoxide reductase/ Thiol specific antioxidant/ Mal allergen | Burkholderia ambifaria AMMD                                             |                                     |
|     |          | 110880198 ref YP_683205.1    | bacterioferritin comigratory protein                                    | Roseobacter denitrificans OCH 114                                       |                                     |
|     |          | 109456314 qb ABG32519.1      | bacterioferritin comigratory protein                                    | Roseobacter denitrificans OCH 114                                       |                                     |
|     |          | 118472116 ref YP_889011.1    | antioxidant, AhpC/TSA family protein                                    | Mycobacterium smegmatis str. MC2 155                                    |                                     |
|     |          | 118173403 qb ABK74299.1      | antioxidant, AhpC/TSA family protein                                    | Mycobacterium smegmatis str. MC2 155                                    |                                     |
|     |          | 184200729 ref YP_001854936.1 | putative peroxiredoxin                                                  | Kouarea thizophila DC2201                                               |                                     |
|     |          | 183860859 qb BAQ29430.1      | putative peroxiredoxin                                                  | Kouarea thizophila DC2201                                               |                                     |
|     |          | 37522958 ref NP_926335.1     | bacterioferritin comigratory protein                                    | Gloeobacter violaceus PCC 7421                                          |                                     |
|     |          | 35213960 qb BAQ91330.1       | bacterioferritin comigratory protein                                    | Gloeobacter violaceus PCC 7421                                          |                                     |
|     |          | 126695718 ref YP_001090604.1 | putative bacterioferritin comigratory protein                           | Prochlorococcus marinus str. MIT 9301                                   |                                     |
|     |          | 126642761 qb ABO17003.1      | putative bacterioferritin comigratory protein                           | Prochlorococcus marinus str. MIT 9301                                   |                                     |
|     |          | 197940186 ref ZP_03178006.1  | bacterioferritin comigratory protein                                    | Streptomyces sp. SPB74                                                  |                                     |
|     |          | 197763764 ref YP_002186922.1 | bacterioferritin comigratory protein                                    | Streptomyces sp. SPB74                                                  |                                     |
|     |          | 197697484 qb EDY44417.1      | bacterioferritin comigratory protein                                    | Streptomyces sp. SPB74                                                  |                                     |
|     |          | 167762575 ref ZP_02434702.1  | hypothetical protein BACSTE_00931                                       | Bacteroides stercoris ATCC 43183                                        |                                     |
|     |          | 167699661 qb EDS18260.1      | hypothetical protein BACSTE_00931                                       | Bacteroides stercoris ATCC 43183                                        |                                     |
|     |          | 27365256 ref NP_760784.1     | thioredoxin-dependent thiol peroxidase                                  | Vibrio vulnificus CMCP6                                                 |                                     |
|     |          | 27361403 qb JAAO10311.1      | AED18803_98 Bacterioferritin comigratory protein                        | Vibrio vulnificus CMCP6                                                 |                                     |
|     |          | 209574088 qb ACI62992.1      | peroxiredoxin AhpC-Tsa family protein                                   | Acidithiobacillus caldus                                                |                                     |
|     |          | 33863889 ref NP_895449.1     | putative bacterioferritin comigratory protein (BCP) protein             | Prochlorococcus marinus str. MIT 9313                                   |                                     |
|     |          | 33635422 emb CAE21797.1      | putative bacterioferritin comigratory protein                           | Prochlorococcus marinus str. MIT 9313                                   |                                     |
|     |          | 194535571 ref YP_002070743.1 | bacterioferritin comigratory protein                                    | Vibrio cholerae RC385                                                   |                                     |
|     |          | 150420365 qb EDN1266.1       | bacterioferritin comigratory protein                                    | Vibrio cholerae RC385                                                   |                                     |
|     |          | 193212328 ref YP_001998281.1 | alkyl hydroperoxide reductase/ Thiol specific antioxidant/ Mal allergen | Chlorobaculum parvum NCIB 8327                                          |                                     |
|     |          | 193085605 qb ACF 11081.1     | alkyl hydroperoxide reductase/ Thiol specific antioxidant/ Mal allergen | Chlorobaculum parvum NCIB 8327                                          |                                     |
|     |          | 126667511 ref ZP_01738482.1  | AhpC/TSA family protein                                                 | Marinobacter sp. ELB17                                                  |                                     |
|     |          | 126628103 qb EAZ98729.1      | AhpC/TSA family protein                                                 | Marinobacter sp. ELB17                                                  |                                     |
|     |          | 126458692 ref YP_001054970.1 | alkyl hydroperoxide reductase/ Thiol specific antioxidant/ Mal allergen | Pyrobaculum caldifontis JCM 11548                                       |                                     |
|     |          | 126248413 qb ABO07504.1      | alkyl hydroperoxide reductase/ Thiol specific antioxidant/ Mal allergen | Pyrobaculum caldifontis JCM 11548                                       |                                     |
|     |          | 16821828 ref ZP_02633851.1   | antioxidant, AhpC/TSA family                                            | Clostridium perfringens B str. JGS 1987                                 |                                     |
|     |          | 169344705 ref ZP_02865668.1  | antioxidant, AhpC/TSA family                                            | Clostridium perfringens B str. JGS 1987                                 |                                     |
|     |          | 169297172 qb EDS79286.1      | antioxidant, AhpC/TSA family                                            | Clostridium perfringens C str. JGS1495                                  |                                     |
|     |          | 170660847 qb EDT13530.1      | antioxidant, AhpC/TSA family                                            | Clostridium perfringens B str. JGS 1987                                 |                                     |
|     |          | 170710223 qb EDT122405.1     | antioxidant, AhpC/TSA family                                            | Clostridium perfringens B str. ATCC 3626                                |                                     |
|     |          | 158339081 ref YP_001520258.1 | alkyl hydroperoxide reductase/Thiol specific antioxidant family protein | Acarochlois marina MBIC11017                                            |                                     |
|     |          | 158309322 qb ABW30939.1      | alkyl hydroperoxide reductase/Thiol specific antioxidant family protein | Acarochlois marina MBIC11017                                            |                                     |
|     |          | 151943147 qb EDM61482.1      | thioredoxin peroxidase                                                  | Saccharomyces cerevisiae YJM789                                         |                                     |
|     |          | 190408233 qb EDY09500.1      | peroxiredoxin D015                                                      | Saccharomyces cerevisiae RM11-1a                                        |                                     |
|     |          | 208780124 ref ZP_03247467.1  | antioxidant, AhpC/TSA family protein                                    | Francisella novicida FTG                                                |                                     |
|     |          | 208744128 qb EDZ90429.1      | antioxidant, AhpC/TSA family protein                                    | Francisella novicida FTG                                                |                                     |
|     |          | 13235522 emb CAC33649.1      | Bacterioferritin comigratory protein                                    | Rickettsia montanensis                                                  |                                     |
|     |          | 149179925 ref ZP_01857503.1  | bacterioferritin comigratory protein                                    | Planctomycetes maris DSM 8797                                           |                                     |
|     |          | 148842264 qb EDI_56649.1     | bacterioferritin comigratory protein                                    | Planctomycetes maris DSM 8797                                           |                                     |
|     |          | 85059706 ref YP_455408.1     | thioredoxin-dependent thiol peroxidase                                  | Sodalis glossinidius str. 'moritans'                                    |                                     |
|     |          | 84780226 qb BAE15003.1       | bacterioferritin comigratory protein                                    | Sodalis glossinidius str. 'moritans'                                    |                                     |

|      |          |               |                |                                                                         |                                                     |  |                                         |
|------|----------|---------------|----------------|-------------------------------------------------------------------------|-----------------------------------------------------|--|-----------------------------------------|
| 973  | 8.33E-13 | 126735607.ref | ZP_01751352.1  | alkyl hydroperoxide reductase/ Thiol specific antioxidant/ Mal allergen | Roseobacter sp. CCS2                                |  | YLSDFAGKVIYFKDKIDPDKCQKALGYSKDAQGIKQ    |
| 974  | 1.31E-10 | 126714794.gb  | EBAA11660.1    | alkyl hydroperoxide reductase/ Thiol specific antioxidant/ Mal allergen | Roseobacter sp. CCS2                                |  | YFYPKDNTPGCTTQGGQYSDTHENFKAKKQSYGVYDS   |
| 975  | 2.19E-11 | 66044792.ref  | YP_2346833.1   | alkyl hydroperoxide reductase/ Thiol specific antioxidant/ Mal allergen | Pseudomonas syringae pv. syringae B72Ba             |  | YFYPKDSSTPGCTTEGLSHUNTCAGKVLGIERSLISPD  |
| 976  | 4.11E-14 | 63255489.gb   | AA736595.1     | alkyl hydroperoxide reductase/ Thiol specific antioxidant/ Mal allergen | Pseudomonas syringae pv. syringae B72Ba             |  | KPSATKSSAIFfYpkampicreaiGVASDfqiirt     |
| 977  | 2.71E-16 | 188575943.gb  | YP_001912872.1 | bacterioferritin comigratory protein                                    | Xanthomonas oryzae pv. oryzae PXO99A                |  | YFYPKALTPGCTTQACGJSPDKLAQHIEKKEydgihri  |
| 978  | 0        | 188520395.gb  | ACD568340.1    | alkyl hydroperoxide reductase/ Thiol specific antioxidant/ Mal allergen | Xanthomonas oryzae pv. oryzae PXO99A                |  | SLDGFAGKKYfYpkamipgctvtqagVSDyIDydgihri |
| 979  | 0        | 192291113.ref | ZP_02299011.1  | alkyl hydroperoxide reductase/ Thiol specific antioxidant/ Mal allergen | Rhodopseudomonas palustris TIE-1                    |  | YFYPKDNTPGCTKEAVGSDIASHKHFIEKFNKmgiers  |
| 980  | 0        | 192284862.gb  | ACF01243.1     | alkyl hydroperoxide reductase/ Thiol specific antioxidant/ Mal allergen | Rhodopseudomonas palustris TIE-1                    |  | YFYPKASITPGCTVQAGJSPDKLARLSDKQSYDGihri  |
| 981  | 0        | 428279178.ref | ZP_00155263.1  | COG1225: Peroxiredoxin                                                  | Haemophilus influenzae R2644                        |  | YFYPKDNTPGCTLEAKGVSPDSHQKFISSOCShwgiers |
| 982  | 0        | 145631072.ref | ZP_01786684.1  | bacterioferritin comigratory protein                                    | Haemophilus influenzae R2644                        |  | YFYPKDNTPGCTTQACGJSPDKLAQHIEKKEydgihri  |
| 983  | 0        | 14983357.gb   | EDJ90839.1     | thioredoxin-dependent thiol peroxidase                                  | Haemophilus influenzae R3021                        |  | YFYPKASITPGCTVQAGJSPDKLARLSDKQSYDGihri  |
| 984  | 0        | 148718639.gb  | ABC09766.1     | bacterioferritin comigratory protein                                    | Haemophilus influenzae R3021                        |  | YFYPKDNTPGCTLEAKGVSPDSHQKFISSOCShwgiers |
| 985  | 0        | 207109511.ref | ZP_03243673.1  | bacterioferritin comigratory protein                                    | Helicobacter pylori HPXX_438_CAG0C1                 |  | YFYPKASITPGCTVQAGJSPDKLARLSDKQSYDGihri  |
| 986  | 0        | 166856144.gb  | ABY94552.1     | alkyl hydroperoxide reductase/ Thiol specific antioxidant/ Mal allergen | Vibrio harvey ATCC BAA-1116                         |  | YFYPKDNTPGCTTQACGJSPDKLAQHIEKKEydgihri  |
| 987  | 0        | 169811873.gb  | ACA86457.1     | alkyl hydroperoxide reductase/ Thiol specific antioxidant/ Mal allergen | Shewanella woodyi ATCC 51908                        |  | YFYPKASITPGCTVQAGJSPDKLARLSDKQSYDGihri  |
| 988  | 0        | 207092425.ref | ZP_03240212.1  | bacterioferritin comigratory protein                                    | Helicobacter pylori HPXX_438_CAG0C1                 |  | YFYPKDNTPGCTLEAKGVSPDSHQKFISSOCShwgiers |
| 989  | 0        | 156875458.ref | YP_001446385.1 | thioredoxin-dependent thiol peroxidase                                  | Vibrio harvey ATCC BAA-1116                         |  | YFYPKASITPGCTVQAGJSPDKLARLSDKQSYDGihri  |
| 990  | 0        | 161869694.ref | YP_001598861.1 | bacterioferritin comigratory protein                                    | Neisseria meningitidis 053442                       |  | YFYPKDNTPGCTTQACGJSPDKLAQHIEKKEydgihri  |
| 991  | 0        | 161869694.ref | YP_001598861.1 | bacterioferritin comigratory protein                                    | Neisseria meningitidis 053442                       |  | YFYPKDNTPGCTTQACGJSPDKLAQHIEKKEydgihri  |
| 992  | 0        | 196949488.ref | YP_933701.1    | putative bacterioferritin comigratory protein                           | Azoarcus sp. BH72                                   |  | YFYPKDNTPGCTTQACGJSPDKLAQHIEKKEydgihri  |
| 993  | 0        | 119670901.emb | CAL94814.1     | putative bacterioferritin comigratory protein                           | Azoarcus sp. BH72                                   |  | YFYPKDNTPGCTTQACGJSPDKLAQHIEKKEydgihri  |
| 994  | 0        | 15418802.gb   | AAK67508.1     | peroxiredoxin                                                           | Protonibacterium freudenreichii subsp. shermanii    |  | YFYPKASITPGCTVQAGJSPDKLARLSDKQSYDGihri  |
| 995  | 0        | 15899027.ref  | NP_343633.2    | Peroxiredoxin, bacterioferritin comigratory protein homolog (bcp-3)     | Sulfobobus solifarius P2                            |  | YFYPKASITPGCTVQAGJSPDKLARLSDKQSYDGihri  |
| 996  | 0        | 13615558.gb   | AAK42422.1     | thioredoxin-dependent thiol peroxidase                                  | Sulfobobus solifarius P2                            |  | YFYPKASITPGCTVQAGJSPDKLARLSDKQSYDGihri  |
| 997  | 0        | 109893795.ref | YP_662050.1    | thioredoxin-dependent thiol peroxidase                                  | Pseudocitronomonas atlantica T6c                    |  | YFYPKASITPGCTVQAGJSPDKLARLSDKQSYDGihri  |
| 998  | 0        | 109701076.gb  | ABC040996.1    | Redoxin                                                                 | Pseudocitronomonas atlantica T6c                    |  | YFYPKASITPGCTVQAGJSPDKLARLSDKQSYDGihri  |
| 999  | 0        | 212223935.ref | YP_002307171.1 | Hypothetical peroxiredoxin, bacterioferritin comigratory protein        | Thermococcus onnurineus NA1                         |  | YFYPKASITPGCTVQAGJSPDKLARLSDKQSYDGihri  |
| 1000 | 0        | 212008892.gb  | ACJ16274.1     | Hypothetical peroxiredoxin, bacterioferritin comigratory protein        | Thermococcus onnurineus NA1                         |  | YFYPKASITPGCTVQAGJSPDKLARLSDKQSYDGihri  |
| 1001 | 0        | 167562233.gb  | ZP_0235149.1   | antioxidant, AtpC/TSA family protein                                    | Burkholderia oklahomaensis EO147                    |  | YFYPKASITPGCTVQAGJSPDKLARLSDKQSYDGihri  |
| 1002 | 0        | 537125016.ref | YP_084988.1    | putative bacterioferritin co-migratory protein                          | Bacteroides fragilis YCH46                          |  | YFYPKASITPGCTVQAGJSPDKLARLSDKQSYDGihri  |
| 1003 | 0        | 52216371.gb   | BA047964.1     | putative bacterioferritin co-migratory protein                          | Bacteroides fragilis YCH46                          |  | YFYPKASITPGCTVQAGJSPDKLARLSDKQSYDGihri  |
| 1004 | 0        | 190571297.ref | YP_001975655.1 | bacterioferritin comigratory protein                                    | Wobachia endosymbiont of Culex quinquefasciatus Pel |  | YFYPKASITPGCTVQAGJSPDKLARLSDKQSYDGihri  |
| 1005 | 0        | 213018694.ref | ZP_03334502.1  | bacterioferritin comigratory protein                                    | Wobachia endosymbiont of Culex quinquefasciatus Pel |  | YFYPKASITPGCTVQAGJSPDKLARLSDKQSYDGihri  |
| 1006 | 0        | 190357569.emb | CAO50008.1     | bacterioferritin comigratory protein                                    | Wobachia endosymbiont of Culex quinquefasciatus Pel |  | YFYPKASITPGCTVQAGJSPDKLARLSDKQSYDGihri  |
| 1007 | 0        | 212995645.gb  | EEB56285.1     | bacterioferritin comigratory protein                                    | Oceanobacillus theyensis HTE831                     |  | YFYPKASITPGCTVQAGJSPDKLARLSDKQSYDGihri  |
| 1008 | 0        | 230983358.ref | NP_691824.1    | bacterioferritin comigratory protein                                    | Oceanobacillus theyensis HTE831                     |  | YFYPKASITPGCTVQAGJSPDKLARLSDKQSYDGihri  |
| 1009 | 0        | 22776584.gb   | BAC12859.1     | bacterioferritin comigratory protein                                    | Dichelobacter nodosus VCS1703A                      |  | YFYPKASITPGCTVQAGJSPDKLARLSDKQSYDGihri  |
| 1010 | 0        | 146328680.ref | YP_001209467.1 | alkyl hydroperoxide reductase/thiol specific antioxidant family protein | Dichelobacter nodosus VCS1703A                      |  | YFYPKASITPGCTVQAGJSPDKLARLSDKQSYDGihri  |
| 1011 | 0        | 146232150.gb  | ABQ13128.1     | alkyl hydroperoxide reductase/thiol specific antioxidant family protein | Dichelobacter nodosus VCS1703A                      |  | YFYPKASITPGCTVQAGJSPDKLARLSDKQSYDGihri  |
| 1012 | 0        | 336658141.ref | NP_897373.1    | alkyl hydroperoxide reductase/ Thiol specific antioxidant/ Mal allergen | Synechococcus sp. WH 8102                           |  | YFYPKASITPGCTVQAGJSPDKLARLSDKQSYDGihri  |
| 1013 | 0        | 33632984.emb  | CAE07795.1     | alkyl hydroperoxide reductase/ Thiol specific antioxidant/ Mal allergen | Synechococcus sp. WH 8102                           |  | YFYPKASITPGCTVQAGJSPDKLARLSDKQSYDGihri  |
| 1014 | 0        | 209910005.ref | ZP_03284489.1  | hypothetical protein ENTCAN_04321                                       | Enterobacter cancerogenus ATCC 35316                |  | YFYPKASITPGCTVQAGJSPDKLARLSDKQSYDGihri  |
| 1015 | 0        | 209898600.gb  | EEA12299.1     | hypothetical protein ENTCAN_04321                                       | Enterobacter cancerogenus ATCC 35316                |  | YFYPKASITPGCTVQAGJSPDKLARLSDKQSYDGihri  |
| 1016 | 0        | 149202019.ref | ZP_01879064.1  | alkyl hydroperoxide reductase/ Thiol specific antioxidant/ Mal allergen | Roseovarius sp. TM1035                              |  | YFYPKASITPGCTVQAGJSPDKLARLSDKQSYDGihri  |
| 1017 | 0        | 149144189.gb  | EDM32220.1     | alkyl hydroperoxide reductase/ Thiol specific antioxidant/ Mal allergen | Roseovarius sp. TM1035                              |  | YFYPKASITPGCTVQAGJSPDKLARLSDKQSYDGihri  |
| 1018 | 0        | 212698228.ref | ZP_033063556.1 | hypothetical protein BACFIN_00681                                       | Bacteroides finegoldii DSM 17565                    |  | YFYPKASITPGCTVQAGJSPDKLARLSDKQSYDGihri  |
| 1019 | 0        | 212670732.gb  | EEB31323.1     | hypothetical protein BACFIN_00681                                       | Bacteroides finegoldii DSM 17565                    |  | YFYPKASITPGCTVQAGJSPDKLARLSDKQSYDGihri  |
| 1020 | 0        | 116328649.ref | YP_799368.1    | bacterioferritin comigratory protein                                    | Leptospira borgpetersenii serovar Hardjo-bovis L550 |  | YFYPKASITPGCTVQAGJSPDKLARLSDKQSYDGihri  |
| 1021 | 0        | 116328649.ref | YP_799368.1    | bacterioferritin comigratory protein                                    | Leptospira borgpetersenii serovar Hardjo-bovis L550 |  | YFYPKASITPGCTVQAGJSPDKLARLSDKQSYDGihri  |
| 1022 | 0        | 11612542.gb   | ABJ0435.1      | Bacterioferritin comigratory protein                                    | Leptospira borgpetersenii serovar Hardjo-bovis L550 |  | YFYPKASITPGCTVQAGJSPDKLARLSDKQSYDGihri  |
| 1023 | 0        | 11612402.gb   | ABJ77494.1     | Bacterioferritin comigratory protein                                    | Leptospira borgpetersenii serovar Hardjo-bovis L550 |  | YFYPKASITPGCTVQAGJSPDKLARLSDKQSYDGihri  |
| 1024 | 0        | 124363009.gb  | ABN06817.1     | hypothetical protein Mab_0644                                           | Methanococcus marisnigri DSM 11463                  |  | YFYPKASITPGCTVQAGJSPDKLARLSDKQSYDGihri  |
| 1025 | 0        | 19509135.ref  | ZP_01628286.1  | alkyl hydroperoxide reductase/ Thiol specific antioxidant/ Mal allergen | Methanococcus marisnigri DSM 11463                  |  | YFYPKASITPGCTVQAGJSPDKLARLSDKQSYDGihri  |
| 1026 | 0        | 119466301.gb  | EAIV47187.1    | alkyl hydroperoxide reductase/ Thiol specific antioxidant/ Mal allergen | Nodularia spumigena CCY9414                         |  | YFYPKASITPGCTVQAGJSPDKLARLSDKQSYDGihri  |
| 1027 | 0        | 148556714.ref | YP_001264403.1 | alkyl hydroperoxide reductase/ Thiol specific antioxidant/ Mal allergen | Nodularia spumigena CCY9414                         |  | YFYPKASITPGCTVQAGJSPDKLARLSDKQSYDGihri  |
| 1028 | 0        | 148502011.gb  | ABQ070265.1    | alkyl hydroperoxide reductase/ Thiol specific antioxidant/ Mal allergen | Spinomonas wittichii RW1                            |  | YFYPKASITPGCTVQAGJSPDKLARLSDKQSYDGihri  |
| 1029 | 0        | 217071008.ref | YP_002334824.1 | bacterioferritin comigratory protein, AtpC/TSA family                   | Spinomonas wittichii RW1                            |  | YFYPKASITPGCTVQAGJSPDKLARLSDKQSYDGihri  |
| 1030 | 0        | 217038961.gb  | ACJ75483.1     | bacterioferritin comigratory protein, AtpC/TSA family                   | Thermosiphon africanus TCF-52B                      |  | YFYPKASITPGCTVQAGJSPDKLARLSDKQSYDGihri  |
| 1031 | 0        | 320333224.ref | YP_00135320.1  | COG1225: Peroxiredoxin                                                  | Thermosiphon africanus TCF-52B                      |  | YFYPKASITPGCTVQAGJSPDKLARLSDKQSYDGihri  |
| 1032 | 0        | 126208322.ref | YP_001053547.1 | thioredoxin-dependent thiol peroxidase                                  | Actinobacillus pleuropneumoniae serovar 1 str. 4074 |  | YFYPKASITPGCTVQAGJSPDKLARLSDKQSYDGihri  |
| 1033 | 0        | 126097114.gb  | ABN73942.1     | putative peroxiredoxin Bop                                              | Actinobacillus pleuropneumoniae L20                 |  | YFYPKASITPGCTVQAGJSPDKLARLSDKQSYDGihri  |
| 1034 | 0        | 148255347.ref | YP_001239932.1 | hypothetical protein BBta_3956                                          | Bradyrhizobium sp. BTA1                             |  | YFYPKASITPGCTVQAGJSPDKLARLSDKQSYDGihri  |
| 1035 | 0        | 146407520.gb  | ABC03626.1     | hypothetical protein BBta_3956                                          | Bradyrhizobium sp. BTA1                             |  | YFYPKASITPGCTVQAGJSPDKLARLSDKQSYDGihri  |
| 1036 | 0        | 169632729.ref | YP_001706465.1 | bacterioferritin comigratory protein                                    | Acinetobacter baumannii SDF                         |  | YFYPKASITPGCTVQAGJSPDKLARLSDKQSYDGihri  |

|      |          |               |                |                                                                         |                                                         |
|------|----------|---------------|----------------|-------------------------------------------------------------------------|---------------------------------------------------------|
|      |          | 169795073.ref | YP_001712866.1 | bacterioferritin comigratory protein                                    | Acinetobacter baumannii AYE                             |
|      |          | 213158265.ref | YP_002320316.1 | bacterioferritin comigratory protein                                    | Acinetobacter baumannii AB0057                          |
|      |          | 215482623.ref | YP_002320481.1 | AhpC/TSA family protein                                                 | Acinetobacter baumannii AB307-0294                      |
|      |          | 169148000.emb | CAI065963.1    | bacterioferritin comigratory protein                                    | Acinetobacter baumannii                                 |
|      |          | 169151521.emb | CAP00286.1     | bacterioferritin comigratory protein                                    | Acinetobacter baumannii                                 |
|      |          | 213057425.gb  | ACJ42327.1     | bacterioferritin comigratory protein                                    | Acinetobacter baumannii AB0057                          |
|      |          | 213987727.gb  | ACJ58026.1     | AhpC/TSA family protein                                                 | Acinetobacter baumannii AB307-0294                      |
| 1006 | 8.66E-15 | 167627034.ref | YP_001677534.1 | bacterioferritin comigratory protein                                    | Francisella philomiragia subsp. philomiragia ATCC 25017 |
| 1007 | 5.34E-13 | 149918477.ref | YP_01906967.1  | bacterioferritin comigratory protein                                    | Francisella philomiragia subsp. philomiragia ATCC 25017 |
|      |          | 149820777.gb  | EDM80187.1     | antioxidant. AhpC/Tsa family protein                                    | Plesiocystis pacifica SIR-1                             |
|      |          | 31793702.ref  | NP_856195.1    | antioxidant. AhpC/Tsa family protein                                    | Mycobacterium bovis AF2122/97                           |
| 1008 | 0        | 31619295.emb  | CAD97411.1     | PROBABLE BACTERIOFERRITIN COMIGRATORY PROTEIN BCP                       | Mycobacterium bovis AF2122/97                           |
| 1009 | 1.96E-10 | 489220134.ref | YP_001940774.1 | Peroxioredoxin                                                          | Methylobacterium inferorum V4                           |
|      |          | 169186982.gb  | ACI084177.1    | Peroxioredoxin                                                          | Methylobacterium inferorum V4                           |
| 1010 | 8.40E-13 | 145990363.ref | YP_001152385.1 | alkyl hydroperoxide reductase/ Thiol specific antioxidant/ Mai allergen | Pyrobaculum arsenaticum DSM 13514                       |
|      |          | 145282131.gb  | ABP48713.1     | alkyl hydroperoxide reductase/ Thiol specific antioxidant/ Mai allergen | Pyrobaculum arsenaticum DSM 13514                       |
| 1011 | 4.79E-12 | 116624029.ref | YP_826185.1    | redoxin domain-containing protein                                       | Solibacter ustulatus Ellim6076                          |
|      |          | 116227191.gb  | AB_185900.1    | Redoxin domain protein                                                  | Solibacter ustulatus Ellim6076                          |
| 1012 | 0        | 153813080.ref | YP_01965748.1  | hypothetical protein RUMOBE_03488                                       | Ruminococcus obeum ATCC 29174                           |
|      |          | 149830882.gb  | EDM85972.1     | hypothetical protein RUMOBE_03488                                       | Ruminococcus obeum ATCC 29174                           |
| 1013 | 3.86E-09 | 197621838.gb  | EDY34418.1     | Redoxin superfamily                                                     | Aciduliprofundum boonei T469                            |
| 1014 | 0        | 153951008.ref | YP_001398680.1 | anti-oxidant AhpC/TSA family protein                                    | Campylobacter jejuni subsp. doylei 269.97               |
|      |          | 152938454.gb  | ABS43195.1     | antioxidant. AhpC/Tsa family                                            | Campylobacter jejuni subsp. doylei 269.97               |
| 1015 | 0        | 94492222.ref  | YP_01305760.1  | bacterioferritin comigratory protein                                    | Oceanobacter sp. RED65                                  |
|      |          | 94428684.gb   | EAT13826.1     | bacterioferritin comigratory protein                                    | Oceanobacter sp. RED65                                  |
| 1016 | 0        | 91775639.ref  | YP_545295.1    | alkyl hydroperoxide reductase/ Thiol specific antioxidant/ Mai allergen | Methylobacillus flagellatus KT                          |
|      |          | 91709526.gb   | ABE49454.1     | alkyl hydroperoxide reductase/ Thiol specific antioxidant/ Mai allergen | Methylobacillus flagellatus KT                          |
| 1017 | 2.40E-13 | 116074603.gb  | EDM27671.1     | putative bacterioferritin comigratory protein                           | Synechococcus sp. RS9916                                |
|      |          | 116067825.gb  | EALU73578.1    | putative bacterioferritin comigratory protein                           | Synechococcus sp. RS9916                                |
| 1018 | 4.45E-15 | 94495758.ref  | YP_013022338.1 | alkyl hydroperoxide reductase/ Thiol specific antioxidant/ Mai allergen | Spinomonas sp. SKA58                                    |
|      |          | 94425146.gb   | EAT10167.1     | alkyl hydroperoxide reductase/ Thiol specific antioxidant/ Mai allergen | Spinomonas sp. SKA58                                    |
| 1019 | 0        | 149197698.ref | YP_01874748.1  | AhpC/TSA family protein                                                 | Lentisphaera araneosa HTCC2155                          |
|      |          | 149139268.gb  | EDM27671.1     | AhpC/TSA family protein                                                 | Lentisphaera araneosa HTCC2155                          |
| 1020 | 2.82E-14 | 196191498.gb  | EBA03283.1     | antioxidant. AhpC/TSA family                                            | Synechococcus sp. PCC 7335                              |
| 1021 | 3.79E-14 | 163793636.ref | YP_0218781.1   | Redoxin                                                                 | alpha proteobacterium BAL199                            |
|      |          | 159181438.gb  | EDP65953.1     | Redoxin                                                                 | alpha proteobacterium BAL199                            |
| 1022 | 2.07E-16 | 169186879.ref | YP_02847040.1  | Peroxioredoxin                                                          | Paenibacillus sp. JDR-2                                 |
|      |          | 169006848.gb  | EDS536398.1    | Peroxioredoxin                                                          | Paenibacillus sp. JDR-2                                 |
| 1023 | 1.09E-12 | 126756328.ref | YP_01742169.1  | alkyl hydroperoxide reductase/ Thiol specific antioxidant/ Mai allergen | Rhodobacteres bacterium HTCC2150                        |
|      |          | 126704191.gb  | EBA03283.1     | alkyl hydroperoxide reductase/ Thiol specific antioxidant/ Mai allergen | Rhodobacteres bacterium HTCC2150                        |
| 1024 | 1.38E-16 | 78779281.ref  | YP_397393.1    | alkyl hydroperoxide reductase/thiol specific antioxidant/ Mai allergen  | Prochlorococcus marinus str. MIT 9312                   |
|      |          | 78712780.gb   | ABB49957.1     | alkyl hydroperoxide reductase/thiol specific antioxidant/ Mai allergen  | Prochlorococcus marinus str. MIT 9312                   |
| 1025 | 3.18E-10 | 71063520.gb   | YP_266239.1    | bacterioferritin comigratory protein                                    | Candidatus Pelagibacter ubique HTCC1082                 |
|      |          | 71062633.gb   | AA221636.1     | bacterioferritin comigratory protein                                    | Candidatus Pelagibacter ubique HTCC1082                 |
| 1026 | 0        | 148259171.ref | YP_001233298.1 | alkyl hydroperoxide reductase/ Thiol specific antioxidant/ Mai allergen | Acidiphilium cryptum JF-5                               |
|      |          | 146400852.gb  | ABO29379.1     | alkyl hydroperoxide reductase/ Thiol specific antioxidant/ Mai allergen | Acidiphilium cryptum JF-5                               |
| 1027 | 0        | 148262476.ref | YP_001229184.1 | alkyl hydroperoxide reductase/ Thiol specific antioxidant/ Mai allergen | Geobacter uranireducens R4                              |
|      |          | 146395978.gb  | ABO24811.1     | alkyl hydroperoxide reductase/ Thiol specific antioxidant/ Mai allergen | Geobacter uranireducens R4                              |
| 1028 | 1.32E-13 | 15689133.ref  | NP_354814.1    | bacterioferritin comigratory protein                                    | Agrobacterium tumefaciens str. C58                      |
|      |          | 86142477.ref  | YP_01060987.1  | bacterioferritin comigratory protein                                    | Agrobacterium tumefaciens str. C58                      |
| 1029 | 0        | 85831229.gb   | EAC49686.1     | bacterioferritin comigratory protein                                    | Leuwenhoekella blandensis MED217                        |
| 1030 | 1.98E-12 | 119193178.ref | XP_001247195.1 | hypothetical protein ClMG_00966                                         | Coccidioides immitis RS                                 |
|      |          | 90305981.gb   | EAS33612.1     | hypothetical protein ClMG_00966                                         | Coccidioides immitis RS                                 |
| 1031 | 4.12E-09 | 162147216.ref | YP_001601677.1 | putative peroxiredoxin                                                  | Gluconacetobacter diazotrophicus PAI 5                  |
|      |          | 209544288.ref | YP_002276497.1 | putative peroxiredoxin                                                  | Gluconacetobacter diazotrophicus PAI 5                  |
|      |          | 161785703.emb | CAP56364.1     | putative peroxiredoxin                                                  | Gluconacetobacter diazotrophicus PAI 5                  |
| 1032 | 0        | 209531945.gb  | ACI51882.1     | alkyl hydroperoxide reductase/ Thiol specific antioxidant/ Mai allergen | Gluconacetobacter diazotrophicus PAI 5                  |
|      |          | 158338534.ref | YP_001519711.1 | bacterioferritin comigratory protein                                    | Acaryochloris marina MBIC11017                          |
|      |          | 158308775.gb  | ABW30392.1     | bacterioferritin comigratory protein                                    | Acaryochloris marina MBIC11017                          |
| 1033 | 1.04E-13 | 184159139.ref | YP_001847478.1 | peroxiredoxin                                                           | Acinetobacter baumannii ACICU                           |
|      |          | 183210733.gb  | ACC5813.1      | Peroxioredoxin                                                          | Acinetobacter baumannii ACICU                           |
| 1034 | 0        | 79589276.ref  | YP_00823001.1  | COG1225: Peroxioredoxin                                                 | Yersinia bercovieri ATCC 43970                          |
| 1035 | 1.26E-10 | 55379892.ref  | YP_137742.1    | bacterioferritin comigratory protein                                    | Haloarcula marismortui ATCC 43049                       |
|      |          | 55232671.gb   | AAV48036.1     | bacterioferritin comigratory protein                                    | Haloarcula marismortui ATCC 43049                       |
| 1036 | 2.49E-13 | 58698387.ref  | YP_00373300.1  | antioxidant. AhpC/Tsa family                                            | Wobachia endosymbiont of Drosophila ananassae           |
|      |          | 58535100.gb   | EAL59186.1     | antioxidant. AhpC/Tsa family                                            | Wobachia endosymbiont of Drosophila ananassae           |
| 1037 | 0        | 29831719.ref  | NP_826353.1    | bacterioferritin comigratory protein                                    | Streptomyces avermitilis MA-4680                        |
|      |          | 29603835.dbj  | BAC72888.1     | putative bacterioferritin comigratory protein                           | Streptomyces avermitilis MA-4680                        |
| 1038 | 3.29E-09 | 84503042.ref  | YP_01001138.1  | AhpC/TSA family protein                                                 | Oceanicola batsensis HTCC2597                           |

|      |                |                |                                                                         |                                                                     |                                          |
|------|----------------|----------------|-------------------------------------------------------------------------|---------------------------------------------------------------------|------------------------------------------|
| 1039 | 84388586 gb    | EAQ01458.1     | AhpC/TSA family protein                                                 | Oceaniicola batsensis HTCC2597                                      | YFPKDDTTPGCTKEAAGGVSVDLQIKKFMNGEN        |
| 1040 | 169190716 ref  | ZP_028506336.1 | alkyl hydroperoxide reductase/ Thiol specific antioxidant/ Mal allergen | Paenibacillus sp. JDR-2                                             | FFYPKDNTPGCTTEATIGVSKDSKHQNFIAKHGdlfad   |
| 1041 | 85375294 ref   | YP_4959596.1   | putative bacterioferritin comigratory protein                           | Erythrobacter ifloralis HTCC2594                                    | YFYPKDDTTPGCTKEACGVSPDSSHKKFKFKEYGtKgjlr |
| 1042 | 84789377 gb    | AB064599.1     | putative bacterioferritin comigratory protein                           | Erythrobacter ifloralis HTCC2594                                    | YFYPKDDTTPGCTKEACGVSPDSSHKKFKFKEYGtKgjlr |
| 1043 | 195953779 gb   | YP_002122069.1 | alkyl hydroperoxide reductase/ Thiol specific antioxidant/ Mal allergen | Hydrogenobaculum sp. Y04AAS1                                        | YFYPKDDTTPGCTKEACGVSPDSSHKKFKFKEYGtKgjlr |
| 1044 | 87125261 ref   | ZP_01081107.1  | alkyl hydroperoxide reductase/ Thiol specific antioxidant/ Mal allergen | Hydrogenobaculum sp. Y04AAS1                                        | YFYPKDDTTPGCTKEACGVSPDSSHKKFKFKEYGtKgjlr |
| 1045 | 86167030 gb    | EA068291.1     | putative bacterioferritin comigratory (BCP) protein                     | Synechococcus sp. RS9917                                            | LOGKKVLfyrpraspogctwaqGVSPDqIKKfmgken    |
| 1046 | 78189562 ref   | YP_379900.1    | putative bacterioferritin comigratory (BCP) protein                     | Synechococcus sp. RS9917                                            | YFYPKDDTTPGCTKEACGVSPDSSHKKFKFKEYGtKgjlr |
| 1047 | 78189562 ref   | YP_379900.1    | bacterioferritin comigratory protein, thiol peroxidase, putative        | Chlorobium chlorochromati CaD3                                      | YFYPKDDTTPGCTKEACGVSPDSSHKKFKFKEYGtKgjlr |
| 1048 | 154175068 ref  | YP_001407532.1 | anti-oxidant AhpC/TSA family protein                                    | Campylobacter curvus 525.92                                         | YFYPKDDTTPGCTKEACGVSPDSSHKKFKFKEYGtKgjlr |
| 1049 | 112603836 gb   | EAU01180.1     | antioxidant AhpC/TSA family                                             | Campylobacter curvus 525.92                                         | YFYPKDDTTPGCTKEACGVSPDSSHKKFKFKEYGtKgjlr |
| 1050 | 89074987 ref   | ZP_01181432.1  | bacterioferritin comigratory protein                                    | Photobacterium sp. SKA34                                            | YFYPKDDTTPGCTKEACGVSPDSSHKKFKFKEYGtKgjlr |
| 1051 | 89049226 gb    | EAR84790.1     | bacterioferritin comigratory protein                                    | Photobacterium sp. SKA34                                            | YFYPKDDTTPGCTKEACGVSPDSSHKKFKFKEYGtKgjlr |
| 1052 | 15642159 ref   | NP_231791.1    | thioredoxin-dependent thiol peroxidase                                  | Vibrio cholerae O1 biovar eltor str. NI 6961                        | YFYPKDDTTPGCTKEACGVSPDSSHKKFKFKEYGtKgjlr |
| 1053 | 121586629 ref  | ZP_01676611.1  | bacterioferritin comigratory protein                                    | Vibrio cholerae 2740-80                                             | YFYPKDDTTPGCTKEACGVSPDSSHKKFKFKEYGtKgjlr |
| 1054 | 153223517 ref  | ZP_01953919.1  | bacterioferritin comigratory protein                                    | Vibrio cholerae MAK 757                                             | YFYPKDDTTPGCTKEACGVSPDSSHKKFKFKEYGtKgjlr |
| 1055 | 153818809 ref  | ZP_01971476.1  | bacterioferritin comigratory protein                                    | Vibrio cholerae NCTC 8457                                           | YFYPKDDTTPGCTKEACGVSPDSSHKKFKFKEYGtKgjlr |
| 1056 | 153822607 ref  | ZP_01975274.1  | bacterioferritin comigratory protein                                    | Vibrio cholerae B33                                                 | YFYPKDDTTPGCTKEACGVSPDSSHKKFKFKEYGtKgjlr |
| 1057 | 9656713 gb     | AAF95305.1     | bacterioferritin comigratory protein                                    | Vibrio cholerae MO10                                                | YFYPKDDTTPGCTKEACGVSPDSSHKKFKFKEYGtKgjlr |
| 1058 | 124118155 gb   | EAY36898.1     | bacterioferritin comigratory protein                                    | Vibrio cholerae OT biovar EI Tor str. NI 6961                       | YFYPKDDTTPGCTKEACGVSPDSSHKKFKFKEYGtKgjlr |
| 1059 | 121548936 gb   | EAX59035.1     | bacterioferritin comigratory protein                                    | Vibrio cholerae 2740-80                                             | YFYPKDDTTPGCTKEACGVSPDSSHKKFKFKEYGtKgjlr |
| 1060 | 1266510652 gb  | EAZ73246.1     | bacterioferritin comigratory protein                                    | Vibrio cholerae MAK 757                                             | YFYPKDDTTPGCTKEACGVSPDSSHKKFKFKEYGtKgjlr |
| 1061 | 1266510652 gb  | EAZ73246.1     | bacterioferritin comigratory protein                                    | Vibrio cholerae NCTC 8457                                           | YFYPKDDTTPGCTKEACGVSPDSSHKKFKFKEYGtKgjlr |
| 1062 | 1266510652 gb  | EAZ73246.1     | bacterioferritin comigratory protein                                    | Vibrio cholerae B33                                                 | YFYPKDDTTPGCTKEACGVSPDSSHKKFKFKEYGtKgjlr |
| 1063 | 2059539594 ref | YP_002227395.1 | hypothetical protein SG2521                                             | Salmoneella enterica subsp. enterica serovar Gallinarum str. 287/91 | YFYPKDDTTPGCTKEACGVSPDSSHKKFKFKEYGtKgjlr |
| 1064 | 205273375 emb  | CAR38347.1     | conserved hypothetical protein                                          | Salmoneella enterica subsp. enterica serovar Gallinarum str. 287/91 | YFYPKDDTTPGCTKEACGVSPDSSHKKFKFKEYGtKgjlr |
| 1065 | 3242984 gb     | AA0238865.1    | merozoit capling protein-1                                              | Plasmodium falciparum                                               | FTYPKAMTTPGCTKEAEGISADSPQKSA TWKRAEKKK   |
| 1066 | 1912130633 ref | XP_002181851.1 | predicted protein                                                       | Phaeoactylum tricornutum CCAP 1055/1                                | YFYPKDDTTPGCTKEAEGISADSPQKSA TWKRAEKKK   |
| 1067 | 2174008452 gb  | EEC46391.1     | predicted protein                                                       | Phaeoactylum tricornutum CCAP 1055/1                                | YFYPKDDTTPGCTKEAEGISADSPQKSA TWKRAEKKK   |
| 1068 | 37680690 ref   | NP_935299.1    | thioredoxin-dependent thiol peroxidase                                  | Vibrio vulnificus YJ016                                             | YFYPKDDTTPGCTKEAEGISADSPQKSA TWKRAEKKK   |
| 1069 | 37199439 dbj   | BAC95270.1     | bacterioferritin comigratory protein                                    | Vibrio vulnificus YJ016                                             | YFYPKDDTTPGCTKEAEGISADSPQKSA TWKRAEKKK   |
| 1070 | 86739625 ref   | YP_480025.1    | bacterioferritin comigratory protein                                    | Vibrio vulnificus YJ016                                             | YFYPKDDTTPGCTKEAEGISADSPQKSA TWKRAEKKK   |
| 1071 | 86656487 gb    | ABD10236.1     | alkyl hydroperoxide reductase/ Thiol specific antioxidant/ Mal allergen | Frankia sp. Ccl3                                                    | YFYPKDDTTPGCTKEAEGISADSPQKSA TWKRAEKKK   |
| 1072 | 1599033398 ref | YP_001650742.1 | alkyl hydroperoxide reductase/ Thiol specific antioxidant/ Mal allergen | Prochlorococcus marinus str. MIT 9211                               | YFYPKDDTTPGCTKEAEGISADSPQKSA TWKRAEKKK   |
| 1073 | 159888574 gb   | ABX08788.1     | alkyl hydroperoxide reductase/ Thiol specific antioxidant/ Mal allergen | Prochlorococcus marinus str. MIT 9211                               | YFYPKDDTTPGCTKEAEGISADSPQKSA TWKRAEKKK   |
| 1074 | 1266989430 ref | YP_001088327.1 | putative thiol peroxidase (bacterioferritin comigratory protein)        | Clostridium difficile 630                                           | YFYPKDDTTPGCTKEAEGISADSPQKSA TWKRAEKKK   |
| 1075 | 145954711 ref  | ZP_01803716.1  | hypothetical protein CbfQ_04002.109                                     | Clostridium difficile 630                                           | YFYPKDDTTPGCTKEAEGISADSPQKSA TWKRAEKKK   |
| 1076 | 168695648 ref  | ZP_02727925.1  | putative thiol peroxidase (bacterioferritin comigratory protein)        | Clostridium difficile 630                                           | YFYPKDDTTPGCTKEAEGISADSPQKSA TWKRAEKKK   |
| 1077 | 168715454 ref  | ZP_02747731.1  | putative thiol peroxidase (bacterioferritin comigratory protein)        | Clostridium difficile 630                                           | YFYPKDDTTPGCTKEAEGISADSPQKSA TWKRAEKKK   |
| 1078 | 168723754 ref  | ZP_02756003.1  | putative thiol peroxidase (bacterioferritin comigratory protein)        | Clostridium difficile 630                                           | YFYPKDDTTPGCTKEAEGISADSPQKSA TWKRAEKKK   |
| 1079 | 168730469 ref  | ZP_02762746.1  | putative thiol peroxidase (bacterioferritin comigratory protein)        | Clostridium difficile 630                                           | YFYPKDDTTPGCTKEAEGISADSPQKSA TWKRAEKKK   |
| 1080 | 196162074 ref  | ZP_031228335.1 | putative thiol peroxidase (bacterioferritin comigratory protein)        | Clostridium difficile 630                                           | YFYPKDDTTPGCTKEAEGISADSPQKSA TWKRAEKKK   |
| 1081 | 1152505067 emb | CAJ68692.1     | putative thiol peroxidase (bacterioferritin comigratory protein)        | Clostridium difficile 630                                           | YFYPKDDTTPGCTKEAEGISADSPQKSA TWKRAEKKK   |
| 1082 | 110801399 ref  | YP_694722.1    | anti-oxidant AhpC/TSA family protein                                    | Clostridium perfringens ATCC 13124                                  | YFYPKDDTTPGCTKEAEGISADSPQKSA TWKRAEKKK   |
| 1083 | 168215168 ref  | ZP_02640793.1  | antioxidant AhpC/TSA family                                             | Clostridium perfringens ATCC 13124                                  | YFYPKDDTTPGCTKEAEGISADSPQKSA TWKRAEKKK   |
| 1084 | 168215168 ref  | ZP_02640793.1  | antioxidant AhpC/TSA family                                             | Clostridium perfringens ATCC 13124                                  | YFYPKDDTTPGCTKEAEGISADSPQKSA TWKRAEKKK   |
| 1085 | 182828806 ref  | ZP_02954544.1  | conserved hypothetical protein                                          | Clostridium perfringens D str. JGS1721                              | YFYPKDDTTPGCTKEAEGISADSPQKSA TWKRAEKKK   |
| 1086 | 110676046 gb   | ABG585033.1    | antioxidant AhpC/TSA family                                             | Clostridium perfringens ATCC 13124                                  | YFYPKDDTTPGCTKEAEGISADSPQKSA TWKRAEKKK   |
| 1087 | 177907852 gb   | ED170450.1     | antioxidant AhpC/TSA family                                             | Clostridium perfringens ATCC 13124                                  | YFYPKDDTTPGCTKEAEGISADSPQKSA TWKRAEKKK   |
| 1088 | 182379727 gb   | ED177206.1     | antioxidant AhpC/TSA family                                             | Clostridium perfringens D str. JGS1721                              | YFYPKDDTTPGCTKEAEGISADSPQKSA TWKRAEKKK   |
| 1089 | 159904051 ref  | YP_001551395.1 | peroxiredoxin                                                           | Clostridium perfringens NCTC 8239                                   | YFYPKDDTTPGCTKEAEGISADSPQKSA TWKRAEKKK   |
| 1090 | 159889227 gb   | ABX09441.1     | Peroxiredoxin                                                           | Prochlorococcus marinus str. MIT 9211                               | YFYPKDDTTPGCTKEAEGISADSPQKSA TWKRAEKKK   |
| 1091 | 177670731 ref  | ZP_02943821.1  | alkyl hydroperoxide reductase/ Thiol specific antioxidant/ Mal allergen | Micrococcus luteus NCTC 2665                                        | YFYPKDDTTPGCTKEAEGISADSPQKSA TWKRAEKKK   |
| 1092 | 172072159 gb   | ED158196.1     | alkyl hydroperoxide reductase/ Thiol specific antioxidant/ Mal allergen | Micrococcus luteus NCTC 2665                                        | YFYPKDDTTPGCTKEAEGISADSPQKSA TWKRAEKKK   |
| 1093 | 182437316 ref  | YP_001826035.1 | hypothetical protein SGR_3523                                           | Streptomyces griseus subsp. griseus NBRC 13350                      | YFYPKDDTTPGCTKEAEGISADSPQKSA TWKRAEKKK   |
| 1094 | 178465882 dbj  | BA020352.1     | conserved hypothetical protein                                          | Streptomyces griseus subsp. griseus NBRC 13350                      | YFYPKDDTTPGCTKEAEGISADSPQKSA TWKRAEKKK   |
| 1095 | 19778913 ref   | YP_002211781.1 | redoxin domain protein                                                  | Oligotropha carboxidovorans OM5                                     | YFYPKDDTTPGCTKEAEGISADSPQKSA TWKRAEKKK   |
| 1096 | 209865120 ref  | YP_002288977.1 | redoxin domain protein                                                  | Oligotropha carboxidovorans OM5                                     | YFYPKDDTTPGCTKEAEGISADSPQKSA TWKRAEKKK   |
| 1097 | 209873316 gb   | AC193112.1     | redoxin domain protein                                                  | Oligotropha carboxidovorans OM5                                     | YFYPKDDTTPGCTKEAEGISADSPQKSA TWKRAEKKK   |
| 1098 | 153009592 ref  | YP_001370807.1 | alkyl hydroperoxide reductase/ Thiol specific antioxidant/ Mal allergen | Ochrobactrum anthropi ATCC 49188                                    | YFYPKDDTTPGCTKEAEGISADSPQKSA TWKRAEKKK   |
| 1099 | 151561480 gb   | ABS14978.1     | alkyl hydroperoxide reductase/ Thiol specific antioxidant/ Mal allergen | Ochrobactrum anthropi ATCC 49188                                    | YFYPKDDTTPGCTKEAEGISADSPQKSA TWKRAEKKK   |
| 1100 | 16087578 ref   | YP_001555097.1 | thioredoxin-dependent thiol peroxidase                                  | Shewanella baltica OS195                                            | YFYPKDDTTPGCTKEAEGISADSPQKSA TWKRAEKKK   |
| 1101 | 160861303 gb   | ABX48937.1     | alkyl hydroperoxide reductase/ Thiol specific antioxidant/ Mal allergen | Shewanella baltica OS195                                            | YFYPKDDTTPGCTKEAEGISADSPQKSA TWKRAEKKK   |
| 1102 | 18313548 ref   | NP_988021.5    | bacterioferritin comigratory protein                                    | Pyrobaculum aerophilum str. IM2                                     | YFYPKDDTTPGCTKEAEGISADSPQKSA TWKRAEKKK   |
| 1103 | 18161030 gb    | AAL64397.1     | bacterioferritin comigratory protein homolog                            | Pyrobaculum aerophilum str. IM2                                     | YFYPKDDTTPGCTKEAEGISADSPQKSA TWKRAEKKK   |
| 1104 | 182412973 ref  | YP_001818039.1 | alkyl hydroperoxide reductase/ Thiol specific antioxidant/ Mal allergen | Opitutus terrae PB90-1                                              | YFYPKDDTTPGCTKEAEGISADSPQKSA TWKRAEKKK   |
| 1105 | 177840187 gb   | ACB74439.1     | alkyl hydroperoxide reductase/ Thiol specific antioxidant/ Mal allergen | Opitutus terrae PB90-1                                              | YFYPKDDTTPGCTKEAEGISADSPQKSA TWKRAEKKK   |
| 1106 | 86605384 ref   | YP_474147.1    | anti-oxidant AhpC/TSA family protein                                    | Synechococcus sp. JA-3-3Ab                                          | YFYPKDDTTPGCTKEAEGISADSPQKSA TWKRAEKKK   |

|      |          |                |                  |                                                                         |                                                      |  |  |  |                                           |
|------|----------|----------------|------------------|-------------------------------------------------------------------------|------------------------------------------------------|--|--|--|-------------------------------------------|
| 1064 | 1.23E-11 | 86553926 gb    | ABC98884.1       | antioxidant, AhpC/Tsa family                                            | Synechococcus sp. JA-3-3Ab                           |  |  |  | KGKAAEKETVasgkkaATFYPKASTPGCTGCTKQAGlsand |
|      |          | 169604064.ref  | XP_00117954563.1 | hypothetical protein SNOG_05041                                         | Phaeosphaeria nodorum SN15                           |  |  |  |                                           |
|      |          | 11066832.gb    | EAT187432.1      | hypothetical protein SNOG_05041                                         | Phaeosphaeria nodorum SN15                           |  |  |  |                                           |
| 1065 | 0        | 149371349.ref  | ZP_018909835.1   | bacterioferritin comigratory protein                                    | unidentified bacterium SCB49                         |  |  |  | FFYPKASTPGCTAEACgvsadfrQKMFKEKYEYdglhik   |
|      |          | 149355487.gb   | EDM44046.1       | bacterioferritin comigratory protein                                    | unidentified bacterium SCB49                         |  |  |  |                                           |
| 1066 | 9.32E-15 | 70726099.ref   | YP_2530113.1     | hypothetical protein SH1098                                             | Staphylococcus haemolyticus JCSC14.35                |  |  |  | YFYPKDDTPTTCITTEACAgvsqdkHQNFIAKHNAmgvrt  |
|      |          | 68446823.dbl   | BAE04407.1       | unnamed protein product                                                 | Staphylococcus haemolyticus JCSC14.35                |  |  |  |                                           |
| 1067 | 4.42E-13 | 83749904.ref   | ZP_00946866.1    | oxaloductase, bacterioferritin co-migratory protein                     | Ralstonia solanaceae UW551                           |  |  |  | YFYPKDDTPTGCTTEAMlglsrdSHENFKAKLEvgliers  |
|      |          | 207743334.ref  | YP_002259726.1   | bacterioferritin comigratory protein                                    | Ralstonia solanaceae IPO1609                         |  |  |  |                                           |
|      |          | 837629426.gb   | EAP70642.1       | oxaloductase, bacterioferritin co-migratory protein                     | Ralstonia solanaceae UW551                           |  |  |  |                                           |
|      |          | 206594731.emb  | CA061658.1       | bacterioferritin comigratory protein                                    | Ralstonia solanaceae IPO1609                         |  |  |  |                                           |
| 1068 | 1.24E-12 | 209527700.ref  | ZP_03276197.1    | alkyl hydroperoxide reductase/ Thiol specific antioxidant/ Mal allergen | Artichopira maxima CS-328                            |  |  |  | YFYPKDDTTPRCTAEACgvsadEHQKfyGKYNlpgrvly   |
|      |          | 209491872.gb   | ED292230.1       | alkyl hydroperoxide reductase/ Thiol specific antioxidant/ Mal allergen | Artichopira maxima CS-328                            |  |  |  |                                           |
| 1069 | 4.73E-12 | 453877316.ref  | ZP_02004179.1    | AhpC/TSA family protein                                                 | Beggiatoa sp. PS                                     |  |  |  | YFYPKDDTTPGCTOEGGGlsrdAMEHEKfoAKYNyrqklr  |
|      |          | 453877316.ref  | EDN65821.1       | AhpC/TSA family protein                                                 | Beggiatoa sp. PS                                     |  |  |  |                                           |
| 1070 | 2.89E-15 | 110833635.ref  | YP_692494.1      | AhpC/TSA family protein                                                 | Alcanivorax borkumensis SK2                          |  |  |  | FFYPKALTPGCTTQACglsprLRFKFDIKHfmgllrt     |
|      |          | 110646746.emb  | CAL16222.1       | AhpC/TSA family protein                                                 | Alcanivorax borkumensis SK2                          |  |  |  |                                           |
| 1071 | 0        | 156844281.ref  | XP_001645204.1   | hypothetical protein Kpol_1062p57                                       | Vanderwallozyma polyspora DSM 70294                  |  |  |  | FAYPRAMTPGCTRQACglsadSOKKFQDKYsqgllirs    |
|      |          | 156115862.gb   | ED017346.1       | hypothetical protein Kpol_1062p57                                       | Vanderwallozyma polyspora DSM 70294                  |  |  |  |                                           |
| 1072 | 0        | 494801338.ref  | YP_034797.1      | bacterioferritin comigratory protein                                    | Bacillus thuringiensis serovar konkukkian str. 97-27 |  |  |  | YFYPKDDTTPGCTTTEACvsylfqrkdlGVSPDymglirs  |
|      |          | 49331694.gb    | AA1162340.1      | bacterioferritin comigratory protein                                    | Bacillus thuringiensis serovar konkukkian str. 97-27 |  |  |  |                                           |
| 1073 | 0        | 90414072.ref   | ZP_01222055.1    | bacterioferritin comigratory protein                                    | Photobacterium profundum 3TCK                        |  |  |  | YFYPKAMTPGCTVQACglsrdLPRFIEIRDndyghlri    |
|      |          | 90324867.gb    | EAS41395.1       | bacterioferritin comigratory protein                                    | Photobacterium profundum 3TCK                        |  |  |  |                                           |
| 1074 | 1.77E-11 | 197103299.ref  | YP_002130676.1   | bacterioferritin comigratory protein                                    | Phenylbacterium zucineum HL K1                       |  |  |  | YFYPKDDTTPGCTRQACglsrdSHEKFAAKHGmgldirs   |
|      |          | 196478719.gb   | AC678247.1       | bacterioferritin comigratory protein                                    | Phenylbacterium zucineum HL K1                       |  |  |  |                                           |
| 1075 | 3.26E-11 | 167586997.ref  | ZP_02379385.1    | alkyl hydroperoxide reductase/ Thiol specific antioxidant/ Mal allergen | Burkholderia ubonenis Bu                             |  |  |  | YFYPKDDTTPGCTTEGLgvsrdSHDNFKAKLEvgliers   |
|      |          | 197116621.ref  | YP_002137048.1   | alkyl hydroperoxide reductase/ Thiol specific antioxidant/ Mal allergen | Burkholderia ubonenis Bu                             |  |  |  | FFYPKDDTTPGCTAEAVslshakisaTIGSIRSRvspsd   |
| 1076 | 4.06E-13 | 197085981.gb   | ACH37252.1       | alkyl hydroperoxide reductase/ Thiol specific antioxidant/ Mal allergen | Geobacter bemidjensis Bem                            |  |  |  |                                           |
| 1077 | 4.23E-10 | 126728571.ref  | ZP_01744392.1    | alkyl hydroperoxide reductase/ Thiol specific antioxidant/ Mal allergen | Geobacter bemidjensis Bem                            |  |  |  | FFYPKDDTTPGCTKEENglsrdSHEKFMKKKSfmgliers  |
|      |          | 126710507.gb   | EBA09558.1       | alkyl hydroperoxide reductase/ Thiol specific antioxidant/ Mal allergen | Sacittula stellata E-37                              |  |  |  |                                           |
| 1078 | 1.74E-12 | 213405903.ref  | XP_002173723.1   | peroxiredoxin DO15                                                      | Schizosaccharomyces japonicus yFS275                 |  |  |  | LRKIQIDlaypkantpctkqggGVSYDacknktkqn      |
|      |          | 212001770.gb   | EEB07430.1       | peroxiredoxin DO15                                                      | Schizosaccharomyces japonicus yFS275                 |  |  |  |                                           |
| 1079 | 5.80E-11 | 194556835.ref  | YP_002091881.1   | alkyl hydroperoxide reductase                                           | Burkholderia cenocepacia PC184                       |  |  |  | YFYPAAFTKGCTTEAfgvsadLTKFSVSECRlpaldira   |
|      |          | 124870626.gb   | EAY762342.1      | alkyl hydroperoxide reductase                                           | Burkholderia cenocepacia PC184                       |  |  |  |                                           |
| 1080 | 3.07E-10 | 91762061.ref   | ZP_01284026.1    | bacterioferritin comigratory protein                                    | Candidatus Pelagibacter ubique HTCC1002              |  |  |  | IDGELYSyvykddfpqgclainGISKDSlnhkkkafk     |
|      |          | 91717863.gb    | EAS84513.1       | bacterioferritin comigratory protein                                    | Candidatus Pelagibacter ubique HTCC1002              |  |  |  |                                           |
| 1081 | 4.75E-11 | 774575999.ref  | YP_347701.1      | alkyl hydroperoxide reductase/ Thiol specific antioxidant/ Mal allergen | Pseudomonas fluorescens Pf0-1                        |  |  |  | SLSALKGGQVlypkddtpgctkqccGVSDshkkkvtkfk   |
|      |          | 77381599.gb    | ABA73112.1       | alkyl hydroperoxide reductase/ Thiol specific antioxidant/ Mal allergen | Pseudomonas fluorescens Pf0-1                        |  |  |  |                                           |
| 1082 | 4.81E-10 | 70728834.ref   | YP_2568563.1     | AhpC/TSA family protein                                                 | Pseudomonas fluorescens Pf-5                         |  |  |  | YFYPKDDTTPGCTTEGGQgvsrdKLLKLYGKEYkdglvq   |
|      |          | 68343133.gb    | AA790739.1       | AhpC/TSA family protein                                                 | Pseudomonas fluorescens Pf-5                         |  |  |  |                                           |
| 1083 | 4.03E-19 | 85544451.pdb   | 2CX3             | A Chain A, Crystall Structure Of A Bacterioferritin Comigratory Protein | Aeropyrum Permx K1                                   |  |  |  | IFFPAAAFSPVCTKELCaisvdGLKKFKDENRlqkiva    |
|      |          | 85544452.pdb   | 2CX3             | B Chain B, Crystall Structure Of A Bacterioferritin Comigratory Protein | Aeropyrum Permx K2                                   |  |  |  |                                           |
|      |          | 85544453.pdb   | 2CX3             | C Chain C, Crystall Structure Of A Bacterioferritin Comigratory Protein | Aeropyrum Permx K3                                   |  |  |  |                                           |
|      |          | 85544454.pdb   | 2CX3             | D Chain D, Crystall Structure Of A Bacterioferritin Comigratory Protein | Aeropyrum Permx K4                                   |  |  |  |                                           |
|      |          | 85544455.pdb   | 2CX4             | A Chain A, Crystall Structure Of A Bacterioferritin Comigratory Protein | Aeropyrum Permx K5                                   |  |  |  |                                           |
|      |          | 85544456.pdb   | 2CX4             | B Chain B, Crystall Structure Of A Bacterioferritin Comigratory Protein | Aeropyrum Permx K6                                   |  |  |  |                                           |
|      |          | 85544457.pdb   | 2CX4             | C Chain C, Crystall Structure Of A Bacterioferritin Comigratory Protein | Aeropyrum Permx K7                                   |  |  |  |                                           |
|      |          | 85544458.pdb   | 2CX4             | D Chain D, Crystall Structure Of A Bacterioferritin Comigratory Protein | Aeropyrum Permx K8                                   |  |  |  |                                           |
|      |          | 85544459.pdb   | 2CX4             | E Chain E, Crystall Structure Of A Bacterioferritin Comigratory Protein | Aeropyrum Permx K9                                   |  |  |  |                                           |
|      |          | 85544460.pdb   | 2CX4             | F Chain F, Crystall Structure Of A Bacterioferritin Comigratory Protein | Aeropyrum Permx K10                                  |  |  |  |                                           |
|      |          | 85544461.pdb   | 2CX4             | G Chain G, Crystall Structure Of A Bacterioferritin Comigratory Protein | Aeropyrum Permx K11                                  |  |  |  |                                           |
|      |          | 85544462.pdb   | 2CX4             | H Chain H, Crystall Structure Of A Bacterioferritin Comigratory Protein | Aeropyrum Permx K12                                  |  |  |  |                                           |
| 1084 | 0        | 186458539.ref  | ZP_02968847.1    | alkyl hydroperoxide reductase/ Thiol specific antioxidant/ Mal allergen | bacterium Ellin514                                   |  |  |  | TNGGGRlylypkddtpgctkqccGVSDshkkkvtkfk     |
|      |          | 184204777.gb   | EDU01828.1       | alkyl hydroperoxide reductase/ Thiol specific antioxidant/ Mal allergen | bacterium Ellin514                                   |  |  |  |                                           |
| 1085 | 2.48E-11 | 157907381.ref  | NP_280562.1      | HvYA                                                                    | Halobacterium sp. NRC-1                              |  |  |  | GWGSERLIlypdlfslpvcateicGISPDatheatadeya  |
|      |          | 10581280.gb    | AA630042.1       | monoxygenase                                                            | Halobacterium sp. NRC-1                              |  |  |  |                                           |
| 1086 | 1.01E-11 | 197624629.pdb  | EDY37188.1       | alkyl hydroperoxide reductase/ Thiol specific antioxidant/ Mal allergen | Cyanobium sp. PCC 7001                               |  |  |  | RPAAARAlypdlfslpvcateicGVSDshhseicqseq    |
|      |          | 121727192.ref  | ZP_01680359.1    | bacterioferritin comigratory protein                                    | Cyanobium sp. PCC 7001                               |  |  |  | YFYPKAMTPGCTVQACgvsdfrLGNFKFIERDNfghlri   |
| 1087 | 0        | 153213291.ref  | ZP_01948703.1    | bacterioferritin comigratory protein                                    | Vibrio cholerae V52                                  |  |  |  |                                           |
|      |          | 153801654.ref  | ZP_01956240.1    | bacterioferritin comigratory protein                                    | Vibrio cholerae MZO-3                                |  |  |  |                                           |
|      |          | 153825560.ref  | ZP_01978227.1    | bacterioferritin comigratory protein                                    | Vibrio cholerae MZO-2                                |  |  |  |                                           |
|      |          | 153828623.ref  | ZP_01981290.1    | bacterioferritin comigratory protein                                    | Vibrio cholerae 623-39                               |  |  |  |                                           |
|      |          | 197751298.ref  | YP_002174709.1   | bacterioferritin comigratory protein                                    | Vibrio cholerae AM-19226                             |  |  |  |                                           |
|      |          | 121630437.gb   | EAX62830.1       | bacterioferritin comigratory protein                                    | Vibrio cholerae V52                                  |  |  |  |                                           |
|      |          | 124116091.ref  | EAT34911.1       | bacterioferritin comigratory protein                                    | Vibrio cholerae V587                                 |  |  |  |                                           |
|      |          | 124122831.gb   | EY41574.1        | bacterioferritin comigratory protein                                    | Vibrio cholerae MZO-3                                |  |  |  |                                           |
|      |          | 125620563.gb   | EAZ48949.1       | bacterioferritin comigratory protein                                    | Vibrio cholerae V51                                  |  |  |  |                                           |
|      |          | 148875894.gb   | EDL74029.1       | bacterioferritin comigratory protein                                    | Vibrio cholerae 623-39                               |  |  |  |                                           |
|      |          | 149740711.gb   | EDM54810.1       | bacterioferritin comigratory protein                                    | Vibrio cholerae MZO-2                                |  |  |  |                                           |
|      |          | 150422723.gb   | EDN14677.1       | bacterioferritin comigratory protein                                    | Vibrio cholerae AM-19226                             |  |  |  |                                           |
| 1088 | 0        | 1588315466.ref | YP_001507974.1   | alkyl hydroperoxide reductase/ Thiol specific antioxidant/ Mal allergen | Frankia sp. EAN1tpcc                                 |  |  |  | FFYPAAAMTPGCTRESGvsadKQAEFSAKHswards      |

|      |          |                |                |                |                                                                                   |                                                   |  |  |                                             |
|------|----------|----------------|----------------|----------------|-----------------------------------------------------------------------------------|---------------------------------------------------|--|--|---------------------------------------------|
| 1089 | 4.42E-15 | 1512271967 ref | YP_001332789.1 | ABM13068.1     | alkyl hydroperoxide reductase/ Thiol specific antioxidant/ Mal allergen           | Frankia sp. EAM1pec                               |  |  | LKGGKAYVYKNDPTGCTEACGVSISGDHDMQFIEKIQ       |
| 1090 | 5.93E-11 | 450374767 dbj  | BAE60327.1     | BAE60327.1     | bacterioferitin comigratory protein                                               | Staphylococcus aureus subsp. aureus str. Newman   |  |  | FFYPKDDTPGCTSESQGISRSHDKFRGKYDVGILRS        |
| 1091 | 1.89E-11 | 30180371 emb   | CAD84683.1     | CAD84683.1     | bacterioferitin comigratory protein                                               | Nitrosomonas europaea ATCC 19718                  |  |  | TLSAQYVYKNDPTGCTEACGVSISGDHDMQFIEKIQ        |
| 1092 | 6.84E-11 | 214044200 gb   | EEB84838.1     | AB841380.2     | alkyl hydroperoxide reductase/ Thiol specific antioxidant/ Mal allergen           | Thiomicrospira crunogena XCL-2                    |  |  | YFYPRDDTPGCTKEISGISRDKHDKFKTAKHDSMGLERA     |
| 1093 | 9.95E-14 | 88002278 ref   | YP_5065599.1   | YP_5065599.1   | redoxin                                                                           | Rhizobium lotum strain 102                        |  |  | SLQDFLQKAGYVYKNDPTGCTEACGVSISGDHDMQFIEKIQ   |
| 1094 | 0        | 869628606 gb   | ABD046915.1    | YP_001702255.1 | bacterioferitin comigratory protein                                               | Neorickettsia sennetsu str. Miyayama              |  |  | YFYPAAMTPGCTKQACGVSISGDHDMQFIEKIQ           |
| 1095 | 0        | 1673395 emb    | CA804798.1     | CA804798.1     | hypothetical 9.1 kd protein                                                       | Mycobacterium abscessus                           |  |  | ELKGDKISYKQVYVYKNDPTGCTEACGVSISGDHDMQFIEKIQ |
| 1096 | 0        | 147674356 ref  | YP_001217679.1 | YP_001217679.1 | thioredoxin-dependent thiol peroxidase                                            | Bacillus subtilis                                 |  |  | YFYPKAMTPGCTVQACGVSISGDHDMQFIEKIQ           |
| 1097 | 0        | 146300195 ref  | YP_001194786.1 | YP_001194786.1 | bacterioferitin comigratory protein                                               | Vibrio cholerae O395                              |  |  | FFYPKASTPGCTEACGVSISGDHDMQFIEKIQ            |
| 1098 | 0        | 213629346 gb   | ABO05467.1     | ABO05467.1     | alkyl hydroperoxide reductase/ Thiol specific antioxidant/ Mal allergen           | Flavobacterium johnsoniae UW101                   |  |  | FFYPAAMTPGCTEACGVSISGDHDMQFIEKIQ            |
| 1099 | 3.00E-11 | 171317827 ref  | YP_02907008.1  | YP_02907008.1  | alkyl hydroperoxide reductase/ Thiol specific antioxidant/ Mal allergen           | Bifidobacterium longum subsp. infantis ATCC 15697 |  |  | YFYPAAMTPGCTEACGVSISGDHDMQFIEKIQ            |
| 1100 | 1.22E-10 | 26987970 ref   | NP_743395.1    | NP_743395.1    | alkyl hydroperoxide reductase/ Thiol specific antioxidant/ Mal allergen           | Burkholderia ambifaria MEX-5                      |  |  | YFYPAAMTPGCTEACGVSISGDHDMQFIEKIQ            |
| 1101 | 1.67E-16 | 116063062 dbj  | BAAR1136.2     | BAAR1136.2     | thiol peroxidase                                                                  | Aeropyrum pernix K1                               |  |  | IFFPAAFSVCTKELCEAISVDSCLKKFKDENRIVKPD       |
| 1102 | 3.58E-12 | 91775334 ref   | YP_544946.1    | YP_544946.1    | alkyl hydroperoxide reductase/ Thiol specific antioxidant/ Mal allergen           | Methylobacillus flagellatus K1                    |  |  | YFYPKDNTTPSCTLQAGISRSDFATFRDKFKHGMKIVRS     |
| 1103 | 0        | 108760609 ref  | YP_634742.1    | YP_634742.1    | alkyl hydroperoxide reductase/ Thiol specific antioxidant/ Mal allergen           | Methylobacillus flagellatus K1                    |  |  | YFYPKDNTTPGCTEACGVSISGDHDMQFIEKIQ           |
| 1104 | 0        | 118474406 ref  | YP_891513.1    | YP_891513.1    | anti-oxidant AhpC/TSA family protein                                              | Campylobacter fetus subsp. fetus 82-40            |  |  | YFYPKDNTTPGCTEACGVSISGDHDMQFIEKIQ           |
| 1105 | 1.35E-11 | 116222700 ref  | YP_824956.1    | YP_824956.1    | antioxidant. AhpC/Tsa family                                                      | Solibacter ustulatus Elin6076                     |  |  | LGARIAVYVYKNDPTGCTEACGVSISGDHDMQFIEKIQ      |
| 1106 | 0        | 91223520 ref   | YP_01258785.1  | YP_01258785.1  | redoxin domain-containing protein                                                 | Redoxin domain protein                            |  |  | SLEDFKGGKYYVYKNDPTGCTEACGVSISGDHDMQFIEKIQ   |
| 1107 | 6.15E-10 | 162454243 ref  | YP_001616610.1 | YP_001616610.1 | bacterioferitin comigratory protein                                               | Vibrio alginolyticus 12G01                        |  |  | YFYPKDNTTPGCTEACGVSISGDHDMQFIEKIQ           |
| 1108 | 0        | 162439437 ref  | YP_001826156.1 | YP_001826156.1 | hypothetical protein SGR_4644                                                     | Sorangium cellulosum 'So ce 56'                   |  |  | YFYPAALTPGCTKQACGVSISGDHDMQFIEKIQ           |
| 1109 | 0        | 178466953 dbj  | BAQ21473.1     | BAQ21473.1     | conserved hypothetical protein                                                    | Streptomyces griseus subsp. griseus NBRC 13350    |  |  | YFYPAALTPGCTKQACGVSISGDHDMQFIEKIQ           |
| 1110 | 0        | 189500619 ref  | YP_001960089.1 | YP_001960089.1 | alkyl hydroperoxide reductase/ Thiol specific antioxidant/ Mal allergen           | Chlorobium phaeoacetoides BS1                     |  |  | YFYPKDDTPGCTEACGVSISGDHDMQFIEKIQ            |
| 1111 | 5.02E-10 | 209574008 gb   | ACIE62942.1    | ACIE62942.1    | alkyl hydroperoxide reductase/ Thiol specific antioxidant/ Mal allergen           | Chlorobium phaeoacetoides BS1                     |  |  | YFYPKDDTPGCTEACGVSISGDHDMQFIEKIQ            |
| 1112 | 0        | 157961801 ref  | YP_001501835.1 | YP_001501835.1 | peroxide AhpC-Tsa family protein                                                  | Acidithiobacillus thiooxidans                     |  |  | LNGKIWVYVYKNDPTGCTEACGVSISGDHDMQFIEKIQ      |
| 1113 | 0        | 157163950 ref  | YP_001467570.1 | YP_001467570.1 | alkyl hydroperoxide reductase/ Thiol specific antioxidant/ Mal allergen           | Shewanella pealeana ATCC 700345                   |  |  | YFYPKASTPGCTVQACGVSISGDHDMQFIEKIQ           |
| 1114 | 0        | 112801129 gb   | EAI198473.1    | EAI198473.1    | anti-oxidant AhpC/TSA family protein                                              | Shewanella pealeana ATCC 700345                   |  |  | YFYPKDNTTPGCTEACGVSISGDHDMQFIEKIQ           |
| 1115 | 7.64E-13 | 86167790 gb    | EAQ69048.1     | EAQ69048.1     | putative peroxide bcp (Thioredoxin reductase/Bacterioferitin comigratory protein) | Campylobacter concisus 13826                      |  |  | FFYPKDNTTPGCTEACGVSISGDHDMQFIEKIQ           |
| 1116 | 1.51E-09 | 193214342 ref  | YP_001995541.1 | YP_001995541.1 | putative bacterioferitin comigratory protein                                      | Synechococcus sp. RS9917                          |  |  | YFYPKDNTTPGCTEACGVSISGDHDMQFIEKIQ           |
| 1117 | 0        | 172058523 gb   | ACF13094.1     | ACF13094.1     | putative bacterioferitin comigratory protein                                      | Synechococcus sp. RS9917                          |  |  | YFYPKDNTTPGCTEACGVSISGDHDMQFIEKIQ           |
| 1118 | 1.89E-10 | 171991044 gb   | ACB61966.1     | YP_001814983.1 | bacterioferitin comigratory protein                                               | Acinetobacter sp. ADP1                            |  |  | YFYPKDNTTPGCTEACGVSISGDHDMQFIEKIQ           |
| 1119 | 0        | 193085388 gb   | ACF10664.1     | YP_001937864.1 | alkyl hydroperoxide reductase/ Thiol specific antioxidant/ Mal allergen           | Exiguobacterium sibiricum 255-15                  |  |  | YFYPKDNTTPGCTEACGVSISGDHDMQFIEKIQ           |
| 1120 | 4.13E-14 | 145256409 ref  | XP_001401375.1 | XP_001401375.1 | PRXQ_POPJC RecName: Full=Peroxide bcp Q. chloroplast; AlNA                        | Chlorocaulum parvum NCIB 8327                     |  |  | YFYPKDNTTPGCTEACGVSISGDHDMQFIEKIQ           |
| 1121 | 3.75E-10 | 15298487 ref   | YP_001349741.1 | YP_001349741.1 | peroxide bcp Q                                                                    | Populus trichocarpa x Populus deltoides           |  |  | YFYPKDNTTPGCTEACGVSISGDHDMQFIEKIQ           |
| 1122 | 6.83E-14 | 150959975 gb   | ABR82000.1     | ABR82000.1     | peroxide bcp Q                                                                    | Populus trichocarpa x Populus deltoides           |  |  | YFYPKDNTTPGCTEACGVSISGDHDMQFIEKIQ           |

|      |          |           |     |                |                                                                         |  |                                          |                                         |
|------|----------|-----------|-----|----------------|-------------------------------------------------------------------------|--|------------------------------------------|-----------------------------------------|
| 1123 | 7.23E-17 | 118046201 | ref | ZP_01514854.1  | Redoxin                                                                 |  | Chloroflexus aggregans DSM 9485          | YFYPKDDTTPGCTSQACgspdxSHTKFKTKHNymgIirs |
|      |          | 117997366 | gb  | EAV11554.1     | Redoxin                                                                 |  | Chloroflexus aggregans DSM 9485          |                                         |
|      |          | 219543203 | gb  | ACL24941.1     | alkyl hydroperoxide reductase/ Thiol specific antioxidant/ Mal allergen |  | Chloroflexus aggregans DSM 9485          |                                         |
| 1124 | 0        | 209363960 | ref | YP_001424466.2 | thioredoxin peroxidase                                                  |  | Coxiella burnetii Dugway 5J108-111       | LKGKKVlyfypkddlpgcckeaGISKDahqsfkqkyn   |
|      |          | 212219469 | ref | YP_002305256.1 | thioredoxin peroxidase                                                  |  | Coxiella burnetii CbuK_Q154              |                                         |
|      |          | 207081893 | gb  | ABS78051.2     | thioredoxin peroxidase                                                  |  | Coxiella burnetii Dugway 5J108-111       |                                         |
|      |          | 212012731 | gb  | ACJ20111.1     | thioredoxin peroxidase                                                  |  | Coxiella burnetii CbuK_Q154              |                                         |
| 1125 | 6.32E-15 | 149187306 | ref | ZP_01865604.1  | bacterioferritin comigratory protein                                    |  | Vibrio shilonii AK1                      | LOGKKVLlyfyraspgcvtvaqGLSPDKlnlnfkqe    |
|      |          | 149188977 | ref | ZP_01867266.1  | bacterioferritin comigratory protein                                    |  | Vibrio shilonii AK1                      |                                         |
|      |          | 149189172 | ref | ZP_01867400.1  | bacterioferritin comigratory protein                                    |  | Vibrio shilonii AK1                      |                                         |
|      |          | 149190279 | ref | ZP_01868553.1  | bacterioferritin comigratory protein                                    |  | Vibrio shilonii AK1                      |                                         |
|      |          | 148835886 | gb  | EDL52849.1     | bacterioferritin comigratory protein                                    |  | Vibrio shilonii AK1                      |                                         |
|      |          | 148837075 | gb  | EDL54024.1     | bacterioferritin comigratory protein                                    |  | Vibrio shilonii AK1                      |                                         |
|      |          | 148837163 | gb  | EDL54111.1     | bacterioferritin comigratory protein                                    |  | Vibrio shilonii AK1                      |                                         |
|      |          | 148838842 | gb  | EDL55781.1     | bacterioferritin comigratory protein                                    |  | Vibrio shilonii AK1                      |                                         |
| 1126 | 0        | 14600604  | ref | NP_14712.1     | truncated thiol peroxidase                                              |  | Aeropyrum permix K1                      | GRSVVyhpkalfpgcraeiPPGRNRRAfksfvgaaq    |
|      |          | 5103930   | dbj | BAA79246.1     | truncated thiol peroxidase                                              |  | Aeropyrum permix K1                      |                                         |
| 1127 | 0        | 215919074 | ref | NP_819971.2    | antioxidant, AhpC/TSA family                                            |  | Coxiella burnetii RSA 493                | LKGKKVlyfypkddlpgcckeaGISKDahqsfkqkyn   |
|      |          | 206583959 | gb  | AAQ910485.2    | thioredoxin peroxidase                                                  |  | Coxiella burnetii RSA 493                |                                         |
| 1128 | 4.25E-09 | 71907981  | ref | YP_285568.1    | Alkyl hydroperoxide reductase/ Thiol specific antioxidant/ Mal allergen |  | Dechloromonas aromatica RCB              | FSLPDIffypkdgtpcctkevllLGISRDkhaefrdkeg |
|      |          | 71847602  | gb  | AAZ47098.1     | Alkyl hydroperoxide reductase/ Thiol specific antioxidant/ Mal allergen |  | Dechloromonas aromatica RCB              |                                         |
| 1129 | 0        | 188569826 | ref | YP_001922441.1 | putative peroxiredoxin bcp                                              |  | Clostridium botulinum E3 str. Alaska E43 | YFYPKDNTPGCTTEACglskdsHhNKfISKFNvlgiers |
|      |          | 188500107 | gb  | ACD53243.1     | putative peroxiredoxin bcp                                              |  | Clostridium botulinum E3 str. Alaska E43 |                                         |
| 1130 | 0        | 300187231 | ref | NP_830354.1    | thioredoxin-dependent thiol peroxidase                                  |  | Bacillus cereus ATCC 14579               | YFYPKDMTPGCTTEACgyspdRHLKfIEKHvymgiers  |
|      |          | 29894284  | gb  | AAI07565.1     | thioredoxin-dependent thiol peroxidase                                  |  | Bacillus cereus ATCC 14579               |                                         |

Total Number of Results: 1130

| Hit # | p-value  | gi number | db  | protein accession | Name                                                       | Species                                                                              | Crosshits [subfamily (p-value)] | AhpC/Prx1 subgroup | Active Site Signature                        |
|-------|----------|-----------|-----|-------------------|------------------------------------------------------------|--------------------------------------------------------------------------------------|---------------------------------|--------------------|----------------------------------------------|
| 1     |          | 67159414  | ref | ZP_00419975.1     | Alkyl hydroperoxide reductase [Thiol specific antioxidant] | <i>Azotobacter vinelandii</i> AvOP                                                   |                                 | group 2            | FFYPADFTFVCPTEVSTTHKAWHDSSESGLAEREGEGLTK     |
| 2     | 1.72E-17 | 87084178  | gb  | EA036370.1        | Alkyl hydroperoxide reductase [Thiol specific antioxidant] | <i>Azotobacter vinelandii</i> AvOP                                                   |                                 | group 2            | VFYPADFTFVCPTEFKAALGVSTTHKAWHDHDTSEVMITGLDRG |
| 3     |          | 125714691 | gb  | ABN53183.1        | Alkyl hydroperoxide reductase [Thiol specific antioxidant] | <i>Clostridium thermocoelum</i> ATCC 27405                                           |                                 | group 2            | FFYPADFTFVCPTEVSTTHKAWHSSSEEGADRAAEGIGVKG    |
|       |          | 16759365  | ref | NP_451184.1       | Alkyl hydroperoxide reductase subunit C                    | <i>Salmonella typhimurium</i> LT2                                                    |                                 |                    |                                              |
|       |          | 29142680  | ref | NP_806002.1       | Alkyl hydroperoxide reductase subunit C                    | <i>Salmonella enterica</i> subsp. <i>enterica</i> serovar Typhi str. CT18            |                                 |                    |                                              |
|       |          | 56414255  | ref | YP_151330.1       | Alkyl hydroperoxide reductase subunit C                    | <i>Salmonella enterica</i> subsp. <i>enterica</i> serovar Typhi Ty2                  |                                 |                    |                                              |
|       |          | 62179209  | ref | YP_2156626.1      | Alkyl hydroperoxide reductase subunit C                    | <i>Salmonella enterica</i> subsp. <i>enterica</i> serovar Choleraesuis str. SC-B67   |                                 |                    |                                              |
|       |          | 161504221 | ref | YP_001571333.1    | hypothetical protein SARI_02928                            | <i>Salmonella enterica</i> subsp. <i>enterica</i> serovar Paratyphi A str. ATCC 9150 |                                 |                    |                                              |
|       |          | 161615186 | ref | YP_001569151.1    | hypothetical protein SPAB_02954                            | <i>Salmonella enterica</i> subsp. <i>enterica</i> serovar Paratyphi B str. SPB7      |                                 |                    |                                              |
|       |          | 61218500  | sp  | P0A251            | AHP_C                                                      | <i>Salmonella typhimurium</i> LT2                                                    |                                 |                    |                                              |
|       |          | 61218501  | sp  | P0A252            | AHP_C                                                      | <i>Salmonella typhi</i>                                                              |                                 |                    |                                              |
|       |          | 25285290  | pir | gi                | AB0577                                                     | <i>Salmonella enterica</i> subsp. <i>enterica</i> serovar Typhi (strain CT18)        |                                 |                    |                                              |
|       |          | 4571171   | gb  | AAA16431.1        | Alkyl hydroperoxide reductase                              | <i>Salmonella typhimurium</i>                                                        |                                 |                    |                                              |
|       |          | 16419119  | gb  | AAL19559.1        | Alkyl hydroperoxide reductase, C22 subunit                 | <i>Salmonella typhimurium</i> LT2                                                    |                                 |                    |                                              |
|       |          | 16501859  | emb | CAD05084.1        | Alkyl hydroperoxide reductase c22 protein                  | <i>Salmonella enterica</i> subsp. <i>enterica</i> serovar Typhi                      |                                 |                    |                                              |
|       |          | 29138291  | gb  | AAO98662.1        | Alkyl hydroperoxide reductase c22 protein                  | <i>Salmonella enterica</i> subsp. <i>enterica</i> serovar Typhi Ty2                  |                                 |                    |                                              |
|       |          | 56128512  | gb  | AAV78018.1        | Alkyl hydroperoxide reductase c22 protein                  | <i>Salmonella enterica</i> subsp. <i>enterica</i> serovar Paratyphi A str. ATCC 9150 |                                 |                    |                                              |
|       |          | 62126842  | ref | AAAG4545.1        | Alkyl hydroperoxide reductase, C22 subunit; detoxification | <i>Salmonella enterica</i> subsp. <i>enterica</i> serovar Choleraesuis str. SC-B67   |                                 |                    |                                              |
|       |          | 160365688 | gb  | ABX22191.1        | hypothetical protein SARI_02328                            | <i>Salmonella enterica</i> subsp. <i>enterica</i> serovar 62:z4:z23:--               |                                 |                    |                                              |
|       |          | 161364550 | gb  | ABX68316.1        | hypothetical protein SPAB_02954                            | <i>Salmonella enterica</i> subsp. <i>enterica</i> serovar Paratyphi B str. SPB7      |                                 |                    |                                              |
| 4     |          | 51829204  | ref | YP_074755.1       | 2-cys peroxiredoxin                                        | <i>Symbiobacterium thermophilum</i> IAM_14863                                        |                                 | group 1            | FFYPADFTFVCPTEVSVSHRAWIKTPKEGGGLGVLEIGVALRG  |
|       |          | 51855753  | tbl | BAD39911.1        | 2-cys peroxiredoxin                                        | <i>Symbiobacterium thermophilum</i> IAM_14863                                        |                                 |                    |                                              |
| 5     |          | 145621190 | tbl | ZP_01777180.1     | Alkyl hydroperoxide reductase [Thiol specific antioxidant] | <i>Geobacter bemiidensis</i> Bem                                                     |                                 | group 1            | VTKFFYPLDFTFVCPSEVSVTHLAWKNTSVNGGIGESVALRG   |
|       |          | 144942508 | gb  | EDJ77643.1        | Alkyl hydroperoxide reductase [Thiol specific antioxidant] | <i>Geobacter bemiidensis</i> Bem                                                     |                                 |                    |                                              |
| 6     |          | 126664476 | ref | ZP_01735460.1     | Alkyl hydroperoxide reductase c22 protein                  | <i>Mairrobacter</i> sp. ELB17                                                        |                                 | group 2            | FFYPADFTFVCPTEVSTTHKAWHDSSESQGLADRAAEGVGVKG  |
|       |          | 126630802 | gb  | ERA01416.1        | Alkyl hydroperoxide reductase c22 protein                  | <i>Mairrobacter</i> sp. ELB17                                                        |                                 |                    |                                              |
| 7     |          | 145350122 | tbl | XP_001419466.1    | predicted protein                                          | <i>Ostreococcus lucimarinus</i> CCE5901                                              |                                 | group 1            | FFYPLDFTFVCPTEVLGVDSHSLAWLQTDRRDGGGLDGTALRG  |
|       |          | 144579698 | gb  | ABO97759.1        | predicted protein                                          | <i>Ostreococcus lucimarinus</i> CCE5901                                              |                                 |                    |                                              |
| 8     |          | 120556743 | ref | YP_961094.1       | Alkyl hydroperoxide reductase [Thiol specific antioxidant] | <i>Marinobacter aquaeolei</i> V78                                                    |                                 | group 2            | FFYPADFTFVCPTEVSTTHKAWHDHDTSEQGLADRAAEGVGVKG |
|       |          | 120326592 | gb  | ABM20907.1        | Alkyl hydroperoxide reductase [Thiol specific antioxidant] | <i>Marinobacter aquaeolei</i> V78                                                    |                                 |                    |                                              |
| 9     |          | 30749577  | tbl | INBJ              | A Chain A, Crystall Structure Of Ahpc With Active Site     | <i>Salmonella typhimurium</i>                                                        |                                 | group 2            | FFYPADFTFVSPTEVSTTHKAWHSSSEEGADRAAEGVGVKG    |
|       |          | 30749578  | tbl | INBJ              | B Chain B, Crystall Structure Of Ahpc With Active Site     | <i>Salmonella typhimurium</i>                                                        |                                 |                    |                                              |
|       |          | 30749579  | tbl | INBJ              | C Chain C, Crystall Structure Of Ahpc With Active Site     | <i>Salmonella typhimurium</i>                                                        |                                 |                    |                                              |
|       |          | 30749580  | tbl | INBJ              | D Chain D, Crystall Structure Of Ahpc With Active Site     | <i>Salmonella typhimurium</i>                                                        |                                 |                    |                                              |
|       |          | 30749581  | tbl | INBJ              | E Chain E, Crystall Structure Of Ahpc With Active Site     | <i>Salmonella typhimurium</i>                                                        |                                 |                    |                                              |
|       |          | 30749582  | tbl | INBJ              | F Chain F, Crystall Structure Of Ahpc With Active Site     | <i>Salmonella typhimurium</i>                                                        |                                 |                    |                                              |
|       |          | 30749583  | tbl | INBJ              | G Chain G, Crystall Structure Of Ahpc With Active Site     | <i>Salmonella typhimurium</i>                                                        |                                 |                    |                                              |
|       |          | 30749584  | tbl | INBJ              | H Chain H, Crystall Structure Of Ahpc With Active Site     | <i>Salmonella typhimurium</i>                                                        |                                 |                    |                                              |
|       |          | 30749585  | tbl | INBJ              | I Chain I, Crystall Structure Of Ahpc With Active Site     | <i>Salmonella typhimurium</i>                                                        |                                 |                    |                                              |
|       |          | 30749586  | tbl | INBJ              | J Chain J, Crystall Structure Of Ahpc With Active Site     | <i>Salmonella typhimurium</i>                                                        |                                 |                    |                                              |
|       |          | 30749587  | tbl | INBJ              | K Chain K, Crystall Structure Of Ahpc With Active Site     | <i>Salmonella typhimurium</i>                                                        |                                 |                    |                                              |
|       |          | 30749588  | tbl | INBJ              | L Chain L, Crystall Structure Of Ahpc With Active Site     | <i>Salmonella typhimurium</i>                                                        |                                 |                    |                                              |
|       |          | 30749589  | tbl | INBJ              | M Chain M, Crystall Structure Of Ahpc With Active Site     | <i>Salmonella typhimurium</i>                                                        |                                 |                    |                                              |
|       |          | 30749590  | tbl | INBJ              | N Chain N, Crystall Structure Of Ahpc With Active Site     | <i>Salmonella typhimurium</i>                                                        |                                 |                    |                                              |
|       |          | 30749591  | tbl | INBJ              | O Chain O, Crystall Structure Of Ahpc With Active Site     | <i>Salmonella typhimurium</i>                                                        |                                 |                    |                                              |
|       |          | 30749592  | tbl | INBJ              | P Chain P, Crystall Structure Of Ahpc With Active Site     | <i>Salmonella typhimurium</i>                                                        |                                 |                    |                                              |
|       |          | 30749593  | tbl | INBJ              | Q Chain Q, Crystall Structure Of Ahpc With Active Site     | <i>Salmonella typhimurium</i>                                                        |                                 |                    |                                              |
|       |          | 30749594  | tbl | INBJ              | R Chain R, Crystall Structure Of Ahpc With Active Site     | <i>Salmonella typhimurium</i>                                                        |                                 |                    |                                              |
|       |          | 30749595  | tbl | INBJ              | S Chain S, Crystall Structure Of Ahpc With Active Site     | <i>Salmonella typhimurium</i>                                                        |                                 |                    |                                              |
|       |          | 30749596  | tbl | INBJ              | T Chain T, Crystall Structure Of Ahpc With Active Site     | <i>Salmonella typhimurium</i>                                                        |                                 |                    |                                              |
| 10    |          | 83592754  | ref | YP_426506.1       | Alkyl hydroperoxide reductase [Thiol specific antioxidant] | <i>Rhodospirillum rubrum</i> ATCC 11170                                              |                                 | group 2            | FFYPADFTFVCPTEVSTAHKAWHDHDTSEVLIALADRAGAGIG  |
|       |          | 83575668  | gb  | ABC2219.1         | Alkyl hydroperoxide reductase [Thiol specific antioxidant] | <i>Rhodospirillum rubrum</i> ATCC 11170                                              |                                 |                    |                                              |
| 11    | 1.24E-13 | 68171710  | ref | ZP_00545066.1     | Alkyl hydroperoxide reductase [Thiol specific antioxidant] | <i>Enrichia chaffeensis</i> str. Sapulpa                                             |                                 | group 1            | NLKFYPRDFTFVCPTEISTCHSHWRNSIKGGIDNSIALRA     |
|       |          | 86658172  | ref | YP_507536.1       | antioxidant, AhpC/Tsa family                               | <i>Enrichia chaffeensis</i> str. Arkansas                                            |                                 |                    |                                              |
|       |          | 67998666  | tbl | EA0M55662.1       | Alkyl hydroperoxide reductase [Thiol specific antioxidant] | <i>Enrichia chaffeensis</i> str. Sapulpa                                             |                                 |                    |                                              |
|       |          | 88599629  | tbl | ABD45098.1        | antioxidant, AhpC/Tsa family                               | <i>Enrichia chaffeensis</i> str. Arkansas                                            |                                 |                    |                                              |
| 12    |          | 104781414 | ref | YP_607912.1       | Alkyl hydroperoxide reductase, C22 subunit, thioredoxin    | <i>Pseudomonas entomophila</i> L48                                                   |                                 | group 2            | FFYPADFTFVCPTEVSTTHKAWHDHDTSDVLIAGLADRGGGGV  |
|       |          | 95110401  | emb | CAK15109.1        | Alkyl hydroperoxide reductase, C22 subunit, thioredoxin    | <i>Pseudomonas entomophila</i> L48                                                   |                                 |                    |                                              |
| 13    | 2.79E-17 | 124267282 | ref | YP_01021286.1     | Alkyl hydroperoxide reductase protein                      | <i>Methylobium petroaleophilum</i> PM1                                               |                                 | group 2            | VFYPADFTFVCPTEISTAHKAWHDHDTSDVLIAGLDRGNGIG   |
|       |          | 124260057 | tbl | ABM95051.1        | Alkyl hydroperoxide reductase protein                      | <i>Methylobium petroaleophilum</i> PM1                                               |                                 |                    |                                              |
| 14    |          | 145627042 | tbl | ZP_01777045.1     | Alkyl hydroperoxide reductase [Thiol specific antioxidant] | <i>Geobacter bemiidensis</i> Bem                                                     |                                 | group 1            | TLLAALAINIKKFYFPMDFTFVCPTERGDLDGVALRARSV     |
|       |          | 144942660 | tbl | EDJ7782.1         | Alkyl hydroperoxide reductase [Thiol specific antioxidant] | <i>Geobacter bemiidensis</i> Bem                                                     |                                 |                    |                                              |
| 15    | 2.92E-14 | 147919357 | ref | YP_686907.1       | 2-cysteine peroxiredoxin                                   | uncultured methanogenic archaeon RC-1                                                |                                 | group 2            | SGTIAPLKVFPADFTYVCPKEFSVHWKAWHNSITPDGLSYRA   |
|       |          | 110622303 | emb | CAJ3758.1         | 2-cysteine peroxiredoxin                                   | uncultured methanogenic archaeon RC-1                                                |                                 |                    |                                              |
| 16    |          | 148244267 | tbl | YP_001218961.1    | peroxiredoxin                                              | <i>Candidatus Vesicomycosoccus okutanii</i> HA                                       |                                 | group 1            | VLVFFYPLDFTFVCPSEVSVTHNAWKIDPDGGLGTGVALRA    |
|       |          | 146326094 | tbl | BAF61237.1        | peroxiredoxin                                              | <i>Candidatus Vesicomycosoccus okutanii</i> HA                                       |                                 |                    |                                              |



|    |          |            |     |                |                                                           |                                                              |         |                                              |
|----|----------|------------|-----|----------------|-----------------------------------------------------------|--------------------------------------------------------------|---------|----------------------------------------------|
| 17 | 1.16E-14 | 73663642   | ref | YP_302423.1    | putative alkyl hydroperoxide reductase subunit C          | Staphylococcus saprophyticus subsp. saprophyticus ATCC 15305 | group 2 | NLKGFPADFSFVCPTEVSTVHKAWHDSLGLAQRGADGIG      |
|    |          | 123761495  | sp  | O48U1B         | AhPC_STAS1 Alkyl hydroperoxide reductase subunit          | Staphylococcus saprophyticus subsp. saprophyticus ATCC 15304 |         |                                              |
|    |          | 72498157   | dbj | BAE19476.1     | putative alkyl hydroperoxide reductase subunit C          | Staphylococcus saprophyticus subsp. saprophyticus ATCC 15305 | group 1 | VLVFFYPLDFTFVCPSEVSTHNAWRNTPVNGIGGGVAFRR     |
| 18 |          | 104780414  | ref | YP_606912.1    | peroxiredoxin (alkyl hydroperoxide reductase C)           | Pseudomonas entomophila L48                                  | group 1 | VDVVFYPLDFTFVCPSESHYA WCLGQEGGGVGLVAGIALRG   |
|    |          | 95108401   | emb | CAK14101.1     | putative peroxiredoxin (alkyl hydroperoxide reductase)    | Pseudomonas entomophila L48                                  | group 1 | VDVVFYPLDFTFVCPSEVSHAWINTPRNGGLVLLSGLALRG    |
|    |          | 157439234  | gb  | ED082442.1     | Peroxiredoxin 1                                           | giardia lamblia ATCC 50803                                   | group 1 | FFYPLDFTFVCPTEVSTHNAWRNTPVKGIGGAGVAFRR       |
| 20 |          | 75070966   | sp  | O5REY3         | PRDX3_PONPY_Thioredoxin-dependent peroxide reductase      | Pongo pygmaeus                                               | group 1 | VLVFFYPLDFTFVCPSEVSTHNAWRNTPVKGIGGAGVAFRR    |
|    |          | 55725787   | emb | CAH86674.1     | hypothetical protein                                      |                                                              | group 1 | FFYPLDFTFVCPTEVSTHNAWRNTPVKGIGGAGVAFRR       |
| 21 |          | 91715447   | ref | YP_563096.1    | alkyl hydroperoxide reductase/Thiol specific antioxidant  | Shewanella denitrificans OS217                               | group 1 | FFYPLDFTFVCPTEVSTHNAWRNTPVKGIGGAGVAFRR       |
|    |          | 91715447   | ref | ABE55373.1     | alkyl hydroperoxide reductase/Thiol specific antioxidant  | Shewanella denitrificans OS217                               | group 2 | FFYPLDFTFVCPTEVSTHNAWRNTPVKGIGGAGVAFRR       |
| 22 |          | 16121148   | ref | NP_421712.1    | alkyl hydroperoxide reductase, subunit c                  | Caulobacter crescentus CB15                                  | group 2 | VLLFFYPLDFTFVCPTEVSTHNAWRNTPVKGIGGAGVAFRR    |
|    |          | 13424540   | gb  | AAK2480.1      | alkyl hydroperoxide reductase, subunit c                  | Caulobacter crescentus CB15                                  | group 1 | VLLFFYPLDFTFVCPTEVSTHNAWRNTPVKGIGGAGVAFRR    |
| 23 |          | 55742316   | ref | NP_001006812   | peroxiredoxin 4                                           | Xenopus tropicalis                                           | group 1 | VLLFFYPLDFTFVCPTEVSTHNAWRNTPVKGIGGAGVAFRR    |
|    |          | 49698976   | gb  | AAH76892.1     | Peroxiredoxin 4                                           | Xenopus tropicalis                                           |         |                                              |
|    |          | 89269080   | emb | CAJ83798.1     | peroxiredoxin 4                                           | Xenopus tropicalis                                           |         |                                              |
| 24 |          | 16081313   | ref | NP_393630.1    | probable peroxiredoxin                                    | Thermoplasma acidophilum DSM 1728                            | group 1 | VNGQIKKRVLRFFYPADFTFVCPTEVSTVSKGTATGNARQGVLE |
|    |          | 10639297   | emb | CAC11299.1     | probable peroxiredoxin                                    | Thermoplasma acidophilum                                     |         |                                              |
| 25 | 6.67E-11 | 165966373  | gb  | EDR23602.1     | hypothetical protein, conserved                           | Entamoeba dispar SAW760                                      | outlier | KAQIGLFLYPLDFTFVCPTEVSTHNAWRNTPVKGIGGAGVAFRR |
|    |          | 90086421   | dbj | BAE91763.1     | unannoted protein product                                 | Mycaca fascicularis                                          | group 1 | FFYPLDFTFVCPTEVSTHNAWRNTPVKGIGGAGVAFRR       |
| 27 |          | 148234128  | ref | NP_001088817   | hypothetical protein LOC496089                            | Xenopus laevis                                               | group 1 | FFYPLDFTFVCPTEVSTHNAWRNTPVKGIGGAGVAFRR       |
|    |          | 56269242   | gb  | AAH87512.1     | LOC496089 protein                                         | Xenopus laevis                                               | group 1 | FFYPLDFTFVCPTEVSTHNAWRNTPVKGIGGAGVAFRR       |
| 28 |          | 4380669    | emb | CAA80269.1     | thiol-specific antioxidant protein                        | Homo sapiens                                                 | group 1 | FFYPLDFTFVCPTEVSTHNAWRNTPVKGIGGAGVAFRR       |
| 29 |          | 124809308  | ref | XP_001348542   | 2-Cys peroxiredoxin                                       | Plasmodium falciparum 3D7                                    | group 1 | YFYPDLDFVCPSECVTHLAWNTKPLKGGIGDSVSLRAVLI     |
|    |          | 7677316    | gb  | AAE67110.1     | AF225977_1 thioredoxin peroxidase 1                       | Plasmodium falciparum                                        |         |                                              |
|    |          | 10780978   | gb  | AAG14354.1     | AF294426_1 2-Cys peroxiredoxin                            | Plasmodium falciparum                                        |         |                                              |
|    |          | 23497438   | dbj | BAAN36981.1    | AE014822_16 2-Cys peroxiredoxin                           | Plasmodium falciparum 3D7                                    |         |                                              |
| 30 |          | 82539442   | ref | XP_724109.1    | 2-Cys peroxiredoxin                                       | Plasmodium falciparum                                        | group 1 | YFYPDLDFVCPSECVTHLAWNTKPLKGGIGDSVSLRAVLI     |
|    |          | 23478642   | gb  | EAA15674.1     | thioredoxin peroxidase 1                                  | Plasmodium yoelii yoelii str. 17XNL                          |         |                                              |
|    |          | 28201169   | dbj | BAC56717.1     | 2-Cys peroxiredoxin                                       | Plasmodium yoelii                                            |         |                                              |
| 31 |          | 23394396   | gb  | AAN314487.1    | thioredoxin peroxidase                                    | Phytophthora infestans                                       |         |                                              |
| 32 |          | 164841700  | gb  | EDR05859.1     | 2-systeine peroxiredoxin                                  | Laccaria bicolor S238N-H82                                   | group 1 | VLTFYPLDFTFVCPTEVSTHNAWRNTPVKGIGGAGVAFRR     |
| 33 |          | 38515000   | gb  | AACT72300.1    | trypanoxin peroxidase                                     | Citrichidia fasciculata                                      | group 1 | FFYPLDFTFVCPTEVSTHNAWRNTPVKGIGGAGVAFRR       |
| 34 |          | 117618902  | ref | YP_856052.1    | alkyl hydroperoxide reductase 1                           | Aeromonas hydrophila subsp. hydrophila ATCC 7966             | group 1 | VLVFFYPLDFTFVCPSEVSHNAWRNTPVKGIGGAGVAFRR     |
|    |          | 1176560309 | gb  | ABK37957.1     | alkyl hydroperoxide reductase 1                           | Aeromonas hydrophila subsp. hydrophila ATCC 7966             |         |                                              |
| 35 |          | 27904673   | ref | NP_777799.1    | peroxiredoxin 2                                           | Buchnera aphidicola str. Bp (Baizongia pistaciae)            | group 1 | VLVFFYPLDFTFVCPSEVSHNAWRNTPVKGIGGAGVAFRR     |
|    |          | 38606261   | sp  | O89AS1         | TSAA_BUCBP Probable peroxiredoxin (Thioredoxin dependent) | Buchnera aphidicola str. Bp (Baizongia pistaciae)            |         |                                              |
|    |          | 27904070   | gb  | AAO26904.1     | peroxiredoxin 2                                           | Taenia solium                                                | group 1 | FFYPLDFTFVCPTECVSTHNAWRNTPVKGIGGAGVAFRR      |
| 36 |          | 158519654  | gb  | AAV91322.2     | 2-Cys peroxiredoxin                                       | Homo sapiens                                                 | group 1 | FFYPLDFTFVCPTEVSTHNAWRNTPVKGIGGAGVAFRR       |
| 37 |          | 14250063   | dbj | AAH08435.1     | Peroxiredoxin 3                                           | Mus musculus                                                 | group 1 | FFYPLDFTFVCPTEVSTHNAWRNTPVKGIGGAGVAFRR       |
| 38 |          | 12846314   | dbj | BAE27120.1     | unannoted protein product                                 | Beggiatoa sp. PS                                             | group 1 | VLVFFYPLDFTFVCPTEVSTHNAWRNTPVKGIGGAGVAFRR    |
| 39 |          | 153875270  | ref | YP_02003146.1  | antioxidant, AhpC/Tsa family protein                      | Beggiatoa sp. PS                                             | group 1 | VLVFFYPLDFTFVCPTEVSTHNAWRNTPVKGIGGAGVAFRR    |
|    |          | 152068267  | gb  | EDN66855.1     | antioxidant, AhpC/Tsa family protein                      | Taenionotus camphoratus                                      |         |                                              |
| 40 |          | 42540580   | gb  | AA519193.1     | thioredoxin peroxidase                                    | Candidatus Ruthia magnifica str. Cm (Calyptogenia magnifica) | group 1 | FFYPLDFTFVCPTEVSTHNAWRNTPVKGIGGAGVAFRR       |
| 41 |          | 118602152  | ref | YP_903367.1    | alkyl hydroperoxide reductase/Thiol specific antioxidant  | Candidatus Ruthia magnifica str. Cm (Calyptogenia magnifica) | group 1 | NLKFYPLDFTFVCPSEVSHNAWRNTPVKGIGGAGVAFRR      |
|    |          | 1185667091 | dbj | ABL01896.1     | alkyl hydroperoxide reductase/Thiol specific antioxidant  | Candidatus Ruthia magnifica str. Cm (Calyptogenia magnifica) |         |                                              |
| 42 |          | 77979422   | ref | YP_00834844.1  | COG5450: Peroxiredoxin                                    | Ferula intermedia ATCC 29609                                 | group 1 | VLNLKFFWPMDFVCPSEVSHNAWRNTPVKGIGGAGVAFRR     |
| 43 |          | 149689642  | ref | XP_001493688.1 | PREDICTED: similar to antioxidant protein isoform 2       | Equus caballus                                               | group 1 | FFYPLDFTFVCPTEVSTHNAWRNTPVKGIGGAGVAFRR       |
| 44 |          | 380519855  | gb  | AAH60567.1     | Prdx3 protein                                             | Rattus norvegicus                                            | group 1 | FFYPLDFTFVCPTEVSTHNAWRNTPVKGIGGAGVAFRR       |
| 45 |          | 115526502  | ref | YP_783413.1    | alkyl hydroperoxide reductase/Thiol specific antioxidant  | Rhodopseudomonas palustris BisA53                            | group 1 | FFYPLDFTFVCPTEVSTHNAWRNTPVKGIGGAGVAFRR       |
|    |          | 115520449  | gb  | ABJ08433.1     | alkyl hydroperoxide reductase/Thiol specific antioxidant  | Rhodopseudomonas palustris BisA53                            | group 3 | MLGIGYGVFPKDFVCPTEVTEVGLGKAWRRDHHKAGVATRY    |
| 46 |          | 57095572   | ref | XP_532386.1    | PREDICTED: similar to peroxiredoxin 1 isoform 1           | Canis familiaris                                             | group 1 | FFYPLDFTFVCPTEVSTHNAWRNTPVKGIGGAGVAFRR       |
| 47 | 3.60E-18 | 91776893   | ref | YP_554101.1    | AhpC                                                      | Burkholderia xenovorans LB400                                | group 2 | VFYPADFTFVCPTEVSTHNAWRNTPVKGIGGAGVAFRR       |
|    |          | 91691553   | gb  | ABE34751.1     | alkyl hydroperoxide reductase protein                     | Burkholderia xenovorans LB400                                | group 1 | VGKFFYPLDFTFVCPSEVSTHNAWRNTPVKGIGGAGVAFRR    |
| 48 |          | 94499181   | ref | YP_01305719.1  | antioxidant, AhpC/Tsa family protein                      | Oceanobacter sp. RED65                                       | group 1 | FFYPLDFTFVCPTEVSTHNAWRNTPVKGIGGAGVAFRR       |
|    |          | 94428813   | gb  | EAT13785.1     | antioxidant, AhpC/Tsa family protein                      | Oceanobacter sp. RED65                                       | group 1 | FFYPLDFTFVCPTEVSTHNAWRNTPVKGIGGAGVAFRR       |
| 49 |          | 81914708   | sp  | O8K3U7         | PRDX2_CRIGR Peroxiredoxin-2                               | Cricetulus griseus                                           | group 1 | FFYPLDFTFVCPTEVSTHNAWRNTPVKGIGGAGVAFRR       |
|    |          | 22324906   | gb  | AAH56573.1     | peroxiredoxin 2                                           | Cricetulus griseus                                           | group 1 | FFYPLDFTFVCPTEVSTHNAWRNTPVKGIGGAGVAFRR       |
| 50 | 1.87E-18 | 21357347   | ref | NP_648759.1    | CG6888 CG6888-PA, isoform A                               | Drosophila melanogaster                                      | group 1 | VFYPADFTFVCPTECVTHCAWNTPRNGGLGNMKTGLALRA     |
|    |          | 7294303    | gb  | AAF49652.1     | CG6888-PA                                                 | Drosophila melanogaster                                      |         |                                              |
|    |          | 19527931   | gb  | AAL90080.1     | AT16346P                                                  | Drosophila melanogaster                                      |         |                                              |
| 51 | 4.55E-16 | 86132176   | ref | YP_01050771.1  | putative thioredoxin peroxidase                           | Cellulopaga sp. MED134                                       | group 4 | FWYPKDFVCPTEGTEGTVHFALWNTAKNGIEVLDVNTVYRA    |
|    |          | 85817095   | gb  | EAQ38278.1     | putative thioredoxin peroxidase                           | Dokdonia donghaiensis MED134                                 |         |                                              |
| 52 |          | 94676828   | ref | YP_589022.1    | antioxidant, AhpC/Tsa family                              | Baumannia cicadellinicola str. Hc (Homalodisca coagulata)    | group 1 | VLVFFWPMDFVCPSEVSHNAWRNTPVKGIGGAGVAFRR       |
|    |          | 942119976  | gb  | ABF14135.1     | antioxidant, AhpC/Tsa family                              | Baumannia cicadellinicola str. Hc (Homalodisca coagulata)    | group 2 | IFMPAAF1FNCPTESHKVVHHTSDVQKGEGLALRGEVAVKVS   |
| 53 | 5.39E-11 | 118054286  | ref | YP_01522826.1  | alkyl hydroperoxide reductase/Thiol specific antioxidant  | Comamonas testosteroni KF-1                                  | group 2 | MLGIGYGVFPKDFVCPTEVTEVGLGKAWRRDHHKAGVATRY    |
|    |          | 117938485  | gb  | EAV12649.1     | alkyl hydroperoxide reductase/Thiol specific antioxidant  | Comamonas testosteroni KF-1                                  | group 3 | MLGIGYGVFPKDFVCPTEVTEVGLGKAWRRDHHKAGVATRY    |
| 54 | 2.12E-12 | 163702225  | ref | YP_02121068.1  | AhpC, alkyl hydroperoxide reductase C                     | Methylobacterium nodulans ORS 2060                           | group 3 | MLGIGYGVFPKDFVCPTEVTEVGLGKAWRRDHHKAGVATRY    |
|    |          | 162431562  | gb  | EDQ42163.1     | AhpC, alkyl hydroperoxide reductase C                     | Methylobacterium nodulans ORS 2060                           |         |                                              |
| 55 |          | 73998673   | ref | XP_865127.1    | PREDICTED: similar to Thioredoxin-dependent perox         | Canis familiaris                                             | group 1 | FFYPLDFTFVCPTEVSTHNAWRNTPVKGIGGAGVAFRR       |

|    |          |               |                |                                                    |                                                    |  |         |                                             |
|----|----------|---------------|----------------|----------------------------------------------------|----------------------------------------------------|--|---------|---------------------------------------------|
| 56 | 0        | 55824562.gb   | AAV66401.1     | peroxidoxin 1                                      | <i>Macaca fascicularis</i>                         |  | group 1 | FFYPLDFTFVCPTEVSDSCHLAWINPKQGG.LVLEKIGSIFRG |
| 57 | 0        | 114633019.ref | XP_001154135.1 | PREDICTED: peroxidoxin_3 isoform 2                 | <i>Pan troglodytes</i>                             |  | group 1 | FFYPLDFTFVCPTEVSVSHLAWINTPRNGGLVLLSGLALRG   |
| 58 | 0        | 56416176.ref  | YP_156957.1    | Peroxidoxin, AhpC/Tsa family                       | <i>Idiomarina licheniis L2TR</i>                   |  | group 3 | FFYPKDFTFVCPTEVMGVKLAWRREHPENVALRAVSNRALG   |
| 59 | 0        | 561780686.gb  | AAV83408.1     | Peroxidoxin, AhpC/Tsa family                       | <i>Idiomarina licheniis L2TR</i>                   |  | group 1 | FFWPKDFTFVCPTEVSVHFHWKNTFVKGGIGEAIALRGNMK   |
| 60 | 0        | 54301401.gb   | AAV33155.1     | alkyl hydroperoxide reductase                      | <i>Helicobacter pylori</i>                         |  | group 1 | FFYPADFTFVCPTEVSVTHKAWWQYDEKGIATGNAGRGVLE   |
| 61 | 0        | 13541053.ref  | NP_110741.1    | Peroxidoxin                                        | <i>Thermoplasma volcanium GSS1</i>                 |  | group 1 | NLKFYPLNFTFVCPTEVSVCHKAWKL.TPKYKGGIGAVAVRA  |
| 62 | 0        | 14324437.dbi  | BAE59365.1     | thioredoxin peroxidase                             | <i>Orientia tsutsugamushi Boryong</i>              |  | group 1 | FFYPLDFTFVCPTEVSHLAWINPRQGGVLDVSDGVPFRGRSV  |
| 63 | 5.15E-16 | 152992873.ref | XP_001358594.1 | PREDICTED: similar to 2-Cys thioredoxin peroxidase | <i>Orientia tsutsugamushi Boryong</i>              |  | group 1 | STLVMRKTFCECFYADFTFVCPTEVSTVTKLKTIGEVALRG   |
| 64 | 7.03E-22 | 123382138.ref | XP_001298652.1 | peroxidoxin, AhpC/Tsa family                       | <i>Sulfurovum sp. NBC37-1</i>                      |  | group 1 | FAWPLDFTFVCPTEVLDVSDTHLAWINPRDGGIGAGHDLRG   |
| 65 | 0        | 119446861.ref | YP_01611684.1  | hyparedoxin peroxidase, putative                   | <i>Trichomonas vaginalis G3</i>                    |  | group 2 | VLGFFYPADFTFVCPTEVSTTHKAWHDTSDDDGLARGLDGLIG |
| 66 | 0        | 11847688.gb   | EAW28934.1     | tryparedoxin peroxidase, putative                  | <i>Trichomonas vaginalis G3</i>                    |  | group 3 | LLTIGFFWPKDFTFVCPTEVLDVSDTHKAWHDTSDVADRAVSV |
| 67 | 0        | 4388655.emb   | CAA06923.1     | alkyl hydroperoxide reductase subunit C            | <i>Alteromonadates bacterium TM-7</i>              |  | group 1 | LFYPMDFTFVCPTEVSDSCHLAWINPRKGGVLSQGISLRG    |
| 68 | 0        | 26989162.ref  | NP_744587.1    | alkyl hydroperoxide reductase                      | <i>Alteromonadates bacterium TM-7</i>              |  | group 2 | FFYPADFTFVCPTEVSTTHKAWHDTSDVLIAGLADRGDGGVVG |
| 69 | 1.00E-09 | 118411034.ref | YP_874429.1    | alkyl hydroperoxide reductase, C subunit           | <i>Pseudomonas putida KT2440</i>                   |  | outlier | YVKIFYPSNFTAVSPTSEVSHLQFLLSKRRGGLEDGFSLPG   |
| 70 | 1.37E-14 | 153953000.ref | YP_001393765.1 | alkyl hydroperoxide reductase, C subunit           | <i>Pseudomonas putida F1</i>                       |  | group 2 | CFYPADFSFVCPTEVSTTHKAWHDSQVLIQGLNLRGAGSNG   |
| 71 | 0        | 146345881.gb  | EDK32417.1     | alkyl hydroperoxide reductase, C subunit           | <i>Pseudomonas putida GB-1</i>                     |  | group 1 | VLVFFYPLDFTFVCPSEVSTHNAWRNTAIDGGIGAGAVAFRG  |
| 72 | 1.64E-18 | 53721528.ref  | YP_110513.1    | alkyl hydroperoxide reductase, C subunit           | <i>Pseudomonas putida F1</i>                       |  | group 2 | VFYPADFTFVCPTEVSTTHKAWHDTSDVLIQGLALRGGEIK   |
| 73 | 0        | 999119019.ref | YP_013197000.1 | alkyl hydroperoxide reductase, C subunit           | <i>Phaeoaculum tricornutum</i>                     |  | group 2 |                                             |
| 74 | 1.26E-11 | 165903070.gb  | EDR26707.1     | alkyl hydroperoxide reductase, C subunit           | <i>Clostridium kluyveri DSM 555</i>                |  | group 1 |                                             |
| 75 | 1.95E-11 | 164563475.ref | ED_064402.1    | alkyl hydroperoxide reductase, C subunit           | <i>Clostridium kluyveri DSM 555</i>                |  | outlier |                                             |
| 76 | 0        | 4403306.gb    | AAAS40464.1    | enhancer protein                                   | <i>Entamoeba dispar SAW760</i>                     |  | group 1 |                                             |
| 77 | 1.07E-16 | 152974156.ref | YP_001737367.3 | peroxidoxin                                        | <i>Rickettsia canadensis str. McKiel</i>           |  | group 2 | VGKFFYPLDFTFVCPSEVSVSHLAWKNTPHKGGGLDGVVALRG |
| 78 | 1.17E-14 | 160947446.ref | ZP_02094613.1  | hypothetical protein PEPMIC_01380                  | <i>Bacillus cereus subsp. cytotoxic NVH 391-98</i> |  | group 2 | KAQIGLYPLDWTFCVCPTESEVAGLVGDSVHQAWCEADK     |
| 79 | 0        | 158446680.gb  | EDP23575.1     | hypothetical protein PEPMIC_01380                  | <i>Bacillus cereus subsp. cytotoxic NVH 391-98</i> |  | group 2 | IFMPAAFTNCPTEVSHKAWHDTSPVYKGFVAGLALRGEVVK   |
| 80 | 0        | 159030269.emb | CAU91164.1     | unannotated protein product                        | <i>Peptostreptococcus micros ATCC 33270</i>        |  | group 1 |                                             |
| 81 | 0        | 109003875.ref | XP_001102188.1 | PREDICTED: similar to peroxidoxin 1 isoform 2      | <i>Peptostreptococcus micros ATCC 33270</i>        |  | group 1 | FFYPLDFTFVCPTEVSDSCHLAWINPKQGGVLEKIGSIFRG   |
|    |          |               |                | 109003878.ref                                      | <i>Vibrio Harvey HY01</i>                          |  | group 1 |                                             |
|    |          |               |                |                                                    | <i>Vibrio Harvey ATCC BAA-1116</i>                 |  | group 1 |                                             |
|    |          |               |                |                                                    | <i>Vibrio Harvey ATCC BAA-1116</i>                 |  | group 1 |                                             |
|    |          |               |                |                                                    | <i>Microcystis aeruginosa FCC 7806</i>             |  | group 1 |                                             |
|    |          |               |                |                                                    | <i>Macaca mulatta</i>                              |  | group 1 |                                             |
|    |          |               |                |                                                    | <i>Macaca mulatta</i>                              |  | group 1 |                                             |

|           |          |                |                                                                            |                                                           |         |  |  |  |                                              |
|-----------|----------|----------------|----------------------------------------------------------------------------|-----------------------------------------------------------|---------|--|--|--|----------------------------------------------|
| 109003881 | ref      | XP_001102380.1 | PREDICTED: similar to peroxiredoxin 1 isoform 4                            | Macaca mulatta                                            |         |  |  |  |                                              |
| 109003884 | ref      | XP_001102473.1 | PREDICTED: similar to peroxiredoxin 1 isoform 5                            | Macaca mulatta                                            |         |  |  |  |                                              |
| 109003888 | ref      | XP_001102571.1 | PREDICTED: similar to peroxiredoxin 1 isoform 6                            | Macaca mulatta                                            |         |  |  |  |                                              |
| 109003891 | ref      | XP_001102655.1 | PREDICTED: similar to peroxiredoxin 1 isoform 7                            | Macaca mulatta                                            |         |  |  |  |                                              |
| 109003894 | ref      | XP_001102742.1 | PREDICTED: similar to peroxiredoxin 1 isoform 8                            | Macaca mulatta                                            |         |  |  |  |                                              |
| 82        | 0        | 871199734.gb   | NP_5749691.1<br>alkyl hydroperoxide reductase/Thiol specific antioxidant   | Novosphingobium aromaticorans DSM 12444                   | group 2 |  |  |  | VGFFYPADFTFVCPTEIQLQGLVSTSHKAWHDSHPVGLADRG   |
| 83        | 0        | 87135415.gb    | ABD26157.1<br>alkyl hydroperoxide reductase/Thiol specific antioxidant     | Raistonia eutropha JMP134                                 | group 3 |  |  |  | YFYPKDFTFVCPTEIENGDFAVLGVKLAWRREHKAGVALRAVS  |
| 84        | 5.11E-16 | 126663881.ref  | NP_017344876.1<br>alkyl hydroperoxide reductase/Thiol specific antioxidant | Raistonia eutropha JMP134                                 | group 4 |  |  |  | VLEFWYPKDFTFVCPTECDTWFHFWLNTAKNGGIESNVTFRA   |
| 85        | 0        | 904073333.ref  | EA294838.1<br>putative thioredoxin peroxidase                              | Flavobacterium bacterium BAL38                            | group 1 |  |  |  | VLVFFYPLDFTFVCPSEISISHAWRNRTAIDGGIGAGVALRG   |
| 86        | 0        | 90311616.gb    | EAS39745.1<br>putative antioxidant, AhpC/Tsa family protein                | Psychromonas sp. CNPT3                                    | group 1 |  |  |  | FFYPLDFTFVCPTEVSVSHLAWINTPRNNGLGVLLAGIALRG   |
| 87        | 8.18E-17 | 189977094.ref  | NP_578451.1<br>alkyl hydroperoxide reductase subunit c                     | Pyrococcus furiosus DSM 3638                              | group 2 |  |  |  | AFYPADFTFVCPTEVSTVHKAWHDTSPESISWRKAEALKVGK   |
| 88        | 3.12E-10 | 48478594.ref   | YP_024300.1<br>alkyl hydroperoxide reductase subunit c                     | Pyrococcus furiosus DSM 3638                              | group 2 |  |  |  | TFYPGDFTFVCATDDSYSHKAWSDTSPAGTAQRGNDGLGLVD   |
| 89        | 1.13E-15 | 163761918.ref  | ZP_02168984.1<br>Xenobiotic-transporting ATPase                            | Bacillus selenitireducens ML510                           | group 2 |  |  |  | VEVCFYPADFTFVCPTEITKQWHDSDSEVLNGLADRAEGIG    |
| 90        | 0        | 54301419.gb    | AAV33164.1<br>alkyl hydroperoxide reductase                                | Bacillus selenitireducens ML510                           | group 1 |  |  |  | FFWPKDFTFVCPTEVSVHFAWKNTPYKGGIGEALRGNMK      |
| 91        | 0        | 160935379.ref  | RF_ZP_02082761.1<br>hypothetical protein CLOBOL_00274                      | Helicobacter pylori                                       | group 2 |  |  |  | VLGFFYPADFTFVCPTEVSOVHKAWHDASRTGSLADGMAERG   |
| 92        | 0        | 126660237.ref  | ZP_01731353.1<br>alkyl hydroperoxide reductase/Thiol specific antioxidant  | Clostridium bolleae ATCC BAA-613                          | group 1 |  |  |  | FFYPLDFTFVCPTEVSVHLAWIQTPREGGVGLVDSGVALRG    |
| 93        | 0        | 125650289.ref  | XP_001335888.1<br>PREDICTED: hypothetical protein                          | Danio rerio                                               | group 1 |  |  |  | AGNAHIGPDTAKAMPFGDVRFPYLPDFTFVCPTECEVDS      |
| 94        | 0        | 332440428.ref  | NP_875370.1<br>Peroxiredoxin, AhpC/TSA family                              | Prochlorococcus marinus subsp. marinus str. COMP1375      | group 1 |  |  |  | FFYPLDFTFVCPTEVSVCHLAWIQTPRRGGIYVNDGEADR     |
| 95        | 0        | 145631197.ref  | ZP_01786897.1<br>single-strand DNA-binding protein                         | Haemophilus influenzae 22-4-21                            | group 1 |  |  |  | VLVFFYPLDFTFVCPSEVSIHAWRNTPNNGIGAGVALRA      |
| 96        | 1.15E-16 | 300185859.ref  | NP_830216.1<br>alkyl hydroperoxide reductase C22                           | Haemophilus influenzae R3021                              | group 2 |  |  |  | CFYPADFTFVCPTEVSTTHKAWHDSSEVLMIEGLAARGADGIG  |
| 97        | 1.65E-16 | 158967.gb      | AAA29110.1<br>peripheral membrane protein                                  | Bacillus cereus G9241                                     | group 1 |  |  |  | ADKRNELSNVMLFYPLDWTFCVPTSEVSVKGGVAGIARRG     |
| 98        | 0        | 84702544.ref   | ZP_01017119.1<br>AhpC, alkyl hydroperoxide reductase C                     | Parvularcula bermudensis HTCC2503                         | group 3 |  |  |  | MLGIGFYPKDFTFVCPTEVLGCKLAWRRDHPHGVALRALSV    |
| 99        | 0        | 119658249.ref  | ZP_01639673.1<br>alkyl hydroperoxide reductase/Thiol specific antioxidant  | Parvularcula bermudensis HTCC2503                         | group 1 |  |  |  | VLVFFYPLDFTFVCPSEVSIHAWRNTPNNGIGGGVAFRG      |
| 100       | 0        | 57241472.ref   | ZP_00369418.1<br>AhpC/TSA family                                           | Campylobacter lari RM2100                                 | group 1 |  |  |  | VLGFFYPKDFTFVCPSEVSCSHFAWKNMFPVQGGIGEAVALRG  |
| 101       | 0        | 157374987.ref  | NP_001473987.1<br>alkyl hydroperoxide reductase/thiol specific antioxidant | Campylobacter lari RM2100                                 | group 1 |  |  |  | VLVFFYPLDFTFVCPSEVSIHAWRNTPVEGGIGAGVAFRG     |
| 102       | 3.52E-12 | 119877906.ref  | ZP_01644880.1<br>alkyl hydroperoxide reductase/Thiol specific antioxidant  | Shewanella sediminis HAM-EB3                              | group 2 |  |  |  | VSDIFMPAAFNFNCPTESHKVVHETSPVKGEGALRGEVVK     |
| 103       | 0        | 160877873.pdb  | Z29S<br>Chain A, Crystal Structure Analysis Of Rat Hbp23PE                 | Stenotrophomonas maltophilia R551-3                       | group 1 |  |  |  | FFYPLDFTFVSPTEVDSCHLAWINTPKQGGIYVLEKIGISFRG  |
| 104       | 4.88E-12 | 146283489.ref  | YP_001173642.1<br>alkyl hydroperoxide reductase subunit C                  | Rattus norvegicus                                         | group 2 |  |  |  | IFMPAFAFNFNCPTESHKVVHETSPVKGEGALRGEVVKVSE    |
| 105       | 0        | 555848233.gb   | AAV53376.1<br>peroxiredoxins                                               | Pseudomonas stutzeri A1501<br>Phanerochaete chrysosporium | group 1 |  |  |  | FFYPMDFTFVCPTEVSTVSHFAWASQPRQGGIYVLDKGVALLRG |

|     |          |            |       |                |                                                                                        |                                                                       |         |                                               |
|-----|----------|------------|-------|----------------|----------------------------------------------------------------------------------------|-----------------------------------------------------------------------|---------|-----------------------------------------------|
| 106 | 1.10E-16 | 94966480   | [dbj] | BAE94183.1     | peroxidoxin                                                                            | <i>Geobacillus stearothermophilus</i>                                 | group 2 | CFYPADFTFVCPTEVSTTHKAWHDTSPVLDQGLAQRGADGIG    |
| 107 | 0        | 118084001  | [ref] | XP_416800.2    | PREDICTED: similar to MGC82793, protein isoform 2                                      | <i>Gallus gallus</i>                                                  | group 1 | ELKFFYPLDFTFVCPTECSVTHLAWINTPRQGGIQQGHALRG    |
| 108 | 0        | 1179224977 | [ref] | XP_86594.1     | alkyl hydroperoxidase/Thiol specific antioxidant                                       | <i>Magnatococcus sp. MC-1</i>                                         | group 1 | VLVFFYPLDFTFVCPSECSHSLAWKNTKNGGIGDIALRG       |
| 109 | 0        | 117608733  | [gb]  | ABK44188.1     | alkyl hydroperoxidase/Thiol specific antioxidant                                       | <i>Magnatococcus sp. MC-1</i>                                         | group 1 | VSLFFYPMDFTFVCPTEHSLAWNTNPIEGGIVLIEGVALRG     |
| 110 | 4.45E-15 | 34580633   | [ref] | NP_907868.1    | peroxidoxin, putative                                                                  | <i>Listeria monocytogenes EGD-e</i>                                   | group 1 | SSVLKRMFVSSCFYPADFTFVCPTEITGELGVLAEGLALRG     |
| 111 | 0        | 22298997   | [ref] | NP_682244.1    | thioredoxin peroxidase                                                                 | <i>Listeria monocytogenes str. 1/2a F6854</i>                         | group 1 | FFYPLDFTFVCPTEVSVSHLAWTQIDRAGGVGLTEGVALRG     |
| 112 | 0        | 13488586   | [gb]  | BAAC26236.1    | thioredoxin peroxidase BgtPx                                                           | <i>Thermosynechococcus elongatus H36B</i>                             | group 1 | VIKFFYPLDFTFVCPTECSVTHLAWTNVPRQGGIQLGHSLRG    |
| 113 | 8.99E-11 | 77405652   | [ref] | XP_00782740.1  | alkyl hydroperoxidase, subunit C                                                       | <i>Biophtalaria giabralta</i>                                         | group 2 | FCFYADFSVCPTEVSTVHKAWHDDSDVLDGLAQRGADGIG      |
| 114 | 0        | 42524877   | [ref] | NP_970287.1    | alkyl hydroperoxidase, subunit C                                                       | <i>Streptococcus agalactiae H36B</i>                                  | group 1 | GGGEVKKFFYPLDFTFVCPTECSVSHKRWLRDDLVLFKRGAIIRG |
| 115 | 0        | 110800612  | [ref] | XP_01388828.1  | conserved hypothetical protein                                                         | <i>Bdellovibrio bacteriovorus HD100</i>                               | group 1 | FFYPLDFTFVCPTEVGLGVDSAHLAWIKRKGDEGVAQRGQKTI   |
| 116 | 2.47E-19 | 110548651  | [gb]  | EA716186.1     | Alkyl hydroperoxidase/Thiol specific antioxidant                                       | <i>Geobacter sp. FCC-32</i>                                           | group 1 | NLSVSYFFWPMNFTFVCPSESHQAWRSTSTLGGIGIGVALRA    |
| 117 | 0        | 16076486   | [ref] | NP_389305.1    | hypothetical protein WGS1-p487                                                         | <i>Wigglesworthia gossimidia endosymbiont of Glossina brevipalpis</i> | group 1 | NMKFFYPMDFTFVCPTEVSTTHLAWINTDRENGLIEGVALRG    |
| 118 | 0        | 159466035  | [ref] | XP_001690737.1 | peroxidoxin                                                                            | <i>Bacillus subtilis subsp. subtilis str. 168</i>                     | group 1 | VSAFFYKDFTFVCPTEHSLAWIRTPRRGGGLGVLLGVALRG     |
| 119 | 2.98E-14 | 168270361  | [ref] | ED096214.1     | alkyl hydroperoxidase reductase                                                        | <i>Chlamydomonas reinhardtii</i>                                      | group 2 | CFYPADFSVCPTEVSTVHKAWHDDSDVLDGLAQRGADGIG      |
| 120 | 0        | 33188454   | [ref] | NP_859428.1    | peroxidoxin 2 isoform c                                                                | <i>Streptococcus mutans UA159</i>                                     | group 1 | SGNARIGDGAFFKFFYPLDFTFVCPTEVGLTHLAWYEQGFSI    |
| 121 | 0        | 12656871   | [gb]  | AAK00633.1     | AF 225212, 1 tyrosine peroxidase                                                       | <i>Homo sapiens</i>                                                   | group 1 | FFYPLDFTFVCPTEVSRVLAHLQWTLQDRKGLGQGVAYRG      |
| 122 | 1.98E-16 | 75760435   | [ref] | XP_00740477.1  | mCG192388                                                                              | <i>Mus musculus</i>                                                   | group 1 | FFYPLDFTFVCPTEVSDSCHLAWINTPKGGIQLVLEKISFERG   |
| 123 | 0        | 74492064   | [gb]  | EA059258.1     | peroxidoxin                                                                            | <i>Bacillus thuringiensis serovar israelensis ATCC 35646</i>          | group 2 | CFYPADFTFVCPTEVSTTHKAWHDDSDVLDGLAQRGADGIG     |
| 124 | 0        | 160347104  | [gb]  | ABX26130.1     | tyrosine peroxidase                                                                    | <i>Leishmania major</i>                                               | group 1 | FFYPLDFTFVCPTECSHLQWTSVDRKGLGVLDSGVAYRG       |
| 125 | 0        | 32452624   | [ref] | NP_859047.1    | peroxidoxin 1                                                                          | <i>Homo sapiens</i>                                                   | group 1 | FFYPLDFTFVCPTEVSDSCHLAWINTPKGGIQLVLEKISFERG   |
| 126 | 0        | 32452666   | [ref] | NP_859048.1    | peroxidoxin 1                                                                          | <i>Homo sapiens</i>                                                   |         |                                               |
| 127 | 0        | 55586231   | [ref] | XP_513123.1    | PREDICTED: peroxidoxin 1 isoform 6                                                     | <i>Pan troglodytes</i>                                                |         |                                               |
| 128 | 0        | 114558242  | [ref] | XP_001158454.1 | PREDICTED: peroxidoxin 1 isoform 2                                                     | <i>Pan troglodytes</i>                                                |         |                                               |
| 129 | 0        | 114558244  | [ref] | XP_001156515.1 | PREDICTED: peroxidoxin 1 isoform 3                                                     | <i>Pan troglodytes</i>                                                |         |                                               |
| 130 | 0        | 114558246  | [ref] | XP_001156568.1 | PREDICTED: peroxidoxin 1 isoform 4                                                     | <i>Pan troglodytes</i>                                                |         |                                               |
| 131 | 0        | 114558248  | [ref] | XP_001156623.1 | PREDICTED: peroxidoxin 1 isoform 5                                                     | <i>Pan troglodytes</i>                                                |         |                                               |
| 132 | 0        | 548453     | [sp]  | Q08830         | PRDX1_HUMAN Peroxidoxin-1 (Thioredoxin peroxidase proliferation associated gene) (pag) | <i>Homo sapiens</i>                                                   |         |                                               |
| 133 | 0        | 287641     | [emb] | CAA48137.1     | peroxidoxin                                                                            | <i>Homo sapiens</i>                                                   |         |                                               |
| 134 | 0        | 13837907   | [gb]  | AAH07063.1     | peroxidoxin 1                                                                          | <i>Homo sapiens</i>                                                   |         |                                               |
| 135 | 0        | 18204954   | [gb]  | AAH21683.1     | peroxidoxin 1                                                                          | <i>Homo sapiens</i>                                                   |         |                                               |
| 136 | 0        | 47115241   | [emb] | CAG28580.1     | PRDX1                                                                                  | <i>Homo sapiens</i>                                                   |         |                                               |
| 137 | 0        | 54696346   | [gb]  | AAV38545.1     | peroxidoxin 1                                                                          | <i>Homo sapiens</i>                                                   |         |                                               |
| 138 | 0        | 82583658   | [gb]  | ABB84465.1     | peroxidoxin 1                                                                          | <i>Homo sapiens</i>                                                   |         |                                               |
| 139 | 0        | 119627380  | [gb]  | EAX06975.1     | peroxidoxin 1, isoform CRA a                                                           | <i>Homo sapiens</i>                                                   |         |                                               |
| 140 | 0        | 119627381  | [gb]  | EAX06976.1     | peroxidoxin 1, isoform CRA a                                                           | <i>Homo sapiens</i>                                                   |         |                                               |
| 141 | 0        | 119627383  | [gb]  | EAX06978.1     | peroxidoxin 1, isoform CRA a                                                           | <i>Homo sapiens</i>                                                   |         |                                               |
| 142 | 0        | 119627384  | [gb]  | EAX06979.1     | peroxidoxin 1, isoform CRA a                                                           | <i>Homo sapiens</i>                                                   |         |                                               |
| 143 | 0        | 119627385  | [gb]  | EAX06980.1     | peroxidoxin 1, isoform CRA a                                                           | <i>Homo sapiens</i>                                                   |         |                                               |

|           |          |            |                                |                                                           |                                                |  |         |  |  |                                              |
|-----------|----------|------------|--------------------------------|-----------------------------------------------------------|------------------------------------------------|--|---------|--|--|----------------------------------------------|
| 119627386 | gb       | EAX06981.1 | peroxidorexin 1, isoform GRA_a | Homo sapiens                                              |                                                |  |         |  |  |                                              |
| 119627387 | gb       | EAX06982.1 | peroxidorexin 1, isoform GRA_a | Homo sapiens                                              |                                                |  |         |  |  |                                              |
| 123929295 | gb       | ABM84099.1 | peroxidorexin 1                | synthetic construct                                       |                                                |  |         |  |  |                                              |
| 123999929 | gb       | ABM87471.1 | peroxidorexin 1                | synthetic construct                                       |                                                |  |         |  |  |                                              |
| 128       | 0        | 17546365   | NP_519767.1                    | PUTATIVE ALKYL HYDROPEROXIDE REDUCTASE                    | Ralstonia solanacearum GMI1000                 |  | group 3 |  |  | YFYPKDFTFVCPTEVLGVKLAWRREHKAGVALRAVSNRAVG    |
| 127       | 0        | 17428662   | embI_CAD15348                  | putative alky hydroperoxidase (subunit c) ox              | Ralstonia solanacearum                         |  | group 1 |  |  | FFYPLDFTFVCPTEVSHLAWVQTDRAAGLVLIQGIALRG      |
| 128       | 0        | 148242337  | ref                            | unknown                                                   |                                                |  | group 1 |  |  | FFYPLDFTFVCPTEVLGVDSHSLAWIQTERQGGIGEVALRG    |
| 129       | 3.17E-12 | 116511196  | ref                            | Peroxidorexin, AhpC/TSA family                            | Synechococcus sp. RCC-307                      |  | group 2 |  |  | VSDCFYPADFVFCPTTEVHAHVHDSVLDAGLAQRGADGIG     |
| 130       | 0        | 79489993   | ref                            | Peroxidorexin                                             | Lactococcus lactis subsp. cremoris SK11        |  | group 1 |  |  | VLLVSFFYPDLDFVCPTEVTHLAWINTPRQGGGLSGHTLRG    |
|           |          | 2104955    | gb                             | antioxidant enzyme AOE372                                 | Mus musculus                                   |  |         |  |  |                                              |
|           |          | 12636669   | tbl                            | unnamed protein product                                   | Mus musculus                                   |  |         |  |  |                                              |
|           |          | 13097150   | gb                             | Peroxidorexin 4                                           | Mus musculus                                   |  |         |  |  |                                              |
|           |          | 18044557   | gb                             | Peroxidorexin 4                                           | Mus musculus                                   |  |         |  |  |                                              |
|           |          | 74138647   | tbl                            | unnamed protein product                                   | Mus musculus                                   |  |         |  |  |                                              |
|           |          | 74212680   | tbl                            | unnamed protein product                                   | Mus musculus                                   |  |         |  |  |                                              |
| 131       | 0        | 46114676   | ref                            | hypothetical protein FG03180.1                            | Gibberella zeae PH-1                           |  | group 1 |  |  | LFYPMDFTFVCPTEVSTTHLAWWEKPRQGGGLVLIQGIALRG   |
| 132       | 3.42E-21 | 148707940  | gb                             | mCG128264                                                 | Mus musculus                                   |  | group 1 |  |  | FFYPLDITFVCPTEVSVTHQAWINTSREGGLVLEKGIAYRGR   |
| 133       | 0        | 149693696  | ref                            | PREDICTED: similar to spermogenesis specific trans        | Equus caballus                                 |  | group 1 |  |  | FFYPLDFTFVCPTEVSDSCHLAWINTPKQGGGLVLEKGISFRG  |
| 134       | 2.99E-16 | 11192293   | gb                             | AAG30570.1                                                | Brassica napus                                 |  | group 1 |  |  | VLLFLYPLDFTFVCPTEVSVSHLAWVQTERSGGLGGIALLRG   |
| 135       | 0        | 5802974    | ref                            | peroxidorexin 3 isoform a precursor                       | Homo sapiens                                   |  | group 1 |  |  | FFYPLDFTFVCPTEVSVSHLAWINTPRNCGGLVLLSGLALRG   |
|           |          | 114633015  | ref                            | PREDICTED: peroxidorexin 3 isoform 3                      | Pan troglodytes                                |  |         |  |  |                                              |
|           |          | 2607171    | tbl                            | PRDX3_HUMAN Thiooxidin-dependent peroxidase red           | Homo sapiens                                   |  |         |  |  |                                              |
|           |          | 682748     | tbl                            | Aop1 Human_MER5(Aop1 Mouse)like protein                   | Homo sapiens                                   |  |         |  |  |                                              |
|           |          | 12803699   | tbl                            | peroxidorexin 3                                           | Homo sapiens                                   |  |         |  |  |                                              |
|           |          | 13937905   | tbl                            | peroxidorexin 3                                           | Homo sapiens                                   |  |         |  |  |                                              |
|           |          | 16307049   | tbl                            | peroxidorexin 3                                           | Homo sapiens                                   |  |         |  |  |                                              |
|           |          | 18203823   | tbl                            | peroxidorexin 3                                           | Homo sapiens                                   |  |         |  |  |                                              |
|           |          | 18490861   | tbl                            | peroxidorexin 3                                           | Homo sapiens                                   |  |         |  |  |                                              |
|           |          | 37747400   | tbl                            | peroxidorexin 3                                           | Homo sapiens                                   |  |         |  |  |                                              |
|           |          | 47496635   | tbl                            | PRDX3                                                     | Homo sapiens                                   |  |         |  |  |                                              |
|           |          | 54696876   | tbl                            | peroxidorexin 3                                           | Homo sapiens                                   |  |         |  |  |                                              |
|           |          | 61356647   | tbl                            | peroxidorexin 3                                           | synthetic construct                            |  |         |  |  |                                              |
|           |          | 82583664   | tbl                            | peroxidorexin 3                                           | Homo sapiens                                   |  |         |  |  |                                              |
|           |          | 114205468  | tbl                            | peroxidorexin 3                                           | Homo sapiens                                   |  |         |  |  |                                              |
|           |          | 119569782  | tbl                            | peroxidorexin 3, isoform GRA_b                            | Homo sapiens                                   |  |         |  |  |                                              |
|           |          | 119569784  | tbl                            | peroxidorexin 3, isoform GRA_b                            | Homo sapiens                                   |  |         |  |  |                                              |
| 136       | 3.98E-19 | 15838131   | ref                            | subunit C of alkyl hydroperoxide reductase                | Xyella fastidiosa 985c                         |  | group 2 |  |  | VLKVFYPADFTFVCPTEVSTSHKAWHIDSPSGLADRGAEIG    |
|           |          | 9706568    | tbl                            | AE003983_1 subunit C of alkyl hydroperoxide reducta       | Xyella fastidiosa 985c                         |  | group 3 |  |  | MLGIVSAFFYPKDFTFVCPTEVSKLAWRRDHKEGVAIVYVLK   |
| 137       | 0        | 149125796  | ref                            | alkyl hydroperoxide reductase/ Thiol specific antioxidant | Methylobacterium sp. 4-46                      |  | group 2 |  |  | FFYPADFTFVCPTEISTVHKAWHDTSEVMIDGMGAERGAIVG   |
|           |          | 148517542  | tbl                            | alkyl hydroperoxide reductase/ Thiol specific antioxidant | Methylobacterium sp. 4-46                      |  | group 4 |  |  | FFYPKDFTFVCPTECCSVTHQQWLATKKGGIEVLEKEELSFRRG |
| 138       | 0        | 16094928   | tbl                            | hypothetical protein CLOJ250_02478                        | Clostridium sp. L2-50                          |  |         |  |  |                                              |
|           |          | 166863359  | tbl                            | hypothetical protein CLOJ250_02478                        | Clostridium sp. L2-50                          |  |         |  |  |                                              |
| 139       | 3.40E-15 | 15818687   | ref                            | Thio-specific Antioxidant (TSA) Peroxidase                | Chlamydomonas reinhardtii CWT029               |  |         |  |  |                                              |
|           |          | 15836311   | tbl                            | thio-specific antioxidant (TSA) peroxidase                | Chlamydomonas reinhardtii J138                 |  |         |  |  |                                              |
|           |          | 33242137   | tbl                            | 2-cys peroxidorexin BAS1 precursor                        | Chlamydomonas reinhardtii TW-183               |  |         |  |  |                                              |
|           |          | 4377087    | tbl                            | Thio-specific Antioxidant (TSA) Peroxidase                | Chlamydomonas reinhardtii CWT029               |  |         |  |  |                                              |
|           |          | 8979151    | tbl                            | thio-specific antioxidant (TSA) peroxidase                | Chlamydomonas reinhardtii J138                 |  |         |  |  |                                              |
|           |          | 33236647   | tbl                            | 2-cys peroxidorexin BAS1 precursor                        | Chlamydomonas reinhardtii TW-183               |  |         |  |  |                                              |
| 140       | 5.99E-21 | 123437476  | ref                            | trypanaredoxin peroxidase, putative                       | Trichomonas vaginalis G3                       |  | group 1 |  |  | FSYPLDFTFVCPTEVLGVDSHSLAWQNTIPREGGLGEHTLRG   |
|           |          | 121891402  | tbl                            | trypanaredoxin peroxidase, putative                       | Trichomonas vaginalis G3                       |  | group 3 |  |  | KATVAVSNFFWPKDFTFVCPTEVHLAWRNQHPQVQRAVL      |
| 141       | 0        | 54295192   | ref                            | hypothetical protein ip2272                               | Legionella pneumophila str. Lens               |  | group 2 |  |  | FFYPADFTFVCPTEVSTTHKAWHSTSEEGLADRGAEIGVGGK   |
|           |          | 53755024   | tbl                            | hypothetical protein                                      | Legionella pneumophila str. Lens               |  | group 1 |  |  | FFYPLDFTFVCPTECCSTAHLQWTLQDRKGGGLVLAQGVAYRGR |
| 142       | 0        | 50122862   | ref                            | alkyl hydroperoxide reductase subunit C                   | Erwinia carotovora subsp. atroseptica SCRI1043 |  | group 4 |  |  | VGKFWYPKDFTFVCPTECCSVHFAWLNTAKRNGGIEDNVTYRA  |
|           |          | 49615388   | tbl                            | alkyl hydroperoxide reductase C22 protein                 | Erwinia carotovora subsp. atroseptica SCRI1043 |  | group 2 |  |  | VLGFYFPADFTFVCPTEVSCVHKAWHDANEDGMGAERGNWTFPG |
| 143       | 0        | 145411494  | tbl                            | cytoplasmic trypanaredoxin peroxidase                     | Leishmania donovani                            |  | group 1 |  |  | VLGFYFPKDFTFVCPSESHFAWKNTPVQGGIGEVAVALRGVDT  |
| 144       | 5.53E-16 | 83856666   | tbl                            | putative thioethoxin peroxidase                           | Crceobacter atlanticus HTCC2559                |  | group 1 |  |  |                                              |
|           |          | 83850466   | tbl                            | putative thioethoxin peroxidase                           | Crceobacter atlanticus HTCC2559                |  | group 4 |  |  |                                              |
| 145       | 0        | 23336373   | tbl                            | COG0450: Peroxidorexin                                    | Bifidobacterium longum DJO10A                  |  | group 2 |  |  |                                              |
| 146       | 0        | 15791702   | ref                            | alkyl hydroperoxide reductase                             | Campylobacter jejuni subsp. jejuni NCTC 11168  |  | group 1 |  |  |                                              |
|           |          | 86149230   | tbl                            | antioxidant, AhpC/Tsa family                              | Campylobacter jejuni subsp. jejuni CF93-6      |  |         |  |  |                                              |
|           |          | 86151190   | tbl                            | antioxidant, AhpC/Tsa family                              | Campylobacter jejuni subsp. jejuni 260/94      |  |         |  |  |                                              |
|           |          | 86153707   | tbl                            | alkyl hydroperoxide reductase                             | Campylobacter jejuni subsp. jejuni HB93-13     |  |         |  |  |                                              |
|           |          | 88697454   | tbl                            | antioxidant, AhpC/Tsa family                              | Campylobacter jejuni subsp. jejuni 84-25       |  |         |  |  |                                              |
|           |          | 121613748  | tbl                            | antioxidant, AhpC/Tsa family                              | Campylobacter jejuni subsp. jejuni 81-176      |  |         |  |  |                                              |
|           |          | 148926429  | tbl                            | alkyl hydroperoxide reductase                             | Campylobacter jejuni subsp. jejuni CG8486      |  |         |  |  |                                              |

|     |           |           |                |                                           |                                                                       |                                                     |         |
|-----|-----------|-----------|----------------|-------------------------------------------|-----------------------------------------------------------------------|-----------------------------------------------------|---------|
|     | 153951156 | ref       | YP_001398615.1 | antioxidant, AhpC/1 sa family             | Campylobacter jejuni subsp. doylei 269.97                             |                                                     |         |
|     | 157414631 | ref       | YP_001481887.1 | alkyl hydroperoxidase reductase           | Campylobacter jejuni subsp. jejuni 811.16                             |                                                     |         |
|     | 4102824   | gb        | AAO02323.1     | alkyl hydroperoxidase reductase subunit C | Campylobacter jejuni                                                  |                                                     |         |
|     | 57166169  | gb        | AAV04966.1     | antioxidant, AhpC/1 sa family             | Campylobacter jejuni RM1221                                           |                                                     |         |
|     | 85840588  | gb        | EAQ37645.1     | antioxidant, AhpC/1 sa family             | Campylobacter jejuni subsp. jejuni CF93-6                             |                                                     |         |
|     | 85841537  | gb        | EAQ38784.1     | antioxidant, AhpC/1 sa family             | Campylobacter jejuni subsp. jejuni 260.94                             |                                                     |         |
|     | 85842668  | gb        | EAQ39880.1     | alkyl hydroperoxidase reductase           | Campylobacter jejuni subsp. jejuni HB93-13                            |                                                     |         |
|     | 87250100  | gb        | EAQ73058.1     | antioxidant, AhpC/1 sa family             | Campylobacter jejuni subsp. jejuni 81-176                             |                                                     |         |
|     | 88190515  | gb        | EAQ94489.1     | antioxidant, AhpC/1 sa family             | Campylobacter jejuni subsp. jejuni 84-25                              |                                                     |         |
|     | 112359699 | emb       | CAI34485.1     | alkyl hydroperoxidase reductase           | Campylobacter jejuni subsp. jejuni NCTC 11188                         |                                                     |         |
|     | 145844592 | gb        | EDK21698.1     | alkyl hydroperoxidase reductase           | Campylobacter jejuni subsp. jejuni CG8486                             |                                                     |         |
|     | 152938602 | gb        | ABS43343.1     | antioxidant, AhpC/1 sa family             | Campylobacter jejuni subsp. doylei 269.97                             |                                                     |         |
|     | 157385595 | gb        | ABV51910.1     | alkyl hydroperoxidase reductase           | Campylobacter jejuni subsp. jejuni 811.16                             |                                                     |         |
| 147 | 1.02E-14  | 165939898 | gdb            | EDR25705.1                                | hypothetical protein, conserved                                       | Entamoeba dispar SAW760                             | group 1 |
| 148 | 0         | 146310803 | ref            | YP_001175677.1                            | alkyl hydroperoxidase reductase subunit C                             | Enterobacter sp. 638                                | group 2 |
|     |           | 145317679 | gb             | ABP59826.1                                | antioxidant, AhpC/1 sa family                                         | Enterobacter sp. 638                                |         |
| 149 | 0         | 15616228  | ref            | NP_243531.1                               | alkyl hydroperoxidase reductase                                       | Bacillus halodurans C-125                           | group 1 |
|     |           | 10175286  | djbi           | BAB06384.1                                | 2-cys peroxidorefin                                                   | Bacillus halodurans C-125                           |         |
| 150 | 0         | 47499100  | gb             | AA128331.1                                | peroxidorefin                                                         | Haemophilus contortus                               | group 1 |
| 151 | 0         | 145515131 | ref            | XP_001443486.1                            | hypothetical protein, CSPATT00039111001                               | Paramacium tetraurelia strain d4-2                  | group 1 |
|     |           | 124410851 | emb            | CAK76071.1                                | unnamed protein product                                               | Paramacium tetraurelia                              |         |
| 152 | 0         | 118485938 | gb             | ABK94814.1                                | unknown                                                               | Populus trichocarpa                                 | group 1 |
| 153 | 0         | 109090694 | ref            | XP_001097349.1                            | PREDICTED: peroxidorefin 3 isoform 2                                  | Macaca mulatta                                      | group 1 |
| 154 | 5.71E-15  | 912036333 | emb            | CAJ71286.1                                | strongly similar to peroxidorefin (thioredoxin peroxidase)            | Candidatus Kueneia stultipatiensis AhpE (7.331E-09) | group 1 |
| 155 | 0         | 157960574 | ref            | YP_001500608.1                            | alkyl hydroperoxidase reductase/Thiol specific antioxidant            | Shewanella pealeana ATCC 700345                     | group 2 |
|     |           | 157846574 | gb             | ABV86073.1                                | alkyl hydroperoxidase reductase/Thiol specific antioxidant            | Shewanella pealeana ATCC 700345                     |         |
| 156 | 0         | 114052210 | ref            | NP_001040464.1                            | thioredoxin peroxidase                                                | Bombyx mori                                         | group 1 |
|     |           | 95102938  | gb             | ABF51440.1                                | thioredoxin peroxidase                                                | Bombyx mori                                         |         |
| 157 | 0         | 52630979  | gb             | AAU84951.1                                | thioredoxin peroxidase                                                | Branchiostoma belcheri isingtaunense                | group 1 |
| 158 | 0         | 118084003 | ref            | XP_001234000.1                            | PREDICTED: similar to MGCC82793, protein isoform 1                    | Gallus gallus                                       | group 1 |
| 159 | 0         | 90425915  | ref            | YP_534285.1                               | alkyl hydroperoxidase reductase/Thiol specific antioxidant            | Rhodospirillum rubrum DSM 9818                      | group 1 |
|     |           | 90170729  | gb             | ABD89966.1                                | alkyl hydroperoxidase reductase/Thiol specific antioxidant            | Rhodospirillum rubrum DSM 9818                      |         |
| 160 | 0         | 149185222 | ref            | YP_01786338.1                             | alkyl hydroperoxidase reductase (small subunit)                       | Erythrobacter sp. SD-21                             | group 2 |
|     |           | 148830742 | gb             | EDL49177.1                                | alkyl hydroperoxidase reductase (small subunit)                       | Erythrobacter sp. SD-21                             |         |
| 161 | 7.56E-14  | 68473826  | ref            | XP_716082.1                               | putative thioredoxin peroxidase                                       | Candida albicans SC5314                             | group 1 |
|     |           | 13959614  | sp             | G9V7F0                                    | TS-A1 CANAL Peroxidorefin TSA1 (Thioredoxin peroxidase)               | Candida albicans                                    |         |
|     |           | 4929489   | gb             | AAJ34017.1                                | alkyl hydroperoxidase reductase                                       | Candida albicans                                    |         |
|     |           | 46437733  | gb             | EAK97074.1                                | alkyl thioredoxin peroxidase                                          | Candida albicans SC5314                             |         |
| 162 | 0         | 71408703  | ref            | XP_806739.1                               | trypanosoma cruzi strain CL Brener                                    | Trypanosoma cruzi                                   | group 1 |
|     |           | 70870571  | gb             | EAN84888.1                                | trypanosoma cruzi                                                     | Trypanosoma cruzi                                   |         |
| 163 | 0         | 28188631  | djbi           | BAC56430.1                                | similar to peroxidorefin 1                                            | Bos taurus                                          | group 1 |
| 164 | 0         | 154252753 | ref            | YP_001413577.1                            | alkyl hydroperoxidase reductase/Thiol specific antioxidant            | Parvabaculum lavamentivorans DS-1                   | group 1 |
|     |           | 154156703 | gb             | ABS59320.1                                | alkyl hydroperoxidase reductase/Thiol specific antioxidant            | Parvabaculum lavamentivorans DS-1                   |         |
| 165 | 0         | 87203670  | ref            | YP_01086445.1                             | thioredoxin peroxidase                                                | Synechococcus sp. WH 5701                           | group 1 |
|     |           | 87281775  | gb             | EAQ73740.1                                | thioredoxin peroxidase                                                | Synechococcus sp. WH 5701                           |         |
| 166 | 7.54E-18  | 32140413  | gb             | AAPE8994.1                                | thiol-specific antioxidant protein 1                                  | Cytophobus neoflorens var. grubii                   | group 1 |
| 167 | 0         | 125979671 | ref            | XP_001363868.1                            | GA11781-PA                                                            | Drosophila pseudoobscura AhpE (8.878E-09)           | group 1 |
|     |           | 54640852  | gb             | EAL29603.1                                | GA11781-PA                                                            | Drosophila pseudoobscura                            |         |
| 168 | 3.20E-16  | 89891653  | ref            | YP_01203157.1                             | thioredoxin peroxidase                                                | Flavobacteria bacterium BBFL7                       | group 4 |
|     |           | 89516200  | gb             | EAS18863.1                                | thioredoxin peroxidase                                                | Flavobacteria bacterium BBFL7                       |         |
| 169 | 0         | 163844838 | ref            | YP_001622493.1                            | hypothetical protein BSUIJS_B0694                                     | Brucella suis ATCC 23445                            | group 3 |
|     |           | 163676561 | gb             | ABY39671.1                                | hypothetical protein, conserved                                       | Brucella suis ATCC 23445                            |         |
| 170 | 0         | 82238134  | sp             | G6DV14                                    | PRDX1_GECJIA Peroxidorefin-1                                          | Gekko japonicus                                     | group 1 |
|     |           | 49659835  | gb             | AA1168217.1                               | GENB5014P                                                             | Gekko japonicus                                     |         |
|     |           | 50881958  | gb             | AA185554.1                                | BS003P                                                                | Gekko japonicus                                     |         |
| 171 | 0         | 149042395 | gb             | EDL96102.1                                | peroxidorefin 4, isoform CRA_a                                        | Rattus norvegicus                                   | group 1 |
| 172 | 0         | 78212854  | ref            | YP_381633.1                               | thioredoxin peroxidase                                                | Synechococcus sp. CC9605                            | group 1 |
|     |           | 78197313  | gb             | AB83076.1                                 | thioredoxin peroxidase                                                | Synechococcus sp. CC9605                            |         |
| 173 | 7.46E-18  | 90022452  | ref            | YP_528279.1                               | alkyl hydroperoxidase reductase, C subunit                            | Saccharophagus degradans 2-40                       | group 2 |
|     |           | 89952052  | gb             | ABD82067.1                                | alkyl hydroperoxidase reductase/Thiol specific antioxidant            | Saccharophagus degradans 2-40                       |         |
| 174 | 0         | 21307665  | gb             | AAK58478.1                                | thiol-specific antioxidant protein                                    | Leishmania infantum                                 | group 1 |
| 175 | 0         | 50083688  | ref            | YP_045198.1                               | alkyl hydroperoxidase reductase protein                               | Acinetobacter sp. ADP1                              | group 2 |
|     |           | 49529664  | emb            | CA567376.1                                | alkyl hydroperoxidase reductase, C22 subunit, thioredoxin             | Acinetobacter sp. ADP1                              |         |
| 176 | 0         | 84362113  | ref            | YP_00986749.1                             | COG0450: Peroxidorefin                                                | Burkholderia dolosa AU0168                          | group 3 |
|     |           | 124694750 | gb             | EAY8650.1                                 | Peroxidorefin                                                         | Burkholderia dolosa AU0168                          |         |
| 177 | 0         | 77359788  | ref            | YP_339363.1                               | peroxidorefin 2 (Thioredoxin peroxidase 1) (Thioredoxin peroxidase 2) | Pseudoalteromonas haloplanktis TAC125               | group 1 |
|     |           | 76874699  | emb            | CA185920.1                                | peroxidorefin 2 (Thioredoxin peroxidase 1) (Thioredoxin peroxidase 2) | Pseudoalteromonas haloplanktis TAC125               |         |
| 178 | 0         | 163748434 | ref            | ED02155688.1                              | alkyl hydroperoxidase reductase, C subunit                            | Shewanella benthica KT99                            | group 2 |
|     |           | 161332012 | gb             | ED002689.1                                | alkyl hydroperoxidase reductase, C subunit                            | Shewanella benthica KT99                            |         |
| 179 | 0         | 125539760 | gb             | EAY86175.1                                | hypothetical protein Os_007408                                        | Oryza sativa (indica cultivar-group)                | group 1 |
| 180 | 0         | 54507930  | ref            | YP_128950.1                               | putative antioxidant, AhpC/1sa family                                 | Photobacterium profundum SS9                        | group 1 |

|     |           |           |     |                |                                                                        |                                                     |         |                                                |
|-----|-----------|-----------|-----|----------------|------------------------------------------------------------------------|-----------------------------------------------------|---------|------------------------------------------------|
| 181 | 0         | 113954600 | emb | CAG191483.1    | putative antioxidant, AhpC/Tsa family                                  | Photobacterium profundum SS9                        | group 1 | FFYPLDFTFVCPTEVLGSHLAWIQARQQGGIGISTEGVALRG     |
| 182 | 0         | 113981951 | gb  | AB146909.1     | thioredoxin peroxidase                                                 | Synechococcus sp. Cc9311                            | group 1 | VTKFFYPDRDFTFVCPTEISTAHSHWRNTP1KGGIGGKVS1LRG   |
| 183 | 0         | 88598246  | gb  | ABD43716.1     | antioxidant, AhpC/Tsa family                                           | Anaplasma phagocytophilum HZ                        | group 1 | YFYPDLDFVCPSECVTHLAWKKTPLKGGIGDSVSLRAVLI       |
| 184 | 0         | 110590544 | gb  | 2H66           | A Chain A. The Crystal Structure Of Plasmodium Vivax Plasmodium vivax  | Plasmodium vivax                                    | group 1 |                                                |
| 185 | 0         | 110590545 | gb  | 2H66           | B Chain B. The Crystal Structure Of Plasmodium Vivax Plasmodium vivax  | Plasmodium vivax                                    | group 1 |                                                |
| 186 | 0         | 110590546 | gb  | 2H66           | C Chain C. The Crystal Structure Of Plasmodium Vivax Plasmodium vivax  | Plasmodium vivax                                    | group 1 |                                                |
| 187 | 0         | 110590547 | gb  | 2H66           | D Chain D. The Crystal Structure Of Plasmodium Vivax Plasmodium vivax  | Plasmodium vivax                                    | group 1 |                                                |
| 188 | 0         | 110590548 | gb  | 2H66           | E Chain E. The Crystal Structure Of Plasmodium Vivax Plasmodium vivax  | Plasmodium vivax                                    | group 1 |                                                |
| 189 | 0         | 110590549 | gb  | 2H66           | F Chain F. The Crystal Structure Of Plasmodium Vivax Plasmodium vivax  | Plasmodium vivax                                    | group 1 |                                                |
| 190 | 0         | 110590550 | gb  | 2H66           | G Chain G. The Crystal Structure Of Plasmodium Vivax Plasmodium vivax  | Plasmodium vivax                                    | group 1 |                                                |
| 191 | 0         | 110590551 | gb  | 2H66           | H Chain H. The Crystal Structure Of Plasmodium Vivax Plasmodium vivax  | Plasmodium vivax                                    | group 1 |                                                |
| 192 | 0         | 110590562 | gb  | 2H66           | I Chain I. The Crystal Structure Of Plasmodium Vivax Plasmodium vivax  | Plasmodium vivax                                    | group 1 |                                                |
| 193 | 0         | 110590563 | gb  | 2H66           | J Chain J. The Crystal Structure Of Plasmodium Vivax Plasmodium vivax  | Plasmodium vivax                                    | group 1 |                                                |
| 194 | 0         | 116688043 | gb  | 2181           | A Chain A. Crystal Structure Of Plasmodium Vivax 2-CP Plasmodium vivax | Plasmodium vivax                                    | group 1 |                                                |
| 195 | 0         | 116688044 | gb  | 2181           | B Chain B. Crystal Structure Of Plasmodium Vivax 2-CP Plasmodium vivax | Plasmodium vivax                                    | group 1 |                                                |
| 196 | 0         | 116688045 | gb  | 2181           | C Chain C. Crystal Structure Of Plasmodium Vivax 2-CP Plasmodium vivax | Plasmodium vivax                                    | group 1 |                                                |
| 197 | 0         | 116688046 | gb  | 2181           | D Chain D. Crystal Structure Of Plasmodium Vivax 2-CP Plasmodium vivax | Plasmodium vivax                                    | group 1 |                                                |
| 198 | 0         | 116688047 | gb  | 2181           | E Chain E. Crystal Structure Of Plasmodium Vivax 2-CP Plasmodium vivax | Plasmodium vivax                                    | group 1 |                                                |
| 199 | 0         | 113931849 | ref | ZP_01417751.1  | Alkyl hydroperoxide reductase/ Thiol specific antioxidant              | Caulobacter sp. K31                                 | group 2 | FFYPADFTFVCPTEVSTAHHKAWHDTSDVMIAGLADRAGGIG     |
| 200 | 0         | 113732070 | gb  | EAU13138.1     | Alkyl hydroperoxide reductase/ Thiol specific antioxidant              | Caulobacter sp. K31                                 | group 2 |                                                |
| 201 | 0         | 83647673  | ref | YP_436108.1    | Peroxioredoxin                                                         | Hahella chejuensis KC1C 2336                        | group 1 | VLVFFYPDLDFVCPSEVSIHNAWRNTPVKGGIGGGVAFRG       |
| 202 | 0         | 83635716  | gb  | AB_C31883.1    | Peroxioredoxin                                                         | Hahella chejuensis KC1C 2336                        | group 1 |                                                |
| 203 | 0         | 145846200 | ref | XP_001439781.1 | hypothetical protein GSPA1T00025118001                                 | Parametium tetraurelia strain d4-2                  | group 1 | FFYPLNFTFVCPTEVLGDGGLGISSSGLSIRG1IKPDIKSK      |
| 204 | 12.23E-12 | 124427607 | emb | CAK92384.1     | unnamed protein product                                                | Parametium tetraurelia                              | group 1 |                                                |
| 205 | 0         | 146306355 | ref | YP_001186820.1 | Peroxioredoxin                                                         | Pseudomonas mendocina ymp                           | group 2 | IFMPAAF1FNCPTESHKVVWHETSPVKGKEGLARAGEGQKVSE    |
| 206 | 0         | 145674556 | gb  | AB_P84086.1    | Peroxioredoxin                                                         | Pseudomonas mendocina ymp                           | group 2 |                                                |
| 207 | 0         | 90022075  | ref | YP_527902.1    | response regulator receiver domain protein (CheY-like)                 | Saccharophagus degradans 2-40                       | group 1 | VLVFFYPDLDFVCPSEVSIHNAWRNTPVEGGIGGGVAFRG       |
| 208 | 0         | 89951675  | gb  | ABD81690.1     | alkyl hydroperoxide reductase/ Thiol specific antioxidant              | Saccharophagus degradans 2-40                       | group 1 | YFYPKDFTFVCPTEVLLVKLAWRREHPAGVALRAVSVNRTYVG    |
| 209 | 0         | 115492149 | emb | CAJ48673.1     | alkyl hydroperoxide reductase                                          | Bordetella avium 197N                               | group 3 | FFYPLDFTFVCPTEVSVTHLAWINTPREGGLGVLKREGIAYRG    |
| 210 | 0         | 75070821  | sp  | Q5R0C63        | PRDX2_PONPY Peroxioredoxin-2                                           | Pongo pygmaeus                                      | group 1 |                                                |
| 211 | 0         | 55727787  | emb | CAH90647.1     | hypothetical protein                                                   | Pongo pygmaeus                                      | group 1 |                                                |
| 212 | 0         | 54696872  | gb  | AAV38806.1     | peroxiredoxin 3                                                        | synthetic construct                                 | group 1 | FFYPLDFTFVCPTEVSVTHLAWINTPRNGGLGVLLSGLALRG     |
| 213 | 0         | 54696874  | gb  | AAV38809.1     | peroxiredoxin 3                                                        | synthetic construct                                 | group 1 |                                                |
| 214 | 0         | 61366442  | gb  | AAAX42860.1    | peroxiredoxin 3                                                        | synthetic construct                                 | group 1 |                                                |
| 215 | 0         | 61366450  | gb  | AAAX42861.1    | peroxiredoxin 3                                                        | synthetic construct                                 | group 1 |                                                |
| 216 | 0         | 164608828 | gb  | ABY62745.1     | thioredoxin peroxidase                                                 | Artemia franciscana                                 | group 1 | FFYPLDFTFVCPTECSTSHFVWINTPRQGGIYVAKKEGVTRFR    |
| 217 | 0         | 149589559 | ref | XP_001509414.1 | PREDICTED: similar to LOC496089 protein, partial                       | Omithorhynchus anatinus                             | group 1 | FFYPLDFTFVCPTECVTHLAWINTPRQGGIYVAKKEGVTRFR     |
| 218 | 0         | 148747568 | ref | NP_0356933.3   | peroxiredoxin 2                                                        | Mus musculus                                        | group 1 | FFYPLDFTFVCPTEVSVTHLAWINTPREGGLGVLKREGIAYRG    |
| 219 | 0         | 24994689  | sp  | Q61171         | PRDX2_MOUSE Peroxioredoxin-2 (Thioredoxin peroxidase)                  | Mus musculus                                        | group 1 |                                                |
| 220 | 0         | 1354328   | gb  | AA801941.1     | thioredoxin peroxidase                                                 | Mus musculus                                        | group 1 |                                                |
| 221 | 0         | 1568575   | emb | CAA97566.1     | putative TSA, thiol specific antioxidant                               | Mus musculus                                        | group 1 |                                                |
| 222 | 0         | 12805153  | gb  | AAH02034.1     | Prdx2 protein                                                          | Mus musculus                                        | group 1 |                                                |
| 223 | 0         | 12842613  | dbl | BAB25666.1     | unnamed protein product                                                | Mus musculus                                        | group 1 |                                                |
| 224 | 0         | 26353250  | dbl | BAC40255.1     | unnamed protein product                                                | Mus musculus                                        | group 1 |                                                |
| 225 | 0         | 51980699  | gb  | AAH61454.1     | Prdx2 protein                                                          | Mus musculus                                        | group 1 |                                                |
| 226 | 0         | 148679031 | gb  | EDL10978.1     | mCG5911                                                                | Mus musculus                                        | group 1 |                                                |
| 227 | 0         | 17554494  | ref | NP_497892.1    | PeRoXireDoXin family member (prdx-3)                                   | Caenorhabditis elegans                              | group 1 | FFYPLDFTFVCPTECSCSHLAWINTPRDGGLGSSGLSYRGLVK    |
| 228 | 0         | 3024728   | sp  | Q21824         | TDX1_CAEEL Probable peroxiredoxin prdx-3 (Thioredoxin)                 | Caenorhabditis elegans                              | group 1 |                                                |
| 229 | 0         | 3878943   | emb | CAA83619.1     | Hypothetical protein R07E5.2                                           | Caenorhabditis elegans                              | group 1 |                                                |
| 230 | 0         | 163856008 | ref | YP_001630306.1 | alkyl hydroperoxide reductase                                          | Bordetella pertussis                                | group 3 | YFYPKDFTFVCPTEVLLVKLAWRREHPHPEGVVALRAVSVNRTYVG |
| 231 | 0         | 163259736 | emb | CAF42037.1     | alkyl hydroperoxide reductase                                          | Bordetella pertussis                                | group 3 |                                                |
| 232 | 0         | 8394432   | ref | NP_058885.1    | peroxiredoxin 2                                                        | Rattus norvegicus                                   | group 1 | FFYPLDFTFVCPTEVSVTHLAWINTPREGGLGVLKREGIAYRG    |
| 233 | 0         | 549132    | sp  | P35704         | PRDX2_RAT Peroxioredoxin-2 (Thioredoxin peroxidase)                    | Rattus norvegicus                                   | group 1 |                                                |
| 234 | 0         | 514254    | gb  | AAA19559.1     | thiol-specific antioxidant                                             | Rattus norvegicus                                   | group 1 |                                                |
| 235 | 0         | 632720    | gb  | AA82034.1      | TSA=thiol-specific antioxidant rats_brain_Peptide_19                   | Photobacterium profundum SS9                        | group 1 | VLVFFYPDLDFVCPSEVSIHNAWRNTP1VDDGGIAGVAFRG      |
| 236 | 0         | 54309736  | ref | YP_130756.1    | putative antioxidant, AhpC/Tsa family                                  | Photobacterium profundum SS9                        | group 1 |                                                |
| 237 | 0         | 46914174  | emb | CA620954.1     | putative antioxidant, AhpC/Tsa family                                  | Photobacterium profundum SS9                        | group 1 | GSVFFYPADFSFVCPTEVHQAWHEQSAVAL1GQAYRGGQTVR     |
| 238 | 0         | 11633327  | ref | YP_794288.1    | Peroxioredoxin                                                         | Lactobacillus brevis ATCC 367                       | group 2 |                                                |
| 239 | 0         | 116098108 | gb  | AB_J63257.1    | Peroxioredoxin                                                         | Lactobacillus brevis ATCC 367                       | group 2 |                                                |
| 240 | 0         | 19703279  | ref | NP_602774.1    | Alkyl hydroperoxide reductase C22 protein                              | Fusobacterium nucleatum subsp. nucleatum ATCC 25586 | group 2 | VFYPADFTFVCPTEVSVHVKAWHADHSEVMIEGLALRGDNGIG    |
| 241 | 0         | 19713242  | gb  | AA194073.1     | Alkyl hydroperoxide reductase C22 protein                              | Fusobacterium nucleatum subsp. nucleatum ATCC 25586 | group 2 |                                                |
| 242 | 0         | 57168472  | ref | ZP_00367606.1  | antioxidant, AhpC/Tsa family V0731                                     | Campylobacter coli RM2228                           | group 1 | VLGFFYPKDFTFVCPSESHFAWKNTPVQGGIGEAVLRGVDI      |
| 243 | 0         | 57020280  | gb  | EAL58954.1     | antioxidant, AhpC/Tsa family V0731                                     | Campylobacter coli RM2228                           | group 1 |                                                |
| 244 | 0         | 359894    | emb | CAA06158.1     | thiol-specific antioxidant protein                                     | Fasciola hepatica                                   | group 1 | AFYPLDFTFVCPTECSTSHLQWTKMDRVGGIGIVLDQNTYRG     |
| 245 | 0         | 157828322 | ref | YP_001494564.1 | thioredoxin peroxidase 1                                               | Rickettsia rickettsii str. 'Sheila Smith'           | group 1 | VGKFFYPDLDFVCPSEVSVTHLAWINTPRKGGLGDGVALRG      |
| 246 | 0         | 16780803  | gb  | ABY76056.1     | thioredoxin peroxidase 1                                               | Rickettsia rickettsii str. 'Sheila Smith'           | group 1 |                                                |
| 247 | 0         | 2829135   | gb  | AAC32310.1     | peroxiredoxin-2                                                        | Onchocerca volvulus                                 | group 1 | FFYPLDFTFVCPTECSTSHLAWINTPRNGGLGVLKREGIAYRG    |
| 248 | 0         | 45826512  | gb  | AA57881.1      | peroxiredoxin                                                          | Acetobacter radioresistans                          | group 2 | FFYPADFTFVCPTEVSIHNAWRNTPVQGGIGVADRAGGIG       |

|     |          |            |     |                 |                                                                                                       |                                           |         |                                              |
|-----|----------|------------|-----|-----------------|-------------------------------------------------------------------------------------------------------|-------------------------------------------|---------|----------------------------------------------|
| 206 | 0        | 57506047   | ref | ZP_00371970.1   | antioxidant, AhpC/Tsa family, authentic frameshift                                                    | Campylobacter upsaliensis RM3195          | group 1 | VLGFFPKDFTFVCPSESHFAWKNKTIPIQGGIGEAVALRGVDT  |
| 207 | 0        | 57015655   | gb  | EAL52446.1      | antioxidant, AhpC/Tsa family, authentic frameshift                                                    | Campylobacter upsaliensis RM3195          | group 1 | FFYPLDFTFVCPTEVSVTHLAWINTPREGGLVILKEGIAYRG   |
| 208 | 0        | 73986497   | ref | XP_542042.2     | PREDICTED: similar to Peroxiredoxin 2 (Thioredoxin PREDICTED: similar to Peroxiredoxin 2 (Thioredoxin | Canis familiaris                          | group 3 | YFYPKDPSFLCPTLEMLMVKLAWRRELKFGDYKAGVALRAVSV  |
| 209 | 0        | 118044346  | ref | ZP_01513061.1   | alkyl hydroperoxide reductase/Thiol specific antioxidant/Burkholderia phytofirmans PsJN               | Burkholderia phytofirmans PsJN            | group 1 | FFYPLDFTFVCPTEVSVSHLAWIQSDRSRGGVGLDAGIALRG   |
| 210 | 0        | 11945657   | gb  | EAV02309.1      | alkyl hydroperoxide reductase/Thiol specific antioxidant/Burkholderia phytofirmans PsJN               | Burkholderia phytofirmans PsJN            | group 2 | IDVFFYPADFTFVCPTECHKAWHDTSKGLADRGAAGGIVGK    |
| 211 | 1.78E-17 | 149372512  | ref | ZP_01621253.1   | alkyl hydroperoxide reductase/Thiol specific antioxidant/Burkholderia phytofirmans PsJN               | Burkholderia phytofirmans PsJN            | group 4 | FWYPKDFTFVCPTEGDTVFHFAWLNTPKNGGIEVLVDNVTYRA  |
| 212 | 0        | 11945657   | gb  | EAV02309.1      | alkyl hydroperoxide reductase/Thiol specific antioxidant/Burkholderia phytofirmans PsJN               | Burkholderia phytofirmans PsJN            | group 1 | FFYPLDFTFVCPTEVLDVSDSHLAWIQTPRQGGIGEGVALRG   |
| 213 | 2.03E-11 | 134093319  | ref | YP_001098394.1  | alkyl hydroperoxide reductase/Thiol specific antioxidant/Synechococcus sp. WH 8102                    | Synechococcus sp. WH 8102                 | group 2 | JFMPPAFTFNCPTESHKHWHIETSPVKGKAGLALRGEVWIKYSE |
| 214 | 0        | 1134460621 | ref | YP_01891624.1   | alkyl hydroperoxide reductase/Thiol specific antioxidant/Tetradodon nigroviridis                      | Tetradodon nigroviridis                   | group 1 | NLKFYPMDFTFVCPSESVITHNAWRNTPVYVGGIGAGVALRA   |
| 215 | 0        | 112822684  | gb  | AB124753.1      | AhpC/Tsa family protein                                                                               | Haemophilus somnus 129P7                  | group 1 | AFYPLDFTFVCPTEKGAFLRRVLLTHKAWASIPRNVGLGISS   |
| 216 | 0        | 19168744   | emb | YP_597628.1     | THIOREDOXIN PEROXIDASE (THIOL-SPECIFIC AN                                                             | Haemophilus somnus 129P7                  | group 2 | LFYPADFTFVCPTEVSTTHKAWHDSSVMIAGLAERGAAGGIG   |
| 217 | 0        | 92394580   | ref | ABE175855.1     | alkyl hydroperoxide reductase/Thiol specific antioxidant/Synechococcus sp. WH 8102                    | Synechococcus sp. WH 8102                 | group 1 | FFYPLDFTFVCPTEVSHLAWIQSDRSRGGVGLDAGIALRG     |
| 218 | 0        | 116619551  | ref | YP_821707.1     | alkyl hydroperoxide reductase/Thiol specific antioxidant/Synechococcus sp. WH 8102                    | Synechococcus sp. WH 8102                 | group 3 | MLGVGFEPKDFTFVCPTEVGLVHHAWRTHHAEVGAQRAVSV    |
| 221 | 0        | 72382192   | ref | YP_291647.1     | thioredoxin peroxidase                                                                                | Solibacter salitatus Elin6076             | group 1 | FFYPLDFTFVCPTEVLDVSDSHLAWIQTPREGGIGDEADRGR   |
| 222 | 6.71E-12 | 58583268   | ref | YP_202284.1     | alkyl hydroperoxide reductase/Thiol specific antioxidant/Solibacter salitatus Elin6076                | Solibacter salitatus Elin6076             | group 2 | WSVIFMPAAFTFNCPTESHKHWHIETSPVKGKAGLALRGEVWIK |
| 223 | 0        | 84625104   | ref | YP_452476.1     | alkyl hydroperoxide reductase/Thiol specific antioxidant/Solibacter salitatus Elin6076                | Solibacter salitatus Elin6076             | group 1 | VLSFFYPLDFTFVCPTEISVSHYKWRNTPVDGIGDSIALRA    |
| 224 | 0        | 67083336   | gb  | AAV66603.1      | thioredoxin-dependent peroxide reductase                                                              | Xanthomonas oryzae pv. oryzae MAFF 311018 | group 1 | VLKFFYPLDFTFVCPTEVSVSHLAWINTPREGGIGLALRG     |
| 225 | 0        | 145936881  | ref | XP_001434430.1  | hypothetical protein GSPA1T00036186001                                                                | Paratubercium tetraurelia strain dh-2     | group 1 | FFYPLNFTFVCPTEVLDGGLGSSGLSIRGTHKPIEDKSK      |
| 226 | 0        | 149040547  | gb  | ED194585.1      | peroxiredoxin 3                                                                                       | Rattus norvegicus                         | group 1 | FFYPLDFTFVCPTEVSVSHLAWINTPREGGIGLALRG        |
| 227 | 1.07E-14 | 165900051  | gb  | EDR26500.1      | hypothetical protein, conserved                                                                       | Enhanoeba dispar SAW760                   | group 1 | LVFYPLDFTFVCPTEQLKVSCHQAWCEADKGGVGTGYSRRG    |
| 228 | 5.26E-14 | 165983771  | gb  | EDR2652.0       | hypothetical protein, conserved                                                                       | Enhanoeba dispar SAW760                   | group 1 | NVKLFYPLDFTFVCPTEVSVCHQAWCEADKGGVGTGYSRRG    |
| 229 | 7.16E-24 | 123459140  | ref | XP_001316602.1  | thioredoxin peroxidase, putative                                                                      | Trichomonas vaginalis G3                  | group 1 | FSYPLDFTFVCPTEVLDVSDSHLAWINTPREGGIGDGHILRG   |
| 230 | 0        | 49456297   | emb | CAG46469.1      | PRDX4                                                                                                 | Homo sapiens                              | group 1 | VDVFFYPLDFTFVCPTEVSHLAWINQPRHGGGLVLEKEGIAFRG |
| 231 | 0        | 157824511  | gb  | ABV82431.1      | Peroxiredoxin protein 2, isoform b                                                                    | Caenorhabditis elegans                    | group 1 | VLVFFYPLDFTFVCPSEVSIHNAWRNTPINGGIGAGVALRA    |
| 232 | 0        | 145636415  | ref | YP_01792083.1   | probable peroxiredoxin                                                                                | Haemophilus influenzae PIHGH              | group 1 | VLVFFYPLDFTFVCPTEVSHLAWINQPRHGGGLVLEKEGIAFRG |
| 233 | 1.62E-15 | 126132194  | ref | XP_001382622.1  | probable peroxiredoxin                                                                                | Haemophilus influenzae PIHGH              | group 1 | AFIPLAFTFVCPTEVSHLAWINQPRHGGGLVLEKEGIAFRG    |
| 234 | 0        | 4620747    | ref | ZP_00056418.2   | COG0450: Peroxiredoxin                                                                                | Magnetospirillum magnetotacticum MS-1     | group 1 | NLKFYPLDFTFVCPSEVSVTHLAWKNTPKVKGGLGGGVALRG   |
| 235 | 0        | 114797286  | ref | YP_761712.1     | alkyl hydroperoxide reductase C                                                                       | Hyphomonas neptunum ATCC 15444            | group 3 | MLGIGFFPKDFTFVCPTEGTSVTLAWRREHAGVAVRAVLD     |
| 236 | 0        | 54298970   | ref | YP_125339.1     | alkyl hydroperoxide reductase                                                                         | Hyphomonas neptunum ATCC 15444            | group 1 | VLVFFYPLDFTFVCPSEVSIHNAWRNTPVNGGIGAGVAFRRG   |
| 237 | 6.99E-20 | 56754885   | gb  | CAW14190.1      | alkyl hydroperoxide reductase                                                                         | Legionella pneumophila str. Paris         | group 1 | VFYPLDFTFVCPTECSTSHLAWTKLDRAAGLGNLKEGHAFRG   |
| 238 | 0        | 145628985  | ref | ZP_01784784.1   | uridine kinase                                                                                        | Schistosoma japonicum                     | group 1 | VLVFFYPLDFTFVCPSEVSIHNAWRNTPINGGIGAGVALRA    |
| 239 | 0        | 154149007  | ref | YP_01406657.1   | probable peroxiredoxin                                                                                | Haemophilus influenzae Pflit1             | group 1 | VLVFFYPLDFTFVCPSEVSIHNAWRNTPINGGIGAGVALRA    |
| 240 | 0        | 77459150   | ref | YP_348696.1     | 2-cys peroxiredoxin BAS1                                                                              | Haemophilus influenzae 22.1-21            | group 2 | FFYPADFTFVCPTEVSTVTAHAAWHNTSPVLAIGLADRDGGGVG |
| 241 | 0        | 9965598    | gb  | AAAT4866.1      | alkyl hydroperoxide reductase/Thiol specific antioxidant/Litomosoides sigmodontis                     | Litomosoides sigmodontis                  | group 1 | FFYPLDFTFVCPTECSTSHLAWNTDRMGGLVLDKGIAYRG     |
| 242 | 0        | 84393921   | ref | YP_00932663.1   | alkyl hydroperoxide reductase C22 protein                                                             | Vibrio splendidus 12B01                   | group 1 | VLVFFYPLDFTFVCPSEVSIHNAWRNTPINGGIGAGVAFRRG   |
| 243 | 0        | 148262378  | ref | YP_0012239084.1 | alkyl hydroperoxide reductase/Thiol specific antioxidant/Geobacter uraniumreducens R4                 | Geobacter uraniumreducens R4              | group 1 | FFYPLDFTFVCPSEVSVTHLAWKNTPVNNGGIGESVALRGAMIK |
|     |          | 146395878  | gb  | ABQ24511.1      | alkyl hydroperoxide reductase/Thiol specific antioxidant/Geobacter uraniumreducens R4                 | Geobacter uraniumreducens R4              | group 1 | FFYPLDFTFVCPSEVSVTHLAWKNTPVNNGGIGESVALRGAMIK |



|     |          |           |     |                |                                                                   |                                                     |         |                                                |
|-----|----------|-----------|-----|----------------|-------------------------------------------------------------------|-----------------------------------------------------|---------|------------------------------------------------|
| 244 | 0        | 78177972  | ref | YP_394287.1    | Alkyl hydroperoxide reductase/Thiol specific antioxidant          | Sulfurimonas denitrificans DSM 1251                 | group 1 | VLAFFPLDFTFYCPSEVSHFAWRETPVSGGIGESVALRG        |
|     |          | 78498512  | gb  | AB845052.1     | Alkyl hydroperoxide reductase/Thiol specific antioxidant          | Sulfurimonas denitrificans DSM 1251                 | group 1 | FFYPLDFTFYCPTEVSVSHLAWIQTSREGGLGVLDGIALRG      |
| 245 | 0        | 81301118  | ref | YP_401326.1    | thioredoxin peroxidase                                            | Synechococcus elongatus PCC 7942                    | group 1 | FFYPLDFTFYCPTEVSVSHLAWIQTSREGGLGVLDGIALRG      |
|     |          | 31539390  | gb  | AAF49028.1     | thioredoxin-peroxidase                                            | Synechococcus sp. PCC 7942                          | group 1 | FFYPLDFTFYCPTEVSVSHLAWIQTSREGGLGVLDGIALRG      |
| 246 | 0        | 81169999  | gb  | ABB58339.1     | thioredoxin peroxidase                                            | Synechococcus elongatus PCC 7942                    | group 1 | VLVFFYPLDFTFYCPSEVSHHAWKNTPKVGGIGEGEIALRGNMK   |
|     |          | 12721099  | gb  | AAK02879.1     | TsaA                                                              | Pasteurella multocida subsp. multocida str. Pm70    | group 1 | FFYPLDFTFYCPTEVSVSHLAWIQTSREGGLGVLDGIALRG      |
| 247 | 0        | 145340570 | ref | NP_245732.1    | predicted protein                                                 | Pasteurella multocida subsp. multocida str. Pm70    | group 1 | FFYPLDFTFYCPTEVSVSHLAWIQTSREGGLGVLDGIALRG      |
|     |          | 144875618 | gb  | ABO93887.1     | predicted protein                                                 | Ostreococcus lucimarinus CCE9901                    | group 1 | FFYPLDFTFYCPTEVSVSHLAWIQTSREGGLGVLDGIALRG      |
| 248 | 0        | 29150163  | emb | CAD79625.1     | alkyl hydroperoxide reductase C22 protein                         | Ostreococcus lucimarinus CCE9901                    | group 1 | FFYPLDFTFYCPTEVSVSHLAWIQTSREGGLGVLDGIALRG      |
|     |          | 34850277  | emb | CAE47414.1     | alkyl hydroperoxide reductase C22                                 | Helicobacter pylori                                 | group 1 | FFYPLDFTFYCPTEVSVSHLAWIQTSREGGLGVLDGIALRG      |
|     |          | 34850279  | emb | CAE47415.1     | alkyl hydroperoxide reductase C22                                 | Helicobacter pylori                                 | group 1 | FFYPLDFTFYCPTEVSVSHLAWIQTSREGGLGVLDGIALRG      |
|     |          | 34850281  | emb | CAE47416.1     | alkyl hydroperoxide reductase C22                                 | Helicobacter pylori                                 | group 1 | FFYPLDFTFYCPTEVSVSHLAWIQTSREGGLGVLDGIALRG      |
| 249 | 0        | 6435547   | pdb | 1QO2           | A Chain A, Crystall Structure Of A Mammalian 2-Cys Prx            | Rattus norvegicus                                   | group 1 | FFYPLDFTFYCPTEVSVSHLAWIQTSREGGLGVLDGIALRG      |
|     |          | 6435548   | pdb | 1QO2           | B Chain B, Crystall Structure Of A Mammalian 2-Cys Prx            | Rattus norvegicus                                   | group 1 | FFYPLDFTFYCPTEVSVSHLAWIQTSREGGLGVLDGIALRG      |
| 250 | 0        | 109158138 | pdb | 2H01           | A Chain A, Py00414 - Plasmodium Yoelii Thioredoxin                | Plasmodium Yoelii                                   | group 1 | YFYPLDFTFYCPSECVTHLAWKKTPLQGGIGESVALRAVLI      |
| 251 | 0        | 59712582  | ref | YP_205358.1    | alkyl hydroperoxide reductase C22 protein                         | Vibrio fischeri ES114                               | group 1 | VLVFFYPLDFTFYCPSEVSHHAWRNTAIDGGIGAGVAFRG       |
|     |          | 59480683  | gb  | AAW06470.1     | alkyl hydroperoxide reductase C22 protein                         | Vibrio fischeri ES114                               | group 1 | VLVFFYPLDFTFYCPSEVSHHAWRNTAIDGGIGAGVAFRG       |
| 252 | 0        | 154334818 | ref | XP_001563956.1 | tryparedoxin peroxidase                                           | Leishmania braziliensis MHOM/BR/75/M2/904           | group 1 | FFYPLDFTFYCPTECVSAHLQWTLQERKGGGLVLDKGVAYVRG    |
|     |          | 134060577 | emb | CAMA2125.1     | tryparedoxin peroxidase                                           | Leishmania braziliensis                             | group 1 | FFYPLDFTFYCPTECVSAHLQWTLQERKGGGLVLDKGVAYVRG    |
| 253 | 0        | 75043305  | sp  | G6B4J9         | PRDX1, MYOLU Peroxidoxin-1                                        | Myotis lucifugus                                    | group 1 | FFYPLDFTFYCPTEVSDSCHLAWINTPKQGGI, GVLKEGISFRG  |
|     |          | 50593309  | gb  | AA179401.1     | thioredoxin peroxidase                                            | Myotis lucifugus                                    | group 1 | FFYPLDFTFYCPTEVSDSCHLAWINTPKQGGI, GVLKEGISFRG  |
| 254 | 0        | 52426576  | ref | YP_088713.1    | AhpC protein                                                      | Mannheimia succiniciproducens MBE1 65E              | group 1 | VLVFFYPLDFTFYCPSEVSHHAWRNTAVQGGIGAGVALRA       |
|     |          | 52307628  | gb  | AAU38128.1     | AhpC protein                                                      | Mannheimia succiniciproducens MBE1 65E              | group 1 | VLVFFYPLDFTFYCPSEVSHHAWRNTAVQGGIGAGVALRA       |
| 255 | 7.96E-13 | 17548466  | ref | NP_521806.1    | PROBABLE ALKYL HYDROPEROXIDE REDUCTASE                            | Raistonia solanacearum GMIT000                      | group 2 | VEVNLKIFMPAAFTFNCPTESHKHWYHETSPSEGLALRGEVVK    |
|     |          | 17430713  | emb | CAD17396.1     | probable alkyl hydroperoxide reductase (subunit c) oxidoreductase | Raistonia solanacearum                              | group 2 | VEVNLKIFMPAAFTFNCPTESHKHWYHETSPSEGLALRGEVVK    |
| 256 | 1.08E-16 | 8927563   | gb  | AAE82118.1     | AF276071_2, peroxidoxin                                           | Thermus aquaticus                                   | group 2 | CFYPADFTFYCPTEVSTTHKAWHDTSPVLDGGLAQRGADGIG     |
| 257 | 0        | 37676710  | ref | NP_937106.1    | peroxidoxin                                                       | Vibrio vulnificus YJ016                             | group 2 | NLTKTTIKFYFPADFTFYCPTEVSTTHKAWHDSDDQGLADRA     |
|     |          | 37201253  | dbj | BAC97076.1     | peroxidoxin                                                       | Vibrio vulnificus YJ016                             | group 2 | NLTKTTIKFYFPADFTFYCPTEVSTTHKAWHDSDDQGLADRA     |
| 259 | 0        | 93211500  | gb  | ABF01135.1     | natural killer enhancing factor                                   | Scaphthalmus maximus                                | group 1 | FFYPLDFTFYCPTECVSHLAWINTPRQGGI, GVLKDGIAVRG    |
| 260 | 0        | 47220267  | emb | CAG03301.1     | unnamed protein product                                           | Tetraodon nigroviridis                              | group 1 | FFYPLDFTFYCPTECVSHLAWINTPRQGGI, GVLKDGIAVRG    |
|     |          | 84569642  | gb  | ABC59169.1     | natural killer enhancing factor B                                 | Tetraodon nigroviridis                              | group 1 | FFYPLDFTFYCPTECVSHLAWINTPRQGGI, GVLKDGIAVRG    |
| 261 | 2.22E-15 | 5029125   | ref | XP_448495.1    | unnamed protein product                                           | Candida glabrata                                    | group 1 | AFVPLAFVYCPTESSLAWNTAVRDGGI, GVDVILLEGIALRG    |
|     |          | 49627807  | emb | CAG61456.1     | unnamed protein product                                           | Candida glabrata CBS 138                            | group 1 | AFVPLAFVYCPTESSLAWNTAVRDGGI, GVDVILLEGIALRG    |
| 262 | 0        | 32186932  | ref | NP_058000.3    | peroxidoxin 2 isoform a                                           | Homo sapiens                                        | group 1 | FFYPLDFTFYCPTEVSVTHLAWINTPREGGL, GVLKEGIAVRG   |
|     |          | 109123651 | ref | XP_00109159.1  | PREDICTED: peroxidoxin 2 isoform 4                                | Macaca mulatta                                      | group 1 | FFYPLDFTFYCPTEVSVTHLAWINTPREGGL, GVLKEGIAVRG   |
|     |          | 109123563 | ref | XP_001109216.1 | PREDICTED: peroxidoxin 2 isoform 5                                | Macaca mulatta                                      | group 1 | FFYPLDFTFYCPTEVSVTHLAWINTPREGGL, GVLKEGIAVRG   |
|     |          | 114675617 | ref | XP_524127.2    | PREDICTED: peroxidoxin 2                                          | Pan troglodytes                                     | group 1 | FFYPLDFTFYCPTEVSVTHLAWINTPREGGL, GVLKDGIAVRG   |
|     |          | 2507169   | sp  | P32119         | PRDX2, HUMAN Peroxidoxin-2 (Thioredoxin peroxidase)               | Homo sapiens                                        | group 1 | FFYPLDFTFYCPTEVSVTHLAWINTPREGGL, GVLKDGIAVRG   |
|     |          | 118597354 | sp  | Q2PFF2         | PRDX2, MACFA Peroxidoxin-2                                        | Macaca fascicularis                                 | group 1 | FFYPLDFTFYCPTEVSVTHLAWINTPREGGL, GVLKDGIAVRG   |
|     |          | 12653365  | gb  | AAH00452.1     | Peroxidoxin 2                                                     | Homo sapiens                                        | group 1 | FFYPLDFTFYCPTEVSVTHLAWINTPREGGL, GVLKDGIAVRG   |
|     |          | 12804327  | gb  | AAH03022.1     | Peroxidoxin 2                                                     | Homo sapiens                                        | group 1 | FFYPLDFTFYCPTEVSVTHLAWINTPREGGL, GVLKDGIAVRG   |
|     |          | 24659879  | gb  | AAH39428.1     | Peroxidoxin 2                                                     | Homo sapiens                                        | group 1 | FFYPLDFTFYCPTEVSVTHLAWINTPREGGL, GVLKDGIAVRG   |
|     |          | 47496659  | emb | CAG29352.1     | PRDX2                                                             | Homo sapiens                                        | group 1 | FFYPLDFTFYCPTEVSVTHLAWINTPREGGL, GVLKDGIAVRG   |
|     |          | 49456535  | emb | CAG46588.1     | PRDX2                                                             | Homo sapiens                                        | group 1 | FFYPLDFTFYCPTEVSVTHLAWINTPREGGL, GVLKDGIAVRG   |
|     |          | 60818622  | gb  | AAAX36471.1    | peroxidoxin 2                                                     | synthetic construct                                 | group 1 | FFYPLDFTFYCPTEVSVTHLAWINTPREGGL, GVLKDGIAVRG   |
|     |          | 61362999  | gb  | AAAX42317.1    | peroxidoxin 2                                                     | synthetic construct                                 | group 1 | FFYPLDFTFYCPTEVSVTHLAWINTPREGGL, GVLKDGIAVRG   |
|     |          | 77744389  | gb  | ABB02182.1     | peroxidoxin 2                                                     | Homo sapiens                                        | group 1 | FFYPLDFTFYCPTEVSVTHLAWINTPREGGL, GVLKDGIAVRG   |
|     |          | 84579087  | dbj | BAE72977.1     | hypothetical protein                                              | Macaca fascicularis                                 | group 1 | FFYPLDFTFYCPTEVSVTHLAWINTPREGGL, GVLKDGIAVRG   |
|     |          | 119604715 | gb  | EAW64309.1     | peroxidoxin 2, isoform CRA_b                                      | Homo sapiens                                        | group 1 | FFYPLDFTFYCPTEVSVTHLAWINTPREGGL, GVLKDGIAVRG   |
|     |          | 123997455 | gb  | ABM66329.1     | peroxidoxin 2                                                     | synthetic construct                                 | group 1 | FFYPLDFTFYCPTEVSVTHLAWINTPREGGL, GVLKDGIAVRG   |
|     |          | 157926986 | gb  | AAW03776.1     | peroxidoxin 2                                                     | synthetic construct                                 | group 1 | FFYPLDFTFYCPTEVSVTHLAWINTPREGGL, GVLKDGIAVRG   |
| 263 | 0        | 71084314  | gb  | AAW23602.1     | peroxidoxin 2                                                     | Leishmania aethiopia                                | group 1 | FFYPLDFTFYCPTEVSVTHLAWINTPREGGL, GVLKDGIAVRG   |
| 264 | 0        | 157885981 | emb | CAP09410.1     | novel protein similar to vertebrate peroxidoxin 3 (PRDX3)         | Danio rerio                                         | group 1 | VLSFYPLDFTFYCPTEVSVTHLAWINTPREGGL, GVLKDGIAVRG |
| 265 | 0        | 109948144 | ref | YP_665372.1    | alkyl hydroperoxide reductase                                     | Helicobacter acinonychis str. Sheeba                | group 1 | FFYPLDFTFYCPTEVSVTHLAWINTPREGGL, GVLKDGIAVRG   |
|     |          | 109716365 | emb | CAK00373.1     | alkyl hydroperoxide reductase                                     | Helicobacter acinonychis str. Sheeba                | group 1 | FFYPLDFTFYCPTEVSVTHLAWINTPREGGL, GVLKDGIAVRG   |
| 266 | 0        | 26897354  | ref | NP_796959.1    | antioxidant, AhpC/Tsa family                                      | Vibrio parahaemolyticus RIMD 221 0633               | group 1 | VLVFFYPLDFTFYCPSEVSHHAWRNTAIDGGIGAGVAFRG       |
|     |          | 91225164  | ref | ZP_01260386.1  | antioxidant, AhpC/Tsa family                                      | Vibrio alginolyticus T2G01                          | group 1 | VLVFFYPLDFTFYCPSEVSHHAWRNTAIDGGIGAGVAFRG       |
|     |          | 116186594 | ref | ZP_01476488.1  | hypothetical protein VEK2w_02000966                               | Vibrio sp. Ex25                                     | group 1 | VLVFFYPLDFTFYCPSEVSHHAWRNTAIDGGIGAGVAFRG       |
|     |          | 153838066 | ref | ZP_0190733.1   | antioxidant, AhpC/Tsa family                                      | Vibrio parahaemolyticus AQ3810                      | group 1 | VLVFFYPLDFTFYCPSEVSHHAWRNTAIDGGIGAGVAFRG       |
|     |          | 28805566  | dbi | BAC58843.1     | antioxidant, AhpC/Tsa family                                      | Vibrio parahaemolyticus RIMD 221 0633               | group 1 | VLVFFYPLDFTFYCPSEVSHHAWRNTAIDGGIGAGVAFRG       |
|     |          | 91190107  | gb  | EAS76376.1     | antioxidant, AhpC/Tsa family                                      | Vibrio alginolyticus T2G01                          | group 1 | VLVFFYPLDFTFYCPSEVSHHAWRNTAIDGGIGAGVAFRG       |
|     |          | 149748533 | gb  | EDM59392.1     | antioxidant, AhpC/Tsa family                                      | Vibrio parahaemolyticus AQ3810                      | group 1 | VLVFFYPLDFTFYCPSEVSHHAWRNTAIDGGIGAGVAFRG       |
| 267 | 1.14E-16 | 30260515  | ref | NP_842892.1    | alkyl hydroperoxide reductase, subunit C                          | Bacillus anthracis str. Ames                        | group 2 | CFYPADFTFYCPTEVSTTHKAWHDSSEVLMFGLAARGADGIG     |
|     |          | 47279521  | ref | NP_976788.1    | alkyl hydroperoxide reductase, subunit C                          | Bacillus cereus ATCC 10987                          | group 2 | CFYPADFTFYCPTEVSTTHKAWHDSSEVLMFGLAARGADGIG     |
|     |          | 47525612  | ref | YP_016961.1    | alkyl hydroperoxide reductase, subunit C                          | Bacillus anthracis str. Ames Ancestor               | group 2 | CFYPADFTFYCPTEVSTTHKAWHDSSEVLMFGLAARGADGIG     |
|     |          | 49183368  | ref | YP_026610.1    | alkyl hydroperoxide reductase, subunit C                          | Bacillus anthracis str. Sterne                      | group 2 | CFYPADFTFYCPTEVSTTHKAWHDSSEVLMFGLAARGADGIG     |
|     |          | 49480063  | ref | YP_034664.1    | alkyl hydroperoxide reductase (peroxidoxin)                       | Bacillus thuringiensis serovar konkukian str. 97-27 | group 2 | CFYPADFTFYCPTEVSTTHKAWHDSSEVLMFGLAARGADGIG     |
|     |          | 52144902  | ref | YP_081926.1    | probable alkyl hydroperoxide reductase (peroxidoxin)              | Bacillus cereus E33L                                | group 2 | CFYPADFTFYCPTEVSTTHKAWHDSSEVLMFGLAARGADGIG     |

|     |           |           |               |                                                          |                                                             |                                                       |         |  |                                              |
|-----|-----------|-----------|---------------|----------------------------------------------------------|-------------------------------------------------------------|-------------------------------------------------------|---------|--|----------------------------------------------|
|     | 65317768  | ref       | ZP_0039027.1  | COG0450: Peroxiredoxin                                   | Bacillus anthracis str. A2012                               |                                                       |         |  |                                              |
|     | 118476093 | ref       | YP_839244.1   | alkyl hydroperoxidase reductase, subunit C               | Bacillus thuringiensis str. Al Hakam                        |                                                       |         |  |                                              |
|     | 658971427 | ref       | ZP_02216075.1 | peroxiredoxin                                            | Bacillus anthracis str. A0488                               |                                                       |         |  |                                              |
|     | 30253863  | gb        | AAFP24378.1   | alkyl hydroperoxidase reductase, subunit C               | Bacillus anthracis str. Ames                                |                                                       |         |  |                                              |
|     | 427358437 | gb        | AAAS39376.1   | alkyl hydroperoxidase reductase, subunit C               | Bacillus cereus ATCC 10987                                  |                                                       |         |  |                                              |
|     | 47500760  | gb        | AAI29436.1    | alkyl hydroperoxidase reductase, subunit C               | Bacillus anthracis str. Ames Ancestor                       |                                                       |         |  |                                              |
|     | 49177285  | gb        | AAI5286.1     | alkyl hydroperoxidase reductase, subunit C               | Bacillus anthracis str. Sterne                              |                                                       |         |  |                                              |
|     | 49331619  | gb        | AAI16265.1    | probable alkyl hydroperoxidase reductase (peroxiredoxin) | Bacillus thuringiensis serovar konkukian str. 97-27         |                                                       |         |  |                                              |
|     | 51978371  | gb        | AAU19821.1    | probable alkyl hydroperoxidase reductase (peroxiredoxin) | Bacillus cereus E33L                                        |                                                       |         |  |                                              |
|     | 118415318 | gb        | ABK83737.1    | alkyl hydroperoxidase reductase, subunit C               | Bacillus thuringiensis str. Al Hakam                        |                                                       |         |  |                                              |
|     | 164712911 | gb        | EDR18440.1    | peroxiredoxin                                            | Bacillus thuringiensis str. A0488                           |                                                       |         |  |                                              |
| 268 | 0         | 3650468   | AAAC1301.1    | alkyl hydroperoxidase reductase: AhpC                    | Mycobacterium marinum                                       | group 3                                               |         |  | LLTIGTFWPKDFTVCPTEVLGIDSVHFQWRQAHDDGVADRV    |
| 269 | 0         | 15604195  | ref           | NP_220710.1                                              | THIOREDOXIN PEROXIDASE 1 (tpX1)                             | Rickettsia prowazekii str. Madrid E                   | group 1 |  | VGKFFYPLDFTVCPSEVSVSLAWKNTPTPKGGGLGDGIALRG   |
|     |           | 3860887   | emb           | CAA14787.1                                               | THIOREDOXIN PEROXIDASE 1 (tpX1)                             | Rickettsia prowazekii                                 | group 1 |  | VLGFYPMDFTFVCPSEVSVCSHFHWKEFTPVKGGIGAGVALRG  |
| 270 | 0         | 154716542 | ref           | ZP_001408847.1                                           | membrane protein                                            | Campylobacter curvus 525-92                           | group 1 |  | VGKFFYPLDFTVCPSEVSVSLAWKNTPTPKGGGLGDGVALRG   |
|     |           | 112803678 | gb            | EAU01022.1                                               | peroxiredoxin                                               | Rickettsia sibirica 246                               | group 1 |  | NMKFFYPMDFTFVCPTEVSTTHLAWINTDRDNGLEGIALRG    |
| 271 | 0         | 34580622  | ref           | ZP_00142102.1                                            | thioredoxin peroxidase 1                                    | Rickettsia sibirica 246                               | group 1 |  | WWSVIFMPAAFTFNCPTEESHKVVHETSPVQKEGLALRQEGVVK |
| 272 | 0         | 157692100 | ref           | YP_001486562.1                                           | peroxiredoxin YkuU                                          | Bacillus pumilus SAFR-032                             | group 1 |  |                                              |
| 273 | 6.27E-12  | 21241677  | ref           | ABV62002.1                                               | peroxiredoxin YkuU                                          | Bacillus pumilus SAFR-032                             | group 2 |  |                                              |
|     |           | 78048499  | ref           | YP_362674.1                                              | alkyl hydroperoxidase reductase subunit C                   | Xanthomonas axonopodis pv. citri str. 306             |         |  |                                              |
|     |           | 2098746   | gb            | AAAC45425.1                                              | alkyl hydroperoxidase reductase subunit C                   | Xanthomonas campestris pv. vesicatoria str. 85-10     |         |  |                                              |
|     |           | 21107042  | gb            | AAAG5795.1                                               | alkyl hydroperoxidase reductase subunit C                   | Xanthomonas campestris                                |         |  |                                              |
|     |           | 78034920  | emb           | CAJ29574.1                                               | alkyl hydroperoxidase reductase subunit C                   | Xanthomonas axonopodis pv. citri str. 306             |         |  |                                              |
| 274 | 7.42E-18  | 89496524  | ref           | ZP_01169416.1                                            | alkyl hydroperoxidase reductase (small subunit)             | Xanthomonas campestris pv. vesicatoria str. 85-10     | group 2 |  | CFYPADFTFVCPTEVSTTHKAWHDHSEVLEDEGLADRAGGIG   |
|     |           | 89088539  | gb            | EAR67648.1                                               | alkyl hydroperoxidase reductase (small subunit)             | Bacillus sp. NRRL B-14911                             | group 2 |  |                                              |
| 275 | 0         | 50539996  | ref           | NP_001002468.1                                           | hypothetical protein LOC43674.1                             | Bacillus sp. NRRL B-14911                             | group 1 |  | FFYPLDFTVCPTESHLAWINTPRQGGGLGVLEKGIAYGRSV    |
|     |           | 49800827  | gb            | AAH76347.1                                               | PREDICTED: hypothetical protein                             | Danio rerio                                           | group 1 |  |                                              |
|     |           | 15788860  | emb           | CAP09310.1                                               | peroxiredoxin 1                                             | Danio rerio                                           | group 1 |  |                                              |
| 276 | 0         | 60634541  | gb            | AAK37099.1                                               | peroxiredoxin 4                                             | Danio rerio                                           | group 1 |  |                                              |
| 277 | 5.65E-14  | 57866005  | ref           | YP_187698.1                                              | alkyl hydroperoxidase reductase, C subunit                  | Synthetic construct                                   | group 1 |  | VSVLEKFFYPLDFTVCPTEIETHLAWINTPRQGGGLGSGHTLRR |
|     |           | 81819462  | gb            | G51HR1                                                   | AHPC STAEQ Alkyl hydroperoxidase reductase subunit          | Staphylococcus epidermidis RP62A                      | group 2 |  | CFYPADFSEVCPTEVSTVHKAWHDHSDVLDTLGLAORGADGIG  |
|     |           | 57636663  | gb            | AAW63451.1                                               | alkyl hydroperoxidase reductase, C subunit                  | Staphylococcus epidermidis RP62A                      |         |  |                                              |
| 278 | 0         | 14029099  | gb            | AAK51148.1                                               | 26,000 kDa protein                                          | Helicobacter pylori                                   | group 1 |  | FFWPKDFTVCPTEVSHVFAWKNTPVKGGIGEAALRGNMK      |
| 279 | 1.53E-14  | 149278224 | ref           | ZP_01884362.1                                            | peroxiredoxin                                               | Pedobacter sp. BAL39                                  | group 3 |  | FWMPKDFTVCPTEVSHLAWIRHNDLRLGKEKAFRAVSVLD     |
|     |           | 149230990 | gb            | EDM86371.1                                               | peroxiredoxin                                               | Pedobacter sp. BAL39                                  | group 3 |  |                                              |
| 280 | 0         | 56757159  | gb            | AAW27020.1                                               | SJCHGC02884 protein                                         | Schistosoma japonicum                                 | group 1 |  | NLKFFYPADFTFVCPTECSHSLAWTKQDRSGGLGEGNAFRG    |
| 281 | 0         | 33661413  | ref           | NP_892974.1                                              | thioredoxin peroxidase                                      | Prochlorococcus marinus subsp. pastoris str. COMP1986 | group 1 |  | FFYPLDFTVCPTEVSLGVDSDHSLAWIQTPREGGGLGEGADRQ  |
|     |           | 33633990  | emb           | CAE19315.1                                               | thioredoxin peroxidase                                      | Prochlorococcus marinus subsp. pastoris str. COMP1986 | group 1 |  |                                              |
| 282 | 0         | 114770713 | ref           | ZP_01448203.1                                            | putative alkyl hydroperoxidase reductase, subunit C         | alpha proteobacterium HTCC2255                        | group 2 |  | LFYPADFTFVCPTEVSHVFAWKHDHSEVMIAGALRGDLGIG    |
| 283 | 0         | 113970711 | ref           | YP_734504.1                                              | alkyl hydroperoxidase reductase/ Thiol specific antioxidant | Shewanella sp. MR-4                                   | group 1 |  | VLVFFYPLDFTVCPSEVSTHNAWRNTPVKGGIGAGVAFRG     |
|     |           | 114047940 | ref           | YP_738490.1                                              | alkyl hydroperoxidase reductase/ Thiol specific antioxidant | Shewanella sp. MR-7                                   |         |  |                                              |
|     |           | 117920982 | ref           | YP_870174.1                                              | alkyl hydroperoxidase reductase/ Thiol specific antioxidant | Shewanella sp. ANA-3                                  |         |  |                                              |
|     |           | 113885395 | gb            | ABI39447.1                                               | alkyl hydroperoxidase reductase/ Thiol specific antioxidant | Shewanella sp. MR-4                                   |         |  |                                              |
|     |           | 113888382 | gb            | ABI43433.1                                               | alkyl hydroperoxidase reductase/ Thiol specific antioxidant | Shewanella sp. MR-7                                   |         |  |                                              |
|     |           | 117613314 | gb            | ABK48768.1                                               | alkyl hydroperoxidase reductase/ Thiol specific antioxidant | Shewanella sp. ANA-3                                  |         |  |                                              |
| 284 | 0         | 24372545  | ref           | NP_716587.1                                              | alkyl hydroperoxidase reductase, C subunit                  | Shewanella oneidensis MR-1                            | group 2 |  | FFYPADFTVCPTEVSTTHKAWHDHSDVMIEGLALRGDLGIG    |
|     |           | 24346560  | gb            | AAAN54032.1                                              | AEO15541_2 alkyl hydroperoxidase reductase, C subunit       | Shewanella oneidensis MR-1                            | group 2 |  |                                              |
| 285 | 2.90E-17  | 13786919  | pub           | IE2Y                                                     | A Chain A. Tryparedoxin Peroxidase From Crithidia F.        | Crithidia Fasciculata                                 | group 1 |  | LFYPLDFTVCPTECSHSLAWTKQDRSGGLGVLDSGVAYRG     |
|     |           | 13786920  | pub           | IE2Y                                                     | B Chain B. Tryparedoxin Peroxidase From Crithidia F.        | Crithidia Fasciculata                                 | group 1 |  |                                              |
|     |           | 13786921  | pub           | IE2Y                                                     | C Chain C. Tryparedoxin Peroxidase From Crithidia F.        | Crithidia Fasciculata                                 | group 1 |  |                                              |
|     |           | 13786922  | pub           | IE2Y                                                     | D Chain D. Tryparedoxin Peroxidase From Crithidia F.        | Crithidia Fasciculata                                 | group 1 |  |                                              |
|     |           | 13786923  | pub           | IE2Y                                                     | E Chain E. Tryparedoxin Peroxidase From Crithidia F.        | Crithidia Fasciculata                                 | group 1 |  |                                              |
|     |           | 13786924  | pub           | IE2Y                                                     | F Chain F. Tryparedoxin Peroxidase From Crithidia F.        | Crithidia Fasciculata                                 | group 1 |  |                                              |
|     |           | 13786925  | pub           | IE2Y                                                     | G Chain G. Tryparedoxin Peroxidase From Crithidia F.        | Crithidia Fasciculata                                 | group 1 |  |                                              |
|     |           | 13786926  | pub           | IE2Y                                                     | H Chain H. Tryparedoxin Peroxidase From Crithidia F.        | Crithidia Fasciculata                                 | group 1 |  |                                              |
|     |           | 13786927  | pub           | IE2Y                                                     | I Chain I. Tryparedoxin Peroxidase From Crithidia F.        | Crithidia Fasciculata                                 | group 1 |  |                                              |
|     |           | 13786928  | pub           | IE2Y                                                     | J Chain J. Tryparedoxin Peroxidase From Crithidia F.        | Crithidia Fasciculata                                 | group 1 |  |                                              |
| 286 | 0         | 157346136 | emb           | CAO15833.1                                               | unnamed protein product                                     | Vitis vinifera                                        | group 1 |  | FFYPLDFTVCPTEVSHLAWTKQDRSGGLGVLIQGVYALRG     |
| 287 | 2.09E-15  | 156844947 | ref           | XP_001645534.1                                           | hypothetical protein Kpnl_1004p51                           | Vandewaliozyma polyspora DSM 70294                    | group 1 |  | AFIPLAFTVCPTESSLAWNTVARDGGLGVDVILEGIALRG     |
|     |           | 156118198 | gb            | EDO17678.1                                               | hypothetical protein Kpnl_1004p51                           | Vandewaliozyma polyspora DSM 70294                    | group 1 |  |                                              |
| 288 | 0         | 54301415  | gb            | AAV33162.1                                               | alkyl hydroperoxidase reductase                             | Helicobacter pylori                                   | group 1 |  | FFWPKDFTVCPTEVSHVFAWKNTPVKGGIGEAALRGNMK      |
|     |           | 54301417  | gb            | AAV33163.1                                               | alkyl hydroperoxidase reductase                             | Helicobacter pylori                                   | group 1 |  |                                              |
|     |           | 58198721  | gb            | AAW86000.1                                               | alkyl hydroperoxidase reductase                             | Helicobacter pylori                                   | group 1 |  |                                              |
| 289 | 1.87E-16  | 138898143 | ref           | YP_001126596.1                                           | Alkyl hydroperoxidase reductase, subunit C                  | Geobacillus thermodenitrificans N680-2                | group 2 |  | CFYPADFTFVCPTEVSTTHKAWHDHSDVLDGLAORGADGIG    |
|     |           | 134267656 | gb            | ABO67851.1                                               | Alkyl hydroperoxidase reductase, subunit C                  | Geobacillus thermodenitrificans N680-2                | group 2 |  |                                              |
| 290 | 2.03E-17  | 118497565 | ref           | YP_898615.1                                              | peroxiredoxin of the AhpC/TSA family                        | Francisella tularensis subsp. novicida U112           | group 1 |  | VLVFFYPLDFTVCPSEVSVTHNAWRNTPIDGGIGGGMAFRG    |
|     |           | 118423471 | gb            | ABK89861.1                                               | peroxiredoxin of the AhpC/TSA family                        | Francisella tularensis subsp. novicida U112           | group 1 |  |                                              |



|     |          |           |     |                |                                                          |                                            |         |                                               |
|-----|----------|-----------|-----|----------------|----------------------------------------------------------|--------------------------------------------|---------|-----------------------------------------------|
| 323 | 4.89E-21 | 123385230 | ref | XP_001299092.1 | trypanothione peroxidase, putative                       | <i>Trichomonas vaginalis</i> G3            | group 1 | FSYPLDFTFVCPTEVLGVDSHSLAWRNTPREGGLGAGHDLRGLG  |
|     |          | 121879854 | gb  | EA_X86162.1    | trypanothione peroxidase, putative                       | <i>Trichomonas vaginalis</i> G3            | group 1 | FFYPLDFTFVCPTEVSVCHLPWINPKQGGGLVLEKGISFRG     |
| 324 | 0        | 94400195  | ref | XP_001003388.1 | PREDICTED: similar to MSP23 isoform 2                    | <i>Mus musculus</i>                        | group 1 | ELKFFYPLDFTFVCPTECSVTHLAWINTPRQGGLSGSHHTLRG   |
|     |          | 148666674 | gb  | EDK98090.1     | trcG127770                                               | <i>Mus musculus</i>                        | group 1 |                                               |
| 325 | 0        | 149243259 | pdb | 2PN8           | A Chain A, Crystall Structure Of Human Peroxiredoxin     | <i>Homo sapiens</i>                        | group 1 |                                               |
|     |          | 149243260 | pdb | 2PN8           | B Chain B, Crystall Structure Of Human Peroxiredoxin     | <i>Homo sapiens</i>                        | group 1 |                                               |
|     |          | 149243261 | pdb | 2PN8           | C Chain C, Crystall Structure Of Human Peroxiredoxin     | <i>Homo sapiens</i>                        | group 1 |                                               |
|     |          | 149243262 | pdb | 2PN8           | D Chain D, Crystall Structure Of Human Peroxiredoxin     | <i>Homo sapiens</i>                        | group 1 |                                               |
|     |          | 149243263 | pdb | 2PN8           | E Chain E, Crystall Structure Of Human Peroxiredoxin     | <i>Homo sapiens</i>                        | group 1 |                                               |
|     |          | 149243264 | pdb | 2PN8           | F Chain F, Crystall Structure Of Human Peroxiredoxin     | <i>Homo sapiens</i>                        | group 1 |                                               |
|     |          | 149243265 | pdb | 2PN8           | G Chain G, Crystall Structure Of Human Peroxiredoxin     | <i>Homo sapiens</i>                        | group 1 |                                               |
|     |          | 149243266 | pdb | 2PN8           | H Chain H, Crystall Structure Of Human Peroxiredoxin     | <i>Homo sapiens</i>                        | group 1 |                                               |
|     |          | 149243267 | pdb | 2PN8           | I Chain I, Crystall Structure Of Human Peroxiredoxin 4   | <i>Homo sapiens</i>                        | group 1 |                                               |
|     |          | 149243268 | pdb | 2PN8           | J Chain J, Crystall Structure Of Human Peroxiredoxin 4   | <i>Homo sapiens</i>                        | group 1 |                                               |
| 326 | 3.07E-16 | 88713494  | ref | ZP_01107576.1  | putative thioredoxin peroxidase                          | <i>Flavobacteriales bacterium</i> HTCC2170 | group 4 | VLEFWPKDFTFVCPTECDTVHFAWLNTAKNGGIEDNVTYRA     |
|     |          | 88708004  | gb  | EAR00242.1     | putative thioredoxin peroxidase                          | <i>Flavobacteriales bacterium</i> HTCC2170 | group 4 |                                               |
| 327 | 0        | 14928070  | gb  | ABR23404.1     | thioredoxin peroxidase                                   | <i>Onchocerca paheri</i>                   | group 1 | FFYPLDFTFVCPTECSAGHLAWINTPREGGGLVLEKIGIFERG   |
| 328 | 0        | 3193232   | gb  | AACT7922.1     | peroxidoxin-2                                            | <i>Onchocerca ochengi</i>                  | group 1 | FFYPLDFTFVCPTECSSTHLAWINTDRMGGGLVLEKGIAYRAG   |
| 329 | 0        | 113969145 | ref | YP_732938.1    | alkyl hydroperoxide reductase/Thiol specific antioxidant | <i>Shewanella sp. MR-4</i>                 | group 2 | FFYPAADFVCPTEVSTTHKAWHDTSDVMIEGLALRGDGLGIG    |
|     |          | 114048713 | ref | YP_739263.1    | alkyl hydroperoxide reductase/Thiol specific antioxidant | <i>Shewanella sp. MR-4</i>                 | group 2 |                                               |
|     |          | 113883829 | pdb | AB137881.1     | alkyl hydroperoxide reductase/Thiol specific antioxidant | <i>Shewanella sp. MR-4</i>                 | group 1 |                                               |
|     |          | 113890155 | pdb | AB144206.1     | alkyl hydroperoxide reductase/Thiol specific antioxidant | <i>Shewanella sp. MR-4</i>                 | group 1 |                                               |
| 330 | 4.95E-23 | 123974738 | ref | XP_001330098.1 | thioredoxin peroxidase                                   | <i>Trichomonas vaginalis</i> G3            | group 1 | FSYPLDFTFVCPTEVLGVDSHSLAWINTPREGGGLGAGHDLRGLG |
|     |          | 34542000  | gb  | AAO74891.1     | thioredoxin peroxidase                                   | <i>Trichomonas vaginalis</i>               | group 1 |                                               |
|     |          | 121695915 | gb  | EAY01083.1     | thioredoxin peroxidase                                   | <i>Trichomonas vaginalis</i> G3            | group 1 |                                               |
| 331 | 0        | 159483223 | ref | XP_001699860.1 | 2-cys peroxiredoxin                                      | <i>Chlamydomonas reinhardtii</i>           | group 1 | FFYPLDFTFVCPTEIDSTHLAFSNTPRKGGGLVLIAGVTLRGLG  |
|     |          | 158281602 | gb  | EDP07356.1     | 2-cys peroxiredoxin                                      | <i>Chlamydomonas reinhardtii</i>           | group 1 |                                               |
| 332 | 0        | 152997390 | ref | YP_001342225.1 | alkyl hydroperoxide reductase/Thiol specific antioxidant | <i>Marimononas sp. MWYL1</i>               | group 1 | VLAFFYPLDFTFVCPSEVSIHNAWRNTPVQGGIGAGVAMRA     |
|     |          | 150838314 | gb  | ABR72290.1     | alkyl hydroperoxide reductase/Thiol specific antioxidant | <i>Marimononas sp. MWYL1</i>               | group 1 |                                               |
| 333 | 8.81E-18 | 114332323 | ref | YP_748545.1    | alkyl hydroperoxide reductase/Thiol specific antioxidant | <i>Nitrosomonas europha C91</i>            | group 2 | NTTKVFPADFTFVCPTEVSTTHKAWHDSVSLIEGLALRGLG     |
|     |          | 114509337 | gb  | AB160580.1     | alkyl hydroperoxide reductase/Thiol specific antioxidant | <i>Nitrosomonas europha C91</i>            | group 2 |                                               |
| 334 | 0        | 145833765 | ref | XP_001452627.1 | hypothetical protein GSPAT000026330001                   | <i>Paramecium tetraurelia strain d4-2</i>  | group 1 | FNKQFRISLFFYPLDFTFVCPTEVSVNGGLGFGVAFRGLR      |
|     |          | 124420326 | emb | CAK65230.1     | unnamed protein product                                  | <i>Paramecium tetraurelia</i>              | group 1 |                                               |
| 335 | 0        | 111020264 | ref | YP_703236.1    | alkyl hydroperoxide reductase                            | <i>Rhodococcus sp. RHA1</i>                | group 2 | YFYPADFTFVCPTEVSTTHKAWHGSVSLREGLADRGAEIG      |
|     |          | 110819794 | gb  | ABG96078.1     | alkyl hydroperoxide reductase                            | <i>Rhodococcus sp. RHA1</i>                | group 2 |                                               |
| 336 | 4.57E-14 | 67462491  | ref | XP_647907.1    | peroxiredoxin                                            | <i>Entamoeba histolytica HM-1:IMSS</i>     | group 1 | RIKAKFKFINLYPLDWTFCVPTQLKYSVKGGVGGAGIARRRG    |
| 337 | 4.95E-14 | 165898903 | gb  | EDR25942.1     | hypothetical protein, conserved                          | <i>Entamoeba dispar</i> SAW760             | group 1 | LFYPLDWTFCVPTQLKYSVKGGVGGAGIARRRG             |
| 338 | 0        | 15598725  | ref | NP_252219.1    | probable peroxidase                                      | <i>Pseudomonas aeruginosa PAO1</i>         | group 1 | VLVFFYPLDFTFVCPSEVSIHNAWRNTPVKGIGGGVAFRGLG    |
|     |          | 84319755  | ref | NP_00968145.1  | COG0450: Peroxiredoxin                                   | <i>Pseudomonas aeruginosa PAO1</i>         | group 1 |                                               |
|     |          | 84325803  | ref | ZP_00973835.1  | COG0450: Peroxiredoxin                                   | <i>Pseudomonas aeruginosa C3719</i>        | group 1 |                                               |
|     |          | 107103041 | ref | ZP_01386959.1  | hypothetical protein PaerPA_01004110                     | <i>Pseudomonas aeruginosa 2192</i>         | group 1 |                                               |
|     |          | 116051528 | ref | YP_789636.1    | putative alkyl hydroperoxide reductase subunit           | <i>Pseudomonas aeruginosa UCBPP-PA14</i>   | group 1 |                                               |
|     |          | 152986134 | ref | YP_001347002.1 | probable peroxidase                                      | <i>Pseudomonas aeruginosa PAO1</i>         | group 1 |                                               |
|     |          | 9949678   | gb  | AAO06917.1     | AE004773.6 probable peroxidase                           | <i>Pseudomonas aeruginosa PAO1</i>         | group 1 |                                               |
|     |          | 115686749 | gb  | ABJ12764.1     | putative alkyl hydroperoxide reductase subunit           | <i>Pseudomonas aeruginosa UCBPP-PA14</i>   | group 1 |                                               |
|     |          | 126168384 | gb  | EA_Z53895.1    | hypothetical protein PACG_02440                          | <i>Pseudomonas aeruginosa C3719</i>        | group 1 |                                               |
|     |          | 126196567 | gb  | EA_Z59630.1    | hypothetical protein PAZG_02923                          | <i>Pseudomonas aeruginosa 2192</i>         | group 1 |                                               |
|     |          | 150961292 | gb  | ABR83317.1     | probable peroxidase                                      | <i>Pseudomonas aeruginosa PAO1</i>         | group 1 |                                               |
| 339 | 0        | 1841155   | ref | NP_568166.1    | 2-cys peroxiredoxin, chloroplast, putative               | <i>Arabidopsis thaliana</i>                | group 1 | VLLFFYPLDFTFVCPTEVSVSHLAWVQIDRSVGLGGIALLRGLG  |
|     |          | 11908048  | gb  | AAO41453.1     | AF326871.1 putative 2-cys peroxiredoxin protein          | <i>Arabidopsis thaliana</i>                | group 1 |                                               |
|     |          | 12642866  | gb  | AAO00375.1     | AF339693.1 putative 2-cys peroxiredoxin protein          | <i>Arabidopsis thaliana</i>                | group 1 |                                               |
|     |          | 15451082  | gb  | AAK96812.1     | 2-cys peroxiredoxin-like protein                         | <i>Arabidopsis thaliana</i>                | group 1 |                                               |
|     |          | 201463449 | gb  | AAIM10065.1    | 2-cys peroxiredoxin-like protein                         | <i>Arabidopsis thaliana</i>                | group 1 |                                               |
| 340 | 0        | 124515015 | gb  | EAY56526.1     | Peroxiredoxin                                            | <i>Leptospiillum sp. Group II USA</i>      | group 1 | FFWPLDFTFVCPTEVSVTHLAWKKTPEGGIGVLLVESVALRGLG  |
| 341 | 0        | 56477933  | ref | YP_159522.1    | predicted peroxiredoxin                                  | <i>Azococcus sp. Ebn1</i>                  | group 1 | VLVFFYPLDFTFVCPSEVSIHNAWRNTPVSGIGGGVAFRGLG    |
|     |          | 56313976  | emb | CAI06621.1     | predicted peroxiredoxin                                  | <i>Azococcus sp. Ebn1</i>                  | group 1 |                                               |
| 342 | 1.49E-11 | 145568715 | ref | YP_001156312.1 | alkyl hydroperoxide reductase/Thiol specific antioxidant | <i>Oryzuela bacter sp. QLW-P1DMWA-1</i>    | group 2 | IFMPAAFTFVCPTEVSHKWHETSPVKGKAGLALRGEIGIKYSE   |
|     |          | 145048121 | ref | ABP34748.1     | alkyl hydroperoxide reductase/Thiol specific antioxidant | <i>Oryzuela bacter sp. QLW-P1DMWA-1</i>    | group 2 |                                               |
| 343 | 0        | 146831053 | gb  | ABP59556.1     | alkyl hydroperoxide reductase/Thiol specific antioxidant | <i>Oryzuela bacter sp. 638</i>             | group 1 | VLVFFYPLDFTFVCPSEVSIHNAWRNTPVKGIGGGVAFRGLG    |
|     |          | 145317409 | gb  | ABP59556.1     | alkyl hydroperoxide reductase/Thiol specific antioxidant | <i>Oryzuela bacter sp. 638</i>             | group 1 |                                               |
| 344 | 2.63E-11 | 15605333  | gb  | NP_220119.1    | Thio-Specific Antioxidant (TSA) Peroxidase               | <i>Chlamydia trachomatis D/UW-3/CX</i>     | group 4 | ISLFFYPKDFTYVCPTEVLGTHSRWLAVARAGGIEGSLALRA    |
|     |          | 3329048   | gb  | AAO68206.1     | Thio-Specific Antioxidant (TSA) Peroxidase               | <i>Chlamydia trachomatis D/UW-3/CX</i>     | group 4 |                                               |
|     |          | 158148188 | emb | CAP08900.1     | Thio-Specific Antioxidant (TSA) Peroxidase               | <i>Chlamydia trachomatis</i>               | group 4 |                                               |
|     |          | 158148192 | emb | CAP08900.1     | Thio-Specific Antioxidant (TSA) Peroxidase               | <i>Chlamydia trachomatis</i>               | group 4 |                                               |
|     |          | 158148194 | emb | CAP08900.1     | Thio-Specific Antioxidant (TSA) Peroxidase               | <i>Chlamydia trachomatis</i>               | group 4 |                                               |
|     |          | 158148196 | emb | CAP08900.1     | Thio-Specific Antioxidant (TSA) Peroxidase               | <i>Chlamydia trachomatis</i>               | group 4 |                                               |
|     |          | 158148198 | emb | CAP08900.1     | Thio-Specific Antioxidant (TSA) Peroxidase               | <i>Chlamydia trachomatis</i>               | group 4 |                                               |
|     |          | 158148200 | emb | CAP08900.1     | Thio-Specific Antioxidant (TSA) Peroxidase               | <i>Chlamydia trachomatis</i>               | group 4 |                                               |
|     |          | 158148202 | emb | CAP08900.1     | Thio-Specific Antioxidant (TSA) Peroxidase               | <i>Chlamydia trachomatis</i>               | group 4 |                                               |

|     |           |     |             |                                                          |                                                          |                                           |         |                                               |  |
|-----|-----------|-----|-------------|----------------------------------------------------------|----------------------------------------------------------|-------------------------------------------|---------|-----------------------------------------------|--|
| 345 | 158148204 | emb | CAP08908.1  | Thio-Specific Antioxidant (TSA) Peroxidase               | Chlamydia trachomatis                                    |                                           |         |                                               |  |
|     | 16923958  | ref | NP_476455.1 | peroxidoxin 1                                            | Rattus norvegicus                                        | group 1                                   |         | FFYPLDFTFVCPTEVDSCHLAWMINTPKQGGGLGVLKEGISFRG  |  |
|     | 2498470   | dbi | O637.16     | PRDX1_RAT Peroxidoxin-1 (Thio redoxin peroxidase)        | Rattus norvegicus                                        |                                           |         |                                               |  |
|     | 1060977   | dbi | BAA06275.1  | heme-binding 23 kDa protein (HBP23)                      | Rattus norvegicus                                        |                                           |         |                                               |  |
|     | 34849851  | gb  | AAH88450.1  | Peroxidoxin 1                                            | Rattus norvegicus                                        |                                           |         |                                               |  |
|     | 56789700  | gb  | AAH88118.1  | Peroxidoxin 1                                            | Rattus norvegicus                                        |                                           |         |                                               |  |
|     | 149035583 | gb  | EDL902864.1 | TCG5201                                                  | Rattus norvegicus                                        | group 3                                   |         | VLTVSLFAWPKDFTFVCPTEVSHHAWPKOHDDGFAKRAAGSVG   |  |
| 346 | 9.91E-13  |     | 4927942     | AF1275676_1 alkyl hydroperoxide reductase                | Streptomyces viridosporus                                | group 1                                   |         | FFYPLDFTFVCPTEVSVSHLAWMINTPRNGGLGVLLAGIALRG   |  |
| 347 | 0         |     | 118597399   | PRDX3_RAT Thio redoxin-dependent peroxidase              | Rattus norvegicus                                        | group 1                                   |         | FFYPLDFTFVCPTEVSVVCHLAWMINTPRSSGGGLVLLPGIALRG |  |
|     | 0         |     | 71896087    | prdx3 protein                                            | Xenopus tropicalis                                       | group 1                                   |         | FFYPLDFTFVCPTEVSVVCHLAWMINTPRSSGGGLVLLPGIALRG |  |
|     | 0         |     | 60551816    | prdx3 protein                                            | Xenopus tropicalis                                       | group 1                                   |         | VGKFFYPLDFTFVCPSEVSVSHLAWMINTPKHGGGLGDGIALRG  |  |
| 349 | 0         |     | 51473523    | thioredoxin peroxidase I                                 | Rickettsia typhi str. Wilmington                         | group 1                                   |         | VLVFFYPLDFTFVCPSEVSVTHNAWRNTPVKGKIGAGVALRG    |  |
|     | 0         |     | 51459835    | thioredoxin peroxidase I                                 | Rickettsia typhi str. Wilmington                         | group 1                                   |         |                                               |  |
|     | 0         |     | 153207542   | antioxidant, AhpC/IT sa family                           | Coxiella burnetii RSA 334                                | group 1                                   |         |                                               |  |
|     | 0         |     | 165918351   | antioxidant, AhpC/IT sa family                           | Coxiella burnetii RSA 334                                | group 1                                   |         |                                               |  |
|     | 0         |     | 120576510   | EAx33134.1                                               | Coxiella burnetii MSU Goat Q177'                         | group 1                                   |         |                                               |  |
|     | 0         |     | 121543961   | ABM5645.1                                                | Coxiella burnetii RSA 334                                | group 1                                   |         | FFYPLDFTFVCPTEGDSCHLAWMINTPROGGLGTGIPFRGSMK   |  |
|     | 0         |     | 165918001   | EDR36605.1                                               | antioxidant, AhpC/IT sa family                           | group 1                                   |         | FFYPLDFTFVCPTEVSVSHLAWMINTPRNGGLGVLLSGLALRG   |  |
|     | 0         |     | 114633017   | XP_001153938.1                                           | putative cytosolic thioredoxin peroxidase                | group 2                                   |         | FFYPADFTFVCPTEVSVTHKAWHSSSEEGADRAAEGIGVKG     |  |
|     | 0         |     | 7576552     | PREDICTED: peroxidoxin 3 isoform 1                       | Pan troglodytes                                          |                                           |         |                                               |  |
|     | 0         |     | 7576553     | A Chain A, Structural And Biochemical Analysis Of The    | Salmonella typhimurium                                   |                                           |         |                                               |  |
|     | 0         |     | 7576554     | B Chain B, Structural And Biochemical Analysis Of The    | Salmonella typhimurium                                   |                                           |         |                                               |  |
|     | 0         |     | 7576555     | C Chain C, Structural And Biochemical Analysis Of The    | Salmonella typhimurium                                   |                                           |         |                                               |  |
|     | 0         |     | 7576556     | D Chain D, Structural And Biochemical Analysis Of The    | Salmonella typhimurium                                   |                                           |         |                                               |  |
|     | 0         |     | 7576557     | E Chain E, Structural And Biochemical Analysis Of The    | Salmonella typhimurium                                   |                                           |         |                                               |  |
|     | 0         |     | 7576558     | F Chain F, Structural And Biochemical Analysis Of The    | Salmonella typhimurium                                   |                                           |         |                                               |  |
|     | 0         |     | 7576559     | G Chain G, Structural And Biochemical Analysis Of The    | Salmonella typhimurium                                   |                                           |         |                                               |  |
|     | 0         |     | 7576560     | H Chain H, Structural And Biochemical Analysis Of The    | Salmonella typhimurium                                   |                                           |         |                                               |  |
|     | 0         |     | 7576561     | I Chain I, Structural And Biochemical Analysis Of The    | Salmonella typhimurium                                   |                                           |         |                                               |  |
|     | 0         |     | 7576561     | J Chain J, Structural And Biochemical Analysis Of The    | Salmonella typhimurium                                   |                                           |         |                                               |  |
| 354 | 5.62E-14  |     | 158936      | AAA29095.1                                               | cysteine-rich surface antigen                            | group 1                                   |         | RIKAFKFINLIFYPLDFTFVCPTEQLKVSVKGGVGGAGIARRG   |  |
|     | 0         |     | 124023166   | thioredoxin peroxidase                                   | Prochlorococcus marinus str. MIT 9303                    | group 1                                   |         | FFYPLDFTFVCPTEVILGSHLAWIQTSREGGLGISTAGVALRG   |  |
|     | 0         |     | 123963452   | ABM78208.1                                               | Prochlorococcus marinus str. MIT 9303                    | group 1                                   |         |                                               |  |
| 356 | 0         |     | 91086349    | XP_970797.1                                              | Tribolium castaneum                                      | group 1                                   |         | FFYPLDFTFVCPTECSTSHLAWMINTPRQGGGLVLDAGVTFRRG  |  |
| 357 | 0         |     | 120599227   | ref                                                      | YP_963801.1                                              | group 1                                   |         | VLVFFYPLDFTFVCPSEVSVTHNAWRNTPVKGKIGAGVAFRRG   |  |
|     | 0         |     | 124549550   | alkyl hydroperoxide reductase/Thiol specific antioxidant | Shewanella sp. W3-18-1                                   |                                           |         |                                               |  |
|     | 0         |     | 146292699   | ref                                                      | YP_01707728.1                                            |                                           |         |                                               |  |
|     | 0         |     | 120559320   | ABM25247.1                                               | alkyl hydroperoxide reductase/Thiol specific antioxidant | Shewanella putrefaciens CN-32             |         |                                               |  |
|     | 0         |     | 124507834   | EA51948.1                                                | alkyl hydroperoxide reductase/Thiol specific antioxidant | Shewanella putrefaciens CN-32             |         |                                               |  |
|     | 0         |     | 145564389   | ABP75324.1                                               | alkyl hydroperoxide reductase/Thiol specific antioxidant | Shewanella putrefaciens CN-32             |         |                                               |  |
|     | 0         |     | 60686276    | AAH91544.1                                               | Prdx3 protein                                            | Danio rerio                               | group 1 | FFYPLDFTFVCPTEVSVTHLAWMINTPRSSGGGLVLLPGIALRG  |  |
|     | 0         |     | 17157991    | ref                                                      | NP_477510.1                                              | group 1                                   |         | FFYPLDFTFVCPTECSTSHLAWMINTPRQGGGLVLDGTGIPRRG  |  |
|     | 0         |     | 124641739   | ref                                                      | NP_727689.1                                              |                                           |         |                                               |  |
|     | 0         |     | 27734441    | sp                                                       | O9V3P0                                                   |                                           |         |                                               |  |
|     | 0         |     | 7230426     | AAE2985.1                                                | AF167088_1 thioredoxin peroxidase 1                      | Drosophila melanogaster                   |         |                                               |  |
|     | 0         |     | 12744769    | AAK06770.1                                               | AF-321615_1 cytosolic thioredoxin peroxidase variant 2   | Drosophila melanogaster                   |         |                                               |  |
|     | 0         |     | 12744791    | AAK06771.1                                               | AF-321616_1 cytosolic thioredoxin peroxidase variant 2   | Drosophila melanogaster                   |         |                                               |  |
|     | 0         |     | 7292861     | AAE48253.1                                               | CG1633-PA, isoform A                                     | Drosophila melanogaster                   |         |                                               |  |
|     | 0         |     | 17944221    | AA148005.1                                               | GM14788p                                                 | Drosophila melanogaster                   |         |                                               |  |
|     | 0         |     | 47271168    | AA127254.1                                               | SD27832p                                                 | Drosophila melanogaster                   |         |                                               |  |
| 360 | 0         |     | 149907723   | ref                                                      | XP_01896470.1                                            | group 1                                   |         | VLVFFYPLDFTFVCPSEVSVSHNAWRNITSIDGGIGAGVAFRRG  |  |
|     | 0         |     | 149809393   | EDM89322.1                                               | alkyl hydroperoxide reductase C22 protein                | Moritella sp. PE36                        | group 1 | FFYPADFTFVCPTEVSTTHKAWHSSSEEGADRAAEGIGVKG     |  |
| 361 | 0         |     | 75765537    | 1YEP                                                     | A Chain A, Structural And Biochemical Analysis Of The    | Salmonella typhimurium                    | group 2 |                                               |  |
|     | 0         |     | 75765538    | 1YEP                                                     | B Chain B, Structural And Biochemical Analysis Of The    | Salmonella typhimurium                    |         |                                               |  |
|     | 0         |     | 75765539    | 1YEP                                                     | C Chain C, Structural And Biochemical Analysis Of The    | Salmonella typhimurium                    |         |                                               |  |
|     | 0         |     | 75765540    | 1YEP                                                     | D Chain D, Structural And Biochemical Analysis Of The    | Salmonella typhimurium                    |         |                                               |  |
|     | 0         |     | 75765541    | 1YEP                                                     | E Chain E, Structural And Biochemical Analysis Of The    | Salmonella typhimurium                    |         |                                               |  |
| 362 | 0         |     | 37622727    | ref                                                      | NP_926104.1                                              | group 1                                   |         | FFYPLDFTFVCPTEVILGCDSSSHAWMISTPREGYSQRGGGIC   |  |
|     | 0         |     | 35213729    | dbi                                                      | BAC91089.1                                               | gll3158                                   | group 1 |                                               |  |
| 363 | 6.86E-16  |     | 124008543   | ref                                                      | XP_01691376.1                                            | group 3                                   |         | FVWPKDFTFVCPTEVSHLAWRNHDLRGLKENIARVSVVLD      |  |
|     | 0         |     | 123987956   | gb                                                       | EA427636.1                                               | alkylhydroperoxide reductase              | group 1 |                                               |  |
|     | 0         |     | 7339588     | emb                                                      | CABR2860.1                                               | 2-Cys-peroxidoxin                         | group 2 |                                               |  |
| 364 | 0         |     | 28901538    | ref                                                      | NP_801193.1                                              | alkyl hydroperoxide reductase c22 protein | group 1 | FFYPLDFTFVCPTEVSTSHLAWIQTDSSGGGLVLIQIALRG     |  |
| 365 | 0         |     | 153838449   | ref                                                      | XP_0191116.1                                             | peroxidoxin                               | group 2 | VLGFFYPADFTFVCPTEVSTTHKAWHDSSEQGLADRAAEGIG    |  |
|     | 0         |     | 28810085    | dbi                                                      | BAC63026.1                                               | alkyl hydroperoxide reductase c22 protein |         |                                               |  |
|     | 0         |     | 149748169   | gb                                                       | EDM85028.1                                               | peroxidoxin                               |         |                                               |  |
| 366 | 0         |     | 159903445   | ref                                                      | YP_001550789.1                                           | thioredoxin peroxidase                    | group 1 | FFYPLDFTFVCPTEVILGVDSSHLAWIQTDQRDGGIGEGVALRG  |  |

|     |          |            |     |                |                                                              |                                             |  |         |                                              |
|-----|----------|------------|-----|----------------|--------------------------------------------------------------|---------------------------------------------|--|---------|----------------------------------------------|
| 367 | 4.40E-12 | 159888621  | gb  | ABX08835.1     | thioredoxin peroxidase                                       | Prochlorococcus marinus str. MIT 9211       |  | group 2 | WSVIFMPAAFTFNCPITESHKAWHEITSPYKGEGLALRGEQGVK |
|     |          | 119897060  | ref | YP_932273.1    | alkyl hydroperoxidase reductase subunit C                    | Azarcus sp. BH72                            |  | group 2 | FFYPADFTFVCPTEVSTTHKAWHDTSDVMIDGLALRGDLGIG   |
| 368 | 0        | 119869473  | emb | CAL93386.1     | alkyl hydroperoxidase reductase subunit C                    | Azarcus sp. BH72                            |  | group 2 | FFYPADFTFVCPTEVSTTHKAWHDTSDVMIDGLALRGDLGIG   |
|     |          | 153002026  | ref | YP_001367707.1 | alkyl hydroperoxidase reductase/ Thiol specific antioxidant  | Shewanella baltica OS185                    |  |         |                                              |
|     |          | 160876744  | ref | YP_001586060.1 | peroxiredoxin                                                | Shewanella baltica OS195                    |  |         |                                              |
|     |          | 160862266  | gb  | ABX50800.1     | peroxiredoxin                                                | Shewanella baltica OS195                    |  |         |                                              |
| 369 | 0        | 1617118    | emb | CAAS7764.1     | TSA                                                          | Shewanella baltica OS195                    |  | group 1 | ISSFFYPDLDFVCPTEVLSHLAWVQTDRLSGLGGGIALRG     |
| 370 | 0        | 21592588   | gb  | AAAM64537.1    | putative 2-oxo peroxidoreductin BAS1 precursor (thiol-sp)    | Arabisopsis thaliana                        |  | group 1 | VLVFFYPLDFTFVCPSEVSIHNAWRNIPVKGGGAGVAFRG     |
| 371 | 0        | 127512445  | ref | ABO23383.1     | alkyl hydroperoxidase reductase/ Thiol specific antioxidant  | Shewanella loihica PV-4                     |  | group 1 | FFYPDLDFTFVCPTECVSHLAWINSPREGGLGVLEGHHLRG    |
| 372 | 0        | 15637725   | ref | XP_001630757.1 | alkyl hydroperoxidase reductase/ Thiol specific antioxidant  | Shewanella loihica PV-4                     |  | group 1 | FFYPDLDFTFVCPTECVSHLAWINSPREGGLGVLEGHHLRG    |
|     |          | 156217784  | gb  | EDO38694.1     | predicted protein                                            | Nematostella vectensis                      |  | group 1 | FFYPDLDFTFVCPTEVSTHAWINTPREGGLGVLEKGIAYRG    |
| 374 | 0        | 34849738   | gb  | AAH88481.1     | Peroxiredoxin 2                                              | Rattus norvegicus                           |  | group 1 | FFYPDLDFTFVCPTEVSTHAWINTPREGGLGVLEKGIAYRG    |
|     |          | 149037815  | gb  | EDJ92175.1     | RC5Y106, isoform CRA_d                                       | Rattus norvegicus                           |  | group 1 | FFYPDLDFTFVCPTEVSTHAWINTPREGGLGVLEKGIAYRG    |
| 375 | 1.25E-24 | 67083703   | gb  | AAV68786.1     | mitochondrial truncated thioredoxin-dependent peroxidase     | Xodes scapularis                            |  | group 1 | VLKFFYPLDFVCPTEVSVSHLAWNTNPROGGLGAGLALRG     |
| 376 | 0        | 134295970  | ref | YP_001119705.1 | alkyl hydroperoxidase reductase/ Thiol specific antioxidant  | Burkholderia vietnamiensis G4               |  | group 3 | YFYPKDFTFVCPTEVLLVYLAWRRRHKFGDYKAGVALRAVS    |
|     |          | 134139127  | gb  | ABO54870.1     | alkyl hydroperoxidase reductase/ Thiol specific antioxidant  | Burkholderia vietnamiensis G4               |  | group 1 | VLVFFYPLDFTFVCPSEVSTHAWINRTPKGGIGAAVAYRG     |
| 377 | 4.29E-19 | 53804842   | ref | YP_113499.1    | antioxidant, AhpC/Tsa family protein                         | Methylococcus capsulatus str. Bath          |  | group 1 | FFYPADFTFVCPTEVSTHAWINRTPKGGIGAAVAYRG        |
|     |          | 53758603   | gb  | AAU92894.1     | antioxidant, AhpC/Tsa family protein                         | Methylococcus capsulatus str. Bath          |  | group 2 | FFYPADFTFVCPTEVSTHAWINRTPKGGIGAAVAYRG        |
| 378 | 0        | 154493907  | ref | YP_02033227.1  | hypothetical protein PARMER_03251                            | Parabacteroides merdae ATCC 43184           |  | group 1 | FFYPADFTFVCPTEVSTHAWINRTPKGGIGAAVAYRG        |
|     |          | 87124628   | ref | YP_01080476.1  | hypothetical protein PARMER_03251                            | Parabacteroides merdae ATCC 43184           |  | group 1 | FFYPADFTFVCPTEVSTHAWINRTPKGGIGAAVAYRG        |
| 379 | 0        | 154086167  | gb  | EDN85212.1     | thioredoxin peroxidase                                       | Synechococcus sp. R39917                    |  | group 1 | FFYPDLDFTFVCPTEVSGVSSHAWIQTPRQGGIGEGVALRG    |
| 380 | 1.48E-21 | 123498272  | ref | EAQ68766.1     | thioredoxin peroxidase, putative                             | Synechococcus sp. R39917                    |  | group 1 | FFYPDLDFTFVCPTEVSGVSSHAWIQTPRQGGIGEGVALRG    |
|     |          | 121908848  | gb  | EAY14705.1     | tyrosine peroxidase, putative                                | Trichomonas vaginalis G3                    |  | group 1 | FFYPDLDFTFVCPTEVSGVSSHAWIQTPRQGGIGEGVALRG    |
| 381 | 2.03E-16 | 68835220   | ref | YP_248925.1    | tyrosine peroxidase, putative                                | Trichomonas vaginalis G3                    |  | group 2 | FFYPDLDFTFVCPTEVSGVSSHAWIQTPRQGGIGEGVALRG    |
|     |          | 68262819   | emb | CAI36307.1     | alkyl hydroperoxidase reductase                              | Corynebacterium jeikeium K411               |  | group 1 | FFYPDLDFTFVCPTEVSGVSSHAWIQTPRQGGIGEGVALRG    |
| 382 | 0        | 45360655   | ref | NP_989001.1    | alkyl hydroperoxidase reductase                              | Corynebacterium jeikeium K411               |  | group 1 | FFYPDLDFTFVCPTEVSGVSSHAWIQTPRQGGIGEGVALRG    |
|     |          | 38174215   | gb  | AAH61276.1     | Peroxiredoxin 2                                              | Xenopus tropicalis                          |  | group 1 | FFYPDLDFTFVCPTEVSGVSSHAWIQTPRQGGIGEGVALRG    |
|     |          | 89268923   | emb | CAJ82908.1     | Peroxiredoxin 2                                              | Xenopus tropicalis                          |  | group 1 | FFYPDLDFTFVCPTEVSGVSSHAWIQTPRQGGIGEGVALRG    |
| 383 | 0        | 1145717426 | ref | YP_758106.1    | alkyl hydroperoxidase reductase/ Thiol specific antioxidant  | Marticola maris MC510                       |  | group 3 | MLGIGFFYPKDFTFVCPTECKLAWRRRHPIDSEGVAYRAVL    |
|     |          | 114341888  | gb  | ABM67168.1     | alkyl hydroperoxidase reductase/ Thiol specific antioxidant  | Marticola maris MC510                       |  | group 1 | MLGIGFFYPKDFTFVCPTECKLAWRRRHPIDSEGVAYRAVL    |
| 384 | 0        | 119509654  | ref | YP_01628800.1  | alkyl hydroperoxidase reductase/ Thiol specific antioxidant  | Nodularia spumigena CCY9414                 |  | group 1 | FFYPDLDFTFVCPTEVSGVSSHAWIQTPRQGGIGEGVALRG    |
|     |          | 119465673  | gb  | EAW46564.1     | alkyl hydroperoxidase reductase/ Thiol specific antioxidant  | Nodularia spumigena CCY9414                 |  | group 4 | FFYPDLDFTFVCPTEVSGVSSHAWIQTPRQGGIGEGVALRG    |
| 386 | 4.49E-16 | 163758961  | ref | YP_02164068.1  | alkyl hydroperoxidase reductase, subunit C                   | Kordia algicida OT-1                        |  | group 1 | FFYPDLDFTFVCPTEVSGVSSHAWIQTPRQGGIGEGVALRG    |
|     |          | 161323080  | gb  | EDP94422.1     | alkyl hydroperoxidase reductase, subunit C                   | Kordia algicida OT-1                        |  | group 1 | FFYPDLDFTFVCPTEVSGVSSHAWIQTPRQGGIGEGVALRG    |
| 387 | 0        | 157146891  | ref | YP_001454300.1 | hypothetical protein CKO_02758                               | Citrobacter koseri ATCC BAA-895             |  | group 1 | FFYPDLDFTFVCPTEVSGVSSHAWIQTPRQGGIGEGVALRG    |
|     |          | 157084186  | gb  | ABY13864.1     | hypothetical protein CKO_02758                               | Citrobacter koseri ATCC BAA-895             |  | group 1 | FFYPDLDFTFVCPTEVSGVSSHAWIQTPRQGGIGEGVALRG    |
| 388 | 0        | 157105671  | ref | XP_001648972.1 | peroxiredoxins, prx-1, prx-2, prx-3                          | Aedes aegypti                               |  | group 1 | FFYPDLDFTFVCPTEVSGVSSHAWIQTPRQGGIGEGVALRG    |
|     |          | 108868966  | gb  | EAT133191.1    | peroxiredoxins, prx-1, prx-2, prx-3                          | Aedes aegypti                               |  | group 1 | FFYPDLDFTFVCPTEVSGVSSHAWIQTPRQGGIGEGVALRG    |
| 389 | 0        | 29337026   | gb  | Q8T76C.1       | TDX, ECHGR, Thioredoxin peroxidase (Peroxiredoxin)           | Echinococcus granulosus                     |  | group 1 | FFYPDLDFTFVCPTEVSGVSSHAWIQTPRQGGIGEGVALRG    |
|     |          | 19073473   | gb  | AAJ84833.1     | AF-478688, 1 Thioredoxin peroxidase                          | Echinococcus granulosus                     |  | group 1 | FFYPDLDFTFVCPTEVSGVSSHAWIQTPRQGGIGEGVALRG    |
| 390 | 0        | 118701617  | ref | YP_01559672.1  | alkyl hydroperoxidase reductase/ Thiol specific antioxidant  | Burkholderia ambifaria MCA0-6               |  | group 3 | FFYPDLDFTFVCPTEVSGVSSHAWIQTPRQGGIGEGVALRG    |
|     |          | 118640899  | gb  | EAIV4756.1     | alkyl hydroperoxidase reductase/ Thiol specific antioxidant  | Burkholderia ambifaria MCA0-6               |  | group 1 | FFYPDLDFTFVCPTEVSGVSSHAWIQTPRQGGIGEGVALRG    |
| 391 | 2.45E-15 | 50303323   | ref | XP_451603.1    | unnamed protein product                                      | Kluyveromyces fragilis                      |  | group 1 | FFYPDLDFTFVCPTEVSGVSSHAWIQTPRQGGIGEGVALRG    |
|     |          | 49840735   | emb | CAH01998.1     | unnamed protein product                                      | Kluyveromyces fragilis NRRL Y-1140          |  | group 1 | FFYPDLDFTFVCPTEVSGVSSHAWIQTPRQGGIGEGVALRG    |
| 392 | 6.47E-14 | 118398387  | ref | YP_001031522.1 | AhpC/TSA family protein                                      | Tetrahymena thermophila SB210               |  | group 1 | FFYPDLDFTFVCPTEVSGVSSHAWIQTPRQGGIGEGVALRG    |
|     |          | 89288682   | gb  | EAR83859.1     | AhpC/TSA family protein                                      | Tetrahymena thermophila SB210               |  | group 1 | FFYPDLDFTFVCPTEVSGVSSHAWIQTPRQGGIGEGVALRG    |
| 393 | 0        | 46445658   | ref | YP_007023.1    | probable proteins related to alkyl hydroperoxidase reductase | Candidatus Protochlamydia amoebophila UWE25 |  | group 1 | FFYPDLDFTFVCPTEVSGVSSHAWIQTPRQGGIGEGVALRG    |
|     |          | 46399299   | emb | CAF2748.1      | probable proteins related to alkyl hydroperoxidase reductase | Candidatus Protochlamydia amoebophila UWE25 |  | group 2 | FFYPDLDFTFVCPTEVSGVSSHAWIQTPRQGGIGEGVALRG    |
| 394 | 1.63E-16 | 78062802   | ref | YP_372710.1    | alkyl hydroperoxidase reductase/ Thiol specific antioxidant  | Burkholderia sp. 383                        |  | group 3 | FFYPDLDFTFVCPTEVSGVSSHAWIQTPRQGGIGEGVALRG    |
|     |          | 77970687   | gb  | ABB12066.1     | alkyl hydroperoxidase reductase/ Thiol specific antioxidant  | Burkholderia sp. 383                        |  | group 1 | FFYPDLDFTFVCPTEVSGVSSHAWIQTPRQGGIGEGVALRG    |
| 395 | 0        | 54298241   | ref | YP_124610.1    | hypothetical protein Ipp2299                                 | Legionella pneumophila str. Paris           |  | group 1 | FFYPDLDFTFVCPTEVSGVSSHAWIQTPRQGGIGEGVALRG    |
|     |          | 53752026   | emb | CAH13452.1     | hypothetical protein                                         | Legionella pneumophila str. Paris           |  | group 1 | FFYPDLDFTFVCPTEVSGVSSHAWIQTPRQGGIGEGVALRG    |
| 396 | 0        | 15054517   | gb  | AAK82654.1     | AF205887, 1 peroxidoxin 1                                    | Leishmania donovani                         |  | group 1 | FFYPDLDFTFVCPTEVSGVSSHAWIQTPRQGGIGEGVALRG    |
|     |          | 68235779   | gb  | AAV88226.1     | peroxidoxin/thiol-specific antioxidant                       | Leishmania donovani                         |  | group 1 | FFYPDLDFTFVCPTEVSGVSSHAWIQTPRQGGIGEGVALRG    |
| 397 | 0        | 32267043   | ref | NP_861075.1    | alkyl hydroperoxidase reductase 1 sea                        | Helicobacter hepaticus ATCC 51449           |  | group 1 | FFYPDLDFTFVCPTEVSGVSSHAWIQTPRQGGIGEGVALRG    |
|     |          | 32263095   | gb  | AAFP78141.1    | alkyl hydroperoxidase reductase 1 sea                        | Helicobacter hepaticus ATCC 51449           |  | group 1 | FFYPDLDFTFVCPTEVSGVSSHAWIQTPRQGGIGEGVALRG    |
| 398 | 0        | 2829687    | sp  | P80602         | BAST, WHEAT 2-Cys peroxidoreductin BAS1, chloroplas          | Triticum aestivum                           |  | group 1 | FFYPDLDFTFVCPTEVSGVSSHAWIQTPRQGGIGEGVALRG    |
|     |          | 18053511   | dbj | BAA19099.1     | Thiol-specific antioxidant protein                           | Triticum aestivum                           |  | group 2 | FFYPDLDFTFVCPTEVSGVSSHAWIQTPRQGGIGEGVALRG    |
| 399 | 0        | 114651081  | ref | YP_749221.1    | alkyl hydroperoxidase reductase/ Thiol specific antioxidant  | Shewanella frigidimarina NCIMB 400          |  | group 1 | FFYPDLDFTFVCPTEVSGVSSHAWIQTPRQGGIGEGVALRG    |
|     |          | 114333001  | gb  | ABI70383.1     | alkyl hydroperoxidase reductase/ Thiol specific antioxidant  | Shewanella frigidimarina NCIMB 400          |  | group 1 | FFYPDLDFTFVCPTEVSGVSSHAWIQTPRQGGIGEGVALRG    |
| 400 | 0        | 3603241    | gb  | AAAC3544.1     | type II peroxidoxin 1                                        | Mus musculus                                |  | group 1 | FFYPDLDFTFVCPTEVSGVSSHAWIQTPRQGGIGEGVALRG    |
| 401 | 3.11E-16 | 88795270   | ref | YP_01110969.1  | Peroxiredoxin                                                | Asteromonas macleodii 'Deep ecotype'        |  | group 2 | FFYPDLDFTFVCPTEVSGVSSHAWIQTPRQGGIGEGVALRG    |
|     |          | 88773392   | gb  | EAR04658.1     | Peroxiredoxin                                                | Asteromonas macleodii 'Deep ecotype'        |  | group 1 | FFYPDLDFTFVCPTEVSGVSSHAWIQTPRQGGIGEGVALRG    |
| 402 | 0        | 17224953   | gb  | AAJ37182.1     | AF320771, 1 tyrosine peroxidase                              | Trypanosoma cruzi                           |  | group 1 | FFYPDLDFTFVCPTEVSGVSSHAWIQTPRQGGIGEGVALRG    |
| 403 | 4.33E-14 | 165897429  | gb  | EDR24593.1     | hypothetical protein, conserved                              | Entamoeba dispar SAW760                     |  | group 1 | FFYPDLDFTFVCPTEVSGVSSHAWIQTPRQGGIGEGVALRG    |
| 404 | 5.79E-14 | 165904391  | gb  | EDR29619.1     | hypothetical protein, conserved                              | Entamoeba dispar SAW760                     |  | group 1 | FFYPDLDFTFVCPTEVSGVSSHAWIQTPRQGGIGEGVALRG    |
| 405 | 0        | 147906188  | ref | NP_001086130.1 | MGC83969 protein                                             | Xenopus laevis                              |  | group 1 | FFYPDLDFTFVCPTEVSGVSSHAWIQTPRQGGIGEGVALRG    |
|     |          | 49259209   | gb  | AAH14236.1     | MGC83969 protein                                             | Xenopus laevis                              |  | group 1 | FFYPDLDFTFVCPTEVSGVSSHAWIQTPRQGGIGEGVALRG    |

|     |          |           |     |                |                                                                                              |                                                          |         |                                               |
|-----|----------|-----------|-----|----------------|----------------------------------------------------------------------------------------------|----------------------------------------------------------|---------|-----------------------------------------------|
| 406 | 0        | 15131688  | emb | CAC48323.1     | 2-Cys peroxiredoxin                                                                          | <i>Pisum sativum</i>                                     | group 1 | FFYPLDFTFVCPTEVSVSHLAWVQSDRSRGGGLGVLLQGIALLRG |
| 407 | 1.29E-09 | 11467494  | ref | NP_043640.1    | ORE24, ORE24, ODO51 Putative peroxiredoxin yd42 (Thioredoxin)                                | <i>Odonella sinensis</i>                                 | outlier | FFYPANFAISPTSEISVSHLQYLQVLCNREGGLEVLTEGLAFPG  |
|     |          | 13517689  | emb | E49537         | YCF42, ODO51 Putative peroxiredoxin yd42 (Thioredoxin)                                       | <i>Odonella sinensis</i>                                 |         |                                               |
|     |          | 1185189   | emb | CA9A9187.1     | ORF204, homologous to Forphyra ORF199                                                        | <i>Odonella sinensis</i>                                 |         |                                               |
| 408 | 2.48E-16 | 107028623 | ref | YP_6247.34.1   | alkyl hydroperoxide reductase/Thiol specific antioxidant/Burkholderia cenocepacia AU 1054    |                                                          | group 2 | VFPADFTFVCPTEVSTTHKAWHDTSDVLLIEGMALRGDNGIG    |
|     |          | 116892187 | ref | YP_8247.34.1   | alkyl hydroperoxide reductase/Thiol specific antioxidant/Burkholderia cenocepacia HI2424     |                                                          |         |                                               |
|     |          | 11871370  | ref | ZP_01566333.1  | alkyl hydroperoxide reductase/Thiol specific antioxidant/Burkholderia cenocepacia MC0-3      |                                                          |         |                                               |
|     |          | 105895997 | gb  | ABE719.16.1.1  | alkyl hydroperoxide reductase/Thiol specific antioxidant/Burkholderia cenocepacia AU 1054    |                                                          |         |                                               |
|     |          | 116850187 | gb  | ABK10827.1     | alkyl hydroperoxide reductase/Thiol specific antioxidant/Burkholderia cenocepacia HI2424     |                                                          |         |                                               |
|     |          | 118648681 | gb  | EA9595483.1    | alkyl hydroperoxide reductase/Thiol specific antioxidant/Burkholderia cenocepacia MC0-3      |                                                          |         |                                               |
| 409 | 0        | 60280341  | gb  | AA818168.1     | tryparedoxin peroxidase 1                                                                    | <i>Leishmania guyanensis</i>                             | group 1 | FFYPLDFVCPTECSMAHLQWLTQERKGGGLGVLDKGVAYVRG    |
| 410 | 0        | 156550783 | ref | XP_016006643.1 | PREDICTED: similar to peroxiredoxins, prx-1, prx-2                                           | <i>Nasonia vitripennis</i>                               | group 1 | VLLFFYPDLDFVCPTEVSDTHLAWINTPREGGGLGHLTLRA     |
| 411 | 0        | 56754497  | gb  | AAW254336.1    | SJCHGC01281 protein                                                                          | <i>Schistosoma japonicum</i>                             | group 1 | FFYPLDFTFVCPTEVSTHAWINTPREGGGLGLGVALRGVLR     |
|     |          | 60279645  | gb  | BAD90103.1     | thioredoxin peroxidase-3                                                                     | <i>Schistosoma japonicum</i>                             |         |                                               |
| 412 | 0        | 157752180 | ref | ZP_001679802.1 | Hypothetical protein CBG02380                                                                | <i>Caenorhabditis briggsae</i> AF16                      | group 1 | CSITFFYPDLDFVCPTEVSHLAWINQPRHGGGLGVLDKGIARFRG |
|     |          | 39598861  | emb | CAE95088.1     | Hypothetical protein CBG02380                                                                | <i>Caenorhabditis briggsae</i>                           |         |                                               |
| 413 | 0        | 60835754  | gb  | AA337153.1     | peroxiredoxin 2                                                                              | synthetic construct                                      | group 1 | FFYPLDFTFVCPTEVSVHLAWINTPREGGGLGVLDKGIAYVRG   |
| 414 | 0        | 157366930 | ref | XP_001682020.1 | tryparedoxin peroxidase                                                                      | <i>Leishmania major</i>                                  | group 1 | FFYPLDFSVCPTEDSVLAAHLQWLTQDRKGGGLGGVAYVRG     |
|     |          | 157466938 | ref | XP_001682024.1 | tryparedoxin peroxidase                                                                      | <i>Leishmania major</i>                                  |         |                                               |
|     |          | 157268948 | ref | XP_001682028.1 | tryparedoxin peroxidase                                                                      | <i>Leishmania major</i>                                  |         |                                               |
|     |          | 68125475  | emb | CAJ033332.1    | tryparedoxin peroxidase                                                                      | <i>Leishmania major</i>                                  |         |                                               |
|     |          | 68125479  | emb | CAJ03340.1     | tryparedoxin peroxidase                                                                      | <i>Leishmania major</i>                                  |         |                                               |
| 415 | 8.39E-14 | 123475148 | ref | XP_001320753.1 | AhpC/TSA family protein                                                                      | <i>Trichomonas vaginalis</i> G3                          | group 1 | FSYPLDFTFVCPTECSVHNAWAMTRDGGIGEGEHCILRGVLIH   |
|     |          | 123903565 | gb  | EA908530.1     | AhpC/TSA family protein                                                                      | <i>Trichomonas vaginalis</i> G3                          |         |                                               |
| 416 | 0        | 118077413 | ref | ZP_01539608.1  | alkyl hydroperoxide reductase/Thiol specific antioxidant/Shewanella woodyi ATCC 51608        | <i>Shewanella woodyi</i> ATCC 51608                      | group 2 | FFYPADFTFVCPTEVSTTHKAWHDAWVMDIAGLALRGDLGIG    |
|     |          | 118024088 | gb  | EA937897.1     | alkyl hydroperoxide reductase/Thiol specific antioxidant/Shewanella woodyi ATCC 51608        |                                                          |         |                                               |
| 417 | 0        | 119559781 | gb  | EA949396.1     | peroxiredoxin 3, isoform CRA_a                                                               | <i>Home sapiens</i>                                      | group 1 | FFYPLDFTFVCPTEVSVHLAWINTPRNGGLGVLLSGLALRG     |
| 418 | 0        | 19698783  | gb  | AA191102.1     | thioredoxin peroxidase                                                                       | <i>Acanthocheilium vitaceae</i>                          | group 1 | FFYPLDFTFVCPTECSVSHLAWINTDRMGGGLGVLDKGIAYVRG  |
| 419 | 0        | 162690842 | gb  | ED072702.1     | predicted protein                                                                            | <i>Physcomitrella patens</i> subsp. patens               | group 1 | FFYPLDFTFVCPTEVSTHAWINTDRAGGLGVLLQGIAYVRG     |
| 420 | 0        | 53759099  | gb  | AAU93339.1     | antioxidant                                                                                  | <i>Aeromonas hydrophila</i>                              | group 1 | VLGFYPLDFTFVCPSEVSHNAWRNTKIDGGIGAGVAFRRG      |
| 421 | 0        | 126647203 | ref | ZP_01719713.1  | putative thioredoxin peroxidase                                                              | <i>Algoriphagus</i> sp. PRI                              | group 4 | FFYPKDFVCPTECSVTHLAWLMTPKVLAAPVAYRGNEGVA      |
|     |          | 12657251  | gb  | EA281499.1     | putative thioredoxin peroxidase                                                              | <i>Algoriphagus</i> sp. PRI                              |         |                                               |
| 422 | 2.82E-12 | 86157572  | ref | YP_464357.1    | Alkyl hydroperoxide reductase/Thiol specific antioxidant/Anaeromyxobacter dehalogenans 2CP-C |                                                          | outlier | LSGLALFYPRDFTFVCPTEISVTHRRWEEKLEGVAAARVLE     |
|     |          | 85774083  | gb  | ABC80920.1     | Alkyl hydroperoxide reductase/Thiol specific antioxidant/Anaeromyxobacter dehalogenans 2CP-C |                                                          |         |                                               |
| 423 | 0        | 88794998  | ref | ZP_01110699.1  | antioxidant, AhpC/Tsa family protein                                                         | <i>Alteromonas macleodii</i> 'Deep ecotype'              | group 1 | VLVFFYPLDFTFVCPSEVSHNAWRNTPVQGGIGDGVAFRRG     |
|     |          | 88737228  | gb  | EAR04890.1     | antioxidant, AhpC/Tsa family protein                                                         | <i>Alteromonas macleodii</i> 'Deep ecotype'              |         |                                               |
| 424 | 1.94E-11 | 152981222 | ref | YP_001351729.1 | alkyl hydroperoxide reductase subunit C                                                      | <i>Janthinobacterium</i> sp. Marseille                   | group 2 | IFMPPAAFTNFCPTESHKVVWHETSPYKGEGLSLRQDGVKIVSE  |
|     |          | 151281299 | gb  | ABR89709.1     | alkyl hydroperoxide reductase subunit C                                                      | <i>Janthinobacterium</i> sp. Marseille                   |         |                                               |
| 425 | 0        | 78184723  | ref | YP_377158.1    | thioredoxin peroxidase                                                                       | <i>Synechococcus</i> sp. CC9902                          | group 1 | FFYPLDFTFVCPTEVLGVDSSHLVWIGTARQGGGLGEGVALRG   |
|     |          | 78169017  | gb  | ABB26114.1     | thioredoxin peroxidase                                                                       | <i>Synechococcus</i> sp. CC9902                          |         |                                               |
| 426 | 1.96E-17 | 118399118 | ref | XP_001031885.1 | AhpC/TSA family protein                                                                      | <i>Tetrahymena thermophila</i> SB210                     | group 1 | VLAVFPEDFTYVCPTEITTHLAWIKTPREGGIVGYGAALRG     |
|     |          | 89286220  | gb  | EAR84222.1     | AhpC/TSA family protein                                                                      | <i>Tetrahymena thermophila</i> SB210                     |         |                                               |
| 427 | 0        | 85058620  | ref | YP_454322.1    | putative peroxidase                                                                          | <i>Sodalis glossinidius</i> str. 'morisitans'            | group 1 | VLVNLKFFVPMDFTFVCPSEVHNAWRVPTKGGIGAGVALRG     |
|     |          | 84779140  | gb  | BAE73917.1     | putative peroxidase                                                                          | <i>Sodalis glossinidius</i> str. 'morisitans'            |         |                                               |
| 428 | 0        | 138894584 | ref | YP_001125037.1 | 2-cys peroxiredoxin                                                                          | <i>Geobacillus thermodenitrificans</i> NG380-2           | group 1 | NMKFFYPLDFVCPTEVSTSHKAWMNVPRONGIGEGVALRG      |
|     |          | 134268097 | gb  | ABO6292.1      | 2-cys peroxiredoxin                                                                          | <i>Geobacillus thermodenitrificans</i> NG380-2           |         |                                               |
| 429 | 1.24E-15 | 159109131 | ref | XP_001704832.1 | Peroxioredoxin 1                                                                             | <i>giardia lamblia</i> ATCC 50803                        | group 1 | ISVLTFFYPADFTFVCPSESHHAWCLQNKDGGIGMGLALRA     |
|     |          | 157432905 | gb  | ED077158.1     | Peroxioredoxin 1                                                                             | <i>giardia lamblia</i> ATCC 50803                        |         |                                               |
| 430 | 9.18E-14 | 145698441 | gb  | BAF57015.1     | peroxiredoxin                                                                                | <i>Entamoeba nutilali</i>                                | group 1 | RIKAFKFINLFYPLDWTFCYPTCEQLKYSVKGGVGGAGISRRR   |
| 431 | 0        | 157369301 | ref | YP_001477290.1 | alkyl hydroperoxide reductase/Thiol specific antioxidant/Serratia proteamaculans 568         |                                                          | group 1 | VLVFFWPMDFTFVCPSEVFNHNRKTPVNGGIGAGVALRG       |
|     |          | 157321065 | gb  | ABV40162.1     | alkyl hydroperoxide reductase/Thiol specific antioxidant/Serratia proteamaculans 568         |                                                          |         |                                               |
| 432 | 0        | 152969221 | ref | YP_001334330.1 | alkyl hydroperoxide reductase, C22 subunit, thioredoxin                                      | <i>Klebsiella pneumoniae</i> subsp. pneumoniae MGH 78578 | group 2 | FFYPADFTFVCPTEVSTTHKAWHSSSEEGADRAAEGVGVK      |
|     |          | 150954070 | gb  | ABR176100.1    | alkyl hydroperoxide reductase, C22 subunit, thioredoxin                                      | <i>Klebsiella pneumoniae</i> subsp. pneumoniae MGH 78578 |         |                                               |
| 433 | 2.83E-16 | 45190914  | ref | NP_985168.1    | AER312WP                                                                                     | <i>Ashbya gossypii</i> ATCC 10895                        | group 1 | VSLAFIPLAFVCPTESSLAWNTNIARDGGGLVLIIEGIALRG    |
|     |          | 44983992  | gb  | AA552992.1     | AER312WP                                                                                     | <i>Ashbya gossypii</i> ATCC 10895                        |         |                                               |
| 434 | 0        | 2499471   | sp  | O90384         | TDX_CYNYP Peroxioredoxin (Thioredoxin peroxidase)                                            | <i>Cynops pyrrhogaster</i>                               | group 1 | FFYPLDFTFVCPTEVSDCHLAWTNTSREGGGLGVLDKGIISFRG  |
|     |          | 520853    | gb  | BAAG7054.1     | animal blastomere protein                                                                    | <i>Cynops pyrrhogaster</i>                               |         |                                               |
| 435 | 0        | 148263398 | ref | YP_001230104.1 | alkyl hydroperoxide reductase/Thiol specific antioxidant/Geobacter uranireducens R4          |                                                          | group 1 | ISSFFYPLDFTFVCPTEVSHLAWIKRQDNLKEGVALRGQKTLG   |
|     |          | 146396898 | gb  | ABG25531.1     | alkyl hydroperoxide reductase/Thiol specific antioxidant/Geobacter uranireducens R4          |                                                          |         |                                               |
| 436 | 0        | 145588858 | sp  | G9C9R8         | BAS1B_ARATH 2-Cys peroxiredoxin BAS1-like, chloroArabidopsis thaliana                        |                                                          | group 1 | VLLFFYPDLDFVCPTEVSVSHLAWVQIDRSRGGGLGGGIALRG   |
|     |          | 9758409   | gb  | BAB08951.1     | 2-cys peroxiredoxin-like protein                                                             | <i>Arabidopsis thaliana</i>                              |         |                                               |
| 437 | 0        | 27806083  | ref | NP_776857.1    | Peroxioredoxin 3                                                                             | <i>Bos taurus</i>                                        | group 1 | FFYPLDFTFVCPTEVSVHLAWINTPRNGGLGVLLPLGALRG     |
|     |          | 2507170   | sp  | P35705         | PRDX3_BOVIN Thioredoxin-dependent peroxidase reductase                                       | <i>Bos taurus</i>                                        |         |                                               |
|     |          | 1127071   | gb  | BAA11511.1     | antioxidant protein                                                                          | <i>Bos taurus</i>                                        |         |                                               |
|     |          | 74267970  | gb  | AAU03010.1     | Peroxioredoxin 3                                                                             | <i>Bos taurus</i>                                        |         |                                               |
| 438 | 0        | 146088967 | ref | XP_001465682.1 | peroxiredoxin                                                                                | <i>Leishmania infantum</i> JPCM5                         | group 1 | FFYPMDFTFVCPTEVSCSHLAWNTNTPRKGGGLGVLASGIALRG  |
|     |          | 16751316  | gb  | AA125846.1     | putative mitochondrial peroxiredoxin                                                         | <i>Leishmania infantum</i>                               |         |                                               |
|     |          | 134069782 | emb | CAM68108.1     | peroxiredoxin, tyrosine oxidase                                                              | <i>Leishmania infantum</i>                               |         |                                               |
| 439 | 0        | 15609565  | ref | NP_216944.1    | ALKYL HYDROPEROXIDE REDUCTASE C PROTE1                                                       | <i>Mycobacterium tuberculosis</i> H37Rv                  | group 3 | LLTIGFWPKDFTFVCPTEVSHAHQVWRAGHNDGVADRVLID     |
|     |          | 15841949  | ref | NP_336986.1    | alkyl hydroperoxide reductase C                                                              | <i>Mycobacterium tuberculosis</i> CDC1551                |         |                                               |





|     |          |           |     |                 |                                                                           |                                                                                |  |         |                                              |
|-----|----------|-----------|-----|-----------------|---------------------------------------------------------------------------|--------------------------------------------------------------------------------|--|---------|----------------------------------------------|
| 458 | 1.75E-15 | 62186548  | ref | YP_220333.1     | putative alkyl hydroperoxide reductase                                    | <i>Chlamydomonas</i> S26/3                                                     |  | group 4 | FFYPKDFTVCPTECSVTHQRWLKTDKAGGVKVLDSGLSFRG    |
| 459 | 1.40E-12 | 62148615  | emb | CAH64387.1      | putative alkyl hydroperoxide reductase                                    | <i>Chlamydomonas</i> S26/3                                                     |  | group 1 | MFVPLAFVCPTEILKXWTFQPTIEGGLGYSVMVLLAGHSIRG   |
| 460 | 1.74E-19 | 163770889 | gb  | ED_084566.1     | predicted protein                                                         | <i>Monosiga brevicollis</i> MX1                                                |  | group 2 | VLKVFYPADFTVCPTEVSTSHKAWHDISPGLADRGAEIG      |
| 461 | 1.90E-17 | 71728247  | gb  | EAO304.30.1     | Alkyl hydroperoxide reductase/Thiol specific antioxidant                  | <i>Xyella fastidiosa</i> Amn-1                                                 |  | group 1 | VLVVFYPLDFTVCPSESVTHNAWRNTPIDGGIGGGMFRG      |
| 462 | 3.27E-14 | 94995256  | ref | YP_603354.1     | peroxiredoxin                                                             | <i>Streptococcus pyogenes</i> MGAS10750                                        |  | group 2 | CFYPADFSVCPTEVSTVHKAWHDDSDVLDGDLAQRGADGIG    |
| 463 | 0        | 65307457  | ref | NP_0011016478.2 | Peroxiredoxin 3                                                           | <i>Danio rerio</i>                                                             |  | group 1 | VSVFFYPLDFTVCPTEVTHLAWTNTIPRSGGI GVLPLGIALRG |
| 464 | 0        | 62204368  | gb  | AAH92846.1      | Peroxiredoxin 3                                                           | <i>Danio rerio</i>                                                             |  | group 1 | VLVVFYPLDFTVCPTEVSTVSHYKWRNTPVDVGGDSIALRA    |
| 465 | 0        | 58534270  | ref | YP_00374018.1   | antioxidant, AhpC/Tsa family, antioxidant, AhpC/Tsa family,               | <i>Wolbachia endosymbiont of Drosophila ananassae</i>                          |  | group 1 | FFYPLDFTVCPTEVSTVHLAWINTPREGGLGVLKEGIAYVRG   |
| 466 | 0        | 12846252  | dbi | BAB27093.1      | unnamed protein product                                                   | <i>Mus musculus</i>                                                            |  | group 1 | FFYPLDFTVCPTEVSTVHLAWINTPREGGLGVLKEGIAYVRG   |
| 467 | 0        | 33591156  | gb  | AAQ23082.1      | thioredoxin peroxidase                                                    | <i>Ixodes ricinus</i>                                                          |  | group 1 | VSTFFYPLDFVCPTEVLAHLAWINTKLGSGVGEISLRG       |
| 468 | 0        | 115844435 | ref | XP_786503.2     | PREDICTED: similar to thioredoxin peroxidase                              | <i>Strongyloides purpuratus</i>                                                |  | group 1 | VDVLKFAKRSDFEYPLDFTFVCPSEEGGIGVLVAGIALRG     |
| 469 | 0        | 15958268  | ref | XP_001176440.1  | PREDICTED: similar to thioredoxin peroxidase                              | <i>Strongyloides purpuratus</i>                                                |  | group 1 | FFYPLDFTVCPTEVSTVHLAWIQTPREGGGVNLNDGADRGR    |
| 470 | 0        | 5762303   | gb  | AADE1093.1      | AF128226_1 thioredoxin peroxidase homolog                                 | <i>Giardia intestinalis</i>                                                    |  | group 1 | ISSFFYPLDFTVCPTEVSLGSLAWVWQTPDRSGGLGGIALRG   |
| 471 | 0        | 7879328   | ref | YP_397440.1     | thioredoxin peroxidase                                                    | <i>Prochlorococcus marinus</i> str. MIT 9312                                   |  | group 1 | VDVLKFAKRSDFEYPLDFTFVCPSEEGGIGVLVAGIALRG     |
| 472 | 9.69E-21 | 116075930 | ref | YP_588430.1     | thioredoxin peroxidase [px1]                                              | <i>Prochlorococcus marinus</i> str. MIT 9312                                   |  | group 1 | FFYPLDFTVCPTEVSTVHLAWIQTPREGGGVNLNDGADRGR    |
| 473 | 0        | 46580652  | ref | YP_966442.1     | alkyl hydroperoxide reductase/Thiol specific antioxidant, AhpC/Tsa family | <i>Desulfovibrio vulgaris</i> subsp. <i>vulgaris</i> str. <i>Hildenborough</i> |  | group 1 | ISSFFYPLDFTVCPTEVSLGSLAWVWQTPDRSGGLGGIALRG   |
| 474 | 0        | 162146596 | ref | YP_001601055.1  | putative alkyl hydroperoxide reductase subunit C                          | <i>Desulfovibrio vulgaris</i> subsp. <i>vulgaris</i> str. <i>Hildenborough</i> |  | group 2 | VDVLKFAKRSDFEYPLDFTFVCPSEEGGIGVLVAGIALRG     |
| 475 | 0        | 227765336 | dbi | CACP54717.1     | putative alkyl hydroperoxide reductase subunit C                          | <i>Desulfovibrio vulgaris</i> subsp. <i>vulgaris</i> str. <i>Hildenborough</i> |  | group 1 | FFYPLDFTVCPTEVSTVHLAWIQTPREGGGVNLNDGADRGR    |
| 476 | 7.02E-14 | 145698439 | dbi | BAE57014.1      | peroxiredoxin                                                             | <i>Enhanoeba nutalli</i>                                                       |  | group 1 | FFYPLDFTVCPTEVSTVHLAWIQTPREGGGVNLNDGADRGR    |
| 477 | 0        | 78223919  | ref | YP_385666.1     | alkyl hydroperoxide reductase/Thiol specific antioxidant                  | <i>Geobacter metallireducens</i> GS-15                                         |  | group 2 | VDVLKFAKRSDFEYPLDFTFVCPSEEGGIGVLVAGIALRG     |
| 478 | 0        | 70730759  | ref | YP_260500.1     | alkyl hydroperoxide reductase, subunit C                                  | <i>Geobacter metallireducens</i> GS-15                                         |  | group 2 | VDVLKFAKRSDFEYPLDFTFVCPSEEGGIGVLVAGIALRG     |
| 479 | 0        | 116187080 | ref | YP_01476970.1   | hypothetical protein VEX2w_02000446                                       | <i>Vibrio</i> sp. Ex25                                                         |  | group 2 | VDVLKFAKRSDFEYPLDFTFVCPSEEGGIGVLVAGIALRG     |
| 480 | 2.80E-14 | 22537972  | ref | NP_688823.1     | alkyl hydroperoxide reductase, subunit C                                  | <i>Streptococcus agalactiae</i> 2603/R                                         |  | group 2 | VDVLKFAKRSDFEYPLDFTFVCPSEEGGIGVLVAGIALRG     |
| 481 | 0        | 87122593  | ref | YP_01078471.1   | alkyl hydroperoxide reductase, subunit C                                  | <i>Streptococcus agalactiae</i> 18RS21                                         |  | group 2 | VDVLKFAKRSDFEYPLDFTFVCPSEEGGIGVLVAGIALRG     |
| 482 | 1.29E-17 | 149180982 | ref | YP_01859483.1   | alkyl hydroperoxide reductase C22 protein                                 | <i>Marrimononas</i> sp. MED121                                                 |  | group 2 | VDVLKFAKRSDFEYPLDFTFVCPSEEGGIGVLVAGIALRG     |
| 483 | 3.52E-15 | 148322428 | gb  | EDK67678.1      | AhpC                                                                      | <i>Bacillus</i> sp. SG-1                                                       |  | group 2 | VDVLKFAKRSDFEYPLDFTFVCPSEEGGIGVLVAGIALRG     |
| 484 | 0        | 123993847 | gb  | ABM84525.1      | peroxiredoxin 4                                                           | <i>synthetic construct</i>                                                     |  | group 1 | VDVLKFAKRSDFEYPLDFTFVCPSEEGGIGVLVAGIALRG     |
| 485 | 0        | 147789752 | emb | CAN67408.1      | hypothetical protein                                                      | <i>Vitis vinifera</i>                                                          |  | group 1 | VDVLKFAKRSDFEYPLDFTFVCPSEEGGIGVLVAGIALRG     |
| 486 | 0        | 94500891  | ref | YP_01307417.1   | alkyl hydroperoxide reductase c22 protein                                 | <i>Oceanobacter</i> sp. RED65                                                  |  | group 2 | VDVLKFAKRSDFEYPLDFTFVCPSEEGGIGVLVAGIALRG     |
| 487 | 0        | 144898700 | emb | EAM11992.1      | alkyl hydroperoxide reductase c22 protein                                 | <i>Oceanobacter</i> sp. RED65                                                  |  | group 2 | VDVLKFAKRSDFEYPLDFTFVCPSEEGGIGVLVAGIALRG     |
| 488 | 0        | 118746767 | ref | YP_01594666.1   | alkyl hydroperoxide reductase/Thiol specific antioxidant                  | <i>Geobacter lovleyi</i> SZ                                                    |  | group 1 | VDVLKFAKRSDFEYPLDFTFVCPSEEGGIGVLVAGIALRG     |
| 489 | 0        | 118680310 | gb  | EAIV86789.1     | alkyl hydroperoxide reductase/Thiol specific antioxidant                  | <i>Geobacter lovleyi</i> SZ                                                    |  | group 1 | VDVLKFAKRSDFEYPLDFTFVCPSEEGGIGVLVAGIALRG     |

|     |          |            |     |                |                                                                    |                                                   |         |                                               |
|-----|----------|------------|-----|----------------|--------------------------------------------------------------------|---------------------------------------------------|---------|-----------------------------------------------|
| 489 | 0        | 126173967  | ref | YP_001050116.1 | alkyl hydroperoxide reductase/ Thiol specific antioxidant          | Shewanella baltica OS155                          | group 1 | VLVFFYPLDFTFVCPSEVSIHNAWRNTPVKGGIGAGVAFRRG    |
|     |          | 153000259  | ref | YP_001365940.1 | alkyl hydroperoxide reductase/ Thiol specific antioxidant          | Shewanella baltica OS185                          |         |                                               |
|     |          | 60874892   | ref | YP_001554208.1 | alkyl hydroperoxide reductase/ Thiol specific antioxidant          | Shewanella baltica OS195                          |         |                                               |
|     |          | 125997172  | gb  | ABN61247.1     | alkyl hydroperoxide reductase/ Thiol specific antioxidant          | Shewanella baltica OS185                          |         |                                               |
|     |          | 151364877  | gb  | ABS07877.1     | alkyl hydroperoxide reductase/ Thiol specific antioxidant          | Shewanella baltica OS185                          |         |                                               |
|     |          | 160860414  | gb  | ABX48948.1     | alkyl hydroperoxide reductase/ Thiol specific antioxidant          | Shewanella baltica OS185                          |         |                                               |
| 490 | 0        | 121532845  | ref | ZP_01664688.1  | putative alkyl hydroperoxide reductase (subunit c) oxidoreductase  | Ralstonia pickettii 121                           | group 3 | FFYPKDFVCPTEVLGKLAWRREHKAGVALRAVSNRAVIG       |
|     |          | 121300790  | gb  | EAx41768.1     | putative peroxiredoxin ynf42                                       | Ralstonia pickettii 121                           |         |                                               |
| 491 | 3.39E-12 | 118411118  | ref | YP_874512.1    | putative peroxiredoxin ynf42                                       | Thalassiosira pseudonana                          | outlier | FFYPANFTVSPTEVSIHLSQSLLSIREGGLAVTEGLGIPG      |
|     |          | 116739865  | gb  | ABK20735.1     | putative peroxiredoxin ynf42                                       | Thalassiosira pseudonana                          |         |                                               |
| 492 | 0        | 150006768  | ref | YP_001301511.1 | thioredoxin peroxidase                                             | Parabacteroides distasonis ATCC 8503              | group 4 | FFYPMDFTFCVPTCEVSVHFRAWL NQDKKGGIHLVLANPVAVRG |
|     |          | 149835192  | gb  | ABR41889.1     | thioredoxin peroxidase                                             | Parabacteroides distasonis ATCC 8503              |         |                                               |
| 493 | 0        | 61619736   | gb  | AAx47423.1     | mitochondrial tripeptide peroxidase                                | Leishmania amazonensis                            | group 1 | FFYPMDFTFCVPTCEVSVSHLAWNTPRKGGLGLVLAASGIALRG  |
| 494 | 0        | 57903631   | gb  | AAW68116.1     | peroxiredoxin                                                      | Leishmania amazonensis                            | group 1 | FFYPDLFTFCVPTCEVSHLAWTQQDRAGGLGVSTSHLTPAVDK   |
| 495 | 0        | 114690163  | ref | XP_521289.2    | peroxiredoxin                                                      | Pan troglodytes                                   | group 1 | FFYPDLFTFCVPTCEVSHLAWNTPRNGGLGVLLSGLAIRG      |
|     |          | 114690185  | ref | XP_001142221.1 | PREDICTED: similar to Aop1 Human, MERS/Aop1                        | Pan troglodytes                                   |         |                                               |
|     |          | 6320661    | ref | NP_010747.1    | Stress inducible cytoplasmic thioredoxin peroxidase                | Saccharomyces cerevisiae                          | group 1 | AFVPLAFSFCVPTESLAWNTLPRDGGGLGVLEIGIALRGLSV    |
| 496 | 2.34E-15 | 2499475    | sp  | Q04120         | Ynf453cp; CAI: 0.27                                                | Saccharomyces cerevisiae                          | group 1 |                                               |
|     |          | 927720     | gb  | AA864886.1     | cTPXII                                                             | Saccharomyces cerevisiae YJM789                   |         |                                               |
|     |          | 151942418  | gb  | EDN60774.1     | putative alkyl hydroperoxide reductase subunit                     | Plesiocystis pacifica SIR-1                       | group 1 | VLAFFYPLDFTFCVPSSEVSVTHAAWRNTPSLDGGIGDGVVALRA |
| 497 | 0        | 149916927  | ref | ZP_01907413.1  | putative alkyl hydroperoxide reductase subunit                     | Plesiocystis pacifica SIR-1                       | group 1 |                                               |
|     |          | 149820301  | gb  | EDM79718.1     | putative alkyl hydroperoxide reductase subunit                     | Plesiocystis pacifica SIR-1                       |         |                                               |
| 498 | 0        | 123966166  | ref | YP_001011247.1 | thioredoxin peroxidase                                             | Prochlorococcus marinus str. MIT 9515             | group 1 | FFYPDLFTFCVPTCEVSVCHLAWIQTPREGGIGVILNDGEADRGG |
|     |          | 123200532  | gb  | ABM72140.1     | thioredoxin peroxidase                                             | Prochlorococcus marinus str. MIT 9515             |         |                                               |
| 499 | 0        | 90994464   | ref | YP_536994.1    | hypothetical protein 199                                           | Porphyra yezoensis                                | group 1 | FFYPDLFTFCVPTCEVLDVSDSSHLAWLQIDRSGGGLDGVVALRG |
|     |          | 122226821  | sp  | Q1XDL4         | Ynf42; PORTE Putative peroxiredoxin ynf42 (Thioredoxin peroxidase) | Porphyra yezoensis                                |         |                                               |
|     |          | 90819028   | tbl | BAE92397.1     | unnamed protein product                                            | Porphyra yezoensis                                |         |                                               |
|     |          | 7416016    | tbl | BAE93646.1     | peroxiredoxin                                                      | Entamoeba dispar                                  | group 1 | LFYPLDWTFCVPTTEQLKVSVCVHQAWCEADKGGVGTGYSRRRG  |
| 500 | 4.40E-14 | 152968927  | ref | YP_001334036.1 | putative thiol-alkyl hydroperoxide reductase                       | Klebsiella pneumoniae subsp. pneumoniae MGH 78578 | group 1 | VLVFFWPMDFTCVPSSEVSVHNAWRNTPVQGGIGEGVALRGYSS  |
| 501 | 0        | 150953776  | gb  | ABR75806.1     | putative thiol-alkyl hydroperoxide reductase                       | Klebsiella pneumoniae subsp. pneumoniae MGH 78578 | group 1 |                                               |
| 502 | 0        | 58039776   | ref | YP_191740.1    | Alkyl hydroperoxide reductase subunit C                            | Glucobacter oxydans 621H                          | group 2 | FFYPADFTFCVPTCEVSTTHKAWHDTPVLVLAIDRAGAGGVG    |
|     |          | 58002190   | gb  | AAW61084.1     | Alkyl hydroperoxide reductase subunit C                            | Glucobacter oxydans 621H                          |         |                                               |
| 503 | 0        | 158422675  | ref | YP_001523967.1 | alkyl hydroperoxide reductase                                      | Azorhizobium caulinodans ORS 571                  | group 3 | MLGIGSFVFPKDFTCVPTCEVTKLAWRRDHKGGVAVRYVLK     |
|     |          | 158329564  | tbl | BAE87049.1     | alkyl hydroperoxide reductase                                      | Azorhizobium caulinodans ORS 571                  |         |                                               |
| 504 | 0        | 149889640  | ref | XP_001493666.1 | PREDICTED: similar to antioxidant protein isoform 1                | Equus caballus                                    | group 1 | FFYPDLFTFCVPTCEVSVHAWNTPRNGGLGVLLAGLALRG      |
| 505 | 0        | 2352262    | gb  | AA868796.1     | peroxiredoxin-1                                                    | Drofilaria immitis                                | group 1 | FFYPDLFTFCVPTCEVSHLAWNTPRNGGLGVLLAGLALRG      |
| 506 | 4.30E-16 | 50843436   | ref | YP_056663.1    | alkyl hydroperoxide reductase C22 protein                          | Propionibacterium acnes KPA171202                 | group 2 | FFYPGDFTCVPTCEVSTVHKAWHADSDVKGAGDAPRAAEGIG    |
|     |          | 50841038   | gb  | AAE83705.1     | alkyl hydroperoxide reductase C22 protein                          | Propionibacterium acnes KPA171202                 |         |                                               |
| 507 | 4.19E-14 | 67464646   | ref | XP_648522.1    | peroxiredoxin                                                      | Entamoeba histolytica HM-1:IMSS                   | group 1 | RIKAFKFINLFYPLDWTFCVPTTEQLKVSVKGGVAGIARRG     |
|     |          | 540092     | sp  | P19476         | CR29 ENT1H Putative peroxiredoxin (Thioredoxin peroxidase)         | Entamoeba histolytica                             |         |                                               |
|     |          | 399674     | emb | CAA50324.1     | alkyl hydroperoxide reductase                                      | Entamoeba histolytica                             |         |                                               |
| 508 | 3.66E-18 | 91090021   | ref | XP_967356.1    | PREDICTED: similar to CG5826-PA                                    | Triptolium castaneum                              | group 1 | VFYPLDFTFCVPTCEVSHLAWNTPRNGGLGVLLAGLALRG      |
| 509 | 0        | 47837782   | ref | NP_001085178.1 | hypothetical protein LOC432282                                     | Xenopus laevis                                    | group 1 | VMPISFFYPLDFTFCVPTTECHLAWINPREGGLGEGVSFRFG    |
|     |          | 47837782   | ref | AAH72351.1     | MGC83501 protein                                                   | Xenopus laevis                                    |         |                                               |
| 510 | 2.73E-22 | 62026740   | gb  | AAH92102.1     | MGC83501 protein                                                   | Xenopus laevis                                    | group 1 | VSTVYPLDFTFCVPTTECHLAWNTPRQGGGLVLLGHTLRLG     |
|     |          | 115899653  | ref | XP_784460.2    | PREDICTED: similar to thioredoxin peroxidase                       | Strongylocentrotus purpuratus                     |         |                                               |
|     |          | 1158972635 | ref | XP_001177358.1 | PREDICTED: similar to thioredoxin peroxidase                       | Strongylocentrotus purpuratus                     |         |                                               |
| 511 | 5.48E-12 | 54650156   | tbl | BAE66880.1     | peroxiredoxin                                                      | Entamoeba mooshkovskii                            | group 1 | VSTLYPLDWSVCPTEVLCGHOAWCETEKNGGVGAGISRRRG     |
| 512 | 0        | 42523944   | ref | NP_969324.1    | alkyl hydroperoxide reductase, C22 subunit                         | Bdellovibrio bacteriovorus HD100                  | group 2 | FFYPADFTFCVPTCEVSTTHKAWHADSEEGLAYRGLVADNIG    |
|     |          | 39576151   | emb | CAE80317.1     | alkyl hydroperoxide reductase C22                                  | Bdellovibrio bacteriovorus HD100                  |         |                                               |
| 513 | 0        | 34850275   | emb | CAE47413.1     | alkyl hydroperoxide reductase C22                                  | Helicobacter pylori                               | group 1 | FFWPKDFTCVPTCEVSVHAWNTPKVGIGEGEALRGNMK        |
| 514 | 0        | 160940362  | ref | ZP_02087707.1  | hypothetical protein CLOBOL_05252                                  | Clostridium bolleae ATCC BAA-613                  | group 2 | NRTIGFYPADFTFCVPTCEVSYVHKAWADADSVLDAGQAFRRG   |
|     |          | 158436942  | gb  | EDP14709.1     | hypothetical protein CLOBOL_05282                                  | Clostridium bolleae ATCC BAA-613                  |         |                                               |
| 515 | 0        | 73998671   | ref | XP_5350331.2   | PREDICTED: similar to Thioredoxin-dependent peroxidase             | Canis familiaris                                  | group 1 | FFYPDLFTFCVPTCEVSHLAWNTPRNGGLGVLLPGIALRG      |
| 516 | 5.38E-14 | 165903197  | gb  | EDR28835.1     | Thioredoxin protein, conserved                                     | Entamoeba dispar SAW760                           | group 1 | LFYPLDWTFCVPTTEQLKVSVCVHQAWCEADKGGVGTGYSRRRG  |
| 517 | 0        | 7963723    | gb  | AAE71324.1     | AF250193_1 natural killer cell enhancement factor                  | Oncorhynchus mykiss                               | group 1 | FFYPDLFTFCVPTTECHLAWNTPRNGGLGISTVLEKGIAYVRG   |
|     |          | 7963725    | gb  | AAE71325.1     | AF250194_1 natural killer cell enhancement factor                  | Oncorhynchus mykiss                               |         |                                               |
|     |          | 7963728    | gb  | AAE71326.1     | AF250195_1 natural killer cell enhancement factor                  | Oncorhynchus mykiss                               |         |                                               |
|     |          | 7963730    | gb  | AAE71327.1     | AF250196_1 natural killer cell enhancement factor                  | Oncorhynchus mykiss                               |         |                                               |
| 518 | 7.85E-14 | 15923371   | ref | NP_370905.1    | alkyl hydroperoxide reductase subunit C                            | Staphylococcus aureus subsp. aureus Mu50          | group 2 | CFYPADFVFCVPTCEVSTVHKAWHDHSDVLDITGLAQRGADGIG  |
|     |          | 15926092   | ref | NP_373615.1    | alkyl hydroperoxide reductase subunit C                            | Staphylococcus aureus subsp. aureus N315          |         |                                               |
|     |          | 12182086   | ref | NP_645174.1    | alkyl hydroperoxide reductase subunit C                            | Staphylococcus aureus subsp. aureus MW2           |         |                                               |
|     |          | 49482631   | ref | YP_039865.1    | alkyl hydroperoxide reductase subunit C                            | Staphylococcus aureus subsp. aureus MRSAA252      |         |                                               |
|     |          | 49482626   | ref | YP_042482.1    | alkyl hydroperoxide reductase subunit C                            | Staphylococcus aureus subsp. aureus MSSA476       |         |                                               |
|     |          | 57652639   | ref | YP_185342.1    | alkyl hydroperoxide reductase, C subunit                           | Staphylococcus aureus subsp. aureus COL           |         |                                               |
|     |          | 82750092   | ref | YP_415833.1    | alkyl hydroperoxide reductase subunit C                            | Staphylococcus aureus subsp. aureus RF122         |         |                                               |
|     |          | 87162200   | ref | YP_493094.1    | Alkyl hydroperoxide reductase subunit C                            | Staphylococcus aureus subsp. aureus USA300        |         |                                               |
|     |          | 88194163   | ref | YP_498954.1    | alkyl hydroperoxide reductase                                      | Staphylococcus aureus subsp. aureus NGTC 8325     |         |                                               |
|     |          | 148268667  | ref | YP_001245610.1 | Peroxiredoxin                                                      | Staphylococcus aureus subsp. aureus JH9           |         |                                               |
|     |          | 150392913  | ref | YP_001315588.1 | Peroxiredoxin                                                      | Staphylococcus aureus subsp. aureus JH1           |         |                                               |

|            |     |                |                                                                                       |                                                    |  |                                                     |
|------------|-----|----------------|---------------------------------------------------------------------------------------|----------------------------------------------------|--|-----------------------------------------------------|
| 151220584  | ref | YP_001331406.1 | alkyl hydroperoxidase reductase subunit C                                             | Staphylococcus aureus subsp. aureus str. Newman    |  |                                                     |
| 156978709  | ref | YP_001440966.1 | alkyl hydroperoxidase reductase subunit C                                             | Staphylococcus aureus subsp. aureus Mu3            |  |                                                     |
| 161506653  | ref | YP_001157432.1 | peroxidase subunit C                                                                  | Staphylococcus aureus subsp. aureus USA300_TCH1516 |  |                                                     |
| 60386613   | sp  | Q6G091         | Ahpc-STAAS Alkyl hydroperoxide reductase subunit                                      | Staphylococcus aureus subsp. aureus MSSA476        |  |                                                     |
| 60389638   | sp  | Q6GJ07         | Ahpc-STAAR Alkyl hydroperoxide reductase subunit                                      | Staphylococcus aureus subsp. aureus MRSA252        |  |                                                     |
| 60391217   | sp  | P0A0B5         | Ahpc-STAAM Alkyl hydroperoxide reductase subunit                                      | Staphylococcus aureus subsp. aureus MRSA252        |  |                                                     |
| 60391218   | sp  | P0A0B6         | Ahpc-STAAM Alkyl hydroperoxide reductase subunit                                      | Staphylococcus aureus subsp. aureus Mu50           |  |                                                     |
| 60391219   | sp  | P0A0B7         | Ahpc-STAAB Alkyl hydroperoxide reductase subunit                                      | Staphylococcus aureus subsp. aureus MW2            |  |                                                     |
| 60391228   | sp  | P99074         | Ahpc-STAAN Alkyl hydroperoxide reductase subunit                                      | Staphylococcus aureus subsp. aureus NCTC 8325      |  |                                                     |
| 181659656  | sp  | Q3HIR5         | Ahpc-STAAC Alkyl hydroperoxide reductase subunit                                      | Staphylococcus aureus subsp. aureus COL            |  |                                                     |
| 123722415  | sp  | Q2FJN4         | Ahpc-STAAS Alkyl hydroperoxide reductase subunit                                      | Staphylococcus aureus subsp. aureus COL            |  |                                                     |
| 123768535  | sp  | Q2YVK2         | Ahpc-STAAB Alkyl hydroperoxide reductase subunit                                      | Staphylococcus aureus subsp. aureus USA300         |  |                                                     |
| 1916316    | db  | AA851151.1     | alkyl hydroperoxidase reductase subunit C                                             | Staphylococcus aureus                              |  |                                                     |
| 13702026   | dbj | BAB41593.1     | alkyl hydroperoxidase reductase subunit C                                             | Staphylococcus aureus subsp. aureus N316           |  |                                                     |
| 14246149   | dbj | BAB58943.1     | alkyl hydroperoxidase reductase subunit C                                             | Staphylococcus aureus subsp. aureus Mu50           |  |                                                     |
| 21203522   | dbj | BAB94222.1     | alkyl hydroperoxidase reductase subunit C                                             | Staphylococcus aureus subsp. aureus MW2            |  |                                                     |
| 49240760   | emb | CAG39422.1     | alkyl hydroperoxidase reductase subunit C                                             | Staphylococcus aureus subsp. aureus MRSA252        |  |                                                     |
| 49243704   | emb | CAG42129.1     | alkyl hydroperoxidase reductase subunit C                                             | Staphylococcus aureus subsp. aureus MSSA476        |  |                                                     |
| 57286825   | gb  | AAW38919.1     | alkyl hydroperoxidase reductase, C subunit                                            | Staphylococcus aureus subsp. aureus COL            |  |                                                     |
| 82656623   | emb | CAI80019.1     | alkyl hydroperoxidase reductase subunit C                                             | Staphylococcus aureus RF122                        |  |                                                     |
| 87128174   | gb  | ABD22868.1     | alkyl hydroperoxidase reductase subunit C                                             | Staphylococcus aureus subsp. aureus USA300_FPR3757 |  |                                                     |
| 87201721   | gb  | ABD29531.1     | alkyl hydroperoxidase reductase subunit C                                             | Staphylococcus aureus subsp. aureus NCTC 8325      |  |                                                     |
| 147739936  | gb  | ABQ48234.1     | Peroxiredoxin                                                                         | Staphylococcus aureus subsp. aureus JH9            |  |                                                     |
| 149946366  | gb  | ABR51301.1     | Peroxiredoxin                                                                         | Staphylococcus aureus subsp. aureus JH1            |  |                                                     |
| 150373384  | dbj | BAF66844.1     | alkyl hydroperoxidase reductase subunit C                                             | Staphylococcus aureus subsp. aureus str. Newman    |  |                                                     |
| 156720844  | dbj | BAF77261.1     | alkyl hydroperoxidase reductase subunit C                                             | Staphylococcus aureus subsp. aureus Mu3            |  |                                                     |
| 160367462  | gb  | ABX28433.1     | peroxidase subunit C                                                                  | Staphylococcus aureus subsp. aureus USA300_TCH1516 |  |                                                     |
| 165901235  | gb  | EDR27346.1     | hypothetical protein, conserved                                                       | Entamoeba dispar SAM760                            |  |                                                     |
| 90075488   | dbj | BAE87424.1     | unnamed protein product                                                               | Macaca fascicularis                                |  | LFYPLDWTFCVPTTEQLKVSVCHQAWCEADKGGVGTGYSRRG          |
| 32475263   | ref | NP_868257.1    | peroxidase 2                                                                          | Rhodopirellula ballica SH 1                        |  | FFYPLDFTFCVPTTEVDSCHLAWINTPKGGGLGVLKEGISFRG         |
| 32445804   | emb | CAD78535.1     | peroxidase 2                                                                          | Rhodopirellula ballica SH 1                        |  | VLVFFWPLDFTFCVPTTEVSTHILAWINTPREGGIGGGVALRG         |
| 124606949  | ref | XP_001350554.1 | thioredoxin peroxidase                                                                | Plasmodium falciparum 3D7                          |  | VTKLFYPLNYTFVCPTEISVSHLAWKNMIPKGGIGNSFALRG          |
| 13357166   | gb  | AAK20024.1     | AF25978_1 thioredoxin peroxidase 2                                                    | Plasmodium falciparum                              |  |                                                     |
| 23498667   | gb  | AAK36234.1     | AEO14846_33 thioredoxin peroxidase                                                    | Plasmodium falciparum 3D7                          |  |                                                     |
| 29654768   | ref | NP_820460.1    | antioxidant, AhpC/TSA family                                                          | Coxiella burnetii RSA 493                          |  | SLKAVISNDVFFWPKDFTFVCPTEGFEAVLGVDSGVAERA            |
| 153210454  | ref | YP_019476296.1 | alkyl hydroperoxidase reductase AhpC                                                  | Coxiella burnetii MSU Goat O1771                   |  |                                                     |
| 154708501  | ref | YP_001422935.1 | alkyl hydroperoxidase reductase AhpC                                                  | Coxiella burnetii Dugway 5J108-111                 |  |                                                     |
| 161830432  | ref | YP_001597319.1 | alkyl hydroperoxidase reductase AhpC                                                  | Coxiella burnetii RSA 331                          |  |                                                     |
| 165924160  | ref | YP_02219992.1  | alkyl hydroperoxidase reductase AhpC                                                  | Coxiella burnetii RSA 334                          |  |                                                     |
| 29542036   | gb  | AAO90974.1     | antioxidant, AhpC/TSA family                                                          | Coxiella burnetii RSA 493                          |  |                                                     |
| 120875127  | gb  | EA331751.1     | alkyl hydroperoxidase reductase AhpC                                                  | Coxiella burnetii MSU Goat O1771                   |  |                                                     |
| 154355787  | gb  | ABS7249.1      | alkyl hydroperoxidase reductase AhpC                                                  | Coxiella burnetii Dugway 5J108-111                 |  |                                                     |
| 161762299  | gb  | ABX79941.1     | alkyl hydroperoxidase reductase AhpC                                                  | Coxiella burnetii RSA 331                          |  |                                                     |
| 165916399  | gb  | EDR35003.1     | alkyl hydroperoxidase reductase AhpC                                                  | Coxiella burnetii RSA 334                          |  |                                                     |
| 163762964  | ref | YP_02170028.1  | Peroxiredoxin                                                                         | Bacillus selenitireducens MLS10                    |  | FFYPLDFTFCVPTTEVSTSHRWVTEMDRQKGGVGLDGLALRG          |
| 160356897  | gb  | EDP83546.1     | Peroxiredoxin                                                                         | Bacillus selenitireducens MLS10                    |  | FFYPLDFTFCVPTTECVSAVHTWRNTPRKGIGVLTGVVALRG          |
| 156986072  | ref | XP_001161001.9 | thioredoxin peroxidase-like protein                                                   | Babesia bovis T2Bo                                 |  |                                                     |
| 19479721   | gb  | EDO06451.1     | thioredoxin peroxidase-like protein                                                   | Babesia bovis                                      |  |                                                     |
| 71066352   | ref | YP_265079.1    | putative alkyl hydroperoxidase reductase, subunit C                                   | Psychrobacter arcticus 273-4                       |  | LFYPADFTFCVPTTEVSTTHKAWHDSSEVMIAGLAERAGGGIG         |
| 71039337   | gb  | AAZ19645.1     | putative alkyl hydroperoxidase reductase, subunit C                                   | Psychrobacter arcticus 273-4                       |  |                                                     |
| 27366935   | ref | NP_762462.1    | Peroxiredoxin                                                                         | Vibrio vulnificus CMCP6                            |  | NTTIKVLGFFYPADFTFCVPTTEVSTTHKAWHDSSEVMIAGLAERAGGGIG |
| 27358502   | db  | AAO07452.1     | AEO16809_214 Peroxiredoxin                                                            | Vibrio vulnificus CMCP6                            |  |                                                     |
| 87308751   | ref | YP_01090890.1  | peroxidase 2                                                                          | Blastopirellula marina DSM 3645                    |  | VLVFFYPLDFTFCVPTTECVSISHLAWRNTPRDGGIGGGIALLRG       |
| 87288462   | gb  | EAQ80357.1     | peroxidase 2                                                                          | Blastopirellula marina DSM 3645                    |  |                                                     |
| 88858687   | ref | YP_011333328.1 | alkyl hydroperoxidase reductase subunit C                                             | Pseudoalteromonas tunicata D2                      |  | FFYPADFTFCVPTTEVSTAHKAWHDSSEVMIAGLAERAGGGIG         |
| 88818913   | gb  | EAR28727.1     | alkyl hydroperoxidase reductase subunit C                                             | Pseudoalteromonas tunicata D2                      |  |                                                     |
| 157366942  | ref | XP_001682026.1 | tryparedoxin peroxidase                                                               | Pseudoalteromonas tunicata D2                      |  | FFYPLDFTFCVPTTEVSTAHKAWHDSSEVMIAGLAERAGGGIG         |
| 157866950  | ref | XP_001682030.1 | tryparedoxin peroxidase                                                               | Leishmania major                                   |  | FFYPLDFTFCVPTTEVSTAHKAWHDSSEVMIAGLAERAGGGIG         |
| 3411094    | gb  | AA331146.1     | thiol specific antioxidant                                                            | Leishmania major                                   |  |                                                     |
| 68125477   | emb | CAJ03338.1     | tryparedoxin peroxidase                                                               | Leishmania major                                   |  |                                                     |
| 68125481   | emb | CAJ03342.1     | tryparedoxin peroxidase                                                               | Leishmania major                                   |  |                                                     |
| 77324178   | ref | YP_341752.1    | alkyl hydroperoxidase reductase subunit C (Alkyl hydroperoxidase reductase subunit C) | Pseudoalteromonas haloplanktis TABCP (6.574E-09)   |  | VLGFFYPADFTFCVPTTEVSTTHKAWHDSSEVMIAGLAERAGGGIG      |
| 76877089   | emb | CAI80306.1     | alkyl hydroperoxidase reductase subunit C (Alkyl hydroperoxidase reductase subunit C) | Pseudoalteromonas haloplanktis TABCP (6.574E-09)   |  |                                                     |
| 1522994393 | ref | YP_001339228.1 | alkyl hydroperoxidase reductase/Thiol specific antioxidant                            | Marinomonas sp. MWYL1                              |  | VLGFFYPADFTFCVPTTEVSTTHKAWHDSSEVMIAGLAERAGGGIG      |
| 150635317  | gb  | ABR89293.1     | alkyl hydroperoxidase reductase/Thiol specific antioxidant                            | Marinomonas sp. MWYL1                              |  |                                                     |
| 56541226   | gb  | AAH86783.1     | Prdx2 protein                                                                         | Mus musculus                                       |  | FFYPLDFTFCVPTTEVSTHAWINTPREGLGVLKEGIAYRG            |
| 153011153  | ref | YP_001372367.1 | alkyl hydroperoxidase reductase/Thiol specific antioxidant                            | Ochrobactrum anthropi ATCC 49188                   |  | MLGIVSAFFYPKDFTFVCPTEVLGVKAWRRHDKGVAYRG             |
| 151563041  | db  | ABS16538.1     | alkyl hydroperoxidase reductase/Thiol specific antioxidant                            | Ochrobactrum anthropi ATCC 49188                   |  |                                                     |
| 91788904   | ref | YP_549856.1    | alkyl hydroperoxidase reductase/Thiol specific antioxidant                            | Oloronomas sp. JS666                               |  | VFYPADFTFCVPTTEVSTTHKAWHDSSEVMIAGLAERAGGGIG         |
| 91698129   | gb  | ABE44956.1     | alkyl hydroperoxidase reductase/Thiol specific antioxidant                            | Oloronomas sp. JS666                               |  |                                                     |
| 10767221   | gij | S49173         | hypothetical protein - barley (fragment)                                              | Hordeum vulgare                                    |  | FFYPLDFTFCVPTTEVSHLAWVQTERSGGLGVLIQIALLRG           |

|     |          |                |                |                                                          |                                     |                                    |         |                                                |
|-----|----------|----------------|----------------|----------------------------------------------------------|-------------------------------------|------------------------------------|---------|------------------------------------------------|
| 538 | 6.07E-15 | 1455490333.ref | XP_001460196.1 | hypothetical protein GSPAT10025534001                    | unnamed protein product             | Paramacium tetraurelia strain d4-2 | group 1 | FFYPLDFTVCPTEVSVSHMKYCOIPRQGGGLVLIQVAFRG       |
| 539 |          | 124428026.emb  | CAK922799.1    | unannotated protein product                              | Paramacium tetraurelia              |                                    | group 1 | FFYPLDFTVCPTEVSVSHMKYCOIPRQGGGLVLIQVAFRG       |
| 540 | 0        | 149632365.ref  | XP_001507865.1 | PREDICTED: similar to proliferation associated gene      | Ornithorynchus anatinus             |                                    | group 1 | WVFPKDFTFVCPTEVSVHFAWNTPKQGGGLVLIQVAFRG        |
| 541 | 0        | 582011189.gb   | AAW66718.1     | AhpC                                                     | Helicobacter pylori                 |                                    | group 1 | VLVFFPLDFTVCPSEVSHNAWRNTAVNGGIGAGVAFRG         |
| 542 | 0        | 116214895.ref  | XP_01481059.1  | hypothetical protein VchoR_02003052                      | Vibrio cholerae MO10                |                                    | group 1 | NLKFYPMDFTFVCPSEVSHNAWRNTAVNGGIGAGVAFRG        |
| 543 | 0        | 32029501.ref   | ZP_00132514.1  | COG0450: Peroxiredoxin                                   | Haemophilus somnus 2336             |                                    | group 1 | FFYPADFTVCPTEVSVTHKAWHDADSVLRQGSADRAAEGIG      |
| 544 | 0        | 110768962.ref  | XP_001122282.1 | PREDICTED: similar to Peroxiredoxin-2 (Thioredoxin)      | Apis mellifera                      |                                    | group 2 | FFYPADFTVCPTEVSVTHKAWHDADSVLRQGSADRAAEGIG      |
| 545 | 0        | 157775299.ref  | XP_001665715.1 | hypothetical protein CBG18073                            | Caenorhabditis briggsae AF16        |                                    | group 1 | FFYPLDFTVCPTEVSVHFAWNTPKQGGGLVLIQVAFRG         |
| 546 | 1.89E-18 | 3759181.dbl    | BAE43306.1     | Hypothetical protein CBG18073                            | Caenorhabditis briggsae             |                                    | group 1 | FFYPLDFTVCPTEVSVHFAWNTPKQGGGLVLIQVAFRG         |
| 547 | 0        | 29150183.emb   | CAD76635.1     | alkyl hydroperoxide reductase C                          | Amphibacillus xylanus               |                                    | group 2 | VFPADSEVCPTEVSVHFAWNTPKQGGGLVLIQVAFRG          |
| 548 | 0        | 157136394.ref  | XP_001663718.1 | peroxiredoxins; prx-1; prx-2; prx-3                      | Helicobacter pylori                 |                                    | group 1 | FFYPLDFTVCPTEVSVHFAWNTPKQGGGLVLIQVAFRG         |
| 549 | 7.82E-17 | 108869991.gb   | EAT34216.1     | peroxiredoxins; prx-1; prx-2; prx-3                      | Aedes aegypti                       |                                    | group 2 | KGDILLVFPADFTVCPTEVSVTHKAWHDADSVLRQGSADRAAEGIG |
| 550 | 0        | 149635578.ref  | XP_00150098.1  | hypothetical protein DSY0524                             | Desulfitobacterium hafniense Y51    |                                    | group 1 | FFYPLDFTVCPTEVSVHFAWNTPKQGGGLVLIQVAFRG         |
| 551 | 0        | 149267687.ref  | XP_922530.2    | PREDICTED: similar to peroxiredoxin 2                    | Desulfitobacterium hafniense DCB-2  |                                    | group 1 | FFYPLDFTVCPTEVSVHFAWNTPKQGGGLVLIQVAFRG         |
| 552 | 1.36E-15 | 141082.sp      | P28830         | YNDH_BACYN Putative peroxiredoxin in ndh 5 region        | Mus musculus                        |                                    | group 2 | VSECFYPADFTVCPTEVSVHFAWNTPKQGGGLVLIQVAFRG      |
| 553 | 2.27E-12 | 121608079.ref  | YP_998886.1    | alkyl hydroperoxide reductase/Thiol specific antioxidant | Bacillus sp. (strain YN-1)          |                                    | group 2 | RGGKGSVIFMPAAFTFNCPTESHKWHETSPVKGEGALRGR       |
| 554 | 0        | 66821043.ref   | XP_644052.1    | peroxiredoxin                                            | Verminephrobacter eiseniae EF01-2   |                                    | group 1 | FFYPLDFTVCPTEVSVHFAWNTPKQGGGLVLIQVAFRG         |
| 555 | 0        | 28828367.gb    | AAO51015.1     | similar to Rattus norvegicus (Rat). Prx IV               | Dicystostelium discoideum           |                                    | group 2 | NGAFKFFYPADFTVCPTEVSVTHKAWHDADSVLRQGSADRAAEGIG |
| 556 | 4.53E-12 | 149130507.gb   | EDM21713.1     | hypothetical protein BACCAC_00067                        | Bacteroides caecae ATCC 43185       |                                    | group 2 | WVSIFMPAAFTFNCPTESHKWHETSPVKGEGALRGR           |
| 557 | 0        | 107099130.ref  | YP_788296.1    | alkyl hydroperoxide reductase subunit C                  | Pseudomonas aeruginosa C3719        |                                    | group 1 | FFYPLDFTVCPTEVSVHFAWNTPKQGGGLVLIQVAFRG         |
| 558 | 1.62E-16 | 161521039.ref  | YP_001345612.1 | peroxiredoxin                                            | Pseudomonas aeruginosa 2192         |                                    | group 2 | VFPADSEVCPTEVSVHFAWNTPKQGGGLVLIQVAFRG          |
| 559 | 0        | 156710666.gb   | ED051025.1     | alkyl hydroperoxide reductase C22                        | Pseudomonas aeruginosa PACS2        |                                    | group 1 | FFYPLDFTVCPTEVSVHFAWNTPKQGGGLVLIQVAFRG         |
| 560 | 0        | 83745900.ref   | XP_00942957.1  | alkyl hydroperoxide reductase subunit C                  | Pseudomonas aeruginosa UCBPP-PA14   |                                    | group 2 | FFYPADFTVCPTEVSVTHKAWHDADSVLRQGSADRAAEGIG      |
| 561 | 0        | 83727590.gb    | EAP74711.1     | alkyl hydroperoxide reductase C22                        | Pseudomonas aeruginosa PA7          |                                    | group 1 | FFYPADFTVCPTEVSVTHKAWHDADSVLRQGSADRAAEGIG      |
| 562 | 0        | 95931471.ref   | ZP_01341474.1  | alkyl hydroperoxide reductase/Thiol specific antioxidant | Burkholderia multivorans ATCC 17616 |                                    | group 1 | FFYPADFTVCPTEVSVTHKAWHDADSVLRQGSADRAAEGIG      |
| 563 | 8.55E-17 | 502828495.ref  | XP_446677.1    | unannotated protein product                              | Burkholderia multivorans ATCC 17616 |                                    | group 1 | FFYPADFTVCPTEVSVTHKAWHDADSVLRQGSADRAAEGIG      |
| 564 | 0        | 119471587.ref  | ZP_01614001.1  | peroxiredoxin 2                                          | Hydrogenobaculum sp. Y04AA51        |                                    | group 3 | YFYPKDFTFVCPTEVTVHAWARDEKLEIGIKTGLALRQGVGK     |
| 565 | 2.15E-11 | 25089582.sp    | P72314         | AHPC RHORU Alkyl hydroperoxide reductase                 | Raistonia solanacearum UW551        |                                    | group 2 | FFYPADFTVCPTEVSVTHKAWHDADSVLRQGSADRAAEGIG      |
| 566 | 0        | 152992346.dbl  | BAE71710.1     | peroxiredoxin; AhpC/Isa family                           | Raistonia solanacearum UW551        |                                    | group 1 | FFYPADFTVCPTEVSVTHKAWHDADSVLRQGSADRAAEGIG      |
| 567 | 0        | 62896877.dbl   | BAD96379.1     | peroxiredoxin; 3 isoform a precursor variant             | Sulfitobacterium hafniense DCB-2    |                                    | group 1 | FFYPLDFTVCPTEVSVHFAWNTPKQGGGLVLIQVAFRG         |
| 568 | 7.23E-19 | 9955007.pdb    | 1QMV           | A Chain A, Thioredoxin Peroxidase B From Red Blood       | Homo sapiens                        |                                    | group 1 | FFYPLDFTVCPTEVSVHFAWNTPKQGGGLVLIQVAFRG         |

|         |          |                                                    |                |                                                           |                                      |         |                                                |
|---------|----------|----------------------------------------------------|----------------|-----------------------------------------------------------|--------------------------------------|---------|------------------------------------------------|
| 9955008 | 1QMV     | B Chain B, Thiooxidase Peroxidase B From Red Blood | Homosapiens    |                                                           |                                      |         |                                                |
| 9955009 | 1QMV     | C Chain C, Thiooxidase Peroxidase B From Red Blood | Homosapiens    |                                                           |                                      |         |                                                |
| 9955010 | 1QMV     | D Chain D, Thiooxidase Peroxidase B From Red Blood | Homosapiens    |                                                           |                                      |         |                                                |
| 9955011 | 1QMV     | E Chain E, Thiooxidase Peroxidase B From Red Blood | Homosapiens    |                                                           |                                      |         |                                                |
| 9955012 | 1QMV     | F Chain F, Thiooxidase Peroxidase B From Red Blood | Homosapiens    |                                                           |                                      |         |                                                |
| 9955013 | 1QMV     | G Chain G, Thiooxidase Peroxidase B From Red Blood | Homosapiens    |                                                           |                                      |         |                                                |
| 9955014 | 1QMV     | H Chain H, Thiooxidase Peroxidase B From Red Blood | Homosapiens    |                                                           |                                      |         |                                                |
| 9955015 | 1QMV     | I Chain I, Thiooxidase Peroxidase B From Red Blood | Homosapiens    |                                                           |                                      |         |                                                |
| 9955016 | 1QMV     | J Chain J, Thiooxidase Peroxidase B From Red Blood | Homosapiens    |                                                           |                                      |         |                                                |
| 569     | 0        | 85374917 ref                                       | YP_458979.1    | alkyl hydroperoxide reductase (small subunit)             | Erythrocyte filorialis HTCC2594      | group 2 | MGIIGFYPADFTFVCPTEVSTSHKAWHDITSEVLRVGLADRA     |
| 570     | 0        | 84789000 gb                                        | ABC64.182.1    | alkyl hydroperoxide reductase (small subunit)             | Erythrocyte filorialis HTCC2594      | group 1 | VSFYPLDFTFVCPTEVTLGHQAWQVETDRNKGVVGAGISRGG     |
| 571     | 0        | 1482394.64 gb                                      | YP_001224841.1 | Peroxioredoxin, AhpC/TSA family                           | Synechococcus sp. WH 7803            | group 1 | FFYPLDFTFVCPTEVGLVDSHSLAWIQTPROGGI.GEGVALRG    |
| 571     | 5.49E-09 | 147847993 emb                                      | CAN235544.1    | Peroxioredoxin, AhpC/TSA family                           | Synechococcus sp. WH 7803            | outlier | FFYPLDFTFVCPTEVGLVDSHSLAWIQTPROGGI.GEGVALRG    |
| 572     | 1.48E-14 | 149952158 gb                                       | ABR90866.1     | alkyl hydroperoxide reductase/ Thiol specific antioxidant | Alkaliphilus metallireducens QYMF    | group 1 | FFYPLDFTFVCPTEVGLVDSHSLAWIQTPROGGI.GEGVALRG    |
| 572     | 0        | 546650152 gb                                       | BAD66878.1     | peroxiredoxin                                             | Entamoeba muskovskii                 | group 1 | VSTLFYPLDWTFVCPTEVILGCHQAWQVETDRNKGVVGAGISRGG  |
| 573     | 0        | 148708893 gb                                       | EDI4.0843.1    | peroxiredoxin A, isoform GRA_a                            | Mus musculus                         | group 1 | VSTLFYPLDWTFVCPTEVILGCHQAWQVETDRNKGVVGAGISRGG  |
| 574     | 0        | 89072610 ref                                       | YP_01159182.1  | alkyl hydroperoxide reductase c22 protein                 | Photobacterium sp. SKA34             | group 2 | VLGGFYPADFTFVCPTEVTHLAWINTPQROGGI.GSHTLRGVL    |
|         |          | 90581516 ref                                       | YP_01237309.1  | alkyl hydroperoxide reductase c22 protein                 | Vibrio angustum S14                  |         |                                                |
|         |          | 89057174 gb                                        | EAR87167.1     | alkyl hydroperoxide reductase c22 protein                 | Photobacterium sp. SKA34             |         |                                                |
|         |          | 90437278 gb                                        | EAS52476.1     | alkyl hydroperoxide reductase c22 protein                 | Vibrio angustum S14                  |         |                                                |
| 575     | 0        | 29377215 ref                                       | NP_816369.1    | alkyl hydroperoxide reductase, C subunit                  | Enterococcus faecalis V583           | outlier | VSTFFYPADFSFVCPTEVAHLQELNCEVNGQLAVLDSGMAVRA    |
|         |          | 2353764 gb                                         | AAAC46081.1    | alkyl hydrogen peroxide reductase                         | Enterococcus faecalis V583           |         |                                                |
|         |          | 29344681 gb                                        | AAO82439.1     | alkyl hydroperoxide reductase, C subunit                  | Enterococcus faecalis V583           |         |                                                |
| 576     | 2.40E-18 | 150205777 ref                                      | YP_001296603.1 | Probable peroxiredoxin                                    | Flavobacterium psychrophilum J190286 | group 4 | NLKFYWPYKDFTFVCPTECDTVHFVFWVFLNTPKNGGIESVITFRA |
|         |          | 149772318 emb                                      | CAL43796.1     | Probable peroxiredoxin                                    | Flavobacterium psychrophilum J190286 |         |                                                |
| 577     | 4.40E-16 | 73984367 ref                                       | XP_850180.1    | PREDICTED: similar to Thiooxidase-dependent perox         | Canis familiaris                     | group 1 | FFYPLDFTFVCPTEVSVTHLAWNALONSLGLVLLPGLALRG      |
| 578     | 0        | 145357502 ref                                      | XP_001422957.1 | predicted protein                                         | Ostreococcus lucimarinus CGE9901     | group 1 | FFYPLDFTFVCPTEVGLVDSHSLAWIQTPROGGI.GDGITALRG   |
|         |          | 1445853201 gb                                      | ABP01316.1     | predicted protein                                         | Ostreococcus lucimarinus CGE9901     |         |                                                |
| 579     | 6.56E-14 | 217354 dbj                                         | BAA00749.1     | 30,000-Mr antigen                                         | Entamoeba histolytica                | group 1 | RKAKFKELNLYPLDWFVCPTEQLKYSYKGGVYGGVGIARRG      |
| 580     | 0        | 16331338 ref                                       | NP_442086.1    | thiol-specific antioxidant protein                        | Synechococcus sp. PCC 6803           | group 1 | FFYPLDFTFVCPTEVSHLAWIQTPROGGI.GAGIALRGVLR      |
|         |          | 3123075 sp                                         | O56624         | Y755_SYN73 Putative peroxiredoxin sil0755 (Thioredo       | Synechococcus sp.                    | group 2 | VLDFVYPADFTFVCPTEVTHKAWADASDEGLALRGDNGIG       |
|         |          | 1001510 dbj                                        | BAA10136.1     | alkyl-specific antioxidant protein                        | Synechococcus sp. PCC 6803           | group 1 | FFYPLDFTFVCPTEVSVSHLAWNTPKGGGL.GVLKEGISFRG     |
| 581     | 4.01E-16 | 18309764 ref                                       | NP_561638.1    | alkyl hydrogen peroxide reductase                         | Clostridium perfringens str. 13      | group 1 | FFYPLDFTFVCPTEVSVSHLAWVQTFRGGGLGLVLIQIAGLRG    |
|         |          | 18144442 dbj                                       | BAE80498.1     | alkyl hydrogen peroxide reductase                         | Clostridium perfringens str. 13      | group 1 | VLVFFWPLDFTFVCPSEVSTHFAMRNTPVYKGGIEGVVALRA     |
| 582     | 0        | 606554321 gb                                       | AAAZ59851.1    | peroxiredoxin 1                                           | Secale cereale                       | group 1 | VLLFFYLDFTFVCRSEVSVTHNAWRNATVYKGGIAGVAFRA      |
| 583     | 0        | 3328221 gb                                         | AAAC78473.1    | thioredoxin peroxidase                                    | Nitrocyclus mobilis Nb-231           | group 1 | YFYPLDFTFVCPSECVTHLAWKKTPLGGIGESVVALRVL        |
| 584     | 0        | 88811195 ref                                       | YP_01126451.1  | probable alkyl hydroperoxidase reductase                  | Nitrocyclus mobilis Nb-231           | group 1 | 0                                              |
| 585     | 9.72E-19 | 88798850 ref                                       | YP_01114432.1  | probable alkyl hydroperoxidase reductase                  | Reinekea sp. MED297                  | group 1 |                                                |
|         |          | 88798330 gb                                        | EAR09523.1     | Peroxioredoxin                                            | Reinekea sp. MED297                  | group 1 |                                                |
| 586     | 0        | 68075607 ref                                       | XP_679723.1    | 2-Cys peroxiredoxin                                       | Plasmodium berghei strain ANKA       | group 1 |                                                |
|         |          | 56500534 emb                                       | CAN196544.2    | 2-Cys peroxiredoxin, putative                             | Plasmodium berghei                   | group 1 |                                                |
| 587     | 0        | 440308 gb                                          | AAA50465.1     | enhancer protein                                          | Homosapiens                          | group 1 |                                                |
| 588     | 0        | 126273047 ref                                      | XP_001367972.1 | PREDICTED: similar to Ahp1 Human, MERE(Ahp1)              | Monodelphis domestica                | group 1 | VITFFYPLDFTFVCPTEVSVSHLAWINTPSSRGGI.GPGLALRG   |
| 589     | 0        | 153888508 ref                                      | ZP_02009650.1  | alkyl hydroperoxide reductase/ Thiol specific antioxidant | Raistonia pikeitii 12D               | group 3 | FFYPLDFTFVCPTEVGLVDSHSLAWIQTPROGGI.GAGIALRG    |
|         |          | 151576028 gb                                       | EDN39442.1     | alkyl hydroperoxide reductase/ Thiol specific antioxidant | Raistonia pikeitii 12D               |         |                                                |
| 590     | 0        | 78485731 ref                                       | YP_391656.1    | Alkyl hydroperoxide reductase/ Thiol specific antioxidant | Thiomicrospira crunogena XCL-2       | group 1 | NLKFYPLDFTFVCPSEVSVTHNAWRNTPVYKGGIAGVADYL      |
|         |          | 78364017 gb                                        | ABB41982.1     | AhpC/TSA family protein                                   | Thiomicrospira crunogena XCL-2       |         |                                                |
| 591     | 0        | 149744775 ref                                      | XP_001501016.1 | PREDICTED: similar to proliferation associated gene       | Equus caballus                       | group 1 | FFYPLDFTFVCPTECHLAWIKTPKGGI.RVLIKEGISFRGISV    |
| 592     | 2.08E-18 | 62738232 pbb                                       | 1WE0           | A Chain A, Crystall Structure Of Peroxiredoxin (AhpC)     | Amphibacillus xylanus                | group 2 | VFYPADFSFVCPTEVSVTHKAWIHNESVPLNITGLADRGADGIG   |
|         |          | 62738233 pbb                                       | 1WE0           | B Chain B, Crystall Structure Of Peroxiredoxin (AhpC)     | Amphibacillus xylanus                |         |                                                |
|         |          | 62738234 pbb                                       | 1WE0           | C Chain C, Crystall Structure Of Peroxiredoxin (AhpC)     | Amphibacillus xylanus                |         |                                                |
|         |          | 62738235 pbb                                       | 1WE0           | D Chain D, Crystall Structure Of Peroxiredoxin (AhpC)     | Amphibacillus xylanus                |         |                                                |
|         |          | 62738236 pbb                                       | 1WE0           | E Chain E, Crystall Structure Of Peroxiredoxin (AhpC)     | Amphibacillus xylanus                |         |                                                |
|         |          | 62738237 pbb                                       | 1WE0           | F Chain F, Crystall Structure Of Peroxiredoxin (AhpC)     | Amphibacillus xylanus                |         |                                                |
|         |          | 62738238 pbb                                       | 1WE0           | G Chain G, Crystall Structure Of Peroxiredoxin (AhpC)     | Amphibacillus xylanus                |         |                                                |
|         |          | 62738239 pbb                                       | 1WE0           | H Chain H, Crystall Structure Of Peroxiredoxin (AhpC)     | Amphibacillus xylanus                |         |                                                |
|         |          | 62738240 pbb                                       | 1WE0           | I Chain I, Crystall Structure Of Peroxiredoxin (AhpC)     | Amphibacillus xylanus                |         |                                                |
|         |          | 62738241 pbb                                       | 1WE0           | J Chain J, Crystall Structure Of Peroxiredoxin (AhpC)     | Amphibacillus xylanus                |         |                                                |
| 593     | 0        | 91223047 ref                                       | ZP_01256313.1  | alkyl hydroperoxide reductase c22 protein                 | Vibrio alginolyticus 12G01           | group 2 | VLGGFYPADFTFVCPTEVSTTHKAWHDSSDGLADRAAEEIG      |
|         |          | 153632563 ref                                      | ZP_01985290.1  | peroxiredoxin                                             | Vibrio narveyi HY01                  |         |                                                |
|         |          | 156975992 ref                                      | YP_001446898.1 | alkyl hydroperoxide reductase c22 protein                 | Vibrio narveyi ATCC BAA-11116        |         |                                                |
|         |          | 91191860 gb                                        | EAS78123.1     | alkyl hydroperoxide reductase c22 protein                 | Vibrio alginolyticus 12G01           |         |                                                |
|         |          | 148871149 gb                                       | EDL70027.1     | peroxiredoxin                                             | Vibrio narveyi HY01                  |         |                                                |
|         |          | 166527586 gb                                       | ABL72671.1     | hypothetical protein VB1HAR_04762                         | Vibrio narveyi ATCC BAA-11116        |         |                                                |
| 594     | 0        | 21874312 ref                                       | NP_662377.1    | thioredoxin peroxidase                                    | Chlorobium tepidum TLS               | group 1 | VLVFFYLDFTFVCPTECVSIFHWLNTPKRGGI.GSVALRG       |
|         |          | 21647485 gb                                        | JAAM72719.1    | thioredoxin peroxidase                                    | Chlorobium tepidum TLS               |         |                                                |

| Accession | Gene            | Function                                                 | Organism                              | Group   | Accession | Gene | Function | Organism | Group   |
|-----------|-----------------|----------------------------------------------------------|---------------------------------------|---------|-----------|------|----------|----------|---------|
| 595       | 0 885932.gb     | peroxidase                                               | Mus musculus                          | group 1 |           |      |          |          | group 1 |
| 596       | 0 148544236.ref | Peroxioredoxin                                           | Lactobacillus reuteri F275            | group 2 |           |      |          |          | group 2 |
| 597       | 0 148531330.gb  | Peroxioredoxin                                           | Lactobacillus reuteri F275            | group 1 |           |      |          |          | group 1 |
| 598       | 3.01E-13        | thioredoxin peroxidase                                   | Synechococcus sp. WH 7805             | group 3 |           |      |          |          | group 3 |
| 599       | 0 23500448.ref  | peroxidase                                               | Cytophaga hutchinsonii ATCC 33406     | group 3 |           |      |          |          | group 3 |
| 600       | 0 83269430.ref  | AlpC, alkyl hydroperoxide reductase C                    | Brucella abortus biovar 1 str. 9.941  |         |           |      |          |          |         |
| 601       | 0 154334622.ref | AlpC, alkyl hydroperoxide reductase C                    | Brucella abortus biovar 1 str. 9.941  |         |           |      |          |          |         |
| 602       | 0 70942786.ref  | 2-Cys peroxiredoxin                                      | Plasmodium chabaudi chabaudi          | group 1 |           |      |          |          | group 1 |
| 603       | 0 2498477.sp    | BAS1, HORVU 2-Cys peroxiredoxin BAS1, chloroplast        | Hordeum vulgare subsp. vulgare        | group 1 |           |      |          |          | group 1 |
| 604       | 1.78E-15        | thioredoxin peroxidase                                   | Cryptosporidium parvum Iowa II        | group 1 |           |      |          |          | group 1 |
| 605       | 0 126645720.ref | thioredoxin peroxidase-like protein                      | Cryptosporidium parvum Iowa II        | group 1 |           |      |          |          | group 1 |
| 606       | 3.12E-17        | thioredoxin peroxidase-like protein                      | Cryptosporidium parvum Iowa II        | group 3 |           |      |          |          | group 3 |
| 607       | 1.45E-13        | Alkyl hydroperoxide reductase/Thiol specific antioxidant | Leishmania braziliensis               | group 1 |           |      |          |          | group 1 |
| 608       | 6.25E-17        | cytosolic tyrosine peroxidase                            | Leishmania amazonensis                | group 1 |           |      |          |          | group 1 |
| 609       | 0 29150177.ref  | alkyl hydroperoxide reductase C22 protein                | Helicobacter pylori                   | group 1 |           |      |          |          | group 1 |
| 610       | 0 1492847.ref   | bas1 protein                                             | Spinacia oleracea                     | group 1 |           |      |          |          | group 1 |
| 611       | 0 157825578.ref | Thioredoxin peroxidase 1                                 | Rickettsia akari str. Hartford        | group 1 |           |      |          |          | group 1 |
| 612       | 0 157825578.ref | Thioredoxin peroxidase 1                                 | Rickettsia akari str. Hartford        | group 1 |           |      |          |          | group 1 |
| 613       | 7.84E-14        | peroxiredoxin                                            | Entamoeba nuttalli                    | group 1 |           |      |          |          | group 1 |
| 614       | 1.19E-17        | putative thioredoxin peroxidase                          | Leuvenhoekiella blandensis MED217     | group 4 |           |      |          |          | group 4 |
| 615       | 3.62E-14        | hypothetical protein, conserved                          | Entamoeba dispar SAW760               | group 1 |           |      |          |          | group 1 |
| 616       | 8.47E-16        | alkyl hydroperoxide reductase, C subunit                 | Clostridium perfringens ATCC 1312     | group 2 |           |      |          |          | group 2 |
| 617       | 0 110673878.gb  | alkyl hydroperoxide reductase, C subunit                 | Clostridium perfringens ATCC 13124    | group 1 |           |      |          |          | group 1 |
| 618       | 0 157413379.ref | thioredoxin peroxidase                                   | Prochlorococcus marinus str. MIT 9215 | group 1 |           |      |          |          | group 1 |
| 619       | 0 144898097.ref | thioredoxin peroxidase                                   | Prochlorococcus marinus str. MIT 9215 | group 2 |           |      |          |          | group 2 |
| 620       | 0 125983536.ref | alkyl hydroperoxide reductase                            | Magnetospirillum gypthswaldense MSR-1 | group 1 |           |      |          |          | group 1 |
| 621       | 2.73E-23        | thioredoxin peroxidase                                   | Drosophila pseudoobscura              | group 1 |           |      |          |          | group 1 |
| 622       | 0 126684253.ref | alkyl hydroperoxide reductase C22 subunit                | Trichomonas vaginalis G3              | group 2 |           |      |          |          | group 2 |
| 623       | 0 126684253.ref | alkyl hydroperoxide reductase C22 subunit                | Trichomonas vaginalis G3              | group 1 |           |      |          |          | group 1 |
| 624       | 4.03E-14        | peroxiredoxin                                            | Bacillus sp. B14905                   | group 1 |           |      |          |          | group 1 |
| 625       | 0 16608697.gb   | thioredoxin peroxidase                                   | Microcystis aeruginosa HM-1,IMS5      | group 1 |           |      |          |          | group 1 |
| 626       | 7.82E-17        | alkyl hydroperoxide reductase/Thiol specific antioxidant | Methylobacillus flagellatus KT        | group 1 |           |      |          |          | group 1 |
| 627       | 2.86E-13        | alkyl hydroperoxide reductase/Thiol specific antioxidant | Methylobacillus flagellatus KT        | group 2 |           |      |          |          | group 2 |
| 628       | 0 50897523.gb   | putative thioredoxin peroxidase 1                        | Lactobacillus casei ATCC 334          | group 1 |           |      |          |          | group 1 |
| 629       | 0 29348221.ref  | alkyl hydroperoxide reductase C22 protein                | Bacteroides thetaiotaomicron VPI-5482 | group 2 |           |      |          |          | group 2 |
|           |                 |                                                          | Bacteroides thetaiotaomicron VPI-5482 |         |           |      |          |          |         |

|     |          |            |     |                |                                                              |                                         |         |                                              |
|-----|----------|------------|-----|----------------|--------------------------------------------------------------|-----------------------------------------|---------|----------------------------------------------|
| 630 | 0        | 73977959   | ref | XP_532599.2    | PREDICTED: similar to peroxidoxin 1                          | Canis familiaris                        | group 1 | FFYPLDFTVCPTEVSDSCHLAWINPKQGGVLKLGISFRG      |
| 631 | 0        | 71084310   | gb  | AAZ23600.1     | peroxidoxin 1                                                | Leishmania tropica                      | group 1 | FFYPLDSEVCPTEVSDSVLAALHWLQWTLQDRKGGGLGGVAYRG |
| 632 | 0        | 1258682408 | gb  | EAZ23339.1     | hypothetical protein OsJ_008822                              | Oryza sativa (japonica cultivar group)  | group 1 | FFYPLDFTVCPTEVSDSHLAWVQTDPSGGGLVLLQGLALRG    |
| 633 | 0        | 38239164   | tbl | BAD01572.1     | thioredoxin peroxidase-1                                     | Schistosoma japonicum                   | group 1 | NLKFFYPADFTVCPTECSISHLAWTKQDRSGGLGEGNAFRG    |
| 634 | 1.26E-12 | 15872319   | ref | NP_2668493.1   | alkyl hydroperoxide reductase                                | Lactococcus lactis subsp. lactis I11403 | group 2 | VSDCFYPADFSVCPTEVHAAMHEHSDVLDAGLAQRGADGIG    |
| 635 | 0        | 54301411   | gb  | AAV33160.1     | alkyl hydroperoxide reductase                                | Lactococcus lactis subsp. lactis I11403 | group 1 | FFWPKDFVCPTEVSHVFAWKNTPYKGGIGGEGALRGNMK      |
| 636 | 0        | 47027073   | gb  | AAV08751.1     | 2-cys peroxidoredoxin-like protein                           | Hyacinthus orientalis                   | group 1 | LLTIGFWPKDFVCPTEVSLVGVHFNWRAQCHEDGADRAVSV    |
| 637 | 0        | 13375557   | gb  | AAK20392.1     | hypothetical protein, conserved                              | Entamoeba dispar SAW760                 | group 3 | LLTIGFWPKDFVCPTEVSLVGVHFNWRAQCHEDGADRAVSV    |
| 638 | 7.75E-14 | 165900263  | gb  | EDR26639.1     | hypothetical protein, conserved                              | Entamoeba dispar SAW760                 | group 1 | LLTIGFWPKDFVCPTEVSLVGVHFNWRAQCHEDGADRAVSV    |
| 639 | 0        | 71084308   | gb  | AAZ23599.1     | peroxidoxin 1                                                | Leishmania aethiopia                    | group 1 | LIKAFKFMNLYFLPDWTFVCPTEQLKYSKVGSGVIGYSRRG    |
| 640 | 0        | 118029869  | ref | XP_01500430.1  | alkyl hydroperoxide reductase/Thiol specific antioxidant     | Burkholderia phyatumum S1M815           | group 1 | FFYPLDSEVCPTEVSDSVLAALHWLQWTLQDRKGGGLGGVAYRG |
| 641 | 1.69E-18 | 28198651   | ref | NP_778965.1    | subunit C of alkyl hydroperoxide reductase                   | Xylella fastidiosa Temecula1            | group 3 | YFYPKDFVCPTEVLLVKLAWRREHKFGDVKAGVALRAVSV     |
| 642 | 0        | 28056742   | gb  | AAO28614.1     | subunit C of alkyl hydroperoxide reductase                   | Xylella fastidiosa Temecula1            | group 2 | VLNVFYPADFTVCPTEVSTSHKAWHDIPSGLADRGAEIG      |
| 643 | 0        | 148359891  | ref | YP_001251098.1 | hypothetical protein LPC_1819                                | Legionella pneumophila str. Corby       | group 3 | KATVAVSNFFWPKDFVCPTEVHLAWRNQHPQPEVQRAVLVD    |
| 644 | 0        | 148281664  | gb  | ABQ35752.1     | hypothetical protein LPC_1819                                | Legionella pneumophila str. Corby       | group 1 | FFYPLDFTVCPTEVSDSHLAWIQTPREGVGGVLDSDGVALRG   |
| 645 | 0        | 67854320   | gb  | EAM49618.1     | Alkyl hydroperoxide reductase/Thiol specific antioxidant     | Crocospaera watsonii WH 8501            | group 1 | FFYPLDYTFVCPTECSISHLAWINTPREGGLVYKLEGAIFRG   |
| 646 | 0        | 77955972   | gb  | ABB05536.1     | thioredoxin peroxidase                                       | Ferriprotophagus chinensis              | group 1 | VLVFFYPLDFTVCPSEVSDSHLAWRNTPVDDGGGGMAFRG     |
| 647 | 0        | 110833584  | ref | YP_692443.1    | oxidoreductase                                               | Alcanivorax borkumensis SK2             | group 1 | MLGIGGVFFYPKDFVCPTEVLDGDKDLHKLIPDGVAYRY      |
| 648 | 0        | 110833584  | ref | YP_692443.1    | oxidoreductase                                               | Alcanivorax borkumensis SK2             | group 1 | MLGIGGVFFYPKDFVCPTEVLDGDKDLHKLIPDGVAYRY      |
| 649 | 0        | 110833584  | ref | YP_692443.1    | oxidoreductase                                               | Alcanivorax borkumensis SK2             | group 1 | MLGIGGVFFYPKDFVCPTEVLDGDKDLHKLIPDGVAYRY      |
| 650 | 0        | 1120591    | gb  | AAQ3934.1      | thioredoxin peroxidase (AhpC, Alkyl hydroperoxide reductase) | Chlamydomonas reinhardtii               | group 1 | FFYPLDFTVCPTECSISHLAWINTPREGGLVYKLEGAIFRG    |
| 651 | 0        | 11967729   | gb  | ABM00300.1     | alkyl hydroperoxide reductase/thiol specific antioxidant     | Shewanella amazonensis SB2B             | group 1 | VLVFFYPLDFTVCPSEVSDSHLAWRNTPVDDGGGGMAFRG     |
| 652 | 0        | 11967729   | gb  | ABM00300.1     | alkyl hydroperoxide reductase/thiol specific antioxidant     | Shewanella amazonensis SB2B             | group 1 | VLVFFYPLDFTVCPSEVSDSHLAWRNTPVDDGGGGMAFRG     |
| 653 | 5.15E-14 | 67462360   | ref | XP_647846.1    | peroxidoxin                                                  | Entamoeba histolytica HM-1:IMSS         | group 1 | FFYPLDFTVCPTEVSDSHLAWINTPREGGLVYKLEGAIFRG    |
| 654 | 0        | 67474644   | ref | XP_653071.1    | peroxidoxin                                                  | Entamoeba histolytica HM-1:IMSS         | group 1 | FFYPLDFTVCPTEVSDSHLAWINTPREGGLVYKLEGAIFRG    |
| 655 | 0        | 114525204  | gb  | EAU54964.1     | Alkyl hydroperoxide reductase/Thiol specific antioxidant     | Mariprofundus ferrooxydans PV-1         | group 1 | VLVFFYPLDFTVCPSEVSDSHLAWRNTPVDDGGGGMAFRG     |
| 656 | 0        | 94498872   | ref | XP_01303446.1  | alkyl hydroperoxide reductase/Thiol specific antioxidant     | Mariprofundus ferrooxydans PV-1         | group 2 | FFYPADFTVCPTEVSTCHKAWHDTSPVGLADRGVLDPEGVG    |
| 657 | 1.01E-13 | 6286866    | gb  | AAV06744.1     | peroxidoxin 3 isoform b                                      | Streptomyces coelicolor A3(2)           | group 1 | FFYPLDFTVCPTEVSDSHLAWINTPREGGLVYKLEGAIFRG    |
| 658 | 0        | 56460903   | ref | YP_156184.1    | Peroxiredoxin, AhpC/Tsa family                               | Idiomarina loihiensis L2TR              | group 1 | MLGIGGVFFYPKDFVCPTEVLDGDKDLHKLIPDGVAYRY      |
| 659 | 0        | 146342224  | ref | XP_001207272.1 | Thioredoxin peroxidase (AhpC, Alkyl hydroperoxide reductase) | Bradyrhizobium sp. ORS278               | group 1 | VLVFFYPLDFTVCPSEVSDSHLAWRNTPVDDGGGGMAFRG     |
| 660 | 0        | 89072674   | ref | XP_01159239.1  | putative antioxidant, AhpC/Tsa family protein                | Photobacterium sp. SKA34                | group 1 | VLVFFYPLDFTVCPSEVSDSHLAWRNTPVDDGGGGMAFRG     |
| 661 | 5.52E-13 | 165901730  | gb  | EDR27767.1     | putative antioxidant, AhpC/Tsa family protein                | Photobacterium sp. SKA34                | group 1 | VLVFFYPLDFTVCPSEVSDSHLAWRNTPVDDGGGGMAFRG     |
| 662 | 0        | 152986372  | ref | YP_01350016.1  | probable alkyl hydroperoxide reductase                       | Vibrio cholerae V52                     | group 1 | FFYPLDFTVCPTEVSDSHLAWINTPREGGLVYKLEGAIFRG    |
| 663 | 0        | 15840750   | ref | NP_230380.1    | antioxidant, AhpC/Tsa family                                 | Vibrio cholerae V52                     | group 1 | FFYPLDFTVCPTEVSDSHLAWINTPREGGLVYKLEGAIFRG    |
| 664 | 0        | 121728598  | ref | XP_01681618.1  | antioxidant, AhpC/Tsa family                                 | Vibrio cholerae V52                     | group 1 | FFYPLDFTVCPTEVSDSHLAWINTPREGGLVYKLEGAIFRG    |
| 665 | 0        | 153216124  | ref | XP_01950279.1  | antioxidant, AhpC/Tsa family                                 | Vibrio cholerae 1587                    | group 1 | FFYPLDFTVCPTEVSDSHLAWINTPREGGLVYKLEGAIFRG    |
| 666 | 0        | 153220754  | ref | XP_01951665.1  | antioxidant, AhpC/Tsa family                                 | Vibrio cholerae 1587                    | group 1 | FFYPLDFTVCPTEVSDSHLAWINTPREGGLVYKLEGAIFRG    |
| 667 | 0        | 153802823  | ref | XP_01951409.1  | antioxidant, AhpC/Tsa family                                 | Vibrio cholerae MZO-3                   | group 1 | FFYPLDFTVCPTEVSDSHLAWINTPREGGLVYKLEGAIFRG    |
| 668 | 0        | 153818825  | ref | XP_01971492.1  | antioxidant, AhpC/Tsa family                                 | Vibrio cholerae NCTC 8457               | group 1 | FFYPLDFTVCPTEVSDSHLAWINTPREGGLVYKLEGAIFRG    |
| 669 | 0        | 153823126  | ref | XP_01975793.1  | antioxidant, AhpC/Tsa family                                 | Vibrio cholerae B33                     | group 1 | FFYPLDFTVCPTEVSDSHLAWINTPREGGLVYKLEGAIFRG    |
| 670 | 0        | 153829409  | ref | XP_01982076.1  | antioxidant, AhpC/Tsa family                                 | Vibrio cholerae B33                     | group 1 | FFYPLDFTVCPTEVSDSHLAWINTPREGGLVYKLEGAIFRG    |
| 671 | 0        | 9655175    | gb  | AAI93896.1     | antioxidant, AhpC/Tsa family                                 | Vibrio cholerae 623-39                  | group 1 | FFYPLDFTVCPTEVSDSHLAWINTPREGGLVYKLEGAIFRG    |
| 672 | 0        | 121629106  | gb  | EAX61950.1     | antioxidant, AhpC/Tsa family                                 | Vibrio cholerae V52                     | group 1 | FFYPLDFTVCPTEVSDSHLAWINTPREGGLVYKLEGAIFRG    |
| 673 | 0        | 124114439  | gb  | EAY33259.1     | antioxidant, AhpC/Tsa family                                 | Vibrio cholerae 1587                    | group 1 | FFYPLDFTVCPTEVSDSHLAWINTPREGGLVYKLEGAIFRG    |
| 674 | 0        | 124120318  | gb  | EAY39061.1     | antioxidant, AhpC/Tsa family                                 | Vibrio cholerae MAK 757                 | group 1 | FFYPLDFTVCPTEVSDSHLAWINTPREGGLVYKLEGAIFRG    |
| 675 | 0        | 124121648  | gb  | EAY40391.1     | antioxidant, AhpC/Tsa family                                 | Vibrio cholerae NCTC 8457               | group 1 | FFYPLDFTVCPTEVSDSHLAWINTPREGGLVYKLEGAIFRG    |
| 676 | 0        | 125619633  | gb  | EAY248160.1    | antioxidant, AhpC/Tsa family                                 | Vibrio cholerae MO-3                    | group 1 | FFYPLDFTVCPTEVSDSHLAWINTPREGGLVYKLEGAIFRG    |
| 677 | 0        | 126510607  | gb  | EAZ73201.1     | antioxidant, AhpC/Tsa family                                 | Vibrio cholerae MO10                    | group 1 | FFYPLDFTVCPTEVSDSHLAWINTPREGGLVYKLEGAIFRG    |
| 678 | 0        | 126519343  | gb  | EAZ76966.1     | antioxidant, AhpC/Tsa family                                 | Vibrio cholerae NCTC-8457               | group 1 | FFYPLDFTVCPTEVSDSHLAWINTPREGGLVYKLEGAIFRG    |

Table with columns for accession numbers, descriptions, and protein domains. Accession numbers include AF322012.66, AF322012.66, AF322012.66, etc. Descriptions include 'antioxidant, AhpC/Tsa family', 'iron repressible polyketide (putative reductase)', etc. Domains listed include 'Mycobacterium Tuberculosis AhpC', 'Echinococcus granulosus AhpC', etc.





|     |           |           |            |                 |                                                          |                                           |                                              |                                              |
|-----|-----------|-----------|------------|-----------------|----------------------------------------------------------|-------------------------------------------|----------------------------------------------|----------------------------------------------|
| 719 | 7.24E-17  | 148653936 | ref        | YP_001281029.1  | Peroxioredoxin                                           | Psychrobacter sp. PrwF-1                  | group 2                                      | MFYPLDFTFVCPTEVSTTHKAWHDSSEVMIAGLAERGAGGIG   |
| 720 | 148573020 | gb        | ABO95079.1 | Peroxioredoxin  | Psychrobacter sp. PrwF-1                                 | group 1                                   | YSVELKFFYPLDFTVCPTEIETHLAWINTPRQGGIGSGHTLRLG |                                              |
|     | 0         | 27908085  | ref        | NP_776888.1     | Bos taurus                                               |                                           |                                              |                                              |
|     |           | Z2095987  | sp         | Q9BGJ2          | Bos taurus                                               |                                           |                                              |                                              |
|     |           | 12407849  | gb         | AAG536360.1     | Bos taurus                                               |                                           |                                              |                                              |
|     |           | 81673557  | gb         | AA09825.1       | Bos taurus                                               |                                           |                                              |                                              |
| 721 | 0         | 90076926  | dbi        | BAE88143.1      | unnamed protein product                                  | Macaca fascicularis                       | group 1                                      | FFYPLDFTFVCPTEVSVTHLAWINTPREGGLVLEKGIAYRG    |
| 722 | 1.76E-18  | 146299873 | ref        | YP_001194464.1  | alkyl hydroperoxide reductase/Thiol specific antioxidant | Flavobacterium johnsoniae UW101           | group 4                                      | NLKFYPKDFTFVCPTEVHFAMLNTPKNGGIESVYTRAST      |
| 723 | 0         | 157146780 | ref        | YP_001454098.1  | alkyl hydroperoxide reductase/Thiol specific antioxidant | Flavobacterium johnsoniae UW101           | group 2                                      | FFYPADFTFVCPTEVSTTHKAWHSSSEEGADRRAEIGVGK     |
| 724 | 6.51E-12  | 157083985 | gb         | ABY13663.1      | hypothetical protein CKO_02554                           | Citrobacter koseri ATCC BAA-895           | group 3                                      | MLGIGVGVFYPKDFTFVCPTEVSTHLEWLNKPRHGGVAVRYVLD |
| 725 | 0         | 83951679  | gb         | EA098534.1      | AhpC, alkyl hydroperoxide reductase C                    | Oceaniculis alexandrii HCC02833           | group 1                                      | VLGFYPKDFTFVCPSEVSCCHFAWRETIDVCGGIGEAVALRG   |
| 726 | 0         | 118475037 | ref        | YP_891456.1     | alkyl hydroperoxide reductase TsaA                       | Campylobacter fetus subsp. fetus 82-40    | group 1                                      | FFYPLDFTFVCPTECVTHLAWINTPRQGGIGVLOSQVPRFRG   |
|     |           | 118414263 | gb         | ABK62883.1      | alkyl hydroperoxide reductase TsaA                       | Campylobacter fetus subsp. fetus 82-40    |                                              |                                              |
|     |           | 157104532 | ref        | XP_001668452.1  | peroxiredoxins, prx-1, prx-2, prx-3                      | Aedes aegypti                             | group 1                                      |                                              |
|     |           | 17225115  | gb         | AA137254.1      | 2-Cys thioredoxin peroxidase                             | Aedes aegypti                             | group 1                                      |                                              |
| 727 | 0         | 108880316 | gb         | EAT14454.1      | peroxiredoxins, prx-1, prx-2, prx-3                      | Aedes aegypti                             | group 1                                      | VLVFFWPLDFTFVCPSEVSIHHAWRKTPHKGGIGAGVALRA    |
| 728 | 0         | 91798166  | gb         | ABE60305.1      | alkyl hydroperoxide reductase/Thiol specific antioxidant | Chromohalobacter salexigenis DSM 3043     | group 1                                      | NMKFFYPLDFTFVCPSEVSVSHLAWKNTPHKGGIGGGISLRG   |
| 729 | 0         | 91069074  | gb         | ABE04795.1      | Thioredoxin peroxidase 1                                 | Rickettsia belli RML369-C                 | group 1                                      | FFYPLDFTFVCPTECVSTHLEWLNKPRHGGVLAAGIARFRG    |
| 730 | 5.56E-12  | 120610062 | ref        | YP_969740.1     | alkyl hydroperoxide reductase/Thiol specific antioxidant | Acidovorax avenae subsp. citrulli AAC00-1 | group 2                                      | NLKFMAAFTFNCPTESHKVVHETSDEGLALRDGDVWIKYSE    |
| 731 | 1.25E-12  | 145698435 | dbi        | BAF57012.1      | peroxiredoxin                                            | Entamoeba nutalli                         | group 1                                      | RIKAKFKFNLFYPLDWTFCVTEQLKVSVKRKGAGIARRG      |
| 732 | 0         | 51209959  | ref        | YP_0636923.1    | thiol-specific antioxidant protein                       | Gracilaria tenuisulcata var. lili         | group 1                                      | CSLIFYPLDFTFVCPTEVLSHLAWLQMERIGGLGEGKALRG    |
| 733 | 0         | 50657713  | gb         | AA179689.1      | thiol-specific antioxidant protein                       | Gracilaria tenuisulcata var. lili         | group 1                                      | VLVFFYPLDFTFVCPSEVSIHHAWRNTPVKGIGAGVAFRG     |
| 734 | 0         | 163781576 | ref        | ZP_02716576.1   | alkyl hydroperoxide reductase                            | Shewanella frigidimarina NCIMB 400        | group 1                                      | TGGFGFFYPADFTFVCPTEVSVVHLAWQRSEKTLGALRGVWRK  |
| 735 | 0         | 114562632 | ref        | YP_750145.1     | alkyl hydroperoxide reductase/Thiol specific antioxidant | Shewanella frigidimarina NCIMB 400        | group 4                                      | YFYPKDFTFVCPTECVSTHLEWLNKPRHGGVLAAGIARFRG    |
| 736 | 0         | 33089110  | gb         | AA098384.1      | thioredoxin peroxidase                                   | Shewanella frigidimarina NCIMB 400        | group 1                                      | FFYPLDFTFVCPTEVSTHLEWLNKPRHGGVLAAGIARFRG     |
| 737 | 2.89E-14  | 29011913  | ref        | NP_736308.1     | hypothetical protein gbs1874                             | Streptococcus agalactiae NEM316           | group 2                                      | CFYPADFSVCPTEVSTVHKAWHDSVLDGSLAQRGADGIG      |
|     |           | 76787981  | ref        | YP_330450.1     | alkyl hydroperoxide reductase, subunit C                 | Streptococcus agalactiae A909             |                                              |                                              |
|     |           | 77408422  | ref        | ZP_00785161.1   | alkyl hydroperoxide reductase, subunit C                 | Streptococcus agalactiae COH1             |                                              |                                              |
|     |           | 77411552  | ref        | ZP_00787895.1   | alkyl hydroperoxide reductase, subunit C                 | Streptococcus agalactiae COH1             |                                              |                                              |
|     |           | 24413455  | emb        | CAD47533.1      | Unknown                                                  | Streptococcus agalactiae NEM316           |                                              |                                              |
|     |           | 76563038  | gb         | ABA45622.1      | alkyl hydroperoxide reductase, subunit C                 | Streptococcus agalactiae A909             |                                              |                                              |
|     |           | 77162406  | gb         | EA073374.1      | alkyl hydroperoxide reductase, subunit C                 | Streptococcus agalactiae CjB111           |                                              |                                              |
|     |           | 77172945  | gb         | EA076075.1      | alkyl hydroperoxide reductase, subunit C                 | Streptococcus agalactiae COH1             |                                              |                                              |
| 738 | 0         | 29150165  | emb        | CAD79626.1      | alkyl hydroperoxide reductase C22 protein                | Helicobacter pylori                       | group 1                                      | FFYPLDFTFVCPTEVSVHFAWNTPKVKGIGAGIARRG        |
|     |           | 29150173  | emb        | CAD79630.1      | alkyl hydroperoxide reductase C22 protein                | Helicobacter pylori                       |                                              |                                              |
|     |           | 29150175  | emb        | CAD79631.1      | alkyl hydroperoxide reductase C22 protein                | Helicobacter pylori                       |                                              |                                              |
|     |           | 29150181  | emb        | CAD79634.1      | alkyl hydroperoxide reductase C22 protein                | Helicobacter pylori                       |                                              |                                              |
| 740 | 0         | 152990141 | ref        | YP_0013558663.1 | peroxiredoxin, AhpC/Tsa family                           | Nitratiruptor sp. SBT155-2                | group 1                                      | FFYPLDFTFVCPSECVTHLAWKNTPKVKGIGVLLAGVALRG    |
| 741 | 0         | 151420202 | dbi        | BAF69506.1      | peroxiredoxin, AhpC/Tsa family                           | Tribolium castaneum                       | group 1                                      | FFYPLDFTFVCPTEVSTHLEWLNKPRHGGVLAAGIARFRG     |
| 742 | 1.14E-14  | 27469275  | ref        | NP_765912.1     | PREDICTED: similar to CG1633-PA, isoform A               | Staphylococcus epidermidis ATCC 12228     | group 2                                      | CFYPADFSVCPTEVSTVHKAWHDSVLDGSLAQRGADGIG      |
|     |           | 38604793  | sp         | Q8CNIQ2         | AhpC, STAES Alkyl hydroperoxide reductase subunit        | Staphylococcus epidermidis ATCC 12228     |                                              |                                              |
| 743 | 1.33E-15  | 146418172 | ref        | XP_001485052.1  | peroxiredoxin TSA1                                       | Pichia guilliermondii ATCC 6260           | group 1                                      | AFIPLAFTVCPTESSLAWNTVARDGGGLVLEGLVALRGVDS    |
|     |           | 146390525 | gb         | EDK386883.1     | peroxiredoxin TSA1                                       | Pichia guilliermondii ATCC 6260           |                                              |                                              |
| 744 | 0         | 70951732  | ref        | XP_745083.1     | thioredoxin peroxidase                                   | Plasmodium chabaudi chabaudi              | group 1                                      | VLNFFYPLNYTFVCPTEVSISSHMAWKNMIPKGGIGNSFALRG  |
| 745 | 0         | 56826292  | emb        | CAH74582.1      | thioredoxin peroxidase, putative                         | Plasmodium chabaudi                       | group 1                                      | VLVFFYPLDFTFVCPSEVSIHHAWRNTPVKGIGAGVAFRRG    |
| 746 | 6.27E-15  | 165901318 | gb         | EDR27405.1      | antioxidant, AhpC/Tsa family protein                     | Shewanella benthica KT199                 | group 1                                      | SCNQKQWVRVAVKLYPLDWTFCVPTSEVSKVGGVGTGVSRRG   |
| 747 | 0         | 1717797   | sp         | P52552          | hypothetical protein, conserved                          | Entamoeba dispar SAM760                   | group 1                                      | FFYPLDFTFVCPTEVSTHLEWLNKPRHGGVLAAGIARFRG     |
| 748 | 5.69E-10  | 13186345  | gb         | AAK15366.1      | alkyl hydroperoxide reductase small subunit              | Candidatus Carsonella ruddii              | outlier                                      | FFYPSFTFCPTENIKISTHKKWIESELPISEDFNKAIG       |
| 749 | 8.35E-12  | 16377323  | gb         | EDQ8489.1       | predicted protein                                        | Monosiga brevicollis MX1                  | group 1                                      | AVPYLDWTFCVPTSEIDSHLAWAQHPHPRDGLAEGCALRGVLR  |
| 750 | 5.63E-12  | 163766373 | ref        | ZP_02173399.1   | alkyl hydroperoxide reductase/Thiol specific antioxidant | Anaeromyxobacter sp. K                    | outlier                                      | LFYPRDFTAVCPTELRGALGISVTHRRWEEKLEGVAARAVLE   |
| 751 | 0         | 160353198 | gb         | EDP79883.1      | alkyl hydroperoxide reductase/Thiol specific antioxidant | Anaeromyxobacter sp. K                    | group 1                                      | FFYPLDFTFVCPTEVSVTHLAWINTPREGGLVLEKGIAYRG    |
| 752 | 0         | 50085223  | ref        | YP_046733.1     | thioredoxin peroxidase 1-like                            | synthetic construct                       | group 2                                      | FFYPADFTFVCPTEVSTTHKAWHDTSEVLAIGLADRAGAGGIG  |
|     |           | 49531199  | emb        | CAG68911.1      | alkyl hydroperoxide reductase, C22 subunit, thioredoxin  | Aerobacter sp. ADP1                       | group 1                                      | VLVFFYPLDFTFVCPTECVSHLAWLKITPRQGGIEEGVSVYRG  |
| 753 | 0         | 67939924  | ref        | ZP_00532404.1   | Alkyl hydroperoxide reductase/Thiol specific antioxidant | Chlorobium phaeoaceticum BS1              | group 1                                      |                                              |

|     |          |           |     |                |                                                          |                                    |  |         |                                             |
|-----|----------|-----------|-----|----------------|----------------------------------------------------------|------------------------------------|--|---------|---------------------------------------------|
| 754 | 0        | 158593224 | gb  | EA063218.1     | alkyl hydroperoxide reductase/Thiol specific antioxidant | Chlorobium phaeobacteroides BS1    |  | group 1 | VLASITLAGEFYPLDFTFCVPTTECSGSHLAWICTPREGGLG  |
| 755 | 0        | 158335840 | ref | YP_00157014.1  | AhpC/TSA family protein                                  | Brugia malayi                      |  | group 1 | FFYPLDFTFCVPTTEVLSGSHLAWITQIDRSGGVSTAGVALRG |
| 756 | 0        | 158306081 | gb  | ABWZ17696.1    | 2-cys peroxiredoxin, putative                            | Acanyochloris marina MBIC11017     |  | group 1 | VSALFPLAFTEVCPTESSLLAWTNPREGGLGVLEGVVALRG   |
| 757 | 5.39E-17 | 6323613   | ref | NP_013684.1    | unnamed protein product                                  | Tetraodon nigroviridis             |  | group 1 | VSLAFPLDFTFCVPTTEHAWNTARQGGGLGGQHTLRVLR     |
| 758 | 0        | 47227198  | emb | CAG00560.1     | Tsa1p                                                    | Saccharomyces cerevisiae           |  | group 1 | VSLAFPLDFTFCVPTTESSLLAWTNPREGGLGVLEGVVALRG  |
| 759 | 0        | 114327344 | ref | YP_744501.1    | thiol-specific antioxidant protein                       | Saccharomyces cerevisiae           |  |         |                                             |
| 760 | 4.10E-14 | 151946133 | gb  | EDN64364.1     | TSA                                                      | Saccharomyces cerevisiae           |  |         |                                             |
| 761 | 0        | 83594229  | ref | YP_427981.1    | antioxidant: AhpC/TSA family                             | Saccharomyces cerevisiae YJM789    |  | outlier | VFYPLDFTFCVPTSEISLHAWLQMDLDGFAQRAVLIKGGAG   |
| 762 | 0        | 163789074 | ref | ABC23694.1     | antioxidant: AhpC/TSA family                             | Babesia bovis T2Bo                 |  | group 3 | KEGLDFWPKDFTFCVPTTEVAFAKLNSDFVSTEGVAQRAVL   |
| 763 | 3.08E-12 | 125923226 | ref | YP_001031709.1 | putative thioredoxin peroxidase                          | Granulibacter theohadensis CGDNIH1 |  | group 1 | RIKAFKFINLIFYPLDFTFCVPTTEQLKVSXKGGVAGIARRRG |
| 764 | 0        | 1498198   | emb | CAA633909.1    | putative thioredoxin peroxidase                          | Granulibacter theohadensis CGDNIH1 |  | group 1 | VLAFFYPLDFTFCVPTSEISLHAWKKTPIEGGLGTGVALRA   |
| 765 | 0        | 131774    | sp  | P231161        | alkyl hydroperoxide reductase subunit C                  | Enhanobeta histolytica HM-1:IMSS   |  | group 1 | VLVFFYPKDFTEVCPTEVSTSHFGLQMDKGGIKELIAYRG    |
| 766 | 0        | 84386690  | ref | YP_00989716.1  | alkyl hydroperoxide reductase c22 protein                | Rhodospirillum rubrum ATCC 11170   |  | group 1 | VSDCFYPADFSVCPTEVHAAMHDSVDLDAISLAQRGADGIG   |
| 767 | 0        | 15786950  | ref | XP_001683326.1 | 2-Cys peroxiredoxin bas1                                 | Rhodospirillum rubrum ATCC 11170   |  | group 1 | ISSFFYPDLDFVCPTEVLSGSHLAWVQTDPSGGGLGGQIALRG |
| 768 | 2.59E-18 | 150017004 | ref | YP_001309258.1 | 2-Cys peroxiredoxin                                      | Arabidopsis thaliana               |  | group 1 | FFYPLDFTFCVPTTESHTWINDIQDGGI.VSTEGISLRLVLIK |
| 769 | 0        | 90414604  | ref | YP_01222577.1  | putative antioxidant: AhpC/Tsa family protein            | Clostridium pasteurianum           |  | group 2 | FFYPADFTFCVPTTEVSTSHKAWHDTSDOGLADRAAEGIGVGK |
| 770 | 0        | 52843159  | ref | YP_098958.1    | putative antioxidant: AhpC/Tsa family protein            | Vibrio sp. MED222                  |  | group 1 |                                             |
| 771 | 0        | 15846170  | ref | NP_208354.1    | peroxynitrite reductase: AhpC/Tsa family                 | Vibrio splendens 12B01             |  | group 1 |                                             |
| 772 | 0        | 125805298 | ref | XP_001340642.1 | peroxynitrite reductase: AhpC/Tsa family                 | Vibrio sp. MED222                  |  | group 1 |                                             |
| 773 | 4.80E-16 | 148556489 | ref | YP_001284071.1 | peroxynitrite reductase: AhpC/Tsa family                 | Vibrio splendens 12B01             |  | group 1 |                                             |
| 774 | 0        | 148501679 | gb  | ABQ68933.1     | peroxynitrite reductase: AhpC/Tsa family                 | Vibrio sp. MED222                  |  | group 1 |                                             |
| 775 | 2.75E-11 | 149240585 | ref | XP_001526168.1 | peroxynitrite reductase: AhpC/Tsa family                 | Vibrio sp. MED222                  |  | group 1 |                                             |
| 776 | 0        | 83315146  | ref | XP_730667.1    | peroxynitrite reductase: AhpC/Tsa family                 | Vibrio sp. MED222                  |  | group 1 |                                             |
| 777 | 0        | 157738098 | ref | YP_001490782.1 | peroxynitrite reductase: AhpC/Tsa family                 | Vibrio sp. MED222                  |  | group 1 |                                             |
| 778 | 0        | 155996045 | ref | NP_249539.1    | peroxynitrite reductase: AhpC/Tsa family                 | Vibrio sp. MED222                  |  | group 1 |                                             |
| 779 | 0        | 126198511 | gb  | EA262574.1     | peroxynitrite reductase: AhpC/Tsa family                 | Vibrio sp. MED222                  |  | group 1 |                                             |
| 780 | 0        | 126198511 | gb  | EA262574.1     | peroxynitrite reductase: AhpC/Tsa family                 | Vibrio sp. MED222                  |  | group 1 |                                             |
| 781 | 0        | 126198511 | gb  | EA262574.1     | peroxynitrite reductase: AhpC/Tsa family                 | Vibrio sp. MED222                  |  | group 1 |                                             |
| 782 | 0        | 126198511 | gb  | EA262574.1     | peroxynitrite reductase: AhpC/Tsa family                 | Vibrio sp. MED222                  |  | group 1 |                                             |
| 783 | 0        | 126198511 | gb  | EA262574.1     | peroxynitrite reductase: AhpC/Tsa family                 | Vibrio sp. MED222                  |  | group 1 |                                             |
| 784 | 0        | 126198511 | gb  | EA262574.1     | peroxynitrite reductase: AhpC/Tsa family                 | Vibrio sp. MED222                  |  | group 1 |                                             |
| 785 | 0        | 126198511 | gb  | EA262574.1     | peroxynitrite reductase: AhpC/Tsa family                 | Vibrio sp. MED222                  |  | group 1 |                                             |
| 786 | 0        | 126198511 | gb  | EA262574.1     | peroxynitrite reductase: AhpC/Tsa family                 | Vibrio sp. MED222                  |  | group 1 |                                             |
| 787 | 0        | 126198511 | gb  | EA262574.1     | peroxynitrite reductase: AhpC/Tsa family                 | Vibrio sp. MED222                  |  | group 1 |                                             |
| 788 | 0        | 126198511 | gb  | EA262574.1     | peroxynitrite reductase: AhpC/Tsa family                 | Vibrio sp. MED222                  |  | group 1 |                                             |
| 789 | 0        | 126198511 | gb  | EA262574.1     | peroxynitrite reductase: AhpC/Tsa family                 | Vibrio sp. MED222                  |  | group 1 |                                             |
| 790 | 0        | 126198511 | gb  | EA262574.1     | peroxynitrite reductase: AhpC/Tsa family                 | Vibrio sp. MED222                  |  | group 1 |                                             |
| 791 | 0        | 126198511 | gb  | EA262574.1     | peroxynitrite reductase: AhpC/Tsa family                 | Vibrio sp. MED222                  |  | group 1 |                                             |
| 792 | 0        | 126198511 | gb  | EA262574.1     | peroxynitrite reductase: AhpC/Tsa family                 | Vibrio sp. MED222                  |  | group 1 |                                             |
| 793 | 0        | 126198511 | gb  | EA262574.1     | peroxynitrite reductase: AhpC/Tsa family                 | Vibrio sp. MED222                  |  | group 1 |                                             |
| 794 | 0        | 126198511 | gb  | EA262574.1     | peroxynitrite reductase: AhpC/Tsa family                 | Vibrio sp. MED222                  |  | group 1 |                                             |
| 795 | 0        | 126198511 | gb  | EA262574.1     | peroxynitrite reductase: AhpC/Tsa family                 | Vibrio sp. MED222                  |  | group 1 |                                             |
| 796 | 0        | 126198511 | gb  | EA262574.1     | peroxynitrite reductase: AhpC/Tsa family                 | Vibrio sp. MED222                  |  | group 1 |                                             |
| 797 | 0        | 126198511 | gb  | EA262574.1     | peroxynitrite reductase: AhpC/Tsa family                 | Vibrio sp. MED222                  |  | group 1 |                                             |
| 798 | 0        | 126198511 | gb  | EA262574.1     | peroxynitrite reductase: AhpC/Tsa family                 | Vibrio sp. MED222                  |  | group 1 |                                             |
| 799 | 0        | 126198511 | gb  | EA262574.1     | peroxynitrite reductase: AhpC/Tsa family                 | Vibrio sp. MED222                  |  | group 1 |                                             |
| 799 | 0        | 157929894 | gb  | ABW04135.1     | natural killer cell enhancement factor                   | Epinephelus coioides               |  | group 1 | FFYPMDFTEVCPTEVDSCHLAWINKPROGGLGVLIKGLSYRG  |

|     |          |            |     |                |                                                           |                                                       |  |  |         |                                              |
|-----|----------|------------|-----|----------------|-----------------------------------------------------------|-------------------------------------------------------|--|--|---------|----------------------------------------------|
| 780 | 4.28E-09 | 1491771.12 | ref | ZP_01855719.1  | 2-cys peroxiredoxin                                       | Planomyces maris DSM 8797                             |  |  | outlier | IFYPHDFVCPTEVSIHSSQWLQTPAQGALCVLDDGVLDTA     |
|     |          | 1488440.04 | gb  | EDL58360.1     | 2-cys peroxiredoxin                                       | Planomyces maris DSM 8797                             |  |  | group 1 | FFYPLDFTVCPTEVSVSHLAWLQIDRSGGGLGVINGVALRG    |
| 781 | 0        | 11465738   | ref | NP_053882.1    | hypothetical protein PopuCP087                            | Porphyra purpurea                                     |  |  | group 1 |                                              |
|     |          | 1723344    | sp  | P51Z72         | YCF42_PORPU Putative peroxiredoxin ycf42 (Thio)           | Porphyra purpurea                                     |  |  |         |                                              |
|     |          | 1276738    | gb  | AAC08159.1     | ORF199                                                    | Porphyra purpurea                                     |  |  |         |                                              |
| 782 | 2.96E-17 | 30250396   | ref | NP_842456.1    | Alkyl hydroperoxide reductase/ Thiol specific antioxidant | Nitrosomonas europaea ATCC 19718                      |  |  | group 2 | NTTVKVFYPADFTFVCPTEVSTTHKAWHDTSVLIAGLALRG    |
|     |          | 30181181   | emb | CAD86377.1     | Alkyl hydroperoxide reductase/ Thiol specific antioxidant | Nitrosomonas europaea ATCC 19718                      |  |  |         |                                              |
| 783 | 3.69E-15 | 34762764   | ref | ZP_00143742.1  | Alkyl hydroperoxide reductase C22                         | Fusobacterium nucleatum subsp. vincentii ATCC 49256   |  |  | group 2 | VFYPADFTFVCPTEVSVHKAHWADHSEYMIIEGLALRDNIGIG  |
|     |          | 27887555   | gb  | EA424636.1     | Alkyl hydroperoxide reductase C22                         | Fusobacterium nucleatum subsp. vincentii ATCC 49256   |  |  |         |                                              |
| 784 | 0        | 157962395  | ref | NP_001502429.1 | alkyl hydroperoxide reductase/ Thiol specific antioxidant | Shewanella pealeana ATCC 700345                       |  |  | group 1 | VLVFFYPLDFTFVCPSEVSIHNAWRNITPVKGGIGAGVAFRG   |
|     |          | 157847395  | gb  | ABV87894.1     | alkyl hydroperoxide reductase/ Thiol specific antioxidant | Shewanella pealeana ATCC 700345                       |  |  |         |                                              |
|     |          | 11558242   | emb | CAC17803.1     | peroxiredoxin                                             | Phaseolus vulgaris                                    |  |  | group 1 | FFYPLDFTVCPTEVSVSHLAWWVQIDRSGLGVLIQIAGLRG    |
|     |          | 11558244   | emb | CAC17804.1     | peroxiredoxin                                             | Phaseolus vulgaris                                    |  |  |         |                                              |
| 786 | 0        | 118093103  | ref | XP_426543.2    | PREDICTED: similar to Prdx3 protein                       | Gallus gallus                                         |  |  | group 1 | FFYPLDFTVCPTEVSVCHLAWINTPRSSGGLGVLSFGIALRG   |
| 787 | 0        | 54301429   | gb  | AAV33169.1     | alkyl hydroperoxide reductase                             | Helicobacter pylori                                   |  |  | group 1 | FFWPKDFTFVCPTEVSVHFVAHWNTPVKGGIGEGIALRGNMK   |
| 788 | 5.01E-22 | 149181332  | ref | ZP_01859829.1  | alkyl hydroperoxide reductase                             | Bacillus sp. SG-1                                     |  |  | group 1 | NMKFFYPMDFSLFCPTTEVSTTHLAWINTDREGVALRGTGLCL  |
|     |          | 148850895  | gb  | EDL65048.1     | YkuU                                                      | Bacillus sp. SG-1                                     |  |  |         |                                              |
| 789 | 2.03E-14 | 118395270  | ref | XP_001023987.1 | AhpC/TSA family protein                                   | Tetrahymena thermophila SB210                         |  |  | group 1 | FFYPDFFTVCPTEVLGVHAEWCKPREGGGLGKGAAYRGISI    |
|     |          | 89284270   | gb  | EAR82324.1     | AhpC/TSA family protein                                   | Tetrahymena thermophila SB210                         |  |  |         |                                              |
| 790 | 0        | 16800713   | ref | NP_470981.1    | hypothetical protein lin1645                              | Listeria innocua ClpJ11262                            |  |  | group 1 | VSLFFYPMDFTVCPTEVSHLAWINTPIEGGIVLIEGVIALRG   |
|     |          | 16414132   | emb | CAC86876.1     | lin1645                                                   | Listeria innocua                                      |  |  |         |                                              |
| 791 | 4.90E-13 | 115372324  | ref | ZP_01459633.1  | alkyl hydroperoxide reductase                             | Stigmatella aurantiaca DW4/3-1                        |  |  | group 3 | FAWPKDFTFICPTTEVLGTHHADLKNLPTNALGEGVALRAVSV  |
|     |          | 115370537  | gb  | EALU69463.1    | alkyl hydroperoxide reductase                             | Stigmatella aurantiaca DW4/3-1                        |  |  |         |                                              |
| 792 | 4.54E-11 | 165896307  | gb  | EDR23761.1     | hypothetical protein, conserved                           | Entamoeba dispar SAW760                               |  |  | outlier | RIKAKFKEMKKAQIGLFLYPLDWFVCPTESEVAGOLVSVWIK   |
| 793 | 0        | 11605946   | emb | CAL55168.1     | thioredoxin peroxidase (TS)                               | Ostreococcus tauri                                    |  |  | group 1 | FFYPLDFTFVCPTEVLGVSSHLAWLQIDRDGGGLDGTALRG    |
| 794 | 0        | 158319348  | ref | YP_001517855.1 | alkyl hydroperoxide reductase/ Thiol specific antioxidant | Alkaliphilus oremlandii OhILa5                        |  |  | group 1 | FFYPLDFTFVCPTEVSHKAWNAQKGGIGEGIALRGVLR       |
|     |          | 158139547  | gb  | ABW17859.1     | alkyl hydroperoxide reductase/ Thiol specific antioxidant | Alkaliphilus oremlandii OhILa5                        |  |  |         |                                              |
| 796 | 0        | 148232668  | ref | NP_001085918.1 | MGC82793 protein                                          | Xenopus laevis                                        |  |  | group 1 | FFYPLDFTFVCPTECSVTHLAWINTPRQGGIGOGHTLRGLR    |
|     |          | 49118952   | gb  | AAH73532.1     | MGC82793 protein                                          | Xenopus laevis                                        |  |  |         |                                              |
|     |          | 34540424   | ref | NP_904903.1    | alkyl hydroperoxide reductase, C subunit                  | Porphyromonas gingivalis W83                          |  |  | group 2 | VFYPGDFTFVCPTEGCVHKAWADSPVHMAYRGGQTLKVGK     |
| 797 | 3.54E-11 | 34540424   | ref | NP_904903.1    | alkyl hydroperoxide reductase, C subunit                  | Porphyromonas gingivalis W83                          |  |  |         |                                              |
|     |          | 34396737   | gb  | AAQ65802.1     | alkyl hydroperoxide reductase, C subunit                  | Porphyromonas gingivalis W83                          |  |  | group 2 | W5VIFVPAFAFVFNCPTEVSHKWHETSPVKGEGALRGEVVK    |
| 798 | 6.24E-12 | 21230308   | ref | NP_636225.1    | alkyl hydroperoxide reductase subunit C                   | Xanthomonas campestris pv. campestris str. ATCC 33913 |  |  | group 2 |                                              |
|     |          | 67679688   | ref | YP_244640.1    | alkyl hydroperoxide reductase subunit C                   | Xanthomonas campestris pv. campestris str. 8004       |  |  |         |                                              |
|     |          | 21111858   | gb  | AAAM0149.1     | alkyl hydroperoxide reductase subunit C                   | Xanthomonas campestris pv. campestris str. ATCC 33913 |  |  |         |                                              |
|     |          | 66575030   | gb  | AAV50440.1     | alkyl hydroperoxide reductase subunit C                   | Xanthomonas campestris pv. campestris str. 8004       |  |  |         |                                              |
| 799 | 0        | 68551025   | ref | ZP_00590496.1  | Alkyl hydroperoxide reductase/ Thiol specific antioxidant | Xanthomonas campestris pv. campestris str. 8004       |  |  | group 1 | FFYPLDFTFVCPTECSVSHYAWIRTPRQGGIVLLAGIALRG    |
|     |          | 68242108   | gb  | EAHZ4338.1     | Alkyl hydroperoxide reductase/ Thiol specific antioxidant | Xanthomonas campestris pv. campestris str. 8004       |  |  |         |                                              |
| 800 | 0        | 145483021  | ref | XP_001427533.1 | hypothetical protein GSPAT10030773001                     | Paramecium tetraurelia                                |  |  | group 1 | VNGSFKKVSLLFFYPDLDFVCPTEVSVQGGI.GVLIFGVAFRG  |
|     |          | 124394615  | emb | CAG60135.1     | unnamed protein product                                   | Paramecium tetraurelia                                |  |  |         |                                              |
| 801 | 0        | 91778042   | ref | YP_545798.1    | alkyl hydroperoxide reductase/ Thiol specific antioxidant | Methylobacillus flagellatus KT                        |  |  | group 1 | VLVFFYPLDFTFVCPSEVSIHAWKNTPVKGGIGGGVAYVRG    |
|     |          | 91710029   | gb  | ABE49957.1     | alkyl hydroperoxide reductase/ Thiol specific antioxidant | uncultured methanogenic archaeon RC-1                 |  |  | group 2 | IFYPADFTFVCPTEFSVWHKAWHDNSPEGVSRLADGYLKVGK   |
| 802 | 5.51E-17 | 147920432  | ref | NP_685777.1    | 2-cysteine peroxiredoxin                                  | uncultured methanogenic archaeon RC-1                 |  |  | group 2 |                                              |
|     |          | 110621173  | emb | CAJ36451.1     | 2-cysteine peroxiredoxin                                  | uncultured methanogenic archaeon RC-1                 |  |  |         |                                              |
| 803 | 0        | 112982996  | ref | NP_001037083.1 | thiol peroxiredoxin                                       | Bombax mori                                           |  |  | group 1 | FFYPLDFTFVCPTEVLGTHLAWINTPRQGGIGLGTGIPFRGRSV |
|     |          | 38260562   | gb  | AAK15420.1     | thiol peroxiredoxin                                       | Bombax mori                                           |  |  |         |                                              |
| 804 | 0        | 118358822  | ref | XP_001013149.1 | Thioredoxin-dependent peroxide reductase, mitochon        | Tetrahymena thermophila SB210                         |  |  | group 1 | FFYPLDFTFVCPTECSIEGGLGVLTGGIALRGTSKYWKNVHA   |
|     |          | 89294916   | gb  | EAR92904.1     | Thioredoxin-dependent peroxide reductase, mitochon        | Tetrahymena thermophila SB210                         |  |  |         |                                              |
| 805 | 0        | 158853196  | dbj | BATF91446.1    | peroxiredoxin                                             | Marsipenaes japonicus                                 |  |  | group 1 | FFYPLDFTFVCPTECSVSHLAWINTPREGGIGLVIEKEGIAFRG |
| 806 | 0        | 34558282   | ref | NP_908097.1    | ALKYL-HYDROPEROXIDE REDUCTASE SUBUNIT                     | Wolmetia succinogenes DSM 1740                        |  |  | group 1 | VLGFFYPLDFTFVCPSEVSVHFAWKNTFAVEGGIGESVALRG   |
|     |          | 34484001   | emb | CAE10397.1     | ALKYL-HYDROPEROXIDE REDUCTASE SUBUNIT                     | Wolmetia succinogenes                                 |  |  |         |                                              |
| 807 | 0        | 29854995   | ref | NP_820667.1    | antioxidant, AhpC/Tsa family                              | Coxiella burnetii RSA 493                             |  |  | group 1 | VLVFFYPLDFTFVCPSEVSIHNAWRNITPVKGGIGAGVALRG   |
|     |          | 154707374  | ref | YP_001423722.1 | antioxidant, AhpC/Tsa family                              | Coxiella burnetii Duway 5J108-111                     |  |  |         |                                              |
|     |          | 16183147   | ref | YP_001597528.1 | antioxidant, AhpC/Tsa family                              | Coxiella burnetii RSA 331                             |  |  |         |                                              |
|     |          | 29542264   | gb  | AAO91201.1     | antioxidant, AhpC/Tsa family                              | Coxiella burnetii RSA 493                             |  |  |         |                                              |
|     |          | 154356600  | gb  | ABS78062.1     | antioxidant, AhpC/Tsa family                              | Coxiella burnetii Duway 5J108-111                     |  |  |         |                                              |
|     |          | 161763284  | gb  | ABX78926.1     | antioxidant, AhpC/Tsa family                              | Coxiella burnetii RSA 331                             |  |  |         |                                              |
| 808 | 0        | 148226827  | ref | NP_001089616.1 | hypothetical protein LOC734674                            | Xenopus laevis                                        |  |  | group 1 | FFYPLDFTFVCPTEVSVCHLAWINTPRNGGLGVLLAGIALRG   |
|     |          | 71051182   | gb  | AAH99274.1     | MGC116486 protein                                         | Xenopus laevis                                        |  |  |         |                                              |
| 809 | 0        | 160872545  | ref | ZP_02062677.1  | peroxiredoxin-2                                           | Rickettsiella grylli                                  |  |  | group 3 | VDITFWPKDFTFVCPTEVLLVHRAWRQYNDAGVAQRANGGLC   |
|     |          | 159121344  | gb  | EDP46682.1     | peroxiredoxin-2                                           | Rickettsiella grylli                                  |  |  |         |                                              |
| 810 | 0        | 6754976    | ref | NP_035164.1    | peroxiredoxin 1                                           | Mus musculus                                          |  |  | group 1 | FFYPLDFTFVCPTEVDSCHLAWINTPKQGGIGLVIEKGISFRG  |
|     |          | 547923     | sp  | P33700         | PRDX1_MOUSE Peroxiredoxin-1 (Thioredoxin peroxid          | Mus musculus                                          |  |  |         |                                              |
|     |          | 303690     | dbj | BAA03713.1     | MSP23                                                     | Mus musculus                                          |  |  |         |                                              |
|     |          | 666970     | dbj | BAA04796.1     | OSF-3                                                     | Mus musculus                                          |  |  |         |                                              |
|     |          | 5566114    | gb  | AAAD45323.1    | peroxiredoxin 1                                           | Mus musculus                                          |  |  |         |                                              |
|     |          | 6467221    | dbj | BAA86992.1     | type I peroxiredoxin                                      | Mus musculus                                          |  |  |         |                                              |
|     |          | 12832161   | dbj | BAB21990.1     | unnamed protein product                                   | Mus musculus                                          |  |  |         |                                              |
|     |          | 12843072   | dbj | BAB25847.1     | unnamed protein product                                   | Mus musculus                                          |  |  |         |                                              |
|     |          | 26350375   | dbj | BAC38827.1     | unnamed protein product                                   | Mus musculus                                          |  |  |         |                                              |

|               |                |                                                          |                                                   |  |  |  |         |  |                                             |
|---------------|----------------|----------------------------------------------------------|---------------------------------------------------|--|--|--|---------|--|---------------------------------------------|
| 54035546.gb   | AAH83348.1     | Peroxiredoxin 1                                          | Mus musculus                                      |  |  |  |         |  | VMLKFLPAAFSFVCPTECSVALWHWQNVPRYGGLEGISIRG   |
| 56103807.gb   | AAH86648.1     | Peroxiredoxin 1                                          | Mus musculus                                      |  |  |  |         |  | FFYPDLDFVYCPTEVLGSHLAWIQISREGGLGISTAGVALRG  |
| 74139592.dbl  | BAE40933.1     | unnamed protein product                                  | Mus musculus                                      |  |  |  |         |  | VFPADFTFVCPTEVSTTHKAWHDTSDVLEGLALRGONGIG    |
| 74178146.dbl  | BAE29960.1     | unnamed protein product                                  | Mus musculus                                      |  |  |  |         |  | VSLFFYPMDFTFVCPTEVSHLAWNTPIEGGVLIEGVLRG     |
| 74191698.dbl  | BAE30417.1     | unnamed protein product                                  | Mus musculus                                      |  |  |  |         |  | FFYPKDFTYVCPTECSVTHSRWLAVERAGGIQGSVALRAVLD  |
| 74198383.dbl  | BAE39676.1     | unnamed protein product                                  | Mus musculus                                      |  |  |  |         |  | FFYPDLDFVCPTEVSTHAWNTPIEGGLVLEKGVAYRG       |
| 74203142.dbl  | BAE26255.1     | unnamed protein product                                  | Mus musculus                                      |  |  |  |         |  | VLFFYPLDFVCPSEVSHSHAWRNTAIDGGIGAGVAFRG      |
| 148898647.gb  | EDL30594.1     | mCG-19655                                                | Mus musculus                                      |  |  |  |         |  | VLVFFYPLDFVCPSEVSHSHAWRNTAIDGGIGAGVAFRG     |
| 160704211.gb  | EAT178855.2    | hypothetical protein SNOG_13831                          | Phaeosphaeria nodorum SNT15                       |  |  |  | group 1 |  | FFYPDLDFVCPTECSVTHLAWNTPIEGGVLGQGHTRLRGLR   |
| 33863026.ref  | NP_894586.1    | thioredoxin peroxidase                                   | Prochlorococcus marinus str. MIT 9313             |  |  |  | group 1 |  | PGFTAKAFYPLDFVCPTECHLAWNTPRHGGIGISTVLR      |
| 33634943.emb  | CAE20929.1     | thioredoxin peroxidase                                   | Prochlorococcus marinus str. MIT 9313             |  |  |  | group 4 |  | SVLPATKSLFFPLDFTFVCPTEVLGVSVFVGGGQIALRG     |
| 118035274.ref | EP_01506882.1  | alkyl hydroperoxide reductase/Thiol specific antioxidant | Burkholderia phytofirmans PsJN                    |  |  |  | group 1 |  | VTKLFYPLDFTFVCPTEISVSHYQWRKTSVYNGGIGDSIALRA |
| EA0707827.gb  | EA0707827.1    | alkyl hydroperoxide reductase/Thiol specific antioxidant | Burkholderia phytofirmans PsJN                    |  |  |  | group 2 |  | MLGIGSAFFYPKDFTFVCPTEVLGVKLAWRDRHDKGGAYRY   |
| 116873036.ref | YP_849817.1    | peroxiredoxin, putative                                  | Listeria welshimeri serovar 6b str. SLC5334       |  |  |  | group 1 |  | FFYPADFTFVCPTEVSTTHKAWHDTSDVLEGLALRGONGIG   |
| 116741914.emb | CAK21038.1     | unnamed protein product                                  | Listeria welshimeri serovar 6b str. SLC5334       |  |  |  | group 1 |  | PGFTAKAFYPLDFVCPTECHLAWNTPRHGGIGISTVLR      |
| 158335068.ref | NP_297285.1    | antioxidant, AhpC/T sa family                            | Chlamydia muridarum Nigg                          |  |  |  | group 1 |  | SVLPATKSLFFPLDFTFVCPTEVLGVSVFVGGGQIALRG     |
| 8163341.gb    | AAF73613.1     | antioxidant, AhpC/T sa family                            | Chlamydia muridarum Nigg                          |  |  |  | group 1 |  | VTKLFYPLDFTFVCPTEISVSHYQWRKTSVYNGGIGDSIALRA |
| 12837636.dbl  | BAE23893.1     | unnamed protein product                                  | Mus musculus                                      |  |  |  | group 1 |  | MLGIGSAFFYPKDFTFVCPTEVLGVKLAWRDRHDKGGAYRY   |
| 151938862.dbl | EDN67696.1     | antioxidant, AhpC/TSA family                             | Vibrio sp. Ex25                                   |  |  |  | group 1 |  | FFYPADFTFVCPTEVSTTHKAWHDTSDVLEGLALRGONGIG   |
| 163802450.ref | ZP_02196343.1  | antioxidant, AhpC/T sa family protein                    | Vibrio campbellii AND4                            |  |  |  | group 1 |  | FFYPDLDFVCPTECSVTHLAWNTPIEGGVLGQGHTRLRGLR   |
| 159173751.gb  | EDP98966.1     | antioxidant, AhpC/T sa family protein                    | Vibrio campbellii AND4                            |  |  |  | group 1 |  | PGFTAKAFYPLDFVCPTECHLAWNTPRHGGIGISTVLR      |
| 148228847.ref | NP_001082894   | hypothetical protein LOC570477                           | Danio rerio                                       |  |  |  | group 1 |  | SVLPATKSLFFPLDFTFVCPTEVLGVSVFVGGGQIALRG     |
| 126631647.gb  | AA134157.1     | hypothetical protein LOC570477                           | Danio rerio                                       |  |  |  | group 1 |  | VTKLFYPLDFTFVCPTEISVSHYQWRKTSVYNGGIGDSIALRA |
| 24947472.sp   | Q91191         | TDX_ONCMY Peroxiredoxin (Thioredoxin peroxidase)         | Oncorhynchus mykiss                               |  |  |  | group 1 |  | MLGIGSAFFYPKDFTFVCPTEVLGVKLAWRDRHDKGGAYRY   |
| 8612111.gb    | AAA91319.1     | RBT_NKEF                                                 | Oncorhynchus mykiss                               |  |  |  | group 1 |  | FFYPADFTFVCPTEVSTTHKAWHDTSDVLEGLALRGONGIG   |
| 6002472.gb    | AAF06001.1     | AF052202_1 2Cys-peroxiredoxin precursor                  | Brassica rapa                                     |  |  |  | group 1 |  | PGFTAKAFYPLDFVCPTECHLAWNTPRHGGIGISTVLR      |
| 58584824.ref  | YP_198397.1    | Peroxiredoxin                                            | Wobachia endosymbiont strain TRS of Bruglia malay |  |  |  | group 1 |  | SVLPATKSLFFPLDFTFVCPTEVLGVSVFVGGGQIALRG     |
| 58411910.gb   | AAW71155.1     | Peroxiredoxin                                            | Wobachia endosymbiont strain TRS of Bruglia malay |  |  |  | group 1 |  | VTKLFYPLDFTFVCPTEISVSHYQWRKTSVYNGGIGDSIALRA |
| 17988922.ref  | NP_541555.1    | ALKYL HYDROPEROXIDE REDUCTASE C22 PRO                    | Brucella melitensis 16M                           |  |  |  | group 3 |  | MLGIGSAFFYPKDFTFVCPTEVLGVKLAWRDRHDKGGAYRY   |
| 17984753.gb   | AA153819.1     | ALKYL HYDROPEROXIDE REDUCTASE C22 PRO                    | Brucella melitensis 16M                           |  |  |  | group 2 |  | FFYPADFTFVCPTEVSTTHKAWHDTSDVLEGLALRGONGIG   |
| 119859162.ref | ZP_016379596.1 | alkyl hydroperoxide reductase/Thiol specific antioxidant | Pseudomonas putida W619                           |  |  |  | group 2 |  | PGFTAKAFYPLDFVCPTECHLAWNTPRHGGIGISTVLR      |
| 119817799.gb  | EAX20541.1     | alkyl hydroperoxide reductase/Thiol specific antioxidant | Pseudomonas putida W619                           |  |  |  | group 2 |  | SVLPATKSLFFPLDFTFVCPTEVLGVSVFVGGGQIALRG     |
| 29829774.ref  | NP_824408.1    | alkyl hydroperoxide reductase                            | Streptomyces avermiltis MA-4680                   |  |  |  | group 3 |  | VTKLFYPLDFTFVCPTEISVSHYQWRKTSVYNGGIGDSIALRA |
| 29606883.dbl  | BAC70943.1     | putative alkyl hydroperoxide reductase                   | Streptomyces avermiltis MA-4680                   |  |  |  | group 3 |  | MLGIGSAFFYPKDFTFVCPTEVLGVKLAWRDRHDKGGAYRY   |
| 146329403.ref | YP_001209073   | alkyl hydroperoxide reductase C22 subunit                | Dichelobacter nodosus VCS1703A                    |  |  |  | group 2 |  | FFYPADFTFVCPTEVSTTHKAWHDTSDVLEGLALRGONGIG   |
| 146232873.gb  | ABQ13851.1     | alkyl hydroperoxide reductase C22 subunit                | Dichelobacter nodosus VCS1703A                    |  |  |  | group 2 |  | PGFTAKAFYPLDFVCPTECHLAWNTPRHGGIGISTVLR      |
| 306925411.gb  | AAF33385.1     | thioredoxin peroxidase                                   | Spironucleus barthanus                            |  |  |  | group 1 |  | SVLPATKSLFFPLDFTFVCPTEVLGVSVFVGGGQIALRG     |
| 165898499.gb  | EDR23903.1     | hypothetical protein, conserved                          | Entamoeba dispar SAW760                           |  |  |  | group 1 |  | VTKLFYPLDFTFVCPTEISVSHYQWRKTSVYNGGIGDSIALRA |
| 156100549.ref | XP_001616002.1 | 2-Cys peroxiredoxin, putative                            | Entamoeba dispar SAW760                           |  |  |  | group 1 |  | MLGIGSAFFYPKDFTFVCPTEVLGVKLAWRDRHDKGGAYRY   |
| 148804876.gb  | EDL46275.1     | 2-Cys peroxiredoxin, putative                            | Plasmodium vivax                                  |  |  |  | group 1 |  | FFYPADFTFVCPTEVSTTHKAWHDTSDVLEGLALRGONGIG   |
| 127511726.gb  | YP_001092923   | alkyl hydroperoxide reductase/Thiol specific antioxidant | Shewanella ichtica PV-4                           |  |  |  | group 2 |  | PGFTAKAFYPLDFVCPTECHLAWNTPRHGGIGISTVLR      |
| 126637021.gb  | ABO22664.1     | alkyl hydroperoxide reductase/Thiol specific antioxidant | Shewanella ichtica PV-4                           |  |  |  | group 2 |  | SVLPATKSLFFPLDFTFVCPTEVLGVSVFVGGGQIALRG     |
| 62183806.gb   | AAK73294.1     | mitochondrial peroxiredoxin                              | Leishmania donovani                               |  |  |  | group 1 |  | VTKLFYPLDFTFVCPTEISVSHYQWRKTSVYNGGIGDSIALRA |
| 26987820.ref  | NP_743245.1    | antioxidant, AhpC/T sa family                            | Pseudomonas putida KT2440                         |  |  |  | group 1 |  | MLGIGSAFFYPKDFTFVCPTEVLGVKLAWRDRHDKGGAYRY   |
| 148546368.ref | YP_001266470.1 | alkyl hydroperoxide reductase/Thiol specific antioxidant | Pseudomonas putida KT2440                         |  |  |  | group 1 |  | FFYPADFTFVCPTEVSTTHKAWHDTSDVLEGLALRGONGIG   |
| 24982519.gb   | AAH66708.1     | AE016299_5 antioxidant, AhpC/T sa family                 | Pseudomonas putida KT2440                         |  |  |  | group 1 |  | PGFTAKAFYPLDFVCPTECHLAWNTPRHGGIGISTVLR      |
| 148510428.gb  | ABQ17286.1     | alkyl hydroperoxide reductase/Thiol specific antioxidant | Pseudomonas putida F1                             |  |  |  | group 1 |  | SVLPATKSLFFPLDFTFVCPTEVLGVSVFVGGGQIALRG     |
| 66773956.sp   | Q3E947         | PRDX1_BOVIN Peroxiredoxin-1                              | Bos taurus                                        |  |  |  | group 1 |  | VTKLFYPLDFTFVCPTEISVSHYQWRKTSVYNGGIGDSIALRA |
| 59858511.gb   | AAOX09090.1    | peroxiredoxin 1                                          | Bos taurus                                        |  |  |  | group 1 |  | MLGIGSAFFYPKDFTFVCPTEVLGVKLAWRDRHDKGGAYRY   |
| 151563396.gb  | AA148010.1     | Peroxiredoxin 1                                          | Bos taurus                                        |  |  |  | group 1 |  | FFYPADFTFVCPTEVSTTHKAWHDTSDVLEGLALRGONGIG   |
| 52080021.ref  | YP_078812.1    | Alkyl hydroperoxide reductase                            | Bacillus licheniformis ATCC 14580                 |  |  |  | group 1 |  | PGFTAKAFYPLDFVCPTECHLAWNTPRHGGIGISTVLR      |
| 52785356.ref  | YP_091225.1    | YkuU                                                     | Bacillus licheniformis ATCC 14580                 |  |  |  | group 1 |  | SVLPATKSLFFPLDFTFVCPTEVLGVSVFVGGGQIALRG     |
| 52003232.gb   | AAU23174.1     | Alkyl hydroperoxide reductase                            | Bacillus licheniformis ATCC 14880                 |  |  |  | group 1 |  | VTKLFYPLDFTFVCPTEISVSHYQWRKTSVYNGGIGDSIALRA |
| 52347898.gb   | AAU40532.1     | YkuU                                                     | Bacillus licheniformis DSM 13                     |  |  |  | group 2 |  | MLGIGSAFFYPKDFTFVCPTEVLGVKLAWRDRHDKGGAYRY   |
| 160884092.ref | ZP_02065095.1  | hypothetical protein BACOVA_02068                        | Bacteroides ovatus ATCC 8483                      |  |  |  | group 2 |  | FFYPADFTFVCPTEVSTTHKAWHDTSDVLEGLALRGONGIG   |
| 156110434.gb  | EDO12179.1     | hypothetical protein BACOVA_02068                        | Bacteroides ovatus ATCC 8483                      |  |  |  | group 2 |  | PGFTAKAFYPLDFVCPTECHLAWNTPRHGGIGISTVLR      |
| 145898431.dbl | BAE57010.1     | peroxiredoxin                                            | Entamoeba nuttallii                               |  |  |  | group 1 |  | SVLPATKSLFFPLDFTFVCPTEVLGVSVFVGGGQIALRG     |
| 149453537.ref | XP_001518434   | PREDICTED: hypothetical protein                          | Omithorhynchus anatinus                           |  |  |  | group 1 |  | VTKLFYPLDFTFVCPTEISVSHYQWRKTSVYNGGIGDSIALRA |
| 165894867.gb  | EDR22704.1     | hypothetical protein, conserved                          | Entamoeba dispar SAW760                           |  |  |  | group 1 |  | MLGIGSAFFYPKDFTFVCPTEVLGVKLAWRDRHDKGGAYRY   |
| 58176947.tuul | TUUL           | A Chain A, Tryparedoxin Peroxidase (Txpx) From Tr        | Trypanosoma cruzi                                 |  |  |  | group 1 |  | FFYPADFTFVCPTEVSTTHKAWHDTSDVLEGLALRGONGIG   |
| 58176948.pdb  | TUUL           | B Chain B, Tryparedoxin Peroxidase (Txpx) From Tr        | Trypanosoma cruzi                                 |  |  |  | group 1 |  | PGFTAKAFYPLDFVCPTECHLAWNTPRHGGIGISTVLR      |
| 58176949.pdb  | TUUL           | C Chain C, Tryparedoxin Peroxidase (Txpx) From Tr        | Trypanosoma cruzi                                 |  |  |  | group 1 |  | SVLPATKSLFFPLDFTFVCPTEVLGVSVFVGGGQIALRG     |
| 58176950.pdb  | TUUL           | D Chain D, Tryparedoxin Peroxidase (Txpx) From Tr        | Trypanosoma cruzi                                 |  |  |  | group 1 |  | VTKLFYPLDFTFVCPTEISVSHYQWRKTSVYNGGIGDSIALRA |
| 58176951.pdb  | TUUL           | E Chain E, Tryparedoxin Peroxidase (Txpx) From Tr        | Trypanosoma cruzi                                 |  |  |  | group 1 |  | MLGIGSAFFYPKDFTFVCPTEVLGVKLAWRDRHDKGGAYRY   |
| 58176952.pdb  | TUUL           | F Chain F, Tryparedoxin Peroxidase (Txpx) From Tr        | Trypanosoma cruzi                                 |  |  |  | group 1 |  | FFYPADFTFVCPTEVSTTHKAWHDTSDVLEGLALRGONGIG   |
| 58176953.pdb  | TUUL           | G Chain G, Tryparedoxin Peroxidase (Txpx) From Tr        | Trypanosoma cruzi                                 |  |  |  | group 1 |  | PGFTAKAFYPLDFVCPTECHLAWNTPRHGGIGISTVLR      |
| 58176954.pdb  | TUUL           | H Chain H, Tryparedoxin Peroxidase (Txpx) From Tr        | Trypanosoma cruzi                                 |  |  |  | group 1 |  | SVLPATKSLFFPLDFTFVCPTEVLGVSVFVGGGQIALRG     |
| 58176955.pdb  | TUUL           | I Chain I, Tryparedoxin Peroxidase (Txpx) From Tr        | Trypanosoma cruzi                                 |  |  |  | group 1 |  | VTKLFYPLDFTFVCPTEISVSHYQWRKTSVYNGGIGDSIALRA |
| 58176956.pdb  | TUUL           | J Chain J, Tryparedoxin Peroxidase (Txpx) From Tr        | Trypanosoma cruzi                                 |  |  |  | group 1 |  | MLGIGSAFFYPKDFTFVCPTEVLGVKLAWRDRHDKGGAYRY   |

|     |          |             |     |                |                                                             |                                                   |  |         |                                              |
|-----|----------|-------------|-----|----------------|-------------------------------------------------------------|---------------------------------------------------|--|---------|----------------------------------------------|
| 840 | 0        | 540257.59   | ref | YP_120001.1    | putative alkylhydroperoxide reductase                       | Nocardia farcinica IFM 10152                      |  | group 3 | LLTIGFVWPKDFTVFCPTTEVLGVHFQWRAHQHEDGVADRAVSV |
| 841 | 0        | 540172.67   | dbi | BAD58637.1     | putative alkylhydroperoxide reductase                       | Nocardia farcinica IFM 10152                      |  | group 2 | FFYPADFTVFCPTTEVTVYKAWHDAISEVLSGMAVREGEKIK   |
| 842 | 0        | 1603886.43  | ref | ZP_020696.46.1 | hypothetical protein BACUNJ1_01060                          | Bacteroides uniformis ATCC 8492                   |  | group 3 | YFYPKDFTFVCPTEFNGDFAVLGVKLAWRREHKAGVALRAVSV  |
| 843 | 6.22E-12 | 16071013.38 | gb  | EAT191.829.2   | alkyl hydroperoxide reductase/Thiol specific antioxidant    | Raistonia metallidurans CH34                      |  | group 1 | GFYPMWTFVCPTESSLAWTMASRDGGLGDIVLUEGIALRG     |
| 844 | 0        | 191501.69   | emb | CAD796.28.1    | alkyl hydroperoxide reductase/Thiol specific antioxidant    | Phaeosphaeria nodorum SNI15                       |  | group 1 | GFMPKDFTEVCPTEVSHVFAWIKNTPKVGGGEALRGNMK      |
| 845 | 0        | 102812.61   | gb  | AAAG15807.1    | AF301002_1 thiorodoxin peroxidase 1                         | Schistosoma mansoni                               |  | group 1 | VLLFFYPADFTVFCPTTEVSTSHLAWNDLDRSGGLGDGNVAFRG |
| 846 | 0        | 15788592    | emb | CAP094.11.1    | novel protein similar to vertebrate peroxidoredoxin 3 (PR3) | Danio rerio                                       |  | group 1 | VLSFFYPLDFTVCPTEVSVTHLAWNTIPRSGGLGFGIALRL    |
| 847 | 0        | 1108352.92  | gb  | CAL17879.1     | alkyl hydroperoxide reductase, C subunit                    | Alcanivorax borkumensis SK2                       |  | group 2 | FFYPADFTVFCPTTEVSTHKAWHDTSDQGLADRAEAGVGVGK   |
| 848 | 1.61E-18 | 537163.07   | ref | YP_106343.1    | alkyl hydroperoxide reductase, subunit c                    | Burkholderia mallei ATCC 23344                    |  | group 2 | VYFYPADFTVFCPTTEVSTHKAWHDTSDVLLIEGLALRGGEIK  |
|     |          | 676427.89   | ref | ZP_00441544.1  | COG0450: Peroxiredoxin                                      | Burkholderia mallei G88 horse 4                   |  |         |                                              |
|     |          | 836205.69   | ref | ZP_00930987.1  | COG0450: Peroxiredoxin                                      | Burkholderia mallei FMH                           |  |         |                                              |
|     |          | 836249.00   | ref | ZP_00935140.1  | COG0450: Peroxiredoxin                                      | Burkholderia mallei JHU                           |  |         |                                              |
|     |          | 1002659.13  | ref | ZP_01340351.1  | hypothetical protein Bmal2_03001850                         | Burkholderia mallei 200272.1280                   |  |         |                                              |
|     |          | 1009171.75  | ref | ZP_01345654.1  | hypothetical protein Bmal10_03001395                        | Burkholderia mallei 10399                         |  |         |                                              |
|     |          | 1215965.05  | ref | YP_990383.1    | alkyl hydroperoxide reductase, subunit C                    | Burkholderia mallei SAVP1                         |  |         |                                              |
|     |          | 12438178.40 | ref | YP_001024879.1 | alkyl hydroperoxide reductase, subunit C                    | Burkholderia mallei NCTC 10229                    |  |         |                                              |
|     |          | 126445589   | ref | YP_001079221.1 | alkyl hydroperoxide reductase, subunit C                    | Burkholderia mallei NCTC 10247                    |  |         |                                              |
|     |          | 524222.77   | gb  | AAU45847.1     | alkyl hydroperoxide reductase, subunit C                    | Burkholderia mallei ATCC 23344                    |  |         |                                              |
|     |          | 1212243.03  | gb  | ABM47834.1     | alkyl hydroperoxide reductase, subunit C                    | Burkholderia mallei SAVP1                         |  |         |                                              |
|     |          | 12423898.60 | gb  | ABM69129.1     | alkyl hydroperoxide reductase, subunit C                    | Burkholderia mallei NCTC 10229                    |  |         |                                              |
|     |          | 12623844.43 | gb  | ABO01655.1     | alkyl hydroperoxide reductase, subunit C                    | Burkholderia mallei NCTC 10247                    |  |         |                                              |
|     |          | 14774556.64 | gb  | EDK62643.1     | Burkholderia mallei FMH                                     | Burkholderia mallei FMH                           |  |         |                                              |
|     |          | 14775479.91 | gb  | EDK61855.1     | alkyl hydroperoxide reductase, subunit C                    | Burkholderia mallei JHU                           |  |         |                                              |
|     |          | 14802499.99 | gb  | EDK63168.1     | alkyl hydroperoxide reductase, subunit C                    | Burkholderia mallei 200272.1280                   |  |         |                                              |
|     |          | 1606970.60  | gb  | EDP870.30.1    | alkyl hydroperoxide reductase, subunit C                    | Burkholderia mallei ATCC 10399                    |  |         |                                              |
| 849 | 0        | 890946.80   | ref | ZP_01167616.1  | antioxidant, AhpC/Prx1 sa family protein                    | Oceanospirillum sp. MED92                         |  | group 1 | VLVFFYPLDFTVFCPSEVSHNAWRNTPVGGIGGGVAFRG      |
|     |          | 890810.26   | gb  | EA806262.1     | antioxidant, AhpC/Prx1 sa family protein                    | Oceanospirillum sp. MED92                         |  |         |                                              |
| 850 | 4.36E-15 | 443306.65   | dbi | BAA20964.1     | antigen                                                     | Entamoeba histolytica                             |  | group 1 | LFYPLDWTFCPTTEQLKVSCHQAWCEADKGGVGTGYSRRG     |
| 851 | 0        | 14919157.9  | ref | ZP_01869825.1  | antioxidant, AhpC/Prx1 sa family protein                    | Vibrio shilonii AK1                               |  | group 1 | VLVFFYPLDFTVFCPSEVSHNAWRNTAIDGGIGAGVAFRG     |
|     |          | 1488345.97  | gb  | EDL51586.1     | antioxidant, AhpC/Prx1 sa family protein                    | Vibrio shilonii AK1                               |  |         |                                              |
| 852 | 1.21E-13 | 572390.76   | ref | YP_180212.1    | putative peroxiredoxin                                      | Ehlichia ruminantium str. Weigelvonden            |  | group 1 | NLKVYPRDFTVFCPTTEIETSTCHSHWRNISKGGIDNSIALRA  |
|     |          | 565790.19   | ref | YP_197231.1    | Probable peroxiredoxin (26 kDa antigen)                     | Ehlichia ruminantium str. Weigelvonden            |  |         |                                              |
|     |          | 586170.78   | ref | YP_196277.1    | Probable peroxiredoxin (26 kDa antigen)                     | Ehlichia ruminantium str. Gardel                  |  |         |                                              |
|     |          | 571611.55   | emb | CALH68068.1    | putative peroxiredoxin                                      | Ehlichia ruminantium str. Weigelvonden            |  |         |                                              |
|     |          | 584166.90   | emb | CAL27803.1     | Probable peroxiredoxin (26 kDa antigen)                     | Ehlichia ruminantium str. Gardel                  |  |         |                                              |
|     |          | 584176.45   | emb | CAL26849.1     | Probable peroxiredoxin (26 kDa antigen)                     | Ehlichia ruminantium str. Weigelvonden            |  |         |                                              |
| 853 | 0        | 54535.49    | ref | NP_006397.1    | thioredoxin peroxidase                                      | Homo sapiens                                      |  | group 1 | VSVELKFFYPLDFTVFCPTTEHLAWINTPRQGLGSGHTLRG    |
|     |          | 30247271    | sp  | Q13162         | PRDX4_HUMAN Peroxiredoxin-4 (Prx-IV) (Thioredoxin)          | Homo sapiens                                      |  |         |                                              |
|     |          | 793811      | gb  | AA895175.1     | antioxidant enzyme AOE37-2                                  | Homo sapiens                                      |  |         |                                              |
|     |          | 131776.46   | gb  | AAH03609.1     | Peroxiredoxin 4                                             | Homo sapiens                                      |  |         |                                              |
|     |          | 139379.85   | gb  | AAH07107.1     | Peroxiredoxin 4                                             | Homo sapiens                                      |  |         |                                              |
|     |          | 168769.97   | gb  | AAH16770.1     | Peroxiredoxin 4                                             | Homo sapiens                                      |  |         |                                              |
|     |          | 494563.71   | emb | CAG46506.1     | PRDX4                                                       | Homo sapiens                                      |  |         |                                              |
|     |          | 1196194.02  | gb  | EAW98996.1     | peroxiredoxin 4                                             | Homo sapiens                                      |  |         |                                              |
|     |          | 1239967.03  | gb  | ABM85953.1     | peroxiredoxin 4                                             | Homo sapiens                                      |  |         |                                              |
| 854 | 0        | 608302.47   | gb  | AA336919.1     | peroxiredoxin 2                                             | synthetic construct                               |  | group 1 | FFYPLDFTVFCPTTEVSHLAWINTPRQGLGVLKEGIAYRG     |
| 855 | 0        | 181525.31   | emb | CAD20737.1     | thioredoxin peroxidase                                      | Ostertagia ostertagi                              |  | group 1 | IDVFFYPLDFTVFCPTTESHLAWINTPRMGGLGVLKEGIAYRG  |
| 856 | 0        | 1609423.40  | ref | ZP_020896.48.1 | hypothetical protein CLOBOL_07225                           | Clostridium botteae ATCC BAA-613                  |  | outlier | FFYPMDFTFVCPTEVSTHQAWIRNGLGVVALRSLKNTWITG    |
|     |          | 1584347.04  | gb  | EDP12477.1     | hypothetical protein CLOBOL_07225                           | Clostridium botteae ATCC BAA-613                  |  |         |                                              |
| 857 | 2.00E-20 | 15610311.11 | ref | XP_001617294.8 | thioredoxin peroxidase2, putative                           | Plasmodium vivax Sal-1                            |  | group 1 | VTKLYPLNYTFVCPTEISVSHLAWNKMPKIGGINSFALRG     |
|     |          | 1488061.22  | gb  | EDL47521.1     | thioredoxin peroxidase2, putative                           | Plasmodium vivax                                  |  |         |                                              |
| 858 | 0        | 1454114.96  | gb  | ABP68406.1     | mitochondrial tyrosine peroxidase                           | Leishmania donovani                               |  | group 1 | FFYPMDFTFVCPTEVSCSHLAWNIPRKGGLVLAASGIALRG    |
| 859 | 0        | 5089751.33  | gb  | AA185819.1     | putative thioredoxin peroxidase 3                           | Glossina morsitans morsitans                      |  | group 1 | FFYPLDFTVFCPTTEVSHLAWVDRKLGGLVLLGSLRGLRG     |
| 860 | 0        | 74987.30    | pir | gi             | T16005 hypothetical protein F09E5.2 - Caenorhabditis        | Caenorhabditis elegans                            |  | group 1 | VDVFFYPLDFTVFCPTTESHLAWINPRHGGGLGVLKEGIAYRG  |
|     |          | 3804757.1   | gb  | AA809688.1     | similar to Drosophila melanogaster Jafra1                   | Drosophila yakuba                                 |  | group 1 | FFYPLDFTVFCPTTEVSHLAWINTPRQGLGVLDTGIPFRFG    |
|     |          | 7419889.0   | dbi | BAE30667.1     | unnamed protein product                                     | Mus musculus                                      |  | group 1 | FFYPLDFTVFCPTTESHLAWINTPKQGLGVLKEGISFRG      |
| 863 | 1.55E-16 | 1342933.43  | ref | YP_001117079.1 | alkyl hydroperoxide reductase/Thiol specific antioxidant    | Burkholderia vietnamiensis G4                     |  | group 2 | VYFYPADFTVFCPTTEVSTHKAWHDTSEVLLIEGMLRGGDNGIG |
|     |          | 1341385.00  | gb  | AB057614.1     | alkyl hydroperoxide reductase/Thiol specific antioxidant    | Burkholderia vietnamiensis G4                     |  |         |                                              |
|     |          | 660462.06   | ref | YP_236047.1    | alkyl hydroperoxide reductase/Thiol specific antioxidant    | Pseudomonas syringae pv. syringae B728a           |  | group 2 | FFYPMDFTFVCPTEVSTHAAHWNTSPVLIAGLADRGDGGVVG   |
|     |          | 717381.50   | ref | YP_274474.1    | alkyl hydroperoxide reductase, C subunit                    | Pseudomonas syringae pv. phaseolicola 1448A       |  |         |                                              |
|     |          | 632589.13   | gb  | AA338009.1     | alkyl hydroperoxide reductase/Thiol specific antioxidant    | Pseudomonas syringae pv. phaseolicola 1448A       |  |         |                                              |
|     |          | 715887.03   | gb  | AA239141.1     | alkyl hydroperoxide reductase, C subunit                    | Bacillus amyloliquefaciens FZB42                  |  | group 2 | CFYPADEFVFCPTTEVSTVHKGWHDSDSEVLDLTLADRCAGGIG |
| 865 | 5.59E-16 | 1546880.95  | ref | NP_001423256.1 | AhpC                                                        | Bacillus amyloliquefaciens FZB42                  |  | group 2 |                                              |
|     |          | 1543539.46  | gb  | ABS76025.1     | AhpC                                                        | Bacillus amyloliquefaciens FZB42                  |  |         |                                              |
| 866 | 0        | 216724.64   | ref | NP_660531.1    | alkyl hydroperoxide reductase subunit C                     | Buchnera aphidicola str. Sg (Schizaphis graminum) |  | group 1 | ILKFFWPMDFTFVCPSEVSHVQAWQNTFPNGGIGLNIJALRA   |

|     |          |           |                    |                                                            |                                                          |         |                                                  |
|-----|----------|-----------|--------------------|------------------------------------------------------------|----------------------------------------------------------|---------|--------------------------------------------------|
|     | 25091461 | sp        | Q8K9W0             | ISAA_BUCAP Probable peroxidoxin (Thioredoxin reductase)    | Buchnera aphidicola str. Sg. (Schizaphis graminum)       |         |                                                  |
| 867 | 21623080 | gb        | AAV67742.1         | alkyl hydroperoxidase subunit C                            | Buchnera aphidicola str. Sg. (Schizaphis graminum)       | group 1 | FFYPLDFTFVCPTECVSVAHLQWLTLOERKGGGLGVLDQGVAYRG    |
| 868 | 0        | 8420888.1 | AAV31766.1         | trypanoxin peroxidase 2                                    | Leishmania guyanensis                                    | group 1 | VLVFFYPLDFTFVCPSEVSVTHYAWRNTFPVKGGIGDHWALRA      |
|     | 0        | 82703502  | YP_4130688.1       | Alkyl hydroperoxidase reductase/Thiol specific antioxidant | Nitrosospora multiformis ATCC 25196                      | group 1 | FFYPLDFTFVCPTECVSVAHLQWLTLOERKGGGLGVLDQGVAYRG    |
| 869 | 0        | 82411567  | NP_488688.1        | Alkyl hydroperoxidase reductase/Thiol specific antioxidant | Nitrosospora multiformis ATCC 25196                      | group 1 | FFYPLDFTFVCPTECVSVAHLQWLTLOERKGGGLGVLDQGVAYRG    |
|     | 0        | 17232133  | NP_488688.1        | Alkyl hydroperoxidase reductase/Thiol specific antioxidant | Nitrosospora multiformis ATCC 25196                      | group 1 | FFYPLDFTFVCPTECVSVAHLQWLTLOERKGGGLGVLDQGVAYRG    |
|     | 0        | 75908245  | YP_322541.1        | Alkyl hydroperoxidase reductase/Thiol specific antioxidant | Anabaena variabilis ATCC 29413                           |         |                                                  |
|     | 0        | 1713378   | dbj BAB76340.1     | peroxidoxin                                                | Nostoc sp. PCC 7120                                      |         |                                                  |
| 870 | 0        | 75701970  | dbj BAB76340.1     | Alkyl hydroperoxidase reductase/Thiol specific antioxidant | Anabaena variabilis ATCC 29413                           | group 1 | LFYPLDFTFVCPTECVSVAHLQWLTLOERKGGGLGVLDQGVAYRG    |
|     | 0        | 28514233  | Q171172            | TDX2 BRUMA Thioredoxin peroxidase 2 (Peroxiredoxin)        | Bruglia malayi                                           |         |                                                  |
|     | 0        | 2347061   | dbj AAB67873.1     | thiol-specific antioxidant protein                         | Bruglia malayi                                           |         |                                                  |
| 871 | 0        | 17738015  | ref NP_524367.1    | Peroxiredoxin 5037 CG5626-PA isoform A                     | Drosophila melanogaster                                  | group 1 | FFYPLDFTFVCPTECVSVAHLQWLTLOERKGGGLGVLDQGVAYRG    |
|     | 0        | 11935114  | dbj AAG41976.1     | AF311742_1 thioredoxin peroxidase 3                        | Drosophila melanogaster                                  |         |                                                  |
|     | 0        | 23171565  | dbj AAAF5443.1.2   | CG5826-PA                                                  | Drosophila melanogaster                                  |         |                                                  |
|     | 0        | 29335975  | dbj AAO74686.1     | SD08737p                                                   | Drosophila melanogaster                                  | group 1 | FFYPLDFTFVCPTECVSVAHLQWLTLOERKGGGLGVLDQGVAYRG    |
| 872 | 0        | 71028056  | ref XP_763671.1    | thioredoxin peroxidase 1                                   | Theileria parva strain Muguga                            | group 1 | FFYPLDFTFVCPTECVSVAHLQWLTLOERKGGGLGVLDQGVAYRG    |
| 873 | 0        | 159137835 | ref AB1988997.1    | 2-Cys peroxidoxin                                          | Theileria parva                                          | group 1 | FFYPLDFTFVCPTECVSVAHLQWLTLOERKGGGLGVLDQGVAYRG    |
| 874 | 0        | 148227074 | ref NP_001085414.1 | MGC83078 protein                                           | Thynnus maccoyii                                         | group 1 | FFYPLDFTFVCPTECVSVAHLQWLTLOERKGGGLGVLDQGVAYRG    |
|     | 0        | 48734656  | dbj AAH72318.1     | MGC83078 protein                                           | Xenopus laevis                                           | group 4 | RSIFFYPKDFTFVCPTECVSVAHLQWLTLOERKGGGLGVLDQGVAYRG |
| 875 | 2.60E-11 | 76789341  | ref YP_328427.1    | thioredoxin peroxidase                                     | Chlamydia trachomatis AHAR-13                            | group 1 | LFYPLDFTFVCPTECVSVAHLQWLTLOERKGGGLGVLDQGVAYRG    |
|     | 0        | 76167871  | dbj AA50879.1      | thioredoxin peroxidase                                     | Chlamydia trachomatis AHAR-13                            | group 1 | LFYPLDFTFVCPTECVSVAHLQWLTLOERKGGGLGVLDQGVAYRG    |
| 876 | 3.86E-14 | 16590527  | dbj EDR30285.1     | hypothetical protein, conserved                            | Entamoeba dispar SAW760                                  | group 1 | NLKFYPLDFTFVCPSEVSVTHLAWKNTFPVKGGIGDHWALRA       |
| 877 | 0        | 83309763  | ref YP_42027.1     | Peroxiredoxin                                              | Magnetospirillum magnetotum AMB-1                        | group 1 | FFYPLDFTFVCPTECVSVAHLQWLTLOERKGGGLGVLDQGVAYRG    |
|     | 0        | 82944604  | dbj BAE46466.1     | Peroxiredoxin                                              | Magnetospirillum magnetotum AMB-1                        | group 1 | FFYPLDFTFVCPTECVSVAHLQWLTLOERKGGGLGVLDQGVAYRG    |
| 878 | 0        | 119113794 | ref XP_310704.3    | thioredoxin-dependent peroxidase (AGAP000396-PA)           | Anopheles gambiae str. PE8T                              | group 1 | FFYPLDFTFVCPTECVSVAHLQWLTLOERKGGGLGVLDQGVAYRG    |
|     | 0        | 116130529 | dbj EAA06406.3     | thioredoxin-dependent peroxidase (AGAP000396-PA)           | Anopheles gambiae str. PE8T                              | group 1 | FFYPLDFTFVCPTECVSVAHLQWLTLOERKGGGLGVLDQGVAYRG    |
| 879 | 0        | 86605254  | ref YP_474017.1    | antioxidant, AhpC/T sa family                              | Synechococcus sp. JA-3-3Ab                               | group 1 | VMAFFYPDFFTFVCPSEVSVHNAMRNVELDGGIGEMAFRGG        |
|     | 0        | 86553796  | dbj ABC98754.1     | antioxidant, AhpC/T sa family                              | Synechococcus sp. JA-3-3Ab                               | group 1 | FFYPLDFTFVCPTECVSVAHLQWLTLOERKGGGLGVLDQGVAYRG    |
| 880 | 2.36E-16 | 27232101  | dbj AAG25678.2     | AF305718_1 peroxidoxin                                     | Toxoplasma gondii                                        | group 1 | FFYPLDFTFVCPTECVSVAHLQWLTLOERKGGGLGVLDQGVAYRG    |
| 881 | 0        | 11968132  | ref NP_071985.1    | peroxidoxin 3                                              | Rattus norvegicus                                        | group 1 | FFYPLDFTFVCPTECVSVAHLQWLTLOERKGGGLGVLDQGVAYRG    |
|     | 0        | 4336877   | dbj AAD17992.1     | PRX-III                                                    | Rattus norvegicus                                        | group 1 | FFYPLDFTFVCPTECVSVAHLQWLTLOERKGGGLGVLDQGVAYRG    |
| 882 | 0        | 77164396  | ref YP_342921.1    | Alkyl hydroperoxidase reductase/Thiol specific antioxidant | Nitrosococcus oceanus ATCC 19707                         | group 1 | VLVFFYPLDFTFVCPSEVSVHNAMRNVELDGGIGEMAFRGG        |
|     | 0        | 76882710  | dbj ABA57391.1     | Alkyl hydroperoxidase reductase/Thiol specific antioxidant | Nitrosococcus oceanus ATCC 19707                         | group 1 | FFYPLDFTFVCPTECVSVAHLQWLTLOERKGGGLGVLDQGVAYRG    |
| 883 | 0        | 56751802  | ref YP_172503.1    | thioredoxin peroxidase                                     | Synechococcus elongatus PCC 6301                         | group 1 | FFYPLDFTFVCPTECVSVAHLQWLTLOERKGGGLGVLDQGVAYRG    |
|     | 0        | 56686761  | dbj BAD79883.1     | thioredoxin peroxidase                                     | Synechococcus elongatus PCC 6301                         | group 1 | FFYPLDFTFVCPTECVSVAHLQWLTLOERKGGGLGVLDQGVAYRG    |
| 884 | 0        | 33519693  | ref NP_878525.1    | alkyl hydroperoxidase reductase C22 protein                | Candidatus Blochmannia floridanus                        | group 1 | NLFFFYPLDFTFVCPSEVSVHNAMRNVELDGGIGEMAFRGG        |
|     | 0        | 33517356  | dbj CAD83741.1     | alkyl hydroperoxidase reductase C22 protein                | Candidatus Blochmannia floridanus                        | group 1 | FFYPLDFTFVCPSEVSVHNAMRNVELDGGIGEMAFRGG           |
| 885 | 0        | 116220204 | ref NP_01485647.1  | hypothetical protein VchoV5_02001759                       | Vibrio cholerae V51                                      | group 1 | FFYPLDFTFVCPSEVSVHNAMRNVELDGGIGEMAFRGG           |
| 886 | 0        | 33594422  | ref NP_882066.1    | alkyl hydroperoxidase reductase                            | Bordetella pertussis Tohama 1                            | group 3 | YFYPKDFTFVCPTEVLLVYKLRWRREHPTGALIAAGVALRAVS      |
|     | 0        | 33597884  | ref NP_885527.1    | alkyl hydroperoxidase reductase                            | Bordetella pertussis Tohama 1                            | group 3 | YFYPKDFTFVCPTEVLLVYKLRWRREHPTGALIAAGVALRAVS      |
|     | 0        | 33602787  | ref NP_890347.1    | alkyl hydroperoxidase reductase                            | Bordetella bronchiseptica RB50                           | group 1 | FFYPLDFTFVCPTECVSVAHLQWLTLOERKGGGLGVLDQGVAYRG    |
|     | 0        | 33564497  | dbj CAE43811.1     | alkyl hydroperoxidase reductase                            | Bordetella pertussis Tohama 1                            | group 1 | FFYPLDFTFVCPTECVSVAHLQWLTLOERKGGGLGVLDQGVAYRG    |
|     | 0        | 33574313  | dbj CAE38646.1     | alkyl hydroperoxidase reductase                            | Bordetella pertussis Tohama 1                            | group 1 | FFYPLDFTFVCPTECVSVAHLQWLTLOERKGGGLGVLDQGVAYRG    |
| 887 | 1.49E-16 | 118594070 | ref ZP_01551417.1  | alkyl hydroperoxidase reductase, subunit C                 | Methylobacterium bacterium HTCC2181                      | group 2 | VFYPADFTFVCPTEVSTTHKAWHDASDVMIAAGLALRGDLGIG      |
|     | 0        | 118439848 | dbj EAV46475.1     | alkyl hydroperoxidase reductase, subunit C                 | Methylobacterium bacterium HTCC2181                      | group 2 | VFYPADFTFVCPTEVSTTHKAWHDASDVMIAAGLALRGDLGIG      |
| 888 | 0        | 161504412 | ref YP_001571524.1 | hypothetical protein SARI_02523                            | Salmonella enterica subsp. arizonae serovar 62:z4:z23:-- | group 1 | VLVFFYPLDFTFVCPSEVSVHNAMRNVELDGGIGEMAFRGG        |
|     | 0        | 160865759 | dbj ABX22382.1     | hypothetical protein SARI_02523                            | Salmonella enterica subsp. arizonae serovar 62:z4:z23:-- | group 1 | VLVFFYPLDFTFVCPSEVSVHNAMRNVELDGGIGEMAFRGG        |
| 889 | 0        | 84569882  | dbj ABC59223.1     | natural killer cell enhancement factor                     | Cyprinus carpio                                          | group 1 | FFYPLDFTFVCPTECVSVAHLQWLTLOERKGGGLGVLDQGVAYRG    |
| 890 | 3.35E-15 | 149194237 | ref ZP_01871334.1  | ALKYL HYDROPEROXIDE REDUCTASE                              | Camibacter medianticus TB-2                              | group 2 | VLKGFYPADFTFVCPTEVSTSHKRFVETEPKLTIAAGLALRG       |
|     | 0        | 149135412 | dbj EDM2389.1.1    | ALKYL HYDROPEROXIDE REDUCTASE                              | Camibacter medianticus TB-2                              | group 2 | FFYPADFTFVCPTEVSTTHKAWHDASDVMIAAGLALRGDLGIG      |
| 891 | 0        | 11973759  | ref YP_926495.1    | alkyl hydroperoxidase reductase, C subunit                 | Shewanella amazonensis SB2B                              | group 1 | FFYPLDFTFVCPTECVSVAHLQWLTLOERKGGGLGVLDQGVAYRG    |
|     | 0        | 11976255  | dbj ABI98825.1     | alkyl hydroperoxidase reductase, C subunit                 | Shewanella amazonensis SB2B                              | group 1 | FFYPLDFTFVCPTECVSVAHLQWLTLOERKGGGLGVLDQGVAYRG    |
| 892 | 0        | 3089370   | dbj AAC15095.1     | trypanoxin peroxidase                                      | Crithidia fasciculata                                    | group 1 | FFYPLDFTFVCPTECVSVAHLQWLTLOERKGGGLGVLDQGVAYRG    |
| 893 | 0        | 34499194  | ref NP_903409.1    | probable peroxidase                                        | Chromobacterium violaceum ATCC 12472                     | group 1 | VLVFFYPLDFTFVCPSEVSVHNAMRNVELDGGIGEMAFRGG        |
|     | 0        | 34105045  | dbj AAO61401.1     | probable peroxidase                                        | Chromobacterium violaceum ATCC 12472                     | group 1 | VLVFFYPLDFTFVCPSEVSVHNAMRNVELDGGIGEMAFRGG        |
| 894 | 0        | 86145571  | ref ZP_01063901.1  | alkyl hydroperoxidase reductase C22 protein                | Vibrio sp. MED222                                        | group 1 | VLVFFYPLDFTFVCPSEVSVHNAMRNVELDGGIGEMAFRGG        |
|     | 0        | 85836542  | dbj EAQ34668.1     | alkyl hydroperoxidase reductase C22 protein                | Vibrio sp. MED222                                        | group 1 | VLVFFYPLDFTFVCPSEVSVHNAMRNVELDGGIGEMAFRGG        |
| 895 | 5.86E-11 | 87306388  | ref ZP_01088535.1  | 2-cys peroxidoxin                                          | Blastopirellula marina DSM 3645                          | outlier | LFYPRODFVCPTEVSTSHKRLQVLTQPPSDGLPNRGLVDKIALG     |
|     | 0        | 87290567  | dbj EAQ32454.1     | 2-cys peroxidoxin                                          | Blastopirellula marina DSM 3645                          | outlier | LFYPRODFVCPTEVSTSHKRLQVLTQPPSDGLPNRGLVDKIALG     |
| 896 | 0        | 145299771 | ref YP_001142612   | alkyl hydroperoxidase reductase subunit C                  | Aeromonas salmonicida subsp. salmonicida A449            | group 1 | VLVFFYPLDFTFVCPSEVSVHNAMRNVELDGGIGEMAFRGG        |
|     | 0        | 142852543 | dbj ABO90864.1     | alkyl hydroperoxidase reductase subunit C                  | Aeromonas salmonicida subsp. salmonicida A449            | group 1 | VLVFFYPLDFTFVCPSEVSVHNAMRNVELDGGIGEMAFRGG        |
| 897 | 0        | 157164012 | ref YP_001466308.1 | 2-cys peroxidoxin BAST1, Thiol-specific antioxidant        | Campylobacter concisus 13826                             | group 1 | VLGFFYPMDFTFVCPSEVSVSHFAWKEITPVKGGIGAGVALRG      |
|     | 0        | 112800854 | dbj EAT98198.1     | antioxidant, AhpC/T sa family                              | Campylobacter concisus 13826                             | group 1 | VLGFFYPMDFTFVCPSEVSVSHFAWKEITPVKGGIGAGVALRG      |
| 898 | 0        | 87119426  | ref ZP_01075323.1  | antioxidant, AhpC/T sa family protein                      | Marinomonas sp. MED121                                   | group 1 | VLAFYPLDFTFVCPSEVSVHNAMRNVELDGGIGEMAFRGG         |
|     | 0        | 86164902  | dbj EAQ6670.1      | antioxidant, AhpC/T sa family protein                      | Marinomonas sp. MED121                                   | group 1 | VLAFYPLDFTFVCPSEVSVHNAMRNVELDGGIGEMAFRGG         |
| 899 | 0        | 158010320 | ref NP_266332.1    | alkyl hydroperoxidase reductase subunit C                  | Escherichia coli O157:HT EDL933                          | group 2 | FFYPADFTFVCPTEVSTTHKAWHDASDVMIAAGLALRGDLGIG      |
|     | 0        | 15828958  | ref NP_308671.1    | alkyl hydroperoxidase reductase subunit C                  | Escherichia coli O157:HT str. Sakai                      | group 2 | FFYPADFTFVCPTEVSTTHKAWHDASDVMIAAGLALRGDLGIG      |
|     | 0        | 16128588  | ref NP_415138.1    | alkyl hydroperoxidase reductase, C22 subunit               | Escherichia coli K12                                     |         |                                                  |

|           |           |                |                                                          |                                                                                       |         |  |                                              |
|-----------|-----------|----------------|----------------------------------------------------------|---------------------------------------------------------------------------------------|---------|--|----------------------------------------------|
| 24111953  | ref       | NP_706463.1    | alkyl hydroperoxide reductase subunit C                  | Shigella flexneri 2a str. 301                                                         |         |  |                                              |
| 26246586  | ref       | NP_752625.1    | alkyl hydroperoxide reductase subunit C                  | Escherichia coli CF1073                                                               |         |  |                                              |
| 30062063  | ref       | NP_836234.1    | alkyl hydroperoxide reductase subunit C                  | Shigella flexneri 2a str. 2457T                                                       |         |  |                                              |
| 74311140  | ref       | YP_109859.1    | alkyl hydroperoxide reductase subunit C                  | Shigella sonnei Ssg046                                                                |         |  |                                              |
| 75177480  | ref       | ZP_00697561.1  | COG0450: Peroxiredoxin                                   | Shigella boydii BS512                                                                 |         |  |                                              |
| 75239509  | ref       | ZP_00710898.1  | COG0450: Peroxiredoxin                                   | Escherichia coli B171                                                                 |         |  |                                              |
| 75239588  | ref       | ZP_00716056.1  | COG0450: Peroxiredoxin                                   | Escherichia coli B7A                                                                  |         |  |                                              |
| 75240763  | ref       | ZP_00724670.1  | COG0450: Peroxiredoxin                                   | Escherichia coli F11                                                                  |         |  |                                              |
| 75259657  | ref       | ZP_00730064.1  | COG0450: Peroxiredoxin                                   | Escherichia coli E22                                                                  |         |  |                                              |
| 75514700  | ref       | ZP_00736955.1  | COG0450: Peroxiredoxin                                   | Escherichia coli 53638                                                                |         |  |                                              |
| 82543053  | ref       | YP_407000.1    | alkyl hydroperoxide reductase subunit C                  | Shigella boydii Sb227                                                                 |         |  |                                              |
| 83570434  | ref       | ZP_00921879.1  | COG0450: Peroxiredoxin                                   | Shigella dysenteriae 10/12                                                            |         |  |                                              |
| 83589959  | ref       | ZP_00925589.1  | COG0450: Peroxiredoxin                                   | Escherichia coli 10-1-1                                                               |         |  |                                              |
| 89107473  | ref       | AP_001283.1    | alkyl hydroperoxide reductase, C22 subunit               | Escherichia coli W3110                                                                |         |  |                                              |
| 91209653  | ref       | YP_539639.1    | alkyl hydroperoxide reductase subunit C                  | Escherichia coli UT189                                                                |         |  |                                              |
| 110840837 | ref       | YP_688565.1    | alkyl hydroperoxide reductase subunit C                  | Escherichia coli 536                                                                  |         |  |                                              |
| 110840601 | ref       | YP_688121.1    | alkyl hydroperoxide reductase subunit C                  | Shigella flexneri 5 str. 8401                                                         |         |  |                                              |
| 117622827 | ref       | ZP_851740.1    | alkyl hydroperoxide reductase subunit C                  | Escherichia coli APEC O1                                                              |         |  |                                              |
| 124550194 | ref       | ZP_017700943.1 | alkyl hydroperoxide reductase/Thiol specific antioxidant | Escherichia coli B                                                                    |         |  |                                              |
| 157155096 | ref       | YP_001461769.1 | alkyl hydroperoxide reductase subunit C                  | Escherichia coli E24377A                                                              |         |  |                                              |
| 157160102 | ref       | YP_001457420.1 | alkyl hydroperoxide reductase subunit C                  | Escherichia coli HS                                                                   |         |  |                                              |
| 83286946  | sp        | P0AE08         | AHPC ECOLI Alkyl hydroperoxide reductase subunit C       | Escherichia coli K12                                                                  |         |  |                                              |
| 83286944  | sp        | P0AE10         | AHPC ECOL57 Alkyl hydroperoxide reductase subunit C      | Escherichia coli O157:H7                                                              |         |  |                                              |
| 83286945  | sp        | P0AE09         | AHPC ECOL6 Alkyl hydroperoxide reductase subunit C       | Escherichia coli O6                                                                   |         |  |                                              |
| 83286947  | sp        | P0AE11         | AHPC SHIFL Alkyl hydroperoxide reductase subunit C       | Escherichia coli Shigella flexneri                                                    |         |  |                                              |
| 26108985  | gb        | AAAG54940.1    | AE005240_6 alkyl hydroperoxide reductase, C22 subunit    | Escherichia coli O157:H7 EDL933                                                       |         |  |                                              |
| 216543    | dbi       | BA0A2485.1     | alkyl hydroperoxide reductase C22 protein                | Escherichia coli CF1073                                                               |         |  |                                              |
| 1778523   | dbi       | AA8A0806.1     | alkyl hydroperoxide reductase C22 subunit                | Escherichia coli W3110                                                                |         |  |                                              |
| 178822    | gb        | AAAC73706.1    | alkyl hydroperoxide reductase, C22 subunit               | Escherichia coli K12                                                                  |         |  |                                              |
| 406222    | dbi       | BAA35235.1     | alkyl hydroperoxide reductase, C22 subunit               | Escherichia coli W3110                                                                |         |  |                                              |
| 13360102  | dbi       | BAB34067.1     | alkyl hydroperoxide reductase C22 subunit                | Escherichia coli O157:H7 str. Sakai                                                   |         |  |                                              |
| 24050763  | dbi       | AAAN42170.1    | alkyl hydroperoxide reductase, C22 subunit               | Shigella flexneri 2a str. 301                                                         |         |  |                                              |
| 30040307  | gb        | AAAP16040.1    | alkyl hydroperoxide reductase, C22 subunit               | Shigella flexneri 2a str. 2457T                                                       |         |  |                                              |
| 73854617  | gb        | AA287324.1     | alkyl hydroperoxide reductase, C22 subunit               | Shigella sonnei Ssg046                                                                |         |  |                                              |
| 81244464  | gb        | AB865172.1     | alkyl hydroperoxide reductase, C22 subunit               | Shigella boydii Sb227                                                                 |         |  |                                              |
| 91071227  | gb        | ABE06108.1     | alkyl hydroperoxide reductase, C22 subunit; detoxified   | Escherichia coli UT189                                                                |         |  |                                              |
| 110342429 | gb        | ABG68666.1     | alkyl hydroperoxide reductase C22 protein                | Escherichia coli 536                                                                  |         |  |                                              |
| 110614149 | gb        | ABF02816.1     | alkyl hydroperoxide reductase, C22 subunit, thioredoxin  | Shigella flexneri 5 str. 8401                                                         |         |  |                                              |
| 115511951 | gb        | ABJ00026.1     | alkyl hydroperoxide reductase, C22 subunit               | Escherichia coli APEC O1                                                              |         |  |                                              |
| 124499357 | gb        | EAY46847.1     | alkyl hydroperoxide reductase/Thiol specific antioxidant | Escherichia coli C str. ATCC 8739                                                     |         |  |                                              |
| 157065782 | gb        | ABV05037.1     | alkyl hydroperoxide reductase subunit C                  | Escherichia coli HS                                                                   |         |  |                                              |
| 157077126 | gb        | ABY16834.1     | alkyl hydroperoxide reductase subunit C                  | Escherichia coli E24377A                                                              |         |  |                                              |
| 0         | 82775887  | ref            | YP_402234.1                                              | Shigella dysenteriae Sd197                                                            |         |  |                                              |
| 81240035  | gb        | AB860745.1     | alkyl hydroperoxide reductase, C22 subunit               | Shigella dysenteriae Sd197                                                            |         |  |                                              |
| 16081061  | ref       | NP_091889.1    | alkyl hydroperoxide reductase                            | Bacillus subtilis subsp. subtilis str. 168                                            | group 2 |  | FFYPADFTFVCPTEVSTTHKAWHSSSEEGGLADRAAEGIGVK   |
| 1703216   | sp        | P80239         | AHPC_BAGSU Alkyl hydroperoxide reductase subunit C       | Bacillus subtilis                                                                     | group 2 |  | CFYPADFSVCPTEVSTVHKGWHDSDSEVLDITGLADRGAGGIG  |
| 1064762   | dbi       | BAA11268.1     | alkyl hydroperoxide reductase                            | Bacillus subtilis                                                                     |         |  |                                              |
| 2636556   | emb       | CAB16046.1     | alkyl hydroperoxide reductase (small subunit)            | Bacillus subtilis subsp. subtilis str. 168                                            |         |  |                                              |
| 0         | 149187903 | ref            | ZP_01866199.1                                            | Vibrio shilonii AK1                                                                   | group 2 |  | NTTIKFFYPADFTFVCPTEVSTTHKAWHSDSDOGLADRAVVK   |
| 148838299 | gb        | EDL55240.1     | alkyl hydroperoxide reductase c22 protein                | Vibrio shilonii AK1                                                                   | group 1 |  | VDVFFYPLDFTFVCPSESHYA WCLQGQEGGIGYL VAGIALRG |
| 0         | 159107847 | ref            | XP_001704199.1                                           | giardia lamblia ATCC 50803                                                            | group 1 |  |                                              |
| 157432254 | gb        | EDOF76525.1    | Peroxioredoxin 1                                         | giardia lamblia ATCC 50803                                                            | group 1 |  |                                              |
| 0         | 158593227 | gb             | EDP31822.1                                               | Brugia malayi                                                                         | group 1 |  | FFYPLDFTFVCPTEAFSDRCCSHLAWIQTPREGGLGVLA      |
| 3.96E-17  | 121600300 | ref            | YP_982629.1                                              | Polaromonas naphthalenivorans Cj2                                                     | group 2 |  | VFYPADFTFVCPTEVSTTHKAWHSDTSEVMIAGLAVRGMGIG   |
| 0         | 120594269 | gb             | ABM37708.1                                               | Polaromonas naphthalenivorans Cj2                                                     | group 2 |  | FFYPADFTFVCPTEVSTVHKAWHDASEVSDGMAYRGEKIK     |
| 0         | 53712551  | ref            | YP_098543.1                                              | Bacteroides fragilis YCH46                                                            | group 2 |  |                                              |
| 60680733  | ref       | YP_210877.1    | alkyl hydroperoxide reductase C subunit                  | Bacteroides fragilis NCTC 9343                                                        |         |  |                                              |
| 52215416  | dbi       | BAD48009.1     | alkyl hydroperoxide reductase subunit C                  | Bacteroides fragilis YCH46                                                            |         |  |                                              |
| 60492167  | emb       | CAH06930.1     | alkyl hydroperoxide reductase C subunit                  | Bacteroides fragilis NCTC 9343                                                        |         |  |                                              |
| 3322801   | gb        | AA65497.1      | alkyl hydroperoxide reductase (ahpC)                     | Troponea pallidum subsp. pallidum str. Nichols                                        | group 2 |  | MFYPADFTFVCPTEVSTVHKAWADATDVLTLTWHALRGDMGIG  |
| 0         | 149375684 | ref            | ZP_01893453.1                                            | Marinobacter algicola D5893                                                           | group 2 |  | FFYPADFTFVCPTEVSTTHKAWHSSSEEGGLADRAAEGIGVK   |
| 149360086 | gb        | EDM4864.1      | alkyl hydroperoxide reductase, C subunit                 | Marinobacter algicola D5893                                                           | group 1 |  | FFYPLDFTFVCPTEVSHLAWVQIDRRSGGGLVLIQIALRG     |
| 0         | 115448541 | ref            | NP_001047050.1                                           | Oryza sativa (japonica cultivar-group) precursor (Thiol-specific antioxidant protein) |         |  |                                              |
| 75323389  | sp        | G6ER94         | BAS1_ORYS12-Cys peroxiredoxin BAS1, chloroplast          | Oryza sativa (japonica cultivar-group)                                                |         |  |                                              |
| 50251981  | dbi       | BAD27915.1     | putative thioredoxin peroxidase                          | Oryza sativa (japonica cultivar-group)                                                |         |  |                                              |
| 50252657  | dbi       | BAD28826.1     | putative thioredoxin peroxidase                          | Oryza sativa (japonica cultivar-group)                                                |         |  |                                              |
| 67904930  | emb       | CAUJ1693.1     | 2-Cys peroxiredoxin                                      | Oryza sativa (japonica cultivar-group)                                                |         |  |                                              |
| 113536581 | dbi       | BAF08964.1     | Oso2g0537700                                             | Oryza sativa (japonica cultivar-group)                                                |         |  |                                              |



|     |          |           |     |                |                                                           |                                             |         |                                              |
|-----|----------|-----------|-----|----------------|-----------------------------------------------------------|---------------------------------------------|---------|----------------------------------------------|
| 910 | 0        | 150009971 | ref | YP_001304720.1 | alkyl hydroperoxide reductase subunit C                   | Parabacteroides distansons ATCC 8503        | group 2 | VLGFFYPADFTFVCPTEVSTVHKAWHDASSETGALSEGMYVRG  |
| 911 | 0        | 149838401 | gb  | ABR45098.1     | alkyl hydroperoxide reductase subunit C                   | Parabacteroides distansons ATCC 8503        | group 1 | FFYPLDFTFVCPTEVSTVHAWATODRGGGLGNLKEGVALRG    |
| 912 | 2.66E-16 | 85709406  | ref | ZP_01040471.1  | peroxiredoxin                                             | Taraxaculum camphoratus                     | group 2 | MGISGFFPADWTFVCPTEVSTVSHKAWHDISEVLSVGLADRA   |
| 914 | 0        | 85688116  | gb  | EAQ28120.1     | peroxiredoxin                                             | Erythrobacter sp. NAP1                      | group 3 | MLGVGNLKVSLFFWPKDFTFVCPTEVHHAWRTHRDHAGVAQRA  |
| 915 | 1.40E-13 | 94958241  | ref | YP_01944056.1  | alkyl hydroperoxide reductase/ Thiol specific antioxidant | Acidobacteria bacterium Ellin345            | group 2 | CFYPADEFVCPTEVSTVHKAWHDHSEVLDLGLAQRGADGIG    |
| 916 | 0        | 46907834  | ref | YP_014223.1    | alkyl hydroperoxide reductase subunit C                   | Acidobacteria bacterium Ellin345            | group 1 | VSLFFYPMDFTFVCPTEVSTVHAWRTHRDHAGVAQRA        |
|     |          | 47094074  | ref | ZP_00231801.1  | peroxiredoxin, putative                                   | Listeria monocytogenes str. 4b F2365        |         |                                              |
|     |          | 153167188 | ref | ZP_01927469.1  | peroxiredoxin, putative                                   | Listeria monocytogenes str. 4b H7858        |         |                                              |
|     |          | 153202520 | ref | ZP_01944056.1  | hypothetical protein LMHG_01712                           | Listeria monocytogenes FSL NI-017           |         |                                              |
|     |          | 46881103  | gb  | AA104400.1     | putative peroxiredoxin                                    | Listeria monocytogenes str. 4b F2365        |         |                                              |
|     |          | 47017560  | gb  | EAL08366.1     | peroxiredoxin, putative                                   | Listeria monocytogenes str. 4b H7858        |         |                                              |
|     |          | 133727122 | gb  | EBA28620.1     | hypothetical protein LMHG_01712                           | Listeria monocytogenes FSL NI-017           |         |                                              |
|     |          | 133735296 | gb  | EBA33693.1     | hypothetical protein LMMSG_00932                          | Listeria monocytogenes HPB2282              |         |                                              |
| 917 | 0        | 54301427  | gb  | AAV33168.1     | alkyl hydroperoxide reductase                             | Helicobacter pylori                         | group 1 | FFWPKDFTFVCPTEVSVHFAWKNTPVKGGIGEAIALRGNMK    |
| 918 | 0        | 71067866  | gb  | AAZ22925.1     | thioredoxin peroxidase                                    | Haliotis discus hannai                      | group 1 | FFYPLDFTFVCPTEVSDVSHLAWINTPRQGGIAGEVAFRG     |
| 919 | 0        | 116074890 | ref | ZP_01472151.1  | thioredoxin peroxidase                                    | Synechococcus sp. RS9916                    | group 1 | FFYPLDFTFVCPTEVLDVSDSSHLAWIQTPRQGGIAGEVAFRG  |
| 920 | 0        | 39998336  | ref | NP_954287.1    | thioredoxin peroxidase                                    | Synechococcus sp. RS9916                    | group 1 | VTKFFYPDLDFTFVCPSEVSVTHMAWKNTPVNGGGIAGEVAFRG |
| 921 | 0        | 71906203  | ref | YP_283790.1    | thioredoxin peroxidase                                    | Geobacter sulfurreducens PCA                | group 1 | NLKFFYPDLDFTFVCPSEVSIHLAWKNITAVECGIAGEVAFRG  |
|     |          | 71845824  | gb  | AA245320.1     | Alkyl hydroperoxide reductase/ Thiol specific antioxidant | Dechloromonas aromatica RCB                 | group 1 |                                              |
| 922 | 0        | 28870281  | ref | NP_792900.1    | alkyl hydroperoxide reductase, subunit C                  | Dechloromonas aromatica RCB                 | group 2 | FFYPADFTFVCPTEVSTVHAAWHNTSPVLIAGLADRGDGGVGS  |
|     |          | 28853528  | gb  | AAO96595.1     | alkyl hydroperoxide reductase, subunit C                  | Pseudomonas syringae pv. tomato str. DC3000 | group 1 |                                              |
| 923 | 0        | 1351314   | sp  | P48822         | TDX1 BRUMA Thioredoxin peroxidase 1 (Peroxiredoxin)       | Bruglia malayi                              | group 1 | VLAFFYPDLDFTFVCPTECSHSLAWIQTPRVGGIAGTGISYVRG |
| 924 | 0        | 125773251 | ref | XP_001357884.1 | thioredoxin peroxidase 1                                  | Drosophila pseudoobscura                    | group 1 | VLGFFYPDLDFTFVCPTEVSVSHLAWCNDRNGVGGEGISLRG   |
|     |          | 54637618  | gb  | EAL27020.1     | GA19159-PA                                                | Drosophila pseudoobscura                    | group 1 |                                              |
| 925 | 0        | 77460742  | ref | YP_350249.1    | Alkyl hydroperoxide reductase/ Thiol specific antioxidant | Pseudomonas fluorescens PFO-1               | group 1 | VLVFFYPDLDFTFVCPSEVSIHNAWRNTPVNGGGIAGEVAFRG  |
| 926 | 0        | 115712104 | ref | XP_794871.2    | Alkyl hydroperoxide reductase/ Thiol specific antioxidant | Pseudomonas fluorescens PFO-1               | group 1 | CSGFFYPDLDFTFVCPTEVSHLAWINTPRQGGIAGVLAGVALRG |
|     |          | 115973522 | ref | XP_001191584.1 | PREDICTED: similar to mitochondrial truncated thioredoxin | Strongylocentrotus purpuratus               | group 1 | VLFFYPDLDFTFVCPTECSVTHLAWINIPREGGLIGHTLRG    |
| 927 | 0        | 157674503 | gb  | ABV60347.1     | putative peroxiredoxin                                    | Strongylocentrotus purpuratus               | group 1 | FFYPLDFTFVCPTEVSVHAWWNTIPRNGIGVLLPGLALRG     |
| 928 | 2.56E-15 | 44337083  | gbj | BA240970.1     | antigen                                                   | Entamoeba histolytica                       | group 1 | LFYPADFTFVCPTEVSVHAWWNTIPRNGIGVLLPGLALRG     |
| 929 | 0        | 109096829 | ref | XP_001097248.1 | PREDICTED: peroxiredoxin 3 isoform 1                      | Micaca mullata                              | group 2 | RIKAFKFINLEYPDLWTFVCPTEQLKYSVKGGVGGAGIARRG   |
|     |          | 88779478  | ref | ZP_011760955.1 | putative alkyl hydroperoxide reductase, subunit C         | Reinekea sp. MED297                         | group 3 | LLTIGFFWPKDFTFVCPTEVLFVHFQWRRAQHEDEGVADRAVSV |
| 931 | 4.65E-14 | 51173152  | gb  | AAO9522.2      | 30 kDa type I collagen binding protein                    | Entamoeba histolytica                       | group 1 | VLVFFYPDLDFTFVCPTECSVSHLAWLNTPHAGVALRGDLGLG  |
| 932 | 0        | 118471486 | ref | YP_889147.1    | alkyl hydroperoxide reductase                             | Mycobacterium smegmatis str. MC2 155        | group 1 | FFYPLDFTFVCPTEVSVHAWWNTIPRNGIGVLLPGLALRG     |
|     |          | 1408576   | gb  | AAC4148.1      | alkyl hydroperoxide reductase C                           | Mycobacterium smegmatis str. MC2 155        | group 2 | LFYPADFTFVCPTEVSVHAWWNTIPRNGIGVLLPGLALRG     |
|     |          | 1408578   | gb  | AAC44139.1     | alkyl hydroperoxide reductase C                           | Mycobacterium smegmatis str. MC2 155        | group 2 |                                              |
| 933 | 0        | 145220123 | ref | YP_001130832.1 | alkyl hydroperoxide reductase                             | Mycobacterium smegmatis str. MC2 155        | group 1 | RIKAFKFINLEYPDLWTFVCPTEQLKYSVKGGVGGAGIARRG   |
|     |          | 145206827 | gb  | ABP37330.1     | alkyl hydroperoxide reductase/ Thiol specific antioxidant | Prosthecochloris vibriiformis DSM 265       | group 1 | LLTIGFFWPKDFTFVCPTEVLFVHFQWRRAQHEDEGVADRAVSV |
| 934 | 0        | 154248140 | ref | YP_001419098.1 | Peroxiredoxin                                             | Xanthobacter autotrophicus Pw2              | group 2 | FFYPADFTFVCPTEVSTVHAWWNTIPRNGIGVLLPGLALRG    |
|     |          | 154162229 | gb  | ABS69441.1     | Peroxiredoxin                                             | Xanthobacter autotrophicus Pw2              | group 2 |                                              |
| 935 | 2.35E-13 | 163776578 | gb  | EDQ90197.1     | predicted protein                                         | Monosiga brevicollis MX1                    | group 1 | LFYPDLWTFVCPTEVSTVHAWWNTIPRNGIGVLLPGLALRG    |
| 936 | 2.29E-11 | 158148206 | emb | CAP08909.1     | Thio-Specific Antioxidant (TSA) Peroxidase                | Chlamydia trachomatis                       | group 4 | ISLFFYPKDFTFVCPTEVLTGTHSRWLAVARAGGIEGSLALRA  |
|     |          | 158148208 | emb | CAP08910.1     | Thio-Specific Antioxidant (TSA) Peroxidase                | Chlamydia trachomatis                       |         |                                              |
|     |          | 158148210 | emb | CAP08911.1     | Thio-Specific Antioxidant (TSA) Peroxidase                | Chlamydia trachomatis                       |         |                                              |
|     |          | 158148212 | emb | CAP08912.1     | Thio-Specific Antioxidant (TSA) Peroxidase                | Chlamydia trachomatis                       |         |                                              |
|     |          | 158148214 | emb | CAP08913.1     | Thio-Specific Antioxidant (TSA) Peroxidase                | Chlamydia trachomatis                       |         |                                              |
|     |          | 158148216 | emb | CAP08914.1     | Thio-Specific Antioxidant (TSA) Peroxidase                | Chlamydia trachomatis                       |         |                                              |
|     |          | 158148218 | emb | CAP08915.1     | Thio-Specific Antioxidant (TSA) Peroxidase                | Chlamydia trachomatis                       |         |                                              |
|     |          | 158148220 | emb | CAP08916.1     | Thio-Specific Antioxidant (TSA) Peroxidase                | Chlamydia trachomatis                       |         |                                              |
|     |          | 158148222 | emb | CAP08917.1     | Thio-Specific Antioxidant (TSA) Peroxidase                | Chlamydia trachomatis                       |         |                                              |
|     |          | 158148224 | emb | CAP08918.1     | Thio-Specific Antioxidant (TSA) Peroxidase                | Chlamydia trachomatis                       |         |                                              |
|     |          | 158148226 | emb | CAP08919.1     | Thio-Specific Antioxidant (TSA) Peroxidase                | Chlamydia trachomatis                       |         |                                              |
|     |          | 158148228 | emb | CAP08920.1     | Thio-Specific Antioxidant (TSA) Peroxidase                | Chlamydia trachomatis                       |         |                                              |
|     |          | 158148230 | emb | CAP08921.1     | Thio-Specific Antioxidant (TSA) Peroxidase                | Chlamydia trachomatis                       |         |                                              |
|     |          | 158148232 | emb | CAP08922.1     | Thio-Specific Antioxidant (TSA) Peroxidase                | Chlamydia trachomatis                       |         |                                              |
|     |          | 158148234 | emb | CAP08923.1     | Thio-Specific Antioxidant (TSA) Peroxidase                | Chlamydia trachomatis                       |         |                                              |
|     |          | 158148236 | emb | CAP08924.1     | Thio-Specific Antioxidant (TSA) Peroxidase                | Chlamydia trachomatis                       |         |                                              |
| 937 | 0        | 158314123 | ref | YP_001506631.1 | alkyl hydroperoxide reductase/ Thiol specific antioxidant | Frankia sp. EAN11pec                        | group 3 | FFWPKDFTFVCPTEVSTVHAWRQNHSCVGLGDDGVAQRAVLID  |
|     |          | 158109528 | gb  | AAU25726.1     | alkyl hydroperoxide reductase/ Thiol specific antioxidant | Frankia sp. EAN11pec                        | group 2 | CFYPADEFVCPTEVSTVHKAWHDHSEVLSVGLADRGAGGIG    |
| 938 | 9.15E-17 | 52082573  | ref | YP_081364.1    | alkyl hydroperoxide reductase (small subunit)             | Bacillus licheniformis ATCC 14580           | group 2 |                                              |
|     |          | 52787968  | ref | YP_083797.1    | AhpC                                                      | Bacillus licheniformis ATCC 14580           |         |                                              |
|     |          | 52005784  | gb  | AAU25726.1     | alkyl hydroperoxide reductase (small subunit)             | Bacillus licheniformis ATCC 14580           |         |                                              |
|     |          | 52350470  | gb  | AAU43104.1     | AhpC                                                      | Bacillus licheniformis DSM 13               |         |                                              |

|     |             |            |                |                                                             |                                |                     |        |  |         |                                               |
|-----|-------------|------------|----------------|-------------------------------------------------------------|--------------------------------|---------------------|--------|--|---------|-----------------------------------------------|
| 939 | 0118094468  | ref        | XP_001233893.1 | PREDICTED: similar to natural killer cell enhancing factor  | <i>Gallus gallus</i>           |                     |        |  | group 1 | FFYPLDFTFVCPTECHLAWINTPKQGGGLVYLKEGIAYRGVSV   |
| 940 | 0149828023  | ref        | ZP_01916271.1  | alkyl hydroperoxidase reductase/ Thiol specific antioxidant | <i>Limnospira</i>              | limnospira_05       | MED105 |  | group 2 | FFYPADFTFVCPTEVSTHKAHADATEEGLALRGVLDQGVK      |
| 941 | 04982322    | 11         | EDM2443.1      | alkyl hydroperoxidase reductase/ Thiol specific antioxidant | <i>Limnospira</i>              | limnospira_05       | MED105 |  | group 1 | VLVSVFFYPLDFTFVCPTEVSTHKAHADATEEGLALRGVLDQGVK |
| 942 | 021653667   | 11         | AAIM62760.1    | 2-cys peroxiredoxin-like protein                            | <i>Arabidopsis thaliana</i>    |                     |        |  | group 1 | FFYPMDFTFVCPTEVSTHKAHADATEEGLALRGVLDQGVK      |
| 943 | 0150384572  | ref        | ZP_01923257.1  | alkyl hydroperoxidase reductase/ Thiol specific antioxidant | <i>Vitellina vadenensis</i>    | ATCC BAA-548        |        |  | group 1 | FFYPLDFTFVCPTEVSTHKAHADATEEGLALRGVLDQGVK      |
| 944 | 0150259018  | 11         | EDM96266.1     | alkyl hydroperoxidase reductase/ Thiol specific antioxidant | <i>Vitellina vadenensis</i>    | ATCC BAA-548        |        |  | group 1 | FFYPLDFTFVCPTEVSTHKAHADATEEGLALRGVLDQGVK      |
| 945 | 058377838   | ref        | XP_308081.2    | thioredoxin-dependent peroxidase (AGAP011054-PA)            | <i>Anopheles gambiae</i>       | str. PEST           |        |  | group 1 | FFYPLDFTFVCPTEVSTHKAHADATEEGLALRGVLDQGVK      |
| 946 | 05246172    | 11         | EAAG3855.3     | thioredoxin-dependent peroxidase (AGAP011054-PA)            | <i>Anopheles gambiae</i>       | str. PEST           |        |  | group 1 | FFYPLDFTFVCPTEVSTHKAHADATEEGLALRGVLDQGVK      |
| 947 | 0124495008  | 11         | ABN13585.1     | thioredoxin peroxidase                                      | <i>Antennaria franciscana</i>  |                     |        |  | group 1 | FFYPLDFTFVCPTEVSTHKAHADATEEGLALRGVLDQGVK      |
| 948 | 078096720   | ref        | XP_369489.1    | alkyl hydroperoxidase reductase/ Thiol specific antioxidant | <i>Burkholderia</i>            | str. 383            |        |  | group 3 | FFYPLDFTFVCPTEVSTHKAHADATEEGLALRGVLDQGVK      |
| 949 | 077967465   | 11         | ABB08845.1     | alkyl hydroperoxidase reductase/ Thiol specific antioxidant | <i>Burkholderia</i>            | str. 383            |        |  | group 3 | FFYPLDFTFVCPTEVSTHKAHADATEEGLALRGVLDQGVK      |
| 946 | 7.55E-18    | 1244843332 | emb            | CAM32539.1                                                  | Peroxidoxin protein            |                     |        |  | group 2 | MFYPADFTFVCPTEVSTHKAHADATEEGLALRGVLDQGVK      |
| 947 | 0108563937  | ref        | XP_628253.1    | alkyl hydroperoxidase reductase                             | <i>Helicobacter pylori</i>     | HPAG1               |        |  | group 1 | FFYPLDFTFVCPTEVSTHKAHADATEEGLALRGVLDQGVK      |
| 948 | 0107837710  | 11         | ABF68579.1     | alkyl hydroperoxidase reductase                             | <i>Helicobacter pylori</i>     | HPAG1               |        |  | group 1 | FFYPLDFTFVCPTEVSTHKAHADATEEGLALRGVLDQGVK      |
| 949 | 0109123569  | ref        | XP_001108989.2 | PREDICTED: peroxidase 2 isoform 1                           | <i>Micacaca multata</i>        |                     |        |  | group 1 | FFYPLDFTFVCPTEVSTHKAHADATEEGLALRGVLDQGVK      |
| 949 | 071413207   | ref        | XP_808754.1    | typreredoxin peroxidase                                     | <i>Typanosoma cruzi</i>        | strain CL Brener    |        |  | group 1 | FFYPLDFTFVCPTEVSTHKAHADATEEGLALRGVLDQGVK      |
| 950 | 070873021   | 11         | EAN86903.1     | typreredoxin peroxidase                                     | <i>Typanosoma cruzi</i>        |                     |        |  | group 1 | FFYPLDFTFVCPTEVSTHKAHADATEEGLALRGVLDQGVK      |
| 950 | 071396508   | ref        | XP_802393.1    | typreredoxin peroxidase, putative                           | <i>Typanosoma cruzi</i>        | strain CL Brener    |        |  | group 1 | FFYPLDFTFVCPTEVSTHKAHADATEEGLALRGVLDQGVK      |
| 941 | 07403567    | ref        | XP_804571.1    | typreredoxin peroxidase, putative                           | <i>Typanosoma cruzi</i>        | strain CL Brener    |        |  | group 1 | FFYPLDFTFVCPTEVSTHKAHADATEEGLALRGVLDQGVK      |
| 942 | 071407508   | ref        | XP_806218.1    | typreredoxin peroxidase                                     | <i>Typanosoma cruzi</i>        | strain CL Brener    |        |  | group 1 | FFYPLDFTFVCPTEVSTHKAHADATEEGLALRGVLDQGVK      |
| 943 | 07153771    | 11         | AAF04974.1     | typreredoxin peroxidase                                     | <i>Typanosoma cruzi</i>        |                     |        |  | group 1 | FFYPLDFTFVCPTEVSTHKAHADATEEGLALRGVLDQGVK      |
| 944 | 07163771    | 11         | AAF04974.1     | typreredoxin peroxidase                                     | <i>Typanosoma cruzi</i>        |                     |        |  | group 1 | FFYPLDFTFVCPTEVSTHKAHADATEEGLALRGVLDQGVK      |
| 945 | 07176134    | emb        | CAA09922.1     | typreredoxin peroxidase homologue                           | <i>Typanosoma cruzi</i>        |                     |        |  | group 1 | FFYPLDFTFVCPTEVSTHKAHADATEEGLALRGVLDQGVK      |
| 946 | 070862626   | 11         | EAN80947.1     | typreredoxin peroxidase, putative                           | <i>Typanosoma cruzi</i>        |                     |        |  | group 1 | FFYPLDFTFVCPTEVSTHKAHADATEEGLALRGVLDQGVK      |
| 947 | 070867612   | 11         | EAN8270.1      | typreredoxin peroxidase, putative                           | <i>Typanosoma cruzi</i>        |                     |        |  | group 1 | FFYPLDFTFVCPTEVSTHKAHADATEEGLALRGVLDQGVK      |
| 948 | 070869897   | 11         | EAN84367.1     | typreredoxin peroxidase, putative                           | <i>Typanosoma cruzi</i>        |                     |        |  | group 1 | FFYPLDFTFVCPTEVSTHKAHADATEEGLALRGVLDQGVK      |
| 951 | 01034866122 | ref        | XP_6158683.1   | alkyl hydroperoxidase reductase/ Thiol specific antioxidant | <i>Springoplyx</i>             | alaskensis RB2286   |        |  | group 2 | MGIGFFYPADFTFVCPTEVSTHKAHADATEEGLALRGVLDQGVK  |
| 952 | 098976199   | 11         | ABF52350.1     | alkyl hydroperoxidase reductase/ Thiol specific antioxidant | <i>Springoplyx</i>             | alaskensis RB2286   |        |  | group 2 | MGIGFFYPADFTFVCPTEVSTHKAHADATEEGLALRGVLDQGVK  |
| 952 | 0154337704  | ref        | XP_001562236.1 | peroxidoxin                                                 | <i>Leishmania braziliensis</i> | MHOM/BR75/IM2904    |        |  | group 1 | FFYPLDFTFVCPTEVSTHKAHADATEEGLALRGVLDQGVK      |
| 953 | 04104346    | 11         | AAAD2002.1     | thioredoxin peroxidase                                      | <i>Leishmania braziliensis</i> |                     |        |  | group 1 | FFYPLDFTFVCPTEVSTHKAHADATEEGLALRGVLDQGVK      |
| 954 | 3.06E-10    | 166154817  | ref            | XP_001654935.1                                              | thioredoxin peroxidase         |                     |        |  | group 4 | FFYPLDFTFVCPTEVSTHKAHADATEEGLALRGVLDQGVK      |
| 955 | 016593308   | emb        | CAP04303.1     | thioredoxin peroxidase                                      | <i>Chlamydia trachomatis</i>   | L29/UCH-1/Bu        |        |  | group 1 | FFYPLDFTFVCPTEVSTHKAHADATEEGLALRGVLDQGVK      |
| 956 | 0165931680  | emb        | CAP07257.1     | thioredoxin peroxidase                                      | <i>Chlamydia trachomatis</i>   | L29/UCH-1/Bu        |        |  | group 1 | FFYPLDFTFVCPTEVSTHKAHADATEEGLALRGVLDQGVK      |
| 957 | 0117818506  | ref        | XP_856288.1    | alkyl hydroperoxidase reductase subunit C                   | <i>Chlamydia trachomatis</i>   | L29/UCH-1/proctitis |        |  | group 1 | FFYPLDFTFVCPTEVSTHKAHADATEEGLALRGVLDQGVK      |
| 958 | 0117559913  | 11         | ABK36861.1     | alkyl hydroperoxidase reductase subunit C                   | <i>Chlamydia trachomatis</i>   | L29/UCH-1/proctitis |        |  | group 1 | FFYPLDFTFVCPTEVSTHKAHADATEEGLALRGVLDQGVK      |
| 959 | 0111223887  | ref        | XP_714681.1    | alkyl hydroperoxidase reductase                             | <i>Chlamydia trachomatis</i>   | L29/UCH-1/proctitis |        |  | group 1 | FFYPLDFTFVCPTEVSTHKAHADATEEGLALRGVLDQGVK      |
| 960 | 0111151419  | emb        | CA163134.1     | alkyl hydroperoxidase reductase                             | <i>Chlamydia trachomatis</i>   | L29/UCH-1/proctitis |        |  | group 1 | FFYPLDFTFVCPTEVSTHKAHADATEEGLALRGVLDQGVK      |
| 961 | 091783507   | ref        | XP_588713.1    | putative alkyl hydroperoxidase reductase subunit C          | <i>Plasmodium falciparum</i>   | ATCC 7966           |        |  | group 2 | FFYPLDFTFVCPTEVSTHKAHADATEEGLALRGVLDQGVK      |
| 962 | 091687461   | 11         | ABE30861.1     | putative alkyl hydroperoxidase reductase subunit C          | <i>Plasmodium falciparum</i>   | ATCC 7966           |        |  | group 2 | FFYPLDFTFVCPTEVSTHKAHADATEEGLALRGVLDQGVK      |
| 963 | 074096113   | ref        | NP_001027810.1 | peroxidoxin-like                                            | <i>Ciona intestinalis</i>      |                     |        |  | group 1 | FFYPLDFTFVCPTEVSTHKAHADATEEGLALRGVLDQGVK      |
| 964 | 015134912   | 11         | BAD38621.1     | peroxidoxin-like                                            | <i>Ciona intestinalis</i>      |                     |        |  | group 1 | FFYPLDFTFVCPTEVSTHKAHADATEEGLALRGVLDQGVK      |
| 965 | 0149200564  | ref        | XP_393445.2    | PREDICTED: similar to thioredoxin peroxidase 1 CG           | <i>Apis mellifera</i>          |                     |        |  | group 1 | FFYPLDFTFVCPTEVSTHKAHADATEEGLALRGVLDQGVK      |
| 966 | 0149136336  | 11         | EDM2478.1      | thioredoxin peroxidase                                      | <i>Leishmania braziliensis</i> | ATCC 7966           |        |  | group 1 | FFYPLDFTFVCPTEVSTHKAHADATEEGLALRGVLDQGVK      |
| 967 | 08860465    | ref        | ZP_01135103.1  | peroxidoxin 2                                               | <i>Pseudomonas</i>             | tunicata D2         |        |  | group 1 | FFYPLDFTFVCPTEVSTHKAHADATEEGLALRGVLDQGVK      |
| 968 | 0121595203  | ref        | XP_987099.1    | alkyl hydroperoxidase reductase subunit C                   | <i>Acidovorax</i>              | sp. JS42            |        |  | group 2 | FFYPLDFTFVCPTEVSTHKAHADATEEGLALRGVLDQGVK      |
| 969 | 0118482812  | 11         | ABK3023.1      | alkyl hydroperoxidase reductase/ Thiol specific antioxidant | <i>Acidovorax</i>              | sp. JS42            |        |  | group 2 | FFYPLDFTFVCPTEVSTHKAHADATEEGLALRGVLDQGVK      |
| 970 | 0148978075  | ref        | ZP_014814622.1 | alkyl hydroperoxidase reductase c22 protein                 | <i>Populus trichocarpa</i>     |                     |        |  | group 1 | ISSFFYPDFTFVCPTEVSTHKAHADATEEGLALRGVLDQGVK    |
| 971 | 0145862759  | 11         | EDK28033.1     | alkyl hydroperoxidase reductase c22 protein                 | <i>Vibrio</i>                  | cholerae SWAT-3     |        |  | group 2 | FFYPLDFTFVCPTEVSTHKAHADATEEGLALRGVLDQGVK      |
| 972 | 0113474135  | ref        | XP_720196.1    | alkyl hydroperoxidase reductase/ Thiol specific antioxidant | <i>Trichodesmium</i>           | erythraeum IMS101   |        |  | group 1 | FFYPLDFTFVCPTEVSTHKAHADATEEGLALRGVLDQGVK      |
| 973 | 0110165183  | 11         | ABG49723.1     | alkyl hydroperoxidase reductase/ Thiol specific antioxidant | <i>Trichodesmium</i>           | erythraeum IMS101   |        |  | group 1 | FFYPLDFTFVCPTEVSTHKAHADATEEGLALRGVLDQGVK      |
| 974 | 046576851   | 11         | Q9N198         | PRDX_ASCSU Peroxiredoxin (A6Prx) [Thioredoxin peroxidase]   | <i>Ascaris suum</i>            |                     |        |  | group 1 | FFYPLDFTFVCPTEVSTHKAHADATEEGLALRGVLDQGVK      |
| 975 | 06855466    | 11         | BAA90476.1     | thioredoxin peroxidase                                      | <i>Ascaris suum</i>            |                     |        |  | group 1 | FFYPLDFTFVCPTEVSTHKAHADATEEGLALRGVLDQGVK      |
| 976 | 029150161   | emb        | CAD76624.1     | alkyl hydroperoxidase reductase C22 protein                 | <i>Helicobacter pylori</i>     |                     |        |  | group 1 | FFYPLDFTFVCPTEVSTHKAHADATEEGLALRGVLDQGVK      |
| 977 | 029150179   | emb        | CAD79633.1     | alkyl hydroperoxidase reductase C22 protein                 | <i>Helicobacter pylori</i>     |                     |        |  | group 1 | FFYPLDFTFVCPTEVSTHKAHADATEEGLALRGVLDQGVK      |
| 978 | 015859325   | 11         | EDP31820.1     | AhpC/Prx family protein                                     | <i>Brugia malayi</i>           |                     |        |  | group 1 | SSITLAFYPLDFTFVCPTEVSTHKAHADATEEGLALRGVLDQGVK |
| 979 | 011995220   | emb        | CAC19677.1     | peroxidoxin                                                 | <i>Chlamydomonas</i>           | reinhardtii         |        |  | group 1 | FFYPLDFTFVCPTEVSTHKAHADATEEGLALRGVLDQGVK      |
| 980 | 014582684   | 11         | AAK69837.1     | peroxidoxin                                                 | <i>Chlamydomonas</i>           | reinhardtii         |        |  | group 1 | FFYPLDFTFVCPTEVSTHKAHADATEEGLALRGVLDQGVK      |
| 981 | 049115354   | ref        | ZP_01842098.1  | alkyl hydroperoxidase reductase/ Thiol specific antioxidant | <i>Shewanella</i>              | batlica OS223       |        |  | group 2 | FFYPLDFTFVCPTEVSTHKAHADATEEGLALRGVLDQGVK      |
| 982 | 0146664804  | 11         | EDK50184.1     | alkyl hydroperoxidase reductase/ Thiol specific antioxidant | <i>Shewanella</i>              | batlica OS223       |        |  | group 2 | FFYPLDFTFVCPTEVSTHKAHADATEEGLALRGVLDQGVK      |
| 983 | 071032125   | ref        | XP_765704.1    | 2-Cys peroxidoxin                                           | <i>Thelazia parva</i>          | strain Muiguga      |        |  | outlier | VFYPLDFTFVCPSEVLGSHKAWKELDVGGVSVSSSEGFHSRA    |

|      |               |                |                                                            |                                                                |  |  |  |  |         |                                                    |
|------|---------------|----------------|------------------------------------------------------------|----------------------------------------------------------------|--|--|--|--|---------|----------------------------------------------------|
| 978  | 68352661.gb   | EA33421.1      | 2-Cys peroxiredoxin, putative                              | <i>Theliera parva</i>                                          |  |  |  |  | group 1 | FFVPLDFTVCPTEVSVTHLAWINTPREGLGVLKEGIAYRRG          |
| 979  | 60654143.gb   | AA2X29764.1    | peroxiredoxin 2                                            | synthetic construct                                            |  |  |  |  | group 1 | VLGFYPLDFTVCPTEVSVTHLAWINTPREGLGVLKEGIAYRRG        |
| 980  | 126323578.ref | XP_001386408.1 | PREDICTED: similar to MG82793 protein                      | <i>Monodelphis domestica</i>                                   |  |  |  |  | group 1 | FFVPLDFTVCPTEVSVTHLAWINTPREGLGVLKEGIAYRRG          |
|      | 146082019.ref | XP_001464446.1 | trypanredoxin peroxidase                                   | <i>Leishmania infantum</i> JPCM5                               |  |  |  |  | group 1 | FFVPLDFTVCPTEVSVTHLAWINTPREGLGVLKEGIAYRRG          |
|      | 14582662.gb   | AA4K69586.1    | AF312397.1 peroxidoxin 2                                   | <i>Leishmania chagasi</i>                                      |  |  |  |  |         |                                                    |
|      | 16751318.gb   | AA2L5847.1     | cytosolic peroxidoxin                                      | <i>Leishmania infantum</i>                                     |  |  |  |  |         |                                                    |
| 981  | 3752763.ref   | NP_931108.1    | alkyl hydroperoxide reductase, small subunit (antioxidant) | <i>Photobacterium luminescens</i> subsp. <i>lummondii</i> T101 |  |  |  |  | group 1 | VLVNLKFFWPMDFTFVCPSEVHNWRKTPVGGIGAGVALRG           |
| 982  | 3.27E-15      | 16752263.gb    | alkyl hydroperoxide reductase, small subunit (antioxidant) | <i>Photobacterium luminescens</i> subsp. <i>lummondii</i> T101 |  |  |  |  | group 4 | FFVPLDFTVCPTEVSVTHLAWINTPREGLGVLKEGIAYRRG          |
| 983  | 0             | 8163551.gb     | antioxidant, AhpC/1 sa family                              | <i>Chlamydomonas reinhardtii</i> AhpC/1                        |  |  |  |  | group 1 | FFVPLDFTVCPTEVSVTHLAWINTPREGLGVLKEGIAYRRG          |
|      | 0             | 83753829.pdb   | Chain A, Crystall Structure Of Alkyl Hydroperoxide-R       | <i>Helicobacter pylori</i>                                     |  |  |  |  | group 1 | FFVPLDFTVCPTEVSVTHLAWINTPREGLGVLKEGIAYRRG          |
|      | 0             | 83753830.pdb   | Chain B, Crystall Structure Of Alkyl Hydroperoxide-R       | <i>Helicobacter pylori</i>                                     |  |  |  |  | group 1 | FFVPLDFTVCPTEVSVTHLAWINTPREGLGVLKEGIAYRRG          |
|      | 0             | 83753831.pdb   | Chain C, Crystall Structure Of Alkyl Hydroperoxide-R       | <i>Helicobacter pylori</i>                                     |  |  |  |  | group 1 | FFVPLDFTVCPTEVSVTHLAWINTPREGLGVLKEGIAYRRG          |
|      | 0             | 83753832.pdb   | Chain D, Crystall Structure Of Alkyl Hydroperoxide-R       | <i>Helicobacter pylori</i>                                     |  |  |  |  | group 1 | FFVPLDFTVCPTEVSVTHLAWINTPREGLGVLKEGIAYRRG          |
|      | 0             | 83753833.pdb   | Chain E, Crystall Structure Of Alkyl Hydroperoxide-R       | <i>Helicobacter pylori</i>                                     |  |  |  |  | group 1 | FFVPLDFTVCPTEVSVTHLAWINTPREGLGVLKEGIAYRRG          |
|      | 0             | 83753834.pdb   | Chain F, Crystall Structure Of Alkyl Hydroperoxide-R       | <i>Helicobacter pylori</i>                                     |  |  |  |  | group 1 | FFVPLDFTVCPTEVSVTHLAWINTPREGLGVLKEGIAYRRG          |
|      | 0             | 83753835.pdb   | Chain G, Crystall Structure Of Alkyl Hydroperoxide-R       | <i>Helicobacter pylori</i>                                     |  |  |  |  | group 1 | FFVPLDFTVCPTEVSVTHLAWINTPREGLGVLKEGIAYRRG          |
|      | 0             | 83753836.pdb   | Chain H, Crystall Structure Of Alkyl Hydroperoxide-R       | <i>Helicobacter pylori</i>                                     |  |  |  |  | group 1 | FFVPLDFTVCPTEVSVTHLAWINTPREGLGVLKEGIAYRRG          |
|      | 0             | 83753837.pdb   | Chain I, Crystall Structure Of Alkyl Hydroperoxide-R       | <i>Helicobacter pylori</i>                                     |  |  |  |  | group 1 | FFVPLDFTVCPTEVSVTHLAWINTPREGLGVLKEGIAYRRG          |
|      | 0             | 83753838.pdb   | Chain J, Crystall Structure Of Alkyl Hydroperoxide-R       | <i>Helicobacter pylori</i>                                     |  |  |  |  | group 1 | FFVPLDFTVCPTEVSVTHLAWINTPREGLGVLKEGIAYRRG          |
| 984  | 0             | 17864676.ref   | thioredoxin peroxidase 2 CG1274-PA, isoform A              | <i>Drosophila melanogaster</i>                                 |  |  |  |  | group 1 | VLLLFYPLDFTVCPTEVSVTHLAWINTPREGLGVLKEGIAYRRG       |
|      | 0             | 24656348.ref   | thioredoxin peroxidase 2 CG1274-PB, isoform B              | <i>Drosophila melanogaster</i>                                 |  |  |  |  | group 1 | VLLLFYPLDFTVCPTEVSVTHLAWINTPREGLGVLKEGIAYRRG       |
|      | 0             | 7230428.gb     | AF-167099.1 thioredoxin peroxidase 2                       | <i>Drosophila melanogaster</i>                                 |  |  |  |  | group 1 | VLLLFYPLDFTVCPTEVSVTHLAWINTPREGLGVLKEGIAYRRG       |
|      | 0             | 12744787.gb    | AF-321614.1 secretable thioredoxin peroxidase              | <i>Drosophila melanogaster</i>                                 |  |  |  |  | group 1 | VLLLFYPLDFTVCPTEVSVTHLAWINTPREGLGVLKEGIAYRRG       |
|      | 0             | 7292296.gb     | CG1274-PA, isoform A                                       | <i>Drosophila melanogaster</i>                                 |  |  |  |  | group 1 | VLLLFYPLDFTVCPTEVSVTHLAWINTPREGLGVLKEGIAYRRG       |
|      | 0             | 16768228.gb    | AA4F7704.1                                                 | <i>Drosophila melanogaster</i>                                 |  |  |  |  | group 1 | VLLLFYPLDFTVCPTEVSVTHLAWINTPREGLGVLKEGIAYRRG       |
|      | 0             | 23095360.gb    | AA2L28333.1                                                | <i>Drosophila melanogaster</i>                                 |  |  |  |  | group 1 | VLLLFYPLDFTVCPTEVSVTHLAWINTPREGLGVLKEGIAYRRG       |
| 985  | 1.31E-16      | 56421110.ref   | YP_148428.1                                                | <i>Drosophila melanogaster</i>                                 |  |  |  |  | group 2 | CFYPADFTVCPTEVSVTHLAWINTPREGLGVLKEGIAYRRG          |
|      | 0             | 56380952.dbl   | BAD76860.1                                                 | <i>Drosophila melanogaster</i>                                 |  |  |  |  | group 2 | CFYPADFTVCPTEVSVTHLAWINTPREGLGVLKEGIAYRRG          |
| 986  | 6.01E-15      | 165902907.gb   | EDR28610.1                                                 | <i>Geobacillus kaustophilus</i> HTA426                         |  |  |  |  | group 1 | LFYPLDWTFCVPTTEQLKVSCHQAWCEADKKGVGTVGSRRG          |
| 987  | 0             | 84354944.ref   | ZP_00979838.1                                              | <i>Enhanobea dispar</i> SAW760                                 |  |  |  |  | group 3 | YFYPKDFTVCPTEVSVTHLAWINTPREGLGVLKEGIAYRRG          |
|      | 0             | 107028881.ref  | YP_729818.1                                                | <i>Burkholderia cenocepacia</i> PC184                          |  |  |  |  | group 3 | YFYPKDFTVCPTEVSVTHLAWINTPREGLGVLKEGIAYRRG          |
|      | 0             | 115351979.ref  | YP_773818.1                                                | <i>Burkholderia cenocepacia</i> AU 1054                        |  |  |  |  | group 3 | YFYPKDFTVCPTEVSVTHLAWINTPREGLGVLKEGIAYRRG          |
|      | 0             | 116689861.ref  | YP_835684.1                                                | <i>Burkholderia ambifaria</i> AMMD                             |  |  |  |  | group 3 | YFYPKDFTVCPTEVSVTHLAWINTPREGLGVLKEGIAYRRG          |
|      | 0             | 118709538.ref  | ZP_01562119.1                                              | <i>Burkholderia cenocepacia</i> H2424                          |  |  |  |  | group 3 | YFYPKDFTVCPTEVSVTHLAWINTPREGLGVLKEGIAYRRG          |
|      | 0             | 105898045.gb   | ABF-81003.1                                                | <i>Burkholderia cenocepacia</i> MC0-3                          |  |  |  |  | group 3 | YFYPKDFTVCPTEVSVTHLAWINTPREGLGVLKEGIAYRRG          |
|      | 0             | 115281967.gb   | AB187484.1                                                 | <i>Burkholderia cenocepacia</i> AU 1054                        |  |  |  |  | group 3 | YFYPKDFTVCPTEVSVTHLAWINTPREGLGVLKEGIAYRRG          |
|      | 0             | 116648050.gb   | ABK08691.1                                                 | <i>Burkholderia ambifaria</i> AMMD                             |  |  |  |  | group 3 | YFYPKDFTVCPTEVSVTHLAWINTPREGLGVLKEGIAYRRG          |
|      | 0             | 118652710.gb   | EA159494.1                                                 | <i>Burkholderia cenocepacia</i> MC0-3                          |  |  |  |  | group 3 | YFYPKDFTVCPTEVSVTHLAWINTPREGLGVLKEGIAYRRG          |
|      | 0             | 124872731.gb   | EA164447.1                                                 | <i>Burkholderia cenocepacia</i> PC184                          |  |  |  |  | group 3 | YFYPKDFTVCPTEVSVTHLAWINTPREGLGVLKEGIAYRRG          |
| 988  | 0             | 89092387.ref   | ZP_01165341.1                                              | <i>Burkholderia cenocepacia</i> PC184                          |  |  |  |  | group 2 | FFYPADFTVCPTEVSVTHLAWINTPREGLGVLKEGIAYRRG          |
|      | 0             | 89083475.gb    | EAR62693.1                                                 | <i>Oceanospirillum</i> sp. MED92                               |  |  |  |  | group 2 | FFYPADFTVCPTEVSVTHLAWINTPREGLGVLKEGIAYRRG          |
| 989  | 0             | 54301431.gb    | AA303170.1                                                 | <i>Oceanospirillum</i> sp. MED92                               |  |  |  |  | group 1 | FFVPLDFTVCPTEVSVTHLAWINTPREGLGVLKEGIAYRRG          |
| 990  | 3.86E-14      | 165900036.gb   | EDR26531.1                                                 | <i>Enhanobea dispar</i> SAW760                                 |  |  |  |  | group 1 | LFYPLDWTFCVPTTEQLKVSCHQAWCEADKKGVGTVGSRRG          |
| 991  | 0             | 126305670.ref  | XP_001363120.1                                             | <i>Enhanobea dispar</i> SAW760                                 |  |  |  |  | group 1 | LFYPLDWTFCVPTTEQLKVSCHQAWCEADKKGVGTVGSRRG          |
| 992  | 0             | 822969.gb      | AAA98946.1                                                 | <i>Monodelphis domestica</i>                                   |  |  |  |  | group 3 | KGGLFFYPKDFTFVCPTEVSVTHLAWINTPREGLGVLKEGIAYRRG     |
| 993  | 8.36E-20      | 6805338.ref    | ZP_00539484.1                                              | <i>Corynebacterium diphtheriae</i>                             |  |  |  |  | group 2 | CFYYPADFTVCPTEVSVTHLAWINTPREGLGVLKEGIAYRRG         |
|      | 0             | 68008052.gb    | EA087288.1                                                 | <i>Exiguobacterium sibiricum</i> 295-15                        |  |  |  |  | group 2 | CFYYPADFTVCPTEVSVTHLAWINTPREGLGVLKEGIAYRRG         |
| 994  | 0             | 965473.gb      | AAA74933.1                                                 | <i>Legionella pneumophila</i>                                  |  |  |  |  | group 1 | VLVFFYPLDFTVCPSEVSVTHLAWINTPREGLGVLKEGIAYRRG       |
| 995  | 4.53E-14      | 165898407.gb   | EDR2570.1                                                  | <i>Enhanobea dispar</i> SAW760                                 |  |  |  |  | group 1 | LFYPLDWTFCVPTTEQLKVSCHQAWCEADKKGVGTVGSRRG          |
| 996  | 0             | 54301409.gb    | AAV33159.1                                                 | <i>Helicobacter pylori</i>                                     |  |  |  |  | group 1 | FFVPLDWTFCVPTTEQLKVSCHQAWCEADKKGVGTVGSRRG          |
|      | 0             | 54301413.gb    | AAV33161.1                                                 | <i>Helicobacter pylori</i>                                     |  |  |  |  | group 1 | FFVPLDWTFCVPTTEQLKVSCHQAWCEADKKGVGTVGSRRG          |
|      | 0             | 54301421.gb    | AAV33165.1                                                 | <i>Helicobacter pylori</i>                                     |  |  |  |  | group 1 | FFVPLDWTFCVPTTEQLKVSCHQAWCEADKKGVGTVGSRRG          |
| 997  | 5.07E-14      | 67466737.ref   | XP_649510.1                                                | <i>Enhanobea histolytica</i> HM-1.IMSS                         |  |  |  |  | group 1 | RIKAFKFINLEFPLDWTFCVPTTEQLKVSCHQAWCEADKKGVGTVGSRRG |
| 998  | 0             | 166404129.ref  | XP_001640260.1                                             | <i>Nematostella vectensis</i>                                  |  |  |  |  | group 1 | FFYPLDFTVCPTEVSVTHLAWINTPREGLGVLKEGIAYRRG          |
| 999  | 0             | 166227393.gb   | ED048197.1                                                 | <i>Nematostella vectensis</i>                                  |  |  |  |  | group 1 | FFYPLDFTVCPTEVSVTHLAWINTPREGLGVLKEGIAYRRG          |
|      | 0             | 164519504.pdb  | 2R1I                                                       | <i>Homo sapiens</i>                                            |  |  |  |  | group 1 | FFYPLDFTVCPTEVSVTHLAWINTPREGLGVLKEGIAYRRG          |
|      | 0             | 164519505.pdb  | 2R1I                                                       | <i>Homo sapiens</i>                                            |  |  |  |  | group 1 | FFYPLDFTVCPTEVSVTHLAWINTPREGLGVLKEGIAYRRG          |
| 1000 | 3.36E-14      | 509151111.ref  | YP_061063.1                                                | <i>Streptococcus pyogenes</i> MGAS10394                        |  |  |  |  | group 2 | CFYPADFTVCPTEVSVTHLAWINTPREGLGVLKEGIAYRRG          |
|      | 0             | 50904185.gb    | AA187900.1                                                 | <i>Streptococcus pyogenes</i> MGAS10394                        |  |  |  |  | group 2 | CFYPADFTVCPTEVSVTHLAWINTPREGLGVLKEGIAYRRG          |
| 1001 | 5.51E-13      | 108762609.ref  | YP_629816.1                                                | <i>Myxococcus xanthus</i> DK 1622                              |  |  |  |  | group 3 | MLTVGVSLFAMPKDFTFVCPTEVSVTHLAWINTPREGLGVLKEGIAYRRG |
|      | 0             | 108468489.gb   | ABF-91674.1                                                | <i>Myxococcus xanthus</i> DK 1622                              |  |  |  |  | group 3 | MLTVGVSLFAMPKDFTFVCPTEVSVTHLAWINTPREGLGVLKEGIAYRRG |
| 1002 | 0             | 15612536.ref   | NP_224189.1                                                | <i>Helicobacter pylori</i> J99                                 |  |  |  |  | group 1 | FFVPLDFTVCPTEVSVTHLAWINTPREGLGVLKEGIAYRRG          |
|      | 0             | 7387493.sp     | P56876                                                     | <i>Helicobacter pylori</i> J100                                |  |  |  |  | group 1 | FFVPLDFTVCPTEVSVTHLAWINTPREGLGVLKEGIAYRRG          |
|      | 0             | 499094.gb      | AAA18984.1                                                 | <i>Helicobacter pylori</i> J101                                |  |  |  |  | group 1 | FFVPLDFTVCPTEVSVTHLAWINTPREGLGVLKEGIAYRRG          |
|      | 0             | 4156103.gb     | AAAD07055.1                                                | <i>Helicobacter pylori</i> J99                                 |  |  |  |  | group 1 | FFVPLDFTVCPTEVSVTHLAWINTPREGLGVLKEGIAYRRG          |
|      | 0             | 54301407.gb    | AAV33158.1                                                 | <i>Helicobacter pylori</i>                                     |  |  |  |  | group 1 | FFVPLDFTVCPTEVSVTHLAWINTPREGLGVLKEGIAYRRG          |

|      |          |           |     |               |                                                           |                                                               |         |                                                  |
|------|----------|-----------|-----|---------------|-----------------------------------------------------------|---------------------------------------------------------------|---------|--------------------------------------------------|
| 1003 | 0        | 91077388  | ref | XP_014274.36  | hypothetical protein GSPAT10030676001                     | <i>Tribolium castaneum</i>                                    | group 1 | FFYPLDFTFVCPTECVSHLAWMINTPREGGI.LGLHTLRGVLR      |
| 1004 | 0        | 113867474 | ref | YP_725963.1   | unmanned protein product                                  | <i>Raistonia eutropha</i> H16                                 | group 3 | YFYPKDFTFVCPTEGGDFAVLGVKLAWRREHKGAVLRVSV         |
| 1005 | 0        | 113828260 | emb | CAJ02956.1    | Peroxiredoxin                                             | <i>Raistonia eutropha</i> H16                                 | group 1 | VLGFFYPLDFTFVCPSEVSHNWRNTAVNGGIGAGVAFRG          |
| 1006 | 0        | 121590891 | ref | ZP_01678214.1 | antioxidant, AhpC/Tsa family                              | <i>Vibrio cholerae</i> 2740-80                                | group 1 | FFYPLDFTFVCPTEVDSCHLAWMINTPRQGG.LVLEKEGIAYRG     |
| 1007 | 1.19E-14 | 165904782 | gb  | AAU29515.1    | natural killer cell enhancing factor                      | <i>Ichneumon punctatus</i>                                    | group 1 | LVVFFYPLDFTFVCPTEVDSCHLAWMINTPRQGG.LVLEKEGIAYRG  |
| 1008 | 0        | 52630967  | gb  | AAU184947.1   | hypothetical protein, conserved                           | <i>Enhanoeba dispar</i> SAW760                                | group 1 | LVVFFYPLDFTFVCPTEVDSCHLAWMINTPRQGG.LVLEKEGIAYRG  |
| 1009 | 0        | 148237771 | ref | NP_011085485  | putative cytosolic thioredoxin peroxidase                 | <i>Toxoptera cilirostris</i>                                  | group 1 | NLKFYPLDFTFVCPTEVDSCHLAWMINTPRQGG.LVLEKEGIAYRG   |
|      |          | 49255979  | gb  | AAH72833.1    | MGC80194 protein                                          | <i>Xenopus laevis</i>                                         |         |                                                  |
|      |          | 52078466  | gb  | AAH82463.1    | MGC80194 protein                                          | <i>Xenopus laevis</i>                                         |         |                                                  |
| 1010 | 7.17E-19 | 5163492   | gb  | AAF040685.1   | AF157561.1 thioredoxin peroxidase 2                       | <i>Schistosoma mansoni</i>                                    | group 1 | VSTLYPLDFTFVCPTEVDSCHLAWMINTPRQGG.LVLEKEGIAYRG   |
| 1011 | 1.82E-14 | 546850154 | gb  | BAD66879.1    | peroxiredoxin                                             | <i>Enhanoeba mostikowskii</i>                                 | group 1 | FFYPLDFTFVCPTEVDSCHLAWMINTPRQGG.LVLEKEGIAYRG     |
| 1012 | 0        | 74272711  | gb  | ABA0115.1     | chloplast thioredoxin peroxidase                          | <i>Chlamydomonas reinhardtii</i>                              | group 1 | FFYPLDFTFVCPTEVDSCHLAWMINTPRQGG.LVLEKEGIAYRG     |
| 1013 | 1.38E-16 | 157122266 | gb  | EDO66406.1    | hypothetical protein FTAG_00282                           | <i>Francisella tularensis</i> subsp. <i>holarctica</i> FSC022 | group 1 | FFYPLDFTFVCPTEVDSCHLAWMINTPRQGG.LVLEKEGIAYRG     |
| 1014 | 0        | 156230721 | gb  | AAI52139.1    | Zgc:110343 protein                                        | <i>Danio rerio</i>                                            | group 1 | FFYPLDFTFVCPTEVDSCHLAWMINTPRQGG.LVLEKEGIAYRG     |
| 1015 | 0        | 152028582 | gb  | ABS23650.1    | alkyl hydroperoxide reductase/ Thiol specific antioxidant | <i>Anaeromyxobacter</i> sp. Fw1 09-5                          | group 1 | FFYPLDFTFVCPTEVDSCHLAWMINTPRQGG.LVLEKEGIAYRG     |
| 1016 | 0        | 150003422 | ref | YP_001298166  | alkyl hydroperoxide reductase/ Thiol specific antioxidant | <i>Anaeromyxobacter</i> sp. Fw1 09-5                          | group 1 | FFYPLDFTFVCPTEVDSCHLAWMINTPRQGG.LVLEKEGIAYRG     |
| 1017 | 1.02E-15 | 15828102  | ref | NP_302365.1   | alkyl hydroperoxide reductase subunit C                   | <i>Bacteroides vulgatus</i> ATCC 8482                         | group 3 | FFYPLDFTFVCPTEVDSCHLAWMINTPRQGG.LVLEKEGIAYRG     |
| 1018 | 0        | 75765543  | pdb | 1YEX          | alkyl hydroperoxide reductase                             | <i>Mycobacterium leprae</i> TN                                | group 2 | FFYPLDFTFVCPTEVDSCHLAWMINTPRQGG.LVLEKEGIAYRG     |
|      |          | 75765543  | pdb | 1YEX          | alkyl hydroperoxide reductase                             | <i>Mycobacterium leprae</i> TN                                | group 3 | FFYPLDFTFVCPTEVDSCHLAWMINTPRQGG.LVLEKEGIAYRG     |
|      |          | 75765544  | pdb | 1YEX          | alkyl hydroperoxide reductase                             | <i>Mycobacterium leprae</i> TN                                | group 2 | FFYPLDFTFVCPTEVDSCHLAWMINTPRQGG.LVLEKEGIAYRG     |
|      |          | 75765545  | pdb | 1YEX          | alkyl hydroperoxide reductase                             | <i>Mycobacterium leprae</i> TN                                | group 2 | FFYPLDFTFVCPTEVDSCHLAWMINTPRQGG.LVLEKEGIAYRG     |
|      |          | 75765546  | pdb | 1YEX          | alkyl hydroperoxide reductase                             | <i>Mycobacterium leprae</i> TN                                | group 2 | FFYPLDFTFVCPTEVDSCHLAWMINTPRQGG.LVLEKEGIAYRG     |
| 1019 | 9.84E-17 | 145482827 | ref | XP_001427436  | hypothetical protein GSPAT10030676001                     | <i>Paramecium tetraurelia</i> strain d4-2                     | group 1 | LFYDFDFTFVCPTEVDSCHLAWMINTPRQGG.LVLEKEGIAYRG     |
| 1020 | 0        | 124394517 | emb | CAK60038.1    | unmanned protein product                                  | <i>Paramecium tetraurelia</i>                                 | group 1 | VSVELKFFYPLDFTFVCPTEVSHLAWMINTPRQGG.LVLEKEGIAYRG |
| 1021 | 0        | 109130180 | ref | YP_001087492  | PREDICTED: similar to Peroxiredoxin-4 (Prx-IV) (Thio)     | <i>Micacaca mullata</i>                                       | group 1 | FFYPLDFTFVCPTEVDSCHLAWMINTPRQGG.LVLEKEGIAYRG     |
| 1022 | 0        | 19338954  | gb  | AAI86893.1    | AF479023.1 putative alkyl hydroperoxide reductase         | <i>Helicobacter pylori</i>                                    | group 1 | FFYPLDFTFVCPTEVDSCHLAWMINTPRQGG.LVLEKEGIAYRG     |
| 1023 | 0        | 34850269  | emb | CAE47410.1    | alkyl hydroperoxide reductase C22                         | <i>Helicobacter pylori</i>                                    | group 1 | FFYPLDFTFVCPTEVDSCHLAWMINTPRQGG.LVLEKEGIAYRG     |
|      |          | 34850271  | emb | CAE47411.1    | alkyl hydroperoxide reductase C22                         | <i>Helicobacter pylori</i>                                    | group 1 | FFYPLDFTFVCPTEVDSCHLAWMINTPRQGG.LVLEKEGIAYRG     |
|      |          | 34850273  | emb | CAE47412.1    | alkyl hydroperoxide reductase C22                         | <i>Helicobacter pylori</i>                                    | group 1 | FFYPLDFTFVCPTEVDSCHLAWMINTPRQGG.LVLEKEGIAYRG     |
| 1024 | 0        | 148981290 | ref | ZP_01816350.1 | alkyl hydroperoxide reductase C22 protein                 | <i>Vibrio natries bacterium</i> SWAT-3                        | group 1 | FFYPLDFTFVCPTEVDSCHLAWMINTPRQGG.LVLEKEGIAYRG     |
| 1025 | 0        | 145960922 | gb  | EDK26250.1    | alkyl hydroperoxide reductase C22 protein                 | <i>Vibrio natries bacterium</i> SWAT-3                        | group 1 | FFYPLDFTFVCPTEVDSCHLAWMINTPRQGG.LVLEKEGIAYRG     |
| 1026 | 5.65E-18 | 118034007 | ref | ZP_01505445.1 | thioredoxin peroxidase                                    | <i>Nicotiana tabacum</i>                                      | group 2 | FFYPLDFTFVCPTEVDSCHLAWMINTPRQGG.LVLEKEGIAYRG     |
| 1027 | 0        | 117980240 | gb  | EAL194940.1   | alkyl hydroperoxide reductase                             | <i>Burkholderia phyatumatum</i> STM815                        | group 1 | VLEFFYPADYTFVCPTEVSHLAWMINTPRQGG.LVLEKEGIAYRG    |
| 1028 | 0        | 15805962  | ref | NP_213339.1   | alkyl hydroperoxide reductase                             | <i>Burkholderia phyatumatum</i> STM815                        | group 1 | VLEFFYPADYTFVCPTEVSHLAWMINTPRQGG.LVLEKEGIAYRG    |
|      |          | 2983132   | gb  | AAO06735.1    | alkyl hydroperoxide reductase                             | <i>Aquifex aeolicus</i> VF5                                   | group 3 | VSLFAWPKDFTFVCPTEVSHLAWMINTPRQGG.LVLEKEGIAYRG    |
| 1029 | 2.78E-20 | 114649304 | ref | XP_001141020  | putative alkyl hydroperoxide reductase (subunit C) ox     | <i>Raistonia pickettii</i> 12J                                | group 2 | WSVIFMFAAFIFNCPTEVSHLAWMINTPRQGG.LVLEKEGIAYRG    |
| 1030 | 0        | 118578922 | ref | YP_900172.1   | alkyl hydroperoxide reductase                             | <i>Streptomyces coelicolor</i> A3(2)                          | group 1 | FFYPLDFTFVCPTEVDSCHLAWMINTPRQGG.LVLEKEGIAYRG     |
| 1031 | 0        | 110597729 | ref | ZP_01386013.1 | alkyl hydroperoxide reductase/ Thiol specific antioxidant | <i>Raistonia pickettii</i> 12J                                | group 1 | VMALFYPLDFTFVCPSEISVTHLAWMINTPRQGG.LVLEKEGIAYRG  |
| 1032 | 0        | 110340636 | gb  | EAL159116.1   | putative alkyl hydroperoxide reductase (subunit C) ox     | <i>Raistonia pickettii</i> 12J                                | group 2 | VLEFFYPADYTFVCPTEVSHLAWMINTPRQGG.LVLEKEGIAYRG    |
|      |          | 151578980 | gb  | EDNA3377.1    | alkyl hydroperoxide reductase/ Thiol specific antioxidant | <i>Raistonia pickettii</i> 12D                                | group 2 | FFYPADFTFVCPTEVSHLAWMINTPRQGG.LVLEKEGIAYRG       |
| 1033 | 0        | 16328653  | ref | YP_798373.1   | Peroxiredoxin                                             | <i>Enterobacter sakazakii</i>                                 | group 1 | VLGFFYPLDFTFVCPTEVSHLAWMINTPRQGG.LVLEKEGIAYRG    |
| 1034 | 0        | 27807469  | ref | NP_777188.1   | peroxiredoxin 2                                           | <i>Bos taurus</i>                                             | group 1 | FFYPLDFTFVCPTEVSHLAWMINTPRQGG.LVLEKEGIAYRG       |
| 1035 | 7.89E-18 | 58269430  | ref | XP_571871.1   | thioredoxin-dependent peroxidoreductase                   | <i>Bos taurus</i>                                             | group 1 | VFPMDFTFVCPTEVSHLAWMINTPRQGG.LVLEKEGIAYRG        |
| 1036 | 0        | 78224377  | ref | YP_386124.1   | alkyl hydroperoxide reductase/ Thiol specific antioxidant | <i>Geobacter metallireducens</i> GS-15                        | group 1 | VTKFFYPLDFTFVCPSEVSHLAWMINTPRQGG.LVLEKEGIAYRG    |
|      |          | 78195632  | gb  | ABB33399.1    | alkyl hydroperoxide reductase/ Thiol specific antioxidant | <i>Geobacter metallireducens</i> GS-15                        | group 1 | VTKFFYPLDFTFVCPSEVSHLAWMINTPRQGG.LVLEKEGIAYRG    |

|      |          |           |     |                |                                                       |                                                                               |         |                                              |
|------|----------|-----------|-----|----------------|-------------------------------------------------------|-------------------------------------------------------------------------------|---------|----------------------------------------------|
| 1037 | 0        | 71409504  | ref | XP_807095.1    | tryparedoxin peroxidase, putative                     | <i>Trypanosoma cruzi</i> strain CL Brener                                     | outlier | KGLSRRANLNGKIQLFYPMDFTFYCPTEAFEDFKINQTVVSSC  |
|      |          | 70871016  | gb  | EA6N5244.1     | tryparedoxin peroxidase, putative                     | <i>Trypanosoma cruzi</i>                                                      | group 1 | LFYPPDFTYCPTEVLGTLHAWLKTFRGGGGVYLYTGASLRG    |
| 1038 | 5.78E-16 | 145551454 | ref | XP_001461404.1 | hypothetical protein GSPA1T002635e4001                | <i>Paramecium tetraurelia</i> strain d4-2                                     | group 1 | FFYPLDFTFVCPTEVSVHAWINPVLVLLAGLGLNGVVK       |
|      |          | 124429238 | emb | CAK94031.1     | unnamed protein product                               | <i>Paramecium tetraurelia</i>                                                 | group 1 | FFYPADFTFVCPTEVSVVHAWHRDEKYSKTLGALRGKTKLK    |
| 1039 | 0        | 21885578  | gb  | AA1M74564.1    | antioxidant protein                                   | <i>Mus musculus</i>                                                           | group 1 | YSDFFYPLDFTFVCPTECHLAWISOPREGGLGEGVSFRGVKK   |
| 1040 | 0        | 163783929 | ref | ZP_02178900.1  | alkyl hydroperoxide reductase                         | <i>Hydrogenivirga</i> sp. 128-S-R1-1                                          | group 1 | VLVFFYPLDFTFVCPSEVSIHNAWRNTPITNGGIGAGVALRA   |
|      |          | 159880797 | gb  | EDP74330.1     | alkyl hydroperoxide reductase                         | <i>Hydrogenivirga</i> sp. 128-S-R1-1                                          | group 1 | FMFKDFTFVCPTEVSVHFAWIKNTPYKGGIGENALRGNMK     |
| 1041 | 0        | 58331972  | ref | NP_0010111136  | peroxidoxin 1                                         | <i>Xenopus tropicalis</i>                                                     | group 1 | CFYPAIDFVCPTEVSTVHKAWHDDSDVLGDGLAQRGADGIG    |
|      |          | 54261560  | gb  | AA484184.1     | peroxidoxin 1                                         | <i>Xenopus tropicalis</i>                                                     | group 2 |                                              |
| 1042 | 0        | 89271386  | emb | CAJ82539.1     | peroxidoxin 1                                         | <i>Haemophilus influenzae</i> R2866                                           | group 1 |                                              |
|      |          | 46132967  | ref | ZP_00155972.2  | COG0450: Peroxiredoxin                                | <i>Haemophilus influenzae</i> R2866                                           | group 1 |                                              |
|      |          | 68248736  | ref | YP_247848.1    | probable peroxidoxin                                  | <i>Haemophilus influenzae</i> 86-028NP                                        | group 1 |                                              |
|      |          | 68056935  | gb  | AA8X7186.1     | probable peroxidoxin                                  | <i>Haemophilus influenzae</i> 86-028NP                                        | group 1 |                                              |
| 1043 | 0        | 54301423  | gb  | AAV33166.1     | alkyl hydroperoxide reductase                         | <i>Helicobacter pylori</i>                                                    | group 1 |                                              |
| 1044 | 3.46E-14 | 15675837  | ref | NP_270011.1    | putative alkyl hydroperoxidase                        | <i>Streptococcus pyogenes</i> M1 GAS                                          | group 2 |                                              |
|      |          | 19748952  | ref | NP_680088.1    | putative alkyl hydroperoxidase                        | <i>Streptococcus pyogenes</i> MGAS8232                                        | group 2 |                                              |
|      |          | 21911306  | ref | NP_665574.1    | putative alkyl hydroperoxidase                        | <i>Streptococcus pyogenes</i> MGAS315                                         | group 2 |                                              |
|      |          | 28896679  | ref | NP_803029.1    | putative alkyl hydroperoxidase                        | <i>Streptococcus pyogenes</i> SSI-1                                           | group 2 |                                              |
|      |          | 71904414  | ref | YP_281217.1    | peroxidoxin reductase (NAD(P)H)                       | <i>Streptococcus pyogenes</i> MGAS6180                                        | group 2 |                                              |
|      |          | 71911581  | ref | YP_283131.1    | peroxidoxin reductase (NAD(P)H)                       | <i>Streptococcus pyogenes</i> MGAS5005                                        | group 2 |                                              |
|      |          | 94989408  | ref | YP_591509.1    | peroxidoxin                                           | <i>Streptococcus pyogenes</i> MGAS9429                                        | group 2 |                                              |
|      |          | 94991343  | ref | YP_599443.1    | peroxidoxin                                           | <i>Streptococcus pyogenes</i> MGAS10270                                       | group 2 |                                              |
|      |          | 94993298  | ref | YP_601397.1    | peroxidoxin                                           | <i>Streptococcus pyogenes</i> MGAS2096                                        | group 2 |                                              |
|      |          | 139474526 | ref | YP_001129242   | alkyl hydroperoxide reductase subunit C               | <i>Streptococcus pyogenes</i> str. Manfredo                                   | group 2 |                                              |
|      |          | 13623068  | gb  | AAK34732.1     | putative alkyl hydroperoxidase                        | <i>Streptococcus pyogenes</i> M1 GAS                                          | group 2 |                                              |
|      |          | 19748203  | gb  | AAJ98587.1     | putative alkyl hydroperoxidase                        | <i>Streptococcus pyogenes</i> MGAS8232                                        | group 2 |                                              |
|      |          | 21905520  | gb  | AAAM0377.1     | putative alkyl hydroperoxidase                        | <i>Streptococcus pyogenes</i> MGAS315                                         | group 2 |                                              |
|      |          | 28811933  | dbj | BAC64862.1     | putative alkyl hydroperoxidase                        | <i>Streptococcus pyogenes</i> SSI-1                                           | group 2 |                                              |
|      |          | 71803509  | gb  | AA872862.1     | peroxidoxin reductase (NAD(P)H)                       | <i>Streptococcus pyogenes</i> MGAS6180                                        | group 2 |                                              |
|      |          | 71854363  | gb  | AA252386.1     | peroxidoxin reductase (NAD(P)H)                       | <i>Streptococcus pyogenes</i> MGAS5005                                        | group 2 |                                              |
|      |          | 94542916  | gb  | ABF32965.1     | peroxidoxin                                           | <i>Streptococcus pyogenes</i> MGAS9429                                        | group 2 |                                              |
|      |          | 94544851  | gb  | ABF34899.1     | peroxidoxin                                           | <i>Streptococcus pyogenes</i> MGAS10270                                       | group 2 |                                              |
|      |          | 94546806  | gb  | ABF36853.1     | peroxidoxin                                           | <i>Streptococcus pyogenes</i> MGAS2096                                        | group 2 |                                              |
| 1045 | 0        | 71282444  | ref | YP_270148.1    | antioxidant, AhpC/Prx1 family                         | <i>Colwellia psycherythraea</i> 34H                                           | group 1 | VLVFFYPLDFTFVCPSEVSIHNAWRNTPVDGGGAGVAFRRG    |
|      |          | 71148184  | gb  | AAZ29657.1     | antioxidant, AhpC/Prx1 family                         | <i>Colwellia psycherythraea</i> 34H                                           | group 1 | FFYPLDFTFVCPTEVDSCHLAWINTPRQGGGLGVLEKGIATVRG |
| 1046 | 0        | 3396899   | dbj | BAA32086.1     | natural killer cell enhancing factor                  | <i>Cyprinus carpio</i>                                                        | group 1 | VLVFFYPLDFTFVCPSEVSIHNAWRNTPYKGGIGEGVALRGISS |
|      |          | 13365747  | dbj | BAB39202.1     | natural killer cell enhancing factor                  | <i>Cyprinus carpio</i>                                                        | group 1 |                                              |
| 1047 | 0        | 16759300  | ref | NP_454997.1    | probable peroxidase                                   | <i>Salmonella enterica</i> subsp. enterica serovar Typhi str. CT18            | group 1 |                                              |
|      |          | 16763782  | ref | NP_459397.1    | putative thiol-alkyl hydroperoxide reductase          | <i>Salmonella typhimurium</i> LT2                                             | group 1 |                                              |
|      |          | 29142849  | ref | NP_806191.1    | probable peroxidase                                   | <i>Salmonella enterica</i> subsp. enterica serovar Typhi Ty2                  | group 1 |                                              |
|      |          | 56414443  | ref | YP_151518.1    | probable peroxidase                                   | <i>Salmonella enterica</i> subsp. enterica serovar Paratyphi A str. ATCC 9150 | group 1 |                                              |
|      |          | 62179014  | ref | YP_215431.1    | putative thiol-alkyl hydroperoxide reductase          | <i>Salmonella enterica</i> subsp. enterica serovar Choleraesuis str. SC-B67   | group 1 |                                              |
|      |          | 161615414 | ref | YP_001589379   | hypothetical protein SPAB_03185                       | <i>Salmonella enterica</i> subsp. enterica serovar Paratyphi B str. SPB7      | group 1 |                                              |
|      |          | 25285289  | pir | gi             | ABO552, probable peroxidase                           | <i>Salmonella enterica</i> subsp. enterica serovar Typhi (strain CT18)        | group 1 |                                              |
|      |          | 16418906  | gb  | AA119356.1     | putative thiol-alkyl hydroperoxide reductase          | <i>Salmonella typhimurium</i> LT2                                             | group 1 |                                              |
|      |          | 16501671  | emb | CAD08558.1     | probable peroxidase                                   | <i>Salmonella enterica</i> subsp. enterica serovar Typhi                      | group 1 |                                              |
|      |          | 29138461  | gb  | AAO70051.1     | probable peroxidase                                   | <i>Salmonella enterica</i> subsp. enterica serovar Typhi Ty2                  | group 1 |                                              |
|      |          | 56128700  | gb  | AAV78206.1     | probable peroxidase                                   | <i>Salmonella enterica</i> subsp. enterica serovar Paratyphi A str. ATCC 9150 | group 1 |                                              |
|      |          | 62126647  | gb  | AA64350.1      | putative thiol-alkyl hydroperoxide reductase          | <i>Salmonella enterica</i> subsp. enterica serovar Choleraesuis str. SC-B67   | group 1 |                                              |
|      |          | 161364778 | gb  | ABX68546.1     | hypothetical protein SPAB_03185                       | <i>Salmonella enterica</i> subsp. enterica serovar Paratyphi B str. SPB7      | group 1 |                                              |
| 1048 | 2.44E-15 | 84998634  | ref | XP_954538.1    | 2-cys peroxidoxin, putative                           | <i>Theileria annulata</i> strain Ankara                                       | outlier | NLKVFFYPLDFTFVCPSEVSVSHKAWKELDYGGGGYSEGFSHRA |
|      |          | 65306536  | emb | CAJ73861.1     | 2-cys peroxidoxin, putative                           | <i>Theileria annulata</i>                                                     | outlier |                                              |
| 1049 | 0        | 81917543  | sp  | G9UKY1         | PRDX1, CRIGR Peroxiredoxin-1 (Thioredoxin peroxidase) | <i>Cricetulus griseus</i>                                                     | group 1 | FFYPLDFTFVCPTEVDSCHLAWINTPKQGGGLGVLEKGISFRG  |
|      |          | 69422333  | gb  | AAE32389.1     | thioredoxin peroxidase II                             | <i>Cricetulus griseus</i>                                                     | group 1 |                                              |
| 1050 | 4.56E-15 | 91214814  | ref | ZP_01251787.1  | putative thioredoxin peroxidase                       | <i>Psychotriplex torquus</i> ATCC 700755                                      | group 4 | VGKFWYPKDFTYCPTVEVHFAWLNTPKDGIEDNNTYRAYS     |
|      |          | 91872411  | gb  | EAS73611.1     | putative thioredoxin peroxidase                       | <i>Psychotriplex torquus</i> ATCC 700755                                      | group 4 | FFYPLDFTFVCPTEVSRVLAHLQWTLDRKGGGLGGVAYVRG    |
| 1051 | 0        | 146082084 | ref | XP_001464443   | tryparedoxin peroxidase                               | <i>Leishmania infantum</i> JPCM5                                              | group 1 | NMKFFYPMDFTFVCPTEVSTTHKAWINSTRIGDLAEQVALRG   |
|      |          | 13406855  | emb | CAJ66830.1     | tryparedoxin peroxidase                               | <i>Leishmania infantum</i>                                                    | group 1 | FFYPADFTFVCPTEVSTHAWINTPREGGLGVHLGVALRG      |
| 1052 | 0        | 56964193  | ref | YP_175924.1    | 2-cys peroxidoxin                                     | <i>Bacillus clausii</i> KSM-K16                                               | group 1 |                                              |
|      |          | 56910436  | dbj | BAD64963.1     | 2-cys peroxidoxin                                     | <i>Bacillus clausii</i> KSM-K16                                               | group 1 |                                              |
| 1053 | 0        | 90416750  | ref | ZP_01224680.1  | alkyl hydroperoxide reductase c22 protein             | marine gamma proteobacterium HT1                                              | group 2 | FFYPADFTFVCPTEVSTTHKAWHDSSEQGLADRGAEGVYK     |
|      |          | 90331503  | gb  | EAS46739.1     | alkyl hydroperoxide reductase c22 protein             | marine gamma proteobacterium HTCC2207                                         | group 2 | FFYPADFTFVCPTECSVTHKRWLNITDKAGGVKYLDSGLSFRG  |
| 1054 | 1.65E-16 | 29840734  | ref | NP_829840.1    | antioxidant, AhpC/Prx1 family                         | <i>Chlamydomonas reinhardtii</i> cvaeae GPIC                                  | group 4 | VLVFFYPMDFTFVCPSEVSVHNAWRNTPYKGGIGAGVALRA    |
|      |          | 29635064  | gb  | AAJ05716.1     | antioxidant, AhpC/Prx1 family                         | <i>Chlamydomonas reinhardtii</i> cvaeae GPIC                                  | group 4 | FFYPADFTFVCPTEVSTHAWINTPREGGLGVHLGVALRG      |
| 1055 | 0        | 71892009  | ref | YP_277739.1    | alkyl hydroperoxide reductase C22 protein             | <i>Candidatus Blochmannia pennsylvanicus</i> str. BPEIN                       | group 1 | VLVFFYPMDFTFVCPSEVSVHNAWRNTPYKGGIGAGVALRA    |
|      |          | 71799115  | gb  | AAZ40866.1     | alkyl hydroperoxide reductase C22 protein             | <i>Candidatus Blochmannia pennsylvanicus</i> str. BPEIN                       | group 1 | FFYPLDFTFVCPTEVSTHAWINTPREGGLGVHLGVALRG      |
| 1056 | 0        | 10281259  | gb  | AAJ5506.1      | AF301001_1 thioredoxin peroxidase 3                   | <i>Schistosoma mansoni</i>                                                    | group 1 | FFYPLDFTFVCPTEVSTHAWINTPREGGLGVHLGVALRG      |
|      |          | 10281265  | gb  | AAJ5506.1      | AF301001_1 thioredoxin peroxidase 3                   | <i>Schistosoma mansoni</i>                                                    | group 1 | FFYPLDFTFVCPTEVSTHAWINTPREGGLGVHLGVALRG      |
| 1057 | 0        | 71279436  | ref | YP_271361.1    | alkyl hydroperoxide reductase, subunit C              | <i>Colwellia psycherythraea</i> 34H                                           | group 2 | FFYPLDFTFVCPTEVSTHAWINTPREGGLGVHLGVALRG      |
|      |          | 71144517  | gb  | AAZ25649.1     | alkyl hydroperoxide reductase, subunit C              | <i>Colwellia psycherythraea</i> 34H                                           | group 2 | FFYPLDFTFVCPTEVSTHAWINTPREGGLGVHLGVALRG      |

|      |          |           |     |                |                                                             |                                                        |  |         |                                              |
|------|----------|-----------|-----|----------------|-------------------------------------------------------------|--------------------------------------------------------|--|---------|----------------------------------------------|
| 1058 | 0        | 50751518  | ref | XP_422437.1    | PREDICTED: similar to natural killer cell enhancing factor  | <i>Gallus gallus</i>                                   |  | group 1 | FFYPLDFTFVCPTEVDSCHLAWINPTKQGGI.GVYLKEGIAYRG |
| 1059 | 0        | 29027461  | gb  | AA062417.1     | PREDICTED: similar to natural killer cell enhancing factor  | <i>Gallus gallus</i>                                   |  | group 1 | ARLSLQLFYLDFTFVCPSEVSVTHCAWTRTRTAPEGGIGVDK   |
| 1060 | 1.75E-19 | 71274707  | ref | ZP_00650995.1  | peroxiredoxin 3                                             | <i>Toxoplasma gondii</i>                               |  | group 2 | VLKVFYPADFTFVCPTEVSTSHKAWHDISPISGLADRGAEIG   |
|      |          | 71899612  | ref | ZP_00681767.1  | Alkyl hydroperoxide reductase/ Thiol specific antioxidant   | <i>Xyella fastidiosa</i> Dixon                         |  |         |                                              |
|      |          | 71164439  | gb  | EA014153.1     | Alkyl hydroperoxide reductase/ Thiol specific antioxidant   | <i>Xyella fastidiosa</i> Amn-1                         |  |         |                                              |
|      |          | 71730654  | gb  | EA032730.1     | Alkyl hydroperoxide reductase/ Thiol specific antioxidant   | <i>Xyella fastidiosa</i> Amn-1                         |  |         |                                              |
| 1061 | 3.33E-12 | 4097710   | gb  | AA009623.1     | 30 kDa type I collagen binding protein                      | <i>Entamoeba histolytica</i>                           |  | group 1 | RVKAFKKFNLFYPLDWTFCVPTTEQLKVSVAGIARRGDDGIG   |
| 1062 | 0        | 119389031 | pdb | 2C0D           | A Chain A, Structure Of The Mitochondrial 2-Cys Peroxisomal | <i>Plasmodium falciparum</i>                           |  | group 1 | VTKLFYPLNYTFVCGPTEISVSHLAWKNMFKGGIGNSFALRG   |
|      |          | 119389032 | pdb | 2C0D           | B Chain B, Structure Of The Mitochondrial 2-Cys Peroxisomal | <i>Plasmodium falciparum</i>                           |  |         |                                              |
| 1063 | 0        | 118618391 | ref | YP_906723.1    | alkyl hydroperoxide reductase C protein AhpC                | <i>Mycobacterium ulcerans</i> Agy99                    |  | group 3 | LLTIGFFWPKDFTFVCPTEVLGIDSVHFQWRAGHDDGVAADV   |
|      |          | 118570501 | gb  | ABL05252.1     | alkyl hydroperoxide reductase C protein AhpC                | <i>Mycobacterium ulcerans</i> Agy99                    |  |         |                                              |
| 1064 | 0        | 23465199  | ref | NP_695802.1    | alkyl hydroperoxide reductase C22 protein                   | <i>Bifidobacterium longum</i> NCC2705                  |  | group 2 | VLGFTYPADFTFVCPTEVSCYHKAWHIDANEDGVAERGNWTFG  |
|      |          | 23526829  | gb  | AAAN24438.1    | alkyl hydroperoxide reductase C22 protein                   | <i>Bifidobacterium longum</i> NCC2705                  |  |         |                                              |
| 1065 | 0        | 54301425  | gb  | AAU33167.1     | alkyl hydroperoxide reductase                               | <i>Helicobacter pylori</i>                             |  | group 1 | FFWPKDFTFVCPTEVSVHFVAWKNTPVYKGGIGEAIALRGNMK  |
| 1066 | 0        | 50120056  | ref | YP_049223.1    | probable peroxidase                                         | <i>Erwinia carotovora</i> subsp. atroseptica SCRI1043  |  | group 1 | VLVNLKFFWPMDFTFVCPSEVHNARWTKPVKGGIGAGVALRG   |
| 1067 | 0        | 16123356  | ref | NP_406669.1    | putative alkyl hydroperoxide reductase subunit c            | <i>Yersinia pestis</i> CO92                            |  | group 1 | VLVNLKFFWPMDFTFVCPSEVHNARWTKPVKGGIGAGVALRG   |
|      |          | 22124895  | ref | NP_688318.1    | peroxidase                                                  | <i>Yersinia pestis</i> KIM                             |  |         |                                              |
|      |          | 45440586  | ref | NP_992125.1    | putative alkyl hydroperoxide reductase subunit c            | <i>Yersinia pestis</i> biovar Microtus str. 91001      |  |         |                                              |
|      |          | 51595275  | ref | YP_069486.1    | putative alkyl hydroperoxide reductase subunit c            | <i>Yersinia pseudotuberculosis</i> IP 32953            |  |         |                                              |
|      |          | 108808680 | ref | YP_652596.1    | putative alkyl hydroperoxide reductase subunit c            | <i>Yersinia pestis</i> Antiqua                         |  |         |                                              |
|      |          | 108811058 | ref | YP_646825.1    | alkyl hydroperoxide reductase subunit c                     | <i>Yersinia pestis</i> Nepal516                        |  |         |                                              |
|      |          | 145600088 | ref | YP_001164164.1 | alkyl hydroperoxide reductase subunit c                     | <i>Yersinia pestis</i> Pestoides F                     |  |         |                                              |
|      |          | 149364960 | ref | ZP_01868695.1  | putative alkyl hydroperoxide reductase subunit c            | <i>Yersinia pestis</i> CA88-4125                       |  |         |                                              |
|      |          | 153947559 | ref | YP_001402086.1 | antioxidant, AhpC/TSA family                                | <i>Yersinia pseudotuberculosis</i> IP 31758            |  |         |                                              |
|      |          | 162420648 | ref | YP_001607730.1 | antioxidant, AhpC/TSA family                                | <i>Yersinia pestis</i> Angola                          |  |         |                                              |
|      |          | 165926641 | ref | ZP_02222473.1  | antioxidant, AhpC/TSA family                                | <i>Yersinia pestis</i> biovar Orientalis str. F1991016 |  |         |                                              |
|      |          | 165936007 | ref | ZP_02224577.1  | antioxidant, AhpC/TSA family                                | <i>Yersinia pestis</i> biovar Orientalis str. IP275    |  |         |                                              |
|      |          | 166011015 | ref | ZP_02231913.1  | antioxidant, AhpC/TSA family                                | <i>Yersinia pestis</i> biovar Antiqua str. E1979001    |  |         |                                              |
|      |          | 21957730  | gb  | JAAM84569.1    | AE013702_8 putative peroxidase                              | <i>Yersinia pestis</i> KIM                             |  |         |                                              |
|      |          | 45434543  | gb  | AA561002.1     | putative alkyl hydroperoxide reductase subunit c            | <i>Yersinia pestis</i> biovar Microtus str. 91001      |  |         |                                              |
|      |          | 51588557  | emb | CAH20165.1     | putative alkyl hydroperoxide reductase subunit c            | <i>Yersinia pseudotuberculosis</i> IP 32953            |  |         |                                              |
|      |          | 10874706  | gb  | ABG17225.1     | alkyl hydroperoxide reductase subunit c                     | <i>Yersinia pestis</i> Nepal516                        |  |         |                                              |
|      |          | 108780593 | gb  | ABG14654.1     | putative alkyl hydroperoxide reductase subunit c            | <i>Yersinia pestis</i> Antiqua                         |  |         |                                              |
|      |          | 115348835 | emb | CAL21789.1     | putative alkyl hydroperoxide reductase subunit c            | <i>Yersinia pestis</i> CO92                            |  |         |                                              |
|      |          | 145211764 | gb  | ABP41191.1     | alkyl hydroperoxide reductase subunit c                     | <i>Yersinia pestis</i> Pestoides F                     |  |         |                                              |
|      |          | 149291373 | gb  | EDM41447.1     | putative alkyl hydroperoxide reductase subunit c            | <i>Yersinia pestis</i> CA88-4125                       |  |         |                                              |
|      |          | 152959054 | gb  | ABS46515.1     | antioxidant, AhpC/TSA family                                | <i>Yersinia pseudotuberculosis</i> IP 31758            |  |         |                                              |
|      |          | 162353463 | gb  | ABX87411.1     | antioxidant, AhpC/TSA family                                | <i>Yersinia pestis</i> Angola                          |  |         |                                              |
|      |          | 165916162 | gb  | EDR34759.1     | antioxidant, AhpC/TSA family                                | <i>Yersinia pestis</i> Angola                          |  |         |                                              |
|      |          | 165921569 | gb  | EDR38766.1     | antioxidant, AhpC/TSA family                                | <i>Yersinia pestis</i> biovar Orientalis str. F1991016 |  |         |                                              |
|      |          | 165990015 | gb  | EDR42316.1     | antioxidant, AhpC/TSA family                                | <i>Yersinia pestis</i> biovar Antiqua str. E1979001    |  |         |                                              |
| 1068 | 0        | 67919045  | ref | ZP_00512633.1  | Alkyl hydroperoxide reductase/ Thiol specific antioxidant   | <i>Chlorobium limicola</i> DSM 245                     |  | group 1 | VLVFFYPLDFTFVCPTECSVSHHAWLRTPKLGGIEAGVSLRG   |
|      |          | 67783306  | gb  | EA042897.1     | Alkyl hydroperoxide reductase/ Thiol specific antioxidant   | <i>Chlorobium limicola</i> DSM 245                     |  |         |                                              |
| 1069 | 1.67E-14 | 165903434 | gb  | EDR28974.1     | hypothetical protein, conserved                             | <i>Entamoeba dispar</i> SA0760                         |  | group 1 | LFYPLDWTFCVPTTEQLKVSVKGGVGTGYSRRGTGKDTQETIP  |
| 1070 | 0        | 77956920  | ref | ZP_00820993.1  | COG0450: Peroxiredoxin                                      | <i>Yersinia bercowieri</i> ATCC 43970                  |  | group 1 | VLVNLKFFWPMDFTFVCPSEVHNARWTKPVNGGIGAGVALRG   |
|      |          | 77962934  | ref | ZP_00826749.1  | COG0450: Peroxiredoxin                                      | <i>Yersinia moliereii</i> ATCC 43969                   |  |         |                                              |
| 1071 | 2.14E-18 | 89901016  | ref | YP_523487.1    | alkyl hydroperoxide reductase/ Thiol specific antioxidant   | <i>Rhodoferrax ferrireducens</i> T118                  |  | group 2 | VFYPADFTFVCPTEVSTAHKAWHDTSPVMVEGLALRGDNGIG   |
|      |          | 89345763  | gb  | ABD69956.1     | alkyl hydroperoxide reductase/ Thiol specific antioxidant   | <i>Rhodoferrax ferrireducens</i> T118                  |  |         |                                              |
| 1072 | 1.72E-15 | 50426789  | ref | XP_461992.1    | hypothetical protein DEHA06:1154g                           | <i>Debaryomyces hansenii</i> CBS767                    |  | group 1 | AFPLAFTFVCPTESSLAWTNVARDGGGLGVLLDGVVALRGVSS  |
|      |          | 4965762   | emb | CA60466.1      | unnamed protein product                                     | <i>Debaryomyces hansenii</i> CBS767                    |  |         |                                              |
| 1073 | 6.27E-16 | 69246516  | ref | YP_00603919.1  | Alkyl hydroperoxide reductase/ Thiol specific antioxidant   | <i>Enterococcus faecium</i> DO                         |  | group 2 | CFYPADFTFVCPTECSLTHKAWHDTSDVLDGLAQRGADGIG    |
|      |          | 68195246  | gb  | IEAN09700.1    | Alkyl hydroperoxide reductase/ Thiol specific antioxidant   | <i>Enterococcus faecium</i> DO                         |  |         |                                              |

| Hit# | p-value  | gi number     | db              | protein accession                                          | Name                                | Species         | Crosshits [subfamily (p-value)]               | Active Site Signature |
|------|----------|---------------|-----------------|------------------------------------------------------------|-------------------------------------|-----------------|-----------------------------------------------|-----------------------|
| 1    | 0        | 6646878.gb    | AAF2:1097.1     | mitochondrial peroxidase                                   | Dirofilaria immitis                 |                 | IGKDFSHPRDFTPVCTTELLSCDSSHHRKVVDDIALTAR       |                       |
| 2    | 1.14E-12 | 85093072.ref  | XP_959621.1     | mitochondrial peroxidoredoxin PRX1                         | Neurospora crassa OR74A             |                 | FSHPEDYTPVCTTELLSANSHEGWINDIASTGRLPKO         |                       |
| 3    | 0        | 28921066.gb   | EAA30385.1      | peroxidase                                                 | Neurospora crassa OR74A             |                 | IGKLFSPHPRDFTPVCTTELLSCDDHKWSESDVPLTCR        |                       |
| 4    | 6.71E-14 | 68348727.gb   | AAV96294.1      | putative peroxidoredoxin                                   | Arenicola marina                    | BCP (8.868E-09) | FAHPADFTPVCTSEFAHLAWVEAISATVRFVIDQEV          |                       |
| 5    | 0        | 58039044.ref  | YP_191008.1     | putative peroxidoredoxin                                   | Glucobacter oxydans 621H            |                 | QEOPTFHPADFTPVCTTELLSADSHGKWKDIPFTIR          |                       |
| 6    | 0        | 58001458.gb   | AAW60352.1      | putative peroxidoredoxin                                   | Glucobacter oxydans 621H            |                 | FSHPKNTFPVCTTELLSVDSSHAKWKGDINATVRQGED        |                       |
| 7    | 2.42E-15 | 86357421.ref  | BAE63787.1      | unnamed protein product                                    | Aspergillus oryzae                  |                 | QETVFSHPADFTPVCTTEMLSTDEHLKWIADVTAAR          |                       |
| 8    | 0        | 86281523.gb   | ABC90586.1      | probable anti-oxidant protein, AhpC/Tsa family             | Rhizobium ellipticum CFN 42         |                 | FSHPADFTPVCTTEFLSVDSHLAWRTTYGMIPLTIG          |                       |
| 9    | 0        | 39943569.ref  | NP_947785.1     | probable antioxidant protein                               | Rhizobium ellipticum CFN 42         |                 | FSHPADFTPVCTTEFLSVDSHLAWRTTYGMIPLTIG          |                       |
| 10   | 0        | 39649361.emb  | CAE27884.1      | probable antioxidant protein                               | Rhodopseudomonas palustris CGA009   |                 | FSHPADFTPVCTTEFLSVDSHLAWRTTYGMIPLTIG          |                       |
| 11   | 0        | 85715856.ref  | XP_01046834.1   | alkyl hydroperoxide reductase / Thiol specific antioxidant | Nitrobacter sp. Nb-311A             |                 | FSHPADFTPVCTTEFLSVDSHLAWRTTYGMIPLTIG          |                       |
| 12   | 0        | 85697263.gb   | EAO35143.1      | alkyl hydroperoxide reductase / Thiol specific antioxidant | Nitrobacter sp. Nb-311A             |                 | FSHPADFTPVCTTEFLSVDSHLAWRTTYGMIPLTIG          |                       |
| 13   | 0        | 109631648.gb  | ABG35998.1      | glutathione peroxidase                                     | Helianthus annuus                   |                 | FSHPADFTPVCTTEFLSVDSHLAWRTTYGMIPLTIG          |                       |
| 14   | 0        | 109631650.gb  | ABG35999.1      | glutathione peroxidase                                     | Helianthus annuus                   |                 | FSHPADFTPVCTTEFLSVDSHLAWRTTYGMIPLTIG          |                       |
| 15   | 0        | 86607615.ref  | YP_476377.1     | antioxidant, AhpC/Tsa family                               | Synechococcus sp. JA-2-3B/a(2-13)   |                 | FSHPADFTPVCTTEFLSVDSHLAWRTTYGMIPLTIG          |                       |
| 16   | 0        | 86556157.gb   | ABD01114.1      | antioxidant, AhpC/Tsa family                               | Synechococcus sp. JA-2-3B/a(2-13)   |                 | FSHPADFTPVCTTEFLSVDSHLAWRTTYGMIPLTIG          |                       |
| 17   | 0        | 75323225.sp   | Q8E226          | REHY_MEDTR 1-Cys peroxidoredoxin (Thioredoxin peroxidase)  | Medicago truncatula                 |                 | LEVDGKIFSHPGDFTPVCTTEFLSVDSHLAWRTTYGMIPLTIG   |                       |
| 18   | 0        | 49818729.gb   | AA167997.1      | 1-cys peroxidoredoxin                                      | Medicago truncatula                 |                 | LEVDGKIFSHPGDFTPVCTTEFLSVDSHLAWRTTYGMIPLTIG   |                       |
| 19   | 0        | 120436673.ref | YP_862559.1     | peroxidoredoxin                                            | Gramella forsetii KT0803            |                 | FSHPADFTPVCTTEFLSVDSHLAWRTTYGMIPLTIG          |                       |
| 20   | 0        | 117579023.emb | CAL67492.1      | peroxidoredoxin                                            | Gramella forsetii KT0803            |                 | FSHPADFTPVCTTEFLSVDSHLAWRTTYGMIPLTIG          |                       |
| 21   | 0        | 70983971.ref  | XP_747511.1     | AhpC/Tsa family thioredoxin peroxidase, putative           | Aspergillus fumigatus Af293         |                 | QEQPFSHPADFTPVCTTEFLSVDSHLAWRTTYGMIPLTIG      |                       |
| 22   | 0        | 66845137.gb   | EAL85473.1      | AhpC/Tsa family thioredoxin peroxidase, putative           | Aspergillus fumigatus Af293         |                 | QEQPFSHPADFTPVCTTEFLSVDSHLAWRTTYGMIPLTIG      |                       |
| 23   | 3.14E-15 | 162694617.gb  | EDQ80964.1      | predicted protein                                          | Physcomitrella patens subsp. patens |                 | FSHPADFTPVCTTEFLSVDSHLAWRTTYGMIPLTIG          |                       |
| 24   | 0        | 119720473.ref | YP_920968.1     | Peroxidase                                                 | Thermophilum pendens Hrk 5          |                 | FSHPADFTPVCTTEFLSVDSHLAWRTTYGMIPLTIG          |                       |
| 25   | 0        | 119525593.gb  | ABL78965.1      | 1-Cys peroxidoredoxin / 3-Cys thioredoxin peroxidase       | Thermophilum pendens Hrk 5          |                 | FSHPADFTPVCTTEFLSVDSHLAWRTTYGMIPLTIG          |                       |
| 26   | 0        | 163719330.ref | XP_02127255.1   | Peroxidoredoxin                                            | Thermoproteus neutrophilus V2451a   |                 | LGMKFSHPGDFTPVCTTEFLSVDSHLAWRTTYGMIPLTIG      |                       |
| 27   | 0        | 162425553.gb  | EDQ36101.1      | Peroxidoredoxin                                            | Thermoproteus neutrophilus V2451a   |                 | LGMKFSHPGDFTPVCTTEFLSVDSHLAWRTTYGMIPLTIG      |                       |
| 28   | 0        | 157757823.gb  | XP_001671255.1  | Hypothetical protein CBG01664                              | Caenorhabditis briggsae AF16        |                 | PGGVRILGKFPSPADFTPVCTTEFLSVDSHLAWRTTYGMIPLTIG |                       |
| 29   | 0        | 39587575.emb  | CAE58513.1      | Hypothetical protein CBG01664                              | Caenorhabditis briggsae             |                 | PGGVRILGKFPSPADFTPVCTTEFLSVDSHLAWRTTYGMIPLTIG |                       |
| 30   | 0        | 152986639.ref | YP_0013347061.1 | probable antioxidant protein                               | Pseudomonas aeruginosa PA7          |                 | FSHPADFTPVCTTEFLSVDSHLAWRTTYGMIPLTIG          |                       |
| 31   | 0        | 150961797.gb  | ABR83822.1      | probable antioxidant protein                               | Pseudomonas aeruginosa PA7          |                 | FSHPADFTPVCTTEFLSVDSHLAWRTTYGMIPLTIG          |                       |
| 32   | 0        | 12044361.gb   | AAG47822.1      | antioxidant, AhpC/Tsa family                               | Drosophila melanogaster             |                 | FSHPADFTPVCTTEFLSVDSHLAWRTTYGMIPLTIG          |                       |
| 33   | 0        | 57233665.ref  | YP_182278.1     | antioxidant, AhpC/Tsa family                               | Dehalococcoides ethenogenes 195     |                 | FSHPADFTPVCTTEFLSVDSHLAWRTTYGMIPLTIG          |                       |
| 34   | 0        | 57224113.gb   | AAW39170.1      | antioxidant, AhpC/Tsa family                               | Dehalococcoides ethenogenes 195     |                 | FSHPADFTPVCTTEFLSVDSHLAWRTTYGMIPLTIG          |                       |
| 35   | 0        | 148241485.ref | YP_001226642.1  | Peroxidoredoxin                                            | Synechococcus sp. RCC307            |                 | QLGDFSHPADYTPVCTTEFLSVDSHLAWRTTYGMIPLTIG      |                       |
| 36   | 0        | 147849795.emb | CAK27289.1      | Peroxidoredoxin                                            | Synechococcus sp. RCC307            |                 | QLGDFSHPADYTPVCTTEFLSVDSHLAWRTTYGMIPLTIG      |                       |
| 37   | 0        | 3334372.sp    | O33665          | TDXH2_SULME Probable peroxidoredoxin 2                     | Sulfolobus metallicus               |                 | FAHPADFTPVCTTEFLSVDSHLAWRTTYGMIPLTIG          |                       |
| 38   | 0        | 2257961.gb    | AAB63198.1      | alkyl hydroperoxide reductase/thiol-specific antioxidant h | Sulfolobus metallicus               |                 | FAHPADFTPVCTTEFLSVDSHLAWRTTYGMIPLTIG          |                       |
| 39   | 0        | 78189933.ref  | YP_380271.1     | peroxidoredoxin                                            | Chlorobium chlorochromatii Cab3     |                 | FSHPADFTPVCTTEFLSVDSHLAWRTTYGMIPLTIG          |                       |
| 40   | 0        | 78172132.gb   | ABB29228.1      | 3-Cys thioredoxin peroxidase / 1-Cys peroxidoredoxin       | Chlorobium chlorochromatii Cab3     |                 | FSHPADFTPVCTTEFLSVDSHLAWRTTYGMIPLTIG          |                       |
| 41   | 0        | 126008698.ref | XP_01709270.1   | hypothetical protein Faci_03000800                         | Ferroplasma acidimanus ter1         |                 | PEMDFSHPGDFTPVCTTEFLSVDSHLAWRTTYGMIPLTIG      |                       |
| 42   | 0        | 121531404.ref | XP_01664009.1   | Peroxidase                                                 | Ralstonia pickettii 12D             |                 | FSHPADFTPVCTTEFLSVDSHLAWRTTYGMIPLTIG          |                       |
| 43   | 0        | 153885968.ref | XP_02007124.1   | Peroxidase                                                 | Ralstonia pickettii 12D             |                 | FSHPADFTPVCTTEFLSVDSHLAWRTTYGMIPLTIG          |                       |
| 44   | 0        | 121301396.gb  | EAX42369.1      | Peroxidase                                                 | Ralstonia pickettii 12D             |                 | FSHPADFTPVCTTEFLSVDSHLAWRTTYGMIPLTIG          |                       |
| 45   | 0        | 151577890.gb  | EDN42290.1      | Peroxidase                                                 | Ralstonia pickettii 12D             |                 | FSHPADFTPVCTTEFLSVDSHLAWRTTYGMIPLTIG          |                       |
| 46   | 0        | 71065262.ref  | YP_263989.1     | putative alkyl hydroperoxide reductase                     | Psychrobacter arcticus 273-4        |                 | FSHPADFTPVCTTEFLSVDSHLAWRTTYGMIPLTIG          |                       |
| 47   | 0        | 1038247.gb    | AAZ18555.1      | 1-Cys peroxidoredoxin                                      | Psychrobacter arcticus 273-4        |                 | FSHPADFTPVCTTEFLSVDSHLAWRTTYGMIPLTIG          |                       |
| 48   | 0        | 109631596.gb  | ABG35972.1      | glutathione peroxidase                                     | Helianthus annuus                   |                 | FSHPADFTPVCTTEFLSVDSHLAWRTTYGMIPLTIG          |                       |
| 49   | 0        | 109631598.gb  | ABG35973.1      | glutathione peroxidase                                     | Helianthus annuus                   |                 | FSHPADFTPVCTTEFLSVDSHLAWRTTYGMIPLTIG          |                       |
| 50   | 0        | 84325747.ref  | XP_00973779.1   | COG0450: Peroxidoredoxin                                   | Pseudomonas aeruginosa 2192         |                 | FSHPADFTPVCTTEFLSVDSHLAWRTTYGMIPLTIG          |                       |
| 51   | 0        | 126195514.gb  | EAZ59577.1      | hypothetical protein PAZG_02865                            | Pseudomonas aeruginosa 2192         |                 | FSHPADFTPVCTTEFLSVDSHLAWRTTYGMIPLTIG          |                       |
| 52   | 7.83E-16 | 83954867.ref  | XP_009633545.1  | probable antioxidant protein                               | Sulfitobacter sp. NAS-14.1          |                 | FSHPADFTPVCTTEFLSVDSHLAWRTTYGMIPLTIG          |                       |
| 53   | 0        | 83940593.gb   | EAP79765.1      | probable antioxidant protein                               | Sulfitobacter sp. NAS-14.1          |                 | FSHPADFTPVCTTEFLSVDSHLAWRTTYGMIPLTIG          |                       |
| 54   | 0        | 55251344.emb  | CAH68896.1      | novel protein (zgc:73360)                                  | Danilo rerio                        |                 | FSHPADFTPVCTTEFLSVDSHLAWRTTYGMIPLTIG          |                       |
| 55   | 0        | 126359047.ref | XP_01716043.1   | Peroxidase                                                 | Pseudomonas putida GB-1             |                 | FSHPADFTPVCTTEFLSVDSHLAWRTTYGMIPLTIG          |                       |
| 56   | 0        | 126316292.gb  | EAZ67291.1      | Peroxidase                                                 | Pseudomonas putida GB-1             |                 | FSHPADFTPVCTTEFLSVDSHLAWRTTYGMIPLTIG          |                       |
| 57   | 0        | 148707369.gb  | EDI39316.1      | mCG9402, isoform CRA_b                                     | Mus musculus                        |                 | TTIGRFSPHPRDFTPVCTTEFLSVDSHLAWRTTYGMIPLTIG    |                       |
| 58   | 0        | 94313058.ref  | YP_586267.1     | alkyl hydroperoxide reductase / Thiol specific antioxidant | Ralstonia metallidurans CH34        |                 | EGKIFSHPKDFTPVCTTEFLSVDSHLAWRTTYGMIPLTIG      |                       |
| 59   | 0        | 93356910.gb   | ABF10938.1      | alkyl hydroperoxide reductase / Thiol specific antioxidant | Ralstonia metallidurans CH34        |                 | EGKIFSHPKDFTPVCTTEFLSVDSHLAWRTTYGMIPLTIG      |                       |
| 60   | 0        | 82703429.ref  | YP_412995.1     | Peroxidase                                                 | Nitrosospora multiformis ATCC 25196 |                 | FSHPADFTPVCTTEFLSVDSHLAWRTTYGMIPLTIG          |                       |
| 61   | 0        | 82411494.gb   | ABB75603.1      | 1-Cys peroxidoredoxin                                      | Nitrosospora multiformis ATCC 25196 |                 | FSHPADFTPVCTTEFLSVDSHLAWRTTYGMIPLTIG          |                       |
| 62   | 0        | 149374389.ref | XP_01892163.1   | antioxidant, AhpC/Tsa family protein                       | Mairiobacter algicola DG683         |                 | LGDFSHPADYTPVCTTEFLSVDSHLAWRTTYGMIPLTIG       |                       |

|    |          |               |                |                                                            |                                     |                                             |
|----|----------|---------------|----------------|------------------------------------------------------------|-------------------------------------|---------------------------------------------|
| 39 |          | 149361092.gb  | EDM49542.1     | antioxidant, AhpC/Tsa family protein                       | Mairinobacter algicola DG893        | FSHPADFTPVCITTEMLSDYGMLETAARVDPKPKKIRLI     |
|    | 0        | 86141477.ref  | ZP_01080023.1  | antioxidant, AhpC/TSA family protein                       | Flavobacterium sp. MED217           |                                             |
| 40 | 2.37E-16 | 853770396.gb  | EAQ050491.1    | antioxidant, AhpC/TSA family protein                       | Leeuwenhoekella blandensis MED217   | FSHPADFTPVCITTEMLSDYGMLETAARVDPKPKKIRLI     |
| 41 | 0        | 163778162.gb  | EQD091777.1    | predicted protein                                          | Monosiga brevicollis MX1            | FSHPADFTPVCITTEMLSDYGMLETAARVDPKPKKIRLI     |
| 42 | 0        | 77461637.ref  | YP_351144.1    | Peroxidase                                                 | Pseudomonas fluorescens PFO-1       | FSHPADFTPVCITTEFLSIDSHIAWIKRILKMDTQAVR      |
| 43 | 0        | 77385640.gb   | ABA77153.1     | 1-Cys peroxiredoxin                                        | Pseudomonas fluorescens PFO-1       |                                             |
| 44 | 2.40E-15 | 72395188.gb   | AAZ69461.1     | 3-Cys thioredoxin peroxidase                               | Meihausarcina bakeri str. Fusaro    | QERAFSHPDDFTPVCITTEFLSIDSHIAWIKRILKMDTQAVR  |
| 45 | 0        | 119415330.gb  | EAW25268.1     | antioxidant protein Lsfa                                   | Necosartorya fischeri NRRL 181      |                                             |
| 46 | 0        | 16373982.ref  | ZP_02147228.1  | Peroxidase                                                 | Neosartorya fischeri NRRL 181       | FSHPKDFTPVCITTEFLSIDSHIAWIKRILKMDTQAVR      |
| 47 | 0        | 161386855.gb  | EDQ11217.1     | Peroxidase                                                 | Phaeobacter gallaeciensis BS107     | LSIGFSHPKDFTPVCITTEFLSIDSHIAWIKRILKMDTQAVR  |
| 48 | 0        | 85716147.ref  | ZP_01047122.1  | alkyl hydroperoxide reductase/ Thiol specific antioxidant/ | Phaeobacter gallaeciensis BS107     |                                             |
| 49 | 0        | 85696980.gb   | EAQ34863.1     | alkyl hydroperoxide reductase/ Thiol specific antioxidant/ | Nitrobacter sp. Nb-311A             | FSHPKDFTPVCITTEFLSIDSHIAWIKRILKMDTQAVR      |
| 50 | 0        | 126726063.ref | ZP_01741907.1  | hypothetical protein RB2150_07663                          | Rhodobacteriales bacterium HTCC2150 | FSHPKDFTPVCITTEFLSIDSHIAWIKRILKMDTQAVR      |
| 51 | 0        | 126705289.gb  | EBA04360.1     | hypothetical protein RB2150_07663                          | Rhodobacteriales bacterium HTCC2150 | FSHPKDFTPVCITTEFLSIDSHIAWIKRILKMDTQAVR      |
| 52 | 0        | 145955186.ref | ZP_01804190.1  | hypothetical protein CidJF_04001599                        | Clostridium difficile QCD-32958     | FSHPKDFTPVCITTEFLSIDSHIAWIKRILKMDTQAVR      |
| 53 | 4.01E-20 | 156082215.ref | XP_001608596.1 | 1-cys peroxidoxin, putative                                | Plasmodium vivax Sat-1              | FSHPKDFTPVCITTEFLSIDSHIAWIKRILKMDTQAVR      |
| 54 | 0        | 148801535.gb  | EDL42934.1     | 1-cys peroxidoxin, putative                                | Plasmodium vivax                    | FSHPKDFTPVCITTEFLSIDSHIAWIKRILKMDTQAVR      |
| 55 | 0        | 150021081.ref | YP_001308435.1 | Peroxiredoxin                                              | Thermosiphon melanesiensis BK429    | QLGDFSHPADFTPVCITTEFLSIDSHIAWIKRILKMDTQAVR  |
| 56 | 0        | 149793602.gb  | ABR31050.1     | Peroxiredoxin                                              | Thermosiphon melanesiensis BK429    | FEADFSPHDDFTPVCITTEFLSIDSHIAWIKRILKMDTQAVR  |
| 57 | 3.19E-15 | 108874897.gb  | EAI139122.1    | peroxiredoxin 6, prx-6                                     | Aedes aegypti                       | TTTLRFSPHDDFTPVCITTEFLSIDSHIAWIKRILKMDTQAVR |
| 58 | 0        | 50545407.ref  | XP_500241.1    | hypothetical protein                                       | Aedes aegypti                       | FSHPADFTPVCITTEFLSIDSHIAWIKRILKMDTQAVR      |
| 59 | 0        | 49646108.emb  | CAG84179.1     | unnamed protein product                                    | Yarrowia lipolytica                 | FSHPADFTPVCITTEFLSIDSHIAWIKRILKMDTQAVR      |
| 60 | 1.06E-15 | 126138146.ref | XP_001385596.1 | hypothetical protein PICST_73480                           | Yarrowia lipolytica CL1B122         | FSHPADFTPVCITTEFLSIDSHIAWIKRILKMDTQAVR      |
| 61 | 0        | 126092874.gb  | ABN67587.1     | predicted protein                                          | Pichia stipitis CBS 6054            | FSHPADFTPVCITTEFLSIDSHIAWIKRILKMDTQAVR      |
| 62 | 0        | 17231896.ref  | NP_488444.1    | AhpC/TSA family protein                                    | Nostoc sp. PCC 7120                 | FSHPADFTPVCITTEFLSIDSHIAWIKRILKMDTQAVR      |
| 63 | 0        | 17133540.djv  | BAB76103.1     | AhpC/TSA family protein                                    | Nostoc sp. PCC 7120                 | FSHPADFTPVCITTEFLSIDSHIAWIKRILKMDTQAVR      |
| 64 | 0        | 6319407.ref   | NP_009489.1    | Mitochondrial peroxiredoxin (1-Cys Prx) with thioresdoxin  | Saccharomyces cerevisiae            | QLKRFSPHDDFTPVCITTEFLSIDSHIAWIKRILKMDTQAVR  |
| 65 | 0        | 465521.sp     | P34227         | PRX1_YEAST Mitochondrial peroxiredoxin PRX1 (Thioredoxin)  | Saccharomyces cerevisiae            |                                             |
| 66 | 0        | 313735.emb    | CAA80784.1     | YBL0524                                                    | Saccharomyces cerevisiae            |                                             |
| 67 | 0        | 536101.emb    | CAA84884.1     | unnamed protein product                                    | Saccharomyces cerevisiae            |                                             |
| 68 | 0        | 151946332.gb  | EDN64554.1     | peroxiredoxin                                              | Saccharomyces cerevisiae YJM789     | FSHPADFTPVCITTEFLSIDSHIAWIKRILKMDTQAVR      |
| 69 | 0        | 48477449.ref  | YP_023155.1    | putative peroxiredoxin                                     | Picrophilus torridus DSM 9790       | FSHPADFTPVCITTEFLSIDSHIAWIKRILKMDTQAVR      |
| 70 | 0        | 56749759.sp   | Q6L240         | TDXH1_PICTO Probable peroxiredoxin 1                       | Picrophilus torridus DSM 9790       | FSHPADFTPVCITTEFLSIDSHIAWIKRILKMDTQAVR      |
| 71 | 0        | 48430097.gb   | AA142962.1     | hypothetical alkyl hydroperoxide reductase                 | Picrophilus torridus DSM 9790       | FSHPADFTPVCITTEFLSIDSHIAWIKRILKMDTQAVR      |
| 72 | 0        | 24652436.ref  | NP_610584.2    | CG12896 CG12896-PA, isoform A                              | Drosophila melanogaster             | FSHPADFTPVCITTEFLSIDSHIAWIKRILKMDTQAVR      |
| 73 | 0        | 21627530.gb   | AAF58796.2     | CG12896-PA                                                 | Drosophila melanogaster             | FSHPADFTPVCITTEFLSIDSHIAWIKRILKMDTQAVR      |
| 74 | 0        | 15606208.ref  | NP_213585.1    | alkyl hydroperoxide reductase                              | Aquifex aeolicus VF5                | FSHPADFTPVCITTEFLSIDSHIAWIKRILKMDTQAVR      |
| 75 | 0        | 14285789.sp   | O67024         | TDXH_AQUAE Probable peroxiredoxin                          | Aquifex aeolicus VF5                | FSHPADFTPVCITTEFLSIDSHIAWIKRILKMDTQAVR      |
| 76 | 0        | 2983402.gb    | AAC06896.1     | alkyl hydroperoxide reductase                              | Aquifex aeolicus VF5                | FSHPADFTPVCITTEFLSIDSHIAWIKRILKMDTQAVR      |
| 77 | 0        | 12247762.gb   | AAG50024.1     | AF-327046_1 1-Cys peroxiredoxin                            | Triticum turgidum subsp. durum      | FSHPADFTPVCITTEFLSIDSHIAWIKRILKMDTQAVR      |
| 78 | 1.66E-15 | 50424391.ref  | XP_460782.1    | hypothetical protein DEHA0F10593g                          | Debaromyces hansenii CBS767         | FSHPADFTPVCITTEFLSIDSHIAWIKRILKMDTQAVR      |
| 79 | 0        | 49656451.emb  | CAG89123.1     | unnamed protein product                                    | Debaromyces hansenii CBS767         | FSHPADFTPVCITTEFLSIDSHIAWIKRILKMDTQAVR      |
| 80 | 0        | 114765512.ref | ZP_01444620.1  | Alkyl hydroperoxide reductase/ Thiol specific antioxidant/ | Roseovarius sp. HTCC2801            | YSHPADFTPVCITTEFLSIDSHIAWIKRILKMDTQAVR      |
| 81 | 0        | 114542105.gb  | EAU45137.1     | Alkyl hydroperoxide reductase/ Thiol specific antioxidant/ | Roseovarius sp. HTCC2801            |                                             |
| 82 | 3.56E-15 | 77164811.ref  | YP_343336.1    | Peroxidase                                                 | Nitrosococcus oceanii ATCC 19707    | YSHPADFTPVCITTEFLSIDSHIAWIKRILKMDTQAVR      |
| 83 | 3.71E-13 | 76883125.gb   | ABA57806.1     | 1-Cys peroxiredoxin                                        | Nitrosococcus oceanii ATCC 19707    | FSHPADFTPVCITTEFLSIDSHIAWIKRILKMDTQAVR      |
| 84 | 0        | 67522471.ref  | XP_659296.1    | hypothetical protein AN1692.2                              | Aspergillus nidulans FGSC A4        | FSHPADFTPVCITTEFLSIDSHIAWIKRILKMDTQAVR      |
| 85 | 0        | 40745656.gb   | EAA64812.1     | hypothetical protein AN1692.2                              | Aspergillus nidulans FGSC A4        | FSHPADFTPVCITTEFLSIDSHIAWIKRILKMDTQAVR      |
| 86 | 0        | 116684140.gb  | ABK06389.1     | peroxiredoxin 6-related sequence 1                         | Mus famulus                         | FSHPADFTPVCITTEFLSIDSHIAWIKRILKMDTQAVR      |
| 87 | 0        | 119898954.ref | YP_934167.1    | conserved hypothetical peroxiredoxin                       | Azoarcus sp. BH72                   | FSHPADFTPVCITTEFLSIDSHIAWIKRILKMDTQAVR      |
| 88 | 0        | 119671367.emb | CAL95280.1     | conserved hypothetical peroxiredoxin                       | Azoarcus sp. BH72                   | FSHPADFTPVCITTEFLSIDSHIAWIKRILKMDTQAVR      |
| 89 | 2.10E-13 | 11139253.gb   | AAG31645.1     | AF312927_1 putative thiol-specific antioxidant protein 1   | Ajeilomyces capsulatus              | FSHPADFTPVCITTEFLSIDSHIAWIKRILKMDTQAVR      |
| 90 | 0        | 14161441.gb   | AAK54753.1     | AF372618_1 thiol-specific antioxidant                      | Ajeilomyces capsulatus              | FSHPADFTPVCITTEFLSIDSHIAWIKRILKMDTQAVR      |
| 91 | 0        | 149707887.ref | XP_001496882.1 | PREDICTED: similar to non-selenium glutathione phospho     | Equus caballus                      | FSHPADFTPVCITTEFLSIDSHIAWIKRILKMDTQAVR      |
| 92 | 0        | 67154640.ref  | ZP_00416385.1  | Peroxidase                                                 | Equus caballus                      | FSHPADFTPVCITTEFLSIDSHIAWIKRILKMDTQAVR      |
| 93 | 0        | 67088775.gb   | EAM08239.1     | Peroxidase                                                 | Azotobacter vinelandii AVOP         | FSHPADFTPVCITTEFLSIDSHIAWIKRILKMDTQAVR      |
| 94 | 0        | 146280610.ref | YP_001170763.1 | antioxidant protein Lsfa                                   | Azotobacter vinelandii AVOP         | FSHPADFTPVCITTEFLSIDSHIAWIKRILKMDTQAVR      |
| 95 | 0        | 145568815.gb  | ABP77921.1     | antioxidant protein Lsfa                                   | Pseudomonas stutzeri A1501          | FSHPADFTPVCITTEFLSIDSHIAWIKRILKMDTQAVR      |
| 96 | 0        | 37958851.gb   | AAP51115.1     | putative antioxidant peroxidase                            | Pseudomonas stutzeri A1501          | FSHPADFTPVCITTEFLSIDSHIAWIKRILKMDTQAVR      |
| 97 | 0        | 85704748.ref  | ZP_01035849.1  | thiol-specific antioxidant protein                         | uncultured bacterium                | FSHPADFTPVCITTEFLSIDSHIAWIKRILKMDTQAVR      |
| 98 | 0        | 85670566.gb   | EAQ25426.1     | thiol-specific antioxidant protein                         | Roseovarius sp. 217                 | FSHPADFTPVCITTEFLSIDSHIAWIKRILKMDTQAVR      |
| 99 | 0        |               |                |                                                            | Roseovarius sp. 217                 |                                             |



|     |          |               |                |                                                                                      |                                                        |                                         |
|-----|----------|---------------|----------------|--------------------------------------------------------------------------------------|--------------------------------------------------------|-----------------------------------------|
| 73  | 0        | 21239416.gb   | AAM44290.1     | AF510851_1 glutathione peroxidase                                                    | <i>Aplysia californica</i>                             | FSHPADYTPVCTITELSCDSSHVGKVDLGMPLTAR     |
| 74  | 0        | 91082163.ref  | XP_070660.1    | PREDICTED: similar to CG3083-PA putative bifunctional protein: peroxidoxin/chitinase | <i>Tribolium castaneum</i>                             | FSHPADYTPVCTITELSCDTHKKWLNIDIDEKDLPTAR  |
| 75  | 0        | 126939037.ref | YP_001087934.1 | putative bifunctional protein: peroxidoxin/chitinase                                 | <i>Clostridium difficile</i> 630                       | FSHPGDFTPVCTITELSVDSLAWMYNITSYVROLLD    |
| 76  | 2.38E-14 | 150377081.ref | CAJ68298.1     | peroxidase                                                                           | <i>Clostridium difficile</i> 630                       | FSHPKNTFPVCTITELSVDSHTKWKNDIQLTARQGGD   |
| 77  | 0        | 150031629.gb  | YP_001313677.1 | Peroxidase                                                                           | <i>Sinorhizobium medicae</i> WSM419                    | FSHPGDFTPVCTITELSCDSSHKEWIKDKKKASTGR    |
| 78  | 1.27E-15 | 109631674.gb  | ABR63744.1     | glutathione peroxidase                                                               | <i>Sinorhizobium medicae</i> WSM419                    | FSHPGDFTPVCTITELSCDSSHKEWIKDKKKASTGR    |
| 79  | 1.76E-19 | 114051564.ref | NP_001040104.1 | glutathione peroxidase                                                               | <i>Helianthus annuus</i>                               | LKGFSPSDFTPVCTITELSCDSSHLEWCKDIPLTAR    |
| 80  | 0        | 15039244.ref  | ABD36089.1     | glutathione peroxidase                                                               | <i>Helianthus annuus</i>                               | SSHPRDFTVCTITELSIDDLHLSKDIKAEKDPETSR    |
| 81  | 0        | 14521246.ref  | XP_001252820.1 | PREDICTED: similar to non-selenium glutathione phosphoperoxidase                     | <i>Bos taurus</i>                                      | FSHPGDFTPVCTITELSIDSHIKWVEWILGMITGTR    |
| 82  | 0        | 14285793.sp   | NP_126721.1    | alkyl hydroperoxide reductase/Thiol specific antioxidant/ peroxidoxin                | <i>Methanococcus vannielii</i> SB                      | QGKWFSPADFTPVCTITELSVDAHKWMEWITITAR     |
| 83  | 0        | 19423862.gb   | Q8UZY4         | TDXH_PYRAB Probable peroxidoxin                                                      | <i>Pyrococcus abyssi</i> GE5                           | LELDFSHPGDFTPVCTITELSCDSSHKEWIKDIASSTGR |
| 84  | 7.52E-16 | 86141074.ref  | CAB48952.1     | Peroxidoxin                                                                          | <i>Pyrococcus abyssi</i> GE5                           | FSHPKDFTPVCTITELSVDKHQAQWAEIDINGTVRQGGD |
| 85  | 0        | 161825740.ref | AA188710.1     | Thioredoxin peroxidase (AhpC, Alkyl hydroperoxide reductase)                         | <i>Bradyrhizobium</i> sp. BTA11                        | FSHPADYTPVCTITELSVDSHKEWIKDIKATVRIGPD   |
| 86  | 0        | 126665488.ref | YP_001059633.1 | rehydridin                                                                           | <i>Bradyrhizobium</i> sp. BTA11                        | FSHPADYTPVCTITELSVDSHKEWIKDIKATVRIGPD   |
| 87  | 2.43E-12 | 85710905.ref  | EAQ51465.1     | Peroxidase                                                                           | <i>Leeuwenhoekella blandensis</i> MED217               | FSHPADYTPVCTITELKLDLSVDSHKGWINDITLTVR   |
| 88  | 0        | 90423426.ref  | YP_001580752.1 | Peroxidase                                                                           | <i>Burkholderia multivorans</i> ATCC 17616             | FSHPADYTPVCTITELSVDSHHDWIKDITLTVRQLTD   |
| 89  | 0        | 16081592.ref  | ABX16255.1     | Peroxidase                                                                           | <i>Burkholderia multivorans</i> ATCC 17616             | FSHPADYTPVCTITELSVDSHHDWIKDITLTVRQLTD   |
| 90  | 0        | 146304289.ref | YP_001736470.1 | antioxidant protein LsfA                                                             | <i>Mairiobacter</i> sp. ELB17                          | QKGFSPADYTPVCTITEMTVDAHKGWITATVRFID     |
| 91  | 0        | 157127965.ref | EBA00732.1     | Peroxidoxin, AhpC/Tsa family protein                                                 | <i>Mairiobacter</i> sp. ELB17                          | FSHPADYTPVCTITELSVDSHKEWIKDIKATVRIGPD   |
| 92  | 0        | 57640472.ref  | YP_001191966.1 | Peroxidoxin, AhpC/Tsa family protein                                                 | <i>Idiomarina baltica</i> OS145                        | FSHPADYTPVCTITELSVDSHKEWIKDIKATVRIGPD   |
| 93  | 0        | 57158796.gb   | EAQ33246.1     | Peroxidase                                                                           | <i>Idiomarina baltica</i> OS145                        | FSHPADYTPVCTITELSVDSHKEWIKDIKATVRIGPD   |
| 94  | 5.18E-18 | 94371589.ref  | YP_531796.1    | 1-Cys peroxidoxin                                                                    | <i>Rhodopseudomonas palustris</i> BisB18               | FSHPADYTPVCTITELSVDSHKEWIKDIKATVRIGPD   |
| 95  | 0        | 146302744.ref | ABD87477.1     | putative peroxidoxin                                                                 | <i>Rhodopseudomonas palustris</i> BisB18               | FSHPADYTPVCTITELSVDSHKEWIKDIKATVRIGPD   |
| 96  | 0        | 23126633.ref  | NP_393951.1    | peroxidoxin related protein                                                          | <i>Thermoplasma acidophilum</i> DSM 1728               | FSHPADYTPVCTITELSVDSHKEWIKDIKATVRIGPD   |
| 97  | 0        | 150402347.ref | CAC11615.1     | putative peroxidoxin                                                                 | <i>Thermoplasma acidophilum</i>                        | FAHPADFTPVCTITELFEKLLSVDSHIAWLDIGLTVR   |
| 98  | 2.41E-18 | 150033377.gb  | YP_001191605.1 | 1-Cys peroxidoxin                                                                    | <i>Metatlospheara sedula</i> DSM 534                   | FSHPADFTPVCTITELFEKLLSVDSHIAWLDIGLTVR   |
| 99  | 0        | 146157162.gb  | ABP95681.1     | peroxidoxin 6, prx-6                                                                 | <i>Metatlospheara sedula</i> DSM 5348                  | FSHPADFTPVCTITELHSVDCHVDVNDIFGMLAQTVR   |
| 100 | 0        | 148545506.ref | YP_001661250.1 | peroxidoxin 6, prx-6                                                                 | <i>Aedes aegypti</i>                                   | FSHPADFTPVCTITELHSVDCHVDVNDIFGMLAQTVR   |
| 101 | 0        | 150402347.ref | EAT146535.1    | putative peroxidoxin                                                                 | <i>Aedes aegypti</i>                                   | FSHPADFTPVCTITELHSVDCHVDVNDIFGMLAQTVR   |
| 102 | 0        | 150402347.ref | YP_182950.1    | putative peroxidoxin                                                                 | <i>Thermococcus kodakarensis</i> KO BCP (1.413E-09)    | QKGFSPADFTPVCTITELSVDSHSHKMMEWITITAR    |
| 103 | 0        | 150402347.ref | Q5JF30         | TDXH_PYRKO Probable peroxidoxin                                                      | <i>Thermococcus kodakarensis</i> KOD1                  | FSHPADFTPVCTITELSVDSHSHKMMEWITITAR      |
| 104 | 0        | 66048101.ref  | BAD84726.1     | Peroxidase                                                                           | <i>Thermococcus kodakarensis</i> KOD1                  | FSHPADFTPVCTITELSVDSHSHKMMEWITITAR      |
| 105 | 0        | 63258808.gb   | AA939904.1     | Peroxidase                                                                           | <i>Pseudomonas syringae</i> pv. syring BCP (8.076E-09) | FSHPADFTPVCTITELSVDSHSHKMMEWITITAR      |
| 106 | 0        | 94371589.ref  | XP_001000802.1 | PREDICTED: peroxidoxin 6, related sequence 2                                         | <i>Pseudomonas syringae</i> pv. syringae B728a         | FSHPADFTPVCTITELSVDSHSHKMMEWITITAR      |
| 107 | 0        | 94371589.ref  | XP_357368.4    | PREDICTED: peroxidoxin 6, related sequence 2                                         | <i>Mus musculus</i>                                    | FSHPADFTPVCTITELSVDSHSHKMMEWITITAR      |
| 108 | 0        | 146157162.gb  | YP_001197336.1 | Peroxidase                                                                           | <i>Mus musculus</i>                                    | FSHPADFTPVCTITELSVDSHSHKMMEWITITAR      |
| 109 | 0        | 23126633.ref  | ABQ08016.1     | Peroxidase                                                                           | <i>Flavobacterium johnsoniae</i> UW101                 | FSHPADFTPVCTITELSVDSHSHKMMEWITITAR      |
| 110 | 0        | 150402347.ref | YP_001329641.1 | peroxidoxin                                                                          | <i>Flavobacterium johnsoniae</i> UW101                 | FSHPADFTPVCTITELSVDSHSHKMMEWITITAR      |
| 111 | 0        | 150403675.ref | YP_001330969.1 | peroxidoxin                                                                          | <i>Nostoc punctiforme</i> PCC 73102                    | FSHPADFTPVCTITELSVDSHSHKMMEWITITAR      |
| 112 | 0        | 150033377.gb  | ABR65490.1     | alkyl hydroperoxide reductase/Thiol specific antioxidant/                            | <i>Methanococcus maripaludis</i> C7                    | FSHPADFTPVCTITELSVDSHSHKMMEWITITAR      |
| 113 | 0        | 150033705.gb  | ABR6618.1      | alkyl hydroperoxide reductase/Thiol specific antioxidant/                            | <i>Methanococcus maripaludis</i> C7                    | FSHPADFTPVCTITELSVDSHSHKMMEWITITAR      |
| 114 | 0        | 71042808.pdb  | 2CV4           | A Chain A, Crystal Structure Of An Archaean Peroxidoxin                              | <i>Methanococcus maripaludis</i> C7                    | FSHPADFTPVCTITELSVDSHSHKMMEWITITAR      |
| 115 | 0        | 71042807.pdb  | 2CV4           | B Chain B, Crystal Structure Of An Archaean Peroxidoxin                              | <i>Methanococcus maripaludis</i> C7                    | FSHPADFTPVCTITELSVDSHSHKMMEWITITAR      |
| 116 | 0        | 71042808.pdb  | 2CV4           | C Chain C, Crystal Structure Of An Archaean Peroxidoxin                              | <i>Methanococcus maripaludis</i> C7                    | FSHPADFTPVCTITELSVDSHSHKMMEWITITAR      |
| 117 | 0        | 71042809.pdb  | 2CV4           | D Chain D, Crystal Structure Of An Archaean Peroxidoxin                              | <i>Methanococcus maripaludis</i> C7                    | FSHPADFTPVCTITELSVDSHSHKMMEWITITAR      |
| 118 | 0        | 71042810.pdb  | 2CV4           | E Chain E, Crystal Structure Of An Archaean Peroxidoxin                              | <i>Methanococcus maripaludis</i> C7                    | FSHPADFTPVCTITELSVDSHSHKMMEWITITAR      |
| 119 | 0        | 71042811.pdb  | 2CV4           | F Chain F, Crystal Structure Of An Archaean Peroxidoxin                              | <i>Methanococcus maripaludis</i> C7                    | FSHPADFTPVCTITELSVDSHSHKMMEWITITAR      |
| 120 | 0        | 71042812.pdb  | 2CV4           | G Chain G, Crystal Structure Of An Archaean Peroxidoxin                              | <i>Methanococcus maripaludis</i> C7                    | FSHPADFTPVCTITELSVDSHSHKMMEWITITAR      |
| 121 | 0        | 71042813.pdb  | 2CV4           | H Chain H, Crystal Structure Of An Archaean Peroxidoxin                              | <i>Methanococcus maripaludis</i> C7                    | FSHPADFTPVCTITELSVDSHSHKMMEWITITAR      |
| 122 | 0        | 71042814.pdb  | 2CV4           | I Chain I, Crystal Structure Of An Archaean Peroxidoxin                              | <i>Methanococcus maripaludis</i> C7                    | FSHPADFTPVCTITELSVDSHSHKMMEWITITAR      |
| 123 | 0        | 71042815.pdb  | 2CV4           | J Chain J, Crystal Structure Of An Archaean Peroxidoxin                              | <i>Methanococcus maripaludis</i> C7                    | FSHPADFTPVCTITELSVDSHSHKMMEWITITAR      |
| 124 | 0        | 26986978.ref  | NP_742403.1    | antioxidant protein LsfA                                                             | <i>Pseudomonas putida</i> KT2440                       | FSHPADFTPVCTITELKLDLSVDSHSHKMMEWITITAR  |
| 125 | 0        | 24981593.gb   | AA165887.1     | antioxidant protein LsfA                                                             | <i>Pseudomonas putida</i> KT2440                       | FSHPADFTPVCTITELKLDLSVDSHSHKMMEWITITAR  |
| 126 | 0        | 148509564.gb  | ABQ76424.1     | 1-Cys peroxidoxin                                                                    | <i>Pseudomonas putida</i> F1                           | FSHPADFTPVCTITELKLDLSVDSHSHKMMEWITITAR  |
| 127 | 0        | 126664847.ref | YP_01735831.1  | antioxidant, AhpC/Tsa family protein                                                 | <i>Mairiobacter</i> sp. ELB17                          | FSHPADYTPVCTITELSVDSHNDWAKDIKLTVRQGGD   |

|     |          |               |                |                                                                             |                                        |                                             |
|-----|----------|---------------|----------------|-----------------------------------------------------------------------------|----------------------------------------|---------------------------------------------|
| 101 | 0        | 126631173 gb  | EBA01787.1     | antioxidant_AhpC/Tsa family protein                                         | Mairinobacter sp. ELB17                | FSHPADFTPVCITTEFLSVDSHIAWVRNVTETVRQEMA      |
|     |          | 147669967 ref | YP_001214785.1 | Peroxiredoxin                                                               | Dehalococcoides sp. BAV1               |                                             |
| 102 | 9.84E-20 | 146270919 gb  | ABQ17907.1     | 3-Cys thioredoxin peroxidase                                                | Dehalococcoides sp. BAV1               | FSHPRDYTPVCITTEFLSVDSHIAWVRNVTETVRQEMA      |
|     |          | 147902026 ref | NP_001082669.1 | hypothetical protein LOC398641                                              | Xenopus laevis                         |                                             |
| 103 | 0        | 32450305 gb   | AAH54309.1     | MGC64582 protein                                                            | Xenopus laevis                         | FSHPRDFTPVCITTEFFEKRSVDDHGKWKADISATVR       |
|     |          | 69935523 ref  | XP_00630459.1  | Peroxidase                                                                  | Paracoccus denitrificans PD1222        |                                             |
|     |          | 119385480 ref | YP_916536.1    | Peroxidase                                                                  | Paracoccus denitrificans PD1222        |                                             |
| 104 | 0        | 119375247 gb  | ABL70840.1     | 1-Cys peroxiredoxin                                                         | Paracoccus denitrificans PD1222        | FSHPADFTPVCITTEFLSVDHSHKWKIDIDEKDLTAA       |
|     |          | 115473619 ref | NP_001060408.1 | OS07g0638400                                                                | Onyza sativa (japonica cultivar-group) |                                             |
|     |          | 158517779 sp  | POC5D1         | REHYB_ORYSJ1-Cys peroxiredoxin B (1-Cys Prx B) (Thiol-specific antioxidant) | Onyza sativa (japonica cultivar-group) |                                             |
|     |          | 27261085 dbj  | BAC45198.1     | putative RAB24 protein                                                      | Onyza sativa (japonica cultivar-group) |                                             |
|     |          | 113611944 dbj | BAF22322.1     | Os07g0638400                                                                | Onyza sativa (japonica cultivar-group) |                                             |
|     |          | 125601239 gb  | EAZ40815.1     | hypothetical protein OsJ_024298                                             | Onyza sativa (japonica cultivar-group) |                                             |
| 105 | 0        | 163745454 ref | ZP_02152814.1  | antioxidant_AhpC/Tsa family, putative                                       | Oceanibulbus indolifex HEL-45          | FSHPKDFTPVCITTEFISVDEHKKWKGDISATVRQLKL      |
|     |          | 161382272 gb  | EDQ06681.1     | antioxidant_AhpC/Tsa family, putative                                       | Oceanibulbus indolifex HEL-45          |                                             |
| 106 | 0        | 149246165 ref | XP_001527562.1 | mitochondrial peroxiredoxin PRX1                                            | Lodderomyces elongisporus NRRL YB-4239 | FSHPADYTPVCITTEFLSVDHSHKWKIDIDEKDLTAA       |
|     |          | 146447506 gb  | EDK41894.1     | mitochondrial peroxiredoxin PRX1                                            | Lodderomyces elongisporus NRRL YB-4239 |                                             |
| 107 | 0        | 93005497 ref  | YP_579934.1    | Peroxidase                                                                  | Psychrobacter cryohalobentis K5        | FSHPADFTPVCITTEFLSVDHSHKWKIDIDEKDLTAA       |
|     |          | 92393175 gb   | ABE74450.1     | 1-Cys peroxiredoxin                                                         | Psychrobacter cryohalobentis K5        |                                             |
| 108 | 0        | 119487778 ref | ZP_01621287.1  | alkyl hydroperoxide reductase/Thiol specific antioxidant                    | Lytngbya sp. PCC 8106                  | FSHPADYTPVCITTEFLSVDHSHKWKIDIDEKDLTAA       |
|     |          | 119455611 gb  | EAW36748.1     | alkyl hydroperoxide reductase/Thiol specific antioxidant                    | Lytngbya sp. PCC 8106                  |                                             |
| 109 | 0        | 157336227 emb | CAO70912.1     | unnamed protein product                                                     | Vitis vinifera                         | GLTLGFSDHPGDFTPVCITTEFLSVDHSHKWKIDIDEKDLTAA |
|     |          | 84667749 gb   | EAQ14217.1     | thiol-specific antioxidant protein                                          | Rhodobacteriales bacterium HTC22654    | FSHPKDFTPVCITTEFLSVDHSHKWKIDIDEKDLTAA       |
|     |          | 118594228 ref | ZP_01561573.1  | rehydrin                                                                    | Rhodobacteriales bacterium HTC22654    |                                             |
|     |          | 118440004 gb  | EAV46631.1     | rehydrin                                                                    | Methylophilales bacterium HTCC2181     | OQKFFSHPADFTPVCITTEFLSVDHSHKWKIDIDEKDLTAA   |
| 112 | 0        | 83951265 ref  | ZP_00959998.1  | thiol-specific antioxidant protein                                          | Methylophilales bacterium HTCC2181     | FSHPKDFTPVCITTEFLSVDHSHKWKIDIDEKDLTAA       |
|     |          | 83839164 gb   | EAP78460.1     | thiol-specific antioxidant protein                                          | Roseovarius nubinhibens ISM            |                                             |
| 113 | 0        | 1710079 sp    | P52571         | REHY_BROSE Probable 1-Cys peroxiredoxin (Thioredoxin ORF)                   | Bromus secalinus                       | FSHPGDFTPVCITTEFLSVDHSHKWKIDIDEKDLTAA       |
|     |          | 17932 emb     | CAA44884.1     | ORF                                                                         | Bromus secalinus                       |                                             |
| 114 | 0        | 152989769 ref | YP_001356491.1 | alkyl hydroperoxide reductase                                               | Nitratiruptor sp. SB155-2              | NEKLFSPADFTPVCITTEFLSVDHSHKWKIDIDEKDLTAA    |
|     |          | 151421630 dbj | BAF69134.1     | alkyl hydroperoxide reductase                                               | Nitratiruptor sp. SB155-2              |                                             |
| 115 | 0        | 116501810 gb  | EAU84705.1     | hypothetical protein CC1G_00224                                             | Coprinopsis cinerea okayama#130        | FSHPGDFTPVCITTEFLSVDHSHKWKIDIDEKDLTAA       |
|     |          | 134096292 ref | YP_001101367.1 | putative peroxiredoxin                                                      | Herminiomonas arsenicoxydians          | FSHPADFTPVCITTEFLSVDHSHKWKIDIDEKDLTAA       |
|     |          | 133740195 emb | CAL63246.1     | putative peroxiredoxin                                                      | Herminiomonas arsenicoxydians          |                                             |
| 117 | 0        | 118592466 ref | ZP_01549657.1  | alkyl hydroperoxide reductase/Thiol specific antioxidant                    | Stappia aggregata IAM 12614            | FSHPADFTPVCITTEFLSVDHSHKWKIDIDEKDLTAA       |
|     |          | 118434813 gb  | EAV41463.1     | alkyl hydroperoxide reductase/Thiol specific antioxidant                    | Stappia aggregata IAM 12614            |                                             |
| 118 | 0        | 85708213 ref  | ZP_01039279.1  | alkyl hydroperoxide reductase/Thiol specific antioxidant                    | Erythrobracter sp. NAP1                | FSHPADFTPVCITTEFLSVDHSHKWKIDIDEKDLTAA       |
|     |          | 85689747 gb   | EAG29750.1     | alkyl hydroperoxide reductase/Thiol specific antioxidant                    | Erythrobracter sp. NAP1                |                                             |
| 119 | 0        | 45358737 ref  | NP_988294.1    | peroxiredoxin                                                               | Methanococcus maripaludis S2           | FSHPGDFTPVCITTEFLSVDHSHKWKIDIDEKDLTAA       |
|     |          | 56749760 sp   | Q6L.Y19        | TDXH_ME1MP Probable peroxiredoxin                                           | Methanococcus maripaludis S2           |                                             |
|     |          | 45047603 emb  | CAF30730.1     | alkyl hydroperoxide reductase/Thiol specific antioxidant                    | Methanococcus maripaludis S2           | FSHPGDFTPVCITTEFLSVDHSHKWKIDIDEKDLTAA       |
| 120 | 0        | 109631652 gb  | ABG36000.1     | glutathione peroxidase                                                      | Helianthus annuus                      | FSHPGDFTPVCITTEFLSVDHSHKWKIDIDEKDLTAA       |
|     |          | 109631654 gb  | ABG36001.1     | glutathione peroxidase                                                      | Helianthus annuus                      |                                             |
| 121 | 0        | 66535082 ref  | XP_624361.1    | PREDICTED: similar to Peroxiredoxin 2540 CG11765-P                          | Apis mellifera                         | FSHPADFTPVCITTEFLSVDHSHKWKIDIDEKDLTAA       |
| 122 | 0        | 163811666 ref | ZP_02203350.1  | Peroxidase                                                                  | Dehalococcoides sp. VS                 | FSHPADFTPVCITTEFLSVDHSHKWKIDIDEKDLTAA       |
|     |          | 157404720 gb  | EDO70756.1     | Peroxidase                                                                  | Dehalococcoides sp. VS                 |                                             |
| 123 | 0        | 146309339 ref | YP_001189804.1 | Peroxidase                                                                  | Pseudomonas mendocina ymp              | FSHPADFTPVCITTEFLSVDHSHKWKIDIDEKDLTAA       |
|     |          | 145677540 gb  | ABP87072.1     | 1-Cys peroxiredoxin                                                         | Pseudomonas mendocina ymp              |                                             |
| 124 | 0        | 75070579 sp   | Q9R7E0         | PRDX6_PONPY Peroxiredoxin-6                                                 | Pongo pygmaeus                         | FSHPRDFTPVCITTEFLSVDHSHKWKIDIDEKDLTAA       |
|     |          | 55731212 emb  | CAH92320.1     | hypothetical protein                                                        | Pongo pygmaeus                         |                                             |
| 125 | 0        | 109631600 gb  | ABG35974.1     | glutathione peroxidase                                                      | Helianthus annuus                      | FSHPGDFTPVCITTEFLSVDHSHKWKIDIDEKDLTAA       |
|     |          | 109631602 gb  | ABG35975.1     | glutathione peroxidase                                                      | Helianthus annuus                      |                                             |
| 126 | 0        | 59861147 gb   | AAO09929.1     | glutathione peroxidase                                                      | Aurelia aurita                         | FSHPADYTPVCITTEFLSVDHSHKWKIDIDEKDLTAA       |
| 127 | 0        | 3219774 sp    | O08709         | PRDX6_MOUSE Peroxiredoxin-6 (Antioxidant protein 2)                         | Mus musculus                           | FSHPRDFTPVCITTEFLSVDHSHKWKIDIDEKDLTAA       |
|     |          | 2072655 emb   | CAA73383.1     | nonseleium glutathione peroxidase                                           | Mus musculus                           |                                             |
|     |          | 2240033 gb    | AAC53277.1     | antioxidant protein 2                                                       | Mus musculus                           |                                             |
|     |          | 30267702 gb   | AAP21829.1     | peroxiredoxin 6                                                             | Mus musculus                           |                                             |
|     |          | 74212021 dbj  | BAE40177.1     | unnamed protein product                                                     | Mus musculus                           |                                             |
| 128 | 0        | 84319811 ref  | ZP_00968200.1  | COG0450: Peroxiredoxin                                                      | Pseudomonas aeruginosa C3719           | FSHPADFTPVCITTEFLSVDHSHKWKIDIDEKDLTAA       |
|     |          | 126168335 gb  | EAZ53846.1     | hypothetical protein PACG_02384                                             | Pseudomonas aeruginosa C3719           |                                             |
| 129 | 0        | 75324900 sp   | Q6W8Q2         | REHY_WHEAT 1-Cys peroxiredoxin PER1 (Thioredoxin)                           | Triticum aestivum                      | FSHPGDFTPVCITTEFLSVDHSHKWKIDIDEKDLTAA       |
|     |          | 34539782 ref  | AAQ74769.1     | 1-Cys peroxiredoxine                                                        | Triticum aestivum                      |                                             |
| 131 | 0        | 92116532 ref  | YP_576261.1    | alkyl hydroperoxide reductase/Thiol specific antioxidant                    | Nitrobacter hamburgensis X14           | DVTPRFSPADFTPVCITTEFLSVDHSHKWKIDIDEKDLTAA   |

|     |          |               |                |                                                          |                                         |                                         |
|-----|----------|---------------|----------------|----------------------------------------------------------|-----------------------------------------|-----------------------------------------|
| 132 |          | 91799426 gb   | ABE61801.1     | 1-Cys peroxiredoxin                                      | Nitro bacter hamburgensis X14           | FSHPADYTPVCTITELLVSDSHKGVNDIQLYDITLTVR  |
|     | 0        | 78065379 ref  | YP_368148.1    | Peroxidase                                               | Burkholderia sp. 383                    |                                         |
|     |          | 77966124 gb   | ABB07504.1     | Peroxidase                                               | Burkholderia sp. 383                    | FSHPADYTPVCTITELKIKDLVSDDDHGGWVKDKVTVR  |
| 133 | 0        | 83859653 ref  | ZP_00953173.1  | Peroxidase                                               | Oceanicaulis alexandrii HTCC2633        |                                         |
|     |          | 83852012 gb   | EAP89866.1     | Peroxidase                                               | Oceanicaulis alexandrii HTCC2633        |                                         |
| 134 | 0        | 149636157 ref | XP_001515331.1 | PREDICTED: hypothetical protein                          | Ornithorynchus anatinus                 | FSHPRDFTPVCTITELLSDDDLHAWCKDILGMLPLTVR  |
| 135 | 7.09E-13 | 66811836 ref  | XP_640097.1    | hypothetical protein DDBDRAFT_0204808                    | Dicystostellium discoideum AX4          | VSHPKDFTPICITELLVSDDDHLEWWMKDKITFVRQLTD |
|     |          | 60468108 gb   | EAL66118.1     | AhpC/TSA family protein                                  | Dicystostellium discoideum AX4          |                                         |
| 136 | 0        | 15598646 ref  | NP_252140.1    | probable antioxidant protein                             | Pseudomonas aeruginosa PAO1             | FSHPADFPVCTITELKIKDLVSDSHLKWIDDITLTVR   |
|     |          | 107702984 ref | ZP_01366902.1  | hypothetical protein PaerPA_01004053                     | Pseudomonas aeruginosa PACS2            |                                         |
|     |          | 9949591 gb    | AAG06838.1     | AE004765_11, probable antioxidant protein                | Pseudomonas aeruginosa PAO1             |                                         |
| 137 | 0        | 113868776 ref | YP_727265.1    | Peroxiredoxin                                            | Raistonia eutropha H16                  | FSHPADYTPVCTITELKIKDLVSDSHRQWIDDITLTVR  |
|     |          | 113527552 emb | CAJ93897.1     | Peroxiredoxin                                            | Raistonia eutropha H16                  |                                         |
| 138 | 2.56E-14 | 50302365 ref  | XP_451117.1    | unnamed protein product                                  | Kluveromyces lactis                     | QGKWFSPADFPVCTITELTNSHLRWIQQIDPLRAV     |
|     |          | 49640248 emb  | CAH02705.1     | unnamed protein product                                  | Kluveromyces lactis NRRL Y-1140         |                                         |
| 139 | 0        | 118030221 ref | ZP_01501679.1  | alkyl hydroperoxide reductase/Thiol specific antioxidant | Burkholderia phymatum STM815            | FSHPADFPVCTITELLVSDSHNEWIKDIQLYDITLTVR  |
|     |          | 117963988 gb  | EAU98388.1     | alkyl hydroperoxide reductase/Thiol specific antioxidant | Burkholderia phymatum STM815            |                                         |
| 140 | 0        | 94496263 ref  | ZP_0130284.1   | Peroxidase                                               | Sphingomonas sp. SKA58                  | FEADFSPKDFTPVCTITELLSVDDHGGWMMQDINATVR  |
|     |          | 94424442 gb   | EAT09465.1     | Peroxidase                                               | Sphingomonas sp. SKA58                  |                                         |
| 141 | 0        | 91777323 ref  | YP_552531.1    | Peroxidase                                               | Burkholderia xenovorans LB400           | FSHPADFPVCTITELLSDSHLAWLRSYGMLSSTVR     |
|     |          | 91689983 gb   | ABE3318.1      | 1-Cys peroxiredoxin                                      | Burkholderia xenovorans LB400           | FSHPRDFTPVCTITELLSDDLHAWKDKIVEKDPVTVR   |
| 142 | 0        | 50510361 dbj  | BAD32166.1     | mKAA0106 protein                                         | Mus musculus                            | FSHPGDFTPVCTITELSDGHKIKWVEWILGMITGITIR  |
| 143 | 0        | 159905879 ref | YP_001549541.1 | alkyl hydroperoxide reductase/Thiol specific antioxidant | Methanococcus maripaludis C6            |                                         |
|     |          | 159887372 gb  | ABX02309.1     | alkyl hydroperoxide reductase/Thiol specific antioxidant | Methanococcus maripaludis C6            |                                         |
| 144 | 2.75E-14 | 116251768 ref | YP_767604.1    | putative peroxidase                                      | Rhizobium leguminosarum bv. viciae 3841 | FSHPKNTFPVCTITELVSDSHAKWKNDINATVROGED   |
|     |          | 115256414 emb | CAK07496.1     | putative peroxidase                                      | Rhizobium leguminosarum bv. viciae 3841 |                                         |
| 145 | 0        | 156937253 ref | YP_001435049.1 | alkyl hydroperoxide reductase/Thiol specific antioxidant | Ignicoccus hospitalis KIN41             | FSHPADFPVCTITELVSDSHIKWKEWILGMLVTVR     |
|     |          | 156566237 gb  | ABU81642.1     | alkyl hydroperoxide reductase/Thiol specific antioxidant | Ignicoccus hospitalis KIN41             |                                         |
| 146 | 0        | 16028272 ref  | NP_394414.1    | putative peroxiredoxin                                   | Thermoplasma acidophilum DSM 1728       | FSHPGDFTPVCTITEFYKDLSDSHAWIRDIGATVR     |
|     |          | 162448440 ref | YP_001610807.1 | Probable peroxiredoxin                                   | Sorangium cellulosum 'So ce 56'         | FSHPKDFTPVCTITELLVSDSHKRSVSDITLTVRQLTD  |
| 147 | 0        | 161159022 emb | CAN90327.1     | Probable peroxiredoxin                                   | Sorangium cellulosum 'So ce 56'         |                                         |
| 148 | 0        | 87124191 ref  | ZP_01080040.1  | alkyl hydroperoxide reductase                            | Synechococcus sp. RS9917                | THGPRFSPADFPVCTITELFQFQDLSDAHLAWRNI     |
|     |          | 86167763 gb   | EAG069021.1    | alkyl hydroperoxide reductase                            | Synechococcus sp. RS9917                |                                         |
| 149 | 0        | 15922774 ref  | NP_378443.1    | putative peroxiredoxin                                   | Sulfolobus tokodaii str. 7              | QGKWFSPGDFTPVCTITELVSDSHIEVWMMWITSVTR   |
|     |          | 23822254 sp   | Q66XS5         | TDX12_SJLT0 Probable peroxiredoxin 2                     | Sulfolobus tokodaii str. 7              |                                         |
|     |          | 15823565 dbj  | BAB67552.1     | 212aa long hypothetical peroxiredoxin                    | Sulfolobus tokodaii str. 7              |                                         |
| 150 | 9.27E-13 | 154246305 ref | YP_001417263.1 | Peroxidase                                               | Xanthobacter autotrophicus Py2          | FSHPKNTFPVCTITELPEFDLSVDNHPAWVGDIATVR   |
|     |          | 154160390 gb  | ABS67606.1     | Peroxidase                                               | Xanthobacter autotrophicus Py2          |                                         |
| 151 | 0        | 78186464 ref  | YP_374507.1    | peroxiredoxin                                            | Peledicyon luteolum DSM 273             | FSHPADYTPVCTITEFMSVDSHKKWVEWIQGKVAVTAL  |
|     |          | 78166366 gb   | ABB23484.1     | 3-Cys thioredoxin peroxidase / 1-Cys peroxiredoxin       | Peledicyon luteolum DSM 273             |                                         |
| 152 | 0        | 843566898 ref | ZP_00981730.1  | COG0450: Peroxiredoxin                                   | Burkholderia cenocepacia PC184          | FSHPADYTPVCTITELLVSDSHKGVNDIQLYDITLTVR  |
|     |          | 107021887 ref | YP_620214.1    | Peroxidase                                               | Burkholderia cenocepacia AU 1054        |                                         |
|     |          | 116688635 ref | YP_834458.1    | Peroxidase                                               | Burkholderia cenocepacia HI2424         |                                         |
|     |          | 118713703 ref | ZP_01566267.1  | Peroxidase                                               | Burkholderia cenocepacia MCO-3          |                                         |
|     |          | 105892076 gb  | ABF75241.1     | Peroxidase                                               | Burkholderia cenocepacia AU 1054        |                                         |
|     |          | 116846824 gb  | ABK07565.1     | Peroxidase                                               | Burkholderia cenocepacia HI2424         |                                         |
|     |          | 118848921 gb  | EAV55722.1     | Peroxidase                                               | Burkholderia cenocepacia MCO-3          |                                         |
|     |          | 124870986 gb  | EAY62702.1     | Peroxidase                                               | Burkholderia cenocepacia PC184          |                                         |
| 153 | 0        | 91777335 ref  | YP_552543.1    | Peroxidase                                               | Burkholderia xenovorans LB400           | FSHPADFPVCTITELLVSDSHKWKIKDITLTVRQGGD   |
|     |          | 91689993 gb   | ABE33193.1     | 1-Cys peroxiredoxin                                      | Burkholderia xenovorans LB400           |                                         |
| 154 | 1.37E-14 | 162148432 ref | YP_001602893.1 | putative peroxiredoxin                                   | Glucacetobacter diazotrophicus PAI 5    | FSHPKDFTPVCTITELLVSDSHSEWESDKVTVRQLTD   |
|     |          | 161787009 emb | CAP56594.1     | putative peroxiredoxin                                   | Glucacetobacter diazotrophicus PAI 5    |                                         |
| 155 | 0        | 124027125 ref | YP_001012445.1 | Peroxiredoxin family                                     | Hyperthermus butylicus DSM 5456         | GEKFFSPADFPVCTITELVSDSHKIKWAEWITATVR    |
|     |          | 123977819 gb  | ABM80100.1     | Peroxiredoxin family                                     | Hyperthermus butylicus DSM 5456         |                                         |
| 156 | 0        | 20860791 ref  | NP_621962.1    | Peroxiredoxin                                            | Thermoanaerobacter tengcongensis MB4    | FSHPADFPVCTITELLVSDSHKIKWVEWILGMITTVTR  |
|     |          | 20515254 gb   | AAM23566.1     | Peroxiredoxin                                            | Thermoanaerobacter tengcongensis MB4    |                                         |
| 157 | 0        | 147918688 ref | YP_687589.1    | 1-cysteine peroxiredoxin                                 | uncultured methanogenic archaeon RC-1   | TGGDFSPADFPVCTITELLVSDSHIAWVRDIPHTQH    |
|     |          | 110622985 emb | CAJ38263.1     | 1-cysteine peroxiredoxin                                 | uncultured methanogenic archaeon RC-1   |                                         |
| 158 | 0        | 84500700 ref  | ZP_00988949.1  | thiol-specific antioxidant protein                       | Oceanicola batsensis HTCC2597           | FSHPKDFTPVCTITELFLADISVDDHKKWKGDISATVR  |
|     |          | 84391653 gb   | EAG03985.1     | thiol-specific antioxidant protein                       | Oceanicola batsensis HTCC2597           |                                         |
| 159 | 0        | 149326987 ref | ZP_01915245.1  | thiol-specific antioxidant protein                       | Limnobacter sp. MED105                  | FSHPKDFTPVCTITELVSDHKKWKGDIIRTAAGQGD    |
|     |          | 149824208 gb  | EDM83428.1     | thiol-specific antioxidant protein                       | Limnobacter sp. MED105                  |                                         |
| 160 | 0        | 116051470 ref | YP_789697.1    | putative thiol-specific antioxidant protein              | Pseudomonas aeruginosa UCBPPP-PA14      | FSHPADFPVCTITELKIKDLVSDSHLKWIDDITLTVR   |
|     |          | 115586691 gb  | ABJ12706.1     | putative thiol-specific antioxidant protein              | Pseudomonas aeruginosa UCBPPP-PA14      |                                         |

|     |          |               |                |                                                           |                                           |                                           |
|-----|----------|---------------|----------------|-----------------------------------------------------------|-------------------------------------------|-------------------------------------------|
| 161 | 0        | 4139186 gb    | AAD03716.1     | 1-Cys peroxiredoxin protein                               | Mus musculus                              | FSHPDRFPPVCTITTELLSIDDHLLAWSKDIKVEKDPVTAR |
| 162 | 1.49E-11 | 56461442 ref  | YP_156723.1    | Peroxiredoxin, AhpC/Tsa family                            | Idiomarina lithiensis L2TR                | FSHPADYTPVCTIEMLSITDAHKGWINDVQLYDIATVTR   |
| 163 | 0        | 56180452 gb   | AAV83174.1     | Peroxiredoxin, AhpC/Tsa family                            | Idiomarina lithiensis L2TR                | PLTRRF-SHPADFTPVCTITTELLSANS-HDKWIKQIQEDL |
| 164 | 3.73E-13 | 114192333 gb  | EALU34035.1    | mitochondrial peroxiredoxin PRX1                          | Aspergillus terreus NIH2624               | FSHPEDYTPVCTITTELLSANS-HGGWKIDIASTGRQRTGD |
| 165 | 0        | 154323320 ref | XP_001560974.1 | conserved hypothetical protein                            | Botryotinia fuckeliana B05.10             | FSHPKDFTPVCTITEFVSVDHDKKWKSDISATVSRQLKL   |
| 166 | 0        | 126740753 ref | ZP_01756438.1  | thiol-specific antioxidant protein                        | Roseobacter sp. SK209-2-6                 | FSHPADFTPVCTITTELLHSVDHVDVWVNDIQKDKDQLTDR |
| 167 | 0        | 17975518 ref  | NP_523883.1    | Peroxiredoxin 2540 CG11765-PA, isoform A                  | Drosophila melanogaster                   | FSHPKDFTPVCTITEFLADVSDVDDHKKWKGDISATVTR   |
| 168 | 0        | 7303750 gb    | AAF56799.1     | CG11765-PA                                                | Drosophila melanogaster                   | FSHPDRFTPVCTITTELLSIDDHFWAWSKDIAEKDPVTAR  |
| 169 | 0        | 17945024 gb   | AAAL48574.1    | RE050093p                                                 | Drosophila melanogaster                   | FSHPADFTPVCTITTELLSIDDHFWAWSKDIAEKDPVTAR  |
| 170 | 5.45E-15 | 20151893 gb   | AAAM11306.1    | RH695986p                                                 | Drosophila melanogaster                   | FSHPKDFTPVCTITEFLADVSDVDDHKKWKGDISATVTR   |
| 171 | 0        | 56699207 ref  | YP_168579.1    | thiol-specific antioxidant protein                        | Silicibacter pomeroyi DSS-3               | FSHPDRFTPVCTITTELLSIDDHFWAWSKDIAEKDPVTAR  |
| 172 | 0        | 56679944 gb   | AAV96610.1     | thiol-specific antioxidant protein                        | Silicibacter pomeroyi DSS-3               | FSHPDRFTPVCTITTELLSIDDHFWAWSKDIAEKDPVTAR  |
| 173 | 0        | 16759348 ref  | NP_446028.1    | peroxiredoxin 6                                           | Rattus norvegicus                         | FSHPADYTPVCTITTELLSVDSHKGVINDIQLYDITLTVR  |
| 174 | 0        | 5902791 sp    | O35244         | PRDX6_RAT Peroxiredoxin-6 (Antioxidant protein 2) (1-Cys) | Rattus norvegicus                         | FSHPKDFTPVCTITEFVSVDHDKKWKSDISATVSRQLKL   |
| 175 | 0        | 2317735 gb    | AAB66341.1     | acidic calcium-independent phospholipase A2               | Rattus norvegicus                         | FSHPADFTPVCTITTELLHSVDHVDVWVNDIQKDKDQLTDR |
| 176 | 0        | 3688521 emb   | CAA76732.1     | thiol-specific antioxidant protein                        | Rattus norvegicus                         | FSHPDRFTPVCTITTELLSIDDHLLAWSKDTAEKDPVTAR  |
| 177 | 0        | 149058259 gb  | EDM09416.1     | peroxiredoxin 6, isoform CRA_a                            | Rattus norvegicus                         | FSHPADFTPVCTITTELLSVDSHKGVINDIQLYDITLTVR  |
| 178 | 0        | 84360893 ref  | ZP_00985580.1  | COG0450: Peroxiredoxin                                    | Burkholderia dolosa AUJ0158               | FSHPADFTPVCTITTELLSVDHFWAWSKDIAEKDPVTAR   |
| 179 | 0        | 124895740 gb  | EAY69620.1     | Peroxiredoxin                                             | Burkholderia dolosa AUJ0158               | FSHPADFTPVCTITTELLSVDHFWAWSKDIAEKDPVTAR   |
| 180 | 0        | 149918867 ref | ZP_01907056.1  | Peroxidase                                                | Plesiocystis pacifica SIR-1               | FSHPKDFTPVCTITTELLSVDHFWAWSKDIAEKDPVTAR   |
| 181 | 0        | 149820643 gb  | EDM80055.1     | Peroxidase                                                | Plesiocystis pacifica SIR-1               | FSHPDRFTPVCTITTELLSIDDHLLAWSKDTAEKDPVTAR  |
| 182 | 0        | 118597400 sp  | O2PFL9         | PRDX6_MACFA Peroxiredoxin-6                               | Macaca fascicularis                       | FSHPADFTPVCTITTELLSVDHFWAWSKDIAEKDPVTAR   |
| 183 | 0        | 84579335 gb   | BAE73101.1     | hypothetical protein                                      | Macaca fascicularis                       | FSHPADFTPVCTITTELLSVDHFWAWSKDIAEKDPVTAR   |
| 184 | 0        | 14286184 sp   | Q68146         | TDXH_METUA Probable peroxiredoxin                         | Meihamococcus jamaaschii                  | FSHPADFTPVCTITTELLSVDHFWAWSKDIAEKDPVTAR   |
| 185 | 0        | 83855234 ref  | ZP_00948764.1  | thiol-specific antioxidant protein                        | Sulfitobacter sp. NAS-14.1                | FSHPADFTPVCTITTEFLSVDSHKGVINDIQLYDITLTVR  |
| 186 | 0        | 83843077 gb   | EAP82244.1     | thiol-specific antioxidant protein                        | Sulfitobacter sp. NAS-14.1                | FSHPADFTPVCTITTEFLSVDSHKGVINDIQLYDITLTVR  |
| 187 | 0        | 94502046 ref  | ZP_01308551.1  | Peroxidase                                                | Oceanobacter sp. RED65                    | FSHPADFTPVCTITTEFLSVDSHKGVINDIQLYDITLTVR  |
| 188 | 0        | 94425800 gb   | EAT10803.1     | Peroxidase                                                | Oceanobacter sp. RED65                    | FSHPADFTPVCTITTEFLSVDSHKGVINDIQLYDITLTVR  |
| 189 | 0        | 28210603 ref  | NP_781549.1    | peroxiredoxin                                             | Clostridium tetani E88                    | FSHPADFTPVCTITTEFLSVDSHKGVINDIQLYDITLTVR  |
| 190 | 0        | 28203043 gb   | AAO35486.1     | putative peroxiredoxin, alkyl hydroperoxide reductase C2  | Clostridium tetani E88                    | FSHPADFTPVCTITTEFLSVDSHKGVINDIQLYDITLTVR  |
| 191 | 0        | 119357758 ref | YP_912402.1    | peroxiredoxin                                             | Chlorobium phaeobacteroides DSM 266       | FSHPADFTPVCTITTEFLSVDSHKGVINDIQLYDITLTVR  |
| 192 | 0        | 119355107 gb  | ABL65978.1     | 1-Cys peroxiredoxin / 3-Cys thioredoxin peroxidase        | Chlorobium phaeobacteroides DSM 266       | FSHPADFTPVCTITTEFLSVDSHKGVINDIQLYDITLTVR  |
| 193 | 0        | 113478360 ref | YP_724421.1    | Peroxidase                                                | Trichodesmium erythraeum IMS101           | FSHPADFTPVCTITTEFLSVDSHKGVINDIQLYDITLTVR  |
| 194 | 0        | 110169408 gb  | ABG53948.1     | 1-Cys peroxiredoxin                                       | Trichodesmium erythraeum IMS101           | FSHPADFTPVCTITTEFLSVDSHKGVINDIQLYDITLTVR  |
| 195 | 0        | 134045457 ref | YP_001096943.1 | peroxiredoxin                                             | Meihamococcus maripaludis C5              | FSHPADFTPVCTITTEFLSVDSHKGVINDIQLYDITLTVR  |
| 196 | 0        | 132663082 gb  | ABO34728.1     | 1-Cys peroxiredoxin / 3-Cys thioredoxin peroxidase        | Meihamococcus maripaludis C5              | FSHPADFTPVCTITTEFLSVDSHKGVINDIQLYDITLTVR  |
| 197 | 0        | 94311588 ref  | YP_584798.1    | alkyl hydroperoxide reductase/Thiol specific antioxidant  | Ralstonia metallidurans CH34              | FSHPADFTPVCTITTEFLSVDSHKGVINDIQLYDITLTVR  |
| 198 | 0        | 93355440 gb   | ABF09529.1     | 1-Cys peroxiredoxin                                       | Ralstonia metallidurans CH34              | FSHPADFTPVCTITTEFLSVDSHKGVINDIQLYDITLTVR  |
| 199 | 0        | 28393058 gb   | AAO41963.1     | putative peroxiredoxin                                    | Arabidopsis thaliana                      | FSHPADFTPVCTITTEFLSVDSHKGVINDIQLYDITLTVR  |
| 200 | 0        | 48310630 gb   | AA141856.1     | At1g48130                                                 | Arabidopsis thaliana                      | FSHPADFTPVCTITTEFLSVDSHKGVINDIQLYDITLTVR  |
| 201 | 0        | 91781938 ref  | YP_557144.1    | Peroxidase                                                | Burkholderia xenovorans LB400             | FSHPADFTPVCTITTEFLSVDSHKGVINDIQLYDITLTVR  |
| 202 | 0        | 91685892 gb   | ABE29092.1     | 1-Cys peroxiredoxin                                       | Burkholderia xenovorans LB400             | FSHPADFTPVCTITTEFLSVDSHKGVINDIQLYDITLTVR  |
| 203 | 0        | 85543926 gb   | 1X0R           | A Chain A, Thioredoxin Peroxidase From Aeropyrum Per      | Aeropyrum Permix K1                       | FSHPADFTPVCTITTEFLSVDSHKGVINDIQLYDITLTVR  |
| 204 | 0        | 85543927 gb   | 1X0R           | B Chain B, Thioredoxin Peroxidase From Aeropyrum Per      | Aeropyrum Permix K2                       | FSHPADFTPVCTITTEFLSVDSHKGVINDIQLYDITLTVR  |
| 205 | 0        | 85543928 gb   | 1X0R           | C Chain C, Thioredoxin Peroxidase From Aeropyrum Per      | Aeropyrum Permix K3                       | FSHPADFTPVCTITTEFLSVDSHKGVINDIQLYDITLTVR  |
| 206 | 0        | 85543929 gb   | 1X0R           | D Chain D, Thioredoxin Peroxidase From Aeropyrum Per      | Aeropyrum Permix K4                       | FSHPADFTPVCTITTEFLSVDSHKGVINDIQLYDITLTVR  |
| 207 | 0        | 85543930 gb   | 1X0R           | E Chain E, Thioredoxin Peroxidase From Aeropyrum Per      | Aeropyrum Permix K5                       | FSHPADFTPVCTITTEFLSVDSHKGVINDIQLYDITLTVR  |
| 208 | 0        | 85543931 gb   | 1X0R           | F Chain F, Thioredoxin Peroxidase From Aeropyrum Per      | Aeropyrum Permix K6                       | FSHPADFTPVCTITTEFLSVDSHKGVINDIQLYDITLTVR  |
| 209 | 0        | 85543932 gb   | 1X0R           | G Chain G, Thioredoxin Peroxidase From Aeropyrum Per      | Aeropyrum Permix K7                       | FSHPADFTPVCTITTEFLSVDSHKGVINDIQLYDITLTVR  |
| 210 | 0        | 85543933 gb   | 1X0R           | H Chain H, Thioredoxin Peroxidase From Aeropyrum Per      | Aeropyrum Permix K8                       | FSHPADFTPVCTITTEFLSVDSHKGVINDIQLYDITLTVR  |
| 211 | 0        | 85543934 gb   | 1X0R           | I Chain I, Thioredoxin Peroxidase From Aeropyrum Per      | Aeropyrum Permix K9                       | FSHPADFTPVCTITTEFLSVDSHKGVINDIQLYDITLTVR  |
| 212 | 0        | 21623834 gb   | BAC00970.1     | thiol-specific antioxidant protein                        | Aeropyrum Permix K10                      | FSHPADFTPVCTITTEFLSVDSHKGVINDIQLYDITLTVR  |
| 213 | 0        | 15843570 ref  | NP_228616.1    | peroxiredoxin                                             | Pseudomonas putida                        | FSHPADFTPVCTITTEFLSVDSHKGVINDIQLYDITLTVR  |
| 214 | 0        | 14285794 sp   | Q9WZR4         | TDXH_THEMA Probable peroxiredoxin                         | Thermotoga maritima MSB8                  | FSHPADFTPVCTITTEFLSVDSHKGVINDIQLYDITLTVR  |
| 215 | 0        | 4981337 gb    | AAD35689.1     | AE001748_5 alkyl hydroperoxide reductase, putative        | Thermotoga maritima MSB8                  | FSHPADFTPVCTITTEFLSVDSHKGVINDIQLYDITLTVR  |
| 216 | 0        | 109631590 gb  | ABG35969.1     | glutathione peroxidase                                    | Helianthus annuus                         | FSHPADFTPVCTITTEFLSVDSHKGVINDIQLYDITLTVR  |
| 217 | 0        | 10180976 gb   | AAAG14353.1    | 1-Cys peroxiredoxin                                       | Plasmodium falciparum                     | FSHPADFTPVCTITTEFLSVDSHKGVINDIQLYDITLTVR  |
| 218 | 0        | 76795465 ref  | ZP_00777638.1  | Alkyl hydroperoxide reductase/Thiol specific antioxidant  | Thermoanaerobacter ethanolicus ATCC 33223 | FSHPADFTPVCTITTEFLSVDSHKGVINDIQLYDITLTVR  |
| 219 | 0        | 114843769 ref | ZP_01454230.1  | alkyl hydroperoxide reductase/Thiol specific antioxidant  | Thermoanaerobacter ethanolicus X514       | FSHPADFTPVCTITTEFLSVDSHKGVINDIQLYDITLTVR  |
| 220 | 0        | 76589273 gb   | EAO65672.1     | Alkyl hydroperoxide reductase/Thiol specific antioxidant  | Thermoanaerobacter ethanolicus ATCC 33223 | FSHPADFTPVCTITTEFLSVDSHKGVINDIQLYDITLTVR  |

|     |          |               |                |                                                                                 |                                                           |                                           |
|-----|----------|---------------|----------------|---------------------------------------------------------------------------------|-----------------------------------------------------------|-------------------------------------------|
| 188 | 0        | 114806218.gb  | EAU57998.1     | alkyl hydroperoxide reductase/Thiol specific antioxidant/                       | Thermoanaerobacter ethanolicus X514                       | FSHPADFTPVCTTEFLSIDSHKHWIEAWAEMLTNIVR     |
| 189 | 0        | 14286174.sp   | O29969         | TDXH_ARCFU Probable peroxidoredoxin                                             | Archaeoglobus fulgidus                                    | FSHPGDFTPVCTTEFLSVDSHIEWWIMWLGMITATVR     |
|     |          |               | 159898905.ref  | putative peroxidoredoxin                                                        | Sulfolobus solfataricus P2                                |                                           |
|     |          |               | 3024725.sp     | TDXH_SULSO Probable peroxidoredoxin                                             | Sulfolobus solfataricus                                   |                                           |
|     |          |               | P95895         | orf c02015                                                                      | Sulfolobus solfataricus                                   |                                           |
|     |          |               | 1707721.emb    | CAA69447.1                                                                      | Sulfolobus solfataricus                                   |                                           |
|     |          |               | 13815414.gb    | AAK42300.1                                                                      | Sulfolobus solfataricus P2                                |                                           |
| 190 | 0        | 162690525.gb  | EDG76892.1     | Peroxiredoxin, bacterioferritin comigratory protein homol predicted protein     | Physcomitrella patens subsp. patens                       | FSHPNDFTPVCTTEFLSCNSHKGWADJFGMLPLTAR      |
| 191 | 0        | 149369961.ref | JP_01889812.1  | antioxidant, AhpC/TSA family protein                                            | unidentified eubacterium SCB49                            | SDFAKDKWIFSHPADFTPVCTTEMLSDYGMGLTA AVR    |
|     |          |               | 149356452.gb   | EDM45008.1                                                                      | unidentified eubacterium SCB49                            |                                           |
| 192 | 0        | 121607854.ref | YP_995661.1    | Peroxidase                                                                      | Verminephrobacter eiseniae EF01-2                         | FSHPADFTPVCTTEFLVSDAHQHRVQDDITAVRQLTD     |
|     |          |               | 121552494.gb   | ABM56643.1                                                                      | Verminephrobacter eiseniae EF01-2                         |                                           |
| 194 | 0        | 158517776.sp  | POC5C8         | REHYA_ORYS1 1-Cys peroxidoredoxin A (1-Cys Prx. A) (Th antioxidant protein Lsfa | Onyza sativa indica Group                                 | GLTIGFHPGDFTPVCTTEFLSVDSHKWKWIKDIKDEK     |
| 195 | 1.69E-15 | 121707160.ref | XP_001271750.1 | antioxidant protein Lsfa                                                        | Aspergillus clavatus NRRL 1                               | QERAF-SHPDDFTPVCTTEFLSANSHKAWIKDVGVTCP    |
|     |          |               | 119399898.gb   | EAW10324.1                                                                      | antioxidant protein Lsfa                                  |                                           |
|     |          |               | 78357602.ref   | YP_389051.1                                                                     | alkyl hydroperoxide reductase                             | FSHPADYTPVCTTEFLSIDSHKHWVWDWILGMITNIVR    |
|     |          |               | 78220007.gb    | ABB39356.1                                                                      | 3-Cys thioredoxin reductase / 1-Cys peroxidoredoxin       |                                           |
| 197 | 0        | 50285063.ref  | XP_444960.1    | hypothetical protein CAGLOA04433g                                               | Desulfivibrio desulfuricans G20                           | SEKTF-SHPADF TPVCTTEMLSVESHHRKWIKDILTTVR  |
|     |          |               | 49524262.emb   | CAG57853.1                                                                      | unamed protein product                                    |                                           |
| 198 | 0        | 164888417.ref | JP_02212445.1  | hypothetical protein CLOBAR_02062                                               | Clostridium bartlettii DSM 16795                          | FSHPGDFTPVCTTEFLVSDHSLAWVYNTSTVYRALKD     |
|     |          |               | 164602830.gb   | EDQ96295.1                                                                      | hypothetical protein CLOBAR_02062                         |                                           |
| 199 | 0        | 25990368.gb   | AAW76502.1     | AF320690_1 1-cys-peroxidoredoxin                                                | Brassica napus                                            | FSHPGDFTPVCTTEFLSVDSHKWKWIDVGPDSITGTR     |
| 200 | 0        | 114764220.ref | JP_01443458.1  | thiol-specific antioxidant protein                                              | Roseovarius sp. HTCC2801                                  | FSHPKDFTPVCTTEFLQLADEHKKWKGDISATVRLSLD    |
|     |          |               | 114543372.gb   | EAU46388.1                                                                      | thiol-specific antioxidant protein                        | FSHPADFTPVCTTEFLKDLSDVDSHKKWIDDIITFTVR    |
| 201 | 0        | 17545473.ref  | NP_518875.1    | PROBABLE ANTI-OXIDANT (PEROXIDASE) OXIDOREF                                     | Ralstonia solanacearum GMI1000                            |                                           |
| 202 | 0        | 17427763.emb  | CAD14284.1     | probable antioxidant (peroxidase) oxidoreductase protein                        | Ralstonia solanacearum                                    | FSHPKDFTPVCTTEFLSVDNHKGWAADITVTVRDGKGD    |
|     |          |               | 148261930.ref  | YP_001236057.1                                                                  | Peroxidase                                                |                                           |
|     |          |               | 146403611.gb   | ABO32138.1                                                                      | 1-Cys peroxidoredoxin                                     | FSHPKDYTPVCTTEFLVSCDDHGHGWSEDEKDPDLTAR    |
| 203 | 5.41E-16 | 58332500.ref  | NP_001011325.1 | peroxidoredoxin 6                                                               | Acidiphilium cryptum JF-5                                 |                                           |
|     |          |               | 56789119.gb    | AAH88077.1                                                                      | Peroxiredoxin 6                                           | FSHPGDFTPVCTTEFLSVDSHKWKWIDKDKDASTGR      |
| 204 | 0        | 109631616.gb  | ABG35982.1     | glutathione peroxidase                                                          | Helianthus annuus                                         |                                           |
|     |          |               | 109631618.gb   | ABG35983.1                                                                      | glutathione peroxidase                                    | FSHPKDFTPVCTTEFLSVDSHKWKWIDKDKDASTGR      |
| 205 | 0        | 18313088.ref  | NP_559755.1    | peroxidoredoxin, probable                                                       | Pyrobaculum aerophilum str. IM2                           | CKKDF-SHPADF TPVCTTEFLSVDSHIEWKRWQINLTVR  |
|     |          |               | 18160895.gb    | AAI63937.1                                                                      | peroxidoredoxin, probable                                 |                                           |
| 207 | 0        | 149287196.gb  | ABR23497.1     | truncated peroxidoredoxin                                                       | Ornithodoros parkeri                                      | FSHPADYTPVCTTEFLSVDSHKWKWIDKDKPLTAR       |
| 208 | 0        | 48477799.ref  | YP_023505.1    | putative peroxidoredoxin                                                        | Picrophilus torridus DSM 9790                             | LGKRF-SHPADF TPVCTTEFLSVDSHIEWLWLDIGNITVR |
|     |          |               | 56749759.sp    | Q6L140                                                                          | Picrophilus torridus DSM 9790                             |                                           |
|     |          |               | 48430447.gb    | AAT143312.1                                                                     | hypothetical peroxidoredoxin                              | FSHPADYTPVCTTEFLSVDSHKWKWADJFGMLPLTAR     |
| 209 | 0        | 45201464.ref  | NP_967034.1    | AGR368Wp                                                                        | Asibya gossypii ATCC 10895                                | PSTVLLRINF-SHPADF TPVCTTEFLQLKPKKHHWARDI  |
|     |          |               | 44986398.gb    | AAS54858.1                                                                      | AGR368Wp                                                  |                                           |
| 210 | 0        | 163720271.ref | JP_02127832.1  | alkyl hydroperoxide reductase/Thiol specific antioxidant/                       | Thermotoga sp. RQ2                                        | FSHPADFTPVCTTEFLSIDSHKHWIEWITNTVQREVYG    |
|     |          |               | 161406275.gb   | EDQ30482.1                                                                      | alkyl hydroperoxide reductase/Thiol specific antioxidant/ |                                           |
| 211 | 0        | 14041708.emb  | CAC38779.1     | glutathione peroxidase                                                          | Thermotoga sp. RQ2                                        | FSHPADFTPVCTTEFLSVDSHKWKWIDKDKPLTAR       |
|     |          |               | 114327572.ref  | YP_744729.1                                                                     | peroxidase                                                | QKQK-F-SHPKDF TPVCTTEFLSVDNIVTVRSDDAKKEQF |
|     |          |               | 114315746.gb   | ABI61806.1                                                                      | peroxidase                                                |                                           |
| 213 | 0        | 18447388.gb   | AAL68257.1     | RE05501p                                                                        | Drosophila melanogaster                                   | FSHPADFTPVCTTEFLHSVDSDHVDVNDIQQKDPVLAT    |
| 214 | 0        | 109631668.gb  | ABG36008.1     | glutathione peroxidase                                                          | Helianthus annuus                                         | FSHPGDFTPVCTTEFLSVDSHKWKWIDKDKDASTGR      |
|     |          |               | 109631670.gb   | ABG36009.1                                                                      | glutathione peroxidase                                    |                                           |
| 215 | 0        | 162688730.gb  | EDQ75105.1     | PREDICTED protein                                                               | Physcomitrella patens subsp. patens                       | FSHPNDFTPVCTTEFLSCNSHKGWADJFGMLPLTAR      |
| 216 | 0        | 15637218.ref  | XP_784500.2    | PREDICTED: similar to glutathione peroxidase, partial                           | Strongylocentrotus purpuratus                             | FSHPADYTPVCTTEFLSVDSHKWKWIDKDKDAL TAR     |
|     |          |               | 115926010.ref  | XP_001185732.1                                                                  | PREDICTED: similar to glutathione peroxidase, partial     |                                           |
| 217 | 0        | 156401378.ref | XP_001639268.1 | predicted protein                                                               | Strongylocentrotus purpuratus                             | FSHPADYTPVCTTEFLSVDSHKWKWIDKDKPLTAR       |
|     |          |               | 156226395.gb   | EDQ47205.1                                                                      | predicted protein                                         |                                           |
| 218 | 0        | 163763176.gb  | EDP83094.1     | phosphoribosylformylglycinamide cyclase                                         | Bacillus selenitireducens MLS10                           | QKQF-SHPADF TPVCTTEFLSVDSHIAWVRNV TETSAR  |
|     |          |               | 160356444.gb   | EDP83094.1                                                                      | phosphoribosylformylglycinamide cyclase                   |                                           |
| 219 | 0        | 116624971.ref | YP_827127.1    | Peroxidase                                                                      | Solibacter usitatus Ellin6076                             | QQPIF-SHPKDF TPVCTTEFLSVDNHGKWAADINATVR   |
|     |          |               | 116228133.gb   | ABJ186842.1                                                                     | Peroxidase                                                |                                           |
| 220 | 0        | 83941756.ref  | JP_00954218.1  | thiol-specific antioxidant protein                                              | Solibacter usitatus Ellin6076                             | FSHPKDFTPVCTTEFFEHKWKWGDISATVRQLKLSDD     |
|     |          |               | 83847576.gb    | EAP85451.1                                                                      | thiol-specific antioxidant protein                        |                                           |
| 221 | 0        | 104779502.ref | YP_606000.1    | Thiol-specific antioxidant protein Lsfa                                         | Pseudomonas entomophila L48                               | FSHPADFTPVCTTEFLKDLSDVDSHKKWIDDIITLTVR    |
|     |          |               | 96508489.emb   | CAK13183.1                                                                      | Thiol-specific antioxidant protein Lsfa                   |                                           |
| 222 | 0        | 120554333.ref | YP_958684.1    | Peroxidase                                                                      | Marinobacter aquaeolei VT8                                | LGDDF-SHPADYTPVCTTEFLSVSDSHNDWVKDQKTVTR   |
|     |          |               | 120324182.gb   | ABM18497.1                                                                      | 1-Cys peroxidoredoxin                                     |                                           |
| 223 | 3.77E-13 | 156057945.ref | XP_001594896.1 | mitochondrial peroxidoredoxin PRX1                                              | Sclerotinia sclerotiorum 1980                             | FSHPEDYTPVCTTEFLSANSHGKWKDIASTGRQITGD     |
|     |          |               | 154702489.gb   | EDQ02228.1                                                                      | mitochondrial peroxidoredoxin PRX1                        |                                           |

|     |          |               |                |                                                               |                                      |                                        |
|-----|----------|---------------|----------------|---------------------------------------------------------------|--------------------------------------|----------------------------------------|
| 224 | 0        | 62287901.sp   | Q8RCY5         | TDXH1_THE1N Probable peroxidoxin 1                            | Thermoanaerobacter tengcongensis     | FSHPADFTPVCITTEFLSVDSHHKWVWILGMIITNVR  |
| 225 | 0        | 125559318.gb  | EAZ04852.1     | hypothetical protein Osl_026084                               | Onyza sativa (indica cultivar-group) | GLTIGFHPGDFTPVCTTEFLSVDSHHKWIKIDKDK    |
| 226 | 3.97E-12 | 163775011.gb  | EDQ88637.1     | predicted protein                                             | Monosiga brevicollis MX1             | LSHPGDFTPVCTISELTLAARLSCDRHLEWKRQVQEMP |
| 227 | 0        | 118618325.gb  | YP_906657.1    | alkyl hydroperoxide reductase C protein AhpC_1                | Mycobacterium ulcerans Agv99         | QGFIFSHPADFTPVCITSEFLSVDSHIAWLRITITGIR |
| 228 | 0        | 118570433.gb  | ABL05186.1     | alkyl hydroperoxide reductase C protein AhpC_1                | Mycobacterium ulcerans Agv99         | FSHPADFTPVCITTEFLSVDSHHKWVQWITNTRQELG  |
| 229 | 0        | 154250120.gb  | YP_001410945.1 | Peroxiredoxin                                                 | Fervidobacterium nodosum R117-B1     | FSHPADFTPVCITTEFLSVDSHHKWVQWITNTRQELG  |
| 230 | 0        | 154154056.gb  | ABS61288.1     | Peroxiredoxin                                                 | Fervidobacterium nodosum R117-B1     | FSHPADFTPVCITTEFLSVDSHHKWVQWITNTRQELG  |
| 231 | 0        | 120404363.gb  | AAQ47824.1     | AF311880_1 1-cys peroxidoxin DPx-2540-2                       | Drosophila melanogaster              | FSHPADFTPVCITTEFLSVDSHHKWVQWITNTRQELG  |
| 232 | 0        | 115350747.gb  | YP_772586.1    | Peroxidase                                                    | Burkholderia ambifaria AMMD          | FSHPADFTPVCITTEFLSVDSHHKWVQWITNTRQELG  |
| 233 | 0        | 115280735.gb  | ABI86252.1     | Peroxidase                                                    | Burkholderia ambifaria AMMD          | FSHPADFTPVCITTEFLSVDSHHKWVQWITNTRQELG  |
| 234 | 0        | 50083879.gb   | YP_045389.1    | putative antioxidant protein                                  | Acinetobacter sp. ADP1               | FSHPADFTPVCITTEFLSVDSHHKWVQWITNTRQELG  |
| 235 | 0        | 49529855.emb  | CAG67567.1     | putative antioxidant protein                                  | Acinetobacter sp. ADP1               | FSHPADFTPVCITTEFLSVDSHHKWVQWITNTRQELG  |
| 236 | 0        | 163956213.ref | YP_001630511.1 | antioxidant protein                                           | Bordetella petrii                    | FSHPADFTPVCITTEFLSVDSHHKWVQWITNTRQELG  |
| 237 | 0        | 163259941.emb | CAP42242.1     | antioxidant protein                                           | Bordetella petrii                    | FSHPADFTPVCITTEFLSVDSHHKWVQWITNTRQELG  |
| 238 | 0        | 153003356.ref | YP_001377681.1 | Peroxidase                                                    | Anaeromyxobacter sp. Fw109-5         | FSHPADFTPVCITTEFLSVDSHHKWVQWITNTRQELG  |
| 239 | 0        | 152026929.gb  | ABS24697.1     | Peroxidase                                                    | Anaeromyxobacter sp. Fw109-5         | FSHPADFTPVCITTEFLSVDSHHKWVQWITNTRQELG  |
| 240 | 0        | 148501832.gb  | ABO70086.1     | Peroxiredoxin                                                 | Sphingomonas wittichii RW1           | QIGDFSHPADFTPVCITSEFLSVDHGLWIRAIQVTVG  |
| 241 | 6.91E-13 | 119180473.ref | XP_001241702.1 | 1-Cys peroxidoxin                                             | Sphingomonas wittichii RW1           | QIGDFSHPADFTPVCITSEFLSVDHGLWIRAIQVTVG  |
| 242 | 0        | 90300489.gb   | EAS30119.1     | hypothetical protein CIMG_08865                               | Coccidioides immitis RS              | GEIDFSDPDDFTPCTCTELLANSANSHDHWIKDIASGR |
| 243 | 0        | 120553196.ref | YP_957547.1    | Peroxidase                                                    | Coccidioides immitis RS              | GEIDFSDPDDFTPCTCTELLANSANSHDHWIKDIASGR |
| 244 | 0        | 120323045.gb  | ABM17360.1     | Peroxidase                                                    | Mairinobacter aquaeolei VT8          | FSHPADFTPVCITTEFLSVDSHHKWIKIDISLTVR    |
| 245 | 0        | 41614986.ref  | NP_963484.1    | 1-Cys peroxidoxin                                             | Mairinobacter aquaeolei VT8          | FSHPADFTPVCITTEFLSVDSHHKWIKIDISLTVR    |
| 246 | 0        | 56749769.sp   | Q74NC6         | hypothetical protein NEQ0191                                  | Nanoarchaeum equitians Kin4-M        | FSHPADFTPVCITTEFLSVDSHHKWIEWIGELTNTVR  |
| 247 | 0        | 40068710.gb   | AAR39045.1     | TDXH_NANEQ Probable peroxidoxin                               | Nanoarchaeum equitians Kin4-M        | FSHPADFTPVCITTEFLSVDSHHKWIEWIGELTNTVR  |
| 248 | 0        | 110833569.ref | YP_692428.1    | oxido-reductase                                               | Nanoarchaeum equitians Kin4-M        | FSHPADFTPVCITTEFLSVDSHHKWIEWIGELTNTVR  |
| 249 | 0        | 110846680.emb | CAL16156.1     | oxido-reductase                                               | Alcanivorax borkumensis SK2          | FSHPADFTPVCITTEFLSVDSHHKWIEWIGELTNTVR  |
| 250 | 2.02E-18 | 58376628.ref  | XP_308753.2    | thioredoxin-dependent peroxidase (AGAP007020-PA)              | Anopheles gambiae str. PEST          | FSHPADFTPVCITTEFLSVDSHHKWIEWIGELTNTVR  |
| 251 | 0        | 55245632.gb   | EAA04146.2     | thioredoxin-dependent peroxidase (AGAP007020-PA)              | Anopheles gambiae str. PEST          | FSHPADFTPVCITTEFLSVDSHHKWIEWIGELTNTVR  |
| 252 | 0        | 114563153.ref | YP_750666.1    | Peroxidase                                                    | Shewanella frigidimarina NCIMB 400   | FSHPADFTPVCITTEFLSVDSHHKWIEWIGELTNTVR  |
| 253 | 0        | 114334446.gb  | ABI71828.1     | Peroxidase                                                    | Shewanella frigidimarina NCIMB 400   | FSHPADFTPVCITTEFLSVDSHHKWIEWIGELTNTVR  |
| 254 | 0        | 158308632.gb  | ABW30449.1     | alkyl hydroperoxide reductase/Thiol specific antioxidant      | Acaryochloris marina MBIC11017       | FSHPADFTPVCITTEFLSVDSHHKWIEWIGELTNTVR  |
| 255 | 0        | 42525530.ref  | NP_970628.1    | alkyl hydroperoxide reductase/Thiol specific antioxidant      | Treponema denticola ATCC 35405       | FSHPADFTPVCITTEFLSVDSHHKWIEWIGELTNTVR  |
| 256 | 0        | 41815541.gb   | AA510509.1     | alkyl hydroperoxide reductase/peroxidoxin                     | Treponema denticola ATCC 35405       | FSHPADFTPVCITTEFLSVDSHHKWIEWIGELTNTVR  |
| 257 | 0        | 34206039.gb   | AAC31902.1     | Lsra                                                          | Pseudomonas putida                   | FSHPADFTPVCITTEFLSVDSHHKWIEWIGELTNTVR  |
| 258 | 0        | 163857363.ref | YP_001631661.1 | antioxidant protein                                           | Bordetella petrii                    | FSHPADFTPVCITTEFLSVDSHHKWIEWIGELTNTVR  |
| 259 | 0        | 163261091.emb | CAP43393.1     | antioxidant protein                                           | Bordetella petrii                    | FSHPADFTPVCITTEFLSVDSHHKWIEWIGELTNTVR  |
| 260 | 0        | 15221082.ref  | NP_175247.1    | ATPER1 (Arabidopsis thaliana 1-cysteine peroxidoxin)          | Arabidopsis thaliana                 | FSHPADFTPVCITTEFLSVDSHHKWIEWIGELTNTVR  |
| 261 | 0        | 3122659.sp    | O04005         | REHY_ARATH1-Cys peroxidoxin PER1 (Thioredoxin P)              | Arabidopsis thaliana                 | FSHPADFTPVCITTEFLSVDSHHKWIEWIGELTNTVR  |
| 262 | 0        | 8778528.gb    | AAF79536.1     | AC023673_24 F2TD18.15                                         | Arabidopsis thaliana                 | FSHPADFTPVCITTEFLSVDSHHKWIEWIGELTNTVR  |
| 263 | 0        | 19226269.emb  | CAA72804.1     | peroxidoxin                                                   | Arabidopsis thaliana                 | FSHPADFTPVCITTEFLSVDSHHKWIEWIGELTNTVR  |
| 264 | 0        | 70922647.ref  | XP_734457.1    | hypothetical protein PC300878.00.0                            | Plasmodium chabaudi                  | FSHPADFTPVCITTEFLSVDSHHKWIEWIGELTNTVR  |
| 265 | 3.03E-18 | 56507214.emb  | CAH84156.1     | hypothetical protein PC300878.00.0                            | Plasmodium chabaudi                  | FSHPADFTPVCITTEFLSVDSHHKWIEWIGELTNTVR  |
| 266 | 0        | 3318841.pdb   | 1PRX           | A Chain A_Horfb A Novel Human Peroxidase Enzyme               | Homo sapiens                         | FSHPADFTPVCITTEFLSVDSHHKWIEWIGELTNTVR  |
| 267 | 0        | 3318842.pdb   | 1PRX           | B Chain B_Horfb A Novel Human Peroxidase Enzyme               | Homo sapiens                         | FSHPADFTPVCITTEFLSVDSHHKWIEWIGELTNTVR  |
| 268 | 4.12E-17 | 109076440.ref | XP_001095722.1 | PREDICTED: similar to Peroxidoxin-6 (Antioxidant protein)     | Macaca mulatta                       | FSHPADFTPVCITTEFLSVDSHHKWIEWIGELTNTVR  |
| 269 | 0        | 126458809.ref | YP_001055087.1 | Peroxidase                                                    | Pyrobaculum caldifontis JCM 11548    | FSHPADFTPVCITTEFLSVDSHHKWIEWIGELTNTVR  |
| 270 | 0        | 126248530.gb  | ABO07621.1     | 3-Cys thioredoxin peroxidase                                  | Pyrobaculum caldifontis JCM 11548    | FSHPADFTPVCITTEFLSVDSHHKWIEWIGELTNTVR  |
| 271 | 0        | 113934138.ref | YP_01420039.1  | Peroxidase                                                    | Caulobacter sp. K31                  | FSHPADFTPVCITTEFLSVDSHHKWIEWIGELTNTVR  |
| 272 | 0        | 166229287.emb | CAK22382.1     | non-selenium glutathione peroxidase                           | Caulobacter sp. K31                  | FSHPADFTPVCITTEFLSVDSHHKWIEWIGELTNTVR  |
| 273 | 0        | 68552168.ref  | YP_00591560.1  | Peroxidase                                                    | Crossospora gigas                    | FSHPADFTPVCITTEFLSVDSHHKWIEWIGELTNTVR  |
| 274 | 0        | 68240983.gb   | EAN2352.1      | Peroxidase                                                    | Prosthecochloris aestuarii DSM 271   | FSHPADFTPVCITTEFLSVDSHHKWIEWIGELTNTVR  |
| 275 | 0        | 126661298.ref | YP_017323368.1 | rehydrin                                                      | Cyanothece sp. CCY0110               | FSHPADFTPVCITTEFLSVDSHHKWIEWIGELTNTVR  |
| 276 | 0        | 126617422.gb  | EAZ86221.1     | rehydrin                                                      | Cyanothece sp. CCY0110               | FSHPADFTPVCITTEFLSVDSHHKWIEWIGELTNTVR  |
| 277 | 2.10E-14 | 134733217.ref | NP_104784.1    | similar to thiol-specific antioxidant enzyme such as rehydrin | Mesorhizobium loti MAFF303099        | FSHPADFTPVCITTEFLSVDSHHKWIEWIGELTNTVR  |
| 278 | 0        | 14023965.dbl  | BAB50570.1     | ml13745                                                       | Mesorhizobium loti MAFF303099        | FSHPADFTPVCITTEFLSVDSHHKWIEWIGELTNTVR  |
| 279 | 0        | 89056517.ref  | YP_511968.1    | Peroxidase                                                    | Jannaschia sp. CCS1                  | FSHPADFTPVCITTEFLSVDSHHKWIEWIGELTNTVR  |
| 280 | 0        | 88866066.gb   | ABD56943.1     | 1-Cys peroxidoxin                                             | Jannaschia sp. CCS1                  | FSHPADFTPVCITTEFLSVDSHHKWIEWIGELTNTVR  |
| 281 | 0        | 83748986.ref  | YP_00945994.1  | Peroxiredoxin                                                 | Ralstonia solanacearum UW551         | FSHPADFTPVCITTEFLSVDSHHKWIEWIGELTNTVR  |
| 282 | 0        | 83724324.gb   | EAP71494.1     | Peroxiredoxin                                                 | Ralstonia solanacearum UW551         | FSHPADFTPVCITTEFLSVDSHHKWIEWIGELTNTVR  |
| 283 | 0        | 149058260.gb  | EDM09417.1     | peroxidoxin 6, isoform CRA_b                                  | Rattus norvegicus                    | FSHPADFTPVCITTEFLSVDSHHKWIEWIGELTNTVR  |
| 284 | 0        | 118038551.ref | YP_01509955.1  | alkyl hydroperoxide reductase/Thiol specific antioxidant      | Burkholderia phytofirmans PsJN       | FSHPADFTPVCITTEFLSVDSHHKWIEWIGELTNTVR  |

|     |          |               |                |                                                                |                                         |  |  |                                          |
|-----|----------|---------------|----------------|----------------------------------------------------------------|-----------------------------------------|--|--|------------------------------------------|
| 260 |          | 117991214.gb  | EAV05508.1     | alkyl hydroperoxide reductase/Thiol specific antioxidant/      | Burkholderia phytofirmans PsJN          |  |  | FSHPDRFTPVCTTELLSIDDHLAWSKDIAEKDPVTAR    |
|     | 0        | 47586338.ref  | NP_004896.1    | peroxidoxin 6                                                  | Homo sapiens                            |  |  |                                          |
|     |          | 114565483.ref | XP_524972.2    | PREDICTED: peroxidoxin 6 isoform 2                             | Pan troglodytes                         |  |  |                                          |
|     |          | 114621471.ref | XP_001143738.1 | PREDICTED: similar to KIAA0106                                 | Pan troglodytes                         |  |  |                                          |
|     |          | 1718024.sp    | P30041         | PRDX6_HUMAN Peroxidoxin-6 (Antioxidant protein 2)              | Homo sapiens                            |  |  |                                          |
|     |          | 285949.gb     | BAA03496.1     | KIAA0106                                                       | Homo sapiens                            |  |  |                                          |
|     |          | 23274223.gb   | AAH35857.1     | Peroxidoxin 6                                                  | Homo sapiens                            |  |  |                                          |
|     |          | 31657160.gb   | AAH53550.1     | Peroxidoxin 6                                                  | Homo sapiens                            |  |  |                                          |
|     |          | 56204402.emb  | CAI20936.1     | peroxidoxin 6                                                  | Homo sapiens                            |  |  |                                          |
|     |          | 77744395.gb   | ABB02185.1     | peroxidoxin 6                                                  | Homo sapiens                            |  |  |                                          |
|     |          | 119611350.gb  | EAW90944.1     | peroxidoxin 6, isoform CRA_a                                   | Homo sapiens                            |  |  |                                          |
|     |          | 119611351.gb  | EAW90945.1     | peroxidoxin 6, isoform CRA_a                                   | Homo sapiens                            |  |  |                                          |
|     |          | 158259727.gb  | BAF82041.1     | unnamed protein product                                        | Homo sapiens                            |  |  |                                          |
| 261 | 7.48E-10 | 149202847.ref | ZP_01879818.1  | Peroxidoxin, AhpC/Tsa family protein                           | Roseovarius sp. TM1035                  |  |  | SLRKTWKVLQGLTFSHPAAFTPVCTTEIALTASFLLD    |
|     |          | 149143393.gb  | EDM31429.1     | peroxidoxin 6                                                  | Roseovarius sp. TM1035                  |  |  |                                          |
| 262 | 0        | 54303989.emb  | CAH59743.1     | peroxidoxin 6                                                  | Homo sapiens                            |  |  | TTVGRFSHPDRFTPVCTTELLSIDDHLAWSKDITTEKL   |
| 263 | 0        | 66521517.ref  | XP_395319.2    | PREDICTED: similar to Peroxidoxin-6 (Antioxidant protein 2)    | Apis mellifera                          |  |  | FSHPNDFTPVCTTELLSCNSHRKWKIEDLGMPLMTAR    |
| 264 | 0        | 3789944.gb    | AAC67563.1     | 1-Cys peroxidoxin protein 2                                    | Mus musculus                            |  |  | FSHPDRFTPVCTTELLSIDDHLAWSKDIVEKDPVTAR    |
| 265 | 0        | 6671549.ref   | NP_031479.1    | peroxidoxin 6                                                  | Mus musculus                            |  |  | FSHPDRFTPVCTTELLSIDDHLAWSKDIVEKDPVTAR    |
|     |          | 3719451.gb    | AAC63376.1     | 1-Cys peroxidoxin                                              | Mus musculus                            |  |  |                                          |
|     |          | 15488685.gb   | AAH13489.1     | Peroxidoxin 6                                                  | Mus musculus                            |  |  |                                          |
|     |          | 26326417.gb   | BAC28952.1     | unnamed protein product                                        | Mus musculus                            |  |  |                                          |
|     |          | 38174148.gb   | AAH61181.1     | Peroxidoxin 6                                                  | Mus musculus                            |  |  |                                          |
|     |          | 74179990.gb   | BAE36544.1     | unnamed protein product                                        | Mus musculus                            |  |  |                                          |
|     |          | 74180578.gb   | BAE34210.1     | unnamed protein product                                        | Mus musculus                            |  |  |                                          |
| 266 | 0        | 150400760.ref | YP_001324526.1 | peroxidoxin                                                    | Methanococcus aeolicus Nankai-1         |  |  | FSHPADFTPVCTTEFLSIDDHLKWIEWILGMVNNIVR    |
| 267 | 6.63E-16 | 163953238.ref | ABR55914.1     | alkyl hydroperoxide reductase/Thiol specific antioxidant/      | Methanococcus aeolicus Nankai-3         |  |  | PATERFSHPADFTPVCTSEFLSVDSHSLAWAHNIYGLM   |
|     |          | 163664843.gb  | ABY32210.1     | Peroxidoxin                                                    | Methylobacterium extorquens PA1         |  |  |                                          |
|     |          | 91788241.ref  | YP_549193.1    | Peroxidase                                                     | Polaromonas sp. JS666                   |  |  | FSHPADFTPVCTTEFLSVDSHGKWWHDITATVRQLTD    |
|     |          | 91697466.gb   | ABE44295.1     | 1-Cys peroxidoxin                                              | Polaromonas sp. JS666                   |  |  | FSHPGDFTPVCTTELLSCDSHKEWIKDIDEKANTGR     |
| 269 | 0        | 109631628.gb  | ABG35988.1     | glutathione peroxidase                                         | Helianthus annuus                       |  |  |                                          |
|     |          | 109631630.gb  | ABG35989.1     | glutathione peroxidase                                         | Helianthus annuus                       |  |  |                                          |
|     |          | 109631640.gb  | ABG35994.1     | glutathione peroxidase                                         | Helianthus annuus                       |  |  |                                          |
|     |          | 109631642.gb  | ABG35995.1     | glutathione peroxidase                                         | Helianthus annuus                       |  |  |                                          |
| 270 | 0        | 47523870.ref  | NP_989573.1    | peroxidoxin 6                                                  | Sus scrofa                              |  |  | FSHPDRFTPVCTTELLSIDDHLAWSKDIAEKDPVTAR    |
|     |          | 75074817.sp   | Q9TSX9         | PRDX6_PIG Peroxidoxin-6 (Non-selenium glutathione peroxidase)  | Sus scrofa                              |  |  |                                          |
|     |          | 6689393.emb   | CAB65456.1     | non-selenium glutathione phospholipid hydroperoxide peroxidase | Sus scrofa                              |  |  |                                          |
| 271 | 0        | 110639833.ref | YP_680043.1    | peroxidoxin                                                    | Cytophaga hutchinsonii ATCC 33406       |  |  | FSHPADYTPVCTTEFLFKRLSVDSHGKWKIKDIFTVR    |
|     |          | 110282514.gb  | ABG60700.1     | peroxidoxin                                                    | Cytophaga hutchinsonii ATCC 33406       |  |  |                                          |
| 272 | 0        | 121720168.ref | XP_001276782.1 | AhpC/TSA family thioresoxin peroxidase, putative               | Aspergillus clavatus NRRL 1             |  |  | GEIDFSHPADFTPVCTTELLSADSHGDWVKDIPFTIR    |
|     |          | 119404994.gb  | EAW15356.1     | AhpC/TSA family thioresoxin peroxidase, putative               | Aspergillus clavatus NRRL 1             |  |  |                                          |
| 273 | 0        | 1710077.sp    | P52572         | REHY_HORVU 1-Cys peroxidoxin PER1 (Thioresoxin)                | Hordeum vulgare subsp. vulgare          |  |  | FSHPGDFTPVCTTELLSICSDSHKEWTKDIDEKDLLTAA  |
|     |          | 471321.emb    | CAA54066.1     | HVB15C                                                         | Hordeum vulgare subsp. vulgare          |  |  |                                          |
|     |          | 1694833.emb   | CAA65387.1     | peroxidoxin                                                    | Hordeum vulgare subsp. vulgare          |  |  |                                          |
| 274 | 0        | 119859396.ref | ZP_01640811.1  | Peroxidase                                                     | Pseudomonas putida W619                 |  |  | FSHPADFTPVCTTELLKLDLSDVSHHKWIEDITLTVR    |
|     |          | 119814209.gb  | EAX16970.1     | Peroxidase                                                     | Pseudomonas putida W619                 |  |  |                                          |
| 275 | 0        | 146417033.ref | XP_001484486.1 | hypothetical protein PGUG_03867                                | Pichia guilliermondii ATCC 6260         |  |  | OQKIFSHPADFTPVCTTELLSHNDWIKDIVATVRLPID   |
|     |          | 146391611.gb  | EDK39769.1     | hypothetical protein PGUG_03867                                | Pichia guilliermondii ATCC 6260         |  |  |                                          |
| 276 | 7.47E-17 | 154282888.gb  | AAK97814.1     | AF209911_1 glutathione peroxidase                              | Ipodex scapularis                       |  |  | FSHPADYTPVCTTEFLSICSDSHRHWIKDIVEKDPDLCR  |
| 277 | 0        | 971280.gb     | BAA09947.1     | RAB24 protein                                                  | Oryza sativa ( Japonica cultivar-group) |  |  | GLTIGFSPGDFTPVCTTELLSICSDSHKDWKIDIDEKD   |
| 278 | 0        | 86750132.ref  | YP_486628.1    | Peroxidase                                                     | Rhodospseudomonas palustris Ha2         |  |  | FSHPADFTPVCTTEMLSTDEHLKWAADVTAAVRQGED    |
|     |          | 86573160.gb   | ABD07717.1     | 1-Cys peroxidoxin                                              | Rhodospseudomonas palustris Ha2         |  |  |                                          |
| 279 | 0        | 82796374.gb   | ABB91779.1     | glutathione peroxidase                                         | Hymenocidon perlevis                    |  |  | FSADFSPADYTPVCTTELLSHKGWIGDIAEKDPLTAR    |
| 280 | 0        | 25153708.ref  | NP_741287.1    | PerOxireDoXin family member (prdx-6)                           | Caenorhabditis elegans                  |  |  | FSHPADFTPVCTTELLSIDTHRDWAKDILGMICLSAR    |
|     |          | 22532820.gb   | AAM97968.1     | Peroxidoxin protein 6                                          | Caenorhabditis elegans                  |  |  |                                          |
| 281 | 0        | 14285791.sp   | Q9HXX0         | TDXH1_THEAC Probable peroxidoxin 1                             | Thermoplasma acidophilum                |  |  | FSHPGDFTPVCTTEFLSVDSHHWEWVWILGMTSTVR     |
| 282 | 0        | 149241041.ref | XP_001479521.1 | PREDICTED: similar to non-selenium glutathione peroxidase      | Mus musculus                            |  |  | TTIGRFSHPDRFTPVCTTELLSIDDHLAWSKDIVEKSGKK |
| 284 | 0        | 47193903.emb  | CAF91861.1     | unnamed protein product                                        | Tetraodon nigroviridis                  |  |  | FSHPKDFTPVCTTELLSIDDHCSWSKDWLGMPLTAR     |
| 285 | 0        | 115422452.emb | CAJ48977.1     | antioxidant protein                                            | Bordetella avium 197N                   |  |  | FSHPADFTPVCTTELLSVDSHKQWIDDITLTVRQLTD    |
| 286 | 0        | 82540481.ref  | XP_724555.1    | 1-cys peroxidoxin                                              | Plasmodium yoelii str. 17XNL            |  |  | FSHPNDFTPVCTTEFLSCNSHDKWIDIEKQDPLCR      |
|     |          | 56967056.pdb  | 1XCC           | A Chain A, 1-Cys Peroxidoxin From Plasmodium Yoelii            | Plasmodium Yoelii                       |  |  |                                          |
|     |          | 56967057.pdb  | 1XCC           | B Chain B, 1-Cys Peroxidoxin From Plasmodium Yoelii            | Plasmodium Yoelii                       |  |  |                                          |
|     |          | 56967058.pdb  | 1XCC           | C Chain C, 1-Cys Peroxidoxin From Plasmodium Yoelii            | Plasmodium Yoelii                       |  |  |                                          |

|     |          |           |     |                                                            |                                                         |  |                                          |
|-----|----------|-----------|-----|------------------------------------------------------------|---------------------------------------------------------|--|------------------------------------------|
|     |          |           |     | D Chain D, 1-Cys Peroxidoxin From Plasmodium Yoelli        | Plasmodium Yoelli                                       |  |                                          |
|     |          |           |     | 1-cys peroxidoxin                                          | Plasmodium yoelii yoelii                                |  |                                          |
|     |          |           |     | 1-cys peroxidoxin                                          | Plasmodium yoelii                                       |  |                                          |
|     |          |           |     | putative alkyl hydroperoxide reductase                     | Janibacter sp. HTCC2649                                 |  | FSHPADFTPVCITTEALADVSVDDHNAWKKDITEDAR    |
| 287 | 0        | 84496442  | ref | putative alkyl hydroperoxide reductase                     | Janibacter sp. HTCC2649                                 |  | FSHPADFTPVCITTEALADVSVDDHNAWKKDITEDAR    |
| 288 | 0        | 84383210  | gb  | putative alkyl hydroperoxide reductase                     | Janibacter sp. HTCC2649                                 |  | FSHPADFTPVCITTEALADVSVDDHNAWKKDITEDAR    |
| 289 | 0        | 158309602 | ref | peroxidase/ antioxidant protein                            | Acaryochloris marina MBIC11017                          |  | QLGDFSHFPADYTPVCTTEFLSVDSHGKGVNDIKVTVR   |
| 290 | 0        | 158309602 | gb  | peroxidase/ antioxidant protein                            | Acaryochloris marina MBIC11017                          |  | QLGDFSHFPADYTPVCTTEFLSVDSHGKGVNDIKVTVR   |
| 291 | 0        | 119873344 | ref | Peroxidase                                                 | Pyrobaculum islandicum DSM 4184                         |  | LGWKF-SHPGDFTPVCTTEFLSVDSHIEWKROITATVR   |
| 292 | 2.78E-13 | 119874752 | gb  | 3-Cys thioredoxin peroxidase                               | Pyrobaculum islandicum DSM 4184                         |  | LGWKF-SHPGDFTPVCTTEFLSVDSHIEWKROITATVR   |
| 293 | 0        | 91076594  | ref | PREDICTED: similar to CG11765-PA                           | Tribolium castaneum                                     |  | FSHPADFTPVCITTEFLHSCDDHVDVWVNDIQHKDALTVR |
| 294 | 0        | 6850638   | ref | Alkyl hydroperoxide reductase/ Thiol specific antioxidant  | Peledicyon phaeocliathiforme BU-1                       |  | FSHPADFTPVCITTEFLHSCDDHVDVWVNDIQHKDALTVR |
| 295 | 0        | 68242488  | gb  | Alkyl hydroperoxide reductase/ Thiol specific antioxidant  | Peledicyon phaeocliathiforme BU-1                       |  | FSHPADFTPVCITTEFLHSCDDHVDVWVNDIQHKDALTVR |
| 296 | 0        | 158420207 | ref | AhpC/TSA family protein                                    | Azorhizobium caulinodans ORS 571                        |  | FSHPADFTPVCITTEFLHSCDDHVDVWVNDIQHKDALTVR |
| 297 | 0        | 158328896 | gb  | AhpC/TSA family protein                                    | Azorhizobium caulinodans ORS 571                        |  | FSHPADFTPVCITTEFLHSCDDHVDVWVNDIQHKDALTVR |
| 298 | 0        | 149927284 | ref | thiol-specific antioxidant protein                         | Limnobacter sp. MED105                                  |  | QGSFFSHPKDFTPVCITTEFLSVDEHKEWKWDIGRTAA   |
| 299 | 0        | 149823989 | gb  | thiol-specific antioxidant protein                         | Limnobacter sp. MED105                                  |  | QGSFFSHPKDFTPVCITTEFLSVDEHKEWKWDIGRTAA   |
| 300 | 0        | 114327529 | ref | peroxidoxin                                                | Granulibacter beifresdensis CGDNIH1                     |  | FSHPADFTPVCITSEFLSVD/AHLAWRAIPHGVLEEML   |
| 301 | 0        | 114315703 | gb  | peroxidoxin                                                | Granulibacter beifresdensis CGDNIH1                     |  | FSHPADFTPVCITSEFLSVD/AHLAWRAIPHGVLEEML   |
| 302 | 0        | 163744084 | ref | thiol-specific antioxidant protein                         | Phaeobacter gallaeciensis 2.10                          |  | FSHPADFTPVCITTEFLSVDDHKKWKTDISATVROLKL   |
| 303 | 0        | 161382631 | gb  | thiol-specific antioxidant protein                         | Phaeobacter gallaeciensis 2.10                          |  | FSHPADFTPVCITTEFLSVDDHKKWKTDISATVROLKL   |
| 304 | 0        | 20092896  | ref | peroxidoxin                                                | Meihausarcina acetivorans C2A                           |  | QGMF-SHPADFTPVCITTEFLSIDSASHAWLRRTQAVR   |
| 305 | 0        | 19918204  | gb  | peroxidoxin (alkyl hydroperoxide reductase)                | Methanosarcina acetivorans C2A                          |  | QGMF-SHPADFTPVCITTEFLSIDSASHAWLRRTQAVR   |
| 306 | 0        | 50897519  | gb  | putative peroxidoxin                                       | Glossina morsitans morsitans                            |  | QGKIF-SHPGDTYTPVCTTEFLSCLDTHKGWIEDIPMTOR |
| 307 | 0        | 116792331 | gb  | unknown                                                    | Picea sitchensis                                        |  | QGKIF-SHPGDTYTPVCTTEFLSCLDTHKGWIEDIPMTOR |
| 308 | 0        | 50897519  | gb  | putative peroxidoxin                                       | Glossina morsitans morsitans                            |  | QGKIF-SHPGDTYTPVCTTEFLSCLDTHKGWIEDIPMTOR |
| 309 | 0        | 145244929 | ref | hypothetical protein An11g07650                            | Aspergillus niger                                       |  | FSHPNDFTPVCITTEFLSCLDRHKAWIEDIKDSVTVAR   |
| 310 | 0        | 134079427 | emb | unnamed protein product                                    | Aspergillus niger                                       |  | FSHPNDFTPVCITTEFLSCLDRHKAWIEDIKDSVTVAR   |
| 311 | 0        | 70733224  | ref | probable antioxidant protein                               | Pseudomonas fluorescens Pf-5                            |  | PLTRRQEQF-SHPADFTPVCITTEFLSANSHDQWIDDI   |
| 312 | 0        | 68347523  | gb  | probable antioxidant protein PA3450                        | Pseudomonas fluorescens Pf-5                            |  | PLTRRQEQF-SHPADFTPVCITTEFLSANSHDQWIDDI   |
| 313 | 0        | 58260742  | ref | thioredoxin peroxidase                                     | Cryptococcus neoformans var. neoformans JEC21           |  | FSHPADFTPVCITTEFLSANSHEGWIKDIYGMILPFTVR  |
| 314 | 0        | 134117465 | ref | hypothetical protein CNBK3300                              | Cryptococcus neoformans var. neoformans B-3501A         |  | FSHPADFTPVCITTEFLSANSHEGWIKDIYGMILPFTVR  |
| 315 | 0        | 50255243  | gb  | hypothetical protein CNBK3300                              | Cryptococcus neoformans var. neoformans B-3501A         |  | FSHPADFTPVCITTEFLSANSHEGWIKDIYGMILPFTVR  |
| 316 | 0        | 57229862  | gb  | thioredoxin peroxidase, putative peroxidoxin               | Cryptococcus neoformans var. neoformans JEC21           |  | FSHPADFTPVCITTEFLSANSHEGWIKDIYGMILPFTVR  |
| 317 | 0        | 14591037  | ref | peroxidoxin                                                | Pyrococcus horikoshii OT3                               |  | QGKWF-SHPADFTPVCITTEFLSVDSHSHKIEWITITAR  |
| 318 | 0        | 14285788  | sp  | TDXH_PYROHO Probable peroxidoxin                           | Pyrococcus horikoshii OT3                               |  | QGKWF-SHPADFTPVCITTEFLSVDSHSHKIEWITITAR  |
| 319 | 0        | 3257634   | gb  | 2 beta long hypothetical alkyl hydroperoxide reductase     | Pyrococcus horikoshii OT3                               |  | QGKWF-SHPADFTPVCITTEFLSVDSHSHKIEWITITAR  |
| 320 | 0        | 126008323 | ref | hypothetical protein Faci_03000959                         | Ferroplasma acidarmanus fer1                            |  | FSHPADFTPVCITTEFLSVDSHSHKIEWITITAR       |
| 321 | 0        | 148269266 | ref | peroxidoxin                                                | Thermotoga petrophila RKU-1                             |  | FSHPADFTPVCITTEFLSVDSHSHKIEWITITAR       |
| 322 | 0        | 147734810 | gb  | 1-Cys peroxidoxin / 3-Cys thioredoxin peroxidase           | Thermotoga petrophila RKU-1                             |  | FSHPADFTPVCITTEFLSVDSHSHKIEWITITAR       |
| 323 | 0        | 114565485 | ref | PREDICTED: peroxidoxin 6 isoform 1                         | Pan troglodytes                                         |  | FSHPADFTPVCITTEFLSVDSHSHKIEWITITAR       |
| 324 | 0        | 162460575 | ref | 1-Cys peroxidoxin antioxidant                              | Zea mays                                                |  | FSHPADFTPVCITTEFLSVDSHSHKIEWITITAR       |
| 325 | 0        | 146325682 | sp  | REHY_MAIZE 1-Cys peroxidoxin PER1 (Thioredoxin peroxidase) | Zea mays                                                |  | FSHPADFTPVCITTEFLSVDSHSHKIEWITITAR       |
| 326 | 0        | 87133468  | gb  | 1-Cys peroxidoxin antioxidant                              | Zea mays                                                |  | FSHPADFTPVCITTEFLSVDSHSHKIEWITITAR       |
| 327 | 0        | 124007607 | ref | peroxidase                                                 | Microscilla marina ATCC 23134                           |  | FSHPADFTPVCITTEFLSVDSHSHKIEWITITAR       |
| 328 | 0        | 123986908 | gb  | peroxidase                                                 | Microscilla marina ATCC 23134                           |  | FSHPADFTPVCITTEFLSVDSHSHKIEWITITAR       |
| 329 | 0        | 3024730   | sp  | TDXH_METTM Probable peroxidoxin                            | Methanothermobacter thermoautotrophicus BCP (7.083E-09) |  | LSIGF-SHPKDFTPVCTTEFLSKHLWVKDINQTVRQGD   |
| 330 | 0        | 620126    | emb | orfk                                                       | Methanothermobacter thermoautotrophicus BCP (7.083E-09) |  | LSIGF-SHPKDFTPVCTTEFLSKHLWVKDINQTVRQGD   |
| 331 | 0        | 75675930  | gb  | alkyl hydroperoxide reductase/ Thiol specific antioxidant  | Nitrobacter winogradskyi Nb-255                         |  | FSHPKNFTPICITTEFLSVDLHDAWAKDIYGMILNQTVR  |
| 332 | 0        | 74420800  | gb  | alkyl hydroperoxide reductase/ Thiol specific antioxidant  | Nitrobacter winogradskyi Nb-255                         |  | FSHPKNFTPICITTEFLSVDLHDAWAKDIYGMILNQTVR  |
| 333 | 0        | 111219797 | ref | Anti-oxidant protein, AhpC/TSA family.                     | Frankia alni ACN14a                                     |  | FSHPADFTPVCITTEFLSVDSHSHKIEWITITAR       |
| 334 | 0        | 111147329 | emb | Anti-oxidant protein, AhpC/TSA family.                     | Frankia alni ACN14a                                     |  | FSHPADFTPVCITTEFLSVDSHSHKIEWITITAR       |
| 335 | 0        | 158315461 | ref | Peroxidase                                                 | Frankia sp. EAN1pec                                     |  | FSHPADFTPVCITTEFLSVDSHSHKIEWITITAR       |
| 336 | 0        | 18810866  | gb  | Peroxidase                                                 | Frankia sp. EAN1pec                                     |  | FSHPADFTPVCITTEFLSVDSHSHKIEWITITAR       |
| 337 | 0        | 156548610 | ref | PREDICTED: similar to peroxidoxin                          | Nasonia vitripennis                                     |  | FSHPADFTPVCITTEFLSVDDHVDVWVNDIEGKDTSTGR  |
| 338 | 0        | 62005080  | gb  | 1-Cys peroxidoxin                                          | Taiwanofungus camphoratus                               |  | FSHPGDFTPVCITTEFLHKKWVGDIPFIRFVIDQLGD    |
| 339 | 0        | 109631620 | gb  | glutathione peroxidase                                     | Helianthus annuus                                       |  | FSHPGDFTPVCITTEFLHKKWVGDIPFIRFVIDQLGD    |
| 340 | 0        | 109631620 | gb  | glutathione peroxidase                                     | Helianthus annuus                                       |  | FSHPGDFTPVCITTEFLHKKWVGDIPFIRFVIDQLGD    |
| 341 | 0        | 109631622 | gb  | glutathione peroxidase                                     | Helianthus annuus                                       |  | FSHPGDFTPVCITTEFLHKKWVGDIPFIRFVIDQLGD    |
| 342 | 0        | 109631624 | gb  | glutathione peroxidase                                     | Helianthus annuus                                       |  | FSHPGDFTPVCITTEFLHKKWVGDIPFIRFVIDQLGD    |
| 343 | 0        | 109631626 | gb  | glutathione peroxidase                                     | Helianthus annuus                                       |  | FSHPGDFTPVCITTEFLHKKWVGDIPFIRFVIDQLGD    |
| 344 | 0        | 109631632 | gb  | glutathione peroxidase                                     | Helianthus annuus                                       |  | FSHPGDFTPVCITTEFLHKKWVGDIPFIRFVIDQLGD    |
| 345 | 0        | 109631634 | gb  | glutathione peroxidase                                     | Helianthus annuus                                       |  | FSHPGDFTPVCITTEFLHKKWVGDIPFIRFVIDQLGD    |
| 346 | 0        | 109631636 | gb  | glutathione peroxidase                                     | Helianthus annuus                                       |  | FSHPGDFTPVCITTEFLHKKWVGDIPFIRFVIDQLGD    |
| 347 | 0        | 109631638 | gb  | glutathione peroxidase                                     | Helianthus annuus                                       |  | FSHPGDFTPVCITTEFLHKKWVGDIPFIRFVIDQLGD    |
| 348 | 0        | 109631644 | gb  | glutathione peroxidase                                     | Helianthus annuus                                       |  | FSHPGDFTPVCITTEFLHKKWVGDIPFIRFVIDQLGD    |



|     |          |               |                |                                                                                     |                                        |                                     |
|-----|----------|---------------|----------------|-------------------------------------------------------------------------------------|----------------------------------------|-------------------------------------|
|     |          | 109631646.gb  | ABG35997.1     | glutathione peroxidase                                                              | Helianthus annuus                      | FSHPDRYTPVCTTELLSIDDHLSGWSKDIKDPVTR |
|     |          | 109631656.gb  | ABG36002.1     | glutathione peroxidase                                                              | Helianthus annuus                      |                                     |
|     |          | 109631658.gb  | ABG36003.1     | glutathione peroxidase                                                              | Helianthus annuus                      |                                     |
|     |          | 109631660.gb  | ABG36004.1     | glutathione peroxidase                                                              | Helianthus annuus                      |                                     |
|     |          | 109631662.gb  | ABG36005.1     | glutathione peroxidase                                                              | Helianthus annuus                      |                                     |
|     |          | 109631676.gb  | ABG36012.1     | glutathione peroxidase                                                              | Helianthus annuus                      |                                     |
|     |          | 109631678.gb  | ABG36013.1     | glutathione peroxidase                                                              | Helianthus annuus                      |                                     |
|     |          | 109631680.gb  | ABG36014.1     | glutathione peroxidase                                                              | Helianthus annuus                      |                                     |
|     |          | 109631682.gb  | ABG36015.1     | glutathione peroxidase                                                              | Helianthus annuus                      |                                     |
|     |          | 109631684.gb  | ABG36016.1     | glutathione peroxidase                                                              | Helianthus annuus                      |                                     |
|     |          | 109631686.gb  | ABG36017.1     | glutathione peroxidase                                                              | Helianthus annuus                      |                                     |
|     |          | 109631688.gb  | ABG36018.1     | glutathione peroxidase                                                              | Helianthus annuus                      |                                     |
|     |          | 109631690.gb  | ABG36019.1     | glutathione peroxidase                                                              | Helianthus annuus                      |                                     |
|     |          | 109631692.gb  | ABG36020.1     | glutathione peroxidase                                                              | Helianthus annuus                      |                                     |
|     |          | 109631694.gb  | ABG36021.1     | glutathione peroxidase                                                              | Helianthus annuus                      |                                     |
|     |          | 109631698.gb  | ABG36023.1     | glutathione peroxidase                                                              | Helianthus annuus                      |                                     |
|     |          | 109631704.gb  | ABG36026.1     | glutathione peroxidase                                                              | Helianthus annuus                      |                                     |
|     |          | 109631706.gb  | ABG36027.1     | glutathione peroxidase                                                              | Helianthus annuus                      |                                     |
|     |          | 109631708.gb  | ABG36028.1     | glutathione peroxidase                                                              | Helianthus annuus                      |                                     |
|     |          | 109631710.gb  | ABG36029.1     | glutathione peroxidase                                                              | Helianthus annuus                      |                                     |
| 317 | 1.05E-19 | 148233654.ref | NP_001084316.1 | peroxiredoxin 6                                                                     | Xenopus laevis                         |                                     |
|     |          | 32484266.gb   | AAH54278.1     | Prx6-prov protein                                                                   | Xenopus laevis                         |                                     |
| 318 | 2.73E-12 | 162149893.ref | YP_001604054.1 | putative peroxiredoxin protein                                                      | Glucacetobacter diazotrophicus PAI 5   |                                     |
|     |          | 161788170.emb | CAP57775.1     | putative peroxiredoxin protein                                                      | Glucacetobacter diazotrophicus PAI 5   |                                     |
| 319 | 0        | 33592121.ref  | NP_879765.1    | antioxidant protein                                                                 | Bordetella pertussis Tohama 1          |                                     |
|     |          | 33597648.ref  | NP_885291.1    | antioxidant protein                                                                 | Bordetella parapertussis 12822         |                                     |
|     |          | 33602427.ref  | NP_889987.1    | antioxidant protein                                                                 | Bordetella bronchiseptica RB50         |                                     |
|     |          | 33571765.emb  | CAE41266.1     | antioxidant protein                                                                 | Bordetella pertussis Tohama 1          |                                     |
|     |          | 33574076.emb  | CAE38400.1     | antioxidant protein                                                                 | Bordetella parapertussis               |                                     |
|     |          | 33576866.emb  | CAE33946.1     | antioxidant protein                                                                 | Bordetella bronchiseptica RB50         |                                     |
| 320 | 0        | 118033595.ref | ZP_01505037.1  | alkyl hydroperoxide reductase/Thiol specific antioxidant/Thiol specific antioxidant | Burkholderia phyatum STM1815           |                                     |
|     |          | 117980679.gb  | EAU95075.1     | alkyl hydroperoxide reductase/Thiol specific antioxidant                            | Burkholderia phyatum STM1815           |                                     |
| 321 | 0        | 7381260.gb    | AAF61460.1     | AF139817_1 peroxiredoxin antioxidant                                                | Brassica napus                         |                                     |
| 322 | 0        | 71024643.ref  | XP_762551.1    | hypothetical protein UM06404.1                                                      | Ustilago maydis 521                    |                                     |
|     |          | 46101944.gb   | EAK87177.1     | hypothetical protein UM06404.1                                                      | Ustilago maydis 521                    |                                     |
| 323 | 0        | 99079916.ref  | YP_612070.1    | Peroxidase                                                                          | Silicibacter sp. TM1040                |                                     |
|     |          | 99036196.gb   | ABF62808.1     | 1-Cys peroxiredoxin                                                                 | Silicibacter sp. TM1040                |                                     |
| 324 | 8.07E-14 | 116200704.ref | XP_001226164.1 | conserved hypothetical protein                                                      | Chaetomium globosum CBS 148.51         |                                     |
|     |          | 88175611.gb   | EAG83079.1     | conserved hypothetical protein                                                      | Chaetomium globosum CBS 148.51         |                                     |
| 325 | 0        | 18977405.ref  | NP_578762.1    | peroxiredoxin                                                                       | Pyrococcus furiosus DSM 3638           |                                     |
|     |          | 23822248.sp   | Q8U218         | TDXH_PYRFU Probable peroxiredoxin                                                   | Pyrococcus furiosus DSM 3638           |                                     |
|     |          | 18893092.gb   | AA181157.1     | alkyl hydroperoxide reductase                                                       | Pyrococcus furiosus DSM 3638           |                                     |
| 326 | 0        | 109631592.gb  | ABG35970.1     | glutathione peroxidase                                                              | Helianthus annuus                      |                                     |
|     |          | 109631594.gb  | ABG35971.1     | glutathione peroxidase                                                              | Helianthus annuus                      |                                     |
| 327 | 0        | 126464970.ref | YP_001040079.1 | alkyl hydroperoxide reductase/Thiol specific antioxidant/Thiol specific antioxidant | Staphylothermus marinus F1             |                                     |
|     |          | 126013793.gb  | ABN69171.1     | 1-Cys peroxiredoxin / 3-Cys thioredoxin peroxidase                                  | Staphylothermus marinus F1             |                                     |
| 328 | 0        | 89070989.ref  | ZP_01158212.1  | thiol-specific antioxidant protein                                                  | Oceanicola granulosa HTCC2516          |                                     |
|     |          | 89043452.gb   | EAR49667.1     | thiol-specific antioxidant protein                                                  | Oceanicola granulosa HTCC2516          |                                     |
| 329 | 3.48E-13 | 85708202.ref  | ZP_01039268.1  | probable antioxidant protein                                                        | Erythrobacter sp. NAP1                 |                                     |
|     |          | 856869736.gb  | EAG29739.1     | probable antioxidant protein                                                        | Erythrobacter sp. NAP1                 |                                     |
| 330 | 0        | 88792731.ref  | ZP_01108449.1  | alkyl hydroperoxide reductase                                                       | Alteromonas macleodii 'Deep ecotype'   |                                     |
|     |          | 88775781.gb   | EAR07028.1     | alkyl hydroperoxide reductase                                                       | Alteromonas macleodii 'Deep ecotype'   |                                     |
| 331 | 2.06E-13 | 110636412.ref | YP_676620.1    | alkyl hydroperoxide reductase/Thiol specific antioxidant/Thiol specific antioxidant | Mesorhizobium sp. BNC1                 |                                     |
|     |          | 110287396.gb  | ABG65455.1     | alkyl hydroperoxide reductase/Thiol specific antioxidant/Thiol specific antioxidant | Mesorhizobium sp. BNC1                 |                                     |
| 332 | 0        | 56751666.ref  | YP_172367.1    | antioxidant protein: rehydrin                                                       | Synechococcus elongatus PCC 6301       |                                     |
|     |          | 56866625.ubj  | BAD79847.1     | antioxidant protein: rehydrin                                                       | Synechococcus elongatus PCC 6301       |                                     |
| 333 | 0        | 152981345.ref | YP_001355069.1 | antioxidant protein LsfA                                                            | Janthinobacterium sp. Marseille        |                                     |
|     |          | 151281422.gb  | ABR89832.1     | antioxidant protein LsfA                                                            | Janthinobacterium sp. Marseille        |                                     |
| 334 | 0        | 12229556.sp   | O17433         | 1CPX_DIRIM 1-Cys peroxiredoxin (Thioredoxin peroxidase)                             | Dirofilaria immitis                    |                                     |
|     |          | 2598122.gb    | AA883998.1     | 1-cys peroxidoxin                                                                   | Dirofilaria immitis                    |                                     |
| 335 | 0        | 125601238.gb  | EAZ408.14      | hypothetical protein OsJ_024297                                                     | Oryza sativa (japonica cultivar-group) |                                     |
| 336 | 2.15E-15 | 146412027.ref | XP_001481985.1 | conserved hypothetical protein                                                      | Pichia guilliermondii ATCC 6260        |                                     |
|     |          | 146393492.gb  | EDK41650.1     | conserved hypothetical protein                                                      | Pichia guilliermondii ATCC 6260        |                                     |
| 337 | 0        | 110589040.gb  | ABG77029.1     | peroxiredoxin 6                                                                     | Ictalurus punctatus                    |                                     |

|     |          |           |       |                |                                                         |                                      |                                         |
|-----|----------|-----------|-------|----------------|---------------------------------------------------------|--------------------------------------|-----------------------------------------|
| 338 | 0        | 126306245 | [ref] | XP_001368252.1 | PREDICTED: similar to non-selenium glutathione phospho  | Monodelphis domestica                | FSHPDRFDPVCTTELLSIDDHLAWCKDILGMLPVTAR   |
| 339 | 0        | 15920801  | [ref] | NP_376470.1    | putative peroxiredoxin                                  | Sulfolobus tokodaii str. 7           | FYKDFAHPADFTPVCTTEFLSVDSHIQWMLDIPVIAD   |
|     |          | 23822259  | [sp]  | Q87438         | TDXH1_SULTO Probable peroxiredoxin 1                    | Sulfolobus tokodaii str. 7           |                                         |
|     |          | 15621585  | [db]  | BAB65579.1     | 215aa long hypothetical peroxiredoxin                   | Sulfolobus tokodaii str. 7           |                                         |
| 340 | 0        | 159027193 | [emb] | CAG086827.1    | unnamed protein product                                 | Microcystis aeruginosa PCC 7806      | QLGDFSHPADYTPVCTTELLSVDSHRGWINDIINTVR   |
| 341 | 0        | 166043149 | [gb]  | ABK008392.1    | peroxiredoxin 6-related sequence 1                      | Mus spicilegius                      | FSHPKDFTPVCTTELLSIDDHLAWSKDIWEKDKPLTAR  |
| 342 | 0        | 145590729 | [ref] | YP_001152731.1 | Peroxidase                                              | Pyrobaculum arsenaticum DSM 13514    | LGMQFSPHGDFTPVCTTEFLSVDSHSHWKRQIITVR    |
|     |          | 145282497 | [gb]  | ABP50079.1     | 3-Cys thioredoxin peroxidase                            | Pyrobaculum arsenaticum DSM 13514    |                                         |
| 343 | 0        | 91790663  | [ref] | YP_551615.1    | Peroxidase                                              | Polaromonas sp. JS666                | QGTVRFSPHKDFTPVCTTELLSVDNHTRWARDIQGHL   |
|     |          | 91699888  | [gb]  | ABE46717.1     | Peroxidase                                              | Polaromonas sp. JS666                |                                         |
| 344 | 0        | 126667741 | [ref] | ZP_01738709.1  | thiol-specific antioxidant protein                      | Mairinobacter sp. ELB17              | DGKIFSHPKDFTPVCTTEFVSVDHVKWKRDISATVR    |
|     |          | 126627844 | [gb]  | EAZ98473.1     | thiol-specific antioxidant protein                      | Mairinobacter sp. ELB17              |                                         |
| 345 | 0        | 66468789  | [gb]  | AAF21098.1     | AF045165_1 thioredoxin peroxidase                       | Brugia malayi                        | IGKDFSHPRDFTPVCTTELLSDDSHRHWADDIAL TAR  |
| 346 | 2.70E-14 | 32140415  | [gb]  | AAP68995.1     | thiol-specific antioxidant protein 3                    | Cryptococcus neoformans var. grubii  | FSHPDDYTPVCTTELLSANSHEGWIKDIYGMILPFTVR  |
| 347 | 0        | 88603970  | [ref] | YP_504148.1    | Peroxidase                                              | Methanospirillum hungatei JF-1       | HGKLFSPADFTPVCTTEFLSIDSLSHLAWMNVTAAYR   |
|     |          | 88189432  | [gb]  | ABD42429.1     | 3-Cys thioredoxin peroxidase                            | Methanospirillum hungatei JF-1       |                                         |
| 348 | 0        | 202808569 | [ref] | NP_623740.1    | peroxiredoxin                                           | Thermoanaerobacter tengcongensis MB4 | FSHPGDFTPVCTTEFLSVDSHLAWVENIEDKDTSAVR   |
|     |          | 6287900   | [sp]  | Q8R844         | TDXH2_THE1N Probable peroxiredoxin 2                    | Thermoanaerobacter tengcongensis MB4 |                                         |
|     |          | 20517196  | [gb]  | AAI25344.1     | Peroxiredoxin                                           | Thermoanaerobacter tengcongensis MB4 |                                         |
| 349 | 0        | 156059969 | [ref] | XP_001595907.1 | mitochondrial peroxiredoxin PRX1                        | Sclerotinia sclerotiorum 1980        | PRTLRF-SHPADFTPVCTTELLKLDLSADSHKEWIKDI  |
|     |          | 154699531 | [gb]  | EDN9269.1      | mitochondrial peroxiredoxin PRX1                        | Sclerotinia sclerotiorum 1980        |                                         |
| 350 | 0        | 126134331 | [ref] | XP_001383690.1 | hypothetical protein PICST_7026                         | Pichia stipitis CBS 6054             | FSHPADFTPVCTTELLSHNQWIKDIFTVRFVLDGLAD   |
|     |          | 126095639 | [gb]  | ABN65661.1     | predicted protein                                       | Pichia stipitis CBS 6054             | IGKDFSHPRDFTPVCTTELLSDDSHSKWADDITLTAR   |
| 351 | 0        | 1717796   | [sp]  | P52570         | TSA_ONCVO Putative peroxiredoxin (Thioredoxin peroxi    | Onchocerca volvulus                  |                                         |
|     |          | 903684    | [gb]  | AAC27392.1     | thiol-specific antioxidant                              | Onchocerca volvulus                  |                                         |
| 352 | 0        | 160901880 | [ref] | YP_001567461.1 | alkyl hydroperoxide reductase/Thiol specific antioxi    | Petrogala mobilis SJ95               | LPKDFSHPGDFTPVCTTEFLSVDSHIKWMEWISATVR   |
|     |          | 160359524 | [gb]  | ABX31138.1     | alkyl hydroperoxide reductase/Thiol specific antioxi    | Petrogala mobilis SJ95               |                                         |
| 353 | 0        | 116754713 | [ref] | YP_843833.1    | Peroxidase                                              | Meihanosaela thermophila PT          | FSHPADFTPVCTTEFLSVDSHMKWTEWIL GMSINTVR  |
|     |          | 116666164 | [gb]  | ABK15191.1     | 1-Cys peroxiredoxin / 3-Cys thioredoxin peroxidase      | Meihanosaela thermophila PT          |                                         |
| 354 | 0        | 158517778 | [sp]  | POC5D0         | REHYB_ORYSI 1-Cys peroxiredoxin B (1-Cys Prx B) (Th     | Onyza sativa (indica cultivar-group) | FSHPADFTPVCTTEFLSDDSHDKWIKDIDEKDLLTAA   |
|     |          | 125559317 | [gb]  | EAZ04853.1     | hypothetical protein Osl_026085                         | Onyza sativa (indica cultivar-group) |                                         |
| 355 | 0        | 116643144 | [gb]  | ABK06391.1     | peroxiredoxin 6-related sequence 1                      | Mus macedonicus                      | FSHPKDFTPVCTTELLSDDHLAWSKDIWEKDKPLTAR   |
| 356 | 1.01E-13 | 461266317 | [ref] | XP_387712.1    | hypothetical protein F_G07536.1                         | Glibberella zeae PH-1                | FSHPEDYTPVCTTELLSANSHEGWIKDIEVTGGDEKG   |
| 357 | 0        | 50309715  | [ref] | XP_454866.1    | unnamed protein product                                 | Kluveromyces lactis                  | QTKSLRINFSPADFTPVCTTELLSHQWIKDIPPTVS    |
|     |          | 49644004  | [emb] | CAG99956.1     | unnamed protein product                                 | Kluveromyces lactis                  |                                         |
| 358 | 0        | 24581278  | [ref] | NP_523463.2    | Peroxiredoxin 6005 CG3083-PA, isoform A                 | Drosophila melanogaster              | FSHPADFTPVCTTELLSDDSHDKWIKDIEKDKLLTAR   |
|     |          | 7295884   | [gb]  | AAF51184.1     | CG3083-PA                                               | Bradyrhizobium japonicum USDA 110    | FSHPKDFTPVCTTELLSVDHRHAKWSEDINQTVRQGED  |
| 359 | 0        | 27380419  | [ref] | NP_771948.1    | anti-oxidant protein                                    | Bradyrhizobium japonicum USDA 110    | FSHPADFTPVCTTELLSDDSHDKWIKDIEKDKLLTAR   |
|     |          | 27353583  | [db]  | BAG50573.1     | anti-oxidant protein                                    | Bradyrhizobium japonicum USDA 110    |                                         |
| 360 | 0        | 148653238 | [ref] | YP_001280331.1 | 1-Cys peroxiredoxin                                     | Psychrobacter sp. PRwf-1             | FSHPADFTPVCTTELLSDDSHDKWIKDIEKDKLLTAR   |
|     |          | 148572322 | [gb]  | ABO94381.1     | 1-Cys peroxiredoxin                                     | Psychrobacter sp. PRwf-1             |                                         |
| 361 | 0        | 12044363  | [gb]  | AAG47823.1     | AF311879_1 1-cys peroxiredoxin DPx-2540-1               | Drosophila melanogaster              | FSHPADFTPVCTTELLSVDSHVDWWDIQQKDKQLTDR   |
| 362 | 0        | 145613040 | [ref] | XP_362792.2    | unnamed protein product                                 | Aspergillus oryzae                   | QERAF-SHPDDFTPICTITTELEFARLSANSHKLWIKDI |
| 363 | 3.41E-13 | 83769078  | [db]  | BAE59215.1     | conserved hypothetical protein                          | Magnaporthe grisea 70-15             | FSHPEDFTPVCTTELLSANSHDGWIKDIASTGROAKD   |
|     |          | 145020105 | [gb]  | EDK04333.1     | conserved hypothetical protein                          | Magnaporthe grisea 70-15             |                                         |
| 364 | 2.46E-18 | 160877644 | [pdb] | 2E2M           | A Chain A, Crystal Structure Of Archaeal Peroxiredoxin, | Aeropyrum Perimix K1                 | QGKWFSPADFTPVTTTEFLVSDSHIKWKEWITHTVR    |
|     |          | 160877645 | [pdb] | 2E2M           | B Chain B, Crystal Structure Of Archaeal Peroxiredoxin, | Aeropyrum Perimix K2                 |                                         |
|     |          | 160877646 | [pdb] | 2E2M           | C Chain C, Crystal Structure Of Archaeal Peroxiredoxin, | Aeropyrum Perimix K3                 |                                         |
|     |          | 160877647 | [pdb] | 2E2M           | D Chain D, Crystal Structure Of Archaeal Peroxiredoxin, | Aeropyrum Perimix K4                 |                                         |
|     |          | 160877648 | [pdb] | 2E2M           | E Chain E, Crystal Structure Of Archaeal Peroxiredoxin, | Aeropyrum Perimix K5                 |                                         |
|     |          | 160877649 | [pdb] | 2E2M           | F Chain F, Crystal Structure Of Archaeal Peroxiredoxin, | Aeropyrum Perimix K6                 |                                         |
|     |          | 160877650 | [pdb] | 2E2M           | G Chain G, Crystal Structure Of Archaeal Peroxiredoxin, | Aeropyrum Perimix K7                 |                                         |
|     |          | 160877651 | [pdb] | 2E2M           | H Chain H, Crystal Structure Of Archaeal Peroxiredoxin, | Aeropyrum Perimix K8                 |                                         |
|     |          | 160877652 | [pdb] | 2E2M           | I Chain I, Crystal Structure Of Archaeal Peroxiredoxin, | Aeropyrum Perimix K9                 |                                         |
|     |          | 160877653 | [pdb] | 2E2M           | J Chain J, Crystal Structure Of Archaeal Peroxiredoxin, | Aeropyrum Perimix K10                |                                         |
|     |          | 160877686 | [pdb] | 2NVL           | A Chain A, Crystal Structure Of Archaeal Peroxiredoxin, | Aeropyrum Perimix K11                |                                         |
|     |          | 160877687 | [pdb] | 2NVL           | B Chain B, Crystal Structure Of Archaeal Peroxiredoxin, | Aeropyrum Perimix K12                |                                         |
|     |          | 160877688 | [pdb] | 2NVL           | C Chain C, Crystal Structure Of Archaeal Peroxiredoxin, | Aeropyrum Perimix K13                |                                         |
|     |          | 160877689 | [pdb] | 2NVL           | D Chain D, Crystal Structure Of Archaeal Peroxiredoxin, | Aeropyrum Perimix K14                |                                         |
|     |          | 160877690 | [pdb] | 2NVL           | E Chain E, Crystal Structure Of Archaeal Peroxiredoxin, | Aeropyrum Perimix K15                |                                         |
|     |          | 160877691 | [pdb] | 2NVL           | F Chain F, Crystal Structure Of Archaeal Peroxiredoxin, | Aeropyrum Perimix K16                |                                         |
|     |          | 160877692 | [pdb] | 2NVL           | G Chain G, Crystal Structure Of Archaeal Peroxiredoxin, | Aeropyrum Perimix K17                |                                         |
|     |          | 160877693 | [pdb] | 2NVL           | H Chain H, Crystal Structure Of Archaeal Peroxiredoxin, | Aeropyrum Perimix K18                |                                         |
|     |          | 160877694 | [pdb] | 2NVL           | I Chain I, Crystal Structure Of Archaeal Peroxiredoxin, | Aeropyrum Perimix K19                |                                         |

|     |          |               |                |                                                              |                                                 |                 |  |  |                                           |
|-----|----------|---------------|----------------|--------------------------------------------------------------|-------------------------------------------------|-----------------|--|--|-------------------------------------------|
| 365 |          | 160877695.pdb | 2NVL           | J Chain J. Crystal Structure Of Archaeal Peroxiredoxin, 1    | Aeropyrum Permix K20                            |                 |  |  | FSHPKDFTPVCTITELLSVDKHRDHWATDINGITVROGGDD |
|     | 0        | 111023898.ref | YP_706870.1    | probable peroxiredoxin                                       | Rhodococcus sp. RHA1                            |                 |  |  |                                           |
| 366 |          | 110823428.gb  | ABG98712.1     | probable peroxiredoxin                                       | Rhodococcus sp. RHA1                            |                 |  |  |                                           |
|     | 0        | 13472213.ref  | NP_103780.1    | probable antioxidant protein                                 | Mesorhizobium loti MAFF303099                   | BCP (6.741E-09) |  |  | FSHPKDFTPVCTITELPEFVLSVDRHAGWADDIPATAG    |
| 367 |          | 14022958.gb   | BAB49566.1     | probable antioxidant protein                                 | Mesorhizobium loti MAFF303099                   |                 |  |  |                                           |
| 368 |          | 68161053.gb   | AAV186958.1    | peroxiredoxin 6                                              | Ictiurus punctatus                              |                 |  |  |                                           |
|     | 0        | 87301405.ref  | XP_01084246.1  | rehydrin                                                     | Synechococcus sp. WH 5701                       |                 |  |  | QLGDFSHPADYTPVCTITELLSVDSHKGWIGDMLTVR     |
|     | 0        | 87284373.gb   | EAQ76326.1     | rehydrin                                                     | Synechococcus sp. WH 5701                       |                 |  |  |                                           |
| 369 |          | 16768422.gb   | AAI28430.1     | GM04289p                                                     | Drosophila melanogaster                         |                 |  |  | FSHPADFPTVCTITELSCDSHKGWIEDIFGKLPKLTCTR   |
| 370 |          | 149378458.ref | XP_01896148.1  | antioxidant protein LsfA                                     | Marinobacter algicola DG893                     |                 |  |  | FSHPADFPTVCTITELKDLSDVSHKWEIKDILTIVR      |
|     | 0        | 149357260.gb  | EDM45792.1     | antioxidant protein LsfA                                     | Marinobacter algicola DG893                     |                 |  |  |                                           |
| 371 |          | 146303851.ref | YP_001191167.1 | putative peroxiredoxin                                       | Metaliosphaera sedulia DSM 5348                 |                 |  |  | FSHPGDFTPVCTITELSVDSHIEWWILGMLTATVR       |
|     | 0        | 145702101.gb  | ABP95243.1     | 1-Cys peroxiredoxin                                          | Metaliosphaera sedulia DSM 5348                 |                 |  |  |                                           |
| 372 |          | 28916703.ref  | NP_796230.1    | peroxiredoxin 5 related sequence 1 protein                   | Mus musculus                                    |                 |  |  | FSHPKDFTPVCTITELSVDDHLAWSKDVKEKDPKLTAR    |
|     | 0        | 26325554.gb   | BAC26531.1     | unnamed protein product                                      | Mus musculus                                    |                 |  |  |                                           |
|     | 0        | 26345828.gb   | BAC36564.1     | unnamed protein product                                      | Mus musculus                                    |                 |  |  |                                           |
|     | 0        | 56789921.gb   | AAH87895.1     | Peroxiredoxin 6, related sequence 1                          | Mus musculus                                    |                 |  |  |                                           |
|     | 0        | 74149439.gb   | BAE36371.1     | unnamed protein product                                      | Mus musculus                                    |                 |  |  |                                           |
|     | 0        | 148695512.gb  | EDI27259.1     | mCG48959                                                     | Treponema denticola                             |                 |  |  | LGDDFHPADFPTVCTTEFLSIDSLSHLKWIEWINTVTR    |
| 373 | 9.87E-20 | 62287728.sp   | Q73R84         | TDXH_TREDE Probable peroxiredoxin                            | Bradyrhizobium sp. ORS278                       |                 |  |  | FSHPADFPTICTTELLSCNSHKEWLEDIPLPARQKGE     |
| 374 |          | 47028297.gb   | AAI09081.1     | peroxidase                                                   | Bradyrhizobium sp. ORS278                       |                 |  |  | FSHPGDFTPVCTITELSCDSHKEWIKVDKDPHGVR       |
| 375 |          | 6466098.gb    | AAF12782.1     | AF191099_1 1-Cys peroxiredoxin                               | Fagopyrum esculentum                            |                 |  |  | FSHPKDFTPVCTITELSVDKHQAQWSEDINLTVROGED    |
| 376 |          | 146340217.ref | YP_001205265.1 | Thioredoxin peroxidase (AhpC, Alkyl hydroperoxide reductase) | Bradyrhizobium sp. ORS278                       |                 |  |  |                                           |
|     | 0        | 146193023.emb | CAL77032.1     | Thioredoxin peroxidase (AhpC, Alkyl hydroperoxide reductase) | Bradyrhizobium sp. ORS278                       |                 |  |  |                                           |
| 377 |          | 119485821.ref | XP_001262263.1 | AhpC/TSA family thioredoxin peroxidase, putative             | Neosartorya fischeri NRRL 181                   |                 |  |  | QEOPFHPADFPTVCTITELLSADSHGDWWDKDFPTIR     |
|     | 0        | 119410409.gb  | EAW20356.1     | AhpC/TSA family thioredoxin peroxidase, putative             | Neosartorya fischeri NRRL 181                   |                 |  |  |                                           |
| 378 |          | 15678187.ref  | NP_275302.1    | alkyl hydroperoxide reductase                                | Meiwothermobacter themauto BCP (2.797E-09)      |                 |  |  | FSHPADFPTVCTITEFFRELDLSVDSHIKWIEWINTVTR   |
|     | 0        | 2621201.gb    | AAH84665.1     | alkyl hydroperoxide reductase                                | Meiwothermobacter themauto BCP (2.797E-09)      |                 |  |  |                                           |
| 379 | 9.87E-20 | 45360855.ref  | NP_989102.1    | hypothetical protein LOC394706                               | Xenopus tropicalis                              |                 |  |  | FSHPRDYTPVCTITELSDHDLGWSKDIKDPVTVAR       |
|     | 0        | 38566186.gb   | AAH62510.1     | Hypothetical protein MGC76137                                | Xenopus tropicalis                              |                 |  |  |                                           |
|     | 0        | 89272936.emb  | CAJ82892.1     | peroxiredoxin 6                                              | Xenopus tropicalis                              |                 |  |  |                                           |
| 380 |          | 118589653.ref | XP_01547058.1  | antioxidant protein LsfA                                     | Stappia aggregata IAM 12614                     | BCP (9.270E-09) |  |  | FSHPKDFTPVCTITELKLDKVSVDHHRWVGDTILTIVR    |
|     | 0        | 118437739.gb  | EAV44375.1     | antioxidant protein LsfA                                     | Stappia aggregata IAM 12614                     |                 |  |  |                                           |
| 381 |          | 154501119.ref | XP_02039157.1  | hypothetical protein BACCAP_04808                            | Bacteroides capillosus ATCC 29799               |                 |  |  | QENRFHPADFPTVCTTEFLSVDSHAWLRKITQAVR       |
|     | 0        | 150269863.gb  | EDM97397.1     | hypothetical protein BACCAP_04808                            | Bacteroides capillosus ATCC 29799               |                 |  |  |                                           |
| 382 | 5.04E-13 | 119476574.ref | XP_001259200.1 | antioxidant, AhpC/TSA family, putative                       | Neosartorya fischeri NRRL 181                   |                 |  |  | IGNDFHPEDYTPVCTITELLSANSHDGVNDINVDAR      |
|     | 0        | 119407354.gb  | EAW17303.1     | antioxidant, AhpC/TSA family, putative                       | Neosartorya fischeri NRRL 181                   |                 |  |  |                                           |
| 383 |          | 88902538.ref  | XP_01118065.1  | Peroxidase                                                   | Polaribacter irgensii 23-P                      |                 |  |  | FSHPADYTPVCTITELAEFDLSVDSHKEWIKDIQILTIVR  |
|     | 0        | 88781396.gb   | EAR12574.1     | Peroxidase                                                   | Polaribacter irgensii 23-P                      |                 |  |  |                                           |
| 384 | 3.73E-13 | 111071162.gb  | EAT192282.1    | hypothetical protein SNOG_00787                              | Phaeosphaeria nodorum SN15                      |                 |  |  | QGFIFHPEDYTPVCTITELLSANSHGKWKIDIASTGR     |
| 385 |          | 91772959.ref  | YP_565651.1    | peroxiredoxin                                                | Meiwanococcoides burtonii DSM 6242              |                 |  |  | FSHPADFPTVCTITELSIDAHIAWLRTIPVIADLRKD     |
|     | 0        | 91711974.gb   | ABE51901.1     | 3-Cys thioredoxin peroxidase                                 | Meiwanococcoides burtonii DSM 6242              |                 |  |  |                                           |
| 386 |          | 41387146.ref  | NP_957099.1    | peroxiredoxin 6                                              | Danio rerio                                     |                 |  |  | FSHPRDYTPVCTITELSIDHHRKRWSEDILGMLPLTVAR   |
|     | 0        | 37748290.gb   | AAH59671.1     | Peroxiredoxin 6                                              | Danio rerio                                     |                 |  |  |                                           |
|     | 0        | 55251222.emb  | CAH68943.1     | novel protein (zgc:73360)                                    | Danio rerio                                     |                 |  |  |                                           |
|     | 0        | 157423087.gb  | AAI53617.1     | Prx6 protein                                                 | Danio rerio                                     |                 |  |  |                                           |
| 387 |          | 109019544.ref | XP_001101473.1 | PREDICTED: peroxiredoxin 6                                   | Macaca mulatta                                  |                 |  |  | FSHPRDFTPVCTITELSIDHLLAWSKIDAEKDPVTVAR    |
| 388 |          | 161485727.ref | NP_662627.2    | peroxiredoxin                                                | Chlorobium tepidum TLS                          |                 |  |  | FSHPADFPTVCTITELSHHWVWLDVLDLGMILTIVR      |
| 389 |          | 166843142.gb  | ABK06390.1     | peroxiredoxin 6-related sequence 1                           | Mus caroli                                      |                 |  |  | FSHPKDFTPVCTITELSIDHLLAWSKIDAEKDPVTVAR    |
| 390 | 4.54E-15 | 156448993.ref | XP_02055377.1  | Peroxiredoxin                                                | Methylobacterium chloromethanum BCP (8.736E-09) |                 |  |  | FSHPADFPTVCTITELSLAWAHNIGMLSATVTR         |
|     | 0        | 156192509.gb  | EDQ24694.1     | Peroxiredoxin                                                | Methylobacterium chloromethanum CM4             |                 |  |  |                                           |
| 391 |          | 67917886.ref  | XP_00511489.1  | Alkyl hydroperoxide reductase/Thiol specific antioxidant     | Chlorobium limicola DSM 245                     |                 |  |  | FSHPADYTPVCTITEFMSVDSHKKWVWVWLDLGMILTIVR  |
|     | 0        | 67784419.gb   | EAM443791.1    | Alkyl hydroperoxide reductase/Thiol specific antioxidant     | Chlorobium limicola DSM 245                     |                 |  |  |                                           |
| 392 |          | 66087157.ref  | XP_677992.1    | 1-cys peroxidoxin                                            | Plasmodium berghei strain ANKA                  |                 |  |  | FSHPNDFTPVCTITELFCNSHQWIEDIEKDPKLTCTR     |
|     | 0        | 56498312.emb  | CAH197886.1    | 1-cys peroxidoxin, putative                                  | Plasmodium berghei                              |                 |  |  |                                           |
| 393 |          | 159045062.ref | YP_001533856.1 | Peroxiredoxin                                                | Dinoroseobacter shibae DFL 12                   |                 |  |  | QDMNFSHPADFPTVCTITELSIDAHIAWIMRSITQAVR    |
|     | 0        | 157912822.gb  | ABV94255.1     | Peroxiredoxin                                                | Dinoroseobacter shibae DFL 12                   |                 |  |  |                                           |
| 394 |          | 921112314.ref | YP_572242.1    | Peroxidase                                                   | Chromohalobacter salexigens DSM 3043            |                 |  |  | FSHPKDFTPVCTITELSVDDHKAWEVDILTIVROGGWD    |
|     | 0        | 91795404.gb   | ABE57543.1     | 1-Cys peroxiredoxin                                          | Chromohalobacter salexigens DSM 3043            |                 |  |  |                                           |
| 395 |          | 62287772.sp   | QBKBN8         | TDXH_CHLITE Probable peroxiredoxin                           | Chlorobium tepidum TLS                          |                 |  |  | FSHPADFPTVCTITEFSSHKKWVWVWLDVLDLGMILTIVR  |
|     | 0        | 21647758.gb   | AAM72969.1     | peroxiredoxin, putative                                      | Chlorobium tepidum TLS                          |                 |  |  |                                           |
| 396 |          | 118793114.ref | XP_320690.3    | thioredoxin-dependent peroxidase (AGAP011824-PA)             | Anopheles gambiae str. PEST                     |                 |  |  | FSHPADFPTVCTITELHSVDCHVDWVNDIDEKDAQTVR    |
|     | 0        | 116117223.gb  | EAA00332.3     | thioredoxin-dependent peroxidase (AGAP011824-PA)             | Anopheles gambiae str. PEST                     |                 |  |  |                                           |
| 398 |          | 109631584.gb  | ABG35966.1     | glutathione peroxidase                                       | Helianthus annuus                               |                 |  |  | FSHPGDFTPVCTITELSCDSHKEWIKDIKDAKSTGR      |

|     |          |               |                |                                                                              |  |  |  |                                                                     |                                           |
|-----|----------|---------------|----------------|------------------------------------------------------------------------------|--|--|--|---------------------------------------------------------------------|-------------------------------------------|
|     |          | 109631586.gb  | ABG35967.1     | glutathione peroxidase                                                       |  |  |  | Helianthus annuus                                                   | FSHPADFTPVCITTEFLSVDSHKGWITDIQGAETATVR    |
|     |          | 109631588.gb  | ABG35968.1     | glutathione peroxidase                                                       |  |  |  | Helianthus annuus                                                   | FSHPADFTPVCITTEFLSVDSHKGWITDIQGAETATVR    |
|     |          | 109631604.gb  | ABG35976.1     | glutathione peroxidase                                                       |  |  |  | Helianthus annuus                                                   | FSHPADFTPVCITTEFLSVDSHKGWITDIQGAETATVR    |
|     |          | 109631606.gb  | ABG35977.1     | glutathione peroxidase                                                       |  |  |  | Helianthus annuus                                                   | FSHPADFTPVCITTEFLSVDSHKGWITDIQGAETATVR    |
|     |          | 109631608.gb  | ABG35978.1     | glutathione peroxidase                                                       |  |  |  | Helianthus annuus                                                   | FSHPADFTPVCITTEFLSVDSHKGWITDIQGAETATVR    |
|     |          | 109631610.gb  | ABG35979.1     | glutathione peroxidase                                                       |  |  |  | Helianthus annuus                                                   | FSHPADFTPVCITTEFLSVDSHKGWITDIQGAETATVR    |
|     |          | 109631612.gb  | ABG35980.1     | glutathione peroxidase                                                       |  |  |  | Helianthus annuus                                                   | FSHPADFTPVCITTEFLSVDSHKGWITDIQGAETATVR    |
|     |          | 109631614.gb  | ABG35981.1     | glutathione peroxidase                                                       |  |  |  | Helianthus annuus                                                   | FSHPADFTPVCITTEFLSVDSHKGWITDIQGAETATVR    |
| 399 | 0        | 91775904.ref  | YP_545660.1    | Peroxidase                                                                   |  |  |  | Methylobacillus flagellatus KT                                      | FSHPADFTPVCITTEFLSVDSHKGWITDIQGAETATVR    |
|     |          | 91709891.ref  | ABE49819.1     | 1-Cys peroxidoredoxin                                                        |  |  |  | Methylobacillus flagellatus KT                                      | FSHPADFTPVCITTEFLSVDSHKGWITDIQGAETATVR    |
| 400 | 0        | 14286173.sp   | O26262         | TDXH_METTH Probable peroxidoredoxin                                          |  |  |  | Methanobacterium thermoautotrophicum BCP (1.928E-09) BCP eng (0.37) | FSHPADFTPVCITTEFLSVDSHKGWITDIQGAETATVR    |
| 401 | 0        | 78061033.ref  | YP_370941.1    | Peroxidase                                                                   |  |  |  | Burkholderia sp. 383                                                | LGEDFSHPKDFTPVCTTEFLSVDHKKWADIELTVA       |
|     |          | 77968918.gb   | ABB10297.1     | Peroxidase                                                                   |  |  |  | Burkholderia sp. 383                                                | LGEDFSHPKDFTPVCTTEFLSVDHKKWADIELTVA       |
| 402 | 6.03E-15 | 120402431.ref | YP_952260.1    | peroxidoredoxin                                                              |  |  |  | Mycobacterium vanbaalenii PYR-1                                     | NEMPFSPADFTPVCITTEFLSVDHKKWADIELTVA       |
|     |          | 119955249.gb  | ABM12254.1     | 3-Cys thioredoxin peroxidase                                                 |  |  |  | Mycobacterium vanbaalenii PYR-1                                     | NEMPFSPADFTPVCITTEFLSVDHKKWADIELTVA       |
| 403 | 1.12E-09 | 11079190.gb   | BAB17604.1     | peroxidoredoxin                                                              |  |  |  | Haemaphysalis longicornis                                           | FSHPADFTPVCITTEFLSVDHKKWADIELTVA          |
| 404 | 0        | 88799325.ref  | ZP_01114903.1  | thiol-specific antioxidant protein                                           |  |  |  | Reinekea sp. MED297                                                 | FSHPADFTPVCITTEFLSVDHKKWADIELTVA          |
|     |          | 88777864.gb   | EAR09061.1     | thiol-specific antioxidant protein                                           |  |  |  | Reinekea sp. MED297                                                 | FSHPADFTPVCITTEFLSVDHKKWADIELTVA          |
| 405 | 1.23E-13 | 12065322.ref  | YP_957673.1    | Peroxidase                                                                   |  |  |  | Marinobacter aquaeolei VT8                                          | FSHPADFTPVCITTEFLSVDHKKWADIELTVA          |
|     |          | 120323171.gb  | ABM17486.1     | 1-Cys peroxidoredoxin                                                        |  |  |  | Marinobacter aquaeolei VT8                                          | FSHPADFTPVCITTEFLSVDHKKWADIELTVA          |
| 406 | 0        | 60300018.gb   | AAK18637.1     | peroxidoredoxin                                                              |  |  |  | Glycolalpa orientalis                                               | FSHPADFTPVCITTEFLSVDHKKWADIELTVA          |
| 407 | 0        | 89891742.ref  | ZP_01203245.1  | peroxidoredoxin, AhpC/Tsa family                                             |  |  |  | Flavobacteria bacterium BBFL7                                       | SDFAKDKWIFSHPADFTPVCITTEFLSVDHKKWADIELTVA |
|     |          | 89516077.gb   | EAS18741.1     | peroxidoredoxin, AhpC/Tsa family                                             |  |  |  | Flavobacteria bacterium BBFL7                                       | SDFAKDKWIFSHPADFTPVCITTEFLSVDHKKWADIELTVA |
| 408 | 2.91E-14 | 160378621.ref | YP_001557589.1 | Peroxidoredoxin                                                              |  |  |  | Clostridium phytofermentans ISDg                                    | FSHPGDFTPVCTSEFLSVDHKKWADIELTVA           |
|     |          | 160427287.gb  | ABX40850.1     | Peroxidoredoxin                                                              |  |  |  | Clostridium phytofermentans ISDg                                    | FSHPGDFTPVCTSEFLSVDHKKWADIELTVA           |
| 409 | 0        | 92117693.ref  | YP_577422.1    | Peroxidase                                                                   |  |  |  | Nitrobacter hamburgensis X14                                        | LSIGFSPKDFTPVCTTEFLSVDHKKWADIELTVA        |
|     |          | 91800587.gb   | ABE62962.1     | Peroxidase                                                                   |  |  |  | Nitrobacter hamburgensis X14                                        | LSIGFSPKDFTPVCTTEFLSVDHKKWADIELTVA        |
| 410 | 0        | 28872429.ref  | NP_795048.1    | antioxidant, AhpC/Tsa family                                                 |  |  |  | Pseudomonas syringae pv. tomato s/r. DC3000                         | FSHPADFTPVCITTEFLSVDHKKWADIELTVA          |
|     |          | 28856584.gb   | AAO58743.1     | antioxidant, AhpC/Tsa family                                                 |  |  |  | Pseudomonas syringae pv. tomato s/r. DC3000                         | FSHPADFTPVCITTEFLSVDHKKWADIELTVA          |
| 411 | 1.07E-15 | 164861047.ref | XP_001731646.1 | hypothetical protein MGL_0914                                                |  |  |  | Malassezia globosa CBS 7966                                         | FSHPGDFTPVCTSEFLSVDHKKWADIELTVA           |
|     |          | 159105547.ref | EDP44432.1     | hypothetical protein MGL_0914                                                |  |  |  | Malassezia globosa CBS 7966                                         | FSHPGDFTPVCTSEFLSVDHKKWADIELTVA           |
| 412 | 0        | 115473617.ref | NP_001060407.1 | Os07g0638300                                                                 |  |  |  | Onyza sativa (japonica cultivar-group)                              | GLTIGFSPKDFTPVCTTEFLSVDHKKWADIELTVA       |
|     |          | 188517777.sp  | POC5C9         | REHYA_ORYSU_1-Cys peroxidoredoxin A (1-Cys Prx A) (TH putative RAB24 protein |  |  |  | Onyza sativa (japonica cultivar-group)                              | GLTIGFSPKDFTPVCTTEFLSVDHKKWADIELTVA       |
|     |          | 27261084.gb   | BAC45197.1     | putative RAB24 protein                                                       |  |  |  | Onyza sativa (japonica cultivar-group)                              | GLTIGFSPKDFTPVCTTEFLSVDHKKWADIELTVA       |
|     |          | 33241060.gb   | AAQ01200.1     | peroxidoredoxin                                                              |  |  |  | Onyza sativa (japonica cultivar-group)                              | GLTIGFSPKDFTPVCTTEFLSVDHKKWADIELTVA       |
|     |          | 113611943.gb  | BAF22321.1     | Os07g0638300                                                                 |  |  |  | Onyza sativa (japonica cultivar-group)                              | GLTIGFSPKDFTPVCTTEFLSVDHKKWADIELTVA       |
| 413 | 0        | 50555488.ref  | XP_505152.1    | hypothetical protein                                                         |  |  |  | Onyza sativa (japonica cultivar-group)                              | GLTIGFSPKDFTPVCTTEFLSVDHKKWADIELTVA       |
|     |          | 49651022.emb  | CAG77959.1     | unnamed protein product                                                      |  |  |  | Yarrowia lipolytica                                                 | PAGARFSPADFTPVCITTEFLSVDHKKWADIELTVA      |
| 414 | 0        | 22299804.ref  | NP_663051.1    | AhpC/TSA family protein                                                      |  |  |  | Thermosynechococcus elongatus BP-1                                  | FSHPADFTPVCITTEFLSVDHKKWADIELTVA          |
|     |          | 22295988.gb   | BAC09813.1     | AhpC/TSA family protein                                                      |  |  |  | Thermosynechococcus elongatus BP-1                                  | FSHPADFTPVCITTEFLSVDHKKWADIELTVA          |
| 415 | 0        | 13541930.ref  | NP_111618.1    | putative peroxidoredoxin                                                     |  |  |  | Thermoplasma volcanium GSS1                                         | FSHPGDFTPVCTTEFLSVDHKKWADIELTVA           |
|     |          | 23822556.sp   | Q879N7         | TDXH_THEVO Probable peroxidoredoxin                                          |  |  |  | Thermoplasma volcanium GSS1                                         | FSHPGDFTPVCTTEFLSVDHKKWADIELTVA           |
|     |          | 14325361.gb   | BAB60265.1     | hydroperoxide reductase                                                      |  |  |  | Thermoplasma volcanium GSS1                                         | FSHPGDFTPVCTTEFLSVDHKKWADIELTVA           |
| 416 | 1.95E-17 | 157313403.gb  | ABV32570.1     | 1-Cys peroxidoredoxin                                                        |  |  |  | Bombyx mori                                                         | LKGTFSHPSPDFTPVCTTEFLSVDHKKWADIELTVA      |
| 417 | 2.68E-20 | 124512718.ref | XP_001349492.1 | 1-cys peroxidoredoxin                                                        |  |  |  | Plasmodium falciparum 3D7                                           | FSHPHDFTPVCITTEFLSVDHKKWADIELTVA          |
|     |          | 4996210.gb    | BAA78369.1     | 1-cys peroxidoredoxin                                                        |  |  |  | Plasmodium falciparum                                               | FSHPHDFTPVCITTEFLSVDHKKWADIELTVA          |
|     |          | 23499261.emb  | CAD51341.1     | 1-cys peroxidoredoxin                                                        |  |  |  | Plasmodium falciparum 3D7                                           | FSHPHDFTPVCITTEFLSVDHKKWADIELTVA          |
| 418 | 0        | 159041353.ref | YP_001540605.1 | alkyl hydroperoxide reductase/Thiol specific antioxidant/                    |  |  |  | Caldwellia marilingensis IC-167                                     | FSHPGDFTPVCTTEFLSVDHKKWADIELTVA           |
|     |          | 157920188.gb  | ABW01615.1     | alkyl hydroperoxide reductase/Thiol specific antioxidant/                    |  |  |  | Caldwellia marilingensis IC-167                                     | FSHPGDFTPVCTTEFLSVDHKKWADIELTVA           |
| 419 | 0        | 91217129.ref  | ZP_01254099.1  | antioxidant, AhpC                                                            |  |  |  | Psychroflexus torquis ATCC 700755                                   | SEFAPEKWFISHPADFTPVCITTEFLSVDHKKWADIELTVA |
|     |          | 91184729.gb   | EAS71110.1     | antioxidant, AhpC                                                            |  |  |  | Psychroflexus torquis ATCC 700755                                   | SEFAPEKWFISHPADFTPVCITTEFLSVDHKKWADIELTVA |
| 420 | 0        | 91976909.ref  | YP_569568.1    | Peroxidase                                                                   |  |  |  | Rhodospseudomonas palustris BisB5                                   | FSHPADFTPVCITTEFLSVDHKKWADIELTVA          |
|     |          | 91683369.gb   | ABE39687.1     | 1-Cys peroxidoredoxin                                                        |  |  |  | Rhodospseudomonas palustris BisB5                                   | FSHPADFTPVCITTEFLSVDHKKWADIELTVA          |
| 421 | 0        | 3334373.sp    | Q55060         | TDXH1_SULME Probable peroxidoredoxin 1                                       |  |  |  | Sulfolobus metallicus                                               | FEKGFHPADFTPVCITTEFLSVDHKKWADIELTVA       |
|     |          | 1045502.gb    | AA02185.1      | alkyl hydroperoxide reductase/thiol-specific antioxidant h                   |  |  |  | Sulfolobus metallicus                                               | FEKGFHPADFTPVCITTEFLSVDHKKWADIELTVA       |
| 422 | 2.00E-11 | 85373707.ref  | YP_457769.1    | Peroxidase                                                                   |  |  |  | Erythrobacter litoralis HTCC2594                                    | QGTIFSHPKAFTPVCTTEFLSVDHKKWADIELTVA       |
|     |          | 84786790.gb   | ABC62972.1     | Peroxidase                                                                   |  |  |  | Erythrobacter litoralis HTCC2594                                    | QGTIFSHPKAFTPVCTTEFLSVDHKKWADIELTVA       |
| 423 | 1.18E-15 | 15011539.gb   | AAK77610.1     | AF397213_1 peroxidoxin 2                                                     |  |  |  | Toxoplasma gondii                                                   | MSHPHDFTPVCITTEFLSVDHKKWADIELTVA          |
| 424 | 0        | 11497886.ref  | NP_069108.1    | alkyl hydroperoxide reductase                                                |  |  |  | Archaeoglobus fulgidus DSM 4304                                     | FSHPADFTPVCITTEFLSVDHKKWADIELTVA          |
|     |          | 2850373.gb    | AAB90968.1     | alkyl hydroperoxide reductase                                                |  |  |  | Archaeoglobus fulgidus DSM 4304                                     | FSHPADFTPVCITTEFLSVDHKKWADIELTVA          |
| 425 | 3.38E-15 | 15888804.ref  | NP_354488.1    | hypothetical protein Atu1480                                                 |  |  |  | Agrobacterium tumefaciens s/r. C58                                  | FSHPKFNFTPVCITTEFLSVDHKKWADIELTVA         |
|     |          | 15156560.gb   | AAK87270.1     | conserved hypothetical protein                                               |  |  |  | Agrobacterium tumefaciens s/r. C58                                  | FSHPKFNFTPVCITTEFLSVDHKKWADIELTVA         |
| 426 | 0        | 188594629.gb  | EDP33213.1     | thioredoxin peroxidase, identical                                            |  |  |  | Brugia malayi                                                       | IGKDFSHPRDFTPVCTTEFLSVDHKKWADIELTVA       |
| 427 | 0        | 67922357.ref  | ZP_00515869.1  | Peroxidase                                                                   |  |  |  | Crocospaera watsonii WH 8501                                        | QLGDFSHPADYTPVCTTEFLSVDHKKWADIELTVA       |

|     |          |                |                |                                                                |                                         |                                            |
|-----|----------|----------------|----------------|----------------------------------------------------------------|-----------------------------------------|--------------------------------------------|
| 428 | 2.09E-14 | 67855808.gb    | EAM510655.1    | Peroxidase                                                     | Crocospaera watsonii WH 8501            | QERAFSHPPDDFTPICTTELEFARLSANSHHAWIKDI      |
|     |          | 145257366.ref  | XP_001401704.1 | hypothetical protein An04g03360                                | Aspergillus niger                       |                                            |
|     |          | 134058618.famb | CAK38602.1     | unnamed protein product                                        | Aspergillus niger                       | FSHPADFTPVCTTEFLSIDSHIAWMLNIEGKLPATAA      |
| 429 | 0        | 86751659.ref   | YP_488195.1    | Alkyl hydroperoxide reductase/Thiol specific antioxidant       | Rhodospseudomonas palustris HaA2        |                                            |
|     |          | 86574727.gb    | ABD09284.1     | 1-Cys peroxiredoxin                                            | Rhodospseudomonas palustris HaA2        | FSHPGDFTPVCTTEFRYKDLSDSHIAWIRDIGATVR       |
| 430 | 0        | 14285790.sp    | Q8HJL3         | TDXH2_THEAC Probable peroxiredoxin 2                           | Thermoplasma acidophilum                | FSHPGDFTPVCTTEFLSIDSHIAWMLNIEGKLPATAA      |
|     |          | 10640269.famb  | CAC12083.1     | peroxiredoxin related protein                                  | Thermoplasma acidophilum                |                                            |
| 431 | 1.78E-13 | 47227982.famb  | CAF97611.1     | unnamed protein product                                        | Tetraodon nigroviridis                  | FSHPKDFTPVCTTEFLSIDSHIAWMLNIEGKLPATAA      |
| 432 | 7.60E-14 | 16264837.ref   | NP_437629.1    | putative anti-oxidant protein, AhpC/TSA family                 | Sinorhizobium meliloti 1021             |                                            |
|     |          | 5690191.gb     | AAD46984.1     | unknown                                                        | Sinorhizobium meliloti                  |                                            |
|     |          | 15140976.famb  | CAC49489.1     | putative anti-oxidant protein, AhpC/TSA family                 | Sinorhizobium meliloti 1021             | THGERFSDPADFTPVCTTEFLSIDSHIAWMLNIEGKLPATAA |
| 433 | 0        | 148556644.ref  | YP_001264226.1 | Peroxiredoxin                                                  | Spingomonas wittichii RW1               |                                            |
|     |          | 148501834.gb   | ABQ70088.1     | 1-Cys peroxiredoxin                                            | Spingomonas wittichii RW1               | FSHPKDFTPVCTTEFLSIDSHIAWMLNIEGKLPATAA      |
| 434 | 0        | 126736203.ref  | ZP_01751946.1  | antioxidant, AhpC/Tsa family, putative                         | Roseobacter sp. CCS2                    |                                            |
|     |          | 126714369.gb   | EBAA11237.1    | antioxidant, AhpC/Tsa family, putative                         | Roseobacter sp. CCS2                    | FSHPADFTPVCTTEFLSIDSHIAWMLNIEGKLPATAA      |
| 435 | 0        | 75907581.ref   | YP_321877.1    | Alkyl hydroperoxide reductase/Thiol specific antioxidant       | Anabaena variabilis ATCC 29413          |                                            |
|     |          | 75701306.gb    | ABA20982.1     | 1-Cys peroxiredoxin                                            | Anabaena variabilis ATCC 29413          | FSHPADFTPVCTTEFLSIDSHIAWMLNIEGKLPATAA      |
| 436 | 0        | 119509525.ref  | ZP_01628673.1  | Alkyl hydroperoxide reductase/Thiol specific antioxidant       | Nodularia spumigena COY94.14            |                                            |
|     |          | 119465931.gb   | EAW46820.1     | Alkyl hydroperoxide reductase/Thiol specific antioxidant       | Nodularia spumigena COY94.14            | FSHPADFTPVCTTEFLSIDSHIAWMLNIEGKLPATAA      |
| 437 | 1.49E-13 | 154275508.ref  | XP_001538605.1 | thiol-specific antioxidant                                     | Alelomyces capsulatus NAM1              |                                            |
|     |          | 150415045.gb   | EDN10407.1     | thiol-specific antioxidant                                     | Alelomyces capsulatus NAM1              | FSHPADFTPVCTTEFLSIDSHIAWMLNIEGKLPATAA      |
| 438 | 0        | 126845307.ref  | ZP_01717851.1  | Peroxidase                                                     | Algoriphagus sp. PR1                    |                                            |
|     |          | 126578189.gb   | EAZ82882.1     | Peroxidase                                                     | Algoriphagus sp. PR1                    | FSHPADFTPVCTTEFLSIDSHIAWMLNIEGKLPATAA      |
| 439 | 0        | 504791761.ref  | XP_458412.1    | hypothetical protein DEHA0C17908g                              | Debaryomyces hansenii CBS767            |                                            |
|     |          | 49654078.famb  | CAG86494.1     | unnamed protein product                                        | Debaryomyces hansenii CBS767            | FSHPADFTPVCTTEFLSIDSHIAWMLNIEGKLPATAA      |
| 440 | 0        | 86607449.ref   | YP_476212.1    | antioxidant, AhpC/Tsa family                                   | Synechrococcus sp. JA-3-3Ab             |                                            |
|     |          | 86555991.gb    | ABD00949.1     | antioxidant, AhpC/Tsa family                                   | Synechrococcus sp. JA-3-3Ab             | FSHPADFTPVCTTEFLSIDSHIAWMLNIEGKLPATAA      |
| 441 | 0        | 84515052.ref   | ZP_01002415.1  | thiol-specific antioxidant protein                             | Loktanelia vestfoldensis SKA63          |                                            |
|     |          | 84511211.gb    | EAG07665.1     | thiol-specific antioxidant protein                             | Loktanelia vestfoldensis SKA63          | FSHPADFTPVCTTEFLSIDSHIAWMLNIEGKLPATAA      |
| 442 | 0        | 149280238.ref  | ZP_01886361.1  | peroxiredoxin                                                  | Pedobacter sp. BAL39                    |                                            |
|     |          | 149229075.gb   | EDM34471.1     | peroxiredoxin                                                  | Pedobacter sp. BAL39                    | FSHPADFTPVCTTEFLSIDSHIAWMLNIEGKLPATAA      |
| 443 | 0        | 109631664.gb   | ABG36006.1     | glutathione peroxidase                                         | Helianthus annuus                       |                                            |
|     |          | 109631666.gb   | ABG36007.1     | glutathione peroxidase                                         | Helianthus annuus                       | FSHPADFTPVCTTEFLSIDSHIAWMLNIEGKLPATAA      |
| 444 | 0        | 75675086.ref   | YP_317507.1    | alkyl hydroperoxide reductase/Thiol specific antioxidant       | Nitrobacter winogradskyi Nb-255         |                                            |
|     |          | 744199568.gb   | ABA04155.1     | 1-Cys peroxiredoxin                                            | Nitrobacter winogradskyi Nb-255         | FSHPADFTPVCTTEFLSIDSHIAWMLNIEGKLPATAA      |
| 445 | 0        | 86129578.ref   | NP_001034418.1 | peroxiredoxin 6                                                | Gallus gallus                           |                                            |
|     |          | 82233783.sp    | Q5ZJF4         | PRDX6_CHICK Peroxiredoxin-6                                    | Gallus gallus                           | FSHPADFTPVCTTEFLSIDSHIAWMLNIEGKLPATAA      |
|     |          | 53133620.famb  | CAG32139.1     | hypothetical protein                                           | Gallus gallus                           | FSHPADFTPVCTTEFLSIDSHIAWMLNIEGKLPATAA      |
| 446 | 0        | 14601964.ref   | NP_148509.1    | thioredoxin peroxidase                                         | Aeropyrum pernix K1                     |                                            |
|     |          | 14285795.sp    | Q8Y9L0         | TDXH_AERPE Probable peroxiredoxin                              | Aeropyrum pernix K1                     | QKWFSDPADFTPVCTTEFLSIDSHIAWMLNIEGKLPATAA   |
|     |          | 5105979.famb   | BAAB1290.1     | thioredoxin peroxidase                                         | Aeropyrum pernix K1                     |                                            |
| 447 | 0        | 88713849.ref   | ZP_01107930.1  | Peroxidase                                                     | Flavobacteriales bacterium HTCC2170     |                                            |
|     |          | 88707978.gb    | EAR00215.1     | Peroxidase                                                     | Flavobacteriales bacterium HTCC2170     | FSHPADFTPVCTTEFLSIDSHIAWMLNIEGKLPATAA      |
| 448 | 0        | 160705347.gb   | EAT189516.2    | hypothetical protein SNOG_02785                                | Phaeosphaeria nodorum SN15              |                                            |
| 450 | 0        | 91214869.ref   | ZP_01251842.1  | Peroxidase                                                     | Psychroflexus torquis ATCC 700755       |                                            |
|     |          | 91187296.gb    | EAS73666.1     | Peroxidase                                                     | Psychroflexus torquis ATCC 700755       | YSHPADFTPVCTTEFLSIDSHIAWMLNIEGKLPATAA      |
| 451 | 0        | 118037156.ref  | ZP_01508562.1  | alkyl hydroperoxide reductase/Thiol specific antioxidant       | Burkholderia phytofirmans PsJN          |                                            |
|     |          | 117991963.gb   | EAV06257.1     | alkyl hydroperoxide reductase/Thiol specific antioxidant       | Burkholderia phytofirmans PsJN          | LGEDFSHPKDFTPVCTTEFLSIDSHIAWMLNIEGKLPATAA  |
| 452 | 0        | 37521724.ref   | NP_925101.1    | AhpC/TSA family protein                                        | Gloeobacter violaceus PCC 7421          |                                            |
|     |          | 35212722.famb  | BAC90096.1     | AhpC/TSA family protein                                        | Gloeobacter violaceus PCC 7421          | FSHPKDFTPVCTTEFLSIDSHIAWMLNIEGKLPATAA      |
| 453 | 0        | 116696175.ref  | YP_841751.1    | Peroxiredoxin                                                  | Ralstonia eutropha H16                  |                                            |
|     |          | 113530674.famb | CAJ97021.1     | Peroxiredoxin                                                  | Ralstonia eutropha H16                  | QAPDFSDPADFTPVCTTEFLSIDSHIAWMLNIEGKLPATAA  |
| 454 | 2.54E-14 | 36958861.gb    | AAQ87029.1     | Alkyl hydroperoxide reductase C22 protein                      | Rhizobium sp. NGR234                    |                                            |
| 455 | 0        | 156689317.ref  | NP_247721.1    | peroxiredoxin                                                  | Methanocaldococcus jamareschii DSM 2661 |                                            |
|     |          | 1591451.gb     | AAE98731.1     | alkyl hydroperoxide reductase                                  | Methanocaldococcus jamareschii DSM 2661 | FSHPADFTPVCTTEFLSIDSHIAWMLNIEGKLPATAA      |
| 456 | 2.23E-15 | 70994244.ref   | XP_751969.1    | mitochondrial peroxiredoxin Prx1, putative                     | Aspergillus fumigatus Af293             |                                            |
|     |          | 66849603.gb    | EAL89931.1     | mitochondrial peroxiredoxin Prx1, putative                     | Aspergillus fumigatus Af293             | QERAFSDPADFTPVCTTEFLSIDSHIAWMLNIEGKLPATAA  |
| 457 | 0        | 156548262.ref  | XP_001600739.1 | PREDICTED: similar to CG3083-PA                                | Nasonia vitripennis                     |                                            |
| 458 | 0        | 27807167.ref   | NP_777068.1    | anti-oxidant protein 2 (non-selenium glutathione peroxidase)   | Bos taurus                              |                                            |
|     |          | 5902790.sp     | O77834         | PRDX6_BOVIN Peroxiredoxin-6 (Antioxidant protein 2)            | Bos taurus                              | FSHPADFTPVCTTEFLSIDSHIAWMLNIEGKLPATAA      |
|     |          | 3639081.gb     | AAC84043.1     | non-selenium glutathione phospholipid hydroperoxide peroxidase | Bos taurus                              |                                            |
|     |          | 3703050.gb     | AAC63016.1     | ciliary body glutathione peroxidase                            | Bos taurus                              |                                            |
|     |          | 6687043.famb   | CAB64802.1     | non-selenium glutathione phospholipid hydroperoxide peroxidase | Bos taurus                              |                                            |
|     |          | 59858299.gb    | AAOX0894.1     | peroxiredoxin 6                                                | Bos taurus                              |                                            |

|     |          |               |                |                                                              |                                       |  |  |  |  |  |                                         |
|-----|----------|---------------|----------------|--------------------------------------------------------------|---------------------------------------|--|--|--|--|--|-----------------------------------------|
| 459 | 0        | 73587255.gb   | AAI02173.1     | Anti-oxidant protein 2 (non-selenium glutathione peroxidase) | Bos taurus                            |  |  |  |  |  | FSHPKDFTPVCTTEFEVSDHDKKWKGDISATVRQLKL   |
|     |          | 86139391.ref  | ZP_01057960.1  | thiol-specific antioxidant protein                           | Roseobacter sp. MED193                |  |  |  |  |  |                                         |
| 460 | 0        | 85823894.gb   | EAC044100.1    | thiol-specific antioxidant protein                           | Roseobacter sp. MED193                |  |  |  |  |  | FSHPADYTPVCTTELLSVDSHKGWIGDITLTVRQLTD   |
|     |          | 81301258.ref  | YP_401466.1    | Peroxidase                                                   | Synechococcus elongatus PCC 7942      |  |  |  |  |  |                                         |
| 461 | 0        | 81170139.gb   | ABB58479.1     | 1-Cys peroxiredoxin                                          | Synechococcus elongatus PCC 7942      |  |  |  |  |  | FSHPADYTPVCTTELLSVDAHRWEVDITVTRQLTD     |
|     |          | 148556066.ref | YP_001263648.1 | Peroxidase                                                   | Sphingomonas wittichii RW1            |  |  |  |  |  |                                         |
|     |          | 148501256.gb  | ABO69510.1     | 1-Cys peroxiredoxin                                          | Sphingomonas wittichii RW1            |  |  |  |  |  | FSHPADYTPVCTTELLSVDAHRWEVDITVTRQLTD     |
| 462 | 5.37E-12 | 115652356.ref | XP_001183978.1 | PREDICTED: similar to glutathione peroxidase, partial        | Strongylocentrotus purpuratus         |  |  |  |  |  | FSHPADYTPVCTTELLTPEEKRGKLIASGDGRGWI     |
|     |          | 115933957.ref | YP_001191688.1 | PREDICTED: similar to glutathione peroxidase, partial        | Strongylocentrotus purpuratus         |  |  |  |  |  |                                         |
| 463 | 0        | 124265314.ref | XP_001019318.1 | Peroxidase                                                   | Methylobium petroleiphilium PM1       |  |  |  |  |  | QGFLFSHPADFTPVCTTELLSVDSVKHGAWIEDITATVR |
|     |          | 124258089.gb  | ABM93083.1     | 1-Cys peroxiredoxin                                          | Methylobium petroleiphilium PM1       |  |  |  |  |  |                                         |
| 464 | 7.87E-14 | 84701925.gb   | ZP_01016550.1  | alkyl hydroperoxide reductase/ Thiol specific antioxidant    | Parvularcula bermudensis HTCC2503     |  |  |  |  |  | GMMPFAHPADFTPVCTSEFLSIDAHLAWVERITTVVR   |
|     |          | 84691221.gb   | EAG17061.1     | alkyl hydroperoxide reductase/ Thiol specific antioxidant    | Parvularcula bermudensis HTCC2503     |  |  |  |  |  | FSHPADYTPVCTTELLSVDSHKGWIDDITLTVRQLTD   |
| 465 | 0        | 53720358.ref  | YP_109344.1    | putative oxidoreductase                                      | Burkholderia mallei ATCC 23344        |  |  |  |  |  |                                         |
|     |          | 53725605.ref  | YP_103646.1    | antioxidant, AhpC/Tsa family                                 | Burkholderia mallei ATCC 23344        |  |  |  |  |  |                                         |
|     |          | 67643912.ref  | ZP_00442655.1  | COG0450: Peroxiredoxin                                       | Burkholderia mallei GB8 horse 4       |  |  |  |  |  |                                         |
|     |          | 76811032.ref  | YP_334611.1    | antioxidant protein Lsfa                                     | Burkholderia pseudomallei 1710b       |  |  |  |  |  |                                         |
|     |          | 83621648.ref  | ZP_00932056.1  | COG0450: Peroxiredoxin                                       | Burkholderia mallei FMH               |  |  |  |  |  |                                         |
|     |          | 83626503.ref  | ZP_00936727.1  | COG0450: Peroxiredoxin                                       | Burkholderia mallei JHU               |  |  |  |  |  |                                         |
|     |          | 99913801.ref  | ZP_01320398.1  | hypothetical protein Bpse1_03000089                          | Burkholderia pseudomallei 1655        |  |  |  |  |  |                                         |
|     |          | 100064597.ref | ZP_01325988.1  | hypothetical protein BpseP_03000073                          | Burkholderia pseudomallei Pasteur     |  |  |  |  |  |                                         |
|     |          | 100124025.ref | ZP_01329603.1  | hypothetical protein BpseS_03002355                          | Burkholderia pseudomallei S13         |  |  |  |  |  |                                         |
|     |          | 100236792.ref | ZP_01337357.1  | hypothetical protein Bpse4_03000143                          | Burkholderia pseudomallei 406e        |  |  |  |  |  |                                         |
|     |          | 100263158.ref | ZP_01338019.1  | hypothetical protein Bmal2_03004253                          | Burkholderia mallei 2002721280        |  |  |  |  |  |                                         |
|     |          | 100917761.ref | ZP_01346238.1  | hypothetical protein Bmal10_030000941                        | Burkholderia mallei 10399             |  |  |  |  |  |                                         |
|     |          | 121601598.ref | YP_992184.1    | antioxidant, AhpC/Tsa family                                 | Burkholderia mallei SAVP1             |  |  |  |  |  |                                         |
|     |          | 124384211.ref | YP_001028629.1 | antioxidant, AhpC/Tsa family                                 | Burkholderia mallei NCTC 10229        |  |  |  |  |  |                                         |
|     |          | 126448959.ref | YP_001060198.1 | antioxidant protein Lsfa                                     | Burkholderia pseudomallei 668         |  |  |  |  |  |                                         |
|     |          | 126448959.ref | YP_001081469.1 | antioxidant, AhpC/Tsa family                                 | Burkholderia mallei NCTC 10247        |  |  |  |  |  |                                         |
|     |          | 126452406.ref | YP_001067462.1 | antioxidant protein Lsfa                                     | Burkholderia pseudomallei 1109a       |  |  |  |  |  |                                         |
|     |          | 134280460.ref | ZP_01767171.1  | antioxidant protein Lsfa                                     | Burkholderia pseudomallei 305         |  |  |  |  |  |                                         |
|     |          | 161356914.ref | ZP_02102791.1  | antioxidant protein Lsfa                                     | Burkholderia pseudomallei 1108b       |  |  |  |  |  |                                         |
|     |          | 161371239.ref | ZP_02110804.1  | antioxidant protein Lsfa                                     | Burkholderia pseudomallei 1710a       |  |  |  |  |  |                                         |
|     |          | 52210772.bamb | CAH36756.1     | putative oxidoreductase                                      | Burkholderia pseudomallei K96243      |  |  |  |  |  |                                         |
|     |          | 52429028.gb   | AAU49621.1     | antioxidant, AhpC/Tsa family                                 | Burkholderia mallei ATCC 23344        |  |  |  |  |  |                                         |
|     |          | 76580465.gb   | ABA49960.1     | antioxidant protein Lsfa                                     | Burkholderia pseudomallei 1710b       |  |  |  |  |  |                                         |
|     |          | 121230408.gb  | ABM52926.1     | antioxidant, AhpC/Tsa family                                 | Burkholderia mallei SAVP1             |  |  |  |  |  |                                         |
|     |          | 124292231.gb  | ABN01500.1     | antioxidant, AhpC/Tsa family                                 | Burkholderia mallei NCTC 10229        |  |  |  |  |  |                                         |
|     |          | 126219460.gb  | ABN82966.1     | antioxidant protein Lsfa                                     | Burkholderia pseudomallei 668         |  |  |  |  |  |                                         |
|     |          | 126226049.gb  | ABN89588.1     | antioxidant protein Lsfa                                     | Burkholderia pseudomallei 1109a       |  |  |  |  |  |                                         |
|     |          | 126241829.gb  | ABO04922.1     | antioxidant, AhpC/Tsa family                                 | Burkholderia mallei NCTC 10247        |  |  |  |  |  |                                         |
|     |          | 134248467.gb  | EBA48550.1     | antioxidant protein Lsfa                                     | Burkholderia pseudomallei 305         |  |  |  |  |  |                                         |
|     |          | 1477446587.gb | EDK53664.1     | antioxidant, AhpC/Tsa family                                 | Burkholderia mallei FMH               |  |  |  |  |  |                                         |
|     |          | 1477515668.gb | EDK58635.1     | antioxidant, AhpC/Tsa family                                 | Burkholderia mallei JHU               |  |  |  |  |  |                                         |
|     |          | 148025420.gb  | EDK83574.1     | antioxidant, AhpC/Tsa family                                 | Burkholderia mallei 2002721280        |  |  |  |  |  |                                         |
|     |          | 157808837.gb  | EDO86007.1     | antioxidant protein Lsfa                                     | Burkholderia pseudomallei 406e        |  |  |  |  |  |                                         |
|     |          | 157939350.gb  | EDO98520.1     | antioxidant protein Lsfa                                     | Burkholderia pseudomallei 406e        |  |  |  |  |  |                                         |
|     |          | 160696705.gb  | EDP86675.1     | antioxidant, AhpC/Tsa family                                 | Burkholderia mallei ATCC 10399        |  |  |  |  |  |                                         |
| 466 | 0        | 16088765.gb   | BAG03473.1     | peroxiredoxin                                                | Microcystis aeruginosa NIES-843       |  |  |  |  |  | QLGDFSHPADYTPVCTTELLSVDSHRGWINDIINTVTR  |
| 467 | 0        | 73749356.ref  | YP_308595.1    | antioxidant, AhpC                                            | Dehalococcoides sp. CBDB1             |  |  |  |  |  | FSHPADFTPVCTTEFLSVDSHIAWVRVTVTRQENMA    |
|     |          | 73661072.bamb | CAI83679.1     | antioxidant, AhpC                                            | Dehalococcoides sp. CBDB1             |  |  |  |  |  |                                         |
| 468 | 0        | 67527031.ref  | XP_661577.1    | hypothetical protein AN3973.2                                | Aspergillus nidulans FGSC A4          |  |  |  |  |  | PLARQGGKIFSHPADFTPVCTTELLSANSHGDKWKDI   |
|     |          | 40740254.gb   | EAA59444.1     | hypothetical protein AN3973.2                                | Aspergillus nidulans FGSC A4          |  |  |  |  |  |                                         |
| 469 | 0        | 145220000.ref | YP_001130709.1 | peroxiredoxin                                                | Aspergillus nidulans F-GSC 265        |  |  |  |  |  | FSHPADFTPVCTTEFEFFDSHKKWVQWILLDVSNTVTR  |
|     |          | 145206164.gb  | ABP37207.1     | 1-Cys peroxiredoxin / 3-Cys thioredoxin peroxidase           | Prosthecochloris vibriiformis DSM 265 |  |  |  |  |  |                                         |
| 470 | 0        | 126730408.ref | ZP_01746219.1  | thiol-specific antioxidant protein                           | Prosthecochloris vibriiformis DSM 265 |  |  |  |  |  | FSHPKDFTPVCTTEFLQADEHKWKGDISATVRLSID    |
|     |          | 126709141.gb  | EBA08196.1     | thiol-specific antioxidant protein                           | Sagittula stellata E-37               |  |  |  |  |  |                                         |
| 471 | 0        | 83721537.ref  | YP_441934.1    | antioxidant, AhpC/Tsa family                                 | Sagittula stellata E-37               |  |  |  |  |  | FSHPADYTPVCTTELLSVDSHKGWIDDITLTVRQLTD   |
|     |          | 83655362.gb   | ABC39425.1     | antioxidant, AhpC/Tsa family                                 | Burkholderia thailandensis E264       |  |  |  |  |  |                                         |
| 472 | 0        | 154311606.ref | XP_001555132.1 | hypothetical protein BC1G_06262                              | Burkholderia thailandensis E264       |  |  |  |  |  |                                         |
|     |          | 150850773.gb  | EDN25966.1     | hypothetical protein BC1G_06262                              | Botryotinia fuckeliana B05.10         |  |  |  |  |  |                                         |
| 473 | 8.60E-15 | 45185491.ref  | NP_983207.1    | ACL197Wp                                                     | Botryotinia fuckeliana B05.10         |  |  |  |  |  | FSHPADFTPVCTTEITHVWKWIKDILLDGPVPLRQEKY  |
|     |          | 44981209.gb   | AAS51031.1     | ACL197Wp                                                     | Ashyba gossypii ATCC 10895            |  |  |  |  |  |                                         |
| 474 | 0        | 110678013.ref | YP_681020.1    | antioxidant, AhpC/Tsa family, putative                       | Ashyba gossypii ATCC 10895            |  |  |  |  |  | FSHPKDFTPVCTTEFEVSDHDKKWKGDISATVRLKL    |
|     |          |               |                | antioxidant, AhpC/Tsa family, putative                       | Roseobacter denitrificans OCh 114     |  |  |  |  |  |                                         |

|     |          |               |                |                                                          |                                             |                                           |
|-----|----------|---------------|----------------|----------------------------------------------------------|---------------------------------------------|-------------------------------------------|
| 475 | 6.19E-20 | 109454129 gb  | ABG30334.1     | antioxidant, AhpC/Tsa family, putative                   | Roseobacter denitrificans OCh 114           | SSHPRDFTPVCTTELLSIDDHLAWSKDAEKDPEISR      |
| 476 | 0        | 119908585 ref | XP_001252846.1 | PREDICTED: similar to non-selenium glutathione prospi    | Bos taurus                                  | FSHPGDFTPVCTTELEHFKWKKDPIFTRFVIDVEKD      |
| 477 | 0        | 164648130 gb  | EDR1237.3      | cysteine peroxidase                                      | Laccaria bicolor S238N-H82                  | FSHPADFTPVCTTELEEFDLSDVSHHFWIKDIDETER     |
| 478 | 0        | 88806117 ref  | ZP_01121635.1  | putative antioxidant protein                             | Robignitalea biformata HTCC2501             | FSHPADFTPVCTTELEEFDLSDVSHHFWIKDIDETER     |
| 479 | 0        | 88783728 gb   | EAR14897.1     | putative antioxidant protein                             | Robignitalea biformata HTCC2501             | FSHPADFTPVCTTELEEFDLSDVSHHFWIKDIDETER     |
| 480 | 0        | 114569049 ref | YP_755729.1    | Peroxidase                                               | Maricaulis maris MCS10                      | FSHPADFTPVCTTELEEFDLSDVSHHFWIKDIDETER     |
| 481 | 0        | 114339511 gb  | ABI64791.1     | 1-Cys peroxidase                                         | Maricaulis maris MCS10                      | FSHPADFTPVCTTELEEFDLSDVSHHFWIKDIDETER     |
| 482 | 0        | 146452568 gb  | EDK46824.1     | mitochondrial peroxidase PRX1                            | Loederomyces elongisporus NRRL YB-4239      | FSHPADFTPVCTTELEEFDLSDVSHHFWIKDIDETER     |
| 483 | 0        | 109631696 gb  | ABG36022.1     | glutathione peroxidase                                   | Loederomyces elongisporus NRRL YB-4239      | FSHPADFTPVCTTELEEFDLSDVSHHFWIKDIDETER     |
| 484 | 0        | 134294860 ref | YP_001118595.1 | Peroxidase                                               | Burkholderia vietnamiensis G4               | FSHPADFTPVCTTELEEFDLSDVSHHFWIKDIDETER     |
| 485 | 0        | 134138017 gb  | ABO53760.1     | Peroxidase                                               | Burkholderia vietnamiensis G4               | FSHPADFTPVCTTELEEFDLSDVSHHFWIKDIDETER     |
| 486 | 0        | 83989024 ref  | ZP_00952545.1  | alkyl hydroperoxide reductase                            | Oceanicaulis alexandrii HTCC2833            | NEKATHGERFHPADFTPVCTTEFLSIDAHIAHWVRNI     |
| 487 | 0        | 83852471 gb   | EAP90324.1     | alkyl hydroperoxide reductase                            | Oceanicaulis alexandrii HTCC2833            | NEKATHGERFHPADFTPVCTTEFLSIDAHIAHWVRNI     |
| 488 | 0        | 125808647 ref | XP_001360817.1 | GA11614-PA                                               | Drosophila pseudoobscura                    | FSHPADFTPVCTTELEEFDLSDVSHHFWIKDIDETER     |
| 489 | 0        | 54635989 gb   | EAL25392.1     | GA11614-PA                                               | Drosophila pseudoobscura                    | FSHPADFTPVCTTELEEFDLSDVSHHFWIKDIDETER     |
| 490 | 0        | 16329971 ref  | NP_440699.1    | rehydrin                                                 | Synechocystis sp. PCC 6803                  | QLGDFSHPADYTPVCTTELEEFDLSDVSHHFWIKDIDETER |
| 491 | 0        | 1652457 dbj   | BAA17379.1     | rehydrin                                                 | Synechocystis sp. PCC 6803                  | QLGDFSHPADYTPVCTTELEEFDLSDVSHHFWIKDIDETER |
| 492 | 0        | 150024999 ref | YP_001295825.1 | Probable peroxidase                                      | Flavobacterium psychrophilum JIP0286        | TGMFLSHPADFTPVCTTELEEFDLSDVSHHFWIKDIDETER |
| 493 | 0        | 149771540 emb | CAL43009.1     | Probable peroxidase                                      | Flavobacterium psychrophilum JIP0286        | TGMFLSHPADFTPVCTTELEEFDLSDVSHHFWIKDIDETER |
| 494 | 0        | 126178114 ref | YP_001046079.1 | Peroxidase                                               | Flavobacterium psychrophilum JIP0286        | TGMFLSHPADFTPVCTTELEEFDLSDVSHHFWIKDIDETER |
| 495 | 0        | 125860908 gb  | ABN56097.1     | 3-Cys thioredoxin peroxidase                             | Methanococcus marisnigri JR1                | FSHPADFTPVCTTELEEFDLSDVSHHFWIKDIDETER     |
| 496 | 0        | 88819111 ref  | ZP_01127164.1  | Peroxidase                                               | Methanococcus marisnigri JR1                | FSHPADFTPVCTTELEEFDLSDVSHHFWIKDIDETER     |
| 497 | 0        | 88790795 gb   | EAR21909.1     | Peroxidase                                               | Methanococcus marisnigri JR1                | FSHPADFTPVCTTELEEFDLSDVSHHFWIKDIDETER     |
| 498 | 0        | 115397657 ref | XP_001214520.1 | mitochondrial peroxidase PRX1                            | Nitrococcus mobilis Nb-231                  | YSHPADFTPVCTTELEEFDLSDVSHHFWIKDIDETER     |
| 499 | 0        | 114192711 gb  | EAU34411.1     | mitochondrial peroxidase PRX1                            | Nitrococcus mobilis Nb-231                  | YSHPADFTPVCTTELEEFDLSDVSHHFWIKDIDETER     |
| 500 | 0        | 157314444 gb  | ABV33543.1     | alkyl hydroperoxide reductase/Thiol specific antioxidant | Aspergillus terreus NIH2624                 | QERAFSHPDFTPICITTELEFTARLSANSHHAWIKDI     |
| 501 | 0        | 89210317 ref  | ZP_01188707.1  | alkyl hydroperoxide reductase/Thiol specific antioxidant | Aspergillus terreus NIH2624                 | QERAFSHPDFTPICITTELEFTARLSANSHHAWIKDI     |
| 502 | 0        | 89159966 gb   | EAR79624.1     | alkyl hydroperoxide reductase/Thiol specific antioxidant | Thermotoga litoralis OCH 149                | FSHPADFTPVCTTELEEFDLSDVSHHFWIKDIDETER     |
| 503 | 0        | 73538809 ref  | YP_299176.1    | Peroxidase                                               | Thermotoga litoralis OCH 149                | FSHPADFTPVCTTELEEFDLSDVSHHFWIKDIDETER     |
| 504 | 0        | 72122148 gb   | AAZ64332.1     | Peroxidase                                               | Thermotoga litoralis OCH 149                | FSHPADFTPVCTTELEEFDLSDVSHHFWIKDIDETER     |
| 505 | 0        | 163703213 ref | ZP_02122046.1  | Peroxidase                                               | Ralstonia eutropha JMP134                   | QGTIFSHPKDFTPVCTTELEEFDLSDVSHHFWIKDIDETER |
| 506 | 0        | 162430536 gb  | EDQ41147.1     | Peroxidase                                               | Ralstonia eutropha JMP134                   | QGTIFSHPKDFTPVCTTELEEFDLSDVSHHFWIKDIDETER |
| 507 | 0        | 114319990 ref | YP_741673.1    | 1-Cys peroxidase                                         | Methylobacterium nodulans ORS 2060          | FSHPKDFTPVCTTELEEFDLSDVSHHFWIKDIDETER     |
| 508 | 0        | 114226384 gb  | ABI56183.1     | 1-Cys peroxidase                                         | Methylobacterium nodulans ORS 2060          | FSHPKDFTPVCTTELEEFDLSDVSHHFWIKDIDETER     |
| 509 | 0        | 125984782 ref | XP_001356155.1 | GA15914-PA                                               | Alkallimnicola ehrlichi MLHE-1              | FSHPADFTPVCTTELEEFDLSDVSHHFWIKDIDETER     |
| 510 | 0        | 5464474 gb    | EAL33215.1     | GA15914-PA                                               | Alkallimnicola ehrlichi MLHE-1              | FSHPADFTPVCTTELEEFDLSDVSHHFWIKDIDETER     |
| 511 | 0        | 163734278 ref | ZP_02141718.1  | antioxidant, AhpC/Tsa family, putative                   | Drosophila pseudoobscura                    | FSHPADFTPVCTTELEEFDLSDVSHHFWIKDIDETER     |
| 512 | 0        | 161392286 gb  | EDQ16675.1     | antioxidant, AhpC/Tsa family, putative                   | Roseobacter litoralis OCH 149               | FSHPKDFTPVCTTELEEFDLSDVSHHFWIKDIDETER     |
| 513 | 0        | 109631700 gb  | ABG36024.1     | glutathione peroxidase                                   | Roseobacter litoralis OCH 149               | FSHPKDFTPVCTTELEEFDLSDVSHHFWIKDIDETER     |
| 514 | 0        | 109631702 gb  | ABG36025.1     | glutathione peroxidase                                   | Roseobacter litoralis OCH 149               | FSHPKDFTPVCTTELEEFDLSDVSHHFWIKDIDETER     |
| 515 | 0        | 73961355 ref  | XP_537190.2    | PREDICTED: similar to Peroxiredoxin 6 (Antioxidant pro   | Helianthus annuus                           | FSHPGDFTPVCTTELEEFDLSDVSHHFWIKDIDETER     |
| 516 | 0        | 71733726 ref  | YP_276996.1    | antioxidant, AhpC/Tsa family                             | Helianthus annuus                           | FSHPGDFTPVCTTELEEFDLSDVSHHFWIKDIDETER     |
| 517 | 0        | 71554279 gb   | AAZ33490.1     | antioxidant, AhpC/Tsa family                             | Canis familiaris                            | FSHPKDFTPVCTTELEEFDLSDVSHHFWIKDIDETER     |
| 518 | 0        | 160877634 pdb | 2E2G           | A Chain A, Crystall Structure Of Archaeal Peroxiredoxin, | Pseudomonas syringae pv. phaseolicola 1448A | FSHPADFTPVCTTELEEFDLSDVSHHFWIKDIDETER     |
| 519 | 0        | 160877635 pdb | 2E2G           | B Chain B, Crystall Structure Of Archaeal Peroxiredoxin, | Pseudomonas syringae pv. phaseolicola 1448A | FSHPADFTPVCTTELEEFDLSDVSHHFWIKDIDETER     |
| 520 | 0        | 160877636 pdb | 2E2G           | C Chain C, Crystall Structure Of Archaeal Peroxiredoxin, | Aeropyrum Permix K1                         | QKWFHSPADFTPVCTTEFLSVDSHHKWIKDIDETER      |
| 521 | 0        | 160877637 pdb | 2E2G           | D Chain D, Crystall Structure Of Archaeal Peroxiredoxin, | Aeropyrum Permix K2                         | QKWFHSPADFTPVCTTEFLSVDSHHKWIKDIDETER      |
| 522 | 0        | 160877638 pdb | 2E2G           | E Chain E, Crystall Structure Of Archaeal Peroxiredoxin, | Aeropyrum Permix K3                         | QKWFHSPADFTPVCTTEFLSVDSHHKWIKDIDETER      |
| 523 | 0        | 160877639 pdb | 2E2G           | F Chain F, Crystall Structure Of Archaeal Peroxiredoxin, | Aeropyrum Permix K4                         | QKWFHSPADFTPVCTTEFLSVDSHHKWIKDIDETER      |
| 524 | 0        | 160877640 pdb | 2E2G           | G Chain G, Crystall Structure Of Archaeal Peroxiredoxin, | Aeropyrum Permix K5                         | QKWFHSPADFTPVCTTEFLSVDSHHKWIKDIDETER      |
| 525 | 0        | 160877641 pdb | 2E2G           | H Chain H, Crystall Structure Of Archaeal Peroxiredoxin, | Aeropyrum Permix K6                         | QKWFHSPADFTPVCTTEFLSVDSHHKWIKDIDETER      |
| 526 | 0        | 160877642 pdb | 2E2G           | I Chain I, Crystall Structure Of Archaeal Peroxiredoxin, | Aeropyrum Permix K7                         | QKWFHSPADFTPVCTTEFLSVDSHHKWIKDIDETER      |
| 527 | 0        | 160877643 pdb | 2E2G           | J Chain J, Crystall Structure Of Archaeal Peroxiredoxin, | Aeropyrum Permix K8                         | QKWFHSPADFTPVCTTEFLSVDSHHKWIKDIDETER      |
| 528 | 0        | 118700339 ref | ZP_01558408.1  | Peroxidase                                               | Aeropyrum Permix K9                         | QKWFHSPADFTPVCTTEFLSVDSHHKWIKDIDETER      |
| 529 | 0        | 118642002 gb  | EAV48845.1     | Peroxidase                                               | Aeropyrum Permix K10                        | QKWFHSPADFTPVCTTEFLSVDSHHKWIKDIDETER      |
| 530 | 0        | 21226916 ref  | NP_632838.1    | peroxidase                                               | Burkholderia ambifaria MC40-6               | FSHPADFTPVCTTELEEFDLSDVSHHFWIKDIDETER     |
| 531 | 0        | 23822244 sp   | Q8PYF6         | TDXH_ME1MA Probable peroxidase                           | Burkholderia ambifaria MC40-6               | FSHPADFTPVCTTELEEFDLSDVSHHFWIKDIDETER     |
| 532 | 0        | 20905224 gb   | AAM30510.1     | putative peroxidase                                      | Meihausarcina mazel Go1                     | FSHPADFTPVCTTELEEFDLSDVSHHFWIKDIDETER     |
| 533 | 0        | 163794920 ref | ZP_02188889.1  | peroxidase                                               | Meihausarcina mazel Go1                     | FSHPADFTPVCTTELEEFDLSDVSHHFWIKDIDETER     |
| 534 | 0        | 159179739 gb  | EDP64266.1     | Peroxiredoxin                                            | Methanosarcina mazel Go1                    | QLGDFSHPKDFTPVCTTELEEFDLSDVSHHFWIKDIDETER |
| 535 | 0        | 24652434 ref  | NP_724931.1    | Peroxiredoxin 2540 CG12405-PA, isoform A                 | alpha proteobacterium BAL199                | FSHPADFTPVCTTELEEFDLSDVSHHFWIKDIDETER     |
| 536 | 0        | 73037478 gb   | AAF58797.1     | CG12405-PA                                               | Drosophila melanogaster                     | FSHPADFTPVCTTELEEFDLSDVSHHFWIKDIDETER     |

|     |   |           |     |               |                     |                                     |                                        |
|-----|---|-----------|-----|---------------|---------------------|-------------------------------------|----------------------------------------|
| 505 | 0 | 88813380  | ref | ZP_01128617.1 | Peroxidase          | Nitrococcus mobilis Nb-231          | FSHPKDFTPVCTTELLSVDDHREWLKDFIPATYGGGED |
|     |   | 88789348  | gpb | EAR20476.1    | Peroxidase          | Nitrococcus mobilis Nb-231          |                                        |
| 506 | 0 | 149201029 | ref | ZP_01878004.1 | Peroxidase          | Roseovarius sp. TMT035              | FSHPKDFTPVCTTEFVSVDDHRKWKGDISA TVRQLKL |
|     |   | 149145362 | gpb | EDM333888.1   | Peroxidase          | Roseovarius sp. TMT035              |                                        |
| 507 | 0 | 115525976 | ref | YP_782887.1   | Peroxidase          | Rhodospseudomonas pallustris BisA53 | VL TASF SHPADFTPVCTTEFLSDSHLAWVGNIGLQ  |
|     |   | 115519923 | gpb | ABJ07907.1    | 1-Cys peroxiredoxin | Rhodospseudomonas pallustris BisA53 |                                        |



| Hit# | p-value  | gi number | db  | protein accession | Name                                                       | Species                                         | Active Site Signature                       |
|------|----------|-----------|-----|-------------------|------------------------------------------------------------|-------------------------------------------------|---------------------------------------------|
| 1    | 3.44E-17 | 89256354  | ref | YP_513716.1       | AhpC/TSA family protein                                    | <i>Francisella tularensis</i> subsp. holarctica | FSLPGAFPTCSTYQLPRFKELGIDEVLSVNGNGEFGKRSWRY  |
|      |          | 115314799 | ref | YP_763522.1       | peroxidorexin                                              | <i>Francisella tularensis</i> subsp. holarctica |                                             |
|      |          | 156502437 | ref | YP_001428502.1    | hybrid peroxidorexin hyPrx5                                | <i>Francisella tularensis</i> subsp. holarctica |                                             |
|      |          | 891441185 | emb | CAJ79454.1        | AhpC/TSA family protein                                    | <i>Francisella tularensis</i> subsp. holarctica |                                             |
|      |          | 115129698 | gb  | AB182885.1        | peroxidorexin                                              | <i>Francisella tularensis</i> subsp. holarctica |                                             |
|      |          | 134253502 | gb  | EBA52596.1        | ahpC/TSA family protein                                    | <i>Francisella tularensis</i> subsp. holarctica |                                             |
|      |          | 156253040 | gb  | ABU61546.1        | AhpC/Tsa family, antioxidant protein                       | <i>Francisella tularensis</i> subsp. holarctica |                                             |
|      |          | 157122278 | gb  | EDO66418.1        | AhpC/TSA family protein                                    | <i>Francisella tularensis</i> subsp. holarctica |                                             |
| 2    | 2.11E-16 | 114769628 | ref | ZP_01447238.1     | antioxidant, AhpC/Tsa family protein                       | <i>alpha proteobacterium</i> HTCC2255           | GPVAFGLPGAYTNTCSTAHMPCLAVNMKSWAKDMFGRSQRY   |
|      |          | 114549333 | gb  | EAU52215.1        | antioxidant, AhpC/Tsa family protein                       | <i>alpha proteobacterium</i> HTCC2255           |                                             |
| 3    | 2.14E-09 | 146415758 | ref | XP_001483849.1    | hypothetical protein PGUG_04578                            | <i>Pichia guilliermondii</i> ATCC 6260          | TSAPGAFPTCTEQHVPILTANVAAWGKALLTGAFLRTGRY    |
|      |          | 146392322 | gb  | EDK40480.1        | hypothetical protein PGUG_04578                            | <i>Pichia guilliermondii</i> ATCC 6260          |                                             |
| 4    | 0        | 33601987  | ref | NP_889547.1       | putative glutaredoxin                                      | <i>Bordetella bronchiseptica</i> RB50           | FSLPGAFPTCSSTHLPVCSVNMMEWAKDQNGNGEFGKRSWRY  |
|      |          | 33576425  | emb | CAE33503.1        | putative glutaredoxin                                      | <i>Bordetella bronchiseptica</i> RB50           |                                             |
| 5    | 2.42E-17 | 149184285 | ref | ZP_01862603.1     | AhpC/TSA family protein                                    | <i>Erythrobacter</i> sp. SD-21                  | FAVPGAFPTCSAKHLPATSVNVMGAWKQSAENGEMGHRSQRY  |
|      |          | 148831605 | gb  | EDL50038.1        | AhpC/TSA family protein                                    | <i>Erythrobacter</i> sp. SD-21                  |                                             |
| 6    | 0        | 145352465 | ref | XP_001420565.1    | predicted protein                                          | <i>Ostreococcus lucimarinus</i> CCE9901         | FAVPGAFPTCSTKHLPGVDECVSNVMNAWGNWSAMGTRRRY   |
|      |          | 144580800 | gb  | ABO98858.1        | predicted protein                                          | <i>Ostreococcus lucimarinus</i> CCE9901         |                                             |
| 7    | 0        | 57099689  | ref | XP_533241.1       | PREDICTED: similar to Peroxidorexin 5, mitochondrial prece | <i>Canis familiaris</i>                         | FGVPGAFTPGCKSTHLPCLSVNVTAWGRAHGNHRLKRFGTGL  |
|      |          | 15642632  | ref | NP_232265.1       | peroxidorexin family protein/glutaredoxin                  | <i>Vibrio cholerae</i> O1 biovar eltor str.     | FSLPGAFPTCSSTHLPVCSVNMNAWAKDQNGNGEFGKRSWRY  |
|      |          | 121587911 | ref | ZP_01677666.1     | peroxidorexin family protein/glutaredoxin                  | <i>Vibrio cholerae</i> 2740-80                  |                                             |
|      |          | 121727592 | ref | ZP_01680700.1     | peroxidorexin family protein/glutaredoxin                  | <i>Vibrio cholerae</i> V52                      |                                             |
|      |          | 147651129 | ref | YP_001218130.1    | peroxidorexin family protein/glutaredoxin                  | <i>Vibrio cholerae</i> O395                     |                                             |
|      |          | 153213977 | ref | ZP_01949170.1     | peroxidorexin family protein/glutaredoxin                  | <i>Vibrio cholerae</i> 1587                     |                                             |
|      |          | 153224207 | ref | ZP_01954293.1     | peroxidorexin family protein/glutaredoxin                  | <i>Vibrio cholerae</i> MAK 757                  |                                             |
|      |          | 153819461 | ref | ZP_01972128.1     | peroxidorexin family protein/glutaredoxin                  | <i>Vibrio cholerae</i> NCTC 8457                |                                             |
|      |          | 153821573 | ref | ZP_01974240.1     | peroxidorexin family protein/glutaredoxin                  | <i>Vibrio cholerae</i> B33                      |                                             |
|      |          | 153825079 | ref | ZP_01977746.1     | peroxidorexin family protein/glutaredoxin                  | <i>Vibrio cholerae</i> MZO-2                    |                                             |
|      |          | 9657228   | gb  | AAF95778.1        | peroxidorexin family protein/glutaredoxin                  | <i>Vibrio cholerae</i> O1 biovar eltor str.     |                                             |
|      |          | 121547816 | gb  | EAX57902.1        | peroxidorexin family protein/glutaredoxin                  | <i>Vibrio cholerae</i> 2740-80                  |                                             |
|      |          | 121630083 | gb  | EAX62488.1        | peroxidorexin family protein/glutaredoxin                  | <i>Vibrio cholerae</i> V52                      |                                             |
|      |          | 124115547 | gb  | EAY34367.1        | peroxidorexin family protein/glutaredoxin                  | <i>Vibrio cholerae</i> 1587                     |                                             |
|      |          | 124117777 | gb  | EAY36520.1        | peroxidorexin family protein/glutaredoxin                  | <i>Vibrio cholerae</i> MAK 757                  |                                             |
|      |          | 125619186 | gb  | EAZ47116.1        | peroxidorexin family protein/glutaredoxin                  | <i>Vibrio cholerae</i> MO10                     |                                             |
|      |          | 125622017 | gb  | EAZ50340.1        | peroxidorexin family protein/glutaredoxin                  | <i>Vibrio cholerae</i> V51                      |                                             |
|      |          | 126510002 | gb  | EAZ72596.1        | peroxidorexin family protein/glutaredoxin                  | <i>Vibrio cholerae</i> NCTC 8457                |                                             |
|      |          | 126520958 | gb  | EAZ78181.1        | peroxidorexin family protein/glutaredoxin                  | <i>Vibrio cholerae</i> B33                      |                                             |
|      |          | 146317012 | gb  | ABQ21551.1        | peroxidorexin family protein/glutaredoxin                  | <i>Vibrio cholerae</i> O395                     |                                             |
|      |          | 149741225 | gb  | EDM55267.1        | peroxidorexin family protein/glutaredoxin                  | <i>Vibrio cholerae</i> MZO-2                    |                                             |
|      |          | 150421254 | gb  | EDN13537.1        | peroxidorexin family protein/glutaredoxin                  | <i>Vibrio cholerae</i> RC386                    |                                             |
|      |          | 150424014 | gb  | EDN15953.1        | peroxidorexin family protein/glutaredoxin                  | <i>Vibrio cholerae</i> AM-19226                 |                                             |
| 9    | 3.76E-19 | 153833675 | ref | ZP_01986342.1     | redoxin domain protein                                     | <i>Vibrio Harveyi</i> HY01                      | FAVPGAFPTCSEAHLPVCSVNMVAWGEAQDTGGGGVRSQRY   |
|      |          | 148870073 | gb  | EDL69028.1        | redoxin domain protein                                     | <i>Vibrio Harveyi</i> HY01                      |                                             |
|      |          | 156449923 | ref | ZP_02056304.1     | Redoxin domain protein                                     | <i>Methylobacterium chloromethanicum</i>        | GPDGVGVPGAFIPACHRNHLPVTSVNVNVAWQQQSLGPRSQRY |
| 10   | 9.66E-11 | 163852015 | ref | YP_001640058.1    | Redoxin domain protein                                     | <i>Methylobacterium extorquens</i> PA1          |                                             |
|      |          | 156191026 | gb  | EDQ23214.1        | Redoxin domain protein                                     | <i>Methylobacterium chloromethanicum</i>        |                                             |
|      |          | 163663620 | gb  | ABY30987.1        | Redoxin domain protein                                     | <i>Methylobacterium extorquens</i> PA1          |                                             |
| 11   | 3.31E-17 | 56707687  | ref | YP_169583.1       | AhpC/TSA family protein                                    | <i>Francisella tularensis</i> subsp. tularensis | FSLPGAFPTCSTYQLPRFKELGIDEVLSVNGNGEFGKRSWRY  |
|      |          | 110670158 | ref | YP_666715.1       | AhpC/TSA family protein                                    | <i>Francisella tularensis</i> subsp. tularensis |                                             |
|      |          | 118497550 | ref | YP_898600.1       | peroxidorexin, AhpC-TSA family protein                     | <i>Francisella tularensis</i> subsp. novicida   |                                             |
|      |          | 134301967 | ref | YP_001121936.1    | AhpC/TSA family protein                                    | <i>Francisella tularensis</i> subsp. tularensis |                                             |
|      |          | 56604179  | emb | CAG45190.1        | AhpC/TSA family protein                                    | <i>Francisella tularensis</i> subsp. tularensis |                                             |
|      |          | 110320491 | emb | CAL08573.1        | AhpC/TSA family protein                                    | <i>Francisella tularensis</i> subsp. tularensis |                                             |
|      |          | 118423456 | gb  | ABK89846.1        | peroxidorexin, AhpC-TSA family protein                     | <i>Francisella tularensis</i> subsp. novicida   |                                             |
|      |          | 134049744 | gb  | ABC46815.1        | AhpC/TSA family protein                                    | <i>Francisella tularensis</i> subsp. tularensis |                                             |
|      |          | 151568439 | gb  | EDN34093.1        | peroxidorexin                                              | <i>Francisella tularensis</i> subsp. tularensis |                                             |
|      |          | 151570638 | gb  | EDN36292.1        | AhpC/TSA family protein                                    | <i>Francisella tularensis</i> subsp. novicida   |                                             |

|    |          |               |                |                                                                   |                                        |                                                 |
|----|----------|---------------|----------------|-------------------------------------------------------------------|----------------------------------------|-------------------------------------------------|
| 12 |          | 151572085.gb  | EDN37739.1     | peroxidoredoxin                                                   | Francisella tularensis subsp. novicida | FSLPGAFTPTCSSSHLPCVSVNVMNAWKAQDGNNGEFGKRSWRY    |
|    | 0        | 163803096.ref | ZP_02196980.1  | bifunctional argininosuccinate lyase/N-acetylglutamate synthetase | Vibrio campbellii AND4                 | FSLPGAFTPTCSSSHLPCVSVNVMNAWKAQDGNNGEFGKRSWRY    |
|    |          | 159173088.gb  | EDP57920.1     | bifunctional argininosuccinate lyase/N-acetylglutamate synthetase | Vibrio campbellii AND4                 | FSLPGAFTPTCSSSHLPCVSVNVMNAWKAQDGNNGEFGKRSWRY    |
| 13 | 3.14E-11 | 163770187.gb  | EDQ84010.1     | predicted protein                                                 | Monosiga brevicollis MX1               | FGVPGAFTPGCHKTHLPGKIGCMGVNVMAGWGETVGSGRCKRF     |
| 14 | 2.67E-18 | 152981331.ref | YP_001354699.1 | peroxidoredoxin                                                   | Janthinobacterium sp. Marseille        | FAVPGAFTPTCSEQHAPGVDECVSNVMGAWGREQLGVRSQRY      |
|    |          | 151281408.gb  | ABR89818.1     | peroxidoredoxin                                                   | Janthinobacterium sp. Marseille        | FAVPGAFTPTCSEQHAPGVDECVSNVMGAWGREQLGVRSQRY      |
| 15 | 2.47E-16 | 146343358.ref | YP_001208406.1 | Putative peroxidoredoxin                                          | Bradyrhizobium sp. ORS278              | MTGEFAVPGAYGTGCHKMHLPIVSNVMNAWKRDLTGIRSKRY      |
|    |          | 146196164.emb | CAL80191.1     | Putative peroxidoredoxin                                          | Bradyrhizobium sp. ORS278              | MTGEFAVPGAYGTGCHKMHLPIVSNVMNAWKRDLTGIRSKRY      |
| 16 | 0        | 90407070.ref  | ZP_01215259.1  | glutaredoxin                                                      | Psychromonas sp. CNPT3                 | FALPGAFTPTCSSSTHLPCLAVNVMNAWLDQGGSEFGKRSWRY     |
|    |          | 90311792.gb   | EAS39888.1     | glutaredoxin                                                      | Psychromonas sp. CNPT3                 | FALPGAFTPTCSSSTHLPCLAVNVMNAWLDQGGSEFGKRSWRY     |
| 17 | 4.18E-12 | 156039413.ref | XP_001586814.1 | hypothetical protein SS1G_11843                                   | Sclerotinia sclerotiorum 1980          | IGVPAAFSPSCSNHPIVAVNVTKAWGSTLPTGEGGPRSKRY       |
|    |          | 154697580.gb  | EDN97318.1     | hypothetical protein SS1G_11843                                   | Sclerotinia sclerotiorum 1980          | IGVPAAFSPSCSNHPIVAVNVTKAWGSTLPTGEGGPRSKRY       |
| 18 | 0        | 88706713.ref  | ZP_01103423.1  | peroxidoredoxin                                                   | gamma proteobacterium KT 71            | FSLPGAFTPTCSSNHLPELVEEFAKQCVSVNNGNVEFGMRSWRY    |
|    |          | 88700226.gb   | EAQ97335.1     | peroxidoredoxin                                                   | Congregibacter litoralis K171          | FSLPGAFTPTCSSNHLPELVEEFAKQCVSVNNGNVEFGMRSWRY    |
| 19 | 0        | 153095138.gb  | EDN75685.1     | peroxidoredoxin/glutaredoxin family protein                       | Mannheimia haemolytica PHL213          | FSLPGAFTPTCSSSTHLPCLAVNVMNAWKAQDGNNGEFGKRSWRY   |
| 20 | 4.70E-13 | 145236679.ref | XP_001390987.1 | hypothetical protein An05g01660                                   | Aspergillus niger                      | GKGVGVPAAFSPACSSTHPVPVAVNVTKAWATSLGNNSKRY       |
|    |          | 134076448.emb | CAK48009.1     | unnamed protein product                                           | Aspergillus niger                      | GKGVGVPAAFSPACSSTHPVPVAVNVTKAWATSLGNNSKRY       |
| 21 | 3.69E-17 | 145298268.ref | YP_001141109.1 | peroxidoredoxin                                                   | Aeromonas salmonicida subsp.           | FAVPGAFTPTCSNAHLPCVSNVMNAWQVVAQETGAGGLRAQRF     |
|    |          | 142851040.gb  | ABO89361.1     | peroxidoredoxin                                                   | Aeromonas salmonicida subsp.           | FAVPGAFTPTCSNAHLPCVSNVMNAWQVVAQETGAGGLRAQRF     |
| 22 | 6.91E-13 | 124022540.ref | YP_001016847.1 | Peroxidoredoxin                                                   | Prochlorococcus marinus str. MIT 9303  | LALPGAFTPTCSSNHLPLCLSVNNGNEGELRSWRYMAGVSSPRR    |
|    |          | 123962826.gb  | ABM77582.1     | Peroxidoredoxin                                                   | Prochlorococcus marinus str. MIT 9303  | LALPGAFTPTCSSNHLPLCLSVNNGNEGELRSWRYMAGVSSPRR    |
| 23 | 1.39E-10 | 126728473.ref | ZP_01744289.1  | AhpC/TSA family protein                                           | Sagittula stellata E-37                | GPETFALPGAFTGTCINAHVPCIAVNFYDRSKRYCEKSCSEAM     |
|    |          | 126711438.gb  | EBA10488.1     | AhpC/TSA family protein                                           | Sagittula stellata E-37                | GPETFALPGAFTGTCINAHVPCIAVNFYDRSKRYCEKSCSEAM     |
| 24 | 0        | 121634748.ref | YP_974993.1    | putative redoxin                                                  | Neisseria meningitidis FAM18           | FSLPGAFTPTCSSSHLPCVSVNVMNAWAAEEGNGEFGKRSWRY     |
|    |          | 120866454.emb | CAM10200.1     | putative redoxin                                                  | Neisseria meningitidis FAM18           | FSLPGAFTPTCSSSHLPCVSVNVMNAWAAEEGNGEFGKRSWRY     |
| 25 | 7.22E-14 | 39937328.ref  | NP_949604.1    | peroxidoredoxin-like protein                                      | Rhodopseudomonas palustris CGA009      | FAVPGAFTGTCCHKMHLDPKGVIVSNVMSAWKRDLTGTRSLRY     |
|    |          | 39851186.emb  | CAE29709.1     | peroxidoredoxin-like protein                                      | Rhodopseudomonas palustris CGA009      | FAVPGAFTGTCCHKMHLDPKGVIVSNVMSAWKRDLTGTRSLRY     |
| 26 | 0        | 77957410.ref  | ZP_00821467.1  | peroxidoredoxin                                                   | Yersinia bercovieri ATCC 43970         | FSLPGAFTPTCSSSHLPCVSVNVMNAWKAQDGNNGEFGKRSWRY    |
|    |          | 84390826.ref  | ZP_00991518.1  | glutaredoxin                                                      | Vibrio splendidus 12B01                | FSLPGAFTPTCSSSHLPCVSVNVMNAWKAQDGNNGEFGKRSWRY    |
|    |          | 84376629.gb   | EAP93506.1     | glutaredoxin                                                      | Vibrio splendidus 12B01                | FSLPGAFTPTCSSSHLPCVSVNVMNAWKAQDGNNGEFGKRSWRY    |
| 28 | 0        | 166091392.gb  | BAG06100.1     | putative peroxidoredoxin                                          | Microcystis aeruginosa NIES-843        | FALPGAFTPTCSTSHLPCVSNVMNAWKAQDGNNGEFGKRSWRY     |
| 29 | 0        | 149139360.ref | ZP_01874393.1  | putative peroxidoredoxin/glutaredoxin family protein              | Leptisphaera araneosa HTCC2155         | FALPGAFTPTCSSTHLPCVSNVMNAWAAQDGNNGEFGKRSWRY     |
|    |          | 149139360.gb  | EDM27762.1     | putative peroxidoredoxin/glutaredoxin family protein              | Leptisphaera araneosa HTCC2155         | FALPGAFTPTCSSTHLPCVSNVMNAWAAQDGNNGEFGKRSWRY     |
| 30 | 0        | 50897517.gb   | AA185821.1     | putative peroxidoredoxin                                          | Glossina morsitans morsitans           | FGVPGAFTPGCSKTHLPCVSNVMSAWGKEHGGHRSKRFGTGL      |
| 31 | 8.78E-19 | 163746220.ref | ZP_02153578.1  | peroxidoredoxin/glutaredoxin family protein                       | Oceanobolus indolifex HEL-45           | FSLPGAFTPTCSTYQLPCLSVNVMNAWKEWQGGSEFGARSWRY     |
|    |          | 161380105.gb  | EDQ04516.1     | peroxidoredoxin/glutaredoxin family protein                       | Oceanobolus indolifex HEL-45           | FSLPGAFTPTCSTYQLPCLSVNVMNAWKEWQGGSEFGARSWRY     |
| 32 | 0        | 119510642.ref | ZP_01629771.1  | membrane protein                                                  | Nodularia spumigena CCY9414            | FSLPGAFTPTCSTSHLPCVSNVMVFQWKGQDGNNGEFGKRSWRY    |
|    |          | 119464693.gb  | EAW45601.1     | membrane protein                                                  | Nodularia spumigena CCY9414            | FSLPGAFTPTCSTSHLPCVSNVMVFQWKGQDGNNGEFGKRSWRY    |
| 33 | 2.08E-12 | 116503658.gb  | EAU08553.1     | hypothetical protein CC1G_07749                                   | Coprinopsis cinerea okayama7#130       | ELSTNVVPGAFTPTCHTNHLPVMSGWGRFELGIRTARYGPGV      |
| 34 | 1.54E-21 | 83032914.ref  | XP_729247.1    | hypothetical protein PY01475                                      | Plasmodium yoelii str. 17XNL           | DTHEISLPGAFTPLCTSKMIPCTNNVLKSWFKSMGMMPWRY       |
|    |          | 23486502.gb   | EAA20812.1     | hypothetical protein                                              | Plasmodium yoelii str. 17XNL           | DTHEISLPGAFTPLCTSKMIPCTNNVLKSWFKSMGMMPWRY       |
| 35 | 0        | 163857979.ref | YP_001632277.1 | putative AhpC/TSA family protein                                  | Bordetella petrii                      | GTLTFAVPGAFTPTCSAKHLPCVSNVMGAWREGMGVRSQRY       |
|    |          | 163261707.emb | CAP44009.1     | putative AhpC/TSA family protein                                  | Bordetella petrii                      | GTLTFAVPGAFTPTCSAKHLPCVSNVMGAWREGMGVRSQRY       |
| 36 | 5.13E-17 | 163736341.ref | ZP_02143760.1  | peroxidoredoxin/glutaredoxin family protein                       | Phaeobacter gallaeciensis BS107        | FSLPGAFTPTCSTYQLPCLAVNVMNAWAAEESQGGSEFGKRSWRY   |
|    |          | 161390211.gb  | EDQ14561.1     | peroxidoredoxin/glutaredoxin family protein                       | Phaeobacter gallaeciensis BS107        | FSLPGAFTPTCSTYQLPCLAVNVMNAWAAEESQGGSEFGKRSWRY   |
| 37 | 4.28E-22 | 121603130.ref | YP_980459.1    | Redoxin domain protein                                            | Polaromonas naphthalenivorans CJ2      | FAVPGAFTPTCSAKHVPCLSVNVMGAWARDQLGLRSNRYGPGK     |
|    |          | 120592099.gb  | ABM35538.1     | Redoxin domain protein                                            | Polaromonas naphthalenivorans CJ2      | FAVPGAFTPTCSAKHVPCLSVNVMGAWARDQLGLRSNRYGPGK     |
| 39 | 0        | 121998468.ref | YP_001003255.1 | Glutaredoxin-family domain protein                                | Halorhodospira halophila SL1           | FALPGAFTPTCSSTHLPCVSNVMEEVRRRDRDQDGNNGEFGKRSWRY |
|    |          | 121589873.gb  | ABM62453.1     | Glutaredoxin-family domain protein                                | Halorhodospira halophila SL1           | FALPGAFTPTCSSTHLPCVSNVMEEVRRRDRDQDGNNGEFGKRSWRY |
| 40 | 9.83E-19 | 90420107.ref  | ZP_01228015.1  | peroxidoredoxin, ahpC/TSA family                                  | Aurantimonas sp. S185-9A1              | FAVPGAFTPTCSNMHLPPVAVNVMGAWKANGNGELGKRSKRY      |
|    |          | 90335644.gb   | EAS49191.1     | peroxidoredoxin, ahpC/TSA family                                  | Aurantimonas sp. S185-9A1              | FAVPGAFTPTCSNMHLPPVAVNVMGAWKANGNGELGKRSKRY      |
| 41 | 0        | 148653170.ref | YP_001280263.1 | Redoxin domain protein                                            | Psychrobacter sp. PRwf-1               | FSLPGAFTPTCSTSHLPEFKALGVDECVSVNNGNVEFGMRSWRY    |
|    |          | 148572254.gb  | ABQ84313.1     | Redoxin domain protein                                            | Psychrobacter sp. PRwf-1               | FSLPGAFTPTCSTSHLPEFKALGVDECVSVNNGNVEFGMRSWRY    |
| 42 | 2.38E-15 | 885714342.ref | ZP_01045330.1  | alkyl hydroperoxide reductase/ Thiol specific antioxidant/ M      | Nitrobacter sp. Nb-311A                | FAVPGAFTGCHKQHLDPKGVIVSNVNLNAWKRDLTGIRSKRY      |
|    |          | 85698789.gb   | EAG36658.1     | alkyl hydroperoxide reductase/ Thiol specific antioxidant/ M      | Nitrobacter sp. Nb-311A                | FAVPGAFTGCHKQHLDPKGVIVSNVNLNAWKRDLTGIRSKRY      |
| 43 | 6.87E-10 | 47756654.emb  | CAG30523.1     | mitochondrial peroxidoredoxin                                     | Pisum sativum                          | DEGVFLPGAFTGCVSSKHVPCVAVNTVNAWAEKILGIRSERW      |
| 44 | 4.02E-19 | 91224060.ref  | ZP_01259323.1  | putative antioxidant                                              | Vibrio alginolyticus 12G01             | FAVPGAFTPTCSEAHLPVCSVSNVMQAWGEAQTGGGGIRSQRY     |
|    |          | 91190971.gb   | EAS77237.1     | putative antioxidant                                              | Vibrio alginolyticus 12G01             | FAVPGAFTPTCSEAHLPVCSVSNVMQAWGEAQTGGGGIRSQRY     |

|    |          |           |     |                |                                                              |                                      |                                               |
|----|----------|-----------|-----|----------------|--------------------------------------------------------------|--------------------------------------|-----------------------------------------------|
| 45 | 0        | 59801322  | ref | YP_208034.1    | putative peroxidexin family protein/glutaredoxin             | Neisseria gonorrhoeae FA 1090        | FSLPGAFTPTCSSHLPCVSVNVMNAWAAEEGNEGFGRSWRY     |
|    |          | 59718217  | gb  | AAW89622.1     | putative peroxidexin family protein/glutaredoxin             | Neisseria gonorrhoeae FA 1090        | KLGEFGLPGAFTGCTTAHVPCVSVNVMGAWGASTLIARSKRY    |
| 46 | 3.19E-18 | 84686320  | ref | ZP_01013218.1  | AhpC/TSA family protein                                      | Rhodobacterales bacterium HTCC2654   |                                               |
|    |          | 84686477  | gb  | EAQ12949.1     | AhpC/TSA family protein                                      | Rhodobacterales bacterium HTCC2654   |                                               |
| 47 | 3.98E-20 | 53720629  | ref | YP_109615.1    | putative redoxin                                             | Burkholderia pseudomallei K96243     | GPNAFGLPGAFTPTCSAQHVPCVAVNVMGAWGRDLMGIRSSRY   |
|    |          | 99912740  | ref | ZP_01319438.1  | hypothetical protein Bpse1_03001003                          | Burkholderia pseudomallei 1655       |                                               |
|    |          | 100062405 | ref | ZP_01324078.1  | hypothetical protein BpseP_03002169                          | Burkholderia pseudomallei Pasteur    |                                               |
|    |          | 100124646 | ref | ZP_01330132.1  | hypothetical protein BpseS_03001844                          | Burkholderia pseudomallei S13        |                                               |
|    |          | 100236850 | ref | ZP_01336544.1  | hypothetical protein Bpse4_03001026                          | Burkholderia pseudomallei 406e       |                                               |
|    |          | 126440786 | ref | YP_001060529.1 | antioxidant, AhpC/TSA family                                 | Burkholderia pseudomallei 668        |                                               |
|    |          | 16454386  | ref | YP_001067780.1 | antioxidant, AhpC/TSA family                                 | Burkholderia pseudomallei 1106a      |                                               |
|    |          | 134280543 | ref | ZP_01767254.1  | antioxidant, AhpC/TSA family                                 | Burkholderia pseudomallei 305        |                                               |
|    |          | 161360567 | ref | ZP_02106429.1  | AhpC/TSA family protein                                      | Burkholderia pseudomallei 1106b      |                                               |
|    |          | 161373383 | ref | ZP_02112938.1  | AhpC/TSA family protein                                      | Burkholderia pseudomallei 1710a      |                                               |
|    |          | 52211043  | emb | CAH37031.1     | putative redoxin                                             | Burkholderia pseudomallei K96243     |                                               |
|    |          | 126220279 | gb  | ABN83785.1     | antioxidant, AhpC/TSA family                                 | Burkholderia pseudomallei 668        |                                               |
|    |          | 126228028 | gb  | ABN91568.1     | antioxidant, AhpC/TSA family                                 | Burkholderia pseudomallei 1106a      |                                               |
|    |          | 134248550 | gb  | EBA48633.1     | antioxidant, AhpC/TSA family                                 | Burkholderia pseudomallei 305        |                                               |
|    |          | 157808757 | gb  | EDO85927.1     | antioxidant, AhpC/TSA family                                 | Burkholderia pseudomallei 406e       |                                               |
|    |          | 157936860 | gb  | EDO94350.1     | antioxidant, AhpC/TSA family                                 | Burkholderia pseudomallei Pasteur    |                                               |
| 48 | 4.49E-20 | 13476239  | ref | NP_107809.1    | peroxidexin-like protein                                     | Mesorhizobium loti MAFF303099        | FGVPGAFTPTCSNNHLPVSVNVMGAWARFTMGLRSKRFKPGV    |
|    |          | 14027000  | dbj | BAB53954.1     | peroxidexin-like protein                                     | Mesorhizobium loti MAFF303099        |                                               |
| 49 | 1.20E-18 | 126355136 | ref | ZP_01712142.1  | Redoxin domain protein                                       | Pseudomonas putida GB-1              | FALPGAFTPTCSERHVPVSVNVMNAWGNLSLNGEMGRRSQRY    |
|    |          | 126319646 | gb  | EAZ70498.1     | Redoxin domain protein                                       | Pseudomonas putida GB-1              |                                               |
| 50 | 5.21E-20 | 88705528  | ref | ZP_01103238.1  | AhpC/TSA family protein                                      | gamma proteobacterium KT 71          | FAVPGAFTPGCSMTHLPCLSVNVMDAWGAKMGLRSORYGAGV    |
|    |          | 88700041  | gb  | EAQ97150.1     | AhpC/TSA family protein                                      | Congregibacter litoralis K171        |                                               |
| 51 | 0        | 20139171  | gb  | QGGLW7         | PRDX5_CERAE Peroxiredoxin-5, mitochondrial precursor (F      | Cercopithecus aethiops               | FGVPGAFTPGCSKTHLPCLSVNVTVGEWGRAHGNRRLLKRFGTGL |
|    |          | 10305338  | gb  | AAG13453.2     | AF110736_1, peroxidexin 5                                    | Cercopithecus aethiops               |                                               |
| 52 | 6.08E-12 | 115398884 | ref | XP_001212447.1 | conserved hypothetical protein                               | Aspergillus terreus NIH2624          | TTGLVLENIQVPAAFSPACSSHTVPVTKAWASSLGNRSKRY     |
|    |          | 114194843 | gb  | EAU36543.1     | conserved hypothetical protein                               | Aspergillus terreus NIH2624          |                                               |
| 53 | 0        | 113954203 | ref | YP_729907.1    | peroxidexin 2 family protein                                 | Synechococcus sp. CC9311             | FSLPGAFTPTCSSNHLPCLSVNVVMFQWKGKHNGEFGMRSWRY   |
|    |          | 113881554 | gb  | ABI46512.1     | peroxidexin 2 family protein                                 | Synechococcus sp. CC9311             |                                               |
| 54 | 5.44E-20 | 15641362  | ref | NP_230994.1    | antioxidant, putative                                        | Vibrio cholerae O1 biovar eltor str. | FAVPGAFTPTCSEAHLPVSVNVMKAWGEAQDTGNGGVRSQRY    |
|    |          | 116188557 | ref | ZP_01478328.1  | hypothetical protein VchoM_02002508                          | Vibrio cholerae MO10                 |                                               |
|    |          | 116221105 | ref | ZP_01486519.1  | hypothetical protein VchoV5_02000836                         | Vibrio cholerae V51                  |                                               |
|    |          | 153213487 | ref | ZP_01948798.1  | antioxidant, putative                                        | Vibrio cholerae 1587                 |                                               |
|    |          | 9655843   | gb  | AAF94508.1     | antioxidant, putative                                        | Vibrio cholerae O1 biovar eltor str. |                                               |
|    |          | 124115951 | gb  | EAY34771.1     | antioxidant, putative                                        | Vibrio cholerae 1587                 |                                               |
| 55 | 4.31E-18 | 28901148  | ref | NP_800803.1    | putative antioxidant                                         | Vibrio parahaemolyticus RIMD         | FAVPGAFTPTCSEAHLPVAVNVMNAWGEAQDTGGGGVRSQRY    |
|    |          | 28809661  | dbj | BAC62636.1     | putative antioxidant                                         | Vibrio parahaemolyticus RIMD         |                                               |
| 56 | 0        | 121604698 | ref | YP_982027.1    | Glutaredoxin-family domain protein                           | Polaromonas naphthalenivorans CJ2    | FSLPGAFTPTCSSHLPCISVNVNMEWGQAQNGNEFGKRSWRY    |
|    |          | 120593667 | gb  | ABM37106.1     | Glutaredoxin-family domain protein                           | Polaromonas naphthalenivorans CJ2    |                                               |
| 57 | 0        | 119181446 | ref | XP_001241932.1 | hypothetical protein CIMG_05828                              | Coccidioides immitis RS              | FSLPGAFTPTCSASHLPVAVL VMSAWGKANVTGDAGERTGRY   |
|    |          | 90300718  | gb  | EAS30349.1     | hypothetical protein CIMG_05828                              | Coccidioides immitis RS              |                                               |
| 58 | 0        | 32034501  | ref | ZP_00134673.1  | COG0678; Peroxiredoxin                                       | Actinobacillus pleuropneumoniae      | FSLPGAFTPTCSSHLPCMSVNVNMAWKAAGNGNEFGKRSWRY    |
| 59 | 0        | 66773128  | ref | NP_001019577.1 | hypothetical protein LOC554105                               | Danio rerio                          | FGVPGAFTPGCSKTHLPCISVNVMSAWGKGNLRSQRYGTGL     |
|    |          | 63102025  | gb  | AAH95756.1     | Zgc_112318                                                   | Danio rerio                          |                                               |
| 60 | 8.84E-17 | 117620462 | ref | YP_855809.1    | peroxidexin                                                  | Aeromonas hydrophila subsp.          | FAVPGAFTPTCSNAHLPCLSVNVNMAWQDAQETGAGGVRAQRF   |
|    |          | 117561869 | gb  | ABK38817.1     | peroxidexin                                                  | Aeromonas hydrophila subsp.          |                                               |
| 61 | 1.50E-21 | 78065127  | ref | YP_367896.1    | Alkyl hydroperoxide reductase/ Thiol specific antioxidant/ M | Burkholderia sp. 383                 | FGLPGAFTPTCSAQHVPCVSVNVMGAWGRDLMGIRSLRYDGGV   |
|    |          | 77965872  | gb  | ABB07252.1     | Alkyl hydroperoxide reductase/ Thiol specific antioxidant/ M | Burkholderia sp. 383                 |                                               |
| 62 | 0        | 119469938 | ref | ZP_01612743.1  | putative peroxidexin/glutaredoxin family protein             | Alteromonadales bacterium TW-7       | FSLPGAFTPTCSSHLPCLSVNVNMAWAEHQNGNEFGKRSWRY    |
|    |          | 119446648 | gb  | EAW27921.1     | putative peroxidexin/glutaredoxin family protein             | Alteromonadales bacterium TW-7       |                                               |
| 63 | 0        | 115681541 | ref | XP_796387.2    | PREDICTED: similar to peroxidexin V protein                  | Strongylocentrotus purpuratus        | KTGVFAVPGAFTPGCSKTHLPDFDLKAKCVAVNVMMAWGAH     |
|    |          | 115931401 | ref | XP_001183945.1 | PREDICTED: similar to peroxidexin V protein                  | Strongylocentrotus purpuratus        |                                               |
| 64 | 1.26E-16 | 84686939  | ref | ZP_01014823.1  | peroxidexin/glutaredoxin family protein                      | Rhodobacterales bacterium HTCC2654   | FSLPGAFTPTCSTYQLPCMSVNVNMAWQDAQGSSEFGARSWRY   |
|    |          | 84665136  | gb  | EAQ11616.1     | peroxidexin/glutaredoxin family protein                      | Rhodobacterales bacterium HTCC2654   |                                               |
| 65 | 9.28E-15 | 70392559  | ref | XP_751128.1    | AhpC/TSA family protein                                      | Aspergillus fumigatus Af293          | GKGIIGVPAAFSPACSSHPVSVNVMKAWGVSLGNORSKRY      |

|    |          |               |                |                                                               |                                     |                                               |
|----|----------|---------------|----------------|---------------------------------------------------------------|-------------------------------------|-----------------------------------------------|
| 66 | 3.49E-21 | 6684876.1 gb  | EAL89090.1     | AhpC/TSA family protein                                       | Aspergillus fumigatus Af293         | FSLPGAFTPTCSNFQLPCLSVNVMNAWGKKQFGMRSWRYDPYE   |
|    |          | 121602101 ref | YP_989434.1    | putative peroxidoxin                                          | Bartonella bacilliformis KC583      |                                               |
|    |          | 120614278 gb  | ABM44879.1     | putative peroxidoxin                                          | Bartonella bacilliformis KC583      |                                               |
| 67 | 0        | 46156414 ref  | YP_00132875.2  | COG0678: Peroxidoxin                                          | Haemophilus somnus 2336             | FSLPGAFTPTCSATHLPCVSNVMNAWKADQNGNGEFGKRSWRY   |
| 68 | 0        | 113474068 ref | YP_720129.1    | Redoxin                                                       | Trichodesmium erythraeum IMS101     | FALPGAFTPTCSSTHLPCVSNVMFQWKGKQNGNGEFGMRSWRY   |
|    |          | 110165116 gb  | ABG49656.1     | Redoxin                                                       | Trichodesmium erythraeum IMS101     |                                               |
| 69 | 0        | 118484088 gb  | ABK93929.1     | unknown                                                       | Populus trichocarpa                 | FGVPGAFTPTCSLKHVPCISVNMKAWAKTYLGLTRSRFRGGGE   |
| 70 | 1.35E-15 | 119878173 ref | XP_01645130.1  | Redoxin                                                       | Stenotrophomonas maltophilia R551-3 | GPLFAVPGAFTPTCSARHLPCVAVNVMKAWAQQMGIKRSRFR    |
|    |          | 119819294 gb  | EAX21938.1     | Redoxin                                                       | Stenotrophomonas maltophilia R551-3 |                                               |
| 71 | 2.99E-10 | 3914387 sp    | P56578         | MAF3_MALFU Putative peroxidoxin (Thioredoxin reduced)         | Malassezia furfur                   | VAVPGAFTPTCTANHVPIVANVLSAWGITEMLGLRTARYDEGE   |
|    |          | 3445492 dbj   | BAA32436.1     | MF2                                                           | Malassezia furfur                   |                                               |
| 72 | 0        | 158302218 ref | XP_001238545.2 | AGAP001325-PA                                                 | Anopheles gambiae str. PEST         | FAVPGAFTPGCSKTHLPCVSNVMSAWGKQHGGLRSKRYGTGL    |
|    |          | 157012845 gb  | EAU75715.2     | AGAP001325-PA                                                 | Anopheles gambiae str. PEST         |                                               |
| 73 | 1.59E-16 | 114762729 ref | YP_01442163.1  | antioxidant, AhpC/Tsa family protein                          | Roseovanius sp. HCC2601             | FALPGAFTPTCSTYQLPCLSVNFGARSWRYVIAEWFEEPPDYG   |
|    |          | 114544639 gb  | EAU147645.1    | antioxidant, AhpC/Tsa family protein                          | Roseovanius sp. HCC2601             |                                               |
| 74 | 6.13E-18 | 4704732 gb    | AAD28243.1     | AF121356_1 peroxidoxin TPx2                                   | Arabidopsis thaliana                | FGVPGAFTPTCSMSHVCFVSNVMKAWGKTYGSGESGSSGRF     |
| 75 | 3.76E-22 | 164562985 ref | YP_02208802.1  | Redoxin domain protein                                        | Polynucleobacter necessarius STIR1  | GNPAFALPGAFTPTCSAKHVPVSNVVMGAWGRDQLGVRSDRY    |
|    |          | 164505711 gb  | EDQ93912.1     | Redoxin domain protein                                        | Polynucleobacter necessarius STIR1  |                                               |
| 76 | 4.75E-19 | 154720991 gb  | ABS84672.1     | AhpC/TSA-family protein                                       | Tetrahobacter kashmirensis          | FAVPGAFTPTCTTKHVVCVAVNVMGAWGRDITLGVRSRRYEJGGE |
| 77 | 0        | 93006717 ref  | YP_581154.1    | alkyl hydroperoxide reductase/ Thiol specific antioxidant/ MA | Psychrobacter cryohalolentis K5     | FSLPGAFTPTCSTSHLPEFKALGIDECISVNGNGEFGMRSWRY   |
|    |          | 92394395 gb   | ABE75670.1     | alkyl hydroperoxide reductase/ Thiol specific antioxidant/ MA | Psychrobacter cryohalolentis K5     |                                               |
| 78 | 0        | 78364922 gb   | ABB42828.1     | peroxisomal matrix protein                                    | Coccidioides posadasii              | FSLPGAFTPTCSASHLPVAVLVMSAWGKANVTGDAGERTGRY    |
| 79 | 0        | 153302024 ref | YP_01982871.1  | peroxidoxin family protein/glutaredoxin                       | Vibrio cholerae 623-39              | FSLPGAFTPTCSSTHLPCVSNVMAWKDDQNGNGEFGKRSWRY    |
|    |          | 148874307 gb  | EDL72442.1     | peroxidoxin family protein/glutaredoxin                       | Vibrio cholerae 623-39              |                                               |
| 80 | 0        | 15603212 ref  | NP_246286.1    | hypothetical protein PM1347                                   | Pasteurella multocida subsp.        | FSLPGAFTPTCSSTHLPCMSVNMNAWKADQNGNGEFGKRSWRY   |
|    |          | 12721717 gb   | AAK03431.1     | unknown                                                       | Pasteurella multocida subsp.        |                                               |
| 81 | 1.16E-20 | 17547557 ref  | NP_520989.1    | PROBABLE TYPE 2 PEROXIREDOXIN PROTEIN                         | Ralstonia solanacearum GM1000       | GNPAFALPGAFTPTCSARHVPVSNVVMGAWARAQMGVRSQRY    |
|    |          | 17429861 emb  | CAD16545.1     | putative thioredoxin fold-harboring protein                   | Ralstonia solanacearum              |                                               |
| 82 | 0        | 33593679 ref  | NP_881323.1    | AhpC/TSA-family protein                                       | Bordetella pertussis Tohama I       | GTLTFAVPGAFTPTCSAKHLPVAVNVMGAWGREGMIGVRSQRY   |
|    |          | 33563752 emb  | CAE42992.1     | AhpC/TSA-family protein                                       | Bordetella pertussis Tohama I       |                                               |
| 83 | 1.05E-15 | 27376428 ref  | NP_767957.1    | peroxidoxin                                                   | Bradyrhizobium japonicum USDA 110   | GPQVFAVPGAFTGTCHEKMLHLPIISVNVNNAWKRDITLGRSKRY |
|    |          | 27349568 dbj  | BAC46582.1     | peroxidoxin                                                   | Bradyrhizobium japonicum USDA 110   |                                               |
| 84 | 3.10E-19 | 116483155 ref | YP_01473217.1  | hypothetical protein VE-x2w_02004238                          | Vibrio sp. Ex25                     | FAVPGAFTPTCSEAHLPVSNVVMQAWGEAQDTGGGGIRSQRY    |
|    |          | 151939892 gb  | EDN58719.1     | Peroxiredoxin                                                 | Vibrio sp. Ex25                     |                                               |
| 85 | 3.87E-20 | 27367181 ref  | NP_762708.1    | Peroxiredoxin                                                 | Vibrio vulnificus CMCP6             | FAVPGAFTPTCSEAHLPVSNVVMKAWGEAQDTAGGGLRSQRY    |
|    |          | 37676896 ref  | NP_937292.1    | peroxidoxin                                                   | Vibrio vulnificus YJ016             |                                               |
|    |          | 27358749 gb   | AAQ07698.1     | AE016810_201 Peroxiredoxin                                    | Vibrio vulnificus CMCP6             |                                               |
|    |          | 37201440 dbj  | BAC97262.1     | peroxidoxin                                                   | Vibrio vulnificus YJ016             |                                               |
| 86 | 2.43E-12 | 116498761 gb  | EAU81656.1     | predicted protein                                             | Coprinopsis cinerea okayama7#130    | SPGEIGLPGAFTTPCNGHVPVAVIANNVTKAWKEALGGPRSKRF  |
| 87 | 4.48E-14 | 163740446 ref | YP_02147840.1  | AhpC/TSA family protein                                       | Phaeobacter gallaeciensis 2.10      | SVGEFAVPGAFTPTCHSAHVPCVAVNVMKAWSEATLIGRSLRY   |
|    |          | 161386304 gb  | EDQ10679.1     | AhpC/TSA family protein                                       | Phaeobacter gallaeciensis 2.10      |                                               |
| 88 | 0        | 29726703 pdb  | 1NM3           | A Chain A. Crystal Structure Of Haemophilus influenzae Hybrid | Haemophilus influenzae              | FSLPGAFTPTCSSSLLPWSVNFVNAWKEDENGNGEFGKRSWRY   |
|    |          | 29726704 pdb  | 1NM3           | B Chain B. Crystal Structure Of Haemophilus influenzae Hybrid | Haemophilus influenzae              |                                               |
|    |          |               |                |                                                               |                                     |                                               |
| 89 | 0        | 153802986 ref | YP_01957572.1  | peroxidoxin family protein/glutaredoxin                       | Vibrio cholerae MZO-3               | FSLPGAFTPTCSSTHLPCVSNVNMNAWKDDQNGNGEFGKRSWRY  |
|    |          | 124121470 gb  | EAY40213.1     | peroxidoxin family protein/glutaredoxin                       | Vibrio cholerae MZO-3               |                                               |
| 90 | 8.86E-13 | 116792304 gb  | ABK26311.1     | unknown                                                       | Picea sitchensis                    | DEGVFGLPGAFTVCSAQHVPCVSNVVMNAWKAEKLLGHRSGRW   |
| 91 | 1.22E-12 | 119467218 ref | XP_001257415.1 | allergen Asp F3                                               | Neosartorya fischeri NRRL 181       | DKGEFALPGAFTVCSARHVPVAVLVMSAWGKANEEGRTKRY     |
|    |          | 119405567 gb  | EAW15518.1     | allergen Asp F3                                               | Neosartorya fischeri NRRL 181       |                                               |
| 92 | 2.89E-16 | 90416592 ref  | YP_01224523.1  | antioxidant, AhpC/Tsa family protein                          | marine gamma proteobacterium        | FAVPGAFTPTCSAAHLPCMSVNMVHAWGOSAMGTRSQRFDAGA   |
|    |          | 90331791 gb   | EAS47019.1     | antioxidant, AhpC/Tsa family protein                          | marine gamma proteobacterium        |                                               |
| 93 | 0        | 110835493 ref | YP_694352.1    | peroxidoxin family protein/glutaredoxin, putative             | Alcanivorax borkumensis SK2         | FALPGAFTPTCSSTHLPCVSNVVMNAWGDQNGNGEFGPRSWRY   |
|    |          | 110648604 emb | CAL18080.1     | peroxidoxin family protein/glutaredoxin, putative             | Alcanivorax borkumensis SK2         |                                               |
| 94 | 0        | 152978074 ref | YP_001343703.1 | glutaredoxin-family domain protein                            | Actinobacillus succinogenes 130Z    | FSLPGAFTPTCSSTHLPCMSVNMNAWKADQNGNGEFGKRSWRY   |
|    |          | 150839797 gb  | ABR73768.1     | glutaredoxin-family domain protein                            | Actinobacillus succinogenes 130Z    |                                               |
| 95 | 9.67E-16 | 86137169 ref  | YP_01055747.1  | AhpC/TSA family protein                                       | Roseobacter sp. MED193              | STGEFAVPGAFTPTCHSAHVPCVSNVVMQAWGEATLIGRSLRY   |
|    |          | 85628493 gb   | EAC046690.1    | AhpC/TSA family protein                                       | Roseobacter sp. MED193              |                                               |
| 96 | 2.81E-12 | 67526459 ref  | XP_661291.1    | hypothetical protein AN3687.2                                 | Aspergillus nidulans FGSC A4        | GKGVIGVPAAFSPACSSTHVPVAVNVTKAWGTTLGNQSKRY     |

|     |          |               |                |                                                              |                                           |                                                 |
|-----|----------|---------------|----------------|--------------------------------------------------------------|-------------------------------------------|-------------------------------------------------|
| 97  | 1.08E-18 | 40740705.gb   | EA459895.1     | hypothetical protein AN3687.2                                | Aspergillus nidulans FGSC A4              | FAVPGAFPTCSLNHLPLVAVNVMGAWAQSTGEGKLGVRSKRY      |
|     |          | 23501379.ref  | NP_697506.1    | ahpC/TSA family protein                                      | Bruceella suis 1330                       |                                                 |
|     |          | 82699385.ref  | YP_413959.1    | Alkyl hydroperoxide reductase/ Thiol specific antioxidant/ M | Bruceella melitensis biovar. Abortus 2308 |                                                 |
|     |          | 161618449.ref | YP_001592336.1 | Redoxin domain protein                                       | Bruceella canis ATCC 23365                |                                                 |
|     |          | 163842759.ref | YP_001627163.1 | thiol peroxidase                                             | Bruceella suis ATCC 23445                 |                                                 |
|     |          | 23347274.gb   | AAN29421.1     | ahpC/TSA family protein                                      | Bruceella suis 1330                       |                                                 |
|     |          | 826165486.emb | CAJ10460.1     | Alkyl hydroperoxide reductase/ Thiol specific antioxidant/ M | Bruceella melitensis biovar. Abortus 2308 |                                                 |
|     |          | 161335260.gb  | ABX61565.1     | Redoxin domain protein                                       | Bruceella canis ATCC 23365                |                                                 |
|     |          | 163673482.gb  | ABY37593.1     | thiol peroxidase                                             | Bruceella suis ATCC 23445                 |                                                 |
| 98  | 0        | 157115218.ref | XP_001658149.1 | peroxidoredoxin 5, prdx5                                     | Aedes aegypti                             | FAVPGAFPTGCSKTHLPCVSNVMSAWGKQHGGLRSKRYGTGL      |
|     |          | 108876980.gb  | EAT41205.1     | peroxidoredoxin 5, prdx5                                     | Aedes aegypti                             |                                                 |
| 99  | 4.28E-20 | 86356614.ref  | YP_468506.1    | probable peroxidoredoxin protein                             | Rhizobium etli CFN 42                     | GPVEFAVPGAFPTCSLNHLPLVAVNVMGAWAQSSLGLRSKRY      |
|     |          | 86280716.gb   | ABC89779.1     | probable peroxidoredoxin protein                             | Rhizobium etli CFN 42                     |                                                 |
| 100 | 1.09E-14 | 91978488.ref  | YP_571147.1    | peroxidoredoxin-like protein                                 | Rhodopseudomonas palustris BisB5          | DGVEFAVPGAYTGTCHKMHVPIVSNVNMNAWKRDLTGLTRSLRY    |
|     |          | 91684944.gb   | ABE41246.1     | peroxidoredoxin-like protein                                 | Rhodopseudomonas palustris BisB5          |                                                 |
| 101 | 0        | 114051191.ref | NP_001040386.1 | peroxidoredoxin                                              | Bombyx mori                               | FAVPGAFPTGCSKTHLPCVSNVMAAWGAHQHGGFRSKRFGTGL     |
|     |          | 95102710.gb   | ABF51296.1     | peroxidoredoxin                                              | Bombyx mori                               |                                                 |
| 102 | 1.49E-17 | 86138369.ref  | EP_01056943.1  | peroxidoredoxin/glutaredoxin family protein                  | Roseobacter sp. MED193                    | FSLPGAFPTCSTYQLPCMSVNVNKNKWAESQSGSEFGARSWRY     |
|     |          | 85824894.gb   | EA045095.1     | peroxidoredoxin/glutaredoxin family protein                  | Roseobacter sp. MED193                    |                                                 |
| 103 | 1.97E-10 | 146413901.ref | XP_001482921.1 | hypothetical protein PGUG_04876                              | Pichia guilliermondii ATCC 6260           | VAVPGAFPTCTENHIPVLNAWAKLLDGGADLSVDE/DRSVRY      |
|     |          | 146392620.gb  | EDK40778.1     | hypothetical protein PGUG_04876                              | Pichia guilliermondii ATCC 6260           |                                                 |
| 104 | 0        | 88794415.ref  | DPK_01110123.1 | putative peroxidoredoxin/glutaredoxin family protein         | Altomonas macleodii 'Deep ecotype'        | FSLPGAFPTCSSTHLPCMSVNVNMAWAADGNGEFGKRSWRY       |
|     |          | 88774181.gb   | EAR05438.1     | putative peroxidoredoxin/glutaredoxin family protein         | Altomonas macleodii 'Deep ecotype'        |                                                 |
| 105 | 0        | 146345491.sp  | Q9BG11         | PRDX5_BOVIN Peroxidoredoxin-5, mitochondrial precursor (P    | Bos taurus                                | FGLPGAFPTGCSKTHLPLTVNVTEEWARAHGNHRLKRFGTGL      |
|     |          |               |                |                                                              |                                           |                                                 |
| 106 | 9.80E-22 | 114328542.ref | YP_745699.1    | peroxidoredoxin                                              | Granulibacter thebesdensis CGDNIH1        | GPKEFAVPGAFPTCSAKHLPCLSVNVMGAWAKEQLGVRSQRF      |
|     |          | 114316716.gb  | ABI62776.1     | peroxidoredoxin                                              | Granulibacter thebesdensis CGDNIH1        |                                                 |
| 107 | 1.12E-17 | 124268617.ref | YP_001022621.1 | AhpC/TSA-family protein                                      | Methylobium petroleiphilum PM1            | VEGEFALPGAFPTCSAQHVPCLSVNVMGAWGREQMGRLRSQRY     |
|     |          | 124261392.gb  | ABM96386.1     | AhpC/TSA-family protein                                      | Methylobium petroleiphilum PM1            |                                                 |
| 108 | 2.32E-22 | 70953094.ref  | XP_7456670.1   | antioxidant protein                                          | Plasmodium chabaudi                       | DTHIEISLP/GAF/TPLCTSKMIPG/ITNNVLKSWFKDMMGMRPWRY |
|     |          | 56826067.emb  | CAH77947.1     | antioxidant protein, putative                                | Plasmodium chabaudi                       |                                                 |
| 109 | 0        | 77976811.ref  | ZP_00832281.1  | COG0678; Peroxidoredoxin                                     | Yersinia intermedia ATCC 29909            | FSLPGAFPTCSSSHLPCVSNVNMNAWKADGNGEFGPRSWRY       |
| 110 | 0        | 113869220.ref | YP_727709.1    | Peroxidoredoxin                                              | Ralstonia eutropha H16                    | FGLPGAFPTCSAKHVPCLSVNVMGAWGREQMGVRSKRYAFGE      |
|     |          | 113297996.emb | CAJ94341.1     | Peroxidoredoxin                                              | Ralstonia eutropha H16                    |                                                 |
| 111 | 0        | 113460184.ref | YP_718241.1    | peroxidoredoxin                                              | Haemophilus somnus 129PT                  | FSLPGAFPTCSATHLPCVSNVNMNAWKADGNGEFGKRSWRY       |
|     |          | AB124316.1    | AB124316.1     | peroxidoredoxin                                              | Haemophilus somnus 129PT                  |                                                 |
| 112 | 2.79E-18 | 92113257.ref  | YP_573185.1    | alkyl hydroperoxide reductase/ Thiol specific antioxidant/ M | Chromohalobacter salexigenis DSM          | DTGEFAVPGAFPTGCSNTHMPCLAVNVLGAWQQDQMGTRSQRY     |
|     |          | 91796347.gb   | ABE58486.1     | alkyl hydroperoxide reductase/ Thiol specific antioxidant/ M | Chromohalobacter salexigenis DSM          |                                                 |
| 113 | 1.96E-13 | 163698443.ref | ZP_02117306.1  | alkyl hydroperoxide reductase                                | Methylobacterium nodulans ORS 2060        | GPAAVAVPGAFPTCTHRNHLPLVTSVNVLDAWSKAALGVRSKRY    |
|     |          | 162435465.gb  | EDQ46046.1     | alkyl hydroperoxide reductase                                | Methylobacterium nodulans ORS 2060        |                                                 |
| 114 | 4.47E-10 | 125569838.gb  | EAZ11353.1     | hypothetical protein OsJ_0011178                             | Oryza sativa (japonica cultivar-group)    | YGGSAAAAFGLPGAYTGYCSQAHPVPCVSNLGRSRHRWVPGE      |
| 115 | 1.70E-12 | 115443134.ref | XP_001218374.1 | hypothetical protein ATEG_09752                              | Aspergillus terreus NH2624                | FSVPGAFPTCSVNHMPVAVVMSAWAKANNNGRTGRYGAVE        |
|     |          | 1141788243.gb | EAU29943.1     | hypothetical protein ATEG_09752                              | Aspergillus terreus NH2624                |                                                 |
| 116 | 0        | 28899527.ref  | NP_799132.1    | peroxidoredoxin family protein/glutaredoxin                  | Vibrio parahaemolyticus RIMD              | FSLPGAFPTCSSSHLPCVSNVNMNAWKHDQNGEFGKRSWRY       |
|     |          | 153839012.ref | ZP_01991679.1  | AhpC/TSA family/glutaredoxin domain protein                  | Vibrio parahaemolyticus AQ3810            |                                                 |
|     |          | 28807763.dbj  | BAC61016.1     | peroxidoredoxin family protein/glutaredoxin                  | Vibrio parahaemolyticus RIMD              |                                                 |
|     |          | 149747519.gb  | EDM58459.1     | AhpC/TSA family/glutaredoxin domain protein                  | Vibrio parahaemolyticus AQ3810            |                                                 |
| 117 | 9.88E-11 | 119388056.ref | YP_916112.1    | Redoxin domain protein                                       | Paracoccus denitrificans PD1222           | GPEEFAVPGAYTPTCTNAHMPCTVNVAGKWAADTVNGRSKRY      |
|     |          | 119374823.gb  | ABL70416.1     | thiol peroxidase (atypical 2-Cys peroxidoredoxin)            | Paracoccus denitrificans PD1222           |                                                 |
| 118 | 6.86E-20 | 116259810.ref | YP_766648.1    | putative thioredoxin family protein                          | Rhizobium leguminosarum bv. viciae        | GPVEFAVPGAFPTCSLNHLPLVAVNVMGAWAQSSLGLRSKRY      |
|     |          | 115256458.emb | CAK06534.1     | putative thioredoxin family protein                          | Rhizobium leguminosarum bv. viciae        |                                                 |
| 119 | 3.78E-19 | 149915469.ref | ZP_01903996.1  | antioxidant, AhpC/Tsa family, putative                       | Roseobacter sp. Azwk-3b                   | FAVPGAFPTCHSAHVPCLSVNMRWAGKDTLVARSKRYGTCE       |
|     |          | 149810758.gb  | EDM70599.1     | antioxidant, AhpC/Tsa family, putative                       | Roseobacter sp. Azwk-3b                   |                                                 |
| 120 | 1.44E-21 | 118714451.ref | ZP_01567005.1  | Redoxin                                                      | Burkholderia cenocepacia MC0-3            | FGLPGAFPTCSAQHVPCLSVNVMGAWGRDLMGIRSLRYDGGV      |
|     |          | 118648098.gb  | EAV54909.1     | Redoxin                                                      | Burkholderia cenocepacia MC0-3            |                                                 |
| 121 | 0        | 109109506.ref | XP_001114433.1 | PREDICTED: similar to Peroxidoredoxin-5, mitochondrial prec  | Macaca mulatta                            | FEGEFVPGAFPTGCSKTHLPGAEALAKACLNVNVTGEWGRAH      |
| 122 | 4.15E-18 | 61680402.pdb  | 1XIY           | A Chain A, Crystal Structure Of Plasmodium Falciparum Ant    | Plasmodium falciparum                     | DTHIEISLP/GAF/TPTSKMIPG/ITNNVLKSWFKMGMMPWRFF    |
|     |          | 61680403.pdb  | 1XIY           | B Chain B, Crystal Structure Of Plasmodium Falciparum Ant    | Plasmodium falciparum                     |                                                 |

|     |          |           |     |                |                                                                         |                                  |                                                |
|-----|----------|-----------|-----|----------------|-------------------------------------------------------------------------|----------------------------------|------------------------------------------------|
| 123 | 0        | 156972416 | ref | YP_001443323.1 | glutaredoxin                                                            | Vibrio harveyi ATCC BAA-1116     | FSLPGAFTPTCSSSHQPVCVSVNVMNAWKADQNGGFEFGKRSWRY  |
|     |          | 156524010 | gb  | ABU69096.1     | hypothetical protein VIBHAR_00036                                       | Vibrio harveyi ATCC BAA-1116     | FSLPGAFTPTCSSSHQPVCVSVNVMNAWKADQNGGFEFGKRSWRY  |
| 124 | 0        | 116095042 | ref | YP_840618.1    | Peroxiredoxin                                                           | Ralstonia eutropha H16           | FGLPGAFTPTCSSTHLPCVSVNVMNEWAKDQNGGFEFGKRSWRY   |
|     |          | 113529541 | emb | CAJ95888.1     | Peroxiredoxin                                                           | Ralstonia eutropha H16           | FGLPGAFTPTCSSTHLPCVSVNVMNEWAKDQNGGFEFGKRSWRY   |
| 125 | 3.18E-22 | 18408870  | ref | NP_564763.1    | peroxiredoxin type 2, putative                                          | Arabidopsis thaliana             | FGVPGAFTPTCSMSHVPCFSVNMKAWGKTYGSGGELGIRSRFF    |
|     |          | 84028276  | sp  | O22711         | PRX2D_ARATH Peroxiredoxin-2D (Peroxiredoxin IID) (Thiol unknown protein | Arabidopsis thaliana             | FGVPGAFTPTCSMSHVPCFSVNMKAWGKTYGSGGELGIRSRFF    |
|     |          | 51970548  | dbj | BAD43966.1     | unknown protein                                                         | Arabidopsis thaliana             | FGVPGAFTPTCSMSHVPCFSVNMKAWGKTYGSGGELGIRSRFF    |
| 126 | 0        | 94313811  | ref | YP_587020.1    | Glutaredoxin-like region                                                | Ralstonia metallidurans CH34     | FSLPGAFTPTCSSTHLPCVSVNVMNEWAKDQNGGFEFGKRSWRY   |
|     |          | 94317663  | gb  | ABF11751.1     | Glutaredoxin-like region                                                | Ralstonia metallidurans CH34     | FSLPGAFTPTCSSTHLPCVSVNVMNEWAKDQNGGFEFGKRSWRY   |
| 127 | 0        | 93312053  | ref | YP_585263.1    | peptidase S8 and S53, subtilisin, kexin, sedolisin                      | Ralstonia metallidurans CH34     | FGLPGAFTPTCSAKHVPCHSVNMGAWGREQQLGVRKRYEPGE     |
|     |          | 93355905  | gb  | ABF09994.1     | peptidase S8 and S53, subtilisin, kexin, sedolisin                      | Ralstonia metallidurans CH34     | FGLPGAFTPTCSAKHVPCHSVNMGAWGREQQLGVRKRYEPGE     |
| 128 | 0        | 67923152  | ref | ZP_00516641.1  | Alkyl hydroperoxide reductase/ Thiol specific antioxidant/ M            | Crocospaera watsonii WH 8501     | FSLPGAFTPTCSSNHLPCVSVNVMFQWKGKQKQNGGFEFGMRSWRY |
|     |          | 67854994  | gb  | EAM50264.1     | Alkyl hydroperoxide reductase/ Thiol specific antioxidant/ M            | Crocospaera watsonii WH 8501     | FSLPGAFTPTCSSNHLPCVSVNVMFQWKGKQKQNGGFEFGMRSWRY |
| 129 | 0        | 6746357   | gb  | AAF27532.1     | AF124994_1 peroxisomal membrane protein 20                              | Mus musculus                     | FGVPGAFTPGCSKTHLPCVSVNVMNEWAKDQNGGFEFGKRSWRY   |
|     |          | 10129957  | gb  | AAAG13450.1    | AF110733_1 peroxiredoxin 5                                              | Mus musculus                     | FGVPGAFTPGCSKTHLPCVSVNVMNEWAKDQNGGFEFGKRSWRY   |
|     |          | 12832325  | dbj | BAB22058.1     | unnamed protein product                                                 | Mus musculus                     | FGVPGAFTPGCSKTHLPCVSVNVMNEWAKDQNGGFEFGKRSWRY   |
|     |          | 12833934  | dbj | BAB22720.1     | unnamed protein product                                                 | Mus musculus                     | FGVPGAFTPGCSKTHLPCVSVNVMNEWAKDQNGGFEFGKRSWRY   |
| 130 | 0        | 90413602  | ref | ZP_01221592.1  | Putative peroxiredoxin/glutaredoxin family protein                      | Photobacterium profundum 3TCK    | FSLPGAFTPTCSSSHLPCVSVNVMNAWKADQNGGFEFGPRSWRY   |
|     |          | 90325375  | gb  | EAS41864.1     | Putative peroxiredoxin/glutaredoxin family protein                      | Photobacterium profundum 3TCK    | FSLPGAFTPTCSSSHLPCVSVNVMNAWKADQNGGFEFGPRSWRY   |
| 131 | 1.07E-09 | 7670411   | dbj | BAA95057.1     | Mus musculus peroxiredoxin V (PrxV)                                     | Mus musculus                     | VLGCKASSVLAGRAGRKIPSVFEGVPGAFTPGCGSKVRLLLGPGV  |
|     |          | 148701309 | gb  | EDL33256.1     | peroxiredoxin 5, isoform CRA_a                                          | Mus musculus                     | VLGCKASSVLAGRAGRKIPSVFEGVPGAFTPGCGSKVRLLLGPGV  |
| 132 | 0        | 149910252 | ref | ZP_01898897.1  | glutaredoxin                                                            | Montella sp. PE36                | FSLPGAFTPTCSSSHLPCVSVNVMNAWKDQNGGFEFGKRSWRY    |
|     |          | 149806721 | gb  | EDM66686.1     | glutaredoxin                                                            | Montella sp. PE36                | FSLPGAFTPTCSSSHLPCVSVNVMNAWKDQNGGFEFGKRSWRY    |
| 133 | 1.26E-15 | 83594387  | ref | YP_428139.1    | Alkyl hydroperoxide reductase/ Thiol specific antioxidant/ M            | Rhodospirillum rubrum ATCC 11170 | FAVPGAFTPTCSDSHVPCVAVNVLAAWSKALGTVELGKRFQRC    |
|     |          | 83571301  | gb  | ABC23852.1     | Alkyl hydroperoxide reductase/ Thiol specific antioxidant/ M            | Rhodospirillum rubrum ATCC 11170 | FAVPGAFTPTCSDSHVPCVAVNVLAAWSKALGTVELGKRFQRC    |
| 134 | 0        | 4928472   | gb  | AAD333602.1    | AF133302_1 type 2, peroxiredoxin                                        | Brassica rapa subsp. pekinensis  | FGVPGAFTPTCSMKHVPCFSVNMKAWGKTYGSGGELGVRSRFF    |
|     |          | 83032224  | gb  | ABB97029.1     | unknown                                                                 | Brassica rapa                    | FGVPGAFTPTCSMKHVPCFSVNMKAWGKTYGSGGELGVRSRFF    |
| 135 | 3.67E-16 | 114800089 | ref | YP_759774.1    | antioxidant, AhpC/TSA family                                            | Hyphomonas neptunium ATCC 15444  | FAVPGAFTPTCSARHLPCVSVNVMGAWGKSSGNGAMGKRSQRY    |
|     |          | 114740263 | gb  | ABI78388.1     | antioxidant, AhpC/TSA family                                            | Hyphomonas neptunium ATCC 15444  | FAVPGAFTPTCSARHLPCVSVNVMGAWGKSSGNGAMGKRSQRY    |
| 136 | 0        | 78484484  | ref | YP_390409.1    | Glutaredoxin-like region                                                | Thiomicrospira crunogena XCL-2   | FSLPGAFTPTCSSSHLPCVSVNVMNEWAKDQNGGFEFGKRSWRY   |
|     |          | 78362770  | gb  | ABB40735.1     | Glutaredoxin-like region                                                | Thiomicrospira crunogena XCL-2   | FSLPGAFTPTCSSSHLPCVSVNVMNEWAKDQNGGFEFGKRSWRY   |
| 137 | 2.75E-21 | 84360666  | ref | ZP_00985362.1  | COG0678: Peroxiredoxin                                                  | Burkholderia dolosa AUO158       | GFNAFGLPGAFTPTCSAQHVPCVSVNVMGAWGRLDMGIRSLRY    |
| 138 | 0        | 83643062  | ref | YP_431497.1    | Peroxiredoxin                                                           | Haella chejuensis KCCT 2396      | FALPGAFTPTCSSTHLPCVSVNVMNSWKADQNGGFEFGKRSWRY   |
|     |          | 83631105  | gb  | ABC27072.1     | Peroxiredoxin                                                           | Haella chejuensis KCCT 2396      | FALPGAFTPTCSSTHLPCVSVNVMNSWKADQNGGFEFGKRSWRY   |
| 139 | 1.27E-20 | 91786177  | ref | YP_547129.1    | alkyl hydroperoxide reductase/ Thiol specific antioxidant/ M            | Polaromonas sp. JS666            | FALPGAFTPTCSAKHVPCVSVNVMGAWARDQMGLRSNRYGPGK    |
|     |          | 91695402  | gb  | ABE42231.1     | alkyl hydroperoxide reductase/ Thiol specific antioxidant/ M            | Polaromonas sp. JS666            | FALPGAFTPTCSAKHVPCVSVNVMGAWARDQMGLRSNRYGPGK    |
| 140 | 0        | 118484484 | gb  | ABK94117.1     | unknown                                                                 | Populus trichocarpa              | FGVPGAFTPTCSLKHVPCVSVNVMKAWAKSYLGRSRRFEGGGE    |
| 141 | 0        | 153007937 | ref | YP_001369152.1 | Redoxin domain protein                                                  | Ochrobactrum anthropi ATCC 49188 | FAVPGAFTPTCSLHPLPVAVNVMGAWAQSTGEGKLGIRSKRY     |
|     |          | 151559825 | gb  | ABS13323.1     | Redoxin domain protein                                                  | Ochrobactrum anthropi ATCC 49188 | FAVPGAFTPTCSLHPLPVAVNVMGAWAQSTGEGKLGIRSKRY     |
| 142 | 3.93E-09 | 116203717 | ref | XP_001227669.1 | hypothetical protein CHGG_09742                                         | Chaetomium globosum CBS 148.51   | PLASMATATIGVPAAFSPACSA THVDPAPAGGDRSKRYKVSVA   |
|     |          | 88175870  | gb  | EAG083338.1    | hypothetical protein CHGG_09742                                         | Chaetomium globosum CBS 148.51   | PLASMATATIGVPAAFSPACSA THVDPAPAGGDRSKRYKVSVA   |
| 143 | 1.62E-11 | 150951285 | ref | XP_001387583.2 | predicted protein                                                       | Pichia stipitis CBS 6054         | TAVPGAFTPTCTEQHIPVLSANVMAAWGKALDPLAFGVRTARY    |
|     |          | 149388467 | gb  | EAZ63560.2     | predicted protein                                                       | Pichia stipitis CBS 6054         | TAVPGAFTPTCTEQHIPVLSANVMAAWGKALDPLAFGVRTARY    |
| 144 | 0        | 114638293 | ref | XP_001164621.1 | PREDICTED: peroxiredoxin 5 isoform 5                                    | Pan troglodytes                  | FGVPGAFTPGCSKTHLPCVSVNVTGEWGRAHGNRRLKRFGTGL    |
|     |          | 69122338  | ref | NP_036226.1    | peroxiredoxin 5 precursor, isoform a                                    | Homo sapiens                     | FGVPGAFTPGCSKTHLPCVSVNVTGEWGRAHGNRRLKRFGTGL    |
| 145 | 0        | 20147173  | sp  | P30044         | PRDX5_HUMAN Peroxiredoxin-5, mitochondrial precursor (                  | Homo sapiens                     | FGVPGAFTPGCSKTHLPCVSVNVTGEWGRAHGNRRLKRFGTGL    |
|     |          | 6103724   | gb  | AAF03750.1     | AF110731_1 antioxidant enzyme B166                                      | Homo sapiens                     | FGVPGAFTPGCSKTHLPCVSVNVTGEWGRAHGNRRLKRFGTGL    |
|     |          | 8745394   | gb  | AAF78899.1     | AF231705_1 Alu co-repressor 1                                           | Homo sapiens                     | FGVPGAFTPGCSKTHLPCVSVNVTGEWGRAHGNRRLKRFGTGL    |
|     |          | 9802048   | gb  | AAF99605.1     | AF242525_1 hypothetical protein SBB110                                  | Homo sapiens                     | FGVPGAFTPGCSKTHLPCVSVNVTGEWGRAHGNRRLKRFGTGL    |
|     |          | 48146523  | emb | CAG33484.1     | PRDX5                                                                   | Homo sapiens                     | FGVPGAFTPGCSKTHLPCVSVNVTGEWGRAHGNRRLKRFGTGL    |
|     |          | 77864624  | gb  | ABB05181.1     | peroxiredoxin 5                                                         | Homo sapiens                     | FGVPGAFTPGCSKTHLPCVSVNVTGEWGRAHGNRRLKRFGTGL    |
|     |          | 83405871  | gb  | AAI10984.1     | Peroxiredoxin 5                                                         | Homo sapiens                     | FGVPGAFTPGCSKTHLPCVSVNVTGEWGRAHGNRRLKRFGTGL    |
|     |          | 109731135 | gb  | AAI13726.1     | Peroxiredoxin 5                                                         | Homo sapiens                     | FGVPGAFTPGCSKTHLPCVSVNVTGEWGRAHGNRRLKRFGTGL    |
|     |          | 109731385 | gb  | AAI13724.1     | Peroxiredoxin 5                                                         | Homo sapiens                     | FGVPGAFTPGCSKTHLPCVSVNVTGEWGRAHGNRRLKRFGTGL    |
| 146 | 0        | 145636341 | ref | ZP_01791043.1  | hypothetical protein CGSHIAA_09567                                      | Haemophilus influenzae PittAA    | FSLPGAFTPTCSSSHLPCVSVNVMNAWKDEGEGFEFGKRSWRY    |
|     |          | 145267347 | gb  | EDK07349.1     | hypothetical protein CGSHIAA_09567                                      | Haemophilus influenzae PittAA    | FSLPGAFTPTCSSSHLPCVSVNVMNAWKDEGEGFEFGKRSWRY    |
| 147 | 5.00E-14 | 145610855 | ref | XP_368384.2    | hypothetical protein MGG_00860                                          | Magnaporthe oryzae 70-15         | IGVPAAFSGACSTSHIPDVQVSVNVMKAWAEQMGNDRSKRY      |

|     |          |               |                |                                                        |                                        |                                                |
|-----|----------|---------------|----------------|--------------------------------------------------------|----------------------------------------|------------------------------------------------|
| 148 | 1.12E-11 | 145018196.gb  | EDK02475.1     | hypothetical protein MGG_00860                         | Magnaporthe grisea 70-15               | VGAGGGQAGNKVNFVPGVAFPTGCSKVRLLNRRLLKRFGL       |
| 149 | 0        | 32452260.ref  | NP_857634.1    | peroxiredoxin 5 precursor, isoform b                   | Homo sapiens                           | FSLPGAFTPTCSSTHLPVCSVNMVMEWAKDQNGDFGKRSWRY     |
|     |          | 34497491.ref  | NP_901706.1    | probable peroxiredoxin/glutaredoxin family protein     | Chromobacterium violaceum ATCC         | IGVPGAFSPACSAHVPPVAVNVTKAWGEQLSTGAGNERSKRY     |
| 150 | 3.37E-14 | 34103346.gb   | AAQ059708.1    | probable peroxiredoxin/glutaredoxin family protein     | Chromobacterium violaceum ATCC         | IGVPGAFSPACSAHVPPVAVNVTKAWGEQLSTGAGNERSKRY     |
|     |          | 68480311.ref  | XP_715859.1    | putative peroxiredoxin                                 | Candida albicans SC5314                | IGVPGAFSPACSAHVPPVAVNVTKAWGEQLSTGAGNERSKRY     |
|     |          | 46437502.gb   | EAK96847.1     | potential peroxiredoxin                                | Candida albicans SC5314                | IGVPGAFSPACSAHVPPVAVNVTKAWGEQLSTGAGNERSKRY     |
| 151 | 2.31E-12 | 121719390.ref | XP_001276394.1 | allergen, putative                                     | Aspergillus clavatus NRRL 1            | FSVPGAFPTCSVNHMPVAVVVMVSAWGWKANNNGRTGRYGSGA    |
|     |          | 119404592.gb  | EAW14968.1     | allergen, putative                                     | Aspergillus clavatus NRRL 1            | FSVPGAFPTCSVNHMPVAVVVMVSAWGWKANNNGRTGRYGSGA    |
| 152 | 1.22E-14 | 113935915.ref | ZP_01421811.1  | conserved hypothetical protein                         | Caulobacter sp. K31                    | VFKTRVRDEFGLPGAFTPTCSNEQTPCLAVNFYRSWRYPDYD     |
|     |          | 11329643.gb   | EAU10717.1     | conserved hypothetical protein                         | Caulobacter sp. K31                    | VFKTRVRDEFGLPGAFTPTCSNEQTPCLAVNFYRSWRYPDYD     |
| 153 | 1.40E-17 | 5696971.ref   | YP_167333.1    | antioxidant, AhpC/Tsa family                           | Silicibacter pomeroyi DSS-3            | FSLPGAFTPTCSTYQLPCMSVNMVNMKVAEAGSGGEFGFRSWRY   |
|     |          | 56678708.gb   | AAV95374.1     | antioxidant, AhpC/Tsa family                           | Silicibacter pomeroyi DSS-3            | FSLPGAFTPTCSTYQLPCMSVNMVNMKVAEAGSGGEFGFRSWRY   |
| 154 | 0        | 109899643.ref | YP_662898.1    | Glutaredoxin-family domain protein                     | Pseudoalteromonas atlantica T6c        | FSLPGAFTPTCSSTHLPVCSVNMVNAWAQDQFGKRSWRYDPFE    |
|     |          | 109701924.gb  | ABG41844.1     | Glutaredoxin-family domain protein                     | Pseudoalteromonas atlantica T6c        | FSLPGAFTPTCSSTHLPVCSVNMVNAWAQDQFGKRSWRYDPFE    |
| 155 | 1.36E-21 | 16127624.ref  | NP_422188.1    | AhpC/TSA family protein                                | Caulobacter crescentus CB15            | GFAPFAVPGAFTPTCSAKHLPVCSVNMVNAWAQDQFGKRSWRY    |
|     |          | 13425104.gb   | AAK25356.1     | AhpC/TSA family protein                                | Caulobacter crescentus CB15            | GFAPFAVPGAFTPTCSAKHLPVCSVNMVNAWAQDQFGKRSWRY    |
| 156 | 0        | 162666798.gb  | ED053443.1     | predicted protein                                      | Physcomitrella patens subsp. patens    | FGVPGAFTPTCSLKHVPCITVNVVKEWETKYMGRVRSRYGGGL    |
| 157 | 1.25E-20 | 115444771.ref | NP_001046165.1 | Os02g0192700                                           | Oryza sativa (japonica cultivar-group) | ATGVFAVPGAFTPTCSQKHLPCVSNVVMRAWKESLLGVRSRRY    |
|     |          | 75139348.sp   | QJ7F8S5        | PR2E2_ORYSJ Peroxiredoxin-2E-2, chloroplast, precursor | Oryza sativa (japonica cultivar-group) | ATGVFAVPGAFTPTCSQKHLPCVSNVVMRAWKESLLGVRSRRY    |
|     |          | 46389828.dbj  | BAD15391.1     | putative thioredoxin peroxidase                        | Oryza sativa (japonica cultivar-group) | ATGVFAVPGAFTPTCSQKHLPCVSNVVMRAWKESLLGVRSRRY    |
|     |          | 50726415.dbj  | BAD34026.1     | putative thioredoxin peroxidase                        | Oryza sativa (japonica cultivar-group) | ATGVFAVPGAFTPTCSQKHLPCVSNVVMRAWKESLLGVRSRRY    |
|     |          | 113535696.dbj | YAF08079.1     | Os02g0192700                                           | Oryza sativa (japonica cultivar-group) | ATGVFAVPGAFTPTCSQKHLPCVSNVVMRAWKESLLGVRSRRY    |
| 158 | 2.47E-15 | 148552945.ref | YP_001260527.1 | Redoxin domain protein                                 | Spingomonas wittichii RW1              | HTGEFALPGAFTPTCSTEQCPCLSVNMVYQWAKQLFGDRSWRY    |
|     |          | 148498135.gb  | ABQ066389.1    | Redoxin domain protein                                 | Spingomonas wittichii RW1              | HTGEFALPGAFTPTCSTEQCPCLSVNMVYQWAKQLFGDRSWRY    |
| 159 | 6.26E-09 | 50302773.ref  | XP_451323.1    | unnamed protein product                                | Kluyveromyces fragilis                 | PTGLVGLPAAFSPACSAHVPPVAVNVTKAWGEQLSTGAGNERSKRY |
|     |          | 49640454.emb  | CAH02911.1     | unnamed protein product                                | Kluyveromyces fragilis                 | PTGLVGLPAAFSPACSAHVPPVAVNVTKAWGEQLSTGAGNERSKRY |
| 160 | 2.57E-18 | 17987739.ref  | NP_540373.1    | THIOL PEROXIDASE                                       | Bruceella melitensis 16M               | FAVPGAFTPTCSLHLPVAVNVVMGAWAQSTGEGKLGVRSKRY     |
|     |          | 17983459.gb   | AAL52637.1     | THIOL PEROXIDASE                                       | Bruceella melitensis 16M               | FAVPGAFTPTCSLHLPVAVNVVMGAWAQSTGEGKLGVRSKRY     |
| 161 | 4.59E-19 | 90578646.ref  | ZP_01234456.1  | putative antioxidant                                   | Vibrio angustum S14                    | DTAEFAVPGAFTPTCSEAHLPVCSVNMVNAWAQDQFGKRSWRY    |
|     |          | 90439479.gb   | EAS64660.1     | putative antioxidant                                   | Vibrio angustum S14                    | DTAEFAVPGAFTPTCSEAHLPVCSVNMVNAWAQDQFGKRSWRY    |
| 162 | 0        | 125848530.ref | XP_001342297.1 | PRELICTED: hypothetical protein isoform 1              | Danio rerio                            | FGVPGAFTPGCSKTHLPCVSNVNMVSAWGWKANNNGRTGRYGTLG  |
| 163 | 0        | 33151875.ref  | NP_873228.1    | putative peroxiredoxin/glutaredoxin family protein     | Haemophilus ducreyi 35000HP            | FSLPGAFTPTCSSTHLPVCSVNMVNAWAQDQNGEFGNRSWRY     |
|     |          | 33148096.gb   | AAP95617.1     | putative peroxiredoxin/glutaredoxin family protein     | Haemophilus ducreyi 35000HP            | FSLPGAFTPTCSSTHLPVCSVNMVNAWAQDQNGEFGNRSWRY     |
| 164 | 4.94E-18 | 153838860.ref | ZP_01991527.1  | redoxin domain protein                                 | Vibrio parahaemolyticus AQ3810         | FAVPGAFTPTCSEAHLPVAVNVVMNAWGEAQDQGGGVRVRSQRY   |
|     |          | 149747688.gb  | EDM58598.1     | redoxin domain protein                                 | Vibrio parahaemolyticus AQ3810         | FAVPGAFTPTCSEAHLPVAVNVVMNAWGEAQDQGGGVRVRSQRY   |
| 165 | 8.97E-17 | 84515747.ref  | ZP_01003108.1  | AhpC/TSA family protein                                | Loktanella vestfoldensis SKA53         | FGLPGAFTGCTTAHVPCVSNVNMKAWGESTFVNRSKRYGPGQ     |
|     |          | 84510189.gb   | EAO06645.1     | AhpC/TSA family protein                                | Loktanella vestfoldensis SKA53         | FGLPGAFTGCTTAHVPCVSNVNMKAWGESTFVNRSKRYGPGQ     |
| 166 | 4.56E-18 | 71082835.ref  | YP_265554.1    | peroxisomal membrane protein a (pmp20)                 | Candidatus Pelagibacter ubique         | FGLPGAFTSVCSAKHLPCVSNVNMDSWGWKSQLGIRSNRYDAGA   |
|     |          | 91762742.ref  | ZP_01264707.1  | peroxisomal membrane protein a (pmp20)                 | Candidatus Pelagibacter ubique         | FGLPGAFTSVCSAKHLPCVSNVNMDSWGWKSQLGIRSNRYDAGA   |
|     |          | 71061948.gb   | AAZ20951.1     | peroxisomal membrane protein a (pmp20)                 | Candidatus Pelagibacter ubique         | FGLPGAFTSVCSAKHLPCVSNVNMDSWGWKSQLGIRSNRYDAGA   |
|     |          | 91718544.gb   | EAS85194.1     | peroxisomal membrane protein a (pmp20)                 | Candidatus Pelagibacter ubique         | FGLPGAFTSVCSAKHLPCVSNVNMDSWGWKSQLGIRSNRYDAGA   |
| 167 | 6.56E-14 | 83770679.dbj  | BAE60812.1     | unnamed protein product                                | Aspergillus oryzae                     | FSVPGAFPTCSVNHMPVAVVVMVSAWGWKANNNGRTGRYYTYA    |
| 169 | 2.33E-20 | 67643623.ref  | ZP_00442388.1  | COG0678: Peroxiredoxin                                 | Burkholderia mallei G88 horse 4        | GNPAFGLPGAFTPTCSAQHVPVAVNVVMGAWGRDLMGIRSRRY    |
|     |          | 83621161.ref  | ZP_00931573.1  | COG0678: Peroxiredoxin                                 | Burkholderia mallei FMH                | GNPAFGLPGAFTPTCSAQHVPVAVNVVMGAWGRDLMGIRSRRY    |
|     |          | 83625694.ref  | ZP_00935924.1  | COG0678: Peroxiredoxin                                 | Burkholderia mallei JHU                | GNPAFGLPGAFTPTCSAQHVPVAVNVVMGAWGRDLMGIRSRRY    |
|     |          | 100264082.ref | ZP_01338781.1  | hypothetical protein Bmal2_03003480                    | Burkholderia mallei 2002721280         | GNPAFGLPGAFTPTCSAQHVPVAVNVVMGAWGRDLMGIRSRRY    |
|     |          | 100917347.ref | ZP_01345825.1  | hypothetical protein Bmal10_03001094                   | Burkholderia mallei 10399              | GNPAFGLPGAFTPTCSAQHVPVAVNVVMGAWGRDLMGIRSRRY    |
|     |          | 147747056.gb  | EDK54133.1     | AhpC/TSA family protein                                | Burkholderia mallei FMH                | GNPAFGLPGAFTPTCSAQHVPVAVNVVMGAWGRDLMGIRSRRY    |
|     |          | 147752045.gb  | EDK59112.1     | AhpC/TSA family protein                                | Burkholderia mallei JHU                | GNPAFGLPGAFTPTCSAQHVPVAVNVVMGAWGRDLMGIRSRRY    |
|     |          | 148026709.gb  | EDK84794.1     | AhpC/TSA family protein                                | Burkholderia mallei 2002721280         | GNPAFGLPGAFTPTCSAQHVPVAVNVVMGAWGRDLMGIRSRRY    |
|     |          | 160694874.gb  | EDP84882.1     | AhpC/TSA family protein                                | Burkholderia mallei ATCC 10399         | GNPAFGLPGAFTPTCSAQHVPVAVNVVMGAWGRDLMGIRSRRY    |
| 170 | 1.06E-21 | 160898550.ref | YP_001561432.1 | Redoxin domain protein                                 | Deflitis acidovorans SPH-1             | FAVPGAFTPTCSAKHVPVAVNVVMGAWARDQLGIRSNRYGPGK    |
|     |          | 160361434.gb  | ABX33047.1     | Redoxin domain protein                                 | Deflitis acidovorans SPH-1             | FAVPGAFTPTCSAKHVPVAVNVVMGAWARDQLGIRSNRYGPGK    |
| 171 | 3.57E-17 | 57339780.gb   | AAW49877.1     | hypothetical protein FTI0557                           | synthetic construct                    | FSLPGAFTPTCSTYQLPRFKELGIDEVLSVNGNVEFGKRSWRY    |
| 172 | 1.09E-17 | 3462877.gb    | AAC34466.1     | unknown                                                | Rhizobium etli                         | FRTRVDFSLPGAFTPTCSFTQPLCLSVNMVNAWGSQSGE        |
| 173 | 1.55E-21 | 107021644.ref | YP_619971.1    | Redoxin                                                | Burkholderia cenocepacia AU_1054       | FGLPGAFTPTCSAQHVPVAVNVVMGAWARDLMGIRSLRDGGV     |
|     |          | 116688589.ref | YP_834212.1    | Redoxin domain protein                                 | Burkholderia cenocepacia H12424        | FGLPGAFTPTCSAQHVPVAVNVVMGAWARDLMGIRSLRDGGV     |
|     |          | 105891833.gb  | ABF74998.1     | Redoxin                                                | Burkholderia cenocepacia AU_1054       | FGLPGAFTPTCSAQHVPVAVNVVMGAWARDLMGIRSLRDGGV     |

|     |          |               |                                 |                                                                             |                                                                             |                                        |                                               |
|-----|----------|---------------|---------------------------------|-----------------------------------------------------------------------------|-----------------------------------------------------------------------------|----------------------------------------|-----------------------------------------------|
| 174 | 1.27E-11 | 116646678.gb  | ABK07319.1                      | Redoxin domain protein                                                      | Redoxin domain protein                                                      | Burkholderia cenocepacia H12424        | VGAGGGQAGNKVNFVPGAFIPGCSKVRLLGNRRLKRFGTGL     |
| 175 | 1.86E-19 | 118072324.ref | XP_001164504.1<br>ZP_01540514.1 | PREDICTED: peroxiredoxin 5 isoform 2                                        | Redoxin                                                                     | Pan troglodytes                        | FAVPGAFPTCSQSHPCLVSNVMKAWGDSQDTAGGGRSQRY      |
| 176 | 5.52E-19 | 118023202.gb  | EAV37016.1                      | Redoxin                                                                     | Redoxin                                                                     | Shewanella woodyi ATCC 51908           | GPNAFGLPGAFPTCSARHVPVCSVNVVMGAWARQMGIRSQRY    |
| 177 | 7.22E-09 | 121527984.ref | ZP_01660598.1                   | putative type 2 peroxiredoxin protein                                       | putative type 2 peroxiredoxin protein                                       | Shewanella woodyi ATCC 51908           | VINLRSSDEGVFLPGAYTGVCSKSHKVPVAINVVAEKI        |
| 178 | 0        | 121304752.gb  | EAX45716.1                      | peroxiredoxin IIF                                                           | peroxiredoxin IIF                                                           | Ralstonia pickettii 12J                | FGVPGAFIPGCSKTHLPCVSNVMSAWGKEHGGVRSKRYGTGL    |
| 179 | 1.32E-14 | 118721272.emb | CAL69875.1                      | similar to Drosophila melanogaster CG7217                                   | similar to Drosophila melanogaster CG7217                                   | Pisum sativum                          | GDGFAVPGAYTPTCDSAHVPCVSCNVMAAWGESTLISRKRY     |
| 180 | 5.37E-23 | 38048721.gb   | AAR10263.1                      | AlpC/TSA family protein                                                     | AlpC/TSA family protein                                                     | Drosophila yakuba                      | FSLPGAFTPTCSLQLPCVSNVNMNAWGKALGSGEFGMRSWRY    |
| 181 | 1.18E-20 | 83944231.ref  | ZP_00956686.1                   | AhpC/TSA family protein                                                     | AhpC/TSA family protein                                                     | Sulfitobacter sp. EE-36                | DTGEFAVPGAFPTCSAKHVPVCSVNVMTAWAESQLGVRSQRY    |
| 182 | 1.49E-15 | 83944775.gb   | EAP82657.1                      | CONSERVED HYPOTHETICAL-PEROXIREDOXIN 2 FAMILY                               | CONSERVED HYPOTHETICAL-PEROXIREDOXIN 2 FAMILY                               | Mesorhizobium loti                     | FALPGAFTPTCSSNHLPLCLSVNVMNAEWGQHQGNGEFGQRSRRY |
| 183 | 0        | 20804163.emb  | CAD31366.1                      | Redoxin domain protein                                                      | Redoxin domain protein                                                      | Acidiphilium cryptum JF-5              | FSLPGAFTPTCSSHLLPCVSNVNMNAWKADQGNGEFGKRSWRY   |
| 184 | 0        | 148260898.ref | YP_001235025.1                  | Redoxin domain protein                                                      | Redoxin domain protein                                                      | Acidiphilium cryptum JF-5              | FSLPGAFTPTCSSHLLPCVSNVNMNAWKADQGNGEFGKRSWRY   |
| 185 | 9.12E-22 | 146402579.gb  | ABQ31106.1                      | Glutaredoxin-like region                                                    | Glutaredoxin-like region                                                    | Chromohalobacter salexigenis DSM       | FSLPGAFTPTCSSHLLPCVSNVNMNAWKADQGNGEFGKRSWRY   |
| 186 | 0        | 92113381.ref  | YB_573309.1                     | Glutaredoxin-like region                                                    | Glutaredoxin-like region                                                    | Chromohalobacter salexigenis DSM       | FSLPGAFTPTCSSHLLPCVSNVNMNAWKADQGNGEFGKRSWRY   |
| 187 | 6.96E-19 | 91796471.gb   | ABE58610.1                      | Glutaredoxin-like region                                                    | Glutaredoxin-like region                                                    | Ralstonia eutropha JMP134              | FSLPGAFTPTCSSHLLPCVSNVNMNAWKADQGNGEFGKRSWRY   |
| 188 | 0        | 73593279.ref  | YP_298646.1                     | Glutaredoxin-like region                                                    | Glutaredoxin-like region                                                    | Ralstonia eutropha JMP134              | FSLPGAFTPTCSSHLLPCVSNVNMNAWKADQGNGEFGKRSWRY   |
| 189 | 0        | 72121616.gb   | AAZ63802.1                      | Glutaredoxin-like region                                                    | Glutaredoxin-like region                                                    | Ralstonia eutropha JMP134              | FSLPGAFTPTCSSHLLPCVSNVNMNAWKADQGNGEFGKRSWRY   |
| 190 | 0        | 54307493.ref  | YP_128513.1                     | Putative peroxiredoxin/glutaredoxin family protein                          | Putative peroxiredoxin/glutaredoxin family protein                          | Photobacterium profundum SS9           | FSLPGAFTPTCSSHLLPCVSNVNMNAWKADQGNGEFGKRSWRY   |
| 191 | 0        | 46911913.emb  | CAG18711.1                      | Putative peroxiredoxin/glutaredoxin family protein                          | Putative peroxiredoxin/glutaredoxin family protein                          | Photobacterium profundum SS9           | FSLPGAFTPTCSSHLLPCVSNVNMNAWKADQGNGEFGKRSWRY   |
| 192 | 0        | 115439131.ref | NP_001043845.1                  | Os01g0675100                                                                | Os01g0675100                                                                | Oryza sativa (japonica cultivar-group) | FGVPGAFPTCSNHQVPLVSNVMKAWAKSYGYTYTLGIRSRFF    |
| 193 | 0        | 75172153.sp   | Q9FR35                          | PRX2C_ORYSJ Peroxiredoxin-2C (Peroxiredoxin IIC) (Thioredoxin reductase 2C) | PRX2C_ORYSJ Peroxiredoxin-2C (Peroxiredoxin IIC) (Thioredoxin reductase 2C) | Oryza sativa (japonica cultivar-group) | FSLPGAFTPTCSSHLLPCVSNVNMNAWKADQGNGEFGKRSWRY   |
| 194 | 0        | 11761654.gb   | AAG40130.1                      | AF203879_1 peroxiredoxin                                                    | AF203879_1 peroxiredoxin                                                    | Oryza sativa                           | FSLPGAFTPTCSSHLLPCVSNVNMNAWKADQGNGEFGKRSWRY   |
| 195 | 0        | 21644633.dbj  | BAC01192.1                      | putative thioredoxin peroxidase                                             | putative thioredoxin peroxidase                                             | Oryza sativa (japonica cultivar-group) | FSLPGAFTPTCSSHLLPCVSNVNMNAWKADQGNGEFGKRSWRY   |
| 196 | 0        | 113533376.dbj | EAF05759.1                      | putative thioredoxin peroxidase                                             | putative thioredoxin peroxidase                                             | Oryza sativa (japonica cultivar-group) | FSLPGAFTPTCSSHLLPCVSNVNMNAWKADQGNGEFGKRSWRY   |
| 197 | 0        | 125527234.gb  | EAY75346.1                      | hypothetical protein OsJ_003195                                             | Os01g0675100                                                                | Oryza sativa (japonica cultivar-group) | FSLPGAFTPTCSSHLLPCVSNVNMNAWKADQGNGEFGKRSWRY   |
| 198 | 0        | 125571551.gb  | EAZ13066.1                      | hypothetical protein OsJ_022891                                             | hypothetical protein OsJ_022891                                             | Oryza sativa (japonica cultivar-group) | FSLPGAFTPTCSSHLLPCVSNVNMNAWKADQGNGEFGKRSWRY   |
| 199 | 0        | 90580867.ref  | ZP_01236669.1                   | Putative peroxiredoxin/glutaredoxin family protein                          | Putative peroxiredoxin/glutaredoxin family protein                          | Vibrio angustum S14                    | FSLPGAFTPTCSSHLLPCVSNVNMNAWKADQGNGEFGKRSWRY   |
| 200 | 0        | 90437938.gb   | EAS63127.1                      | Putative peroxiredoxin/glutaredoxin family protein                          | Putative peroxiredoxin/glutaredoxin family protein                          | Vibrio angustum S14                    | FSLPGAFTPTCSSHLLPCVSNVNMNAWKADQGNGEFGKRSWRY   |
| 201 | 0        | 114569028.ref | NP_001058113.1                  | Os06g0625500                                                                | Os06g0625500                                                                | Oryza sativa (japonica cultivar-group) | FSLPGAFTPTCSSHLLPCVSNVNMNAWKADQGNGEFGKRSWRY   |
| 202 | 0        | 75119143.sp   | Q89TY4                          | PR2E1_ORYSJ Peroxiredoxin-2E-1, chloroplast precursor                       | PR2E1_ORYSJ Peroxiredoxin-2E-1, chloroplast precursor                       | Oryza sativa (japonica cultivar-group) | FSLPGAFTPTCSSHLLPCVSNVNMNAWKADQGNGEFGKRSWRY   |
| 203 | 0        | 51091051.dbj  | BAD35693.1                      | putative thioredoxin peroxidase 1                                           | putative thioredoxin peroxidase 1                                           | Oryza sativa (japonica cultivar-group) | FSLPGAFTPTCSSHLLPCVSNVNMNAWKADQGNGEFGKRSWRY   |
| 204 | 0        | 51535721.dbj  | BAD3738.1                       | putative thioredoxin peroxidase 1                                           | putative thioredoxin peroxidase 1                                           | Oryza sativa (japonica cultivar-group) | FSLPGAFTPTCSSHLLPCVSNVNMNAWKADQGNGEFGKRSWRY   |
| 205 | 0        | 113596153.dbj | BAF20027.1                      | Os06g0625500                                                                | Os06g0625500                                                                | Oryza sativa (japonica cultivar-group) | FSLPGAFTPTCSSHLLPCVSNVNMNAWKADQGNGEFGKRSWRY   |
| 206 | 0        | 125556133.gb  | EAZ01739.1                      | hypothetical protein OsL_022971                                             | hypothetical protein OsL_022971                                             | Oryza sativa (japonica cultivar-group) | FSLPGAFTPTCSSHLLPCVSNVNMNAWKADQGNGEFGKRSWRY   |
| 207 | 0        | 156056134.ref | XP_001593991.1                  | peroxiredoxin                                                               | peroxiredoxin                                                               | Sclerotinia sclerotiorum 1980          | FSLPGAFTPTCSSHLLPCVSNVNMNAWKADQGNGEFGKRSWRY   |
| 208 | 0        | 154703203.gb  | ED002942.1                      | peroxiredoxin                                                               | peroxiredoxin                                                               | Sclerotinia sclerotiorum 1980          | FSLPGAFTPTCSSHLLPCVSNVNMNAWKADQGNGEFGKRSWRY   |
| 209 | 0        | 86147320.ref  | ZP_01065634.1                   | glutaredoxin                                                                | glutaredoxin                                                                | Vibrio sp. MED222                      | FSLPGAFTPTCSSHLLPCVSNVNMNAWKADQGNGEFGKRSWRY   |
| 210 | 0        | 85834885.gb   | EAG53029.1                      | glutaredoxin                                                                | glutaredoxin                                                                | Vibrio sp. MED222                      | FSLPGAFTPTCSSHLLPCVSNVNMNAWKADQGNGEFGKRSWRY   |
| 211 | 0        | 119487340.ref | ZP_01621091.1                   | Glutaredoxin-like region protein                                            | Glutaredoxin-like region protein                                            | Lyngbya sp. PCC 8106                   | FSLPGAFTPTCSSHLLPCVSNVNMNAWKADQGNGEFGKRSWRY   |
| 212 | 0        | 119455895.gb  | EAW37030.1                      | Glutaredoxin-like region protein                                            | Glutaredoxin-like region protein                                            | Lyngbya sp. PCC 8106                   | FSLPGAFTPTCSSHLLPCVSNVNMNAWKADQGNGEFGKRSWRY   |
| 213 | 0        | 158336812.ref | YP_001517986.1                  | peroxiredoxin, putative                                                     | peroxiredoxin, putative                                                     | Acarochloris marina MBIC11017          | FSLPGAFTPTCSSHLLPCVSNVNMNAWKADQGNGEFGKRSWRY   |
| 214 | 0        | 158307053.gb  | ABW28670.1                      | peroxiredoxin, putative                                                     | peroxiredoxin, putative                                                     | Acarochloris marina MBIC11017          | FSLPGAFTPTCSSHLLPCVSNVNMNAWKADQGNGEFGKRSWRY   |
| 215 | 0        | 147065633.ref | ZP_01439464.1                   | THIOL PEROXIDASE                                                            | THIOL PEROXIDASE                                                            | Fulvmarina pelagi HTCC2506             | FSLPGAFTPTCSSHLLPCVSNVNMNAWKADQGNGEFGKRSWRY   |
| 216 | 0        | 114537955.gb  | EAU41078.1                      | THIOL PEROXIDASE                                                            | THIOL PEROXIDASE                                                            | Fulvmarina pelagi HTCC2506             | FSLPGAFTPTCSSHLLPCVSNVNMNAWKADQGNGEFGKRSWRY   |
| 217 | 0        | 78706776.ref  | NP_001027191.1                  | CG7217 CG7217-PB, isoform B                                                 | CG7217 CG7217-PB, isoform B                                                 | Drosophila melanogaster                | FSLPGAFTPTCSSHLLPCVSNVNMNAWKADQGNGEFGKRSWRY   |
| 218 | 0        | 78706776.ref  | NP_6500679.3                    | CG7217 CG7217-PA, isoform A                                                 | CG7217 CG7217-PA, isoform A                                                 | Drosophila melanogaster                | FSLPGAFTPTCSSHLLPCVSNVNMNAWKADQGNGEFGKRSWRY   |
| 219 | 0        | 15292277.gb   | AAK93407.1                      | LD45324p                                                                    | LD45324p                                                                    | Drosophila melanogaster                | FSLPGAFTPTCSSHLLPCVSNVNMNAWKADQGNGEFGKRSWRY   |
| 220 | 0        | 25012449.gb   | AAAT1330.1                      | RE23139p                                                                    | RE23139p                                                                    | Drosophila melanogaster                | FSLPGAFTPTCSSHLLPCVSNVNMNAWKADQGNGEFGKRSWRY   |
| 221 | 0        | 28317021.gb   | AAO39530.1                      | RE19605p                                                                    | RE19605p                                                                    | Drosophila melanogaster                | FSLPGAFTPTCSSHLLPCVSNVNMNAWKADQGNGEFGKRSWRY   |
| 222 | 0        | 28381340.gb   | AAO41575.1                      | CG7217-PB, isoform B                                                        | CG7217-PB, isoform B                                                        | Drosophila melanogaster                | FSLPGAFTPTCSSHLLPCVSNVNMNAWKADQGNGEFGKRSWRY   |
| 223 | 0        | 71854599.gb   | AAF55497.2                      | CG7217-PA, isoform A                                                        | CG7217-PA, isoform A                                                        | Drosophila melanogaster                | FSLPGAFTPTCSSHLLPCVSNVNMNAWKADQGNGEFGKRSWRY   |
| 224 | 0        | 21241904.ref  | NP_641486.1                     | peroxiredoxin                                                               | peroxiredoxin                                                               | Xanthomonas axonopodis pv. citri str.  | FSLPGAFTPTCSSHLLPCVSNVNMNAWKADQGNGEFGKRSWRY   |
| 225 | 0        | 21107291.gb   | AAAM36022.1                     | peroxiredoxin                                                               | peroxiredoxin                                                               | Xanthomonas axonopodis pv. citri str.  | FSLPGAFTPTCSSHLLPCVSNVNMNAWKADQGNGEFGKRSWRY   |
| 226 | 0        | 13872871.dbj  | BAB43979.1                      | peroxisomal membrane protein 20                                             | peroxisomal membrane protein 20                                             | Candida boidinii                       | FSLPGAFTPTCSSHLLPCVSNVNMNAWKADQGNGEFGKRSWRY   |
| 227 | 0        | 161869858.ref | YP_001599027.1                  | peroxiredoxin 2 family protein/glutaredoxin                                 | peroxiredoxin 2 family protein/glutaredoxin                                 | Neisseria meningitidis 053442          | FSLPGAFTPTCSSHLLPCVSNVNMNAWKADQGNGEFGKRSWRY   |
| 228 | 0        | 161595411.gb  | ABX73071.1                      | peroxiredoxin 2 family protein/glutaredoxin                                 | peroxiredoxin 2 family protein/glutaredoxin                                 | Neisseria meningitidis 053442          | FSLPGAFTPTCSSHLLPCVSNVNMNAWKADQGNGEFGKRSWRY   |
| 229 | 0        | 86748468.ref  | YP_484964.1                     | Alkyl hydroperoxide reductase/ Thiol specific antioxidant/ M                | Alkyl hydroperoxide reductase/ Thiol specific antioxidant/ M                | Rhodospseudomonas palustris HaA2       | FSLPGAFTPTCSSHLLPCVSNVNMNAWKADQGNGEFGKRSWRY   |



|     |          |           |     |                |                                                              |                                     |                                                 |
|-----|----------|-----------|-----|----------------|--------------------------------------------------------------|-------------------------------------|-------------------------------------------------|
| 198 | 0        | 86571496  | gb  | ABD06053.1     | Alkyl hydroperoxide reductase/ Thiol specific antioxidant/ M | Rhodopseudomonas palustris HaA2     | FSLPGAFTPTCSSSHLPCVSVNVMNMAWKAQDQNGNFGPRSWRY    |
| 199 | 3.73E-21 | 77973000  | ref | ZP_00828554.1  | COG0678: Peroxiredoxin                                       | Yersinia frederiksenii ATCC 33841   | GPVEFAVPGAFPTCTSLNHLFPVSVNVMGAWAQSSLGVRSKRY     |
|     |          | 15888122  | ref | NP_353803.1    | peroxiredoxin                                                | Agrobacterium tumefaciens str. C58  |                                                 |
|     |          | 15155756  | gb  | AAK86588.1     | peroxiredoxin                                                | Agrobacterium tumefaciens str. C58  |                                                 |
| 200 | 3.42E-16 | 94496864  | ref | ZP_01303438.1  | peroxiredoxin/glutaredoxin family protein                    | Spingomonas sp. SKA58               | FSLPGAFTPTCSTEQCPVSVNVMYQWKGKQLFGERSWRYDAGE     |
|     |          | 94423540  | gb  | EAT08567.1     | peroxiredoxin/glutaredoxin family protein                    | Spingomonas sp. SKA58               |                                                 |
| 201 | 5.97E-18 | 12055937  | ref | YP_961511.1    | Redoxin domain protein                                       | Shewanella sp. W3-18-1              | GTLSFVPGAFPTCSEAHLPVAVNVMKAWGEAQGGIRSQR         |
|     |          | 120557030 | gb  | ABM22957.1     | Redoxin domain protein                                       | Shewanella sp. W3-18-1              |                                                 |
| 202 | 0        | 85711542  | ref | ZP_01042600.1  | Peroxiredoxin_AhpC/Tsa family protein                        | Idiomarina baltica OS145            | FAVPGAFPTCSEKHLPCVSVNVMKAWGDHLDGNGEGIRSKRY      |
|     |          | 85694694  | gb  | EA032634.1     | Peroxiredoxin_AhpC/Tsa family protein                        | Idiomarina baltica OS145            |                                                 |
| 203 | 1.67E-14 | 70985384  | ref | XP_748198.1    | allergen, putative                                           | Aspergillus fumigatus Af293         | FSVPGAFPTCSANHLPLVLSNVMMSAWGKANVTGDLSDPQARF     |
|     |          | 66945826  | gb  | EAL86160.1     | allergen, putative                                           | Aspergillus fumigatus Af293         |                                                 |
| 205 | 0        | 156373030 | ref | XP_001029337.1 | predicted protein                                            | Nematostella vectensis              | FAVPGAFTPGCSKTHLPCIAVNVMSAWGEANGNIRSKRYGTGL     |
|     |          | 156216335 | gb  | EDO37274.1     | predicted protein                                            | Nematostella vectensis              |                                                 |
| 206 | 0        | 42630851  | ref | ZP_00156390.1  | COG0678: Peroxiredoxin                                       | Haemophilus influenzae R2866        | FSLPGAFTPTCSSSHLPPVSVNVMNAWKEDEGNGEFGKRSWRY     |
|     |          | 68249172  | ref | YP_248284.1    | peroxiredoxin/glutaredoxin                                   | Haemophilus influenzae 86-028NP     |                                                 |
|     |          | 145628955 | ref | ZP_01784755.1  | DNA-binding transcriptional regulator OxyR                   | Haemophilus influenzae 22.1-21      |                                                 |
|     |          | 14563748  | ref | ZP_01787509.1  | hypothetical protein CGSHI2421_05982                         | Haemophilus influenzae 22.4-21      |                                                 |
|     |          | 145638519 | ref | ZP_01794128.1  | hypothetical protein CGSHill_07391                           | Haemophilus influenzae Pittii       |                                                 |
|     |          | 145640548 | ref | ZP_01796132.1  | DNA-binding transcriptional regulator OxyR                   | Haemophilus influenzae R3021        |                                                 |
|     |          | 145642264 | ref | ZP_01797829.1  | DNA-binding transcriptional regulator OxyR                   | Haemophilus influenzae R3021        |                                                 |
|     |          | 68057371  | gb  | AAK87624.1     | peroxiredoxin/glutaredoxin                                   | Haemophilus influenzae 86-028NP     |                                                 |
|     |          | 144979425 | gb  | EDJ89111.1     | DNA-binding transcriptional regulator OxyR                   | Haemophilus influenzae 22.1-21      |                                                 |
|     |          | 144982609 | gb  | EDJ90155.1     | hypothetical protein CGSHI2421_05982                         | Haemophilus influenzae R3021        |                                                 |
|     |          | 14527114  | gb  | EDK12022.1     | hypothetical protein CGSHill_07391                           | Haemophilus influenzae Pittii       |                                                 |
|     |          | 145273020 | gb  | EDK12901.1     | DNA-binding transcriptional regulator OxyR                   | Haemophilus influenzae 22.4-21      |                                                 |
|     |          | 145275134 | gb  | EDK14996.1     | DNA-binding transcriptional regulator OxyR                   | Haemophilus influenzae 22.4-21      |                                                 |
| 207 | 6.17E-17 | 119475977 | ref | ZP_01616329.1  | membrane protein                                             | marine gamma proteobacterium        | VFKTRVDELALPAGFTPTCSGTHLPCLSVNVGNGEFGDRSWRY     |
|     |          | 119450604 | gb  | EAW31838.1     | membrane protein                                             | marine gamma proteobacterium        |                                                 |
| 208 | 4.49E-20 | 109896686 | ref | YP_659941.1    | Redoxin                                                      | Pseudoalteromonas atlantica T6c     | FAVPGAFPTCSNTHLPCLSVNVMEAWGKSQDTGTGGLRSRGY      |
|     |          | 109898967 | gb  | ABG38887.1     | Redoxin                                                      | Pseudoalteromonas atlantica T6c     |                                                 |
| 209 | 0        | 91080447  | ref | XP_969254.1    | PREDICTED: similar to CG7217-PB, isoform B                   | Tribolium castaneum                 | FAVPGAFTPGCSKTHLPCVSVNVMMAWKAQDQGGTRSKRYGTGL    |
| 210 | 3.19E-13 | 154280557 | ref | XP_001641091.1 | hypothetical protein HCAG_03188                              | Ajielomyces capsulatus NAm1         | FAVPGAFTPCSASHLPVAVLMSAWGKANVTGNMIGRTARY        |
|     |          | 150411270 | gb  | EDN06658.1     | hypothetical protein HCAG_03188                              | Ajielomyces capsulatus NAm1         |                                                 |
| 211 | 0        | 46015018  | pdb | 1OC3           | A Chain A, Human Peroxiredoxin 5                             | Homo sapiens                        | FGVPGAFTPGCSKTHLPCLSVNVTVGEWGRAHGNRRLKRFGTGL    |
|     |          | 46015019  | pdb | 1OC3           | B Chain B, Human Peroxiredoxin 5                             | Homo sapiens                        |                                                 |
|     |          | 46015020  | pdb | 1OC3           | C Chain C, Human Peroxiredoxin 5                             | Homo sapiens                        |                                                 |
| 212 | 3.94E-14 | 83950502  | ref | ZP_00959235.1  | AhpC/TSA family protein                                      | Roseovanius nubinihibens ISM        | GPEQFALPGAFTGVCNHAHVPCISVNVVMGAWGESTLIDRSKRY    |
|     |          | 83838401  | gb  | EAP77697.1     | AhpC/TSA family protein                                      | Roseovanius nubinihibens ISM        |                                                 |
| 213 | 0        | 126208946 | ref | YP_001054171.1 | hybrid peroxiredoxin HyPrx5                                  | Actinobacillus pleuropneumoniae L20 | FSLPGAFTPTCSSTHLPCMSVNVNMAWKAQDQNGEFGKRSWRY     |
|     |          | 126097738 | gb  | ABN74566.1     | hybrid peroxiredoxin HyPrx5                                  | Actinobacillus pleuropneumoniae L20 |                                                 |
| 214 | 0        | 77961064  | ref | ZP_00824912.1  | COG0678: Peroxiredoxin                                       | Yersinia mollaretii ATCC 43969      | FSLPGAFTPTCSSSHLPCVSVNVMNMAWKAQDQNGEFGPRSWRY    |
| 215 | 7.93E-18 | 124548023 | ref | ZP_01706805.1  | Redoxin                                                      | Shewanella putrefaciens 200         | GTLSFVPGAFPTCSEAHLPVAVNVMKAWGEAQGGIRSQR         |
|     |          | 146294930 | ref | YP_001185354.1 | Redoxin domain protein                                       | Shewanella putrefaciens CN-32       |                                                 |
|     |          | 124508722 | gb  | EAY52812.1     | Redoxin                                                      | Shewanella putrefaciens 200         |                                                 |
|     |          | 145666620 | gb  | ABP77555.1     | Redoxin domain protein                                       | Shewanella putrefaciens CN-32       |                                                 |
| 216 | 1.01E-20 | 126450084 | ref | YP_001082756.1 | AhpC/TSA family protein                                      | Burkholderia mallei NCTC 10247      | GPGMFGLPGAFTPTCSAQHPVAVNVMGAWGRDLMGIRSRRY       |
|     |          | 126242954 | gb  | ABO06047.1     | AhpC/TSA family protein                                      | Burkholderia mallei NCTC 10247      |                                                 |
| 217 | 4.20E-17 | 79320786  | ref | NP_001031239.1 | TPX1 (THIOREDOXIN-DEPENDENT PEROXIDASE 1); an                | Arabidopsis thaliana                | DGTISFFDFGVPGAFPTCSMKHVPVGVDFCFVSNVMKAWGKTY     |
| 218 | 3.17E-22 | 15218877  | ref | NP_176773.1    | TPX1 (THIOREDOXIN-DEPENDENT PEROXIDASE 1); an                | Arabidopsis thaliana                | FGVPGAFPTCSMKHVPVGVDFCFVSNVMKAWGKTYGSGELGVRSRFF |
|     |          | 7538536   | sp  | Q9XEX2         | PRX2B_ARATH Peroxiredoxin-2B (Peroxiredoxin IIb) (Thior      | Arabidopsis thaliana                |                                                 |
|     |          | 4704730   | gb  | AAD28242.1     | AF121355.1 peroxiredoxin TPx1                                | Arabidopsis thaliana                |                                                 |
|     |          | 6227022   | gb  | AAF06058.1     | AC009513_14 identical to gb:AF121355 peroxiredoxin TPx1      | Arabidopsis thaliana                |                                                 |
|     |          | 12083336  | gb  | AAG48827.1     | AF332464.1 putative type 2 peroxiredoxin protein             | Arabidopsis thaliana                |                                                 |
|     |          | 18086474  | gb  | AAL57690.1     | AT1965980/F12P19_14                                          | Arabidopsis thaliana                |                                                 |
| 219 | 2.09E-16 | 110832905 | ref | YP_691764.1    | AhpC/TSA family protein                                      | Alcanivorax borkumensis SK2         | FAVPGAFTPGCSNTHMPCMAVNVVMGAWKQDQATGGMGIRSKRF    |
|     |          | 110846016 | emb | CAL15492.1     | AhpC/TSA family protein                                      | Alcanivorax borkumensis SK2         |                                                 |

|     |          |               |                |                                                              |                                        |                                             |
|-----|----------|---------------|----------------|--------------------------------------------------------------|----------------------------------------|---------------------------------------------|
| 220 | 0        | 125620178.gb  | ABN46981.1     | thioredoxin-dependent peroxidase                             | Nelumbo nucifera                       | GTLSEGVPGAFPTCSLKHVPLISVNMVMAWAKTYLGTISRFR  |
| 221 | 0        | 38488593.dbj  | BAD02311.1     | peroxiredoxin like protein                                   | Actinobacillus actinomycesetemcomitans | FSLPGAFPTCSSSHLPVSVNMVMAWKEDEGNGEFGKRSWRY   |
| 222 | 2.83E-17 | 146279039.ref | YP_001169198.1 | Redoxin domain protein                                       | Rhodobacter sphaeroides ATCC 17025     | FAVPGAYPTCHSAHVPGVEECISVNMVMAWGESLIGRSKRY   |
| 223 | 0        | 145557280.gb  | ABF71893.1     | thiol peroxidase (atypical 2-Cys peroxiredoxin)              | Rhodobacter sphaeroides ATCC 17025     | FSLPGAFPTCSSSHLPVSVNMVMAWAKADQFGKRSWRYGWE   |
| 224 | 8.71E-21 | 145961934.gb  | EDK27224.1     | glutaredoxin                                                 | Vibronales bacterium SWAT-3            | FSLPGAFPTCSSSHLPVSVNMVMAWAKADQFGKRSWRYGWE   |
| 225 | 2.04E-10 | 85707092.gb   | EAQ25831.1     | AhpC/TSA family protein                                      | Roseovanius sp. 217                    | FAVPGAYPTCSSAHVPCISVNMVMAWGEATLLGRSKRYGTCE  |
| 226 | 1.14E-19 | 21492746.ref  | NP_659821.1    | putative hydroperoxide reductase protein                     | Roseovanius sp. 217                    | FAVPGAYPTCSSAHVPCISVNMVMAWGEATLLGRSKRYGTCE  |
| 227 | 1.68E-15 | 149927139.ref | ZP_01915396.1  | probable type 2 peroxiredoxin protein                        | Limnobacter sp. MED105                 | LALPGAYPTCSAKHVPVAVNMVMAWKSIMVGRSNRYAPGV    |
| 228 | 1.19E-18 | 62289459.ref  | YP_221252.1    | ahpC/TSA family protein                                      | Limnobacter sp. MED105                 | LALPGAYPTCSAKHVPVAVNMVMAWKSIMVGRSNRYAPGV    |
| 229 | 0        | 66360171.pdb  | 1TP9           | A Chain A, Prx D (Type I) From Populus Tremula               | Brucella abortus biovar 1 str. 9-941   | FAVPGAFPTCSLHLPVAVNMVMAWQAQSTGEGKLGVRSKRY   |
| 230 | 4.86E-09 | 125525315.gb  | EAY73429.1     | hypothetical protein OsL_001276                              | Populus tremula                        | FGVPGAFPTCSLKHVPCISVNMVMAWAKADQGNGEFGKRSWRY |
| 231 | 9.88E-18 | 83946316.ref  | ZP_00957684.1  | AhpC/TSA family protein                                      | Populus tremula                        | FGVPGAFPTCSLKHVPCISVNMVMAWAKADQGNGEFGKRSWRY |
| 232 | 0        | 59712907.ref  | YP_205683.1    | glutaredoxin                                                 | Populus tremula                        | FGVPGAFPTCSLKHVPCISVNMVMAWAKADQGNGEFGKRSWRY |
| 233 | 2.68E-18 | 162897468.gb  | EDQ83804.1     | predicted protein                                            | Populus tremula                        | FGVPGAFPTCSLKHVPCISVNMVMAWAKADQGNGEFGKRSWRY |
| 234 | 0        | 162897467.gb  | EDQ83803.1     | predicted protein                                            | Populus tremula                        | FGVPGAFPTCSLKHVPCISVNMVMAWAKADQGNGEFGKRSWRY |
| 235 | 7.12E-15 | 119472653.ref | XP_001258393.1 | AhpC/TSA family protein                                      | Populus tremula                        | FGVPGAFPTCSLKHVPCISVNMVMAWAKADQGNGEFGKRSWRY |
| 236 | 0        | 119408545.gb  | EAW16496.1     | AhpC/TSA family protein                                      | Populus tremula                        | FGVPGAFPTCSLKHVPCISVNMVMAWAKADQGNGEFGKRSWRY |
| 237 | 1.02E-20 | 21593881.gb   | AAM65848.1     | type 2 peroxiredoxin, putative                               | Populus tremula                        | FGVPGAFPTCSLKHVPCISVNMVMAWAKADQGNGEFGKRSWRY |
| 238 | 1.08E-12 | 33863456.ref  | NP_895016.1    | Alkyl hydroperoxide reductase/ Thiol specific antioxidant/ M | Populus tremula                        | FGVPGAFPTCSLKHVPCISVNMVMAWAKADQGNGEFGKRSWRY |
| 239 | 0        | 165976910.ref | YP_001652503.1 | hybrid peroxiredoxin hyPrx5                                  | Populus tremula                        | FGVPGAFPTCSLKHVPCISVNMVMAWAKADQGNGEFGKRSWRY |
| 240 | 8.36E-13 | 68471468.ref  | XP_720282.1    | putative alkyl hydroperoxide reductase                       | Populus tremula                        | FGVPGAFPTCSLKHVPCISVNMVMAWAKADQGNGEFGKRSWRY |
| 241 | 0        | 46442382.gb   | EAL01434.1     | potential alkyl hydroperoxide reductase                      | Populus tremula                        | FGVPGAFPTCSLKHVPCISVNMVMAWAKADQGNGEFGKRSWRY |
| 242 | 8.80E-11 | 71143981.gb   | AZ24454.1      | peroxiredoxin/glutaredoxin family protein                    | Populus tremula                        | FGVPGAFPTCSLKHVPCISVNMVMAWAKADQGNGEFGKRSWRY |
| 243 | 0        | 149189165.ref | ZP_01867452.1  | peroxiredoxin family protein/glutaredoxin                    | Populus tremula                        | FGVPGAFPTCSLKHVPCISVNMVMAWAKADQGNGEFGKRSWRY |
| 244 | 7.31E-19 | 125597912.gb  | EAZ37692.1     | hypothetical protein OsJ_021175                              | Populus tremula                        | FGVPGAFPTCSLKHVPCISVNMVMAWAKADQGNGEFGKRSWRY |
| 245 | 1.66E-19 | 127514569.ref | YP_001095766.1 | Redoxin domain protein                                       | Populus tremula                        | FGVPGAFPTCSLKHVPCISVNMVMAWAKADQGNGEFGKRSWRY |
| 246 | 0        | 148825149.ref | YP_001289902.1 | hypothetical protein CGSHIEE_00105                           | Populus tremula                        | FGVPGAFPTCSLKHVPCISVNMVMAWAKADQGNGEFGKRSWRY |
| 247 | 6.71E-10 | 149235590.ref | XP_001623673.1 | hypothetical protein LELG_05089                              | Populus tremula                        | FGVPGAFPTCSLKHVPCISVNMVMAWAKADQGNGEFGKRSWRY |

|     |          |               |                |                                                                  |                                    |                                               |
|-----|----------|---------------|----------------|------------------------------------------------------------------|------------------------------------|-----------------------------------------------|
| 248 | 7.15E-21 | 146452652.gb  | EDK46908.1     | hypothetical protein LEI_G.05089                                 | Lodderomyces elongisporus NRRL YB- | FSLPGAFTPTCSTYQLPCLSVNVMNAWGWKSGSGGEFGMRSWRY  |
|     |          | 15986220.ref  | NP_386573.1    | hypothetical protein SMC01834                                    | Sinorhizobium meliloti 1021        |                                               |
|     |          | 15076490.emb  | CAC47046.1     | CONSERVED HYPOTHETICAL PROTEIN                                   | Sinorhizobium meliloti             |                                               |
| 249 | 0        | 12844914.dbj  | BAB26548.1     | unnamed protein product                                          | Mus musculus                       | FGVPGAFTPGCKYKTHLPCLSVNVIEEWGRAHGNRRLKRFGTGL  |
| 250 | 9.83E-10 | 50427407.ref  | XP_462316.1    | hypothetical protein DEHA0G19030g                                | Debaryomyces hansenii CBS767       | TAAPGAFPTCTEEHIPVVTANVAAWGWKALLGIRTARYGLGF    |
|     |          | 49657986.emb  | CAG90822.1     | unnamed protein product                                          | Debaryomyces hansenii CBS767       |                                               |
| 251 | 0        | 91227291.ref  | ZP_01267176.1  | peroxiredoxin family protein/glutaredoxin                        | Vibrio alginolyticus 12G01         | FSLPGAFTPTCSSSHLPCVSNVNMNAWVKDQDQNGEFGKRSWRY  |
|     |          | 91189685.gb   | EAS74974.1     | peroxiredoxin family protein/glutaredoxin                        | Vibrio alginolyticus 12G01         |                                               |
| 252 | 1.07E-22 | 49474607.ref  | YP_032643.1    | hypothetical protein BQ10800                                     | Bartonella quintana str. Toulouse  | FSLPGAFTPTCSTQLPCLSVNVMNAWKEAQFGMRSWRYDPYE    |
|     |          | 49240105.emb  | CAF26547.1     | hypothetical protein                                             | Bartonella quintana str. Toulouse  |                                               |
| 253 | 6.56E-18 | 69935890.ref  | ZP_00630777.1  | Alkyl hydroperoxide reductase/ Thiol specific antioxidant/ M     | Paracoccus denitrificans PD1222    | FSLPGAFTPTCSTYQLPCMSVNMVNAWAKAQFGARSWRYDPYG   |
|     |          | 119384118.ref | YP_915174.1    | Redoxin domain protein                                           | Paracoccus denitrificans PD1222    |                                               |
|     |          | 119373885.gb  | ABL69478.1     | Redoxin domain protein                                           | Paracoccus denitrificans PD1222    |                                               |
| 254 | 7.54E-16 | 157093003.gb  | ABV22156.1     | peroxiredoxin V protein                                          | Perkinsus chesapeakei              | FGVPGAFPTCDQTHLPCMAVNMVAWGWKASDITAKGNVRCKRF   |
| 255 | 4.76E-22 | 118481397.gb  | ABK92641.1     | unknown                                                          | Populus trichocarpa                | SEGEFAVPGAFPTCSQKHLPCISVNMNAWKAEDLLGVRSRRY    |
| 256 | 2.54E-20 | 114766813.ref | ZP_01445747.1  | AhpC/TSA family protein                                          | Roseovarius sp. HTCC2601           | FAVPGAFPTCHSAHVPCVSNVMNAWGEATLIARSKRYSPGE     |
|     |          | 114541007.gb  | EAU44065.1     | AhpC/TSA family protein                                          | Roseovarius sp. HTCC2601           |                                               |
| 257 | 1.99E-21 | 84356655.ref  | ZP_00981494.1  | COG0678; Peroxiredoxin                                           | Burkholderia cenocepacia PC184     | FGLPGAFTPTCSAQHVPCVSNVMGAWGRDLMGIRSLRYDGGV    |
| 258 | 3.27E-10 | 157336429.emb | CAQ71114.1     | unnamed protein product                                          | Vitis vinifera                     | DEGVPLKELFKDKFGLPGLGAYTGVCSAQHPCVA/VNLGPRSHRW |
| 259 | 1.07E-11 | 111063934.gb  | EAT85054.1     | hypothetical protein SNOG_07588                                  | Phaeosphaeria nodorum SN15         | ACGRPQEVFVPGAFTPGQAFHLPKGVVNMNAWGWKNEVSVS     |
|     |          | 0             | 74220848.dbj   | unnamed protein product                                          | Mus musculus                       | FGVPGAFTPGCKYKTHLPCLSVNVIEEWGRAHGNRRLKRFGTGL  |
| 261 | 4.50E-20 | 126729190.ref | ZP_01745004.1  | antioxidant, AhpC/Tsa family protein                             | Sagittula stellata E-37            | FSLPGAFTPTCSTYQLPCLSVNVMNAWAKAGSGEGFARSWRY    |
|     |          | 126710180.gb  | EBA09232.1     | antioxidant, AhpC/Tsa family protein                             | Sagittula stellata E-37            |                                               |
| 262 | 1.50E-11 | 19075206.ref  | NP_587706.1    | thioredoxin peroxidase                                           | Schizosaccharomyces pombe 972h-    | VGVPGAFPTPCSSQVPGVVAVNVTKAWKSFDAQFGLPSKRY     |
|     |          | 13432214.sp   | O14313         | PMP20_SCHPO Putative peroxiredoxin pmp20 (Thioredoxin reductase) | Schizosaccharomyces pombe 972h-    |                                               |
|     |          | 3646447.emb   | CAA20911.1     | thioredoxin peroxidase                                           | Schizosaccharomyces pombe          |                                               |
| 263 | 0        | 118054077.ref | ZP_01522618.1  | Redoxin                                                          | Comamonas testosteroni KF-1        | FAVPGAFPTCSEKHLPCLSVNMGAWGRDQATGLLGLRANRF     |
|     |          | 117998499.gb  | EAV12662.1     | Redoxin                                                          | Comamonas testosteroni KF-1        |                                               |
| 264 | 1.49E-10 | 45187719.ref  | NP_983942.1    | ADL154Cp                                                         | Asbya gossypii ATCC 10895          | IPGLVGPAAFPSPACSSSHVPTCVNVTKAWAESLGNDRSVRY    |
|     |          | 44982480.gb   | AA551766.1     | ADL154Cp                                                         | Asbya gossypii ATCC 10895          |                                               |
| 265 | 7.60E-21 | 134095964.ref | YP_001101039.1 | Putative alkyl hydroperoxide reductase. Putative member of       | Herminimonas arsenicoxydans        | FAVPGAFPTCSETHAPGVDECISVNMGAWGRDQLGVRSQRY     |
|     |          | 133739867.emb | CAL62918.1     | Putative alkyl hydroperoxide reductase. Putative member of       | Herminimonas arsenicoxydans        |                                               |
| 266 | 1.55E-19 | 114561403.ref | YP_748916.1    | Redoxin domain protein                                           | Shewanella frigidimarina NCIMB 400 | ATGQFAVPGAFPTCSEAHLPVCSVNMNAWKAWEAQQGVRSQRY   |
|     |          | 114332696.gb  | ABI70078.1     | Redoxin domain protein                                           | Shewanella frigidimarina NCIMB 400 |                                               |
| 267 | 4.89E-20 | 121591226.ref | ZP_01678527.1  | antioxidant, putative                                            | Vibrio cholerae 2740-80            | FAVPGAFPTCSEAHLPVCSVNMNAWKAWEAQTGNGGVRSQRY    |
|     |          | 121728765.ref | ZP_01681779.1  | antioxidant, putative                                            | Vibrio cholerae V52                |                                               |
|     |          | 147674520.ref | YP_001216912.1 | putative antioxidant                                             | Vibrio cholerae O395               |                                               |
|     |          | 153222074.ref | ZP_01952884.1  | antioxidant, putative                                            | Vibrio cholerae MAK 757            |                                               |
|     |          | 153818367.ref | ZP_01971034.1  | antioxidant, putative                                            | Vibrio cholerae NCTC 8457          |                                               |
|     |          | 121546924.gb  | EAX57075.1     | antioxidant, putative                                            | Vibrio cholerae V52                |                                               |
|     |          | 121628942.gb  | EAX61395.1     | antioxidant, putative                                            | Vibrio cholerae V52                |                                               |
|     |          | 124119171.gb  | EAY37914.1     | antioxidant, putative                                            | Vibrio cholerae MAK 757            |                                               |
|     |          | 126511114.gb  | EAZ73708.1     | antioxidant, putative                                            | Vibrio cholerae NCTC 8457          |                                               |
|     |          | 146316403.gb  | ABO20942.1     | putative antioxidant                                             | Vibrio cholerae O395               |                                               |
| 268 | 1.22E-20 | 124385055.ref | YP_001027307.1 | AhpC/TSA family protein                                          | Burkholderia mallei NCTC 10229     | GPGMFLPGAFTPTCSAQHVPCVAVNMGAWGRDLMLGIRSRRY    |
|     |          | 124293075.gb  | ABN02344.1     | AhpC/TSA family protein                                          | Burkholderia mallei NCTC 10229     |                                               |
| 269 | 2.37E-15 | 56898554.ref  | YP_168890.1    | antioxidant, AhpC/Tsa family                                     | Silicibacter pomeroyi DSS-3        | GPETFGLPGAFTRCGSMTHLPCVSNVMTAWGQSLYDRQRFF     |
|     |          | 56880291.gb   | AAV96957.1     | antioxidant, AhpC/Tsa family                                     | Silicibacter pomeroyi DSS-3        |                                               |
| 270 | 0        | 126346087.ref | XP_001373469.1 | PREDICTED: similar to hCG2016877., partial                       | Monodelphis domestica              | FGVPGAFTPGCKYKTHLPCLSVNVSEWGLSGGNRRLKRFGTGL   |
| 271 | 0        | 163858651.ref | YP_001631149.1 | putative glutaredoxin                                            | Bordetella petrii                  | FSLPGAFTPTCSSTHLPCVSNVMNEWAKDQFGKRSWRYDPFE    |
|     |          | 163260579.emb | CAP42881.1     | putative glutaredoxin                                            | Bordetella petrii                  |                                               |
| 272 | 6.84E-15 | 83953272.ref  | ZP_00961994.1  | AhpC/TSA family protein                                          | Sulfitobacter sp. NAS-14.1         | GPDGFVPGAYTPTCDSAHVPCVSNVMAAWGKSTLISRSKRY     |
|     |          | 83842240.gb   | EAP81408.1     | AhpC/TSA family protein                                          | Sulfitobacter sp. NAS-14.1         |                                               |
| 273 | 0        | 9449369.ref   | ZP_01302946.1  | alkyl hydroperoxide reductase/ Thiol specific antioxidant/ M     | Sphingomonas sp. SKA58             | FSVPGAFPTCSAKHLPCAVNMGAWGWKALSALGTRGQRFQVWE   |
|     |          | 94424115.gb   | EAT09139.1     | alkyl hydroperoxide reductase/ Thiol specific antioxidant/ M     | Sphingomonas sp. SKA58             |                                               |
| 274 | 4.03E-20 | 150423309.gb  | EDN15254.1     | antioxidant, putative                                            | Vibrio cholerae AM-19226           | FAVPGAFPTCSEAHLPVCSVNMNAWKAWEAQTGNGGVRSQRY    |
| 275 | 0        | 162449175.ref | YP_001611542.1 | putative peroxiredoxin 2 family protein/glutaredoxin             | Sorangium cellulosum 'So ce 56'    | FALPGAFTPTCSSSHVPCVSNVMNMEWCKAQNQNGEFGKRSWRY  |
|     |          | 161159757.emb | CAN91062.1     | putative peroxiredoxin 2 family protein/glutaredoxin             | Sorangium cellulosum 'So ce 56'    |                                               |

|     |          |               |                |                                                               |                                     |                                                |
|-----|----------|---------------|----------------|---------------------------------------------------------------|-------------------------------------|------------------------------------------------|
| 276 | 2.79E-11 | 130361.11     | P14293         | PMPB_CANBO Putative peroxiredoxin-B (Thioredoxin reduc        | Candida boidinii                    | EGGEVSPGAFPTPCTEQHLPVITQNLVKGWKKELLGTRSGRL     |
|     |          | 170901.gb     | AAA34358.1     | peroxisomal membrane protein (PMP20B)                         | Candida boidinii                    |                                                |
| 277 | 1.34E-20 | 148548262.ref | YP_001268364.1 | Redoxin domain protein                                        | Pseudomonas putida F1               | FALPGAFTPTCSERHVPVCSVNMVNAWGNMNGELGRRSQRY      |
|     |          | 148512320.gb  | ABQ79180.1     | Redoxin domain protein                                        | Pseudomonas putida F1               |                                                |
| 278 | 7.61E-20 | 89902545.ref  | YP_525016.1    | alkyl hydroperoxide reductase/ Thiol specific antioxidant/ MR | Rhodoferrax ferriduocens T118       | FALPGAFTPTCSAKHVPVCSVNMVNAWGAWARDGATGLMGLRSNRY |
|     |          | 89347282.gb   | ABD71488.1     | alkyl hydroperoxide reductase/ Thiol specific antioxidant/ MR | Rhodoferrax ferriduocens T118       |                                                |
| 279 | 3.90E-17 | 156052168.ref | XP_001592045.1 | hypothetical protein SS1G_07492                               | Sclerotinia sclerotiorum 1980       | GEESIGVPAAFSPTCSDSHVPVSVNMVNAWGSLSLGTNRSKRY    |
|     |          | 154705269.gb  | EDC05008.1     | hypothetical protein SS1G_07492                               | Sclerotinia sclerotiorum 1980       |                                                |
| 280 | 9.73E-15 | 67902186.ref  | XP_681349.1    | hypothetical protein AN8080.2                                 | Aspergillus nidulans FGSC A4        | DKGEFSVPGAFTPTCSVNHLPNLPELKKKVVASVMSAWGKAN     |
|     |          | 40740512.gb   | EAA59702.1     | hypothetical protein AN8080.2                                 | Aspergillus nidulans FGSC A4        |                                                |
| 281 | 0        | 116190632.ref | ZP_01480369.1  | hypothetical protein VchoM_02000393                           | Vibrio cholerae MO10                | FSLPGAFTPTCSSHLPCVSVNMVNAWKDDQNGNGEFGKRSWRY    |
|     |          | 116216129.ref | ZP_01482017.1  | hypothetical protein VchoR_02002080                           | Vibrio cholerae RC385               |                                                |
|     |          | 116219574.ref | ZP_01485052.1  | hypothetical protein VchoV5_02002351                          | Vibrio cholerae V51                 |                                                |
| 282 | 0        | 152397888.ref | YP_001342723.1 | Peroxioredoxin                                                | Mainomonas sp. MWYL1                | FSLPGAFTPTCSTSHLPCVSVNMFQWGSQFQMRSWRYDPFE      |
|     |          | 150838812.gb  | ABR72788.1     | Peroxioredoxin                                                | Mainomonas sp. MWYL1                |                                                |
| 283 | 3.02E-15 | 126274152.ref | XP_001387857.1 | putative thioredoxin peroxidase                               | Pichia stipitis CBS 6054            | IGVPGAFFSPACSSSHVPVAVNVTKAWGDALGNERSRRYGTVT    |
|     |          | 126213727.gb  | EAZ63834.1     | putative thioredoxin peroxidase                               | Pichia stipitis CBS 6054            |                                                |
| 284 | 0        | 89075200.ref  | YP_01161631.1  | Putative peroxiredoxin/glutaredoxin family protein            | Photobacterium sp. SKA34            | FSLPGAFTPTCSSHLPCVSVNMVNAWKADQNGNGEFGARSWRY    |
|     |          | 89049022.gb   | EAR54589.1     | Putative peroxiredoxin/glutaredoxin family protein            | Photobacterium sp. SKA34            |                                                |
| 285 | 3.16E-20 | 77361565.ref  | YP_341140.1    | Peroxioredoxin, AhpC/Tsa                                      | Pseudoalteromonas haloplanktis      | FAVPGAFTPTCSNAHLPCVSVNMVNAWKASQGGVRSKRYVTGL    |
|     |          | 76876476.emb  | CAI87698.1     | Peroxioredoxin, AhpC/Tsa family                               | Pseudoalteromonas haloplanktis      |                                                |
| 286 | 6.74E-14 | 85092101.ref  | XP_959227.1    | hypothetical protein NCU06880                                 | Neurospora crassa OR74A             | IGVPAAFSPACSSASHIPVSVNMVNAWKVKNENLGNDRSKRYGTAV |
|     |          | 28320630.gb   | EAA23991.1     | predicted protein                                             | Neurospora crassa OR74A             |                                                |
| 287 | 1.17E-12 | 121700080.ref | XP_001268305.1 | AhpC/TSA family protein                                       | Aspergillus clavatus NRRL 1         | VPGLVGPAAAFSPACSSSHVPVSVNVTKAWGVSLGNHRGKRY     |
|     |          | 119396447.gb  | EAW06879.1     | AhpC/TSA family protein                                       | Aspergillus clavatus NRRL 1         |                                                |
| 288 | 0        | 88858154.ref  | ZP_01132796.1  | putative peroxiredoxin/glutaredoxin family protein            | Pseudoalteromonas tunicata D2       | FSLPGAFTPTCSSHLPCVSVNMVNAWKDFGKRSWRYDPFE       |
|     |          | 88819771.gb   | EAR29584.1     | putative peroxiredoxin/glutaredoxin family protein            | Pseudoalteromonas tunicata D2       |                                                |
| 289 | 0        | 77164827.ref  | YP_343352.1    | Alkyl hydroperoxide reductase/ Thiol specific antioxidant     | Nitrosococcus oceanii ATCC 19707    | FSLPGAFTPTCSSNHLPCVSVNMFQWSRHMGNGEFGMRAWRY     |
|     |          | 76883141.gb   | ABA57822.1     | Alkyl hydroperoxide reductase/ Thiol specific antioxidant     | Nitrosococcus oceanii ATCC 19707    |                                                |
| 290 | 2.76E-21 | 161525999.ref | YP_001581011.1 | Redoxin domain protein                                        | Burkholderia multivorans ATCC 17616 | GNPAFGLPGAFTPTCSAGHVPVSVNMVNAWGAWRDLMGIRSLRY   |
|     |          | 160343428.gb  | ABX16514.1     | Redoxin domain protein                                        | Burkholderia multivorans ATCC 17616 |                                                |
| 291 | 3.57E-13 | 156843417.ref | XP_001644776.1 | hypothetical protein KpoI_1020p26                             | Vanderwaltozyma polyspora DSM       | DIGEIGLPAAFSPACSSSHVPVTVNVTKAWSESLGNERSMRY     |
|     |          | 156115426.gb  | EDQ16918.1     | hypothetical protein KpoI_1020p26                             | Vanderwaltozyma polyspora DSM       |                                                |
| 292 | 1.35E-16 | 162890664.gb  | EDQ77030.1     | predicted protein                                             | Physcomitrella patens subsp. patens | GOGLFGLPGAFTVGSQKHVPVSVNTMNAWAEKLLGPRSQRY      |
| 293 | 2.05E-20 | 53728049.ref  | YP_104087.1    | AhpC/TSA family protein                                       | Burkholderia mallei ATCC 23344      | GPMMFGLPGAFTPTCSAGHVPVAVNMVNAWGAWRDLMGIRSRRY   |
|     |          | 121598876.ref | YP_991814.1    | AhpC/TSA family protein                                       | Burkholderia mallei SAVP1           |                                                |
|     |          | 52429472.gb   | AAU50065.1     | AhpC/TSA family protein                                       | Burkholderia mallei ATCC 23344      |                                                |
|     |          | 121227686.gb  | ABM50204.1     | AhpC/TSA family protein                                       | Burkholderia mallei SAVP1           |                                                |
| 294 | 2.14E-13 | 89070937.ref  | ZP_01158166.1  | AhpC/TSA family protein                                       | Oceanicola granulosus HTCC2516      | DLGAFGLPGAFTGCTSAHVPTAVNMVNAWGVGSESTFYGRSKRY   |
|     |          | 89043487.gb   | EAR49700.1     | AhpC/TSA family protein                                       | Oceanicola granulosus HTCC2516      |                                                |
| 295 | 4.00E-21 | 85373834.ref  | YP_457896.1    | AhpC/TSA family protein                                       | Erythrobacter litoralis HTCC2594    | FAVPGAFTPTCSAKHLPVTSVNMVNAWGAQKADNGELGTRSQRY   |
|     |          | 84786917.gb   | ABC63099.1     | AhpC/TSA family protein                                       | Erythrobacter litoralis HTCC2594    |                                                |
| 296 | 2.83E-18 | 150395754.ref | YP_001326221.1 | Redoxin domain protein                                        | Sinorhizobium medicae WSM419        | GPVEFAVPGAFTPTCSLNLHLPVAVNMVNAWGAWATHSLGIRSKRY |
|     |          | 150027269.gb  | ABR59386.1     | Redoxin domain protein                                        | Sinorhizobium medicae WSM419        |                                                |
| 297 | 0        | 114321611.ref | YP_743294.1    | Glutaredoxin-family domain protein                            | Alkaliimnocola ehrlichei MLHE-1     | FSLPGAFTPTCSSHLPCVSVNMVNAWGAWRDLMGIRSRRY       |
|     |          | 114228005.gb  | ABL57804.1     | Glutaredoxin-family domain protein                            | Alkaliimnocola ehrlichei MLHE-1     |                                                |
| 298 | 8.35E-18 | 116781285.gb  | ABK22037.1     | unknown                                                       | Picea sitchensis                    | VPGLAVPGAFTPTCSQKHLPCVSVNMVNAWGENLLGVRSRRY     |
| 299 | 9.32E-13 | 70384685.ref  | XP_747849.1    | allergen Asp F3                                               | Aspergillus fumigatus A1293         | DKGEFALPGAFTPVCSARHVPVAVLVMSAWGKANEELGTRKRY    |
|     |          | 3914384.gb    | O43099         | PMP20_ASPFU Putative peroxiredoxin pmp20 (Thioredoxin         | Aspergillus fumigatus               |                                                |
|     |          | 2769700.gb    | AA895638.1     | peroxisomal-like protein                                      | Aspergillus fumigatus               |                                                |
|     |          | 66845476.gb   | EAL85811.1     | allergen Asp F3                                               | Aspergillus fumigatus A1293         |                                                |
| 300 | 2.51E-09 | 39970487.ref  | XP_366634.1    | hypothetical protein MGG_02710                                | Magnaporthe grisea 70-15            | ALKVGPTEGGVSPGAFPTCQEQHLKVMVSAWGAQKANDSGRTARY  |
|     |          | 149209947.ref | XP_001522348.1 | hypothetical protein MGCH7_ch7g455                            | Magnaporthe grisea 70-15            |                                                |
|     |          | 86196410.gb   | EAG71048.1     | hypothetical protein MGCH7_ch7g455                            | Magnaporthe grisea 70-15            |                                                |
|     |          | 145017484.gb  | EDK01847.1     | hypothetical protein MGG_02710                                | Magnaporthe grisea 70-15            |                                                |
| 301 | 0        | 51261175.gb   | AAH78771.1     | Peroxioredoxin 5                                              | Rattus norvegicus                   | FGVPGAFTPGCSKTHLPCVSVNVAEWGRAHGNRRLLKRFGTGL    |
|     |          | 149062198.gb  | EDM12621.1     | peroxiredoxin 5, isoform CRA_c                                | Rattus norvegicus                   |                                                |

|     |          |           |     |                |                                                              |                                             |                                               |
|-----|----------|-----------|-----|----------------|--------------------------------------------------------------|---------------------------------------------|-----------------------------------------------|
| 302 | 0        | 157342785 | emb | CAO65497.1     | unnamed protein product                                      | <i>Vitis vinifera</i>                       | GTLAFGVPGAFPTCSVKHVPVSVNVMKAWAKTYLGTTRSRF     |
| 303 | 0        | 74354725  | gb  | AAI03074.1     | PRDX5 protein                                                | <i>Bos taurus</i>                           | FGLPGAFPGCSKTHLPCLTVNVTTEWARAHGNHRLKRFGTGL    |
| 304 | 1.28E-18 | 159042669 | ref | YP_001631463.1 | Redoxin domain protein                                       | <i>Dinoroseobacter shibae</i> DFL 12        | FAVPGAYPTCHSAHVPCSVNVMKAWGEATDPPGSLHARSKRY    |
| 305 | 3.86E-15 | 157910429 | gb  | ABV91862.1     | Redoxin domain protein                                       | <i>Dinoroseobacter shibae</i> DFL 12        | FALPGAFTPACSDRHLPCLSVNVMHQWATSRGNEMGLRSWRY    |
| 306 | 7.31E-23 | 85704849  | ref | ZP_01035950.1  | Alkyl hydroperoxide reductase/ Thiol specific antioxidant    | <i>Roseovarius</i> sp. 217                  | DTHEISLPGAFPTCSLKHVPCISVNVKMSWANTFLGIRSKRF    |
| 307 | 8.58E-18 | 85670667  | gb  | EAQ25527.1     | Alkyl hydroperoxide reductase/ Thiol specific antioxidant    | <i>Roseovarius</i> sp. 217                  | GTLTFAPVPGAFPTCSAKHLPCLVAVNVMGAWGRDQMGVRSQRY  |
| 308 | 1.43E-20 | 70914307  | ref | XP_731797.1    | hypothetical protein PC301962.00.0                           | <i>Pleurocystis pacifica</i> SIR-1          | GLGEFSPVPGAYPTCSKEHLPCLSVNVMQAWGSEHLGVRGKRF   |
| 309 | 0        | 66502037  | emb | CAH86350.1     | hypothetical protein PC301962.00.0                           | <i>Pleurocystis pacifica</i> SIR-1          | FSLPGAFTPTCSSTHLPCLSVNVMNERAKDQNGEGFKRSWRY    |
| 310 | 0        | 99078567  | ref | YP_611825.1    | Redoxin                                                      | <i>Bordetella pertussis</i> Tohama I        | GTLAFGVPGAFPTCSLKHVPCISVNVKMSWANTFLGIRSKRF    |
| 311 | 0        | 99035705  | gb  | ABF62563.1     | Redoxin                                                      | <i>Bordetella pertussis</i> Tohama I        | GTLTFAPVPGAFPTCSAKHLPCLVAVNVMGAWGRDQMGVRSQRY  |
| 312 | 9.19E-11 | 163808133 | ref | ZP_02199853.1  | putative thioredoxin family protein                          | <i>Arachis hypogaea</i>                     | GPDGVGVPVPGAFPTACHRNHLPVTSVNVLNAWQQSLGPRSQRY  |
| 313 | 0        | 157407885 | gb  | ED073885.1     | putative thioredoxin family protein                          | <i>Methylobacterium populi</i> BJ001        | FSPVPGAFPTCSAKHLPCLVAVNVMGAWSKSAMGKRGORFAPGE  |
| 314 | 1.69E-09 | 499232398 | ref | ZP_01911707.1  | putative thioredoxin family protein                          | <i>Methylobacterium populi</i> BJ001        | VAIPGAFPTCTANHIPVLSANVQSFAFGKALDPPGAFGTRTRARY |
| 315 | 3.60E-12 | 149315838 | gb  | EDM75359.1     | putative glutaredoxin                                        | <i>SpHINGOPYXIS alaskensis</i> RB2256       | EQGEFALPGAFPTCYCSARHPVAVLVMSAWGKANEETRTRY     |
| 316 | 7.82E-19 | 33592799  | ref | NP_880443.1    | putative glutaredoxin                                        | <i>Lipomyces kononenkoae</i>                | FAVPGAFPTCHSAHVPCISGNVMKAWGEATLIGRSKRYGTCE    |
| 317 | 9.70E-12 | 33572447  | emb | CAE42015.1     | thioredoxin fold                                             | <i>Aspergillus clavatus</i> NRRL 1          | VGVPAAFGTCSKSHIPVSVNVMKAWSDQLPTGEGGMGRKRY     |
| 318 | 0        | 115187464 | gb  | ABI84254.1     | thioredoxin fold                                             | <i>Aspergillus clavatus</i> NRRL 1          | FAVPGAFPTCSAKHLPCLVAVNVMQAWGRSQMLGRLSRREYEPGE |
| 319 | 2.26E-21 | 115421919 | emb | CAJ48439.1     | putative antioxidant                                         | <i>Silicobacter</i> sp. TM1040              | FSLPGAFTPTCSTYQLPCISVNVMAWAKAQSGSGEFGMRSWRY   |
| 320 | 8.02E-14 | 163808133 | ref | ZP_02199853.1  | Redoxin domain protein                                       | <i>Silicobacter</i> sp. TM1040              | DDGVFAVPGAYTGTCHKQLPIVSVNVMINTWKRDRTLIGRSKRY  |
| 321 | 0        | 103485662 | ref | YP_615223.1    | Redoxin domain protein                                       | <i>Gibberella zeae</i> PH-1                 | TVGFEFVPGAFPTGCSKTHLPCLVAVNVMGAWKAAQGGKRSKRY  |
| 322 | 0        | 66789502  | ref | YP_244264.1    | peroxiredoxin                                                | <i>Xanthomonas campestris</i> pv.           | FAVPGAFPTGCSKTHLPCLVAVNVMGAWKAAQGGKRSKRY      |
| 323 | 1.33E-17 | 21230504  | ref | NP_636421.1    | peroxiredoxin                                                | <i>Xanthomonas campestris</i> pv.           | FSLPGAFTPTCSTYQLPCISVNVMAWAKAQSGSGEFGARSWRY   |
| 324 | 4.41E-18 | 21230504  | ref | NP_636421.1    | peroxiredoxin                                                | <i>Xanthomonas campestris</i> pv.           | FAVPGAFPTCSEAHLPCLVAVNVMKAWGEAQDTAGGGVRSQRY   |
| 325 | 5.24E-19 | 66789502  | ref | YP_244264.1    | peroxiredoxin                                                | <i>Xanthomonas campestris</i> pv.           |                                               |
| 326 | 0        | 66574834  | gb  | AAV50244.1     | peroxiredoxin                                                | <i>Xanthomonas campestris</i> pv.           |                                               |
| 327 | 0        | 118437202 | ref | ZP_01547633.1  | hypothetical protein SIAM614_11968                           | <i>Stappia aggregata</i> IAM 12614          |                                               |
| 328 | 2.42E-17 | 118437202 | ref | ZP_01547633.1  | hypothetical protein SIAM614_11968                           | <i>Stappia aggregata</i> IAM 12614          |                                               |
| 329 | 1.10E-18 | 92119187  | ref | YP_578916.1    | alkyl hydroperoxide reductase/thiol specific antioxidant/Mal | <i>Nitrobacter hamburgensis</i> X14         |                                               |
| 330 | 5.02E-21 | 91802081  | gb  | ABE64456.1     | alkyl hydroperoxide reductase/thiol specific antioxidant/Mal | <i>Nitrobacter hamburgensis</i> X14         |                                               |
| 331 | 1.60E-20 | 110756016 | ref | XP_624806.2    | PREDICTED: similar to CG7217-PB, isoform B                   | <i>Apis mellifera</i>                       |                                               |
| 332 | 0        | 20269863  | gb  | AAM18076.1     | antioxidant, AhpC/Tsa family protein                         | <i>Branchiostoma belcheri</i> tsingtaunense |                                               |
| 333 | 0        | 126737672 | ref | ZP_01753402.1  | antioxidant, AhpC/Tsa family protein                         | <i>Roseobacter</i> sp. SK209-2-6            |                                               |
| 334 | 0        | 126721065 | gb  | EBA17769.1     | antioxidant, AhpC/Tsa family protein                         | <i>Roseobacter</i> sp. SK209-2-6            |                                               |
| 335 | 0        | 149115275 | ref | ZP_01842020.1  | Redoxin domain protein                                       | <i>Shewanella baltica</i> OS223             |                                               |
| 336 | 0        | 153002707 | ref | YP_001368388.1 | Redoxin domain protein                                       | <i>Shewanella baltica</i> OS185             |                                               |
| 337 | 0        | 160877443 | ref | YP_001656759.1 | Redoxin domain protein                                       | <i>Shewanella baltica</i> OS195             |                                               |
| 338 | 0        | 146864900 | gb  | EDK50271.1     | Redoxin domain protein                                       | <i>Shewanella baltica</i> OS223             |                                               |
| 339 | 0        | 151367325 | gb  | ABS10325.1     | Redoxin domain protein                                       | <i>Shewanella baltica</i> OS185             |                                               |
| 340 | 0        | 160862965 | gb  | ABX51499.1     | Redoxin domain protein                                       | <i>Shewanella baltica</i> OS195             |                                               |
| 341 | 0        | 110678293 | ref | YP_681300.1    | antioxidant, AhpC/Tsa family, putative                       | <i>Roseobacter denitrificans</i> OCH 114    |                                               |
| 342 | 0        | 109454409 | gb  | ABG30614.1     | antioxidant, AhpC/Tsa family, putative                       | <i>Roseobacter denitrificans</i> OCH 114    |                                               |
| 343 | 0        | 166550175 | ref | XP_001603445.1 | PREDICTED: similar to peroxiredoxin 5, prdx5                 | <i>Nasonia vitripennis</i>                  |                                               |
| 344 | 0        | 149062197 | gb  | EDM12620.1     | peroxiredoxin 5, isoform CRA_b                               | <i>Rattus norvegicus</i>                    |                                               |
| 345 | 0        | 119947074 | ref | YP_944754.1    | Glutaredoxin-family domain protein                           | <i>Psychromonas ingrahamii</i> 37           |                                               |
| 346 | 0        | 119865678 | gb  | ABM05155.1     | Glutaredoxin-family domain protein                           | <i>Psychromonas ingrahamii</i> 37           |                                               |
| 347 | 0        | 88858744  | ref | ZP_01133385.1  | antioxidant, AhpC/Tsa family protein                         | <i>Pseudoalteromonas tunicata</i> D2        |                                               |
| 348 | 0        | 88818970  | gb  | EAR28784.1     | antioxidant, AhpC/Tsa family protein                         | <i>Pseudoalteromonas tunicata</i> D2        |                                               |
| 349 | 0        | 68075209  | ref | XP_679521.1    | antioxidant protein                                          | <i>Plasmodium berghei</i> strain ANKA       |                                               |
| 350 | 0        | 56500288  | emb | CAH95621.1     | antioxidant protein, putative                                | <i>Plasmodium berghei</i>                   |                                               |
| 351 | 1.60E-20 | 149203460 | ref | ZP_01880430.1  | Redoxin                                                      | <i>Roseovarius</i> sp. TM1035               |                                               |
| 352 | 0        | 149143293 | gb  | EDM31332.1     | Redoxin                                                      | <i>Roseovarius</i> sp. TM1035               |                                               |
| 353 | 1.39E-15 | 46128599  | ref | XP_388853.1    | hypothetical protein FG08677.1                               | <i>Gibberella zeae</i> PH-1                 |                                               |

|     |          |               |                |                                                                                |                                       |                                                |
|-----|----------|---------------|----------------|--------------------------------------------------------------------------------|---------------------------------------|------------------------------------------------|
| 333 | 4.90E-21 | 150397581 ref | YP_001328048.1 | Peroxioredoxin                                                                 | Sinorhizobium medicae WSM4.19         | FSLPGAFTPTCSTYQLPCVSVNVMNAWKGKSOGSGEFGMRSWRY   |
|     |          | 150029096 gb  | ABR61213.1     | Peroxioredoxin                                                                 | Sinorhizobium medicae WSM4.19         | FGVPGAFTPGCKSTHLPCLSVNVEEWEGRAHGNRRLKRFGTGL    |
| 334 | 0        | 74193815 dbj  | BAE22835.1     | unnamed protein product                                                        | Mus musculus                          | GTLEAFVPGAFTPTCSQAHPLPCLSVNVMNAWAKWYTLGTRSRRF  |
| 335 | 0        | 147781540 emb | CAN73709.1     | hypothetical protein                                                           | Vitis vinifera                        | G1NEFAVPGAFTPTCSQAHPLPCLSVNVMNAWAKWYTLGTRSRRF  |
| 336 | 9.93E-20 | 88792795 ref  | ZP_01108513.1  | antioxidant, AhpC/Tsa family protein                                           | Altermomonas macleodii 'Deep ecotype' | GTLEAFVPGAFTPTCSQAHPLPCLSVNVMNAWAKWYTLGTRSRRF  |
|     |          | 88775845 gb   | EAR07092.1     | antioxidant, AhpC/Tsa family protein                                           | Altermomonas macleodii 'Deep ecotype' | GTLEAFVPGAFTPTCSQAHPLPCLSVNVMNAWAKWYTLGTRSRRF  |
| 337 | 3.23E-22 | 15218876 ref  | NP_176772.1    | TPX2 (THIOREDOXIN-DEPENDENT PEROXIDASE 2), an Arabidopsis thaliana             | Arabidopsis thaliana                  | FGVPGAFTPTCSMSHVPFCFSVNMVMAWGWKTYGSGELGIRSRFF  |
|     |          | 75337580 sp   | Q9SRZ4         | PRX2C_ARATH Peroxioredoxin-2C (Peroxioredoxin IIC) (Thiol Arabidopsis thaliana | Arabidopsis thaliana                  | FGVPGAFTPTCSMSHVPFCFSVNMVMAWGWKTYGSGELGIRSRFF  |
|     |          | 6227021 gb    | AAF06057.1     | AC009513_13 identical to gb                                                    | Arabidopsis thaliana                  | FGVPGAFTPTCSMSHVPFCFSVNMVMAWGWKTYGSGELGIRSRFF  |
|     |          | 12083334 gb   | AAG48826.1     | AF332463_1 putative type 2 peroxiredoxin protein AF121355                      | Arabidopsis thaliana                  | FGVPGAFTPTCSMSHVPFCFSVNMVMAWGWKTYGSGELGIRSRFF  |
|     |          | 21536698 gb   | AAAM61030.1    | type 2 peroxiredoxin, putative                                                 | Arabidopsis thaliana                  | FGVPGAFTPTCSMSHVPFCFSVNMVMAWGWKTYGSGELGIRSRFF  |
|     |          | 27764988 gb   | AAO23615.1     | A11965970                                                                      | Arabidopsis thaliana                  | FGVPGAFTPTCSMSHVPFCFSVNMVMAWGWKTYGSGELGIRSRFF  |
|     |          | 110742929 dbj | BAE99360.1     | hypothetical protein                                                           | Arabidopsis thaliana                  | FGVPGAFTPTCSMSHVPFCFSVNMVMAWGWKTYGSGELGIRSRFF  |
| 338 | 8.29E-22 | 16519985 ref  | NP_444105.1    | Y4VD_RHISN Putative peroxiredoxin y4vd (Thioredoxin red Y4vd)                  | Rhizobium sp. NGR234                  | FSLPGAFTPTCSTQQLPCLSVNVMNAWKGKLSGGEFGMRSWRY    |
|     |          | 2496756 sp    | Q35212         | unknown                                                                        | Rhizobium sp.                         | FSLPGAFTPTCSTQQLPCLSVNVMNAWKGKLSGGEFGMRSWRY    |
|     |          | 1486441 emb   | CAA92419.1     | unknown                                                                        | Rhizobium sp.                         | FSLPGAFTPTCSTQQLPCLSVNVMNAWKGKLSGGEFGMRSWRY    |
|     |          | 2182672 gb    | AAB91892.1     | Y4vd                                                                           | Rhizobium sp. NGR234                  | FSLPGAFTPTCSTQQLPCLSVNVMNAWKGKLSGGEFGMRSWRY    |
| 339 | 4.01E-09 | 164634770 gb  | EDQ99091.1     | peroxiredoxin                                                                  | Laccaria bicolor S238N-H82            | IGVPGAFTTPCNHHPAETVYGGQSKRFVLSVAVTITAAKAV      |
| 340 | 0        | 148827764 ref | YP_001292517.1 | DNA-binding transcriptional regulator OxyR                                     | Haemophilus influenzae PittGG         | FSLPGAFTPTCSSSHLPVSVNVMNAWKEDENGEFGKRSWRY      |
|     |          | 148719006 gb  | ABR00134.1     | DNA-binding transcriptional regulator OxyR                                     | Haemophilus influenzae PittGG         | FSLPGAFTPTCSSSHLPVSVNVMNAWKEDENGEFGKRSWRY      |
| 341 | 0        | 55233150 gb   | AAV48533.1     | peroxiredoxin-like protein                                                     | Aedes aegypti                         | FAVPGAFTPGCKSTHLPCLSVNVMNAWKGKLSGGEFGMRSWRY    |
| 342 | 9.19E-14 | 90425550 ref  | YP_533920.1    | peroxiredoxin-like protein                                                     | Rhodopseudomonas palustris BisB18     | GFQVFAVPGAFTGCHKMHLPIVSVNVMNAWKGKLSGGEFGMRSWRY |
|     |          | 90107564 gb   | ABD89601.1     | peroxiredoxin-like protein                                                     | Rhodopseudomonas palustris BisB18     | GFQVFAVPGAFTGCHKMHLPIVSVNVMNAWKGKLSGGEFGMRSWRY |
| 343 | 2.42E-09 | 37783267 gb   | AAAP42502.1    | peroxiredoxin                                                                  | Ipomoea batatas                       | DEGVFLPGAFTVCSAQHVPCVAVNTMNGVAEKLGIJRSRHW      |
| 344 | 0        | 18654477 gb   | AAL35363.2     | AF442385_1 thioredoxin peroxidase                                              | Capsicum annuum                       | FVPGAFTPTCTKHPVGEFCVSNVMNAWAKWYTLGTRSRRY       |
| 345 | 0        | 116060641 emb | CAL57119.1     | putative thioredoxin peroxidase 1 (ISS)                                        | Ostreococcus lauri                    | LPGEFAVPGAFTPTCSNKHLPVSVNVMNAWAKWYTLGTRSRRY    |
| 346 | 2.59E-18 | 162888258 gb  | EDQ74636.1     | predicted protein                                                              | Physcomitrella patens subsp. patens   | VAVPGAFTPTCSQEHVPPVSVNMVMAWERSYLVRSRRFGAEE     |
| 347 | 7.41E-12 | 160705313 gb  | EAT189429.2    | hypothetical protein SNOG_02698                                                | Phaeosphaeria nodorum SN15            | GKGVGPAFAFSPSCSEHIPVSVNVMNAWAKWYTLGTRSRRY      |
| 348 | 5.72E-15 | 149202432 ref | ZP_01879405.1  | Alkyl hydroperoxide reductase/ Thiol specific antioxidant                      | Roseovarius sp. TM1035                | FGLPGAFTAACSESHLPCTAVNVMFQWGWKAKMGKRSWRYEPGL   |
|     |          | 149144530 gb  | EDM32561.1     | Alkyl hydroperoxide reductase/ Thiol specific antioxidant                      | Roseovarius sp. TM1035                | FGLPGAFTAACSESHLPCTAVNVMFQWGWKAKMGKRSWRYEPGL   |
| 349 | 0        | 157361539 gb  | ABV44727.1     | peroxiredoxin-like protein                                                     | Plebotomus papatasi                   | FAVPGAFTPGCKSTHLPCLSVNVMNAWKGKLSGGEFGMRSWRY    |
| 350 | 5.33E-19 | 156627935 ref | YP_001448541.1 | peroxiredoxin                                                                  | Vibrio Harvey ATCC BAA-1116           | FAVPGAFTPTCSAHLPVSVNVMNAWKGKLSGGEFGMRSWRY      |
|     |          | 156972929 gb  | ABU74314.1     | hypothetical protein VIBHAR_06423                                              | Vibrio Harvey ATCC BAA-1116           | FAVPGAFTPTCSAHLPVSVNVMNAWKGKLSGGEFGMRSWRY      |
| 351 | 2.85E-18 | 163760343 ref | ZP_02167425.1  | hypothetical protein HPDFL43_03531                                             | Hoeflea phototrophica DFL-43          | FAVPGAFTPTCHLNHLPIVSVNVMNAWKAATGAGKLVRSRKY     |
|     |          | 162282294 gb  | EDQ32583.1     | hypothetical protein HPDFL43_03531                                             | Hoeflea phototrophica DFL-43          | FAVPGAFTPTCHLNHLPIVSVNVMNAWKAATGAGKLVRSRKY     |
| 352 | 2.15E-16 | 126733960 ref | ZP_01749707.1  | antioxidant, AhpC/Tsa family, putative                                         | Roseobacter sp. CCS2                  | FGLPGAFTGTCSTAHVPCVSNVMNAWKGKLSGGEFGMRSWRY     |
|     |          | 126716826 gb  | EBA13690.1     | antioxidant, AhpC/Tsa family, putative                                         | Roseobacter sp. CCS2                  | FGLPGAFTGTCSTAHVPCVSNVMNAWKGKLSGGEFGMRSWRY     |
| 353 | 0        | 16758404 ref  | NP_446062.1    | peroxiredoxin 5 precursor                                                      | Rattus norvegicus                     | FGVPGAFTPGCKSTHLPCLSVNVTAEWGRAHGNRRLKRFGTGL    |
|     |          | 20138819 sp   | Q9R063         | PRDX5_RAT Peroxioredoxin-5, mitochondrial precursor (Prx-5)                    | Rattus norvegicus                     | FGVPGAFTPGCKSTHLPCLSVNVTAEWGRAHGNRRLKRFGTGL    |
|     |          | 6103726 gb    | AAF03751.1     | AF110732_1 antioxidant enzyme B166                                             | Rattus norvegicus                     | FGVPGAFTPGCKSTHLPCLSVNVTAEWGRAHGNRRLKRFGTGL    |
| 354 | 1.53E-23 | 49476039 ref  | YP_034080.1    | expressed protein                                                              | Bartonella henselae str. Houston-1    | FSLPGAFTPTCSTFQLPCLSVNVMNAWKAQFGMRSWRYDPYE     |
|     |          | 49238847 emb  | CAF28131.1     | expressed protein                                                              | Bartonella henselae str. Houston-1    | FSLPGAFTPTCSTFQLPCLSVNVMNAWKAQFGMRSWRYDPYE     |
| 355 | 7.74E-19 | 163732598 ref | ZP_02140043.1  | antioxidant, AhpC/Tsa family, putative                                         | Roseobacter litoralis Och 149         | FAVPGAFTPTCHSAHVPCVSNVMNAWKGKLSGGEFGMRSWRY     |
|     |          | 161393958 gb  | EDQ18282.1     | antioxidant, AhpC/Tsa family, putative                                         | Roseobacter litoralis Och 149         | FAVPGAFTPTCHSAHVPCVSNVMNAWKGKLSGGEFGMRSWRY     |
| 356 | 0        | 55670364 pdb  | 1URM           | A Chain A, Human Peroxioredoxin 5, C47s Mutant                                 | Homo sapiens                          | FGVPGAFTPGSSKTHLPCLSVNVTGEGWGRAHGNRRLKRFGTGL   |
|     |          |               |                |                                                                                |                                       | FGVPGAFTPGSSKTHLPCLSVNVTGEGWGRAHGNRRLKRFGTGL   |
| 357 | 4.77E-18 | 15964668 ref  | NP_385021.1    | HYPOTHEICAL PEROXIREDOXIN PROTEIN                                              | Sinorhizobium meliloti 1021           | GPVEFAVPGAFTPTCSLNHLPIVSVNVMNAWATHSLSGIRSKRY   |
|     |          | 15073846 emb  | CAC45487.1     | HYPOTHEICAL PEROXIREDOXIN PROTEIN                                              | Sinorhizobium meliloti                | GPVEFAVPGAFTPTCSLNHLPIVSVNVMNAWATHSLSGIRSKRY   |
| 358 | 1.29E-10 | 150863887 ref | XP_001382517.2 | hypothetical protein PICST_65232                                               | Pichia stipitis CBS 6054              | EVENNVAVPGAFTPTCTEIHPIVNAWGLNLSGFSKSGFTGI      |
|     |          | 149385143 gb  | ABN64488.2     | predicted protein                                                              | Pichia stipitis CBS 6054              | EVENNVAVPGAFTPTCTEIHPIVNAWGLNLSGFSKSGFTGI      |
| 359 | 0        | 123440531 ref | YP_001004525.1 | putative peroxiredoxin/glutaredoxin family protein                             | Yersinia enterocolitica subsp.        | FSLPGAFTPTCSSSHLPVSVNVMNAWKAQFGMRSWRY          |
|     |          | 122087492 emb | CAL10273.1     | putative peroxiredoxin/glutaredoxin family protein                             | Yersinia enterocolitica subsp.        | FSLPGAFTPTCSSSHLPVSVNVMNAWKAQFGMRSWRY          |
| 360 | 9.80E-20 | 26989419 ref  | NP_744844.1    | AhpC/TSA family protein                                                        | Pseudomonas putida KT2440             | FALPGAFTPTCSERHVPVSVNVMNAWGNLSGELGRRSORY       |
|     |          | 24984284 gb   | AAAN68308.1    | AE016465_1 AhpC/TSA family protein                                             | Pseudomonas putida KT2440             | FALPGAFTPTCSERHVPVSVNVMNAWGNLSGELGRRSORY       |
| 361 | 7.37E-19 | 126463318 ref | YP_001044432.1 | Redoxin domain protein                                                         | Rhodobacter sphaeroides ATCC 17029    | FAVPGAFTPTCHSAHVPGKGVCSVNMVMAWKGKLSGGEFGMRSWRY |
|     |          | 126104982 gb  | ABN77660.1     | thiol peroxidase (atypical 2-Cys peroxiredoxin)                                | Rhodobacter sphaeroides ATCC 17029    | FAVPGAFTPTCHSAHVPGKGVCSVNMVMAWKGKLSGGEFGMRSWRY |
| 362 | 4.14E-21 | 52424210 ref  | YP_087347.1    | AHP1 protein                                                                   | Mannheimia succiniciproducens         | FSLPGAFTPTCSSSHLPVSVNVMNAWKAQFGMRSWRY          |
|     |          | 52306262 gb   | AAU36762.1     | AHP1 protein                                                                   | Mannheimia succiniciproducens         | FSLPGAFTPTCSSSHLPVSVNVMNAWKAQFGMRSWRY          |

|     |          |           |     |                |                                                    |                                        |             |                                       |
|-----|----------|-----------|-----|----------------|----------------------------------------------------|----------------------------------------|-------------|---------------------------------------|
| 363 | 1.88E-20 | 76809917  | ref | YP_334908.1    | AhpC/TSA family protein                            | Burkholderia pseudomallei 1710b        | GPGMFGLPGAF | TPTCSAQHVPCVAVNVMGAWGRDLMGIRSR        |
|     |          | 76579370  | gb  | ABA48845.1     | AhpC/TSA family protein                            | Burkholderia pseudomallei 1710b        |             |                                       |
| 364 | 7.20E-12 | 50549203  | ref | XP_502072.1    | hypothetical protein                               | Yarrowia lipolytica                    | VGVPGAFSPAC | SAGHPVAVNVTNAWAESLQAQEGNKRSARY        |
|     |          | 49647939  | emb | CAG82392.1     | unnamed protein product                            | Yarrowia lipolytica CLIB122            |             |                                       |
| 365 | 0        | 114638295 | ref | XP_001164542.1 | PREDICTED: peroxiredoxin 5 isoform 3               | Pan troglodytes                        | ALRRSAGYAGG | FVPGAFTPGSKTHLPLCSVNVVTGEWGRAH        |
| 366 | 1.30E-10 | 154277968 | ref | XP_001539813.1 | predicted protein                                  | Ajiellomyces capsulatus NAm1           | GKGLIGSPGAF | SPACSAAYVPVSVNVVTGAWSKVIGNHRSKRY      |
|     |          | 150413398 | gb  | EDN08781.1     | predicted protein                                  | Ajiellomyces capsulatus NAm1           |             |                                       |
| 367 | 1.83E-21 | 124871189 | gb  | EAY62905.1     | Alkyl hydroperoxide reductase                      | Burkholderia cenocepacia PC184         | FGLPGAF     | TPTCSAQHVPCVSNVMGAWGRDLMGIRSLRYDGGV   |
| 368 | 2.08E-19 | 87120723  | ref | XP_01076616.1  | antioxidant, AhpC/Tsa family protein               | Marinomonas sp. MED121                 | FALPGAF     | TPTCSASHVPCLSVNVMHAWGEAQFGMRSSRYEPGE  |
|     |          | 86163951  | gb  | EAO65223.1     | antioxidant, AhpC/Tsa family protein               | Marinomonas sp. MED121                 |             |                                       |
| 369 | 6.33E-15 | 66808689  | ref | XP_638067.1    | hypothetical protein DDBDRAFT_0218719              | Dictyostellium discoideum AX4          | FAVPGAF     | TPTCSAKHLPCLATNMSAWGKDVGTAVGEDRSQRY   |
|     |          | 60466656  | gb  | EAL64708.1     | peroxiredoxin                                      | Dictyostellium discoideum AX4          |             |                                       |
| 370 | 0        | 118032125 | ref | XP_01503576.1  | Redoxin                                            | Burkholderia phymatum STM815           | FGLPGAF     | TPTCSARHLPVSNVMNAWGRQMQGIRSHRYAPGE    |
|     |          | 117982214 | gb  | EAU96601.1     | Redoxin                                            | Burkholderia phymatum STM815           |             |                                       |
| 371 | 8.80E-21 | 116782003 | gb  | ABK22332.1     | unknown                                            | Picea sitchensis                       | FGVPGAF     | TPTCSMQHVPKGGICISVNMKEWSKTYLGI        |
|     |          | 116785991 | gb  | ABK23933.1     | unknown                                            | Picea sitchensis                       |             |                                       |
|     |          | 116787992 | gb  | ABK24719.1     | unknown                                            | Picea sitchensis                       |             |                                       |
| 372 | 0        | 153835120 | ref | XP_01987787.1  | AhpC/TSA family/glutaredoxin domain protein        | Vibrio Harveyi HY01                    | FSLPGAF     | TPTCSSSHLPVSNVMNAWKADQNGNEFGKRSWRY    |
|     |          | 148868427 | gb  | EDL67538.1     | AhpC/TSA family/glutaredoxin domain protein        | Vibrio Harveyi HY01                    |             |                                       |
| 373 | 6.94E-19 | 121608253 | ref | YP_996060.1    | Redoxin domain protein                             | Verminephrobacter eiseniae EF01-2      | GPCGFALPGAF | TPTCSARHLPVCSVNMVCMGAWAREQLGLRSNRY    |
|     |          | 121552893 | gb  | ABM57042.1     | Redoxin domain protein                             | Verminephrobacter eiseniae EF01-2      |             |                                       |
| 374 | 1.82E-09 | 558080    | gb  | AAB41351.1     | Lipomyces kononenkoae subsp. spenceri              | Lipomyces kononenkoae subsp.           | VVAIPGAF    | TPTCTANHIPVLSANVQSAFGKALDPGAFGTRITARY |
|     |          | 1091044   | prf |                | 2020307A peroxisomal protein                       | Lipomyces kononenkoae                  |             |                                       |
| 375 | 2.38E-21 | 157346281 | emb | CAO15978.1     | unnamed protein product                            | Vitis vinifera                         | SAGEFAVPGAF | TPTCSQKHLPCISVNMVCMKAWKADLLG          |
| 376 | 0        | 14855582  | ref | YP_001263164.1 | Redoxin domain protein                             | Spingomonas Wittichii RW1              | AVGEFVPGAF  | TPTCSAKHLPCITAVNVMGAWGVSAMGVRGQRF     |
|     |          | 148500772 | gb  | ABO69026.1     | Redoxin domain protein                             | Spingomonas Wittichii RW1              |             |                                       |
| 377 | 9.33E-21 | 119475500 | ref | XP_01615853.1  | antioxidant, AhpC/Tsa family protein               | marine gamma proteobacterium           | GPQELAVPGAF | TPTGCSMTHLPLCSVNMVCMGAWGTQAQMLGRSKRY  |
|     |          | 119451703 | gb  | EAW32936.1     | antioxidant, AhpC/Tsa family protein               | marine gamma proteobacterium           |             |                                       |
| 378 | 9.95E-20 | 113972141 | ref | YP_735934.1    | Redoxin domain protein                             | Shewanella sp. MR-4                    | FAVPGAF     | TPTCEAHLPCVSNVMKAWGEAQDTAGGGVRSQRY    |
|     |          | 114049389 | ref | YP_739939.1    | Redoxin domain protein                             | Shewanella sp. MR-7                    |             |                                       |
|     |          | 117922451 | ref | YP_871643.1    | Redoxin domain protein                             | Shewanella sp. ANA-3                   |             |                                       |
|     |          | 113886825 | gb  | ABI40877.1     | Redoxin domain protein                             | Shewanella sp. MR-4                    |             |                                       |
|     |          | 113890831 | gb  | ABI44882.1     | Redoxin domain protein                             | Shewanella sp. MR-7                    |             |                                       |
|     |          | 117614783 | gb  | ABK50237.1     | Redoxin domain protein                             | Shewanella sp. ANA-3                   |             |                                       |
| 379 | 1.07E-20 | 83719595  | ref | YP_441672.1    | AhpC/TSA family protein                            | Burkholderia thailandensis E264        | GPGMFGLPGAF | TPTCSAQHVPCVAVNVMGAWGRDLMGIRSR        |
|     |          | 83653420  | gb  | ABC37483.1     | AhpC/TSA family protein                            | Burkholderia thailandensis E264        |             |                                       |
| 380 | 1.47E-12 | 50422983  | ref | XP_460069.1    | hypothetical protein DEHA0E18458g                  | Debaryomyces Hansenii CBS767           | DPLTVSVP    | GAFIPTCTANHIPVLSANVLSNAWGKLLMGIRTARY  |
|     |          | 49655737  | emb | CAG88329.1     | unnamed protein product                            | Debaryomyces Hansenii CBS767           |             |                                       |
| 381 | 0        | 16124048  | ref | NP_407361.1    | putative peroxiredoxin/glutaredoxin family protein | Yersinia pestis CO92                   | FSLPGAF     | TPTCSSSHLPVSNVMNAWKSDQNGNEFGPR        |
|     |          | 22124236  | ref | NP_667659.1    | peroxiredoxin family protein                       | Yersinia pestis KIM                    |             |                                       |
|     |          | 45442886  | ref | NP_994425.1    | putative peroxiredoxin/glutaredoxin family protein | Yersinia pestis biovar Microtus str.   |             |                                       |
|     |          | 51594477  | ref | YP_088668.1    | putative peroxiredoxin/glutaredoxin family protein | Yersinia pseudotuberculosis IP_32953   |             |                                       |
|     |          | 108806104 | ref | YP_650020.1    | putative peroxiredoxin/glutaredoxin family protein | Yersinia pestis Antiqua                |             |                                       |
|     |          | 108810217 | ref | YP_645984.1    | peroxiredoxin/glutaredoxin family protein          | Yersinia pestis Nepal516               |             |                                       |
|     |          | 145600775 | ref | YP_001164851.1 | peroxiredoxin/glutaredoxin family protein          | Yersinia pestis Pestoides F            |             |                                       |
|     |          | 150261121 | ref | XP_01917849.1  | putative peroxiredoxin/glutaredoxin family protein | Yersinia pestis CA88-4125              |             |                                       |
|     |          | 153949361 | ref | YP_001399136.1 | hybrid peroxiredoxin hyPrx5                        | Yersinia pseudotuberculosis IP_31758   |             |                                       |
|     |          | 162419256 | ref | YP_001604753.1 | hybrid peroxiredoxin hyPrx5                        | Yersinia pestis Angola                 |             |                                       |
|     |          | 165928382 | ref | XP_02224214.1  | hybrid peroxiredoxin hyPrx5                        | Yersinia pestis biovar Orientalis str. |             |                                       |
|     |          | 165936984 | ref | XP_02225550.1  | hybrid peroxiredoxin hyPrx5                        | Yersinia pestis biovar Orientalis str. |             |                                       |
|     |          | 166009504 | ref | XP_02230402.1  | hybrid peroxiredoxin hyPrx5                        | Yersinia pestis biovar Antiqua str.    |             |                                       |
|     |          | 21957000  | gb  | AAM83910.1     | AE013631_6 peroxiredoxin family protein            | Yersinia pestis KIM                    |             |                                       |
|     |          | 45437753  | gb  | AAS63302.1     | putative peroxiredoxin/glutaredoxin family protein | Yersinia pestis biovar Microtus str.   |             |                                       |
|     |          | 51587759  | emb | CAH19359.1     | putative peroxiredoxin/glutaredoxin family protein | Yersinia pseudotuberculosis IP_32953   |             |                                       |
|     |          | 108773865 | gb  | ABG16384.1     | peroxiredoxin/glutaredoxin family protein          | Yersinia pestis Nepal516               |             |                                       |
|     |          | 108778017 | gb  | ABG12075.1     | putative peroxiredoxin/glutaredoxin family protein | Yersinia pestis Antiqua                |             |                                       |
|     |          | 115349527 | emb | CAL22501.1     | putative peroxiredoxin/glutaredoxin family protein | Yersinia pestis CO92                   |             |                                       |

|     |          |               |                |                                                             |                                        |                                           |
|-----|----------|---------------|----------------|-------------------------------------------------------------|----------------------------------------|-------------------------------------------|
|     |          | 145212471.gb  | ABP41878.1     | peroxiredoxin/glutaredoxin family protein                   | Yersinia pestis Pestoides F            | GPKEFALPGAYTGCTTAAHPCLSVNMAAWGKDTLIDRSKRY |
|     |          | 149290529.gb  | EDM40606.1     | putative peroxiredoxin/glutaredoxin family protein          | Yersinia pestis CA88-4125              |                                           |
|     |          | 152960856.gb  | ABS48317.1     | hybrid peroxiredoxin hyPrx5                                 | Yersinia pseudotuberculosis IP_31758   |                                           |
|     |          | 162352071.gb  | ABX86019.1     | hybrid peroxiredoxin hyPrx5                                 | Yersinia pestis Angola                 |                                           |
|     |          | 165915226.gb  | EDR33837.1     | hybrid peroxiredoxin hyPrx5                                 | Yersinia pestis biovar Orientalis str. |                                           |
|     |          | 165919612.gb  | EDR36845.1     | hybrid peroxiredoxin hyPrx5                                 | Yersinia pestis biovar Orientalis str. |                                           |
|     |          | 165991426.gb  | EDR43727.1     | hybrid peroxiredoxin hyPrx5                                 | Yersinia pestis biovar Anticapa str.   |                                           |
| 382 | 4.00E-16 | 84500432.ref  | ZP_00998681.1  | AhpC/TSA family protein                                     | Oceanicola balsensis HTCC2597          |                                           |
|     |          | 84391385.gb   | EA003717.1     | AhpC/TSA family protein                                     | Oceanicola balsensis HTCC2597          |                                           |
| 383 | 0        | 163915087.ref | NP_001106525.1 | hypothetical protein LOC100127718                           | Xenopus tropicalis                     |                                           |
|     |          | 159155852.gb  | AAI54897.1     | Unknown (protein for MGC:180760)                            | Xenopus tropicalis                     |                                           |
| 384 | 0        | 78046726.ref  | YP_362901.1    | putative peroxiredoxin                                      | Xanthomonas campestris pv.             |                                           |
|     |          | 78035156.emb  | CAJ22801.1     | putative peroxiredoxin                                      | Xanthomonas campestris pv.             |                                           |
| 385 | 0        | 20139172.sp   | Q9GLW9         | PRDX5_PAPHA Peroxiredoxin-5, mitochondrial precursor (F)    | Papio hamadryas                        |                                           |
|     |          | 10305534.gb   | AAG13451.2     | AF110734_1 peroxiredoxin 5                                  | Papio hamadryas                        |                                           |
| 386 | 0        | 125848532.ref | XP_001342353.1 | PREDICTED: hypothetical protein isoform 2                   | Danio rerio                            |                                           |
| 387 | 1.53E-21 | 120609051.ref | YP_968729.1    | Redoxin domain protein                                      | Acidovorax avenae subsp. citrulli      |                                           |
|     |          | 120587515.gb  | ABM30955.1     | Redoxin domain protein                                      | Acidovorax avenae subsp. citrulli      |                                           |
| 388 | 1.92E-13 | 149244744.ref | XP_001526915.1 | conserved hypothetical protein                              | Lodderomyces elongisporus NRRL YB-     |                                           |
|     |          | 146449309.gb  | EDK43565.1     | conserved hypothetical protein                              | Lodderomyces elongisporus NRRL YB-     |                                           |
| 389 | 3.05E-18 | 77463335.ref  | YP_352839.1    | peroxiredoxin/glutaredoxin family protein                   | Rhodobacter sphaeroides 2.4.1          |                                           |
|     |          | 126462191.ref | YP_001043305.1 | Redoxin domain protein                                      | Rhodobacter sphaeroides ATCC_17029     |                                           |
|     |          | 77387753.gb   | ABA78938.1     | peroxiredoxin/glutaredoxin family protein                   | Rhodobacter sphaeroides 2.4.1          |                                           |
|     |          | 126103855.gb  | ABN76533.1     | Redoxin domain protein                                      | Rhodobacter sphaeroides ATCC_17029     |                                           |
| 390 | 0        | 42830019.ref  | ZP_00155564.1  | COG0678: Peroxiredoxin                                      | Haemophilus influenzae R2846           |                                           |
|     |          | 145633472.ref | ZP_01789201.1  | hypothetical protein CGS_H13655_05114                       | Haemophilus influenzae 3655            |                                           |
|     |          | 145837932.ref | ZP_01793574.1  | DNA-binding transcriptional regulator OxyR                  | Haemophilus influenzae PttHH           |                                           |
|     |          | 144985841.gb  | EDJ92449.1     | hypothetical protein CGS_H13655_05114                       | Haemophilus influenzae 3655            |                                           |
|     |          | 145268872.gb  | EDK08833.1     | DNA-binding transcriptional regulator OxyR                  | Haemophilus influenzae PttHH           |                                           |
| 391 | 0        | 114320380.ref | YP_742063.1    | Glutaredoxin-family domain protein                          | Alkallimnicola ehrlichei MLHE-1        |                                           |
|     |          | 114226774.gb  | ABI56573.1     | Glutaredoxin-family domain protein                          | Alkallimnicola ehrlichei MLHE-1        |                                           |
| 392 | 4.01E-18 | 55792575.gb   | AAV65381.1     | peroxiredoxin                                               | Prototheca wickerhamii                 |                                           |
| 393 | 3.68E-16 | 118590734.ref | ZP_01548135.1  | probable peroxiredoxin protein                              | Stappia aggregata IAM_12614            |                                           |
|     |          | 118436710.gb  | EAV43350.1     | probable peroxiredoxin protein                              | Stappia aggregata IAM_12614            |                                           |
| 394 | 1.69E-17 | 33595793.ref  | NP_883436.1    | AhpC/TSA-family protein                                     | Bordetella parapertussis 12822         |                                           |
|     |          | 33565872.emb  | CAE36419.1     | AhpC/TSA-family protein                                     | Bordetella parapertussis               |                                           |
| 395 | 0        | 75911177.ref  | YP_325473.1    | Glutaredoxin-like region                                    | Anabaena variabilis ATCC_29413         |                                           |
|     |          | 75704902.gb   | ABA24578.1     | Glutaredoxin-like region                                    | Anabaena variabilis ATCC_29413         |                                           |
| 396 | 0        | 53802780.ref  | YP_112582.1    | antioxidant, AhpC/Tsa family                                | Methylococcus capsulatus str. Bath     |                                           |
|     |          | 53756541.gb   | AAU90832.1     | antioxidant, AhpC/Tsa family                                | Methylococcus capsulatus str. Bath     |                                           |
| 397 | 6.74E-22 | 52851172.emb  | CAH58634.1     | thioredoxin-dependent peroxidase                            | Plantago major                         |                                           |
| 398 | 4.00E-17 | 88798533.ref  | ZP_01114117.1  | antioxidant, putative                                       | Reinekea sp. MED297                    |                                           |
|     |          | 88778633.gb   | EAR09824.1     | antioxidant, putative                                       | Reinekea sp. MED297                    |                                           |
| 399 | 0        | 116183622.ref | ZP_01473602.1  | hypothetical protein Vex2w_020003826                        | Vibrio sp. Ex25                        |                                           |
| 400 | 6.36E-19 | 77464478.ref  | YP_353982.1    | AhpC/TSA family protein                                     | Rhodobacter sphaeroides 2.4.1          |                                           |
|     |          | 77388896.gb   | ABA80081.1     | thiol peroxidase (atypical 2-Cys peroxiredoxin)             | Rhodobacter sphaeroides 2.4.1          |                                           |
| 401 | 2.28E-10 | 69936157.ref  | ZP_00631017.1  | Alky hydroperoxide reductase/ Thiol specific antioxidant/ M | Paracoccus denitrificans PD1222        |                                           |
| 402 | 2.98E-22 | 30841938.gb   | AAAP34571.1    | thioredoxin peroxidase 1                                    | Lyopersicon esculentum                 |                                           |
| 404 | 0        | 119505297.ref | ZP_01627372.1  | membrane protein                                            | marine gamma proteobacterium           |                                           |
|     |          | 119458988.gb  | EAV40088.1     | membrane protein                                            | marine gamma proteobacterium           |                                           |
| 405 | 2.19E-25 | 119504215.ref | ZP_01626295.1  | AhpC/TSA family protein                                     | marine gamma proteobacterium           |                                           |
|     |          | 119459723.gb  | EAW40818.1     | AhpC/TSA family protein                                     | marine gamma proteobacterium           |                                           |
| 406 | 2.58E-21 | 134294653.ref | YP_001118388.1 | Redoxin domain protein                                      | Burkholderia vietnamiensis G4          |                                           |
|     |          | 134137810.gb  | ABO53553.1     | Redoxin domain protein                                      | Burkholderia vietnamiensis G4          |                                           |
| 407 | 5.80E-15 | 126740843.ref | ZP_01756528.1  | AhpC/TSA family protein                                     | Roseobacter sp. SK209-2-6              |                                           |
|     |          | 126718139.gb  | EBA14856.1     | AhpC/TSA family protein                                     | Roseobacter sp. SK209-2-6              |                                           |
| 408 | 3.79E-19 | 114570772.ref | YP_757452.1    | Redoxin domain protein                                      | Maricaulis maris MCS10                 |                                           |
|     |          | 114341234.gb  | ABI66514.1     | Redoxin domain protein                                      | Maricaulis maris MCS10                 |                                           |



|     |          |           |     |                |                                                                                                    |                                    |                                               |
|-----|----------|-----------|-----|----------------|----------------------------------------------------------------------------------------------------|------------------------------------|-----------------------------------------------|
| 409 | 5.63E-11 | 83859284  | ref | ZP_00952805.1  | Alkyl hydroperoxide reductase/ Thiol specific antioxidant/ M                                       | Oceanicaulis alexandrii HTCC2633   | DYVYIGVPGAFPTICTKRHLPAKQSGFDQCIVSNMGERSKRY    |
|     |          | 83852731  | gb  | EAP90584.1     | Alkyl hydroperoxide reductase/ Thiol specific antioxidant/ M                                       | Oceanicaulis alexandrii HTCC2633   |                                               |
| 410 | 4.26E-12 | 67903410  | ref | XP_681961.1    | PM20_ASPU PROBABLE PEROXISOMAL MEMBRANE                                                            | Aspergillus nidulans FGSC A4       | EKGEFALPGAFTPVCSARHVPVAVLVMSAWGKANECEGRTKRY   |
| 411 | 1.31E-19 | 40741051  | gb  | EA460241.1     | PM20_ASPU PROBABLE PEROXISOMAL MEMBRANE                                                            | Aspergillus nidulans FGSC A4       | FSLPGAFPTCSTYQLPCLSVNVMNAWAKGQSGGEGFMRSWRY    |
|     |          | 159185196 | ref | NP_355351.2    | hypothetical protein Au2399                                                                        | Agrobacterium tumefaciens str. C58 |                                               |
|     |          | 159140462 | gb  | AAK88136.2     | conserved hypothetical protein                                                                     | Agrobacterium tumefaciens str. C58 |                                               |
| 412 | 0        | 16272515  | ref | NP_438729.1    | peroxidorexin hybrid Prx5                                                                          | Haemophilus influenzae Rd KW20     | FSLPGAFPTCSSSHLPVSVNVMNAWKEDEGNGEFGKRSWRY     |
|     |          | 1723174   | sp  | P44758         | PRX5_HAEIN Hybrid peroxidorexin hyPrx5 (Thioredoxin red                                            | Haemophilus influenzae Rd KW20     |                                               |
|     |          | 1573561   | gb  | AAC22230.1     | membrane protein                                                                                   | Haemophilus influenzae Rd KW20     |                                               |
| 413 | 0        | 15826629  | pdb | 1HD2           | A Chain A, Monoclinic Form Of Human Peroxidorexin 5                                                | Homo sapiens                       | FGVPGAFTPGCKSTHLPCLSVNVTGEWGRAHGNRRLKRFGL     |
|     |          | 16975155  | pdb | 1H40           | B Chain B, Monoclinic Form Of Human Peroxidorexin 5                                                | Homo sapiens                       |                                               |
|     |          | 16975157  | pdb | 1H40           | A Chain A, Monoclinic Form Of Human Peroxidorexin 5                                                | Homo sapiens                       |                                               |
|     |          | 16975158  | pdb | 1H40           | B Chain B, Monoclinic Form Of Human Peroxidorexin 5                                                | Homo sapiens                       |                                               |
|     |          | 16975159  | pdb | 1H40           | C Chain C, Monoclinic Form Of Human Peroxidorexin 5                                                | Homo sapiens                       |                                               |
|     |          | 16975160  | pdb | 1H40           | D Chain D, Monoclinic Form Of Human Peroxidorexin 5                                                | Homo sapiens                       |                                               |
|     |          | 16975161  | pdb | 1H40           | E Chain E, Monoclinic Form Of Human Peroxidorexin 5                                                | Homo sapiens                       |                                               |
|     |          | 16975162  | pdb | 1H40           | F Chain F, Monoclinic Form Of Human Peroxidorexin 5                                                | Homo sapiens                       |                                               |
|     |          | 16975162  | pdb | 1H40           | G Chain G, Monoclinic Form Of Human Peroxidorexin 5                                                | Homo sapiens                       |                                               |
|     |          | 16975162  | pdb | 1H40           | H Chain H, Monoclinic Form Of Human Peroxidorexin 5                                                | Homo sapiens                       |                                               |
| 414 | 0        | 157373008 | ref | YP_001480997.1 | glutaredoxin-family domain protein                                                                 | Serratia proteamaculans 568        | FSLPGAFPTCSSSHLPVSVNVMNAWAKDQNGNGEFGPRSWRY    |
|     |          | 157324772 | gb  | ABV43869.1     | glutaredoxin-family domain protein                                                                 | Serratia proteamaculans 568        |                                               |
| 415 | 1.30E-19 | 15231718  | ref | NP_190884.1    | peroxidorexin type 2, putative                                                                     | Arabidopsis thaliana               | FAVPGAFPTCSQKHVPCISVNVMEAWRKDLGNGELGVRSRRY    |
|     |          | 143360522 | sp  | Q349U7         | PRX2E_ARATH Peroxidorexin-2E, chloroplast precursor (Peroxidorexin IIE) (Thioredoxin reductase 2E) | Arabidopsis thaliana               |                                               |
|     |          | 7529720   | emb | CAB86900.1     | peroxidorexin-like protein                                                                         | Arabidopsis thaliana               |                                               |
|     |          | 15451116  | gb  | AAK96829.1     | peroxidorexin-like protein                                                                         | Arabidopsis thaliana               |                                               |
|     |          | 18377484  | gb  | AAL66908.1     | peroxidorexin-like protein                                                                         | Arabidopsis thaliana               |                                               |
|     |          | 23297326  | gb  | AAN12942.1     | putative peroxidorexin                                                                             | Arabidopsis thaliana               |                                               |
| 416 | 7.30E-14 | 115523724 | ref | YP_780635.1    | Redoxin domain protein                                                                             | Rhodospseudomonas palustris BisA53 | GPQVFAVPGAYTGTCHKMHLPIVSVNVMGAWKRDLTGIRSHRY   |
|     |          | 115517671 | gb  | ABJ05655.1     | Redoxin domain protein                                                                             | Rhodospseudomonas palustris BisA53 |                                               |
| 417 | 3.49E-22 | 21553913  | gb  | AAM62996.1     | peroxidorexin, putative                                                                            | Arabidopsis thaliana               | FGVPGAFPTCSMSHVPCFSVNVKAWGKTYGSGELGHSRRF      |
| 418 | 3.88E-20 | 71281610  | ref | YP_266909.1    | antioxidant, AhpC/Tsa family                                                                       | Colwellia psychrotolerans 34H      | FAVPGAFPTCSAAHLPCLSVNVMNAWGESGGVRSQRVDNGE     |
|     |          | 71147350  | gb  | AAZ27823.1     | antioxidant, AhpC/Tsa family                                                                       | Colwellia psychrotolerans 34H      |                                               |
| 419 | 9.88E-13 | 116791600 | gb  | ABK26037.1     | unknown                                                                                            | Picea sitchensis                   | DEGVFLPGAFTGVCSAQHVPVSVNVVNGWAEKLLGHSORW      |
| 420 | 5.38E-14 | 50405605  | ref | XP_456439.1    | hypothetical protein DEHA0A02717g                                                                  | Debaryomyces hansenii CBS767       | SPGNIGVPGAFSPACSSSHVPIVSVNVNKAWSLLGNERSKRY    |
|     |          | 4952103   | emb | CAG84391.1     | unnamed protein product                                                                            | Debaryomyces hansenii CBS767       |                                               |
| 421 | 2.28E-21 | 115350523 | ref | YP_772362.1    | Redoxin domain protein                                                                             | Burkholderia ambifaria AMMD        | GNFAGLPGAFPTCSAQHVPVSVNVMGAWGRDLMGIRSLRY      |
|     |          | 115280511 | gb  | ABI86028.1     | Redoxin domain protein                                                                             | Burkholderia ambifaria AMMD        |                                               |
| 422 | 3.60E-14 | 34980256  | gb  | AAQ84041.1     | peroxisomal-like protein                                                                           | Paracoccidioides brasiliensis      | EKGEFSVPGAFPTSCSISHLPIVAVNVMASAWGKANMGERTARY  |
| 423 | 1.05E-11 | 5326864   | gb  | AAD42074.1     | AF144753_1 peroxisomal membrane protein                                                            | Penicillium citrinum               | NYNASKEFFALPGAFTPVCSANHPVLAYNVMASAWGKANVTGD   |
| 424 | 2.74E-21 | 163868799 | ref | YP_001610023.1 | hypothetical protein Btr_1726                                                                      | Bartonella tribocorum CIP_105476   | FSLPGAFPTCSNFQLPCLSVNVMNAWKGKEQFGMRSWRYDPYE   |
|     |          | 161018470 | emb | CAK02028.1     | conserved hypothetical protein                                                                     | Bartonella tribocorum CIP_105476   |                                               |
| 425 | 0        | 124512108 | ref | XP_001349187.1 | antioxidant protein, putative                                                                      | Plasmodium falciparum 3D7          | DTHEISLPGAFPTCS TKMIPICITNNVLKSWFKSMMGMIRPWRF |
|     |          | 23498955  | emb | CAD57033.1     | antioxidant protein, putative                                                                      | Plasmodium falciparum 3D7          |                                               |
| 426 | 0        | 149911756 | ref | ZP_01900362.1  | glutaredoxin                                                                                       | Monitella sp. PE36                 | FSLPGAFPTCSSSHLPVSVNVMNAWKDDQFGKRSWRYEPGD     |
|     |          | 149805181 | gb  | EDM65201.1     | glutaredoxin                                                                                       | Monitella sp. PE36                 |                                               |
| 427 | 0        | 16330368  | ref | NP_441096.1    | membrane protein                                                                                   | Synechocystis sp. PCC 6803         | FSLPGAFPTCSSNHLPCLSVNVMFQWGKIQINGEFGMRSWRY    |
|     |          | 3915480   | sp  | P73728         | Y1621_SYNY3 Putative peroxidorexin sll1621 (Thioredoxin reductase)                                 | Synechocystis sp. PCC 6803         |                                               |
|     |          | 1652858   | dbj | BAA17776.1     | membrane protein                                                                                   | Synechocystis sp. PCC 6803         |                                               |
| 428 | 0        | 118033544 | ref | ZP_01504987.1  | Redoxin                                                                                            | Burkholderia phymatum STM815       | QVGEFGLPGAFPTCSAKHVPVSVNVMGAWARDQMGIRSORRY    |
|     |          | 117980859 | gb  | EAU95254.1     | Redoxin                                                                                            | Burkholderia phymatum STM815       |                                               |
| 429 | 7.59E-11 | 68469050  | ref | XP_721312.1    | peroxidorexin-like protein                                                                         | Candida albicans SC5314            | V5VPGAFPTCTESHLPVLAIVNVNAWGVLDGGFGIIRNKRY     |
|     |          | 68470077  | ref | XP_720800.1    | peroxidorexin-like protein                                                                         | Candida albicans SC5314            |                                               |
|     |          | 77022828  | ref | XP_888858.1    | hypothetical protein CaJ7_0281                                                                     | Candida albicans SC5314            |                                               |
|     |          | 46442686  | gb  | EAL01973.1     | peroxidorexin-like protein                                                                         | Candida albicans SC5314            |                                               |
|     |          | 46443223  | gb  | EAL02506.1     | peroxidorexin-like protein                                                                         | Candida albicans SC5314            |                                               |
|     |          | 76573671  | dbj | BAE44755.1     | hypothetical protein                                                                               | Candida albicans                   |                                               |
| 430 | 5.10E-23 | 13474891  | ref | NP_106461.1    | peroxidorexin 2 family protein                                                                     | Mesorhizobium loti MAFF303099      | FSLPGAFPTCSTLQLPCLVSVNVMNAWKGALGSGEFGMRSWRY   |
|     |          | 14025647  | dbj | BAB52247.1     | peroxidorexin 2 family protein                                                                     | Mesorhizobium loti MAFF303099      |                                               |

|     |          |           |     |                 |                                                              |                                        |                                               |
|-----|----------|-----------|-----|-----------------|--------------------------------------------------------------|----------------------------------------|-----------------------------------------------|
| 431 | 6.08E-20 | 153826303 | ref | ZP_01977970.1   | antioxidant, putative                                        | Vibrio cholerae MZO-2                  | FAVPGAFPTTCSEAHLPVCSVNMKAWGEADTGNGGVRSQRY     |
|     |          | 153828800 | ref | ZP_01981467.1   | putative antioxidant                                         | Vibrio cholerae 623-39                 |                                               |
|     |          | 148875753 | gb  | EDL73888.1      | putative antioxidant                                         | Vibrio cholerae 623-39                 |                                               |
|     |          | 149741131 | gb  | EDM55190.1      | antioxidant, putative                                        | Vibrio cholerae MZO-2                  | FALPGAFPTTCSAKHVPCVSNVMGAWGREQMGVRSKRYAPGE    |
| 432 | 0        | 73542657  | ref | YP_297177.1     | Alkyl hydroperoxide reductase/ Thiol specific antioxidant/ M | Ralstonia eutropha JMP134              | ATGVFAVPGAFPTCSQKHLPCVSNVMRAWKESLLGVRSSRY     |
| 433 | 2.91E-20 | 72120070  | gb  | AAZ62333.1      | Alkyl hydroperoxide reductase/ Thiol specific antioxidant/ M | Ralstonia eutropha JMP134              | FSLPGAFPTCSSTHLPCVSNVMNEWAKDQNGEFGKRSWRY      |
| 434 | 0        | 125681128 | gb  | EAZ220259.1     | hypothetical protein OsJ_005542                              | Oryza sativa (japonica cultivar-group) | ATGVFAVPGAFPTCSQKHLPCVSNVMRAWKESLLGVRSSRY     |
|     |          | 33597584  | ref | NP_885227.1     | putative glutaredoxin                                        | Bordeletia parapertussis 12822         | FSLPGAFPTCSSTHLPCVSNVMNEWAKDQNGEFGKRSWRY      |
|     |          | 33574012  | emb | CAE38335.1      | putative glutaredoxin                                        | Bordeletia parapertussis               | FSLPGAFPTCSSTHLPCVSNVMNEWAKDQNGEFGKRSWRY      |
| 435 | 0        | 115423051 | emb | CA_49582.1      | putative antioxidant                                         | Bordeletia avium 197N                  | FALPGAFPTCSQKHVPCVSNVMEAWRKDLGNELGVRSSRY      |
| 436 | 1.31E-19 | 15292893  | gb  | AAK92817.1      | putative peroxiredoxin protein                               | Arabidopsis thaliana                   | GPVFAVPGAFPTTCHKHLPVCSVSNVMGAWKEKASLGVRSKRY   |
| 437 | 3.88E-19 | 154246537 | ref | YP_001417495.1  | Redoxin domain protein                                       | Xanthobacter autotrophicus Py2         | DLTVCVAVPFAFTPTCCQQHVPVMAAWGKANQGDRTKRYVTYA   |
|     |          | 154160622 | gb  | ABS67838.1      | Redoxin domain protein                                       | Xanthobacter autotrophicus Py2         |                                               |
| 438 | 9.25E-12 | 164427260 | ref | XP_964200.2     | hypothetical protein NCU03151                                | Neurospora crassa OR74A                | APGVFGLPGAYTGVCSSQHHVPCVSNLGRPSERWWTGAEVILG   |
|     |          | 38567255  | emb | CAE76545.1      | probable peroxisomal membrane protein                        | Neurospora crassa                      |                                               |
|     |          | 157071672 | gb  | EAA34964.2      | hypothetical protein NCU03151                                | Neurospora crassa OR74A                | APGVFGLPGAYTGVCSSQHHVPCVSNLGRPSERWWTGAEVILG   |
| 439 | 9.11E-11 | 18397457  | ref | NP_566268.1     | ATPRX1IF/PRX1IF (PEROXIREDOXIN IIF); antioxidant/ per        | Arabidopsis thaliana                   | APGVFGLPGAYTGVCSSQHHVPCVSNLGRPSERWWTGAEVILG   |
|     |          | 25090885  | sp  | Q9M770          | PRX2F_ARATH Peroxiredoxin-2F, mitochondrial precursor        | Arabidopsis thaliana                   |                                               |
|     |          | 15450355  | gb  | AAK96471.1      | A13g06050/F24F17_3                                           | Arabidopsis thaliana                   |                                               |
| 440 | 9.58E-11 | 20466103  | gb  | AAAM19973.1     | A13g06050/F24F17_3                                           | Arabidopsis thaliana                   |                                               |
| 441 | 0        | 34591895  | gb  | AAF66133.1      | peroxiredoxin                                                | Arabidopsis thaliana                   | APGVFGLPGAYTGVCSSQHHVPCVSNLGRPSERWWTGAEVILG   |
| 442 | 7.99E-21 | 83748773  | ref | ZP_00945788.1   | Probable peroxiredoxin                                       | Ralstonia solanacearum UW551           | GNFAVGLPGAFPTTCSARHVPVCSVNMGAWARAQMGVRSQRY    |
|     |          | 83724594  | gb  | EAP71757.1      | Probable peroxiredoxin                                       | Aspergillus niger                      | EKGFEALPGAFPTVCSARHVPVAVLVMASAWGKANEEGRTGRY   |
| 443 | 2.74E-11 | 145247318 | ref | XP_0013959908.1 | hypothetical protein An12g08570                              | Arenicola marina                       | FAVPGAFPTGCSKTHLPCMAVNMVMDAWGKAHDPGGGNNVRSKRY |
|     |          | 134080642 | emb | CAK41307.1      | unnamed protein product                                      | Nostoc sp. PCC 7120                    | FSLPGAFPTCSSTHLPCVSNVMNEWAKTQNGEFGKRSWRY      |
| 444 | 0        | 68348725  | gb  | AAV96293.1      | peroxiredoxin 5                                              | Aspergillus niger                      |                                               |
| 445 | 0        | 17229033  | ref | NP_485581.1     | peroxiredoxin 2 family protein/glutaredoxin                  | Hyacinthus orientalis                  | LAVPGAFPTCSEKHLRKAGECISVNMKAWKEDLLGVRSSRY     |
| 446 | 5.33E-20 | 42565527  | gb  | AA521026.1      | peroxiredoxin 2 family protein/glutaredoxin                  | alpha proteobacterium BAL199           | FALPGAFPTCSAKHLPGKVCVSNVMDAWGKDMGTRSKRY       |
| 447 | 0        | 163795033 | ref | ZP_02189002.1   | hypothetical protein BAL199_09158                            | alpha proteobacterium BAL199           | FALPGAFPTCSAKHLPGKVCVSNVMDAWGKDMGTRSKRY       |
|     |          | 159179852 | gb  | EDP64379.1      | hypothetical protein BAL199_09158                            | alpha proteobacterium BAL199           | FALPGAFPTCSAKHLPGKVCVSNVMDAWGKDMGTRSKRY       |
| 448 | 1.08E-19 | 24376113  | ref | NP_720156.1     | antioxidant, AhpC/Tsa family                                 | Shewanella oneidensis MR-1             | FAVPGAFPTCSEAHLPVCSVNMKAWGEADTAGGGVRSQRY      |
|     |          | 24351145  | gb  | AAAN57600.1     | antioxidant, AhpC/Tsa family                                 | Shewanella oneidensis MR-1             | FAVPGAFPTCSEAHLPVCSVNMKAWGEADTAGGGVRSQRY      |
| 449 | 0        | 119594653 | gb  | EAW74247.1      | hCG2016877_isoform CRA_c                                     | Homo sapiens                           | GPGEFVPGAFPTGCSKTHLPCVSNVVTGEWGRAHGNRLKRF     |
| 450 | 2.13E-18 | 163745376 | ref | ED_02152736.1   | antioxidant, AhpC/Tsa family, putative                       | Oceanobulbus indolifex HEL-45          | FAVPGAFPTCHSAHVPVCSVNMKAWGEATLVGRSKRYGTGE     |
|     |          | 161382194 | gb  | ED_Q006603.1    | antioxidant, AhpC/Tsa family, putative                       | Oceanobulbus indolifex HEL-45          | FAVPGAFPTCHSAHVPVCSVNMKAWGEATLVGRSKRYGTGE     |
| 451 | 2.11E-18 | 154251139 | ref | YP_001411963.1  | Redoxin domain protein                                       | Parvibaculum lavamentivorans DS-1      | KTGEFALPGAFPTCSNQHLPCVSNVMGAWKQMGVRSRY        |
|     |          | 154155089 | gb  | ABS62306.1      | Redoxin domain protein                                       | Parvibaculum lavamentivorans DS-1      | KTGEFALPGAFPTCSNQHLPCVSNVMGAWKQMGVRSRY        |
| 452 | 0        | 91785287  | ref | YP_560493.1     | Putative type 2 peroxiredoxin, AhpC/TSAfamily                | Burkholderia xenovorans LB400          | FGLPGAFPTCSAKHVPCVSNVMGAWGRDQMGVRSQRYDDGV     |
|     |          | 91689241  | gb  | ABE32441.1      | Putative type 2 peroxiredoxin, AhpC/TSAfamily                | Burkholderia xenovorans LB400          | FGLPGAFPTCSAKHVPCVSNVMGAWGRDQMGVRSQRYDDGV     |
| 453 | 1.30E-16 | 154312864 | ref | XP_001555759.1  | hypothetical protein BC1G_05133                              | Botryotinia fuckeliana B05.10          | GECSGVPAAFSPTCSDSHPVPSVNMMAWGSLSLGTNRSKRY     |
|     |          | 150849835 | gb  | EDN25028.1      | hypothetical protein BC1G_05133                              | Botryotinia fuckeliana B05.10          | GECSGVPAAFSPTCSDSHPVPSVNMMAWGSLSLGTNRSKRY     |
| 454 | 1.13E-11 | 115435844 | ref | NP_001042680.1  | Os01g0266600                                                 | Oryza sativa (japonica cultivar-group) | VGSSAAAAAAGVFGVGLPGAYTGCSQAHVPCVSNLGRSSHRW    |
|     |          | 75203325  | sp  | Q9SDD6          | PRX2F_ORYSJ Peroxiredoxin-2F, mitochondrial precursor        | Oryza sativa (japonica cultivar-group) | VGSSAAAAAAGVFGVGLPGAYTGCSQAHVPCVSNLGRSSHRW    |
|     |          | 6630684   | dbj | BAA88530.1      | putative thioredoxin peroxidase                              | Oryza sativa (japonica cultivar-group) |                                               |
|     |          | 6815076   | dbj | BAF04594.1      | putative thioredoxin peroxidase                              | Oryza sativa (japonica cultivar-group) |                                               |
|     |          | 113532211 | dbj | BAF04594.1      | putative thioredoxin peroxidase                              | Oryza sativa (japonica cultivar-group) |                                               |
| 455 | 0        | 156095183 | ref | XP_001613627.1  | peroxiredoxin, putative                                      | Plasmodium vivax Sal-1                 | ISLPGAFPTCTSKMIPCTNNVLKSWFKNMGMGRPWFDPYE      |
|     |          | 148802501 | gb  | EDL43900.1      | peroxiredoxin, putative                                      | Plasmodium vivax                       | ISLPGAFPTCTSKMIPCTNNVLKSWFKNMGMGRPWFDPYE      |
| 456 | 0        | 149461406 | ref | XP_001513863.1  | PREDICTED: similar to chromosome 6 open reading frame        | Ornithorynchus anatinus                | FGVPGAFPTGCSKTHLPCVSNVAVSEWGRANWAPRGWRFGTGL   |
| 457 | 2.62E-18 | 119469102 | ref | ZP_01612086.1   | Peroxiredoxin, AhpC/Tsa family protein                       | Alteromonadales bacterium TW-7         | FAVPGAFPTCSNAHLPCVSNVMKAWGDSQGGIRSSRYVTGL     |
|     |          | 119447354 | gb  | EAW28622.1      | Peroxiredoxin, AhpC/Tsa family protein                       | Alteromonadales bacterium TW-7         | FAVPGAFPTCSNAHLPCVSNVMKAWGDSQGGIRSSRYVTGL     |
| 458 | 0        | 87121427  | ref | ZP_01077316.1   | Alkyl hydroperoxide reductase/ Thiol specific antioxidant    | Marinomonas sp. MED121                 | FSLPGAFPTCSTSHLPCVSNVMFQWGSQFGMRSRWRYPFE      |
|     |          | 86163270  | gb  | EAG64546.1      | Alkyl hydroperoxide reductase/ Thiol specific antioxidant    | Marinomonas sp. MED121                 | FSLPGAFPTCSTSHLPCVSNVMFQWGSQFGMRSRWRYPFE      |
| 459 | 0        | 6563212   | gb  | AAF17200.1      | AF112212_1 putative peroxisomal antioxidant enzyme           | Homo sapiens                           | FGVPGAFPTGCSKTHLPCVSNVTVGEWGRAHGNRLKRFGTGL    |
|     |          | 6746355   | gb  | AAF27531.1      | AF124993_1 peroxisomal membrane protein 20                   | Homo sapiens                           | FGVPGAFPTGCSKTHLPCVSNVTVGEWGRAHGNRLKRFGTGL    |
|     |          | 6523289   | emb | CAB62210.1      | human thiol peroxidase homologous protein                    | Homo sapiens                           | FGVPGAFPTGCSKTHLPCVSNVTVGEWGRAHGNRLKRFGTGL    |

|     |          |           |     |                 |                                                              |                                      |                                                |
|-----|----------|-----------|-----|-----------------|--------------------------------------------------------------|--------------------------------------|------------------------------------------------|
| 460 | 0        | 23128019  | ref | ZP_00109876.1   | COG0678: Peroxiredoxin                                       | Nostoc punctiforme PCC 73102         | FSLPGAYTPTCSSSTHLPCLISVNMVMEWSKDDQNGEFGKRSWRY  |
| 461 | 5.50E-21 | 124896938 | gb  | EAY69818.1      | Peroxiredoxin                                                | Burkholderia dolosa AUO158           | GPDGLPGAFPTCSAQHVPCVSVNMVGMWGRDLMGIRSLRY       |
| 462 | 7.10E-20 | 119776645 | ref | YP_929385.1     | antioxidant, AhpC/Tsa family                                 | Shewanella amazonensis SB2B          | FAVPGAFPTCSAAHLPCISVNMVMAWGDQADTQAGGVRSQRY     |
| 463 | 1.74E-14 | 119769145 | gb  | ABM01716.1      | antioxidant, AhpC/Tsa family                                 | Shewanella amazonensis SB2B          | FALPGAFTPACSESHLPCMAVNMVFMQWAKSQNGEMGMRSWRY    |
| 464 | 0        | 84509686  | gb  | EAO06044.1      | alkyl hydroperoxide reductase/thiol-specific antioxidant     | Loktanella vesifoldensis SKA53       | FALPGAFTPACSESHLPCMAVNMVFMQWAKSQNGEMGMRSWRY    |
|     |          | 58580531  | ref | YP_199547.1     | peroxiredoxin                                                | Xanthomonas oryzae pv. oryzae        | FAVPGAFTPTCSAKHLPLCTAVNMVMPAWGRNPMGLRSRCYEPGE  |
|     |          | 84622490  | ref | YP_449862.1     | peroxiredoxin                                                | Xanthomonas oryzae pv. oryzae MAFF   |                                                |
|     |          | 58425125  | gb  | AAW74162.1      | peroxiredoxin                                                | Xanthomonas oryzae pv. oryzae        |                                                |
|     |          | 84366430  | dbj | BAE67588.1      | peroxiredoxin                                                | Xanthomonas oryzae pv. oryzae MAFF   |                                                |
| 465 | 3.23E-11 | 147779443 | emb | CAN74358.1      | hypothetical protein                                         | Vitis vinifera                       | RLLSAKSLDSGEFAVPGAFPTCSQKHLPVARSQRQCVYVQ       |
| 466 | 0        | 154302296 | ref | XP_0011551558.1 | hypothetical protein BC1G_09932                              | Botryotinia fuckeliana B05.10        | FSLPGAFTPTCSASHLPVMSAWGKANFLSDNDGERTGRYGRGE    |
| 467 | 7.94E-15 | 150855420 | gb  | EDN30612.1      | hypothetical protein BC1G_09932                              | Botryotinia fuckeliana B05.10        |                                                |
|     |          | 119499261 | ref | XP_001266388.1  | allergen, putative                                           | Neosartorya fischeri NRRL 181        | FSVPGAFTPTCSANHLPLVLSNVMMSAWGKANVTGDLSDPQARF   |
|     |          | 119414552 | gb  | EAW24491.1      | allergen, putative                                           | Neosartorya fischeri NRRL 181        |                                                |
| 468 | 7.57E-13 | 83764509  | dbj | BAE54653.1      | unnamed protein product                                      | Aspergillus oryzae                   | GKGVGVPAAFPACSSSHVPPVSVNMVMAWATSLGNHRSKRY      |
| 469 | 4.36E-12 | 83772610  | dbj | BAE62736.1      | unnamed protein product                                      | Aspergillus oryzae                   | FALPGAFTVCSANHPVAVLMSAWAKANEERTKRYVTYA         |
| 470 | 3.36E-14 | 68480197  | ref | XP_715909.1     | putative peroxiredoxin                                       | Candida albicans SC5314              | IGVPGAFTSPACSSASHVPVAVNVTKAWGEQLSTGAGNERSKRY   |
|     |          | 46437554  | gb  | EAK96898.1      | putential peroxiredoxin                                      | Candida albicans SC5314              |                                                |
| 471 | 1.24E-20 | 125538439 | gb  | EAY84834.1      | hypothetical protein Osl_006067                              | Oryza sativa (indica cultivar-group) | ATGVFAVPGAFTPTCSQKHLPCVSVNMVMAWAKESLLGVRSRRY   |
| 472 | 1.77E-19 | 113935292 | ref | ZP_01421190.1   | Alkyl hydroperoxide reductase/ Thiol specific antioxidant/ M | Caulobacter sp. K31                  | FAVPGAFTPTCSAKHLPCVSVNMVMAWGDQNGEMGLRSQRY      |
| 473 | 0        | 162868834 | gb  | EDQ73221.1      | predicted protein                                            | Caulobacter sp. K31                  |                                                |
| 474 | 1.86E-15 | 75676870  | ref | YP_319291.1     | alkyl hydroperoxide reductase/ Thiol specific antioxidant/ M | Physcomitrella patens subsp. patens  | GAGOFVPGAFTPTCSSKHLPCVSVNMVMAWQKSGKALGIRSRRY   |
|     |          | 74421740  | gb  | ABA05939.1      | alkyl hydroperoxide reductase/ Thiol specific antioxidant/ M | Nitrobacter winogradskyi Nb-255      | FAVPGAYTGCHKQHLPGKGVISVNMVMAWKRDTLGIKRSRY      |
| 475 | 0        | 159462450 | ref | XP_001689455.1  | alkyl hydroperoxide reductase/ Thiol specific antioxidant/ M | Nitrobacter winogradskyi Nb-255      | GEGOFVPGAFTPTCSLKHVPCVSVNMVMAWGDQNGEMGLRSRY    |
|     |          | 158283443 | gb  | EDP09193.1      | peroxiredoxin, type II                                       | Chlamydomonas reinhardtii            |                                                |
| 476 | 0        | 148234370 | ref | NP_001085580.1  | peroxiredoxin, type II                                       | Chlamydomonas reinhardtii            | FGVPGAFTPGCSKTHLPCLISVNMVSEWGWKVGHNQRCKRFGTGL  |
|     |          | 49119374  | gb  | AAH72972.1      | MGCB2521 protein                                             | Xenopus laevis                       |                                                |
| 477 | 0        | 87200020  | ref | YP_497277.1     | MGCB2521 protein                                             | Xenopus laevis                       | GPEAFSPVPGAFTPTCSAKHLPLCTAVNMVMAWGAANLGIKRGQRF |
|     |          | 87135701  | gb  | ABD26443.1      | alkyl hydroperoxide reductase/ Thiol specific antioxidant/ M | Novosphingobium aromaticovorans      | FAVPGAYTGYCTEAHLPLCIAVNMVLPAAATFHDRSKRYGTCE    |
| 478 | 6.51E-09 | 88662479  | gb  | ABD53356.1      | alkyl hydroperoxide reductase/ Thiol specific antioxidant/ M | Novosphingobium aromaticovorans      |                                                |
|     |          | 89052930  | ref | YP_508381.1     | alkyl hydroperoxide reductase/ Thiol specific antioxidant/ M | Jamaichia sp. CCS1                   | FAVPGAYTGYCTEAHLPLCIAVNMVLPAAATFHDRSKRYGTCE    |
| 479 | 1.97E-18 | 159480856 | ref | XP_001698498.1  | thiol peroxidase (atypical 2-Cys peroxiredoxin)              | Chlamydomonas reinhardtii            | LTTEFAVPGAFTPTCSQKHLPLCLISVNMVMAWQSQSILGVRSQRY |
|     |          | 158282338 | gb  | EDP07991.1      | peroxiredoxin type II                                        | Chlamydomonas reinhardtii            |                                                |
| 480 | 1.12E-21 | 121592722 | ref | YP_984618.1     | Redoxin domain protein                                       | Acidovorax sp. JS42                  | FAVPGAFTPTCSAKHVPCVSVNMVMAWGDQATGLLGLRSNRY     |
|     |          | 120604802 | gb  | ABM40542.1      | Redoxin domain protein                                       | Acidovorax sp. JS42                  |                                                |
| 481 | 0        | 89092171  | ref | ZP_01165126.1   | putative peroxiredoxin/glutaredoxin family protein           | Oceanospirillum sp. MED92            | FALPGAFTPTCSSSTHLPCLISVNMVMAWEDQNGEFGKRSWRY    |
|     |          | 89083906  | gb  | EAR63123.1      | putative peroxiredoxin/glutaredoxin family protein           | Oceanospirillum sp. MED92            | FSLPGAFTPTCSSSHLPCLISVNMVMAWAAEEGNGEFGKRSWRY   |
| 482 | 0        | 15676839  | ref | NP_273984.1     | peroxiredoxin 2 family protein/glutaredoxin                  | Neisseria meningitidis Z2491         |                                                |
|     |          | 15794087  | ref | NP_283909.1     | redoxin                                                      | Neisseria meningitidis Z2491         |                                                |
|     |          | 7226184   | gb  | AAF41352.1      | peroxiredoxin 2 family protein/glutaredoxin                  | Neisseria meningitidis MC58          |                                                |
|     |          | 121052038 | emb | CAM08347.1      | putative redoxin                                             | Neisseria meningitidis Z2491         |                                                |
| 483 | 1.04E-15 | 148252528 | ref | YP_001237113.1  | Putative peroxiredoxin                                       | Bradyrhizobium sp. BTA11             | FAVPGAFTPTCSAKHLPLCLISVNMVMAWKRDTLGIKRSRY      |
|     |          | 146404701 | gb  | ABG33207.1      | Putative peroxiredoxin                                       | Bradyrhizobium sp. BTA11             |                                                |
| 484 | 1.28E-11 | 130360    | sp  | P14292          | PMPA_CANBO Putative peroxiredoxin-A (Thioredoxin reduc       | Candida boidinii                     | GPLEVSPVPGAFTPPCTEQHLPSVNMVMAWQKGLLGTTRSGRL    |
|     |          | 170899    | gb  | AAA34357.1      | peroxisomal membrane protein (PMP20A)                        | Candida boidinii                     |                                                |
| 485 | 0        | 27807445  | ref | NP_777174.1     | peroxiredoxin 5 precursor                                    | Bos taurus                           | FGLPGAFTPGCSKTHLPCLTVNVTEEWARTHGNHRLKRFGTGL    |
|     |          | 12407851  | gb  | AAAG53661.1     | AF305564_1 peroxiredoxin 5                                   | Bos taurus                           |                                                |
| 486 | 1.03E-22 | 152997944 | ref | YP_001342779.1  | Redoxin domain protein                                       | Marinomonas sp. MWYL1                | FAVPGAFTPTCSASHLPCLISVNMVMAWGANIMGIRRRRYEPGE   |
|     |          | 150838868 | gb  | ABR72844.1      | Redoxin domain protein                                       | Marinomonas sp. MWYL1                |                                                |
| 487 | 4.66E-17 | 163741124 | ref | ZP_02148516.1   | peroxiredoxin/glutaredoxin family protein                    | Phaeobacter gallaeciensis 2.10       | FSLPGAFTPTCSTYQLPCMSVNMVMAWESQSGSEFGNRSWRY     |
|     |          | 161385477 | gb  | EDQ09854.1      | peroxiredoxin/glutaredoxin family protein                    | Phaeobacter gallaeciensis 2.10       |                                                |
| 488 | 9.72E-12 | 154294333 | ref | XP_001547608.1  | hypothetical protein BC1G_13939                              | Botryotinia fuckeliana B05.10        | KVGEIGVPAAFSPSCSNSHIPVAVNVTKAWGSLTGGPRSKRY     |
|     |          | 150844778 | gb  | EDN19971.1      | hypothetical protein BC1G_13939                              | Botryotinia fuckeliana B05.10        |                                                |
| 489 | 0        | 61664993  | gb  | AAFO4856.1      | AF197952_1 thioredoxin peroxidase PMP20                      | Homo sapiens                         | FGVPGAFTPGCSKTHLPCLISVNMVTEWGRATGNRRRLKRFGTGL  |
| 490 | 0        | 149725546 | ref | XP_001489792.1  | PREDICTED: similar to peroxiredoxin 5                        | Equus caballus                       | FGVPGAFTPGCSKTHLPCLTVNVTEEWGRATGNRRRLKRFGTGL   |

|     |          |           |     |                |                                                              |                                     |                                               |
|-----|----------|-----------|-----|----------------|--------------------------------------------------------------|-------------------------------------|-----------------------------------------------|
| 491 | 0        | 33600320  | ref | NP_887880.1    | AhpC/Tsa-family protein                                      | Bordetella bronchiseptica RB50      | GTLTFVAVPGAFPTCSAKHLPCVAVNVMGAWREGQMGVRSQRY   |
| 492 | 1.43E-19 | 33567919  | emb | CAE31832.1     | AhpC/Tsa-family protein                                      | Bordetella bronchiseptica RB50      | FSLPGAFPTCSTYQLPCLSVNVMQWAKAGSGEGFLRSWRY      |
|     |          | 7469151   | pir |                | S39907 conserved hypothetical protein 10 - Rhodobacter ca    | Rhodobacter capsulatus              | FSLPGAFPTCSSNHLPCLISVNVMFQWGRQQNGEFGMRWSRY    |
| 493 | 0        | 126654766 | ref | ZP_01726300.1  | membrane protein                                             | Cyanotheca sp. CCY0110              | FSLPGAFPTCSSNHLPCLISVNVMFQWGRQQNGEFGMRWSRY    |
|     |          | 126623501 | gb  | EAZ94205.1     | membrane protein                                             | Cyanotheca sp. CCY0110              | FSLPGAFPTCSSNHLPCLISVNVMFQWGRQQNGEFGMRWSRY    |
| 494 | 0        | 90078122  | dbj | BAE88741.1     | unnamed protein product                                      | Miaca fascicularis                  | FGVPGAFTPGCKTHLPCLSVNVTGTEWGRAHGNRRLKRFGTGL   |
| 495 | 0        | 159026585 | emb | CAO86518.1     | unnamed protein product                                      | Microcystis aeruginosa PCC.7806     | FALPGAFPTCSLHLPCLSVNVMNEWAKDQNGEFGKRSWRY      |
| 496 | 5.84E-15 | 126726172 | ref | ZP_01742014.1  | antioxidant, AhpC/Tsa family protein                         | Rhodobacteriales bacterium HTCC2150 | FGLPAGYRITCSAAHVPCSVNVMQSWGIDITFTGELIDROKRF   |
|     |          | 126706376 | gb  | EBA04467.1     | antioxidant, AhpC/Tsa family protein                         | Rhodobacteriales bacterium HTCC2150 | FAVPGAFPTCSEAHLPCLISVNVKAWGEAQDTAAGGVRSQRY    |
| 497 | 7.25E-20 | 91794888  | ref | YP_564539.1    | alkyl hydroperoxide reductase/ Thiol specific antioxidant/ M | Shewanella denitrificans OS217      | FAVPGAFPTCSEAHLPCLISVNVKAWGEAQDTAAGGVRSQRY    |
|     |          | 91716890  | gb  | ABE56816.1     | alkyl hydroperoxide reductase/ Thiol specific antioxidant/ M | Shewanella denitrificans OS217      | FAVPGAFPTCSEAHLPCLISVNVKAWGEAQDTAAGGVRSQRY    |
| 498 | 1.10E-20 | 89092553  | ref | ZP_01165606.1  | antioxidant, putative                                        | Oceanospirillum sp. MED92           | FALPGAFPTCSASHLPCLSVNVMKAWAEVQDGGAGGITRSQRY   |
|     |          | 89083065  | gb  | EAR62284.1     | antioxidant, putative                                        | Oceanospirillum sp. MED92           | FALPGAFPTCSASHLPCLSVNVMKAWAEVQDGGAGGITRSQRY   |
| 499 | 2.09E-14 | 149120868 | ref | ZP_01847309.1  | Redoxin domain protein                                       | Methylobacterium sp. 4-46           | GPVAVAVPGAFPTCHRNLPTVTSVNVLDAWAKAALGVRSKRY    |
|     |          | 148521259 | gb  | EDK94215.1     | Redoxin domain protein                                       | Methylobacterium sp. 4-46           | GPVAVAVPGAFPTCHRNLPTVTSVNVLDAWAKAALGVRSKRY    |
| 500 | 1.19E-14 | 164645618 | gb  | EDR09865.1     | peroxiredoxin                                                | Laccaria bicolor S238N-H82          | ALSTNFSVPGAFPTCHANLPLVMSGWGRFELGHRITWRFPGV    |
| 501 | 0        | 21367068  | gb  | AAM49795.1     | AF-516693_1 peroxiredoxin                                    | Pyrococcus rufa                     | KEGEFVPGAFPTGCKTHLPCLSVNVMMSAWKEHGGYRSKRY     |
| 502 | 0        | 119367465 | gb  | ABL67649.1     | putative thioredoxin-dependent peroxidase                    | Citrus cv. Shiranuhi                | GLAFVPGAFPTCSLKHVPCISVNVKAWAKFTLGRSRRF        |
| 503 | 0        | 6755114   | ref | NP_036151.1    | peroxiredoxin 5 precursor                                    | Mus musculus                        | FGVPGAFTPGCKTHLPCLSVNVIEWGRAHGNRRLKRFGTGL     |
|     |          | 20141789  | sp  | P99029         | PRDX5_MOUSE Peroxiredoxin-5, mitochondrial precursor (M      | Mus musculus                        | FSLPGAFPTCSSLQLPCCSVNTMNAWAEKMFGNRSWRYDPT     |
|     |          | 6166491   | gb  | AAF04855.1     | AF19795_1 thioredoxin peroxidase PMP20                       | Mus musculus                        | FGVPGAFTPGCKTHLPCLSVNVTEMVWGRAHGNRRLKRFDTGL   |
|     |          | 14198231  | gb  | AAH08174.1     | Peroxiredoxin 5                                              | Mus musculus                        | FGVPGAFTPGCKTHLPCLSVNVTEMVWGRAHGNRRLKRFDTGL   |
| 504 | 1.62E-11 | 148701310 | gb  | EDL33257.1     | peroxiredoxin 5, isoform CRA_b                               | Mus musculus                        | FGVPGAFTPGCKTHLPCLSVNVTEMVWGRAHGNRRLKRFDTGL   |
| 505 | 0        | 2598045   | emb | CYA05528.1     | PMP20                                                        | Schizosaccharomyces pombe           | VGVPGAFTPCCSSQVGVVAVNVTKAWKSFADAGFGLRSKRY     |
| 506 | 1.81E-18 | 77359709  | ref | YP_339284.1    | peroxiredoxin/glutaredoxin protein                           | Pseudoalteromonas haloplanktis      | FSLPGAFPTCSSTHLPCLSVNVMNAWAEHGGNGEFGKRSWRY    |
|     |          | 76874620  | emb | CAI8584.1      | putative peroxiredoxin/glutaredoxin family protein           | Pseudoalteromonas haloplanktis      | FSLPGAFPTCSSTHLPCLSVNVMNAWAEHGGNGEFGKRSWRY    |
|     |          | 83952991  | ref | ZP_00961716.1  | hypothetical protein ISM_00005                               | Roseovarius nubinihibens ISM        | FSLPGAFPTCSSLQLPCCSVNTMNAWAEKMFGNRSWRYDPT     |
|     |          | 83935620  | gb  | EAF74924.1     | hypothetical protein ISM_00005                               | Roseovarius nubinihibens ISM        | FSLPGAFPTCSSLQLPCCSVNTMNAWAEKMFGNRSWRYDPT     |
| 507 | 0        | 47523086  | ref | NP_999309.1    | peroxiredoxin 5                                              | Sus scrofa                          | FGVPGAFTPGCKTHLPCLSVNVTEMVWGRAHGNRRLKRFDTGL   |
|     |          | 10306336  | gb  | AAG13452.2     | AF110735_1 peroxiredoxin 5                                   | Sus scrofa                          | FGVPGAFTPGCKTHLPCLSVNVTEMVWGRAHGNRRLKRFDTGL   |
| 508 | 0        | 85708403  | ref | ZP_01039469.1  | AhpC/Tsa family protein                                      | Erythrobacter sp. NAP1              | TISVGFVPGAFPTCSAKHLPCVAVNVMGAWNSAAMGKRQGRF    |
|     |          | 85689937  | gb  | EAO29940.1     | AhpC/Tsa family protein                                      | Erythrobacter sp. NAP1              | TISVGFVPGAFPTCSAKHLPCVAVNVMGAWNSAAMGKRQGRF    |
| 509 | 2.31E-12 | 50553945  | ref | XP_504381.1    | hypothetical protein                                         | Yarrowia lipolytica                 | VSVPVPGAFPTCTANHIPVISANVL SAWGRALFGERTARYEPGK |
|     |          | 49650250  | emb | CAG79980.1     | unnamed protein product                                      | Yarrowia lipolytica C.LIB122        | VSVPVPGAFPTCTANHIPVISANVL SAWGRALFGERTARYEPGK |
| 510 | 6.78E-16 | 145251784 | ref | XP_001397405.1 | hypothetical protein An16g00920                              | Aspergillus niger                   | DKGEFSVPGAFPTCSINHVPVIASVNVMSAWGKANSGGRTGRF   |
|     |          | 134082942 | emb | CAK46778.1     | unnamed protein product                                      | Aspergillus niger                   | DKGEFSVPGAFPTCSINHVPVIASVNVMSAWGKANSGGRTGRF   |
| 511 | 1.77E-11 | 115386734 | ref | XP_001209908.1 | hypothetical protein ATEG_07222                              | Aspergillus terreus NIH2624         | FALPGAFTPVCSARHPVAVVAVVMSAWGKANEEGRTGRVTVYA   |
|     |          | 114190906 | gb  | EAU32606.1     | hypothetical protein ATEG_07222                              | Aspergillus terreus NIH2624         | FALPGAFTPVCSARHPVAVVAVVMSAWGKANEEGRTGRVTVYA   |
| 512 | 0        | 111608943 | gb  | ABH11029.1     | peroxiredoxin II                                             | Polymella parva                     | FGLPGAFPTCSKSHVPCISVNVKAWGDSLDQYLGLRSKRY      |
| 513 | 9.74E-17 | 148559629 | ref | YP_001258495.1 | thiol peroxidase                                             | Brucella ovis ATCC 25840            | FAVPGAFPTCSLHLPVAVNVMGAWAQSTGEGKLGVRSKRY      |
|     |          | 148370886 | gb  | ABO60865.1     | thiol peroxidase                                             | Brucella ovis ATCC 25840            | FAVPGAFPTCSLHLPVAVNVMGAWAQSTGEGKLGVRSKRY      |
| 514 | 0        | 145588361 | ref | YP_001154958.1 | Redoxin domain protein                                       | Polynucleobacter sp. QLW-P1DMWA-1   | GNAFALPGAFPTCSAKHVPCISVNVMGAWGRDQLGVRSDRY     |
|     |          | 145046767 | gb  | ABF33394.1     | Redoxin domain protein                                       | Polynucleobacter sp. QLW-P1DMWA-1   | GNAFALPGAFPTCSAKHVPCISVNVMGAWGRDQLGVRSDRY     |
| 515 | 2.44E-21 | 118701527 | ref | ZP_01559586.1  | Redoxin                                                      | Burkholderia ambifaria MC40-6       | GNAFGLPGAFPTCSAQHVPCVSNVVMGAWGRDLMGIRSLRY     |
|     |          | 118640997 | gb  | EAV47850.1     | Redoxin                                                      | Burkholderia ambifaria MC40-6       | GNAFGLPGAFPTCSAQHVPCVSNVVMGAWGRDLMGIRSLRY     |
| 516 | 0        | 56461578  | ref | YP_156689.1    | Peroxiredoxin, AhpC/Tsa family                               | Idiomarina lithiensis L2TR          | DPAEFSVPGAFPTCSEKHLPCVAVNVMKAWGESLGGIRSKRY    |
|     |          | 56180588  | gb  | AAV83310.1     | Peroxiredoxin, AhpC/Tsa family                               | Idiomarina lithiensis L2TR          | DPAEFSVPGAFPTCSEKHLPCVAVNVMKAWGESLGGIRSKRY    |
| 517 | 8.53E-18 | 158422110 | ref | YP_001523402.1 | alkyl hydroperoxide reductase                                | Azorhizobium caulinodans ORS 571    | GPVPFVAVPGAFPTCHKHNLPTVTSVNVMGAWAEQASLGLRSKRY |
|     |          | 158328999 | dbj | BAF86484.1     | alkyl hydroperoxide reductase                                | Azorhizobium caulinodans ORS 571    | GPVPFVAVPGAFPTCHKHNLPTVTSVNVMGAWAEQASLGLRSKRY |
| 518 | 7.23E-22 | 11612206  | gb  | AAG37299.1     | unknown                                                      | Sinorhizobium fredii                | FSLPGAFPTCSTQQLPCLSVNVMNAWGKALGSGEFGMRWSRY    |
| 519 | 5.59E-19 | 153886672 | ref | ZP_02009812.1  | Redoxin domain protein                                       | Ralstonia pickettii 12D             | GNAFGLPGAFPTCSARHVPVAVNVMGAWARTQMGVRSQRY      |
|     |          | 151574838 | gb  | EDN39254.1     | Redoxin domain protein                                       | Ralstonia pickettii 12D             | GNAFGLPGAFPTCSARHVPVAVNVMGAWARTQMGVRSQRY      |
| 521 | 4.79E-14 | 163737141 | ref | ZP_02144559.1  | Redoxin                                                      | Phaeobacter gallaeciensis BS107     | SVGEFVPGAFPTCHSAHVPCISVNVKAWSEATLIGRSLRY      |
|     |          | 161389745 | gb  | EDQ14096.1     | Redoxin                                                      | Phaeobacter gallaeciensis BS107     | SVGEFVPGAFPTCHSAHVPCISVNVKAWSEATLIGRSLRY      |
| 522 | 5.24E-21 | 119946480 | ref | YP_944160.1    | antioxidant, AhpC/Tsa family protein                         | Psychromonas ingrahamii 37          | FAVPGAFPTCSESHLPCLVAVNVMKAWGEAHGDDGGVRSQRY    |
|     |          | 119865084 | gb  | ABM04561.1     | antioxidant, AhpC/Tsa family protein                         | Psychromonas ingrahamii 37          | FAVPGAFPTCSESHLPCLVAVNVMKAWGEAHGDDGGVRSQRY    |

| Hit# | p-value  | gi number | db  | protein accession | Name                                                                          | Species                                    | Active Site Signature                          |
|------|----------|-----------|-----|-------------------|-------------------------------------------------------------------------------|--------------------------------------------|------------------------------------------------|
| 1    | 1.73E-23 | 145830494 | ref | ZP_01786274.1     | probable thiol peroxidase                                                     | <i>Haemophilus influenzae</i> 22.4-21      | NIIPSIDTGVCATSVHICISADAAQARFCEGIENAGVDLAGLTSRA |
|      |          | 144983884 | gb  | EDJ91326.1        | probable thiol peroxidase                                                     | <i>Haemophilus influenzae</i> R3021        |                                                |
| 2    | 0        | 16272692  | ref | NP_438910.1       | thiol peroxidase                                                              | <i>Haemophilus influenzae</i> Rd KW20      | NIIPSIDTGVCATSVRCISADAAQARFCEGIENAGVDLAGLTSRA  |
|      |          | 2501345   | sp  | Q57549            | TPX_HAEIN Probable thiol peroxidase                                           | <i>Haemophilus influenzae</i> Rd KW20      |                                                |
|      |          | 34809842  | pdb | 1Q98              | A Chain A, Structure Of A Thiol Peroxidase From <i>Haemophilus influenzae</i> | <i>Haemophilus influenzae</i> Rd KW20      |                                                |
|      |          | 34809843  | pdb | 1Q98              | B Chain B, Structure Of A Thiol Peroxidase From <i>Haemophilus influenzae</i> | <i>Haemophilus influenzae</i> Rd KW20      |                                                |
|      |          | 1573759   | gb  | AAC22410.1        | thiol peroxidase (tpx)                                                        | <i>Haemophilus influenzae</i> Rd KW20      |                                                |
| 3    | 3.25E-14 | 119775598 | ref | YP_928338.1       | antioxidant, AhpC/TSA family                                                  | <i>Shewanella amazonensis</i> SB2B         | SVTSVAVPSLDTGVCAALQTKTLSTDAQKRFCDRGLLARSVDAEGT |
|      |          | 119768098 | gb  | ABM00669.1        | antioxidant, AhpC/TSA family                                                  | <i>Shewanella amazonensis</i> SB2B         |                                                |
| 4    | 1.32E-16 | 88857868  | ref | ZP_01132510.1     | putative periplasmic thiol peroxidase                                         | <i>Pseudoalteromonas tunicata</i> D2       | ISAYANGVKSVPVSLDTGICSLQTKTISADAQKRFCDMGLLSRA   |
|      |          | 88819485  | gb  | EAR29298.1        | putative periplasmic thiol peroxidase                                         | <i>Pseudoalteromonas tunicata</i> D2       |                                                |
| 5    | 4.19E-17 | 15696549  | ref | NP_349898.1       | Thiol peroxidase, TPX                                                         | <i>Clostridium acetobutylicum</i> ATCC     | KGKEVTLAVPSVDTPVCDLEVKVTISMDAQSRWCELGILLARAKVT |
|      |          | 24212523  | sp  | Q97E14            | TPX_CLOAB Probable thiol peroxidase                                           |                                            |                                                |
|      |          | 15026384  | gb  | AAK81238.1        | AE007827_6 Thiol peroxidase, TPX                                              |                                            |                                                |
| 6    | 3.86E-21 | 71736685  | ref | YP_274830.1       | thiol peroxidase                                                              | <i>Pseudomonas syringae</i> pv.            | QVTNIFPSVDPTTCATSVRCISADAAQSRFCEGIENLVKGLTARA  |
|      |          | 71557238  | gb  | AAZ36449.1        | thiol peroxidase                                                              | <i>Pseudomonas syringae</i> pv.            |                                                |
| 7    | 1.23E-22 | 41407751  | ref | NP_960587.1       | thiol peroxidase                                                              | <i>Mycobacterium avium</i> subsp.          | NIIPSIDTGVCATSVRAGAGATNVSKDAQARFCGVTMAGLLARA   |
|      |          | 25899385  | gb  | AAL40871.1        | 20 kDa protein                                                                | <i>Mycobacterium avium</i> subsp.          |                                                |
|      |          | 41396105  | gb  | AA503970.1        | Tpx                                                                           | <i>Mycobacterium avium</i> subsp.          |                                                |
|      |          | 73698151  | gb  | AAZ81613.1        | putative thiolperoxidase                                                      | <i>Mycobacterium avium</i> subsp.          |                                                |
| 8    | 1.43E-17 | 153003735 | ref | YP_001378060.1    | Redoxin domain protein                                                        | <i>Anaeromyxobacter</i> sp. Fw109-5        | VGAKAPNIVPSLDTAVCATSTRVVSADAAKRFVTVLGLCGRA     |
|      |          | 152027308 | gb  | ABS25076.1        | Redoxin domain protein                                                        | <i>Anaeromyxobacter</i> sp. Fw109-5        |                                                |
| 9    | 0        | 160891883 | ref | ZP_02072886.1     | hypothetical protein BACUNI_04341                                             | <i>Bacteroides uniformis</i> ATCC 8492     | NIIPSLDTGVCATSVRAISKDAHARFCEGIENGVRLAGLLARS    |
|      |          | 156858361 | gb  | EDO51792.1        | hypothetical protein BACUNI_04341                                             | <i>Bacteroides uniformis</i> ATCC 8492     |                                                |
| 10   | 8.66E-22 | 51245650  | ref | YP_065534.1       | thiol peroxidase                                                              | <i>Desulfotalea psychrophila</i> L5v54     | VSLNGSLTNIIFSIDTVPVCAVMSVRCISADAHARFCLTGLLARA  |
|      |          | 50876687  | emb | CAG36527.1        | probable thiol peroxidase                                                     | <i>Desulfotalea psychrophila</i> L5v54     |                                                |
| 11   | 2.58E-13 | 149194723 | ref | ZP_01871818.1     | putative thiol peroxidase-scavengase p20 oxidoredu                            | <i>Caminibacter mediatlanticus</i> TB-2    | VVTIIVPSLDTVPVCAVETTVVSMDDAAKRFCEGIENLLRGLCARA |
|      |          | 149135146 | gb  | EDM23627.1        | putative thiol peroxidase-scavengase p20 oxidoredu                            | <i>Caminibacter mediatlanticus</i> TB-2    |                                                |
| 12   | 2.58E-12 | 116873012 | ref | YP_849793.1       | thiol peroxidase, putative                                                    | <i>Listeria welshimeri</i> serovar 6b str. | VGTERKEVTSVVVPSIDTSVCSTQTRTISVDAQKWKWCELRLARS  |
|      |          | 116741890 | emb | CAK21014.1        | unnamed protein product                                                       | <i>Listeria welshimeri</i> serovar 6b str. |                                                |
| 13   | 4.21E-16 | 113963548 | ref | YP_733341.1       | Redoxin domain protein                                                        | <i>Shewanella</i> sp. MR-4                 | TVTSAVPSLDTGVCAALQTKTISTDAQKRFCDYGLLARAIDAEGQ  |
|      |          | 114046781 | ref | YP_737331.1       | Redoxin domain protein                                                        | <i>Shewanella</i> sp. MR-7                 |                                                |
|      |          | 113884232 | gb  | ABI38284.1        | Redoxin domain protein                                                        | <i>Shewanella</i> sp. MR-4                 |                                                |
|      |          | 113888223 | gb  | ABI42274.1        | Redoxin domain protein                                                        | <i>Shewanella</i> sp. MR-7                 |                                                |
| 14   | 2.34E-18 | 149113873 | ref | ZP_01840630.1     | Redoxin domain protein                                                        | <i>Shewanella batlica</i> OS223            | TVTSAVPSLDTGVCAALQTKTISADAAQKRFCDYGLLARAIDAEGK |
|      |          | 146966624 | gb  | EDK51851.1        | Redoxin domain protein                                                        | <i>Shewanella batlica</i> OS223            |                                                |
| 15   | 9.02E-09 | 125823189 | ref | YP_001031672.1    | thiol peroxidase                                                              | <i>Lactococcus lactis</i> subsp. cremoris  | PDFELTSVFFPDINTRVCSLQTKQKNWCGVDITLADLKGRLARS   |
|      |          | 124491997 | emb | CAL96924.1        | thiol peroxidase                                                              | <i>Lactococcus lactis</i> subsp. cremoris  |                                                |
| 16   | 6.98E-19 | 149372511 | ref | ZP_01891623.1     | Peroxiredoxin                                                                 | unidentified eubacterium SCB49             | NIIPSVDTGVCAASARCISRDAQARFCEGIENGVTFDFGLHARA   |
|      |          | 149354554 | gb  | EDM43118.1        | Peroxiredoxin                                                                 | unidentified eubacterium SCB49             |                                                |
| 17   | 6.01E-14 | 77360152  | ref | YP_339727.1       | periplasmic thiol peroxidase                                                  | <i>Pseudoalteromonas haloplanktis</i>      | VSAGKGVASVPSLDTGICSLQTKTISDAQKRFCDMGLLTRA      |

|    |          |           |          |                |            |                                                                   |                                     |                                                 |
|----|----------|-----------|----------|----------------|------------|-------------------------------------------------------------------|-------------------------------------|-------------------------------------------------|
|    |          |           | 76675063 | emb            | CAI86284.1 | putative periplasmic thiol peroxidase                             | Pseudoalteromonas haloplanktis      |                                                 |
| 18 | 0        | 42543455  | pdb      | 1QXH           |            | A Chain A, Crystal Structure Of Escherichia Coli Thiol Peroxidase | Escherichia coli                    | DVTNIFPSIDTGVCAASVRCISADQAQSRFCEGLNVLKGLAARA    |
|    |          | 42543456  | pdb      | 1QXH           |            | B Chain B, Crystal Structure Of Escherichia Coli Thiol Peroxidase | Escherichia coli                    |                                                 |
| 19 | 0        | 117925430 | ref      | YP_866047.1    |            | Redoxin domain protein                                            | Magnetococcus sp. MC-1              | VLTNIFPSLDTPVCAASVRCISRDAHKRFCLAGLCARAEALAA     |
|    |          |           | gb       | ABK44641.1     |            | thiol peroxidase (atypical 2-Cys peroxiredoxin)                   | Magnetococcus sp. MC-1              |                                                 |
| 20 | 2.37E-15 | 157693338 | ref      | YP_001487800.1 |            | thiol peroxidase                                                  | Bacillus pumilus SAFR-032           | SVTSVIPSIDTGVCDAGTREEAAGLTISADAQARWCLELRLARG    |
|    |          | 157682096 | gb       | ABV63240.1     |            | thiol peroxidase                                                  | Bacillus pumilus SAFR-032           |                                                 |
| 21 | 3.63E-17 | 30022714  | ref      | NP_834345.1    |            | Thiol peroxidase                                                  | Bacillus cereus ATCC 14579          | SVVPSIDTGVCDAAQTRTISADAQKRWCVVTELRLLARAYVSEGT   |
|    |          | 49481384  | ref      | YP_038688.1    |            | thiol peroxidase                                                  | Bacillus thuringiensis serovar      |                                                 |
|    |          | 29899273  | gb       | AAP11546.1     |            | Thiol peroxidase                                                  | Bacillus cereus ATCC 14579          |                                                 |
|    |          | 49332940  | gb       | AAT163586.1    |            | thiol peroxidase                                                  | Bacillus thuringiensis serovar      |                                                 |
| 22 | 2.96E-17 | 475655054 | ref      | ZP_00236097.1  |            | thiol peroxidase                                                  | Bacillus cereus G9241               | SVVPSIDTGVCDAAQTRTISADAQKRWCVVTELRLLARAYVSEGT   |
|    |          | 47557840  | gb       | EAL16165.1     |            | thiol peroxidase                                                  | Bacillus cereus G9241               |                                                 |
| 23 | 0        | 90412880  | ref      | ZP_01220880.1  |            | tagD protein                                                      | Photobacterium profundum 3TCK       | NIFPSIDTPVCATSVRCISADATGRFCEGIEGVLRLGATRALVT    |
|    |          | 90326239  | gb       | EAS42666.1     |            | tagD protein                                                      | Photobacterium profundum 3TCK       |                                                 |
| 24 | 4.88E-17 | 55821023  | ref      | YP_139465.1    |            | thiol peroxidase                                                  | Streptococcus thermophilus LMG      | SILPSIDTGTICSTQTRTISVDAQARWCEGLNAEWHLARALVT     |
|    |          | 55822943  | ref      | YP_141384.1    |            | thiol peroxidase                                                  | Streptococcus thermophilus          |                                                 |
|    |          | 116627785 | ref      | YP_820404.1    |            | thiol peroxidase                                                  | Streptococcus thermophilus LMD-9    |                                                 |
|    |          | 55737008  | gb       | AAV60650.1     |            | thiol peroxidase                                                  | Streptococcus thermophilus LMG      |                                                 |
|    |          | 55738928  | gb       | AAV62569.1     |            | thiol peroxidase                                                  | Streptococcus thermophilus          |                                                 |
|    |          | 116101062 | gb       | ABJ66208.1     |            | thiol peroxidase (atypical 2-Cys peroxiredoxin)                   | Streptococcus thermophilus LMD-9    |                                                 |
| 25 | 9.59E-11 | 87307358  | ref      | ZP_01089503.1  |            | probable thiol peroxidase                                         | Blastopirellula marina DSM 3645     | FGPEGLSVPSVDTSCVATQTRTVSLDALNRFCELMLLARGNVT     |
|    |          | 87290098  | gb       | EAG81987.1     |            | probable thiol peroxidase                                         | Blastopirellula marina DSM 3645     |                                                 |
| 26 | 1.46E-16 | 83721283  | ref      | YP_441706.1    |            | thiol peroxidase                                                  | Burkholderia thailandensis E264     | KVTNIVPSLDTPTCATSTRVVSADAAATRFYGVNVTLDGLTARA    |
|    |          | 83655108  | gb       | ABC39171.1     |            | thiol peroxidase                                                  | Burkholderia thailandensis E264     |                                                 |
| 27 | 3.32E-13 | 157149716 | ref      | YP_001451072.1 |            | thioredoxin peroxidase                                            | Streptococcus gordonii str. Challis | SIIPSIDTGVCSQTQRTVSVDAQGWCEGENAEWHLLARATVT      |
|    |          | 1171956   | sp       | P42366         |            | TPX_STRGC Probable thiol peroxidase                               | Streptococcus gordonii str. Challis |                                                 |
|    |          | 310634    | gb       | AA71948.1      |            | 20 kDa protein                                                    | Streptococcus gordonii str. Challis |                                                 |
|    |          | 157074510 | gb       | ABY09193.1     |            | thioredoxin peroxidase                                            | Streptococcus gordonii str. Challis |                                                 |
| 28 | 2.46E-12 | 148654584 | ref      | YP_001274789.1 |            | Redoxin domain protein                                            | Roseiflexus sp. RS-1                | ERANAFVPSIDTGVCSKQTRTVSADAGRWCVGDDAALAALK       |
|    |          | 148566694 | gb       | ABQ88839.1     |            | thiol peroxidase (atypical 2-Cys peroxiredoxin)                   | Roseiflexus sp. RS-1                |                                                 |
| 29 | 1.12E-14 | 15924703  | ref      | NP_372237.1    |            | probable thiol peroxidase                                         | Staphylococcus aureus subsp.        | VTLADSVVPSIDTGVCDQQQTREGIVLTAKRWCGLDELRLARA     |
|    |          | 15927290  | ref      | NP_374823.1    |            | hypothetical protein SA1535                                       | Staphylococcus aureus subsp.        |                                                 |
|    |          | 148268192 | ref      | YP_001247135.1 |            | Redoxin domain protein                                            | Staphylococcus aureus subsp.        |                                                 |
|    |          | 150394260 | ref      | YP_001316935.1 |            | Redoxin domain protein                                            | Staphylococcus aureus subsp.        |                                                 |
|    |          | 156980030 | ref      | YP_001442289.1 |            | hypothetical protein SAHV_1699                                    | Staphylococcus aureus subsp.        |                                                 |
|    |          | 54039748  | sp       | P99146         |            | TPX_STAAN Probable thiol peroxidase                               | Staphylococcus aureus               |                                                 |
|    |          | 54042020  | sp       | P66954         |            | TPX_STAAM Probable thiol peroxidase                               | Staphylococcus aureus               |                                                 |
|    |          | 13701508  | dbj      | BAB42802.1     |            | SA1535                                                            | Staphylococcus aureus subsp.        |                                                 |
|    |          | 14247485  | dbj      | BAB57875.1     |            | probable thiol peroxidase                                         | Staphylococcus aureus subsp.        |                                                 |
|    |          | 147741261 | gb       | ABQ49559.1     |            | thiol peroxidase (atypical 2-Cys peroxiredoxin)                   | Staphylococcus aureus subsp.        |                                                 |
|    |          | 149946712 | gb       | ABR52648.1     |            | Redoxin domain protein                                            | Staphylococcus aureus subsp.        |                                                 |
|    |          | 156722165 | dbj      | BAF78582.1     |            | hypothetical protein                                              | Staphylococcus aureus subsp.        |                                                 |
| 30 | 1.43E-16 | 113869129 | ref      | YP_727618.1    |            | thiol peroxidase                                                  | Ralstonia eutropha H16              | NIVPSLDTPVCAQASARTISADAMGRFCRGAIEFKGVLDLAVGTARA |
|    |          | 113827905 | emb      | CAJ94250.1     |            | thiol peroxidase                                                  | Ralstonia eutropha H16              |                                                 |

|    |          |                                                             |  |  |                                                                                                                                  |                                                             |                                                                                                     |                                                 |
|----|----------|-------------------------------------------------------------|--|--|----------------------------------------------------------------------------------------------------------------------------------|-------------------------------------------------------------|-----------------------------------------------------------------------------------------------------|-------------------------------------------------|
| 31 | 4.77E-15 | 149181112 ref<br>148851199 gb                               |  |  | thioredoxin peroxidase<br>thioredoxin peroxidase                                                                                 | ZP_01869612.1<br>EDL65349.1                                 | Bacillus sp. SG-1<br>Bacillus sp. SG-1                                                              | SVVPSLDTGVCDQAQTRTISADAQRWRWCELRLLARAKVTYVSEGI  |
| 32 | 5.21E-09 | 29377396 ref<br>293444863 gb                                |  |  | AhpC/TSA family protein<br>AhpC/TSA family protein                                                                               | NP_816550.1<br>AAO82620.1                                   | Enterococcus faecalis V583<br>Enterococcus faecalis V583                                            | NVTSVVPDIDTRVCSLQTKTISNNEQANNWCEGVEMEEMGLRAR    |
| 33 | 0        | 152983573 ref<br>150958731 gb                               |  |  | thiol peroxidase<br>thiol peroxidase                                                                                             | YP_001348064.1<br>ABR80756.1                                | Pseudomonas aeruginosa PA7<br>Pseudomonas aeruginosa PA7                                            | DVTNIFPSVDTPTCATSVRCISADSAQKRFCOEGLENVLAGLAARA  |
| 34 | 2.21E-15 | 110639903 ref<br>110282584 gb                               |  |  | thiol peroxidase<br>thiol peroxidase (atypical 2-Cys peroxiredoxin)                                                              | YP_680113.1<br>ABG60770.1                                   | Cytophaga hutchinsonii ATCC 33406<br>Cytophaga hutchinsonii ATCC 33406                              | KVTDLSEGTIAPVPSLDTSVCALETRVSKDAMKRFCLKGLSARA    |
| 35 | 8.62E-12 | 110601201 ref<br>110548076 gb                               |  |  | Alkyl hydroperoxide reductase/ Thiol specific antioxidant/ Maf<br>Alkyl hydroperoxide reductase/ Thiol specific antioxidant/ Maf | ZP_01389398.1<br>EAT161305.1                                | Geobacter sp. FRC-32<br>Geobacter sp. FRC-32                                                        | VVTLAPITLASSAVPSLDTVPVCEMETREAAATLPTVSLDAQKRWCV |
| 36 | 2.07E-09 | 148377468 ref<br>148291514 emb                              |  |  | Thiol peroxidase<br>Thiol peroxidase                                                                                             | YP_001256344.1<br>CAL58900.1                                | Mycoplasma agalactiae PG2<br>Mycoplasma agalactiae PG2                                              | LGNEVKAVDLSVPSIDTGTCDIEATVVSYDAQNRWCVGGLLTRA    |
| 37 | 0        | 157145652 ref<br>157082857 gb                               |  |  | hypothetical protein CKO_01399<br>hypothetical protein CKO_01399                                                                 | YP_001452970.1<br>ABV12535.1                                | Citrobacter koseri ATCC BAA-895<br>Citrobacter koseri ATCC BAA-895                                  | DVTNIFPSIDTGVCAASVRCVSADAAQSRFCYGVETLTKGLAARA   |
| 38 | 5.94E-15 | 83856669 ref<br>83850469 gb                                 |  |  | thiol peroxidase<br>thiol peroxidase                                                                                             | ZP_00950198.1<br>EAP88337.1                                 | Croceibacter atlanticus HTC2559<br>Croceibacter atlanticus HTC2559                                  | KDFEGKNIFPSIDTNTCATSVRCISRDKALKRFIGITFEGLLSRA   |
| 39 | 8.41E-15 | 119469552 ref<br>119447087 gb                               |  |  | putative periplasmic thiol peroxidase<br>putative periplasmic thiol peroxidase                                                   | ZP_01612456.1<br>EAW28357.1                                 | Alteromonadales bacterium TW-7<br>Alteromonadales bacterium TW-7                                    | GVSEAPDFSVVPSLDTGYCSLQTKTVSADAAQKRFCMDMGLLTR    |
| 40 | 2.74E-16 | 70728213 ref<br>82682305 sp<br>68448937 dbj                 |  |  | hypothetical protein SH1212<br>TPX_STA1HJ Probable thiol peroxidase<br>unnamed protein product                                   | YP_253127.1<br>Q4L754<br>BAE04521.1                         | Staphylococcus haemolyticus<br>Staphylococcus haemolyticus                                          | SVVPSIDTGVCDQQTRTISADAQKRWCGLDELRLARSIVSEGI     |
| 41 | 6.71E-16 | 158520858 ref<br>158809684 gb                               |  |  | Redoxin domain protein<br>Redoxin domain protein                                                                                 | YP_001528728.1<br>ABW66651.1                                | Desulfococcus oleovorans Hxd3<br>Desulfococcus oleovorans Hxd3                                      | LLTNIFPSIDTACSMSVPSISLDAHKRFCEGIENALAGLARA      |
| 42 | 1.64E-20 | 88812455 ref<br>88790241 gb                                 |  |  | thiol peroxidase<br>thiol peroxidase                                                                                             | ZP_01127704.1<br>EAR21359.1                                 | Nitrococcus mobilis Nb-231<br>Nitrococcus mobilis Nb-231                                            | TVTNIWPSLDTPTCAASTRAVSAQAQKRFLAGLTARALDAECS     |
| 43 | 0        | 37526470 ref<br>36785901 emb                                |  |  | thiol peroxidase<br>Thiol peroxidase (scavengase p20)                                                                            | NP_929814.1<br>CAE14953.1                                   | Photothabdus luminescens subsp.<br>Photothabdus luminescens subsp.                                  | NIFFSIDTGVCAASVRCISADAAQSRFCVVTLISGLTARAESDNVI  |
| 44 | 4.42E-16 | 15615756 ref<br>11134994 sp<br>10175817 dbj                 |  |  | thioredoxin peroxidase<br>TPX_BACHD Probable thiol peroxidase<br>thioredoxin peroxidase                                          | NP_244060.1<br>Q9K873<br>BAB06913.1                         | Bacillus halodurans C-125<br>Bacillus halodurans C-125                                              | SVVPSIDTGVCDQAQTRTAAANLDTVSDAQKRWCCELRLARAET    |
| 45 | 1.55E-15 | 150007114 ref<br>149935538 gb                               |  |  | thiol peroxidase<br>thiol peroxidase                                                                                             | YP_001301857.1<br>ABR42235.1                                | Parabacteroides distasonis ATCC<br>Parabacteroides distasonis ATCC                                  | KVTVGTEAPNVFPSLDTSVCAASVRAVSKDAHGRFCLKGLLARC    |
| 46 | 1.62E-19 | 149378494 ref<br>149357221 gb                               |  |  | thiol peroxidase<br>thiol peroxidase                                                                                             | ZP_01896174.1<br>EDM45763.1                                 | Marinobacter algicola DG893<br>Marinobacter algicola DG893                                          | DVTNIVPSVDTPTCATSTRIVSADAAGRFCEGLENVLAGLTSRA    |
| 47 | 0        | 75179028 ref<br>75240030 ref<br>82544228 ref<br>81245639 gb |  |  | COG2077: Peroxiredoxin<br>COG2077: Peroxiredoxin<br>thiol peroxidase<br>thiol peroxidase                                         | ZP_00699046.1<br>YP_00723991.1<br>YP_408175.1<br>ABB66347.1 | Shigella boydii BS512<br>Escherichia coli E110019<br>Shigella boydii Sb227<br>Shigella boydii Sb227 | DVTNIFPSIDTGVCAASVRCISADAAQSRFCLEGLNVVLAGLAARA  |
| 48 | 1.32E-14 | 21283385 ref<br>49485638 ref                                |  |  | hypothetical protein MW1656<br>putative thiol peroxidase                                                                         | NP_646473.1<br>YP_043759.1                                  | Staphylococcus aureus subsp.<br>Staphylococcus aureus subsp.                                        | VTLADSVVPSIDTGVCDQQTRREGIVLTAGKRWCVGLDELRLARA   |

|  |  |  |  |                |                                                                |                                     |  |
|--|--|--|--|----------------|----------------------------------------------------------------|-------------------------------------|--|
|  |  |  |  | YP_186596.1    | thiol peroxidase, putative                                     | Staphylococcus aureus subsp.        |  |
|  |  |  |  | 87161687.ref   | thiol peroxidase                                               | Staphylococcus aureus subsp.        |  |
|  |  |  |  | YP_494353.1    | hypothetical protein SAOUHSC_01822                             | Staphylococcus aureus subsp.        |  |
|  |  |  |  | 88195522.ref   | thiol peroxidase                                               | Staphylococcus aureus subsp.        |  |
|  |  |  |  | 151221819.ref  | possible peroxidase                                            | Staphylococcus aureus subsp.        |  |
|  |  |  |  | YP_001332641.1 | TPX_STAAW Probable thiol peroxidase                            | Staphylococcus aureus subsp.        |  |
|  |  |  |  | 161509927.ref  | TPX_STAAS Probable thiol peroxidase                            | Staphylococcus aureus subsp.        |  |
|  |  |  |  | Q8NW51         | TPX_STAAC Probable thiol peroxidase                            | Staphylococcus aureus subsp.        |  |
|  |  |  |  | 60390697.sp    | MW1656                                                         | Staphylococcus aureus subsp.        |  |
|  |  |  |  | Q6H61          | putative thiol peroxidase                                      | Staphylococcus aureus subsp.        |  |
|  |  |  |  | 21204825.dbj   | thiol peroxidase, putative                                     | Staphylococcus aureus subsp.        |  |
|  |  |  |  | 49244981.emb   | conserved hypothetical protein                                 | Staphylococcus aureus subsp.        |  |
|  |  |  |  | 57286197.gb    | thiol peroxidase                                               | Staphylococcus aureus subsp.        |  |
|  |  |  |  | ABD22175.1     | thiol peroxidase                                               | Staphylococcus aureus subsp.        |  |
|  |  |  |  | 87127661.gb    | thiol peroxidase                                               | Staphylococcus aureus subsp.        |  |
|  |  |  |  | 87203080.gb    | thiol peroxidase                                               | Staphylococcus aureus subsp.        |  |
|  |  |  |  | 150374619.dbj  | possible peroxidase                                            | Staphylococcus aureus subsp.        |  |
|  |  |  |  | BAF67879.1     | possible peroxidase                                            | Staphylococcus aureus subsp.        |  |
|  |  |  |  | ABX29707.1     | TPx                                                            | Bacillus licheniformis ATCC 14580   |  |
|  |  |  |  | YP_092644.1    | TPx                                                            | Bacillus licheniformis DSM 13       |  |
|  |  |  |  | AAU41951.1     | TPx                                                            | Bacillus licheniformis DSM 13       |  |
|  |  |  |  |                | Redoxin                                                        | Pseudomonas atlantica T6c           |  |
|  |  |  |  | YP_663290.1    | thiol peroxidase (atypical 2-Cys peroxidase)                   | Pseudomonas atlantica T6c           |  |
|  |  |  |  | 109702316.gb   | Alkyl hydroperoxide reductase/ Thiol specific antioxidant/ Maf | Chlorobium phaeobacteroides BS1     |  |
|  |  |  |  | ABG42236.1     | Alkyl hydroperoxide reductase/ Thiol specific antioxidant/ Maf | Chlorobium phaeobacteroides BS1     |  |
|  |  |  |  |                | Alkyl hydroperoxide reductase/ Thiol specific antioxidant/ Maf | Chlorobium phaeobacteroides BS1     |  |
|  |  |  |  | 79393932.ref   | Alkyl hydroperoxide reductase/ Thiol specific antioxidant/ Maf | Tenacibaculum sp. MED152            |  |
|  |  |  |  | ZP_00531448.1  | Alkyl hydroperoxide reductase/ Thiol specific antioxidant/ Maf | Polaribacter dokdonensis MED152     |  |
|  |  |  |  | EAM64148.1     | Alkyl hydroperoxide reductase/ Thiol specific antioxidant/ Maf | Moritella sp. PE36                  |  |
|  |  |  |  |                | Alkyl hydroperoxide reductase/ Thiol specific antioxidant/ Maf | Moritella sp. PE36                  |  |
|  |  |  |  | ZP_01052002.1  | putative thiol peroxidase protein                              | Spiroplasma citri                   |  |
|  |  |  |  | EAQ41430.1     | thiol peroxidase                                               | Hydrogenivirga sp. 128-5-R1-1       |  |
|  |  |  |  |                | thiol peroxidase                                               | Hydrogenivirga sp. 128-5-R1-1       |  |
|  |  |  |  | ZP_01896532.1  | putative thiol peroxidase                                      | Clostridium botulinum F str.        |  |
|  |  |  |  | EDM68801.1     | putative thiol peroxidase                                      | Clostridium botulinum F str.        |  |
|  |  |  |  |                | putative thiol peroxidase protein                              | Hahella chejuensis KCTC 2396        |  |
|  |  |  |  | CAK99161.1     | thiol peroxidase                                               | Hahella chejuensis KCTC 2396        |  |
|  |  |  |  |                | thiol peroxidase                                               | Hydrogenobaculum sp. Y04AAS1        |  |
|  |  |  |  | ZP_02179909.1  | thiol peroxidase                                               | Hydrogenobaculum sp. Y04AAS1        |  |
|  |  |  |  | EDP73326.1     | putative thiol peroxidase                                      | Aquifex aeolicus VF5                |  |
|  |  |  |  |                | putative thiol peroxidase                                      | Aquifex aeolicus VF5                |  |
|  |  |  |  | ZP_001389866.1 | thiol peroxidase                                               | Aquifex aeolicus VF5                |  |
|  |  |  |  | ABS41317.1     | thiol peroxidase                                               | Aquifex aeolicus VF5                |  |
|  |  |  |  |                | Peroxiredoxin                                                  | Hahella chejuensis KCTC 2396        |  |
|  |  |  |  | YP_432886.1    | Peroxiredoxin                                                  | Hahella chejuensis KCTC 2396        |  |
|  |  |  |  | 83632494.gb    | Redoxin domain protein                                         | Hydrogenobaculum sp. Y04AAS1        |  |
|  |  |  |  |                | Redoxin domain protein                                         | Hydrogenobaculum sp. Y04AAS1        |  |
|  |  |  |  | ZP_02060160.1  | thiol peroxidase                                               | Aquifex aeolicus VF5                |  |
|  |  |  |  | EDO51560.1     | thiol peroxidase                                               | Aquifex aeolicus VF5                |  |
|  |  |  |  |                | TPX_AQUAE Probable thiol peroxidase                            | Aquifex aeolicus VF5                |  |
|  |  |  |  | NP_213340.1    | thiol peroxidase                                               | Aquifex aeolicus VF5                |  |
|  |  |  |  | O66780         | thiol peroxidase                                               | Aquifex aeolicus VF5                |  |
|  |  |  |  | 2983133.gb     | Alkyl hydroperoxide reductase/ Thiol specific antioxidant/ Maf | Pseudomonas fluorescens PfO-1       |  |
|  |  |  |  |                | thiol peroxidase (atypical 2-Cys peroxidase)                   | Pseudomonas fluorescens PfO-1       |  |
|  |  |  |  | YP_348251.1    | Redoxin domain protein                                         | Bacillus weihenstephanensis KBAB4   |  |
|  |  |  |  | 77382748.gb    | Redoxin domain protein                                         | Bacillus weihenstephanensis KBAB4   |  |
|  |  |  |  |                | Redoxin domain protein                                         | Bacillus weihenstephanensis KBAB4   |  |
|  |  |  |  | YP_001647256.1 | Alkyl hydroperoxide reductase/ Thiol specific antioxidant/ Maf | Sulfurimonas denitrificans DSM 1251 |  |
|  |  |  |  | ABY45628.1     | thiol peroxidase (atypical 2-Cys peroxidase)                   | Sulfurimonas denitrificans DSM 1251 |  |
|  |  |  |  |                | Alkyl hydroperoxide reductase/ Thiol specific antioxidant/ Maf | Sulfurimonas denitrificans DSM 1251 |  |
|  |  |  |  | YP_392648.1    | thiol peroxidase (atypical 2-Cys peroxidase)                   | Sulfurimonas denitrificans DSM 1251 |  |
|  |  |  |  | ABB43413.1     |                                                                |                                     |  |



|    |          |           |     |                |                                                             |                                                             |                |                                              |                                                 |
|----|----------|-----------|-----|----------------|-------------------------------------------------------------|-------------------------------------------------------------|----------------|----------------------------------------------|-------------------------------------------------|
| 63 | 7.13E-14 | 27468307  | ref | NP_764944.1    | thioredoxin peroxidase                                      | thioredoxin peroxidase                                      | NP_764944.1    | Staphylococcus epidermidis ATCC 5980         | SVIPSIDTGVCDSTQTRASAEDGTISVDAQKRWCGLDLRLRLARS   |
|    |          | 57867225  | ref | YP_188849.1    | thiol peroxidase, putative                                  | thiol peroxidase, putative                                  | YP_188849.1    | Staphylococcus epidermidis RP62A             |                                                 |
|    |          | 60390725  | sp  | Q8CS58         | TPX_STAES Probable thiol peroxidase                         | TPX_STAES Probable thiol peroxidase                         |                |                                              |                                                 |
|    |          | 73919889  | sp  | Q5HNU2         | TPX_STAEQ Probable thiol peroxidase                         | TPX_STAEQ Probable thiol peroxidase                         |                |                                              |                                                 |
|    |          | 27315853  | gb  | AAO04988.1     | AE016748_222 thioredoxin peroxidase                         | AE016748_222 thioredoxin peroxidase                         |                |                                              |                                                 |
|    |          | 57637883  | gb  | AAW54671.1     | thiol peroxidase, putative                                  | thiol peroxidase, putative                                  |                |                                              |                                                 |
|    |          |           |     |                |                                                             |                                                             |                |                                              |                                                 |
| 64 | 6.80E-09 | 15672286  | ref | NP_266460.1    | thiol peroxidase                                            | thiol peroxidase                                            | NP_266460.1    | Lactococcus lactis subsp. lactis             | PDFELTSVFPDINTRVCSLQTKKQKNWCGVDITLADLEGLRLARS   |
|    |          | 12723169  | gb  | AAK04402.1     | AE006287_8 thiol peroxidase (1.1.1.-)                       | AE006287_8 thiol peroxidase (1.1.1.-)                       |                | Lactococcus lactis subsp. lactis             |                                                 |
|    |          |           |     |                |                                                             |                                                             |                |                                              |                                                 |
| 65 | 0        | 77961681  | ref | ZP_00825513.1  | COG2077: Peroxiredoxin                                      | COG2077: Peroxiredoxin                                      |                | Yersinia mollaretii ATCC 43969               | SSFVGNIFPISDITGVCAASVRCISSDAQSRFCGVVALAGLTARA   |
|    |          |           |     |                |                                                             |                                                             |                |                                              |                                                 |
| 66 | 7.48E-11 | 148978181 | ref | ZP_01814711.1  | Tpx                                                         | Tpx                                                         | ZP_01814711.1  | Vibrio cholerae nonae O139                   | TVTKQADFKYLFPSVDITPVCSSSTKTSTVDEGVEGVLSGLSARA   |
|    |          | 145962603 | gb  | EDK27879.1     | Tpx                                                         | Tpx                                                         |                | Vibrio cholerae nonae O139                   |                                                 |
|    |          |           |     |                |                                                             |                                                             |                |                                              |                                                 |
| 67 | 2.15E-20 | 145219910 | ref | YP_001130619.1 | Redoxin domain protein                                      | Redoxin domain protein                                      | YP_001130619.1 | Prosthecochloris vibriofomis DSM 11630       | VGSEAPNIFPSLDTAVCAASVRCISADAHKRFVCGLDLRLSRA     |
|    |          | 145206074 | gb  | ABP37117.1     | thiol peroxidase (atypical 2-Cys peroxiredoxin)             | thiol peroxidase (atypical 2-Cys peroxiredoxin)             |                | Prosthecochloris vibriofomis DSM 11630       |                                                 |
|    |          |           |     |                |                                                             |                                                             |                |                                              |                                                 |
| 68 | 7.83E-14 | 116626219 | ref | YP_828375.1    | Redoxin domain protein                                      | Redoxin domain protein                                      | YP_828375.1    | Solibacter usitatus Ellin6076                | SVIPSLDTPVCDAGTKGVDTVSMDAQKRWCEAALTAARAGAAAT    |
|    |          | 116229381 | gb  | ABJ88090.1     | thiol peroxidase (atypical 2-Cys peroxiredoxin)             | thiol peroxidase (atypical 2-Cys peroxiredoxin)             |                | Solibacter usitatus Ellin6076                |                                                 |
|    |          |           |     |                |                                                             |                                                             |                |                                              |                                                 |
| 69 | 2.83E-20 | 82701345  | ref | YP_410911.1    | Alkyl hydroperoxide reductase/Thiol specific antioxidant/Me | Alkyl hydroperoxide reductase/Thiol specific antioxidant/Me | YP_410911.1    | Nitrosospora multifomis ATCC 25196           | NIVPSLDTPVCAMSTRIIADAMISRFVCGLDRAEAFMLAGITARA   |
|    |          | 82409410  | gb  | ABB73519.1     | thiol peroxidase (atypical 2-Cys peroxiredoxin)             | thiol peroxidase (atypical 2-Cys peroxiredoxin)             |                | Nitrosospora multifomis ATCC 25196           |                                                 |
|    |          |           |     |                |                                                             |                                                             |                |                                              |                                                 |
| 70 | 4.27E-16 | 115350557 | ref | YP_772396.1    | Redoxin domain protein                                      | Redoxin domain protein                                      | YP_772396.1    | Burkholderia ambifaria AMMD 100              | ASFAGKNIIVPSLDTPTCATSTRVVSVDAAATRFVCGVDLNGLTARA |
|    |          | 118701446 | ref | ZP_01569507.1  | Redoxin                                                     | Redoxin                                                     |                | Burkholderia ambifaria MC40-6                |                                                 |
|    |          | 115280545 | gb  | ABI86062.1     | thiol peroxidase (atypical 2-Cys peroxiredoxin)             | thiol peroxidase (atypical 2-Cys peroxiredoxin)             |                | Burkholderia ambifaria AMMD 100              |                                                 |
|    |          | 118641069 | gb  | EAV47920.1     | Redoxin                                                     | Redoxin                                                     |                | Burkholderia ambifaria MC40-6                |                                                 |
|    |          |           |     |                |                                                             |                                                             |                |                                              |                                                 |
| 71 | 4.56E-21 | 144901330 | emb | CAM78194.1     | thiol peroxidase                                            | thiol peroxidase                                            |                | Magnetospirillum gyphiswaldense              | SVFPSVDTPTCATSVRCASADAHKRFVCGLTLAGLARAIGADGT    |
|    |          |           |     |                |                                                             |                                                             |                |                                              |                                                 |
| 72 | 0        | 62423048  | ref | ZP_00378221.1  | COG2077: Peroxiredoxin                                      | COG2077: Peroxiredoxin                                      |                | Brevibacterium linens BL2                    | NIFPSVDTGVCAASVRASLENITCVSNDAQARFCVGTLAGLLARS   |
|    |          |           |     |                |                                                             |                                                             |                |                                              |                                                 |
| 73 | 2.05E-18 | 116517151 | ref | YP_816920.1    | thiol peroxidase                                            | thiol peroxidase                                            | YP_816920.1    | Streptococcus pneumoniae D39                 | VSFTGKSVVPSIDTGCICSTQTRGLDITVSMDAQKRWCEWHLLAR   |
|    |          | 148984084 | ref | ZP_01817379.1  | thiol peroxidase                                            | thiol peroxidase                                            |                | Streptococcus pneumoniae SP3-                |                                                 |
|    |          | 148986696 | ref | ZP_01820129.1  | thiol peroxidase                                            | thiol peroxidase                                            |                | Streptococcus pneumoniae SP6-                |                                                 |
|    |          | 148997701 | ref | ZP_01825265.1  | thiol peroxidase                                            | thiol peroxidase                                            |                | Streptococcus pneumoniae SP11-               |                                                 |
|    |          | 149011488 | ref | ZP_01832735.1  | thiol peroxidase                                            | thiol peroxidase                                            |                | Streptococcus pneumoniae SP19-               |                                                 |
|    |          | 149021257 | ref | ZP_01835503.1  | thiol peroxidase                                            | thiol peroxidase                                            |                | Streptococcus pneumoniae SP23-               |                                                 |
|    |          | 161410732 | ref | NP_346090.2    | thiol peroxidase                                            | thiol peroxidase                                            | NP_346090.2    | Streptococcus pneumoniae TIGR4               |                                                 |
|    |          | 161410742 | ref | NP_359088.2    | thiol peroxidase                                            | thiol peroxidase                                            | NP_359088.2    | Streptococcus pneumoniae R6                  |                                                 |
|    |          | 61248612  | sp  | P0A4M6         | TPX_STRR6 Probable thiol peroxidase                         | TPX_STRR6 Probable thiol peroxidase                         |                | Streptococcus pneumoniae (strain ATCC 49619) |                                                 |
|    |          | 122278234 | sp  | Q04JB8         | TPX_STRP2 Probable thiol peroxidase                         | TPX_STRP2 Probable thiol peroxidase                         |                | Streptococcus pneumoniae D39                 |                                                 |
|    |          | 134048489 | sp  | P0C2J8         | TPX1_STRPN Probable thiol peroxidase                        | TPX1_STRPN Probable thiol peroxidase                        |                | Streptococcus pneumoniae                     |                                                 |
|    |          | 1568609   | gb  | AAO24471.1     | 18kDa protein                                               | 18kDa protein                                               |                | Streptococcus pneumoniae                     |                                                 |
|    |          | 116077727 | gb  | ABJ55447.1     | thiol peroxidase                                            | thiol peroxidase                                            |                | Streptococcus pneumoniae D39                 |                                                 |
|    |          | 147756200 | gb  | EDK63242.1     | thiol peroxidase                                            | thiol peroxidase                                            |                | Streptococcus pneumoniae SP11-               |                                                 |
|    |          | 147764478 | gb  | EDK71409.1     | thiol peroxidase                                            | thiol peroxidase                                            |                | Streptococcus pneumoniae SP19-               |                                                 |
|    |          | 147923373 | gb  | EDK74486.1     | thiol peroxidase                                            | thiol peroxidase                                            |                | Streptococcus pneumoniae SP3-                |                                                 |
|    |          | 147925897 | gb  | EDK76972.1     | thiol peroxidase                                            | thiol peroxidase                                            |                | Streptococcus pneumoniae SP6-                |                                                 |
|    |          | 147930358 | gb  | EDK81342.1     | thiol peroxidase                                            | thiol peroxidase                                            |                | Streptococcus pneumoniae SP23-               |                                                 |
|    |          |           |     |                |                                                             |                                                             |                |                                              |                                                 |
| 74 | 3.29E-12 | 47093445  | ref | ZP_00231209.1  | thiol peroxidase                                            | thiol peroxidase                                            | ZP_00231209.1  | Listeria monocytogenes str. 4b               | VGTERKEVTSVPSIDTVCVCSSTQTRITVSDAQKRWCEWLLRLARS  |
|    |          | 47096796  | ref | ZP_00234378.1  | thiol peroxidase                                            | thiol peroxidase                                            |                | Listeria monocytogenes str. 1/2a             |                                                 |
|    |          | 153174744 | ref | ZP_01930213.1  | thiol peroxidase                                            | thiol peroxidase                                            |                | Listeria monocytogenes ESL N3-165            |                                                 |
|    |          | 153179614 | ref | ZP_01932833.1  | thiol peroxidase                                            | thiol peroxidase                                            |                | Listeria monocytogenes F6900                 |                                                 |
|    |          | 153186113 | ref | ZP_01936532.1  | thiol peroxidase                                            | thiol peroxidase                                            |                | Listeria monocytogenes J0161                 |                                                 |
|    |          | 153191019 | ref | ZP_01938330.1  | thiol peroxidase                                            | thiol peroxidase                                            |                | Listeria monocytogenes J2818                 |                                                 |

|    |           |           |               |                  |                                                               |
|----|-----------|-----------|---------------|------------------|---------------------------------------------------------------|
|    | 153196781 | ref       | ZP_01941108.1 | thiol peroxidase | Listeria monocytogenes 10403S                                 |
|    | 47014829  | gb        | EAL05780.1    | thiol peroxidase | Listeria monocytogenes str. 1/2a                              |
|    | 47018173  | gb        | EAL08942.1    | thiol peroxidase | Listeria monocytogenes str. 4b                                |
|    | 126841394 | gb        | EBA19282.1    | thiol peroxidase | Listeria monocytogenes J0161                                  |
|    | 127633664 | gb        | EBA23072.1    | thiol peroxidase | Listeria monocytogenes 10403S                                 |
|    | 127765587 | gb        | EBA25935.1    | thiol peroxidase | Listeria monocytogenes J2818                                  |
|    | 133729975 | gb        | EBA31673.1    | thiol peroxidase | Listeria monocytogenes FSL N3-165                             |
|    | 133733099 | gb        | EBA34797.1    | thiol peroxidase | Listeria monocytogenes F6900                                  |
| 75 | 1.00E-18  | 150006425 | ref           | YP_001301169.1   | putative thiol peroxidase                                     |
|    |           | 149934849 | gb            | ABR41547.1       | putative thiol peroxidase                                     |
| 76 | 2.79E-18  | 89891363  | ref           | ZP_01202869.1    | thiol peroxidase, AhpC/TSA family                             |
|    |           | 89516394  | gb            | EAS19055.1       | thiol peroxidase, AhpC/TSA family                             |
| 77 | 3.57E-12  | 46807814  | ref           | YP_014203.1      | thiol peroxidase                                              |
|    |           | 153167171 | ref           | ZP_01927452.1    | thiol peroxidase                                              |
|    |           | 153202503 | ref           | ZP_01944039.1    | thiol peroxidase                                              |
|    |           | 67461795  | sp            | Q71Z84           | TPX_LISMF Probable thiol peroxidase                           |
|    |           | 46881083  | gb            | AA104380.1       | thiol peroxidase                                              |
|    |           | 133727105 | gb            | EBA28803.1       | thiol peroxidase                                              |
|    |           | 133735278 | gb            | EBA36876.1       | thiol peroxidase                                              |
| 78 | 0         | 120403953 | ref           | YP_953782.1      | thiol peroxidase                                              |
|    |           | 119956771 | gb            | ABM113776.1      | thiol peroxidase (atypical 2-Cys peroxiredoxin)               |
| 79 | 1.28E-18  | 111657856 | ref           | ZP_01408570.1    | hypothetical protein SpneT_02000953                           |
|    |           | 4193357   | gb            | AAD09977.1       | putative hydrophobic transmembrane protein; Psad              |
|    |           | 14973141  | gb            | AAK75730.1       | thiol peroxidase                                              |
|    |           | 154593155 | gb            | AA100299.1       | Thioredoxin-linked thiol peroxidase                           |
| 80 | 7.67E-16  | 94311999  | ref           | YP_585209.1      | Antioxidant Tpx                                               |
|    |           | 93355851  | gb            | ABF09940.1       | thiol peroxidase (atypical 2-Cys peroxiredoxin)               |
| 81 | 1.13E-15  | 91792718  | ref           | YP_562369.1      | Antioxidant Tpx                                               |
|    |           | 91714720  | gb            | ABE54846.1       | Antioxidant Tpx                                               |
| 82 | 0         | 15597728  | ref           | NP_251222.1      | thiol peroxidase                                              |
|    |           | 84320765  | ref           | ZP_00969134.1    | COG2077: Peroxiredoxin                                        |
|    |           | 84326859  | ref           | ZP_00974883.1    | COG2077: Peroxiredoxin                                        |
|    |           | 107101979 | ref           | ZP_01365897.1    | hypothetical protein PaerPA_01003026                          |
|    |           | 116050476 | ref           | YP_790705.1      | thiol peroxidase                                              |
|    |           | 11134977  | sp            | P57688           | TPX_PSEAE Probable thiol peroxidase                           |
|    |           | 9948589   | gb            | AA605920.1       | AE004681.2 thiol peroxidase                                   |
|    |           | 115585697 | gb            | ABJ11712.1       | thiol peroxidase                                              |
|    |           | 126167458 | gb            | EAZ52969.1       | thiol peroxidase                                              |
|    |           | 126194341 | gb            | EAZ58404.1       | thiol peroxidase                                              |
| 83 | 1.47E-12  | 68055940  | ref           | ZP_00540078.1    | Alkyl hydroperoxide reductase/Thiol specific antioxidant/ Maf |
|    |           | 68007464  | gb            | EAM8672.1        | Alkyl hydroperoxide reductase/Thiol specific antioxidant/ Maf |
| 84 | 1.71E-17  | 154495139 | ref           | ZP_02034144.1    | hypothetical protein PARMER_04186                             |
|    |           | 154085689 | gb            | EDN84734.1       | hypothetical protein PARMER_04186                             |
| 85 | 5.00E-15  | 73662361  | ref           | YP_301142.1      | putative peroxiredoxin                                        |
|    |           | 82582306  | sp            | Q49YE4           | TPX_STAS1 Probable thiol peroxidase                           |
|    |           | 72494876  | dbj           | BAE18197.1       | putative peroxiredoxin                                        |

|     |          |           |     |                |                                                 |                                                 |                |           |     |                                     |                                                |
|-----|----------|-----------|-----|----------------|-------------------------------------------------|-------------------------------------------------|----------------|-----------|-----|-------------------------------------|------------------------------------------------|
| 86  | 9.36E-16 | 152977007 | ref | YP_001376524.1 | Redoxin domain protein                          | Redoxin domain protein                          | YP_001376524.1 | 152977007 | ref | Bacillus cereus subsp. cytotoxis    | SVVPSIDTGYCDAQTRAGIENTTISVDAQKRWCVWTELRLARA    |
|     |          | 152025759 | gb  | ABS23529.1     | Redoxin domain protein                          | Redoxin domain protein                          |                |           |     | Bacillus cereus subsp. cytotoxis    |                                                |
| 87  | 4.64E-18 | 148379504 | ref | YP_001253045.1 | thiol peroxidase                                | thiol peroxidase                                | YP_001253045.1 | 148379504 | ref | Clostridium botulinum A str. ATCC   | EGNELKSVVPSLDTEVCDLETRTISMDAQARWCGVDELGLLTRA   |
|     |          | 153933469 | ref | YP_001382892.1 | putative thiol peroxidase                       | putative thiol peroxidase                       | YP_001382892.1 | 153933469 | ref | Clostridium botulinum A str. ATCC   |                                                |
|     |          | 153936039 | ref | YP_001386458.1 | putative thiol peroxidase                       | putative thiol peroxidase                       | YP_001386458.1 | 153936039 | ref | Clostridium botulinum A str. Hall   |                                                |
|     |          | 148287988 | emb | CAL82055.1     | thiol peroxidase                                | thiol peroxidase                                | CAL82055.1     | 148287988 | emb | Clostridium botulinum A str. ATCC   |                                                |
|     |          | 152929512 | gb  | ABS35012.1     | putative thiol peroxidase                       | putative thiol peroxidase                       | ABS35012.1     | 152929512 | gb  | Clostridium botulinum A str. ATCC   |                                                |
|     |          | 152931953 | gb  | ABS37452.1     | putative thiol peroxidase                       | putative thiol peroxidase                       | ABS37452.1     | 152931953 | gb  | Clostridium botulinum A str. Hall   |                                                |
| 88  | 7.29E-20 | 152991403 | ref | YP_001357125.1 | thiol peroxidase                                | thiol peroxidase                                | YP_001357125.1 | 152991403 | ref | Nitratiraptor sp. SB155-2           | VVVPISLTPVCATETRGVDVSMDSKRFCEGVENLLKGLSARA     |
|     |          | 151423264 | dbj | BAF70768.1     | thiol peroxidase                                | thiol peroxidase                                | BAF70768.1     | 151423264 | dbj | Nitratiraptor sp. SB155-2           |                                                |
| 89  | 0        | 53728819  | ref | ZP_00134953.2  | COG2077: Peroxiredoxin                          | COG2077: Peroxiredoxin                          | ZP_00134953.2  | 53728819  | ref | Acinobacillus pleuropneumoniae      | NIFPSIDTGVCATSVRCISADAAQARFCEGIENVGVDLAGLTSRS  |
|     |          | 126203953 | ref | YP_001054178.1 | putative thiol peroxidase                       | putative thiol peroxidase                       | YP_001054178.1 | 126203953 | ref | Acinobacillus pleuropneumoniae L20  |                                                |
|     |          | 165976917 | ref | YP_001652510.1 | probable thiol peroxidase                       | probable thiol peroxidase                       | YP_001652510.1 | 165976917 | ref | Acinobacillus pleuropneumoniae      |                                                |
|     |          | 126097745 | gb  | ABN74573.1     | putative thiol peroxidase                       | putative thiol peroxidase                       | ABN74573.1     | 126097745 | gb  | Acinobacillus pleuropneumoniae L20  |                                                |
|     |          | 165877018 | gb  | ABY70066.1     | probable thiol peroxidase                       | probable thiol peroxidase                       | ABY70066.1     | 165877018 | gb  | Acinobacillus pleuropneumoniae      |                                                |
| 90  | 2.07E-11 | 161613859 | ref | YP_001587824.1 | hypothetical protein SPAB_01594                 | hypothetical protein SPAB_01594                 | YP_001587824.1 | 161613859 | ref | Salmonella enterica subsp. enterica | LQGEHAKFGILAEIGVVPSLDTPVCEWQVKVLSMDAQRFFVVT    |
|     |          | 161363223 | gb  | ABX66891.1     | hypothetical protein SPAB_01594                 | hypothetical protein SPAB_01594                 | ABX66891.1     | 161363223 | gb  | Salmonella enterica subsp. enterica |                                                |
| 91  | 6.89E-21 | 146299870 | ref | YP_001194461.1 | Redoxin domain protein                          | Redoxin domain protein                          | YP_001194461.1 | 146299870 | ref | Flavobacterium johnsoniae UW101     | NIFPSVDTGTTCATSVRSGLNTCISRDAQKRFQVVDLGLHSRA    |
|     |          | 146154288 | gb  | ABQ05142.1     | thiol peroxidase (atypical 2-Cys peroxiredoxin) | thiol peroxidase (atypical 2-Cys peroxiredoxin) | ABQ05142.1     | 146154288 | gb  | Flavobacterium johnsoniae UW101     |                                                |
| 92  | 7.73E-17 | 146321246 | ref | YP_001200957.1 | thiol peroxidase                                | thiol peroxidase                                | YP_001200957.1 | 146321246 | ref | Streptococcus suis 98HAH33          | PVTSVPSIDTGTICDTQTRVTSADAAQKRWAGLEDAEWNLLARA   |
|     |          | 145892052 | gb  | ABP92557.1     | Peroxiredoxin                                   | Peroxiredoxin                                   | ABP92557.1     | 145892052 | gb  | Streptococcus suis 98HAH33          |                                                |
| 93  | 1.65E-21 | 117618015 | ref | YP_855170.1    | thiol peroxidase                                | thiol peroxidase                                | YP_855170.1    | 117618015 | ref | Aeromonas hydrophilla subsp.        | VSFAGQNIFFSVDIPTCATSVRCISADAGSRFCGLDLVGLAARA   |
|     |          | 117559422 | gb  | ABK36370.1     | thiol peroxidase                                | thiol peroxidase                                | ABK36370.1     | 117559422 | gb  | Aeromonas hydrophilla subsp.        |                                                |
| 94  | 0        | 145295228 | ref | YP_001138049.1 | hypothetical protein cgr_1169                   | hypothetical protein cgr_1169                   | YP_001138049.1 | 145295228 | ref | Corynebacterium glutamicum R        | NIFPSVDTGYCATSVRASLENITCISKDALGRFQNVTLKGLARS   |
|     |          | 24212515  | gb  | Q8NRG3         | TPX_CORGL Probable thiol peroxidase             | TPX_CORGL Probable thiol peroxidase             | Q8NRG3         | 24212515  | gb  | Corynebacterium glutamicum ATCC     |                                                |
|     |          | 21323853  | dbj | BAB98479.1     | Peroxiredoxin                                   | Peroxiredoxin                                   | BAB98479.1     | 21323853  | dbj | Corynebacterium glutamicum R        |                                                |
|     |          | 140945148 | dbj | BAF54147.1     | hypothetical protein                            | hypothetical protein                            | BAF54147.1     | 140945148 | dbj | Corynebacterium glutamicum R        |                                                |
| 95  | 1.85E-12 | 163788159 | ref | ZP_02182605.1  | Peroxiredoxin                                   | Peroxiredoxin                                   | ZP_02182605.1  | 163788159 | ref | Flavobacteriales bacterium ALC-1    | NVTNVFPSVDTGTCAOSIRCISKDAMARFCFETLLSRCQVAEIA   |
|     |          | 159876479 | gb  | EDP70537.1     | Peroxiredoxin                                   | Peroxiredoxin                                   | EDP70537.1     | 159876479 | gb  | Flavobacteriales bacterium ALC-1    |                                                |
| 96  | 8.42E-11 | 116327207 | ref | YP_796927.1    | Peroxiredoxin                                   | Peroxiredoxin                                   | YP_796927.1    | 116327207 | ref | Leptospira borgpetersenii serovar   | QVTVAVPSWDTSVCALEITREKAAGLIISGDAMKRFCLKGLSARA  |
|     |          | 116332130 | ref | YP_801848.1    | Peroxiredoxin                                   | Peroxiredoxin                                   | YP_801848.1    | 116332130 | ref | Leptospira borgpetersenii serovar   |                                                |
|     |          | 116119951 | gb  | ABJ77994.1     | Peroxiredoxin                                   | Peroxiredoxin                                   | ABJ77994.1     | 116119951 | gb  | Leptospira borgpetersenii serovar   |                                                |
|     |          | 116125819 | gb  | ABJ77090.1     | Peroxiredoxin                                   | Peroxiredoxin                                   | ABJ77090.1     | 116125819 | gb  | Leptospira borgpetersenii serovar   |                                                |
| 97  | 8.96E-20 | 152995291 | ref | YP_001340126.1 | Redoxin domain protein                          | Redoxin domain protein                          | YP_001340126.1 | 152995291 | ref | Marinomonas sp. MWYL1               | TVTNIFPSVDTPTCATSVRESAASLCSADAAAARFCLTGLLSRA   |
|     |          | 150836215 | gb  | ABR70191.1     | Redoxin domain protein                          | Redoxin domain protein                          | ABR70191.1     | 150836215 | gb  | Marinomonas sp. MWYL1               |                                                |
| 98  | 4.31E-11 | 95930268  | ref | ZP_01313006.1  | Antioxidant Tpx                                 | Antioxidant Tpx                                 | ZP_01313006.1  | 95930268  | ref | Desulfuromonas acetoxidans DSM      | DSAKGKAVVPSIDTGVCDTMITRTISVDAQGRWCELIKLLARAETV |
|     |          | 95133731  | gb  | EAT15392.1     | Antioxidant Tpx                                 | Antioxidant Tpx                                 | EAT15392.1     | 95133731  | gb  | Desulfuromonas acetoxidans DSM      |                                                |
| 99  | 4.16E-18 | 160876278 | ref | YP_001555594.1 | Redoxin domain protein                          | Redoxin domain protein                          | YP_001555594.1 | 160876278 | ref | Shewanella baltica OS195            | TVTSAVPSLDTGVCAEQTKTISADAAQKRFCDYGLLARAIDAEGK  |
|     |          | 160861800 | gb  | ABX50334.1     | Redoxin domain protein                          | Redoxin domain protein                          | ABX50334.1     | 160861800 | gb  | Shewanella baltica OS195            |                                                |
| 100 | 3.69E-19 | 32267317  | ref | NP_861349.1    | thiol peroxidase                                | thiol peroxidase                                | NP_861349.1    | 32267317  | ref | Helicobacter hepaticus ATCC 51449   | KL TNVPSLDTGVCAEQTKTISADAAQKRFCDYGLLARAIDAEGK  |
|     |          | 32263370  | gb  | AAF78415.1     | thiol peroxidase                                | thiol peroxidase                                | AAF78415.1     | 32263370  | gb  | Helicobacter hepaticus ATCC 51449   |                                                |
| 101 | 8.59E-19 | 88713479  | ref | ZP_01107579.1  | thiol peroxidase                                | thiol peroxidase                                | ZP_01107579.1  | 88713479  | ref | Flavobacteriales bacterium          | TVTNIFPSIDTGTCAASVREAAELCISKDAQTRFCLQGLLSRS    |
|     |          | 88703007  | gb  | EAR00245.1     | thiol peroxidase                                | thiol peroxidase                                | EAR00245.1     | 88703007  | gb  | Flavobacteriales bacterium          |                                                |

|     |          |               |                |                                                            |                                        |                                                 |
|-----|----------|---------------|----------------|------------------------------------------------------------|----------------------------------------|-------------------------------------------------|
| 102 | 3.03E-14 | 28210514 ref  | NP_781458.1    | putative thiol peroxidase                                  | Clostridium tetani E88                 | SVTVGNELKSAIPSLDTPVCDLETKTISMDAQVRWCELGLLARA    |
| 103 |          | 28202951 gb   | AAO35395.1     | putative thiol peroxidase                                  | Clostridium tetani E88                 |                                                 |
|     | 4.35E-16 | 99912772 ref  | ZP_01319470.1  | hypothetical protein Bpset_03001036                        | Burkholderia pseudomallei 1655         | KVTNIVPSLDTPVCAAS TRVVSADAATRFYGVNVTLDGLAARA    |
| 104 | 1.76E-11 | 39995461 ref  | NP_951412.1    | thiol peroxidase                                           | Geobacter sulfurreducens PCA           | FGAAIKSAVPSLDTPVCAE TRTISLDAQKRWCVVTEMLLSRS     |
|     |          | 39982224 gb   | AAR33685.1     | thiol peroxidase                                           | Geobacter sulfurreducens PCA           |                                                 |
| 105 | 5.80E-18 | 91785251 ref  | YP_560457.1    | Putative thiol peroxidase_Tpx                              | Burkholderia xenovorans LB400          | NIVPSLDTPCATSTRVVSGBAASRFCEGIENVGVDLTGLTARA     |
|     |          | 91689205 gb   | ABE32405.1     | thiol peroxidase (atypical 2-Cys peroxiredoxin)            | Burkholderia xenovorans LB400          |                                                 |
| 106 | 2.15E-11 | 16765010 ref  | NP_460625.1    | putative thiol peroxidase                                  | Salmonella typhimurium LT2             | LGQEHAKPGILAEIGVVPVSLDTPVCEWQVKVLSMDAQAARFIVT   |
|     |          | 16420193 gb   | AAL20584.1     | putative thiol peroxidase                                  | Salmonella typhimurium LT2             |                                                 |
| 107 | 0        | 74316192 ref  | YP_313932.1    | thiol peroxidase-scavengase P20 oxidoreductase protein     | Thiobacillus denitrificans ATCC        | AVTNIVPSLDTPVYCATSTKIISADAMSRRFCRGAEFMLAGVTARA  |
|     |          | 74055687 gb   | AAZ96127.1     | thiol peroxidase-scavengase P20 oxidoreductase protein     | Thiobacillus denitrificans ATCC        |                                                 |
| 108 | 2.13E-15 | 107021678 ref | YP_620005.1    | Redoxin                                                    | Burkholderia cenocepacia AU 1054       | ASFAGKNIAPSLDTPTCATSTRVVSADAATRFCEGVDLNGLTARA   |
|     |          | 105891867 gb  | ABF75032.1     | thiol peroxidase (atypical 2-Cys peroxiredoxin)            | Burkholderia cenocepacia AU 1054       |                                                 |
| 109 | 4.45E-13 | 401698 sp     | P31308         | TPX_STRSA Probable thiol peroxidase                        | Streptococcus sanguinis                | SIIPSIDTGVCGSTQTRTVSVVDAGGKWCEGIEINAEWHLLARATVT |
|     |          | 153827 gb     | AAC98427.1     | 20-kDa protein                                             | Streptococcus sanguinis                |                                                 |
| 110 | 0        | 26990298 ref  | NP_745723.1    | thiol peroxidase                                           | Pseudomonas putida KT2440              | AGAQNIFPVSVDTPTCATSVRCISADAGARFCGLDLAAGLAARA    |
|     |          | 24985251 gb   | AAN69187.1     | AEO16553_2 thiol peroxidase                                | Pseudomonas putida KT2440              |                                                 |
| 111 | 0        | 60594471 pdb  | 1XVQ           | A Chain A, Crystal Structure Of Thiol Peroxidase From Myco | Mycobacterium tuberculosis             | NIFPVSVDTPVYCATSVRLVSKDAQKRFCEGIENVGVTMAGILLARA |
| 112 | 5.09E-17 | 163726135 ref | ZP_02133651.1  | Redoxin domain protein                                     | Desulfatibacillum alkenivorans AK-01   | PGFTLTNIFPSIDTGVCAMSVRCVSMDALGRFCGLDLAAGLFARS   |
|     |          | 161400527 gb  | EDQ24779.1     | Redoxin domain protein                                     | Desulfatibacillum alkenivorans AK-01   |                                                 |
| 113 | 9.31E-16 | 88796646 ref  | ZP_01112306.1  | Peroxiredoxin                                              | Alteromonas macleodii 'Deep            | NIFPSIDTGTCAMSVRCVVSADAAGRFCEGIENVGVTLTGLLSRS   |
|     |          | 88772030 gb   | EAR03335.1     | Peroxiredoxin                                              | Alteromonas macleodii 'Deep            |                                                 |
| 114 | 1.35E-19 | 15640841 ref  | NP_230472.1    | tagD protein                                               | Vibrio cholerae O1 biovar eltor str.   | TVTSIFPSIDTPVSKSVKCVSADAMSRRFCVAVNVTLRGLAARA    |
|     |          | 121585671 ref | ZP_01675466.1  | tagD protein                                               | Vibrio cholerae 2740-80                |                                                 |
|     |          | 153220677 ref | ZP_01951788.1  | tagD protein                                               | Vibrio cholerae MAK 757                |                                                 |
|     |          | 153822028 ref | ZP_01974695.1  | tagD protein                                               | Vibrio cholerae B33                    |                                                 |
|     |          | 12644011 sp   | P39167         | TPX_VIBCH Probable thiol peroxidase (Protein tagD)         |                                        |                                                 |
|     |          | 13377548 gb   | AAK20781.1     | AF325734_7 toxR-activated gene D protein                   |                                        |                                                 |
|     |          | 9655275 gb    | AAF93987.1     | tagD protein                                               | Vibrio cholerae                        |                                                 |
|     |          | 121550034 gb  | EAX60050.1     | tagD protein                                               | Vibrio cholerae O1 biovar eltor str.   |                                                 |
|     |          | 124120241 gb  | EAY38984.1     | tagD protein                                               | Vibrio cholerae 2740-80                |                                                 |
|     |          | 125619704 gb  | EAZ48231.1     | tagD protein                                               | Vibrio cholerae MAK 757                |                                                 |
|     |          | 126520422 gb  | EAZ77645.1     | tagD protein                                               | Vibrio cholerae MO10                   |                                                 |
|     |          |               |                |                                                            | Vibrio cholerae B33                    |                                                 |
| 115 | 0        | 16122566 ref  | NP_405879.1    | thiol peroxidase                                           | Yersinia pestis CO92                   | SSFAGKNIFPSIDTGVCAASVRCISSDAQSRFCGVALAGLTARA    |
|     |          | 51596585 ref  | YP_070776.1    | thiol peroxidase                                           | Yersinia pseudotuberculosis IP         |                                                 |
|     |          | 108907686 ref | YP_651602.1    | thiol peroxidase                                           | Yersinia pestis Antiqua                |                                                 |
|     |          | 108811964 ref | YP_647731.1    | thiol peroxidase                                           | Yersinia pestis Nepal516               |                                                 |
|     |          | 145598106 ref | YP_001162182.1 | thiol peroxidase                                           | Yersinia pestis Pestoides F            |                                                 |
|     |          | 149365746 ref | ZP_01887781.1  | thiol peroxidase                                           | Yersinia pestis CA88-4125              |                                                 |
|     |          | 153950251 ref | YP_001400770.1 | thiol peroxidase                                           | Yersinia pseudotuberculosis IP         |                                                 |
|     |          | 161484811 ref | NP_669305.2    | thiol peroxidase                                           | Yersinia pestis KIM                    |                                                 |
|     |          | 161511374 ref | NP_993461.2    | thiol peroxidase                                           | Yersinia pestis biovar Microtus str.   |                                                 |
|     |          | 165926488 ref | ZP_02222320.1  | thiol peroxidase                                           | Yersinia pestis biovar Orientalis str. |                                                 |
|     |          | 165938567 ref | ZP_02227123.1  | thiol peroxidase                                           | Yersinia pestis biovar Orientalis str. |                                                 |

|           |          |               |                                                   |                                        |                                                   |
|-----------|----------|---------------|---------------------------------------------------|----------------------------------------|---------------------------------------------------|
| 166010740 | ref      | ZP_02231638.1 | thiol peroxidase                                  | Yersinia pestis biovar Antiqua str.    | Yersinia pestis biovar Antiqua str.               |
| 24212520  | sp       | Q8ZE42        | TPX_YERPE Probable thiol peroxidase               | Yersinia pestis                        |                                                   |
| 51583867  | emb      | CAH21499.1    | thiol peroxidase                                  | Yersinia pseudotuberculosis IP         |                                                   |
| 108775612 | gb       | ABG18131.1    | thiol peroxidase (atypical 2-Cys peroxidoredoxin) | Yersinia pestis Nepal516               |                                                   |
| 108773599 | gb       | ABG13657.1    | thiol peroxidase (atypical 2-Cys peroxidoredoxin) | Yersinia pestis Antiqua                |                                                   |
| 115343045 | emb      | CAL20970.1    | thiol peroxidase                                  | Yersinia pestis CO82                   |                                                   |
| 145203802 | gb       | ABP39209.1    | thiol peroxidase (atypical 2-Cys peroxidoredoxin) | Yersinia pestis Pestiloides F          |                                                   |
| 149292159 | gb       | EDM42233.1    | thiol peroxidase                                  | Yersinia pestis CA88-4125              |                                                   |
| 152961746 | gb       | ABS49207.1    | thiol peroxidase                                  | Yersinia pseudotuberculosis IP         |                                                   |
| 165913441 | gb       | EDR32062.1    | thiol peroxidase                                  | Yersinia pestis biovar Orientalis str. |                                                   |
| 165921709 | gb       | EDR38906.1    | thiol peroxidase                                  | Yersinia pestis biovar Orientalis str. |                                                   |
| 165990442 | gb       | EDR42743.1    | thiol peroxidase                                  | Yersinia pestis biovar Antiqua str.    |                                                   |
| 116       | 0        | 86142622      | ref                                               | Flavobacterium sp. MED217              | GNTNIFPSVDTGVCAASVRCISRDAAQRFCGLENVFAGLHSRV       |
|           |          | 85830654      | gb                                                | Leeuwenhoekella blandensis             |                                                   |
|           |          |               |                                                   |                                        |                                                   |
| 117       | 0        | 16760205      | ref                                               | Salmonella enterica subsp. enterica    | PVTNIFPSIDTGVCAASVRCVSADAAQSRFCYGYEIVLKGGLAARA    |
|           |          | 29142026      | ref                                               | Salmonella enterica subsp. enterica    |                                                   |
|           |          | 24212519      | sp                                                | Salmonella enterica subsp. enterica    |                                                   |
|           |          | Q8Z7A8        | TFX_SALTI Probable thiol peroxidase               | Salmonella enterica subsp. enterica    |                                                   |
|           |          | 25311474      | pir                                               | Salmonella enterica subsp. enterica    |                                                   |
|           |          | 16502500      | emb                                               | Salmonella enterica subsp. enterica    |                                                   |
|           |          | 29137655      | gb                                                | Salmonella enterica subsp. enterica    |                                                   |
|           |          |               |                                                   |                                        |                                                   |
| 118       | 0        | 153885870     | ref                                               | Raistonia pickettii T2D                | VGADLKNIVPSLDTPVCAATSTRISADAAAGRCFVGVDLAGVTARA    |
|           |          | 15157792      | gb                                                | Raistonia pickettii T2D                |                                                   |
|           |          |               |                                                   |                                        |                                                   |
| 119       | 3.88E-22 | 86157255      | ref                                               | Anaeromyxobacter dehalogenans          | VGAKAPDVNIVPSLDTAVCATSTRVVSADAKRFCLAGLTARA        |
|           |          | 85773766      | gb                                                | Anaeromyxobacter dehalogenans          |                                                   |
|           |          |               |                                                   |                                        |                                                   |
| 120       | 1.86E-11 | 78776829      | ref                                               | Sulfitrimonas denitrificans DSM 1251   | KVTATAIGTVTVPSLDTDTCAAETRVVSMDSERFCLQGLSARA       |
|           |          | 78497369      | gb                                                | Sulfitrimonas denitrificans DSM 1251   |                                                   |
|           |          |               |                                                   |                                        |                                                   |
| 121       | 1.04E-19 | 88603028      | ref                                               | Polaribacter igensis Z3-P              | NIFPSLDTGTCAASVRSAAELKCIKDAQARFCGKTLYLH5RA        |
|           |          | 88781886      | gb                                                | Polaribacter igensis Z3-P              |                                                   |
|           |          |               |                                                   |                                        |                                                   |
| 122       | 0        | 77953048      | ref                                               | Yersinia bercovieri ATCC 43970         | PVTNIFPSIDTGVCAASVRCISSDAQSRFCRGADFKLAGLTARA      |
|           |          |               |                                                   |                                        |                                                   |
| 123       | 6.98E-15 | 138896327     | ref                                               | Geobacillus thermodenitrificans        | MMANVTEVTSVPSLDTGVCDAAQIRTISVDQAQRWCELRLRAY       |
|           |          | 134267840     | gb                                                | Geobacillus thermodenitrificans        |                                                   |
|           |          |               |                                                   |                                        |                                                   |
| 124       | 7.76E-15 | 84393654      | ref                                               | Vibrio splendidus 12B01                | NIFPSIDTATCATSVRCISADAAAGRFCEGIEGYLASELTTTRAVVT   |
|           |          | 84375722      | gb                                                | Vibrio splendidus 12B01                |                                                   |
|           |          |               |                                                   |                                        |                                                   |
| 125       | 1.24E-14 | 152991671     | ref                                               | Sulfurovum sp. NBC37-1                 | VGGEGKVAVPSLDTGVGDAAEIRGLDITVSMIDAAARWCLAGVLAFLAF |
|           |          | 151423532     | dbj                                               | Sulfurovum sp. NBC37-1                 |                                                   |
|           |          |               |                                                   |                                        |                                                   |
| 126       | 2.66E-14 | 118047272     | ref                                               | Chloroflexus aggregans DSM 9485        | EVTTSVPSLDTGVCSKQITTAARLAGQATVSADAAQARWCGGMATC    |
|           |          | 117996196     | gb                                                | Chloroflexus aggregans DSM 9485        |                                                   |
|           |          |               |                                                   |                                        |                                                   |
| 127       | 1.47E-16 | 77405840      | ref                                               | Streptococcus agalactiae H36B          | KDFEGKSVVPSIDTGVCSKQIRTVSMIDAKRWCGLDEWHLLTR       |
|           |          | 77175550      | gb                                                | Streptococcus agalactiae H36B          |                                                   |
|           |          |               |                                                   |                                        |                                                   |
| 128       | 2.76E-19 | 21673584      | ref                                               | Chlorobium tepidum TLS                 | NIFPSLDTAVCAASVRCISADAAQGRFCGLTLKGLLSRALYAEQV     |
|           |          | 25091430      | sp                                                | Chlorobium tepidum TLS                 |                                                   |
|           |          | 21646697      | gb                                                | Chlorobium tepidum TLS                 |                                                   |
|           |          |               |                                                   |                                        |                                                   |
| 129       | 0        | 115375795     | ref                                               | Stigmatella aurantiaca DW4/3-1         | NIFPSIDTGVCATSVRGVTVNVSMDALKRFFCLTGLYSRAIGQEPN    |
|           |          | 115367183     | gb                                                | Stigmatella aurantiaca DW4/3-1         |                                                   |

|     |          |                |                |                                                 |                                      |                                                |
|-----|----------|----------------|----------------|-------------------------------------------------|--------------------------------------|------------------------------------------------|
| 130 | 5.66E-17 | 84356766 ref   | ZP_00981602.1  | COG2077: Peroxiredoxin                          | Burkholderia cenocepacia PC184       | ASFAGKNIIVPSLDTPTTCATSTRVVSADAATRFQGVDLNGLTARA |
|     |          | 1166883624 ref | YP_834247.1    | Redoxin domain protein                          | Burkholderia cenocepacia HI2424      |                                                |
|     |          | 118714030 ref  | ZP_01566591.1  | Redoxin                                         | Burkholderia cenocepacia MCO-3       |                                                |
|     |          | 116646713 gb   | ABK07354.1     | thiol peroxidase (atypical 2-Cys peroxiredoxin) | Burkholderia cenocepacia HI2424      |                                                |
|     |          | 118648445 gb   | EAV56249.1     | Redoxin                                         | Burkholderia cenocepacia MCO-3       |                                                |
|     |          | 124871163 gb   | EAY62879.1     | Alkyl hydroperoxide reductase                   | Burkholderia cenocepacia PC184       |                                                |
| 131 | 9.04E-21 | 74312309 ref   | YP_310728.1    | thiol peroxidase                                | Shigella sonnei Ss046                | DVTNIFPSIDTDVCAASVRCISADAQSRFCEGLNNVLKGLAARA   |
|     |          | 73855786 gb    | AAZ88493.1     | thiol peroxidase                                | Shigella sonnei Ss046                |                                                |
| 132 | 0        | 15602685 ref   | NP_245757.1    | Tpx                                             | Pasteurella multocida subsp.         | TVSAKNIFPSIDTGICATSVRAQAQRFCEGLENVGVDLAGLTARA  |
|     |          | 13431941 sp    | P57880         | TPX_PASMU Probable thiol peroxidase             | Pasteurella multocida subsp.         |                                                |
|     |          | 12721127 gb    | AAK02904.1     | Tpx                                             | Pasteurella multocida subsp.         |                                                |
| 133 | 1.52E-16 | 22537289 ref   | NP_688140.1    | thiol peroxidase                                | Streptococcus agalactiae 2603/VR     | KDFEGKSVVPSIDTGICSKQTRTVSMDAQRWCVGLDEWHLLTR    |
|     |          | 76786793 ref   | YP_329835.1    | thiol peroxidase                                | Streptococcus agalactiae A909        |                                                |
|     |          | 77410567 ref   | ZP_00786928.1  | thiol peroxidase                                | Streptococcus agalactiae CJB111      |                                                |
|     |          | 7413023 ref    | ZP_00789225.1  | thiol peroxidase                                | Streptococcus agalactiae 515         |                                                |
|     |          | 60390726 sp    | Q8DZH0         | TPX_STRAS Probable thiol peroxidase             | Streptococcus agalactiae 2603/VR     |                                                |
|     |          | 22534158 gb    | AAN0013.1      | AE014243_19 thiol peroxidase                    | Streptococcus agalactiae A909        |                                                |
|     |          | 76661850 gb    | ABA44434.1     | thiol peroxidase                                | Streptococcus agalactiae 515         |                                                |
|     |          | 77160921 gb    | EA072030.1     | thiol peroxidase                                | Streptococcus agalactiae CJB111      |                                                |
|     |          | 77163515 gb    | EA074465.1     | thiol peroxidase                                | Streptococcus agalactiae CJB111      |                                                |
| 134 | 3.86E-12 | 94987038 ref   | YP_594971.1    | Peroxiredoxin                                   | Lawsonia intracellularis PHE/IMN1-00 | SAVPSLDTGVCDJETQTSQDAQARWCVSAVEITELRLARAVVD    |
|     |          | 94731287 emb   | CAJ54650.1     | Peroxiredoxin                                   | Lawsonia intracellularis PHE/IMN1-00 |                                                |
| 135 | 0        | 119860085 ref  | ZP_01641490.1  | Redoxin                                         | Pseudomonas putida W619              | QVTNIFPSVDPTTCATSVRCISADAQAQRFCEGLENVLAGLAARA  |
|     |          | 119813595 gb   | EAX16366.1     | Redoxin                                         | Pseudomonas putida W619              |                                                |
| 136 | 2.75E-16 | 32473192 ref   | NP_866186.1    | probable thiol peroxidase                       | Rhodopirellula baltica SH 1          | ELAVGQSVPSLDTPTTCATQTKTVSRDQAQRFCEKLLSRAEVT    |
|     |          | 32397871 emb   | CAD73872.1     | probable thiol peroxidase                       | Rhodopirellula baltica SH 1          |                                                |
| 137 | 1.58E-13 | 116749769 ref  | YP_846456.1    | Redoxin domain protein                          | Syntrophobacter fumaroxidans         | AVTKGAPLTSVPSLDTFVCDMETRTVSMDAQKRWCELLRAR      |
|     |          | 116698833 gb   | ABK18021.1     | thiol peroxidase (atypical 2-Cys peroxiredoxin) | Syntrophobacter fumaroxidans         |                                                |
| 138 | 4.97E-11 | 24213562 ref   | NP_711043.1    | thiol peroxidase                                | Leptospira interrogans serovar Lai   | VAVPSLDTVCGALEIKKAAAGIGTVISGDAMGRFCKLGLSARA    |
|     |          | 45658599 ref   | YP_002685.1    | thiol peroxidase                                | Leptospira interrogans serovar       |                                                |
|     |          | 73919883 sp    | Q7ZNR4         | TPX_LEPIC Probable thiol peroxidase             | Leptospira interrogans serovar Lai   |                                                |
|     |          | 73919884 sp    | Q8F7T2         | TPX_LEPIN Probable thiol peroxidase             | Leptospira interrogans serovar       |                                                |
|     |          | 24194350 gb    | AAN48061.1     | AE011271_1 thiol peroxidase                     | Leptospira interrogans serovar       |                                                |
|     |          | 45601843 gb    | AAS71322.1     | thiol peroxidase                                | Leptospira interrogans serovar       |                                                |
| 139 | 1.51E-16 | 77409767 ref   | ZP_00786422.1  | thiol peroxidase                                | Streptococcus agalactiae COH1        | KDFEGKSVVPSIDTGICSKQTRTVSMDAQRWCVGLDEWHLLTR    |
|     |          | 77171627 gb    | EA07484.1      | thiol peroxidase                                | Streptococcus agalactiae COH1        |                                                |
| 140 | 1.50E-19 | 150025644 ref  | YP_001296470.1 | Thiol peroxidase                                | Flavobacterium psychrophilum         | SVTNIFPSVDGTGTCASVRSRGLENTCISRDAQKRFCLAGLHSRV  |
|     |          | 149772185 emb  | CAL43661.1     | Thiol peroxidase                                | Flavobacterium psychrophilum         |                                                |
| 141 | 8.11E-20 | 153608277 ref  | ZP_01960945.1  | hypothetical protein BACCAC_02565               | Bacteroides caccae ATCC 43185        | NIFPSLDTSVCATSVRAISKDAHGRFCEGIEINVGYRLAGLLARA  |
|     |          | 149129180 gb   | EDM20396.1     | hypothetical protein BACCAC_02565               | Bacteroides caccae ATCC 43185        |                                                |
| 142 | 1.30E-19 | 125622459 gb   | EAZ50779.1     | tagD protein                                    | Vibrio cholerae V51                  | TVTSIFPSIDTPVCSKSVKCVKADAMSRFCVAVNVTLRGLAARA   |
| 143 | 2.87E-10 | 59714072 ref   | YP_206847.1    | TagD-like protein/thioperoxidase                | Vibrio fischeri ES114                | SVTYTYPVSDTPVCSKSLVCISADATNFRFCRSENFTRGLAARS   |
|     |          | 59482320 gb    | AAW87959.1     | TagD-like protein/thioperoxidase                | Vibrio fischeri ES114                |                                                |

|     |          |           |     |                |                                                               |                           |  |  |                                     |                                                 |
|-----|----------|-----------|-----|----------------|---------------------------------------------------------------|---------------------------|--|--|-------------------------------------|-------------------------------------------------|
| 144 | 0        | 50642076  | ref | YP_055303.1    | thiol peroxidase                                              |                           |  |  | Propionibacterium acnes             | NIFPSVDTGYCATSVREKAAGLCVSRDAQARFCGVTMQHLLAR/    |
|     |          | 50839678  | gb  | AA182345.1     | thiol peroxidase                                              |                           |  |  | Propionibacterium acnes             |                                                 |
| 145 | 0        | 34541358  | ref | NP_905837.1    | thiol peroxidase                                              |                           |  |  | Porphyromonas gingivalis W83        | NIFPSIDTGVCAASVRCLSKDAQARFCGLDLKGLLARAFAAIAA    |
|     |          | 34397675  | gb  | AAQ66736.1     | thiol peroxidase                                              |                           |  |  | Porphyromonas gingivalis W83        |                                                 |
| 146 | 1.69E-11 | 16760220  | ref | NP_455837.1    | putative thiol peroxidase                                     |                           |  |  | Salmonella enterica subsp. enterica | LQGEHAKPGIAEGVVVPSLDTVPCEVQVKVLSMDAQRFFIVT      |
|     |          | 25512703  | pir | AF0661         | probable thiol peroxidase                                     | STY1397                   |  |  | Salmonella enterica subsp. enterica |                                                 |
|     |          | 16502515  | emb | CAD01663.1     | putative thiol peroxidase                                     |                           |  |  | Salmonella enterica subsp. enterica |                                                 |
| 147 | 3.05E-12 | 16803623  | ref | NP_465108.1    | hypothetical protein lmo1583                                  |                           |  |  | Listeria monocytogenes EGD-e        | VGTERKEVTSVPSIDTSCVSTQTRTISVDAQKKWCCELRLARS     |
|     |          | 24212518  | sp  | Q8Y6U8         | TPX_LISMO                                                     | Probable thiol peroxidase |  |  | Listeria monocytogenes              |                                                 |
|     |          | 16411012  | emb | CAC99661.1     | lmo1583                                                       |                           |  |  | Listeria monocytogenes              |                                                 |
| 148 | 0        | 11846343  | ref | YP_881959.1    | thiol peroxidase                                              |                           |  |  | Mycobacterium avium 104             | NIFPSIDTVCATSVRAGAGATNYSKDAQARFCGVTMAGLLARA     |
|     |          | 118164700 | gb  | ABK65597.1     | thiol peroxidase                                              |                           |  |  | Mycobacterium avium 104             |                                                 |
| 149 | 5.04E-19 | 86132173  | ref | ZP_01060768.1  | thiol peroxidase                                              |                           |  |  | Cellulophaga sp. MED134             | NIFPSVDTGYCAQSVRSSAENTCISRDAQARFCGVTDFGLHSRA    |
|     |          | 85617092  | gb  | EAQ38275.1     | thiol peroxidase                                              |                           |  |  | Dokdonia donghaensis MED134         |                                                 |
| 150 | 4.75E-14 | 114563967 | ref | YP_751481.1    | Redoxin domain protein                                        |                           |  |  | Shewanella frigidimarina NCIMB 400  | PSFAGESAVPSIDTGVCAQLTKTISEDQAKRFCDRGLLARS/LVT   |
|     |          | 114333260 | gb  | ABI72642.1     | Redoxin domain protein                                        |                           |  |  | Shewanella frigidimarina NCIMB 400  |                                                 |
| 151 | 2.37E-19 | 163783283 | ref | ZP_02178276.1  | thiol peroxidase                                              |                           |  |  | Hydrogenivirga sp. 128-5-R1-1       | TVTGGAQGKITVPSLIDTVPCEIETKVVSMDAEKRFCLKGILARA   |
|     |          | 159881391 | gb  | EDP74902.1     | thiol peroxidase                                              |                           |  |  | Hydrogenivirga sp. 128-5-R1-1       |                                                 |
| 152 | 0        | 146282533 | ref | YP_001172686.1 | thiol peroxidase                                              |                           |  |  | Pseudomonas stutzeri A1501          | EVTNIFPSVDTPTCATSVRCSISADADAQKRFRCGAPELLAGVAARA |
|     |          | 145570738 | gb  | ABP79844.1     | thiol peroxidase                                              |                           |  |  | Pseudomonas stutzeri A1501          |                                                 |
| 153 | 1.06E-16 | 57241254  | ref | ZP_00369201.1  | thiol peroxidase                                              |                           |  |  | Campylobacter lari RM2100           | ISVPSLIDTVPVCATEARVVSMDBAMGRFCLEGILARAEVTEFFGQ  |
|     |          | 57018175  | gb  | EAL54950.1     | thiol peroxidase                                              |                           |  |  | Campylobacter lari RM2100           |                                                 |
| 154 | 0        | 161503231 | ref | YP_001570343.1 | hypothetical protein SARI_01299                               |                           |  |  | Salmonella enterica subsp. arizonae | PVTNIFPSIDTGVCAASVRCVSADADAQSRFCYGYEITLKGLAARA  |
|     |          | 160864578 | gb  | ABX21201.1     | hypothetical protein SARI_01299                               |                           |  |  | Salmonella enterica subsp. arizonae |                                                 |
| 155 | 2.41E-15 | 86148258  | ref | ZP_01066554.1  | Alkyl hydroperoxide reductase/ Thiol specific antioxidant/ Ma |                           |  |  | Vibrio sp. MED222                   | NIFPSIDTATCATSVRCSISADAAGRFCGIEGVL SGLTTRAVT    |
|     |          | 85633954  | gb  | EAQ52116.1     | Alkyl hydroperoxide reductase/ Thiol specific antioxidant/ Ma |                           |  |  | Vibrio sp. MED222                   |                                                 |
| 156 | 8.94E-13 | 57167777  | ref | ZP_00366917.1  | thiol peroxidase                                              |                           |  |  | Campylobacter coli RM2228           | EVGADLSLPSLIDTVPVCATEARNGAEVVMGRFCLEGLLARA/EV   |
|     |          | 57020899  | gb  | EAL57563.1     | thiol peroxidase                                              |                           |  |  | Campylobacter coli RM2228           |                                                 |
| 157 | 0        | 123442374 | ref | YP_001006353.1 | thiol peroxidase                                              |                           |  |  | Yersinia enterocolitica subsp.      | PVTSSFYGKNIFPSIDTGVCAASVRCISSDAQSRFCLAGLARA     |
|     |          | 122089335 | emb | CAL12183.1     | thiol peroxidase                                              |                           |  |  | Yersinia enterocolitica subsp.      |                                                 |
| 158 | 0        | 148547406 | ref | YP_001267508.1 | Redoxin domain protein                                        |                           |  |  | Pseudomonas putida F1               | AGAQAPNIFPSVDIPTCATSVRCSISADADAQARFCGLDLAAGLARA |
|     |          | 148511464 | gb  | ABQ78324.1     | thiol peroxidase (atypical 2-Cys peroxidoredoxin)             |                           |  |  | Pseudomonas putida F1               |                                                 |
| 159 | 1.50E-15 | 154687070 | ref | YP_001422231.1 | Tpx                                                           |                           |  |  | Bacillus amyloliquefaciens FZB42    | GGAVTLKVTSVPSIDTGVGDAQTRTISADAQARWCCELRLARS     |
|     |          | 154352921 | gb  | ABS75000.1     | Tpx                                                           |                           |  |  | Bacillus amyloliquefaciens FZB42    |                                                 |
| 160 | 0        | 110598477 | ref | ZP_01386748.1  | Alkyl hydroperoxide reductase/ Thiol specific antioxidant/ Ma |                           |  |  | Chlorobium ferrooxidans DSM 13031   | NAAETINIFPSLIDTVPVCAASVRCISADAHKRFRCVTLKGLLSRA  |
|     |          | 110339927 | gb  | EAT58431.1     | Alkyl hydroperoxide reductase/ Thiol specific antioxidant/ Ma |                           |  |  | Chlorobium ferrooxidans DSM 13031   |                                                 |
| 161 | 3.15E-14 | 126651361 | ref | ZP_01723568.1  | thiol peroxidase (superoxide-inducible protein 8)             |                           |  |  | Bacillus sp. B14905                 | SVVPSLIDTGVCDQAQITREAAANLGTVSDAQKRWCELRL TRAKV  |
|     |          | 126591890 | gb  | EAZ85973.1     | thiol peroxidase (superoxide-inducible protein 8)             |                           |  |  | Bacillus sp. B14905                 |                                                 |
| 162 | 0        | 42628789  | ref | ZP_00154345.1  | COG2077: Peroxiredoxin                                        |                           |  |  | Haemophilus influenzae R2846        | NIFPSIDTGVCATSVRCSISADAQARFCGIEIENAGVDLAGLTSRA  |
|     |          | 148826605 | ref | YP_001291358.1 | phosphoribosylformylglycinamide synthase                      |                           |  |  | Haemophilus influenzae PflEE        |                                                 |

|     |          |           |     |                |                                                               |                                      |                                                |  |
|-----|----------|-----------|-----|----------------|---------------------------------------------------------------|--------------------------------------|------------------------------------------------|--|
|     |          | 148716766 | gb  | ABQ98975.1     | phosphoribosylformylglycinamide synthase                      | Haemophilus influenzae PttEE         |                                                |  |
| 163 | 8.39E-13 | 118475243 | ref | YP_892893.1    | thiol peroxidase                                              | Campylobacter fetus subsp. fetus 82- | NVTVVVPSLDTGVCAAEARIISMDAMGRFCEGIENLLEGLLTRA   |  |
|     |          | 118414469 | gb  | ABK82889.1     | thiol peroxidase                                              | Campylobacter fetus subsp. fetus 82- |                                                |  |
| 164 | 0        | 104781760 | ref | YP_608258.1    | thiol peroxidase                                              | Pseudomonas entomophila L48          | QVTNIFPSVDTPTCATSVRCISADAAQARFCEGIENVLAGLAARA  |  |
|     |          | 95110747  | emb | CAK15460.1     | thiol peroxidase                                              | Pseudomonas entomophila L48          |                                                |  |
| 165 | 0        | 83746799  | ref | ZP_00943847.1  | Thioredoxin peroxidase                                        | Ralstonia solanacearum UW551         | VGAKAPNIVPSLDTPYCATSTRSISADAAAGRFCEGVDLGLTARA  |  |
|     |          | 83726566  | gb  | EAP73698.1     | Thioredoxin peroxidase                                        | Ralstonia solanacearum UW551         |                                                |  |
| 166 | 3.47E-18 | 123457052 | ref | XP_001316257.1 | thiol peroxidase, putative                                    | Trichomonas vaginalis G3             | TAFAQGTKLNIFFSMDTGVCAASVRCISKDAQGRFCLEGLLARS   |  |
|     |          | 121899958 | gb  | EAY04034.1     | thiol peroxidase, putative                                    | Trichomonas vaginalis G3             |                                                |  |
| 167 | 0        | 145636696 | ref | ZP_01792363.1  | hypothetical protein CGSHIHH_03808                            | Haemophilus influenzae PttHH         | NIFPSIDTGVCATSVRCISADAAQARFCEGIENAGVDLGLTSRA   |  |
|     |          | 145640835 | ref | ZP_01796417.1  | probable thiol peroxidase                                     | Haemophilus influenzae R3021         |                                                |  |
|     |          | 145270222 | gb  | EDK10158.1     | hypothetical protein CGSHIHH_03808                            | Haemophilus influenzae PttHH         |                                                |  |
|     |          | 145274349 | gb  | EDK14213.1     | probable thiol peroxidase                                     | Haemophilus influenzae 22.4-21       |                                                |  |
| 168 | 1.43E-12 | 162447212 | ref | YP_001620344.1 | peroxiredoxin family protein                                  | Acholeplasma laidlawii PG-8A         | AVDSAVPSLDTSVCDIQTRTISNDAAQKRWGNGLEITELRLARS   |  |
|     |          | 161985319 | gb  | ABX80968.1     | peroxiredoxin family protein                                  | Acholeplasma laidlawii PG-8A         |                                                |  |
| 169 | 2.64E-12 | 16800693  | ref | NP_470961.1    | hypothetical protein lin1625                                  | Listeria innocua Clp11262            | VGTERKEVTSVVPSIDTSCVCSQTQTRTISVDQAKKWCELRLLARS |  |
|     |          | 24212522  | sp  | Q92BC5         | TPX_LISIN Probable thiol peroxidase                           | Listeria innocua                     |                                                |  |
|     |          | 16414112  | emb | CAC96856.1     | lin1625                                                       | Listeria innocua                     |                                                |  |
| 170 | 4.43E-21 | 157155990 | ref | YP_001462632.1 | thiol peroxidase                                              | Escherichia coli E24377A             | DVTNIFPSIDTGVCAVSVRCISADAAQGRFCEGLNNVLKGLAARA  |  |
|     |          | 157078020 | gb  | ABV17728.1     | thiol peroxidase                                              | Escherichia coli E24377A             |                                                |  |
| 171 | 0        | 118472640 | ref | YP_887783.1    | thiol peroxidase                                              | Mycobacterium smegmatis str. MC2     | EVTNIFPSVDTPVCATSVRCVSKDAQKRFCEGIENVMAGLLGRA   |  |
|     |          | 118173927 | gb  | ABK74823.1     | thiol peroxidase                                              | Mycobacterium smegmatis str. MC2     |                                                |  |
| 172 | 0        | 84387412  | ref | ZP_00990431.1  | thiol peroxidase                                              | Vibrio splendidus 12B01              | SVTELNNLTNIFPSIDTPTCAASVRCISADAMNRFCKGLSARA    |  |
|     |          | 84377665  | gb  | EAP94529.1     | thiol peroxidase                                              | Vibrio splendidus 12B01              |                                                |  |
| 173 | 2.95E-12 | 56964507  | ref | YP_176238.1    | thiol peroxidase                                              | Bacillus clausii KSM-K16             | EVTSVPSLDTGVCDQQQTRTISVDQAKRWCELRLLARSEAALEA   |  |
|     |          | 56910750  | dbj | BAD65277.1     | thiol peroxidase                                              | Bacillus clausii KSM-K16             |                                                |  |
| 174 | 2.41E-18 | 73542554  | ref | YP_297074.1    | Alkyl hydroperoxide reductase/ Thiol specific antioxidant/ Ma | Ralstonia eutropha JMP134            | NIVPSLDTPVCAQASRTTISADAMGRFCRGAEFKGVDLAGVTARA  |  |
|     |          | 72119967  | gb  | AAZ62230.1     | thiol peroxidase (atypical 2-Cys peroxiredoxin)               | Ralstonia eutropha JMP134            |                                                |  |
| 175 | 1.11E-16 | 146319037 | ref | YP_001198749.1 | thiol peroxidase                                              | Streptococcus suis 05ZYH83           | PVTSVPSIDTGCIDTQTRTISADAAQKRWCAAGLEDAEWNLLARA  |  |
|     |          | 145689843 | gb  | ABP90349.1     | Peroxioredoxin                                                | Streptococcus suis 05ZYH83           |                                                |  |
| 176 | 0        | 70730225  | ref | YP_259964.1    | thiol peroxidase                                              | Pseudomonas fluorescens Pf-5         | QVTNIFPSVDTPTCATSVRCISADAAQARFCEGIENVLAGLTARA  |  |
|     |          | 68344524  | gb  | AAV92130.1     | thiol peroxidase                                              | Pseudomonas fluorescens Pf-5         |                                                |  |
| 177 | 2.49E-15 | 42783821  | ref | NP_981068.1    | thiol peroxidase                                              | Bacillus cereus ATCC 10987           | SVVPSIDTGVCDAAQTRTISVDAQKRWCVVTELRLARAYVSEGT   |  |
|     |          | 42739751  | gb  | AAS43676.1     | thiol peroxidase                                              | Bacillus cereus ATCC 10987           |                                                |  |
| 178 | 1.86E-18 | 149001930 | ref | ZP_01826884.1  | thiol peroxidase                                              | Streptococcus pneumoniae SP14-       | VSFTGKSVVPSIDTGCISQTQTRGLDITVSMDAQKRWCEWHLLARA |  |
|     |          | 147759739 | gb  | EDK66729.1     | thiol peroxidase                                              | Streptococcus pneumoniae SP14-       |                                                |  |
| 179 | 1.28E-14 | 49483954  | ref | YP_041178.1    | putative thiol peroxidase                                     | Staphylococcus aureus subsp.         | VTLADSVVPSIDTGVCDQQQTRREGIVLTAKKRWCGDELRLARA   |  |
|     |          | 60390701  | sp  | Q6GFZ4         | TPX_STAAR Probable thiol peroxidase                           | Staphylococcus aureus subsp.         |                                                |  |
|     |          | 49242083  | emb | CAG40782.1     | putative thiol peroxidase                                     | Staphylococcus aureus subsp.         |                                                |  |
| 180 | 8.37E-19 | 23099648  | ref | NP_693114.1    | thioredoxin peroxidase                                        | Oceanobacillus ihenyensis HTE831     | NVTLGAEKSVVPSIDTGVCSFQTRTISMDAQKRWCELRLLSRA    |  |



|     |          |                                                                                                          |                                                                                          |  |                                                                                                                                                                                      |  |  |  |                                                                                                                                                                                  |                                                                                                                                                                                                                                                                                        |
|-----|----------|----------------------------------------------------------------------------------------------------------|------------------------------------------------------------------------------------------|--|--------------------------------------------------------------------------------------------------------------------------------------------------------------------------------------|--|--|--|----------------------------------------------------------------------------------------------------------------------------------------------------------------------------------|----------------------------------------------------------------------------------------------------------------------------------------------------------------------------------------------------------------------------------------------------------------------------------------|
|     |          |                                                                                                          |                                                                                          |  | TPX_OCEIH Probable thiol peroxidase<br>thioredoxin peroxidase                                                                                                                        |  |  |  | Oceanobacillus ihyenssis HTE831                                                                                                                                                  |                                                                                                                                                                                                                                                                                        |
|     |          |                                                                                                          |                                                                                          |  |                                                                                                                                                                                      |  |  |  |                                                                                                                                                                                  |                                                                                                                                                                                                                                                                                        |
| 181 | 7.02E-18 | 114321726 ref<br>114228120 gb                                                                            | Q8EPB7<br>BAC14149.1                                                                     |  | thiol peroxidase (atypical 2-Cys peroxiredoxin)<br>thiol peroxidase (atypical 2-Cys peroxiredoxin)                                                                                   |  |  |  | Alkalilimnicola ehrlichii MLHE-1<br>Alkalilimnicola ehrlichii MLHE-1                                                                                                             | LGGEPIGSTNIVPSLDTGVCSSTSAKTISADAQAKRFCTAGICARA                                                                                                                                                                                                                                         |
|     |          |                                                                                                          |                                                                                          |  |                                                                                                                                                                                      |  |  |  |                                                                                                                                                                                  |                                                                                                                                                                                                                                                                                        |
| 182 | 6.49E-19 | 78186605 ref<br>78166507 gb                                                                              | YP_374648.1<br>ABB23605.1                                                                |  | thiol peroxidase<br>thiol peroxidase (atypical 2-Cys peroxiredoxin)                                                                                                                  |  |  |  | Pelodictyon luteolum DSM 273<br>Pelodictyon luteolum DSM 273                                                                                                                     | LPAVGTNIFPSLDTAVCAASVRCISADAHNRCFGVTLKGLLSRA                                                                                                                                                                                                                                           |
| 183 | 1.35E-19 | 121726044 ref<br>147673729 ref<br>13377515 gb<br>407282 gb<br>121631526 gb<br>EAX63896.1<br>146315612 gb | ZP_01679343.1<br>YP_001216305.1<br>AAK20751.1<br>AA64918.1<br>EAX63896.1<br>ABQ20151.1   |  | tagD protein<br>tagD protein<br>AF325733_7 toxR-activated gene D protein<br>proposed tagD product<br>tagD protein<br>tagD protein                                                    |  |  |  | Vibrio cholerae V52<br>Vibrio cholerae O395<br>Vibrio cholerae<br>Vibrio cholerae V52<br>Vibrio cholerae O395                                                                    | TVTISIFPSIDIPVCSKSVKCVSADAMSRSFCVAVNVTLRGLAARA<br>TVTISIFPSIDIPVCSKSVKCVSADAMSRSFCVAVNVTLRGLAARA                                                                                                                                                                                       |
| 184 | 1.73E-19 | 153618066 ref<br>126511412 gb                                                                            | ZP_01970733.1<br>EAZ74006.1                                                              |  | tagD protein<br>tagD protein                                                                                                                                                         |  |  |  | Vibrio cholerae NCTC 8457<br>Vibrio cholerae NCTC 8457                                                                                                                           | TVTISIFPSIDIPVCSKSVKCVSADAMSRSFCVAVNVTLRGLAARA<br>TVTISIFPSIDIPVCSKSVKCVSADAMSRSFCVAVNVTLRGLAARA                                                                                                                                                                                       |
| 185 | 0        | 126355867 ref<br>126320377 gb                                                                            | ZP_01712873.1<br>EAZ71229.1                                                              |  | Redoxin domain protein<br>Redoxin domain protein                                                                                                                                     |  |  |  | Pseudomonas putida GB-1<br>Pseudomonas putida GB-1                                                                                                                               | QVTNIFPSVDPTTCATSVRCISADAQARFCEGLNVLGALAARA<br>QVTNIFPSVDPTTCATSVRCISADAQARFCEGLNVLGALAARA                                                                                                                                                                                             |
|     |          |                                                                                                          |                                                                                          |  |                                                                                                                                                                                      |  |  |  |                                                                                                                                                                                  |                                                                                                                                                                                                                                                                                        |
| 186 | 0        | 148827941 ref<br>148719183 gb                                                                            | YP_001292694.1<br>ABR00311.1                                                             |  | diaminopimelate epimerase<br>diaminopimelate epimerase                                                                                                                               |  |  |  | Haemophilus influenzae PHGG<br>Haemophilus influenzae PHGG                                                                                                                       | NIFFSIDTGVCATSVRCISADAQARFCEGIENAGVDLALSTRA<br>NIFFSIDTGVCATSVRCISADAQARFCEGIENAGVDLALSTRA                                                                                                                                                                                             |
|     |          |                                                                                                          |                                                                                          |  |                                                                                                                                                                                      |  |  |  |                                                                                                                                                                                  |                                                                                                                                                                                                                                                                                        |
| 187 | 6.01E-18 | 126175216 ref<br>153001542 ref<br>125998421 gb<br>151366160 gb                                           | YP_001051365.1<br>YP_001367223.1<br>ABN62496.1<br>ABS09160.1                             |  | Redoxin domain protein<br>Redoxin domain protein<br>Redoxin domain protein<br>Redoxin domain protein                                                                                 |  |  |  | Shewanella baltica OS155<br>Shewanella baltica OS185<br>Shewanella baltica OS155<br>Shewanella baltica OS185                                                                     | TVTSAVPSLDTGVCAALQTKTISADAQAKRFCDYGLLARDAEKG<br>TVTSAVPSLDTGVCAALQTKTISADAQAKRFCDYGLLARDAEKG<br>TVTSAVPSLDTGVCAALQTKTISADAQAKRFCDYGLLARDAEKG<br>TVTSAVPSLDTGVCAALQTKTISADAQAKRFCDYGLLARDAEKG                                                                                           |
| 188 | 5.42E-16 | 120598158 ref<br>124547089 ref<br>146293770 ref<br>120568251 gb<br>124503563 gb<br>145665460 gb          | YP_962732.1<br>ZP_01706048.1<br>YP_001184194.1<br>ABM24178.1<br>EAY53641.1<br>ABP76395.1 |  | Redoxin domain protein<br>Redoxin<br>Redoxin domain protein<br>Redoxin domain protein<br>Redoxin<br>Redoxin domain protein                                                           |  |  |  | Shewanella sp. W3-18-1<br>Shewanella putrefaciens 200<br>Shewanella putrefaciens CN-32<br>Shewanella sp. W3-18-1<br>Shewanella putrefaciens 200<br>Shewanella putrefaciens CN-32 | VDSAVPSLDTGVCAALQTKTISTDAQAKRFCDYGLLARDAEKG<br>VDSAVPSLDTGVCAALQTKTISTDAQAKRFCDYGLLARDAEKG<br>VDSAVPSLDTGVCAALQTKTISTDAQAKRFCDYGLLARDAEKG<br>VDSAVPSLDTGVCAALQTKTISTDAQAKRFCDYGLLARDAEKG<br>VDSAVPSLDTGVCAALQTKTISTDAQAKRFCDYGLLARDAEKG<br>VDSAVPSLDTGVCAALQTKTISTDAQAKRFCDYGLLARDAEKG |
| 189 | 1.79E-19 | 118594635 ref<br>118440413 gb                                                                            | ZP_01551982.1<br>EAV47040.1                                                              |  | Alkyl hydroperoxide reductase/ Thiol specific antioxidant/ Methylhydrophilates bacterium<br>Alkyl hydroperoxide reductase/ Thiol specific antioxidant/ Methylhydrophilates bacterium |  |  |  | Methylophilates bacterium<br>Methylophilates bacterium                                                                                                                           | QVTNIFPSVDPTTCALSVKICISADAQAKRFCLRGLTSRALIAEIT<br>QVTNIFPSVDPTTCALSVKICISADAQAKRFCLRGLTSRALIAEIT                                                                                                                                                                                       |
|     |          |                                                                                                          |                                                                                          |  |                                                                                                                                                                                      |  |  |  |                                                                                                                                                                                  |                                                                                                                                                                                                                                                                                        |
| 190 | 5.35E-12 | 57505388 ref<br>57016213 gb                                                                              | ZP_00371316.1<br>EAL52999.1                                                              |  | thiol peroxidase<br>thiol peroxidase                                                                                                                                                 |  |  |  | Campylobacter upsaliensis RM3195<br>Campylobacter upsaliensis RM3195                                                                                                             | LTMPSLDTPVCASEARKGAEMIGRFGVLLLEGLLARAFVKD<br>LTMPSLDTPVCASEARKGAEMIGRFGVLLLEGLLARAFVKD                                                                                                                                                                                                 |
| 191 | 6.35E-17 | 118033512 ref<br>117980827 gb                                                                            | ZP_01504955.1<br>EAU95222.1                                                              |  | Redoxin<br>Redoxin                                                                                                                                                                   |  |  |  | Burkholderia phymatum STM815<br>Burkholderia phymatum STM815                                                                                                                     | NIVPSLDTPTCATSTRVYSGDAATRFCEGIENGVGVDLTGLTARA<br>NIVPSLDTPTCATSTRVYSGDAATRFCEGIENGVGVDLTGLTARA                                                                                                                                                                                         |
| 192 | 1.91E-13 | 163849099 ref<br>163670382 gb                                                                            | YP_001637137.1<br>ABY36748.1                                                             |  | Redoxin domain protein<br>Redoxin domain protein                                                                                                                                     |  |  |  | Chloroflexus aurantiacus J-10-fl<br>Chloroflexus aurantiacus J-10-fl                                                                                                             | QVTSVPSLDTGVCSKQTTAARLAGQATVSADAQARWCGTAYC<br>QVTSVPSLDTGVCSKQTTAARLAGQATVSADAQARWCGTAYC                                                                                                                                                                                               |
|     |          |                                                                                                          |                                                                                          |  |                                                                                                                                                                                      |  |  |  |                                                                                                                                                                                  |                                                                                                                                                                                                                                                                                        |
| 193 | 0        | 120436526 ref<br>117578676 emb                                                                           | YP_862212.1<br>CAL67145.1                                                                |  | thiol peroxidase<br>thiol peroxidase                                                                                                                                                 |  |  |  | Gramella forsetii KTO803<br>Gramella forsetii KTO803                                                                                                                             | RVTNIFPSIDTGVCAATSVRCISRDAQAKRFVEGLENVFEGLLSRA<br>RVTNIFPSIDTGVCAATSVRCISRDAQAKRFVEGLENVFEGLLSRA                                                                                                                                                                                       |
| 194 | 1.79E-18 | 87118639 ref<br>86166273 gb                                                                              | ZP_01074538.1<br>EAQ67539.1                                                              |  | thiol peroxidase<br>thiol peroxidase                                                                                                                                                 |  |  |  | Marinomonas sp. MED121<br>Marinomonas sp. MED121                                                                                                                                 | VGAKAPNIFPSIDTPTCATSVRCVSDAAAARFPGVDLVALTSRA<br>VGAKAPNIFPSIDTPTCATSVRCVSDAAAARFPGVDLVALTSRA                                                                                                                                                                                           |
| 195 | 8.55E-14 | 78221407 ref<br>78192662 gb                                                                              | YP_383154.1<br>ABB30429.1                                                                |  | Alkyl hydroperoxide reductase/ Thiol specific antioxidant/ Methylhydrophilates bacterium<br>thiol peroxidase (atypical 2-Cys peroxiredoxin)                                          |  |  |  | Geobacter metallireducens GS-15<br>Geobacter metallireducens GS-15                                                                                                               | ALAVGDSAVPSLDTIPVCDTETRTVSMDAQKRWCEVTYAAVLAA<br>ALAVGDSAVPSLDTIPVCDTETRTVSMDAQKRWCEVTYAAVLAA                                                                                                                                                                                           |

|     |          |               |                |                                                                |                                     |                                                |
|-----|----------|---------------|----------------|----------------------------------------------------------------|-------------------------------------|------------------------------------------------|
| 196 | 1.33E-16 | 24374852 ref  | NP_718895.1    | antioxidant, AhpC/TSA family                                   | Shewanella oneidensis MR-1          | TVTSAVPSLDTGVCALQTKTISTDAQKRFCDYGLLARDAEKG     |
|     |          | 24349544 gb   | AAN56339.1     | AE015771_9 antioxidant, AhpC/TSA family                        | Shewanella oneidensis MR-1          |                                                |
| 197 | 0        | 77975346 ref  | ZP_00830882.1  | COG2077: Peroxiredoxin                                         | Yersinia frederiksenii ATCC 33641   | NIFPSIDTGVCAASVRCISSDAQSRFCVVTIRGAEFKLAGL TARA |
| 198 | 0        | 53714055 ref  | YP_100047.1    | putative thiol peroxidase                                      | Bacteroides fragilis YCH46          | NIFPSLDTGVCATSVRAISKDAQGRFCGEIENVGVRLAGLLARA   |
|     |          | 60682249 ref  | YP_212393.1    | putative thiol peroxidase                                      | Bacteroides fragilis NCTC 9343      |                                                |
|     |          | 52216920 dbj  | BAD49513.1     | putative thiol peroxidase                                      | Bacteroides fragilis YCH46          |                                                |
|     |          | 60483683 emb  | CAH08472.1     | putative thiol peroxidase                                      | Bacteroides fragilis NCTC 9343      |                                                |
| 199 | 2.47E-14 | 51894101 ref  | YP_076792.1    | thioredoxin peroxidase                                         | Symbiobacterium thermophilum IAM    | SSVPSLDTGVCDTQTRTISADAQKRWCQGVDSKAYGTAALAAAR   |
|     |          | 51857790 dbj  | BAD41948.1     | thioredoxin peroxidase                                         | Symbiobacterium thermophilum IAM    |                                                |
| 200 | 5.63E-22 | 91775593 ref  | YP_545349.1    | alkyl hydroperoxide reductase/ Thiol specific antioxidant/ Maf | Methylobacillus flagellatus KT      | TVTNIFPSIDTPTCATSVRCISADAGSRFCGLENVLAGL TARA   |
|     |          | 91709580 gb   | ABE49508.1     | thiol peroxidase (atypical 2-Cys peroxiredoxin)                | Methylobacillus flagellatus KT      |                                                |
| 201 | 5.04E-16 | 117919654 ref | YP_868846.1    | Redoxin domain protein                                         | Shewanella sp. ANA-3                | TVTSAVPSLDTGVCALQTKTISTDAQKRFCDYGLLARDAE GQ    |
|     |          | 117611986 gb  | ABK47440.1     | Redoxin domain protein                                         | Shewanella sp. ANA-3                |                                                |
| 202 | 0        | 163756957 ref | ZP_02164064.1  | Redoxin                                                        | Kordia algicida OT-1                | NIFPSIDTSCVATSVRCISHDAHSRFCGLENLGLDMQKLSHRV    |
|     |          | 161323076 gb  | EDP94418.1     | Redoxin                                                        | Kordia algicida OT-1                |                                                |
| 203 | 2.09E-13 | 153950948 ref | YP_001398294.1 | thiol peroxidase                                               | Campylobacter jejuni subsp. doylei  | KVSLKGGKTLVSPSLDTPVCATEARNGAEVAMGRFCLEGLLARA   |
|     |          | 152938394 gb  | ABS43135.1     | thiol peroxidase                                               | Campylobacter jejuni subsp. doylei  |                                                |
| 204 | 7.44E-21 | 94499155 ref  | ZP_01305693.1  | Peroxiredoxin                                                  | Oceanobacter sp. RED65              | NIFPSVDPTTCATSVRCVSADAMNRFCEGLENVGDLTGLLSRA    |
|     |          | 94428787 gb   | EAT13759.1     | Peroxiredoxin                                                  | Oceanobacter sp. RED65              |                                                |
| 206 | 9.61E-13 | 57240637 ref  | ZP_00366586.1  | thiol peroxidase                                               | Campylobacter lari RM2100           | AGVELELTMPSLDTPVCSSKQAKIISIMDAMDRFCGVDFAGLLARA |
|     |          | 57018978 gb   | EAL55751.1     | thiol peroxidase                                               | Campylobacter lari RM2100           |                                                |
| 207 | 8.58E-19 | 123501795 ref | XP_001328156.1 | thiol peroxidase, putative                                     | Trichomonas vaginalis G3            | PVTPEELVNIFFSMDTGVCAASVRAISKDAQTRFCMNGLLARA    |
|     |          | 123501820 ref | XP_001328164.1 | thiol peroxidase, putative                                     | Trichomonas vaginalis G3            |                                                |
|     |          | 121911095 gb  | EAY15933.1     | thiol peroxidase, putative                                     | Trichomonas vaginalis G3            |                                                |
|     |          | 121911103 gb  | EAY15941.1     | thiol peroxidase, putative                                     | Trichomonas vaginalis G3            |                                                |
| 208 | 0        | 15801846 ref  | NP_287864.1    | thiol peroxidase                                               | Escherichia coli O157:H7 EDL933     | DVTNIFPSIDTGVCAASVRCISADAGSRFCGLENNV/LKGLAARA  |
|     |          | 15831157 ref  | NP_309930.1    | thiol peroxidase                                               | Escherichia coli O157:H7 str. Sakai |                                                |
|     |          | 16129285 ref  | NP_415840.1    | lipid hydroperoxide peroxidase                                 | Escherichia coli K12                |                                                |
|     |          | 24112719 ref  | NP_707229.1    | thiol peroxidase                                               | Shigella flexneri 2a str. 301       |                                                |
|     |          | 26247660 ref  | NP_753700.1    | thiol peroxidase                                               | Escherichia coli CF T073            |                                                |
|     |          | 30062842 ref  | NP_837013.1    | thiol peroxidase                                               | Shigella flexneri 2a str. 2457T     |                                                |
|     |          | 75212762 ref  | ZP_00712762.1  | COG2077: Peroxiredoxin                                         | Escherichia coli B171               |                                                |
|     |          | 75231878 ref  | ZP_00718219.1  | COG2077: Peroxiredoxin                                         | Escherichia coli B7A                |                                                |
|     |          | 7524124 ref   | ZP_00725918.1  | COG2077: Peroxiredoxin                                         | Escherichia coli F11                |                                                |
|     |          | 75259436 ref  | ZP_00730755.1  | COG2077: Peroxiredoxin                                         | Escherichia coli E22                |                                                |
|     |          | 75515056 ref  | ZP_00737260.1  | COG2077: Peroxiredoxin                                         | Escherichia coli 53638              |                                                |
|     |          | 82776688 ref  | YP_403037.1    | thiol peroxidase                                               | Shigella dysenteriae Sd197          |                                                |
|     |          | 83669452 ref  | ZP_00920905.1  | COG2077: Peroxiredoxin                                         | Shigella dysenteriae 1012           |                                                |
|     |          | 83587465 ref  | ZP_00926093.1  | COG2077: Peroxiredoxin                                         | Escherichia coli 101-1              |                                                |
|     |          | 89108171 ref  | AP_001951.1    | lipid hydroperoxide peroxidase                                 | Escherichia coli W3110              |                                                |
|     |          | 91210618 ref  | YP_540604.1    | thiol peroxidase                                               | Escherichia coli UT189              |                                                |
|     |          | 110641559 ref | YP_669289.1    | thiol peroxidase                                               | Escherichia coli 536                |                                                |
|     |          | 110805323 ref | YP_688843.1    | thiol peroxidase                                               | Shigella flexneri 5 str. 8401       |                                                |
|     |          | 117623577 ref | YP_852490.1    | thiol peroxidase                                               | Escherichia coli APEC O1            |                                                |
|     |          | 124527921 ref | ZP_01699310.1  | Redoxin domain protein                                         | Escherichia coli B                  |                                                |
|     |          | 157160835 ref | YP_001458153.1 | thiol peroxidase                                               | Escherichia coli HS                 |                                                |

|     |          |               |                |  |                                                                |                                     |
|-----|----------|---------------|----------------|--|----------------------------------------------------------------|-------------------------------------|
|     |          |               |                |  | TPX_ECOLI_Thiol peroxidase (Scavengase P20)                    | Escherichia coli K12                |
|     |          | 67473489 sp   | POA862         |  | TPX_ECOL6_Thiol peroxidase (Scavengase P20)                    | Escherichia coli strain O6          |
|     |          | 67473492 sp   | POA863         |  | TPX_ECO57_Thiol peroxidase (Scavengase P20)                    | Escherichia coli O157:H7            |
|     |          | 67473493 sp   | POA864         |  | TPX_SHIFL_Thiol peroxidase (Scavengase P20)                    | Shigella flexneri                   |
|     |          | 67473494 sp   | POA865         |  | TPX_SHIDY_Thiol peroxidase (Scavengase P20)                    | Shigella dysenteriae                |
|     |          | 67473497 sp   | POA866         |  | AF15317_31 thiol peroxidase                                    | Shigella dysenteriae                |
|     |          | 6759976 gb    | AAF28134.1     |  | AE005374_1 thiol peroxidase                                    | Escherichia coli O157:H7 EDL933     |
|     |          | 12515442 gb   | AA656478.1     |  | AE016760_121 Thiol peroxidase                                  | Escherichia coli CF1073             |
|     |          | 26108062 gb   | AAN80262.1     |  | lipid hydroperoxide peroxidase                                 | Escherichia coli K12                |
|     |          | 1787584 gb    | AAC74406.1     |  | scavengase p20                                                 | Escherichia coli                    |
|     |          | 1931625 gb    | AA45284.1      |  | thiol peroxidase                                               | Escherichia coli O157:H7 str. Sakai |
|     |          | 13361368 dbj  | BAB35326.1     |  | thiol peroxidase                                               | Shigella flexneri 2a str. 301       |
|     |          | 24051640 gb   | AAN42936.1     |  | thiol peroxidase                                               | Shigella flexneri 2a str. 2457T     |
|     |          | 30041090 gb   | AAP16820.1     |  | thiol peroxidase                                               | Shigella dysenteriae Sd197          |
|     |          | 81240636 gb   | ABB61546.1     |  | thiol peroxidase                                               | Escherichia coli W3110              |
|     |          | 85674905 dbj  | BAA14906.2     |  | lipid hydroperoxide peroxidase                                 | Escherichia coli UT189              |
|     |          | 91072192 gb   | ABE07073.1     |  | thiol peroxidase                                               | Escherichia coli 536                |
|     |          | 110343151 gb  | ABG69388.1     |  | thiol peroxidase                                               | Shigella flexneri 5 str. 8401       |
|     |          | 110814871 gb  | ABF03538.1     |  | thiol peroxidase                                               | Escherichia coli APEC O1            |
|     |          | 115512701 gb  | ABJ00776.1     |  | thiol peroxidase                                               | Escherichia coli C str. ATCC 8739   |
|     |          | 124501086 gb  | EAY48552.1     |  | Redoxin domain protein                                         | Escherichia coli HS                 |
|     |          | 157066515 gb  | ABV05770.1     |  | thiol peroxidase                                               |                                     |
|     |          |               |                |  |                                                                |                                     |
| 209 | 1.11E-16 | 81096557 ref  | ZP_00874897.1  |  | Alkyl hydroperoxide reductase/ Thiol specific antioxidant/ Maf | Streptococcus suis 89/1591          |
|     |          | 80977379 gb   | EAP40922.1     |  | Alkyl hydroperoxide reductase/ Thiol specific antioxidant/ Maf | Streptococcus suis 89/1591          |
|     |          |               |                |  |                                                                |                                     |
| 210 | 9.24E-13 | 90580443 ref  | ZP_01236249.1  |  | thiol peroxidase                                               | Vibrio angustum S14                 |
|     |          | 90438352 gb   | EAS63537.1     |  | thiol peroxidase                                               | Vibrio angustum S14                 |
|     |          |               |                |  |                                                                |                                     |
| 211 | 5.21E-21 | 28869939 ref  | NP_792558.1    |  | thiol peroxidase                                               | Pseudomonas syringae pv. tomato     |
|     |          | 28853184 gb   | AAO56253.1     |  | thiol peroxidase                                               | Pseudomonas syringae pv. tomato     |
|     |          |               |                |  |                                                                |                                     |
|     |          |               |                |  |                                                                |                                     |
| 212 | 7.11E-16 | 160694801 gb  | EDP84809.1     |  | thiol peroxidase                                               | Burkholderia mallei ATCC 10399      |
|     |          |               |                |  |                                                                |                                     |
| 213 | 0        | 16765025 ref  | NP_460640.1    |  | thiol peroxidase                                               | Salmonella typhimurium LT2          |
|     |          | 62180245 ref  | YP_216662.1    |  | thiol peroxidase                                               | Salmonella enterica subsp. enterica |
|     |          | 161613842 ref | YP_001587807.1 |  | hypothetical protein SPAB_01577                                | Salmonella enterica subsp. enterica |
|     |          | 24212521 gb   | Q8ZP65         |  | TPX_SALTY_Probable thiol peroxidase                            | Salmonella typhimurium LT1          |
|     |          | 16420209 gb   | AAL20599.1     |  | thiol peroxidase                                               | Salmonella typhimurium LT2          |
|     |          | 62127678 gb   | AA65581.1      |  | thiol peroxidase                                               | Salmonella enterica subsp. enterica |
|     |          | 161363206 gb  | ABX66974.1     |  | hypothetical protein SPAB_01577                                | Salmonella enterica subsp. enterica |
|     |          |               |                |  |                                                                |                                     |
| 214 | 0        | 146307455 ref | YP_001187920.1 |  | Redoxin domain protein                                         | Pseudomonas mendocina ymp           |
|     |          | 145575656 gb  | ABP85188.1     |  | thiol peroxidase (atypical 2-Cys peroxiredoxin)                | Pseudomonas mendocina ymp           |
|     |          |               |                |  |                                                                |                                     |
| 215 | 5.18E-23 | 23014942 ref  | ZP_00054735.1  |  | COG2077: Peroxiredoxin                                         | Magnetospirillum magnetotacticum    |
|     |          |               |                |  |                                                                |                                     |
| 216 | 0        | 118619311 ref | YP_906643.1    |  | thiol peroxidase                                               | Mycobacterium ulcerans Agy99        |
|     |          | 118570421 gb  | ABL05172.1     |  | thiol peroxidase Tpx                                           | Mycobacterium ulcerans Agy99        |
|     |          |               |                |  |                                                                |                                     |
| 217 | 0        | 78188602 ref  | YP_378940.1    |  | thiol peroxidase                                               | Chlorobium chlorochromatii CaD3     |
|     |          | 78170801 gb   | ABB27897.1     |  | thiol peroxidase (atypical 2-Cys peroxiredoxin)                | Chlorobium chlorochromatii CaD3     |
|     |          |               |                |  |                                                                |                                     |
| 218 | 1.84E-16 | 25011247 ref  | NP_735642.1    |  | thiol peroxidase                                               | Streptococcus agalactiae NEM316     |
|     |          | 60390727 sp   | Q8E536         |  | TPX_STRA3_Probable thiol peroxidase                            | Streptococcus agalactiae NEM316     |
|     |          | 23095671 emb  | CAD46857.1     |  | Unknown                                                        | Streptococcus agalactiae NEM316     |
|     |          |               |                |  |                                                                |                                     |
| 219 | 2.16E-16 | 52081440 ref  | YP_080231.1    |  | thiol peroxidase                                               | Bacillus licheniformis ATCC 14580   |
|     |          | 52004651 gb   | AAU24593.1     |  | thiol peroxidase                                               | Bacillus licheniformis ATCC 14580   |

|     |          |           |           |     |                               |                                                                                                                                  |                                                                                |                                                |
|-----|----------|-----------|-----------|-----|-------------------------------|----------------------------------------------------------------------------------------------------------------------------------|--------------------------------------------------------------------------------|------------------------------------------------|
| 220 | 4.35E-16 | 126439476 | 126213969 | ref | YP_001060480.1<br>ABN82475.1  | thiol peroxidase<br>thiol peroxidase                                                                                             | Burkholderia pseudomallei 668<br>Burkholderia pseudomallei 668                 | KVTNVPVSLDPTCAASTRVVSADAATRFYGVNVTLDGLAARA     |
| 221 | 0        | 126664498 | 126630824 | ref | ZP_01735482.1<br>EBA01438.1   | Alkyl hydroperoxide reductase/ Thiol specific antioxidant/ Maf<br>Alkyl hydroperoxide reductase/ Thiol specific antioxidant/ Maf | Marinobacter sp. ELB17<br>Marinobacter sp. ELB17                               | SIFPSIDTGVCAASTREKAADLVISADAFARFCGLDLAAGLCARA  |
| 222 | 0        | 77979524  |           | ref | ZP_00834942.1                 | COG2077: Peroxiredoxin                                                                                                           | Yersinia intermedia ATCC 29909                                                 | PVTNIFPSIDTGVCAASVRCISSDAQSRFCRGADFKLAGLTARA   |
| 223 | 1.58E-22 | 163765768 | 160353734 | ref | ZP_02172799.1<br>EDP80414.1   | Redoxin domain protein<br>Redoxin domain protein                                                                                 | Anaeromyxobacter sp. K<br>Anaeromyxobacter sp. K                               | VGAKAPDVTNIVPSLDTAVCATSTRVVSADAQKRFCFCLAGLTARA |
| 224 | 1.76E-18 | 49524076  |           | emb | CAG62939.1                    | thiol peroxidase                                                                                                                 | Burkholderia multivorans                                                       | NIVPSLDTPTCATSTRVVSADAASRFCEGLENVGVNDLNGLTARA  |
| 225 | 1.29E-13 | 158319724 | 158139923 | ref | YP_001512231.1<br>ABWV18235.1 | Redoxin domain protein<br>Redoxin domain protein                                                                                 | Alkaliphilus oremlandii OhnLAs<br>Alkaliphilus oremlandii OhnLAs               | LVTSVVPSLDTGVCELQITFEAAELGTISVDAQKRFCFCELLRSRG |
| 226 | 2.95E-17 | 75759970  | 74492528  | ref | ZP_00740038.1<br>EAO55676.1   | Thioredoxin peroxidase<br>Thioredoxin peroxidase                                                                                 | Bacillus thuringiensis serovar<br>Bacillus thuringiensis serovar               | SVVPSIDTGYCDAQTRTISADAKRWCVVTELRLRARAYVGEET    |
| 227 | 1.65E-18 | 56477081  | 56313124  | ref | YP_158670.1<br>CAI07769.1     | probable thiol peroxidase<br>probable thiol peroxidase                                                                           | Azoarcus sp. EbN1<br>Azoarcus sp. EbN1                                         | DIAEVTNIVPSLDTPTCATSTRVISGDAAKRFCGLDLKGLAARA   |
| 228 | 0        | 19552312  | 62389975  | ref | NP_600314.1<br>YP_225377.1    | peroxiredoxin<br>THIOL PEROXIDASE                                                                                                | Corynebacterium glutamicum ATCC<br>Corynebacterium glutamicum ATCC             | NIFPSVDTGYCATSVRASLENTCISKDALGRFCNVTLKGLLARS   |
| 229 | 1.49E-11 | 29142011  | 56413408  | ref | NP_805353.1<br>YP_150483.1    | putative thiol peroxidase<br>putative thiol peroxidase                                                                           | Salmonella enterica subsp. enterica<br>Salmonella enterica subsp. enterica     | LGQEHAKPGIAEGVIVVPSLDTPVCEWQVKVLSMDAQARFIVT    |
| 230 | 9.88E-13 | 118744934 | 118882132 | ref | ZP_01592919.1<br>EAV88546.1   | Redoxin<br>Redoxin                                                                                                               | Geobacter lovleyi SZ<br>Geobacter lovleyi SZ                                   | SAVPSLTPVCDTEIRTISLDAQKRWCELLLSRCDVDAEGIEVT    |
| 231 | 1.75E-21 | 85059476  | 84779996  | ref | YP_455178.1<br>BAE74773.1     | thiol peroxidase<br>thiol peroxidase                                                                                             | Sodalis glossinidius str. 'morsitans'<br>Sodalis glossinidius str. 'morsitans' | DVTNIFPSVDTGTCATSVRCISADAKRFCFEGLEKVMKGLAARA   |
| 232 | 8.59E-14 | 163763528 | 160355848 | ref | ZP_02170589.1<br>EDP82500.1   | Redoxin domain protein<br>Redoxin domain protein                                                                                 | Bacillus selenitireducens MLS10<br>Bacillus selenitireducens MLS10             | KGTEVKSVVPSIDTGVCDCEQTRTISVDAGKRWCVGDELLRLARS  |
| 233 | 0        | 145634838 | 145268004 | ref | ZP_01790546.1<br>EDK08000.1   | hypothetical protein CGSHIAA_04518<br>hypothetical protein CGSHIAA_04518                                                         | Haemophilus influenzae P1HAA<br>Haemophilus influenzae P1HAA                   | NIFPSIDTGVCATSVRCISADAKRFCFEGLEKVMKGLAARA      |
| 234 | 2.75E-13 | 150017535 | 149904000 | ref | YP_001309789.1<br>ABR34833.1  | Redoxin domain protein<br>Redoxin domain protein                                                                                 | Clostridium beijerinckii NCIMB 8052<br>Clostridium beijerinckii NCIMB 8052     | QGVNEVTVTVSPVPSIDTPTVCDLEVRVVSMDAQGRWCELGLLTR  |
| 235 | 1.42E-18 | 148993779 | 147927735 | ref | ZP_01823206.1<br>EDK78759.1   | thiol peroxidase<br>thiol peroxidase                                                                                             | Streptococcus pneumoniae SP9<br>Streptococcus pneumoniae SP9                   | VSFTGKSVVPSIDTGVCDCEQTRTISVDAGKRWCVGDEWHLAR    |
| 236 | 5.99E-20 | 154148995 | 153805004 | ref | YP_001407293.1<br>ABS52011.1  | thiol peroxidase (Scavengase P20)<br>thiol peroxidase (Scavengase P20)                                                           | Campylobacter hominis ATCC BAA-<br>Campylobacter hominis ATCC BAA-             | TVTATVPSLDTGVCAATEIRVISMDAMGRFCFEGLEKVMKGLAARA |
| 237 | 2.20E-15 | 163691639 | 162436386 | ref | ZP_02115827.1<br>EDQ46958.1   | Redoxin domain protein<br>Redoxin domain protein                                                                                 | Elusimicrobium minutum Pei191<br>Elusimicrobium minutum Pei191                 | KGAEKLTLSVPSIDTPTVCTIETRTVSKDAQKRWTEIYILSRA    |
| 238 | 1.42E-11 | 157165156 | 112800320 | ref | YP_001467743.1<br>EAT197664.1 | thiol peroxidase (Scavengase P20)<br>thiol peroxidase (Scavengase P20)                                                           | Campylobacter concisus 13826<br>Campylobacter concisus 13826                   | GGNNGVCLPSLDTGVCAAEARIISNDAMGRFCLKGLARAIEVT    |



|     |          |           |     |  |  |  |  |  |                                                               |                                    |  |                                               |
|-----|----------|-----------|-----|--|--|--|--|--|---------------------------------------------------------------|------------------------------------|--|-----------------------------------------------|
|     |          |           |     |  |  |  |  |  | Alkyl hydroperoxide reductase/ Thiol specific antioxidant/ Ma | Prosthecochloris aestuarii DSM 271 |  |                                               |
|     |          |           |     |  |  |  |  |  |                                                               |                                    |  |                                               |
| 249 | 0        | 68550608  | ref |  |  |  |  |  | Alkyl hydroperoxide reductase/ Thiol specific antioxidant/ Ma | Pelodictyon phaeoclastriforme BU-  |  | ITFKGTNIFPSLDTPVCAASVRCISADAHKRFCVGLKLLSRA    |
|     |          |           |     |  |  |  |  |  | Alkyl hydroperoxide reductase/ Thiol specific antioxidant/ Ma | Pelodictyon phaeoclastriforme BU-  |  |                                               |
|     |          |           |     |  |  |  |  |  |                                                               |                                    |  |                                               |
| 250 | 0        | 15609069  | ref |  |  |  |  |  | thiol peroxidase                                              | Mycobacterium tuberculosis H37Rv   |  | NIFPSVDTPVCAVSRVCSKDAQKRFCGTEGVNTMAGLLARY     |
|     |          |           |     |  |  |  |  |  | thiol peroxidase                                              | Mycobacterium tuberculosis         |  |                                               |
|     |          |           |     |  |  |  |  |  | thiol peroxidase                                              | Mycobacterium bovis AF2122/97      |  |                                               |
|     |          |           |     |  |  |  |  |  | COG2077: Peroxiredoxin                                        | Mycobacterium tuberculosis C       |  |                                               |
|     |          |           |     |  |  |  |  |  | thiol peroxidase                                              | Mycobacterium bovis BCG str.       |  |                                               |
|     |          |           |     |  |  |  |  |  | thiol peroxidase                                              | Mycobacterium tuberculosis H37Ra   |  |                                               |
|     |          |           |     |  |  |  |  |  | thiol peroxidase                                              | Mycobacterium tuberculosis F11     |  |                                               |
|     |          |           |     |  |  |  |  |  | TPX_MYCBO Probable thiol peroxidase                           | Mycobacterium bovis                |  |                                               |
|     |          |           |     |  |  |  |  |  | TPX_MYCTU Probable thiol peroxidase                           | Mycobacterium tuberculosis         |  |                                               |
|     |          |           |     |  |  |  |  |  | PROBABLE THIOL PEROXIDASE TPX                                 | Mycobacterium tuberculosis H37Rv   |  |                                               |
|     |          |           |     |  |  |  |  |  | thiol peroxidase                                              | Mycobacterium tuberculosis         |  |                                               |
|     |          |           |     |  |  |  |  |  | tpx protein                                                   | Mycobacterium tuberculosis         |  |                                               |
|     |          |           |     |  |  |  |  |  | PROBABLE THIOL PEROXIDASE TPX                                 | Mycobacterium bovis AF2122/97      |  |                                               |
|     |          |           |     |  |  |  |  |  | Probable thiol peroxidase tpx                                 | Mycobacterium bovis BCG str.       |  |                                               |
|     |          |           |     |  |  |  |  |  | thiol peroxidase tpx                                          | Mycobacterium tuberculosis C       |  |                                               |
|     |          |           |     |  |  |  |  |  | thiol peroxidase tpx                                          | Mycobacterium tuberculosis str.    |  |                                               |
|     |          |           |     |  |  |  |  |  | thiol peroxidase                                              | Mycobacterium tuberculosis H37Ra   |  |                                               |
|     |          |           |     |  |  |  |  |  | thiol peroxidase                                              | Mycobacterium tuberculosis F11     |  |                                               |
|     |          |           |     |  |  |  |  |  |                                                               |                                    |  |                                               |
| 251 | 0        | 156933829 | ref |  |  |  |  |  | hypothetical protein ESA_01655                                | Enterobacter sakazakii ATCC BAA-   |  | NIFPSIDTGVCAASVRTGMENITCVSADAQRSFCVGLKGLTARA  |
|     |          |           |     |  |  |  |  |  | hypothetical protein ESA_01655                                | Enterobacter sakazakii ATCC BAA-   |  |                                               |
|     |          |           |     |  |  |  |  |  |                                                               |                                    |  |                                               |
| 252 | 6.99E-19 | 162454000 | ref |  |  |  |  |  | thiol peroxidase                                              | Sorangium cellulosum 'So ce 56'    |  | NIFPSVDTPVCAVSRVRAEKLVNTNISADAHTRFCVGLLARS    |
|     |          |           |     |  |  |  |  |  | thiol peroxidase                                              | Sorangium cellulosum 'So ce 56'    |  |                                               |
|     |          |           |     |  |  |  |  |  |                                                               |                                    |  |                                               |
| 253 | 1.27E-22 | 71906172  | ref |  |  |  |  |  | Alkyl hydroperoxide reductase/ Thiol specific antioxidant/ Ma | Dechloromonas aromatica RCB        |  | NIFPSIDTPTCATSVRAKANGLCISADAQAQRFCDLGLDGLTARA |
|     |          |           |     |  |  |  |  |  | thiol peroxidase (atypical 2-Cys peroxiredoxin)               | Dechloromonas aromatica RCB        |  |                                               |
|     |          |           |     |  |  |  |  |  |                                                               |                                    |  |                                               |
| 254 | 1.31E-14 | 82751301  | ref |  |  |  |  |  | probable thiol peroxidase                                     | Staphylococcus aureus RF122        |  | VTLADSVPSIDTGVCDQQTREGVLTACKRWCGLDLRLIARA     |
|     |          |           |     |  |  |  |  |  | probable thiol peroxidase                                     | Staphylococcus aureus RF122        |  |                                               |
|     |          |           |     |  |  |  |  |  |                                                               |                                    |  |                                               |
| 255 | 0        | 83753706  | pdb |  |  |  |  |  | A Chain A. Structure Of Mycobacterial Thiol Peroxidase Tpx    | Mycobacterium Tuberculosis         |  | NIFPSVDTPVSATSVRCSVSKDAQKRFCGTEGVNTMAGLLARA   |
|     |          |           |     |  |  |  |  |  | B Chain B. Structure Of Mycobacterial Thiol Peroxidase Tpx    | Mycobacterium Tuberculosis         |  |                                               |
|     |          |           |     |  |  |  |  |  |                                                               |                                    |  |                                               |
| 256 | 9.58E-14 | 57237624  | ref |  |  |  |  |  | thiol peroxidase                                              | Campylobacter jejuni RM1221        |  | EVGADGKTLVPSLDTPVCAVTEARNGAEVAMGRFCEGLLARA    |
|     |          |           |     |  |  |  |  |  | thiol peroxidase                                              | Campylobacter jejuni subsp. jejuni |  |                                               |
|     |          |           |     |  |  |  |  |  | thiol peroxidase                                              | Campylobacter jejuni subsp. jejuni |  |                                               |
|     |          |           |     |  |  |  |  |  | probable thiol peroxidase                                     | Campylobacter jejuni subsp. jejuni |  |                                               |
|     |          |           |     |  |  |  |  |  | thiol peroxidase                                              | Campylobacter jejuni subsp. jejuni |  |                                               |
|     |          |           |     |  |  |  |  |  | thiol peroxidase                                              | Campylobacter jejuni subsp. jejuni |  |                                               |
|     |          |           |     |  |  |  |  |  | thiol peroxidase                                              | Campylobacter jejuni RM1221        |  |                                               |
|     |          |           |     |  |  |  |  |  | thiol peroxidase                                              | Campylobacter jejuni subsp. jejuni |  |                                               |
|     |          |           |     |  |  |  |  |  | thiol peroxidase                                              | Campylobacter jejuni subsp. jejuni |  |                                               |
|     |          |           |     |  |  |  |  |  | probable thiol peroxidase                                     | Campylobacter jejuni subsp. jejuni |  |                                               |
|     |          |           |     |  |  |  |  |  | thiol peroxidase                                              | Campylobacter jejuni subsp. jejuni |  |                                               |
| 257 | 6.31E-18 | 118044952 | ref |  |  |  |  |  | Redoxin                                                       | Burkholderia phytofirmans PsJN     |  | NIVPSLDTPTCATSTRVWSGDAASRFCEGIENVGVDLTGLTARA  |
|     |          |           |     |  |  |  |  |  | Redoxin                                                       | Burkholderia phytofirmans PsJN     |  |                                               |
|     |          |           |     |  |  |  |  |  |                                                               |                                    |  |                                               |
| 258 | 8.01E-09 | 124266797 | ref |  |  |  |  |  | thiol peroxidase                                              | Methylobium petroleiphilium PM1    |  | VGLEQFIVPSLEIMPTCAASLRSHDGVLDLKGLTARAALTRSC   |
|     |          |           |     |  |  |  |  |  | thiol peroxidase (atypical 2-Cys peroxiredoxin)               | Methylobium petroleiphilium PM1    |  |                                               |
|     |          |           |     |  |  |  |  |  |                                                               |                                    |  |                                               |
| 259 | 0        | 119356776 | ref |  |  |  |  |  | Redoxin domain protein                                        | Chlorobium phaeobacteroides DSM    |  | ADFEGRNIFPSLDTPVCAASVRCISADAHSRFCVGLKLLCRA    |
|     |          |           |     |  |  |  |  |  | thiol peroxidase (atypical 2-Cys peroxiredoxin)               | Chlorobium phaeobacteroides DSM    |  |                                               |

|     |          |                                                                                                               |                                                                                                           |                                                                                                                                                                                                                                                              |                                                                                                                                                                                                                                                                                                                                                            |                                                |
|-----|----------|---------------------------------------------------------------------------------------------------------------|-----------------------------------------------------------------------------------------------------------|--------------------------------------------------------------------------------------------------------------------------------------------------------------------------------------------------------------------------------------------------------------|------------------------------------------------------------------------------------------------------------------------------------------------------------------------------------------------------------------------------------------------------------------------------------------------------------------------------------------------------------|------------------------------------------------|
| 260 | 0        | 34496325 ref<br>34102178 gb                                                                                   | NP_900540.1<br>AAQ58545.1                                                                                 | thiol peroxidase<br>thiol peroxidase                                                                                                                                                                                                                         | Chromobacterium violaceum ATCC<br>Chromobacterium violaceum ATCC                                                                                                                                                                                                                                                                                           | TVTNIFPSVDTPTCATSVRCVSADAAQKRFCEGIENVLGLTARA   |
| 261 | 7.23E-19 | 149187579 ref<br>148838459 gb                                                                                 | ZP_01865876.1<br>EDL55399.1                                                                               | thiol peroxidase<br>thiol peroxidase                                                                                                                                                                                                                         | Vibrio shionii AK1<br>Vibrio shionii AK1                                                                                                                                                                                                                                                                                                                   | KVTNIFPSIDTPVCANSVRAAGRFCCEGIENVLRGLTARACVSKD  |
| 262 | 2.78E-19 | 126664023 ref<br>126623972 gb                                                                                 | ZP_01735017.1<br>EAZ94666.1                                                                               | Peroxiredoxin<br>Peroxiredoxin                                                                                                                                                                                                                               | Flavobacteria bacterium BAL38<br>Flavobacteria bacterium BAL38                                                                                                                                                                                                                                                                                             | NIFPSIDTGTCAASVRCISRDAQKRFCEGIENVGLELGLHSRV    |
| 263 | 3.09E-17 | 161525952 ref<br>160343381 gb                                                                                 | YP_001580964.1<br>ABX16467.1                                                                              | Redoxin domain protein<br>Redoxin domain protein                                                                                                                                                                                                             | Burkholderia multivorans ATCC<br>Burkholderia multivorans ATCC                                                                                                                                                                                                                                                                                             | NIVPSLDTPTCATSTRVVSADAAATRFCEGIENVGVDLNGLTARA  |
| 264 | 3.30E-17 | 30264713 ref<br>4778339 ref<br>49187531 ref<br>52140868 ref<br>65322010 ref<br>118479780 ref<br>165869582 ref | NP_847090.1<br>YP_021534.2<br>YP_030784.1<br>YP_085961.1<br>ZP_00394969.1<br>YP_896931.1<br>ZP_02214240.1 | thiol peroxidase<br>thiol peroxidase<br>thiol peroxidase<br>thiol peroxidase<br>thiol peroxidase<br>thiol peroxidase<br>thiol peroxidase                                                                                                                     | Bacillus anthracis str. Ames<br>Bacillus anthracis str. Ames<br>Bacillus anthracis str. Steine<br>Bacillus cereus E331<br>Bacillus anthracis str. A2012<br>Bacillus thuringiensis str. Al Hakam<br>Bacillus anthracis str. A0488<br>Bacillus anthracis str. Ames<br>Bacillus anthracis str. Ames<br>Bacillus anthracis str. Steine<br>Bacillus cereus E331 | SVVPSIDTGVCDAAQIRTSADAAQKRWCVVTELRARAYVSEGT    |
| 265 | 3.14E-17 | 78065160 ref<br>77965905 gb                                                                                   | YP_367929.1<br>ABB07285.1                                                                                 | Alkyl hydroperoxide reductase/Thiol specific antioxidant/ Malonaldehyde peroxidase (atypical 2-Cys peroxidase)                                                                                                                                               | Burkholderia sp. 383<br>Burkholderia sp. 383                                                                                                                                                                                                                                                                                                               | VGAQGANIVPSLDPTCATSTRVVSADAAATRFCEGIENVLGLTARA |
| 266 | 5.53E-20 | 42521937 ref<br>39574467 emb                                                                                  | NP_967317.1<br>CAE77971.1                                                                                 | thiol peroxidase<br>thiol peroxidase                                                                                                                                                                                                                         | Bdellovibrio bacteriovorus HD100<br>Bdellovibrio bacteriovorus HD100                                                                                                                                                                                                                                                                                       | NIFPSVDTGTCAASVRNISADAAQARFCIVDLAGLLSRAEAALAS  |
| 267 | 5.08E-22 | 160286238 pdb<br>160286239 pdb<br>160286240 pdb<br>160286241 pdb                                              | 2YZH<br>2YZH<br>2YZH<br>2YZH                                                                              | A Chain A, Crystal Structure Of Peroxiredoxin-Like Protein F<br>B Chain B, Crystal Structure Of Peroxiredoxin-Like Protein F<br>C Chain C, Crystal Structure Of Peroxiredoxin-Like Protein F<br>D Chain D, Crystal Structure Of Peroxiredoxin-Like Protein F | Aquifex Aeolicus<br>Aquifex Aeolicus<br>Aquifex Aeolicus<br>Aquifex Aeolicus                                                                                                                                                                                                                                                                               | VVTTVPSLDTPVCETETKAGMEGVVVSMDAQKRFCKLKGILARA   |
| 268 | 3.97E-15 | 89100074 ref<br>89085164 gb                                                                                   | ZP_01172943.1<br>EAR64296.1                                                                               | thioredoxin peroxidase<br>thioredoxin peroxidase                                                                                                                                                                                                             | Bacillus sp. NRRL B-14911<br>Bacillus sp. NRRL B-14911                                                                                                                                                                                                                                                                                                     | LGNEVKEVTSVVPISDITGVCDAAQTRTVSVDAQKRWCELRLLARZ |
| 269 | 7.81E-14 | 71281238 ref<br>71146978 gb                                                                                   | YP_270247.1<br>AAZ27451.1                                                                                 | antioxidant, AhpC/TSA family<br>antioxidant, AhpC/TSA family                                                                                                                                                                                                 | Cowellia psychrethraea 34H<br>Cowellia psychrethraea 34H                                                                                                                                                                                                                                                                                                   | YVTSVPSLDTGVCSIQTKEEAAKL TISNDAQKRFCDMGLLTRA   |
| 270 | 0        | 50120917 ref<br>49611443 emb                                                                                  | YP_050084.1<br>CAG74891.1                                                                                 | thiol peroxidase<br>thiol peroxidase                                                                                                                                                                                                                         | Erwinia carotovora subsp.<br>Erwinia carotovora subsp.                                                                                                                                                                                                                                                                                                     | NIFPSIDTGVCAASVRCISSDAQSRFCCEGIENNVGVALKGLTARA |
| 271 | 3.88E-16 | 25027697 ref<br>30316167 sp<br>23492979 dbj                                                                   | NP_737751.1<br>Q8FQH8<br>BAC17951.1                                                                       | putative thioredoxin peroxidase<br>TPX_COREF Probable thiol peroxidase<br>putative thioredoxin peroxidase                                                                                                                                                    | Corynebacterium efficiens YS-314<br>Corynebacterium efficiens YS-313<br>Corynebacterium efficiens YS-314                                                                                                                                                                                                                                                   | NIFPSVDTGLCAESVRFNAEAACYSKDALGRFCGLDLKGLLARS   |
| 272 | 4.36E-20 | 157738810 ref<br>157693664 gb                                                                                 | YP_001489493.1<br>ABV68824.1                                                                              | thiol peroxidase<br>thiol peroxidase                                                                                                                                                                                                                         | Arcobacter butzleri RM4018<br>Arcobacter butzleri RM4018                                                                                                                                                                                                                                                                                                   | EVTVVVPSLDTGVCACTETRVVSMDDMKRRCCEGIENLLAGLTARA |
| 273 | 3.34E-21 | 67918177 ref<br>67784233 gb                                                                                   | ZP_00511778.1<br>EAM4361.1                                                                                | Alkyl hydroperoxide reductase/ Thiol specific antioxidant/ Malonaldehyde peroxidase                                                                                                                                                                          | Chlorobium limicola DSM 245<br>Chlorobium limicola DSM 245                                                                                                                                                                                                                                                                                                 | TVTNIFPSLDTAVCAASVRCISADAHKRFCEGIENNVKGLLARA   |
| 274 | 0        | 27802131 gb                                                                                                   | AAO21122.1                                                                                                | putative thiol peroxidase                                                                                                                                                                                                                                    | Mycobacterium avium                                                                                                                                                                                                                                                                                                                                        | NIFPSIDTPVCATSVRAGAGATNYSKDAQARFCGVITMAGLLARA  |

|     |          |           |     |                                                            |                                                                                                                                |                                                                                                                                  |                                                  |
|-----|----------|-----------|-----|------------------------------------------------------------|--------------------------------------------------------------------------------------------------------------------------------|----------------------------------------------------------------------------------------------------------------------------------|--------------------------------------------------|
| 275 | 0        | 157370856 | ref | YP_001478845.1<br>ABV4:17.17.1                             | Redoxin domain protein<br>Redoxin domain protein                                                                               | Serratia proteamaculans 568<br>Serratia proteamaculans 568                                                                       | NIIPSIDTGVCATSVRGLDCISADAGSRFCRGAEFKLAGLTARA     |
| 276 | 2.60E-13 | 150391465 | ref | YP_001321514.1<br>ABR4:9855.1                              | Redoxin domain protein<br>Redoxin domain protein                                                                               | Alkaliphilus metalliredigens QYMF<br>Alkaliphilus metalliredigens QYMF                                                           | VVTIGNEIKSVVPSLDTGVGEFQTTTVSVDAQKRFCELRLLSRG     |
| 277 | 0        | 83312975  | ref | YP_4232339.1<br>BAE5:2680.1                                | Peroxioredoxin<br>Peroxioredoxin                                                                                               | Magnetospirillum magneticum AMB-<br>Magnetospirillum magneticum AMB-                                                             | GLDNIFPSIDTPVCAASVRCVSADAHKRFCEGLERYLAGLLARA     |
| 278 | 6.23E-16 | 33358145  | pdb | 1PSQ<br>1PSQ                                               | A Chain A, Structure Of A Probable Thiol Peroxidase From<br>B Chain B, Structure Of A Probable Thiol Peroxidase From           | Streptococcus Pneumoniae<br>Streptococcus Pneumoniae                                                                             | VSFTGKSVVPSIDTIGICSTQTRGLDVTVSDLAQKRWCEWHLLARA   |
| 279 | 7.75E-15 | 56421322  | ref | YP_148640.1<br>BAD7:7072.1                                 | thiol peroxidase (superoxide-inducible protein 8)<br>thiol peroxidase (superoxide-inducible protein 8)                         | Geobacillus kaustophilus HTA426<br>Geobacillus kaustophilus HTA426                                                               | EVTSVVPVSLDTGVCDQAQTRTISVDAQKRWCAAGIENVELRLLARA  |
| 280 | 6.28E-12 | 118581306 | ref | YP_902556.1<br>ABL00499.1                                  | Redoxin domain protein<br>thiol peroxidase (atypical 2-Cys peroxioredoxin)                                                     | Pelobacter propionicus DSM 2379<br>Pelobacter propionicus DSM 2379                                                               | TVTCTVPSLDTPVGDTEITREAAANKTISQDAGRWCELMILLARA    |
| 281 | 1.97E-12 | 46579639  | ref | YP_010447.1<br>YP_967276.1<br>AAS9:5706.1<br>120563105     | thiol peroxidase<br>Redoxin domain protein<br>thiol peroxidase<br>thiol peroxidase (atypical 2-Cys peroxioredoxin)             | Desulfovibrio vulgaris subsp.<br>Desulfovibrio vulgaris subsp.<br>Desulfovibrio vulgaris subsp.<br>Desulfovibrio vulgaris subsp. | GLTSAVPVSLDTGVCDMETREANLGTVSCDAQARWCELRLLTR      |
| 282 | 3.44E-16 | 84360702  | ref | ZP_00985397.1<br>EAY6:9790.1                               | COG2077: Peroxioredoxin<br>Peroxioredoxin                                                                                      | Burkholderia dolosa AUO158<br>Burkholderia dolosa AUO158                                                                         | ASFAGKNIIVPSLDTPTTCATSTRVVSQDAAATRFQGVDLINGLTARA |
| 283 | 3.44E-21 | 38233948  | ref | NP_939715.1<br>CAE4:9890.1                                 | thiol peroxidase<br>thiol peroxidase                                                                                           | Corynebacterium diptheriae NCTC<br>Corynebacterium diptheriae                                                                    | ESAVEITNIFPSIDTGVCAQSVRCASADAHRSFCGLDKLGLLARA    |
| 284 | 3.15E-15 | 90021199  | ref | YP_527026.1<br>ABD8:0814.1                                 | thiol peroxidase<br>thiol peroxidase (atypical 2-Cys peroxioredoxin)                                                           | Saccharophagus degradans 2-40<br>Saccharophagus degradans 2-40                                                                   | TVTINIFVSDTGTTCATSVRASLENTCVSLDALGRFCLAGLYSRS    |
| 285 | 3.85E-16 | 148878467 | ref | ZP_01814941.1<br>EDK2:7654.1                               | Alkyl hydroperoxide reductase/ Thiol specific antioxidant/ Ma<br>Alkyl hydroperoxide reductase/ Thiol specific antioxidant/ Ma | Vibrionales bacterium SWAT-3<br>Vibrionales bacterium SWAT-3                                                                     | NIIPSIDTATCATSVRCISADAAAGRFCEGIEVLAGLTTRAVVT     |
| 286 | 2.98E-13 | 125717135 | ref | YP_001034268.1<br>ABN4:3718.1                              | thiol peroxidase<br>Thiol peroxidase, putative                                                                                 | Streptococcus sanguinis SK36<br>Streptococcus sanguinis SK36                                                                     | SIIPSIDTGVCSQTQRTVSVDAQGWCEGIENAEWHLLARATVT      |
| 287 | 2.57E-12 | 156741029 | ref | YP_001431158.1<br>ABU5:7140.1                              | Redoxin domain protein<br>Redoxin domain protein                                                                               | Roseiflexus castenholzii DSM 13941<br>Roseiflexus castenholzii DSM 13941                                                         | SVIIPSIDTGVCSKQTRTVSADAAQGRWCVGDGAAFGTDAALAAL    |
| 288 | 0        | 34557922  | ref | NP_907737.1<br>CAE1:0637.1                                 | PUTATIVE THIOL PEROXIDASE-SCAVENGASE P20 OXID<br>PUTATIVE THIOL PEROXIDASE-SCAVENGASE P20 OXID                                 | Wolinella succinogenes DSM 1740<br>Wolinella succinogenes                                                                        | GGTNVVPVSLDTGVCATQTRVVSMDAQQGRFCEGIENLAGVTAR     |
| 289 | 2.20E-15 | 24379369  | ref | NP_721324.1<br>Q8DUK3<br>30916154                          | thiol peroxidase<br>TPX_STRMU Probable thiol peroxidase<br>AE014933_4 thiol peroxidase                                         | Streptococcus mutans UA159<br>Streptococcus mutans UA159                                                                         | TTFNGNGDTSVVPVPSIDTGVCDQAQTRTVSVDAQARWCEHLGLGR   |
| 290 | 0        | 68249348  | ref | YP_248460.1<br>ZP_01787839.1<br>AAX8:7800.1<br>EDJ9:3541.1 | probable thiol peroxidase<br>probable thiol peroxidase<br>probable thiol peroxidase<br>probable thiol peroxidase               | Haemophilus influenzae 86-028NP<br>Haemophilus influenzae 3655<br>Haemophilus influenzae 86-028NP<br>Haemophilus influenzae 3655 | NIIPSIDTGVCATSVRCISADAAQARFCEGIENAGVLDLAGLTSRA   |
| 291 | 2.03E-10 | 401552    | sp  | P31307<br>AAA5:3078.1                                      | TPX_STRPA Probable thiol peroxidase<br>ORF3; codes for 20 kD protein                                                           | Streptococcus parasanguinis<br>Streptococcus parasanguinis                                                                       | PVTSIIPSIDTIGICSMQTRTVSVDAQGWKWCCEGLDIAEWHLLARA  |
| 292 | 9.54E-19 | 119896397 | ref | YP_931610.1                                                | probable thiol peroxidase                                                                                                      | Azoarcus sp. BHT2                                                                                                                | ESAPAFGLDNVPSLDTPTTCATSTRVSGDAAAKRFCLAGLTARA     |



|     |          |           |     |                |                                                               |  |                                        |                                                |
|-----|----------|-----------|-----|----------------|---------------------------------------------------------------|--|----------------------------------------|------------------------------------------------|
|     |          | 119668810 | emb | CAL92723.1     | probable thiol peroxidase                                     |  | Azoarcus sp. BH72                      |                                                |
| 293 | 8.37E-20 | 160882643 | ref | ZP_02063646.1  | hypothetical protein BACOVA_00596                             |  | Bacteroides ovatus ATCC 8483           | NIFPSLDTSVCATSVRAISKDAHGHRFCEGIENVGVRLAGLLARA  |
|     |          | 156111958 | gb  | EDO13703.1     | hypothetical protein BACOVA_00596                             |  | Bacteroides ovatus ATCC 8483           |                                                |
| 294 | 3.68E-16 | 134294688 | ref | YP_001118423.1 | Redoxin domain protein                                        |  | Burkholderia vietnamiensis G4          | ASFAGKNIVPSLDTPTCATSTRVVSQDAATRFQGVDLNGLTARA   |
|     |          | 134137845 | gb  | ABO63588.1     | thiol peroxidase (atypical 2-Cys peroxiredoxin)               |  | Burkholderia vietnamiensis G4          |                                                |
| 295 | 7.38E-19 | 120556703 | ref | YP_961054.1    | Redoxin domain protein                                        |  | Marinobacter aquaeolicus VT8           | NVTSGLLEEVNIPSIDTGVCAASTRYVISADAASRFCLAGLCARA  |
|     |          | 120326552 | gb  | ABM20867.1     | thiol peroxidase (atypical 2-Cys peroxiredoxin)               |  | Marinobacter aquaeolicus VT8           |                                                |
| 296 | 2.65E-15 | 16080001  | ref | NP_390827.1    | thiol peroxidase                                              |  | Bacillus subtilis subsp. subtilis str. | KVTSVIPSIDTGVCDAGTRTISADAQAARWCELLRLARSEAAKAL  |
|     |          | 6094509   | sp  | P80864         | TPX_BACSU Probable thiol peroxidase (Superoxide-inducible)    |  | Bacillus subtilis                      |                                                |
|     |          | 2293238   | gb  | AA00316.1      | YigI                                                          |  | Bacillus subtilis                      |                                                |
|     |          | 2635433   | emb | CAB14927.1     | thiol peroxidase                                              |  | Bacillus subtilis subsp. subtilis str. |                                                |
| 297 | 1.77E-15 | 121997983 | ref | YP_001002770.1 | Redoxin domain protein                                        |  | Halorhodospira halophila SL1           | NIVPSLDTVCGASAKGVTTYSADQAQRFCMEGLCARAEIAEEP    |
|     |          | 121589388 | gb  | ABM61968.1     | thiol peroxidase (atypical 2-Cys peroxiredoxin)               |  | Halorhodospira halophila SL1           |                                                |
| 298 | 1.72E-21 | 66045717  | ref | YP_235558.1    | Alkyl hydroperoxide reductase/ Thiol specific antioxidant/ Ma |  | Pseudomonas syringae pv. syringae      | QVTNIFVSDTPTCATSVRCISADAQAARFCEGIENVLAGLTARA   |
|     |          | 63256424  | gb  | AAV37520.1     | Alkyl hydroperoxide reductase/ Thiol specific antioxidant/ Ma |  | Pseudomonas syringae pv. syringae      |                                                |
| 299 | 0        | 21958817  | gb  | AAIM8556.1     | AE013802_1 thiol peroxidase                                   |  | Yersinia pestis KIM                    | SSFAGKNIFPSIDTGVCAASVRCISSDAQSRFCGVVALAGLTARA  |
|     |          | 45436785  | gb  | AAS62338.1     | thiol peroxidase                                              |  | Yersinia pestis biovar Microtus str.   |                                                |
| 300 | 0        | 121527938 | ref | ZP_01660552.1  | putative thiol peroxidase-scavengase P20 oxidoreductase p     |  | Ralstonia pickettii 12J                | VGADLKNIVPSLDTVPCATSTRISADAAGRFQGVDLAGVTARA    |
|     |          | 121304708 | gb  | EAX45670.1     | putative thiol peroxidase-scavengase P20 oxidoreductase p     |  | Ralstonia pickettii 12J                |                                                |
| 301 | 1.23E-12 | 145628366 | ref | ZP_01784167.1  | probable thiol peroxidase                                     |  | Haemophilus influenzae 22.1-21         | MTVTLAGNEVGLVNDNIFPSIDTGVCATSVHISADLPAQARFL    |
|     |          | 144980141 | gb  | EDJ89800.1     | probable thiol peroxidase                                     |  | Haemophilus influenzae 22.1-21         |                                                |
| 302 | 0        | 17547509  | ref | NP_520911.1    | PROBABLE THIOL PEROXIDASE-SCAVENGASE P20 OXI                  |  | Ralstonia solanacearum GMI1000         | GGALPSNIVPSLDTVPCATSTRISADAAGRFQGVDLAGLTARA    |
|     |          | 24212517  | sp  | Q8XVP0         | TPX_RALSO Probable thiol peroxidase                           |  |                                        |                                                |
|     |          | 17429812  | emb | CAD16497.1     | probable thiol peroxidase oxidoreductase protein              |  | Ralstonia solanacearum                 |                                                |
| 303 | 8.18E-13 | 89072146  | ref | ZP_01158742.1  | thiol peroxidase                                              |  | Photobacterium sp. SKA34               | QVTNIFPSIDTVPVICALGVKCSADATGRFCEFAEAYLRDLATRA  |
|     |          | 89052247  | gb  | EAR57698.1     | thiol peroxidase                                              |  | Photobacterium sp. SKA34               |                                                |
| 304 | 1.56E-13 | 145619142 | ref | ZP_01775195.1  | Redoxin domain protein                                        |  | Geobacter bemiensis Bem                | SAVPSLDTVPGDTEITRTISADAQAQRKRCVVTTELKLSRSEALRA |
|     |          | 144944635 | gb  | EDJ79707.1     | Redoxin domain protein                                        |  | Geobacter bemiensis Bem                |                                                |
| 305 | 8.50E-14 | 15792117  | ref | NP_281940.1    | probable thiol peroxidase                                     |  | Campylobacter jejuni subsp. jejuni     | EVGADGKTLVSPSLDTPVCA TEARNGAEVIAMGRFQLEGLLARA  |
|     |          | 86150249  | ref | ZP_01068476.1  | thiol peroxidase                                              |  | Campylobacter jejuni subsp. jejuni     |                                                |
|     |          | 86152164  | ref | ZP_01070376.1  | thiol peroxidase                                              |  | Campylobacter jejuni subsp. jejuni     |                                                |
|     |          | 86597562  | ref | ZP_01100796.1  | thiol peroxidase                                              |  | Campylobacter jejuni subsp. jejuni     |                                                |
|     |          | 11134997  | sp  | Q9PPE0         | TPX_CAMJE Probable thiol peroxidase                           |  | Campylobacter jejuni                   |                                                |
|     |          | 85839365  | gb  | EAQ56627.1     | thiol peroxidase                                              |  | Campylobacter jejuni subsp. jejuni     |                                                |
|     |          | 85840949  | gb  | EAQ58199.1     | thiol peroxidase                                              |  | Campylobacter jejuni subsp. jejuni     |                                                |
|     |          | 88190154  | gb  | EAQ94129.1     | thiol peroxidase                                              |  | Campylobacter jejuni subsp. jejuni     |                                                |
|     |          | 112360113 | emb | CAL34907.1     | thiol peroxidase                                              |  | Campylobacter jejuni subsp. jejuni     |                                                |
| 306 | 0        | 146311803 | ref | YP_001176877.1 | thiol peroxidase                                              |  | Enterobacter sp. 638                   | LVAKDDVTNIFPSIDTGVCAASVRSISADLPAQSRFCLKGLTARA  |
|     |          | 145318679 | gb  | ABP60826.1     | thiol peroxidase (atypical 2-Cys peroxiredoxin)               |  | Enterobacter sp. 638                   |                                                |
| 307 | 5.45E-10 | 154174915 | ref | YP_001409037.1 | thiol peroxidase (Scavengase P20)                             |  | Campylobacter curvus 525.92            | VVGKDGVVAVPVS LDTDVCAMEAKAMGRFCEGIENVLTGLTAR   |
|     |          | 112804065 | gb  | EALU01409.1    | thiol peroxidase (Scavengase P20)                             |  | Campylobacter curvus 525.92            |                                                |
| 308 | 0        | 110735219 | gb  | ABG89180.1     | thiol peroxidase Tpx                                          |  | Mannheimia haemolytica                 | NIFPSIDTGVCATSVRCISADAQAARFCEGIENVAGVDLAGLTSRS |

|  |              |            |                        |                               |
|--|--------------|------------|------------------------|-------------------------------|
|  | 153095022.gp | EDN75577.1 | thioredoxin peroxidase | Mannheimia haemolytica PHL213 |
|--|--------------|------------|------------------------|-------------------------------|

| Hit# | p-value  | gi number | db  | protein accession | Name                                                        | Species                                                | Active Site Signature                        |
|------|----------|-----------|-----|-------------------|-------------------------------------------------------------|--------------------------------------------------------|----------------------------------------------|
| 1    | 1.62E-12 | 50954926  | ref | YP_062214.1       | AhpC/TSA family protein                                     | <i>Leifsonia xylii</i> subsp. <i>xylii</i> str. CTCB07 | VFFPLAFSGTGCQGLCVSDTLRAWEEHIEGYVFLKGFANRA    |
|      |          | 50951408  | gb  | AA189109.1        | AhpC/TSA family protein                                     | <i>Leifsonia xylii</i> subsp. <i>xylii</i> str. CTCB07 |                                              |
| 3    | 3.16E-18 | 134098120 | ref | YP_001103781.1    | member of AhpC/TSA family                                   | <i>Saccharopolyspora erythraea</i> NRRL 2338           | VFYPPAFSGICQGLCVSDALKAWAEQEGYVFNAGWANRG      |
|      |          | 134910743 | emb | CAM100886.1       | member of AhpC/TSA family                                   | <i>Saccharopolyspora erythraea</i> NRRL 2338           |                                              |
| 5    | 4.96E-13 | 21220837  | ref | NP_626616.1       | thiol-specific antioxidant protein                          | <i>Streptomyces coelicolor</i> A3(2)                   | IQVGLFYPPFAFTGVCTGELCVSNLRLVFAEQEGLKGC AVR   |
|      |          | 8246810   | emb | CAB92845.1        | putative thiol-specific antioxidant protein                 | <i>Streptomyces coelicolor</i> A3(2)                   |                                              |
| 6    | 0        | 111018206 | ref | YP_7011178.1      | probable thioredoxin-dependent thiol peroxidase             | <i>Rhodococcus</i> sp. RHA1                            | VFYPLAFTGTCQGEICLSVGTGTHKIWSAEQGYVFNLFANRG   |
|      |          | 110817736 | gb  | ABG93020.1        | probable thioredoxin-dependent thiol peroxidase             | <i>Rhodococcus</i> sp. RHA1                            |                                              |
| 7    | 5.76E-20 | 118473680 | ref | YP_888595.1       | alkyl hydroperoxide reductase/Thiol specific antioxidant    | <i>Mycobacterium smegmatis</i> str. MC2 155            | VFFPLAFTGVCEGELGVSVGTGTHKIWSIESGTFVFNAGYPNRG |
|      |          | 118174967 | gb  | ABK75863.1        | alkyl hydroperoxide reductase/Thiol specific antioxidant    | <i>Mycobacterium smegmatis</i> str. MC2 155            |                                              |
| 9    | 0        | 111224431 | ref | YP_715225.1       | Peroxioredoxin                                              | <i>Frankia alni</i> ACN14a                             | LFYPLTFTGVCGELCVSDAHKVAEQQGYIFNRSISVRG       |
|      |          | 111151963 | emb | CAJ63685.1        | Peroxioredoxin                                              | <i>Frankia alni</i> ACN14a                             |                                              |
| 10   | 0        | 86741739  | ref | YP_482139.1       | alkyl hydroperoxide reductase/Thiol specific antioxidant    | <i>Frankia</i> sp. Ccl3                                | LFYPLTFTGVCGELCVSDAHKVAEQQGYVFNRSISLRG       |
|      |          | 86568601  | gb  | ABD12410.1        | alkyl hydroperoxide reductase/Thiol specific antioxidant    | <i>Frankia</i> sp. Ccl3                                |                                              |
| 11   | 0        | 15609375  | ref | NP_216754.1       | Probable peroxiredoxin AhpE                                 | <i>Mycobacterium tuberculosis</i> H37Rv                | VFFPLAFTGICQGEICLISVGTGTHKIWATQSGVFNAGIANRG  |
|      |          | 15841731  | ref | NP_336768.1       | AhpC/TSA family protein                                     | <i>Mycobacterium tuberculosis</i> CDC1551              |                                              |
|      |          | 31793418  | ref | NP_855911.1       | peroxiredoxin AhpE                                          | <i>Mycobacterium bovis</i> AF212297                    |                                              |
|      |          | 81253788  | ref | ZP_00878321.1     | COG1225: Peroxioredoxin                                     | <i>Mycobacterium tuberculosis</i> C                    |                                              |
|      |          | 121638120 | ref | YP_978344.1       | peroxiredoxin AhpE                                          | <i>Mycobacterium bovis</i> BCG str. Pasteur            |                                              |
|      |          | 148662059 | ref | YP_001283582.1    | AhpC/TSA family protein                                     | <i>Mycobacterium tuberculosis</i> H37Ra                |                                              |
|      |          | 148823446 | ref | YP_001288200.1    | peroxiredoxin AhpE                                          | <i>Mycobacterium tuberculosis</i> F11                  |                                              |
|      |          | 54040483  | sp  | P65689            | Y2262_MYCBO Putative peroxiredoxin Mb2262c (Thior)          | <i>Mycobacterium bovis</i>                             |                                              |
|      |          | 54042941  | sp  | P65688            | Y2238_MYCTU Putative peroxiredoxin Rv2238c(MT229)           | <i>Mycobacterium tuberculosis</i>                      |                                              |
|      |          | 61680453  | pdb | 1XXU              | A Chain A. Crystal Structure Of Ahpe From <i>Mycobacter</i> | <i>Mycobacterium tuberculosis</i>                      |                                              |
|      |          | 61680460  | pdb | 1XXU              | B Chain B. Crystal Structure Of Ahpe From <i>Mycobacter</i> | <i>Mycobacterium tuberculosis</i>                      |                                              |
|      |          | 61680461  | pdb | 1XXU              | C Chain C. Crystal Structure Of Ahpe From <i>Mycobacter</i> | <i>Mycobacterium tuberculosis</i>                      |                                              |
|      |          | 61680462  | pdb | 1XXU              | D Chain D. Crystal Structure Of Ahpe From <i>Mycobacter</i> | <i>Mycobacterium tuberculosis</i>                      |                                              |
|      |          | 1261910   | emb | 1261910           | Probable peroxiredoxin AhpE                                 | <i>Mycobacterium tuberculosis</i> H37Rv                |                                              |
|      |          | 13881989  | gb  | AAK46582.1        | AhpC/TSA family protein                                     | <i>Mycobacterium tuberculosis</i> CDC1551              |                                              |
|      |          | 31619010  | emb | CAD97115.1        | peroxiredoxin AhpE                                          | <i>Mycobacterium bovis</i> AF212297                    |                                              |
|      |          | 121493768 | emb | CAL72243.1        | peroxiredoxin AhpE                                          | <i>Mycobacterium bovis</i> BCG str. Pasteur            |                                              |
|      |          | 124601450 | gb  | EAY60460.1        | peroxiredoxin AhpE                                          | <i>Mycobacterium tuberculosis</i> C                    |                                              |
|      |          | 134150547 | gb  | EBA42592.1        | peroxiredoxin AhpE                                          | <i>Mycobacterium tuberculosis</i> str. Haarlem         |                                              |
|      |          | 148506211 | gb  | ABQ74020.1        | AhpC/TSA family protein                                     | <i>Mycobacterium tuberculosis</i> H37Ra                |                                              |
|      |          | 148721973 | gb  | ABR06598.1        | peroxiredoxin AhpE                                          | <i>Mycobacterium tuberculosis</i> F11                  |                                              |
| 12   | 2.08E-15 | 72162363  | ref | YP_290020.1       | putative thiol-specific antioxidant protein                 | <i>Thermobifida fusca</i> YX                           | VFYPLAFSGICDKELRISVDAHRVWADREGVWFDKGVALRG    |
|      |          | 71916095  | gb  | AAZ55997.1        | putative thiol-specific antioxidant protein                 | <i>Thermobifida fusca</i> YX                           |                                              |
| 13   | 0        | 118617010 | ref | YP_905342.1       | peroxiredoxin AhpE                                          | <i>Mycobacterium ulcerans</i> Agy99                    | VFFPLAFTGICQGEICLISVGTGTHKIWATQSGVFNAGISNRG  |
|      |          | 118569120 | gb  | ABL03871.1        | peroxiredoxin AhpE                                          | <i>Mycobacterium ulcerans</i> Agy99                    |                                              |
| 14   | 2.53E-12 | 119963106 | ref | YP_948159.1       | putative bacterioferritin comigratory protein (thioredoxin) | <i>Arthrobacter aureus</i> ens TC1                     | TEVQQAPASGLVFFFPFAFSGICTGELCVSDSGMALRGVWN    |
|      |          | 119949965 | gb  | ABM08876.1        | putative bacterioferritin comigratory protein (thioredoxin) | <i>Arthrobacter aureus</i> ens TC1                     |                                              |
| 20   | 0        | 108800325 | ref | YP_640522.1       | Redoxin                                                     | <i>Mycobacterium</i> sp. MCS                           | VFFPLAFTGICQGEICLISVGTGTHKIWATQSGVFNAGIANRG  |
|      |          | 119869453 | ref | YP_939405.1       | Redoxin domain protein                                      | <i>Mycobacterium</i> sp. KMS                           |                                              |
|      |          | 126435948 | ref | YP_001071639.1    | alkyl hydroperoxide reductase/Thiol specific antioxidant    | <i>Mycobacterium</i> sp. JLS                           |                                              |
|      |          | 108770744 | gb  | ABG09486.1        | Redoxin                                                     | <i>Mycobacterium</i> sp. MCS                           |                                              |
|      |          | 119695542 | gb  | ABL92615.1        | Redoxin domain protein                                      | <i>Mycobacterium</i> sp. KMS                           |                                              |
|      |          | 126235748 | gb  | ABN99148.1        | alkyl hydroperoxide reductase/Thiol specific antioxidant    | <i>Mycobacterium</i> sp. JLS                           |                                              |
| 21   | 0        | 159039144 | ref | YP_001538397.1    | alkyl hydroperoxide reductase/Thiol specific antioxidant    | <i>Salinispora arenicola</i> CNS-205                   | IEYGVFPLAFTGVCQGEICLCAHKWADREGVYFNAGIANRG    |
|      |          | 157917979 | gb  | ABV99406.1        | alkyl hydroperoxide reductase/Thiol specific antioxidant    | <i>Salinispora arenicola</i> CNS-205                   |                                              |
| 22   | 3.45E-14 | 148272804 | ref | YP_001222365.1    | putative thiol-specific antioxidant protein                 | <i>Clavibacter michiganensis</i> subsp.                | VFFPLAFSGTGMCMCISVDTLRAWAQQQGVFLKGFANRA      |
|      |          | 147830734 | emb | CAN01674.1        | putative thiol-specific antioxidant protein                 | <i>Clavibacter michiganensis</i> subsp.                |                                              |
| 23   | 0        | 41408089  | ref | NP_960925.1       | AhpE                                                        | <i>Mycobacterium avium</i> subsp.                      | VFFPLAFTGICQGEICLISVGTGTHKIWALESGVFNAGYSNRG  |
|      |          | 41396444  | gb  | AAS04308.1        | AhpE                                                        | <i>Mycobacterium avium</i> subsp.                      |                                              |
| 24   | 1.30E-10 | 84496763  | ref | ZP_0095617.1      | putative thiol-specific antioxidant protein                 | <i>Janibacter</i> sp. HTCC2649                         | VFYPWAFSGICTGELTSCDSLRAYADRDG VYFDAGVARRG    |
|      |          | 84383531  | gb  | EAP99412.1        | putative thiol-specific antioxidant protein                 | <i>Janibacter</i> sp. HTCC2649                         |                                              |
| 26   | 0        | 145223371 | ref | YP_001134049.1    | alkyl hydroperoxide reductase/Thiol specific antioxidant    | <i>Mycobacterium gilvum</i> PYR-GCK                    | VFFPLAFTGICQRELDISVGHVHWATQRYVFNAGYVNTGFSNRG |
|      |          | 145215857 | gb  | ABP45261.1        | alkyl hydroperoxide reductase/Thiol specific antioxidant    | <i>Mycobacterium gilvum</i> PYR-GCK                    |                                              |
| 27   | 0        | 54023578  | ref | YP_117820.1       | hypothetical protein nfa16100                               | <i>Nocardia farcinica</i> IFM 10152                    | VFYPLAFTGVCGELCVSIVGTGTHKWAEEQGYVFNAGSFGANRG |

|    |          |                              |                                                           |                                                           |                                     |                                              |
|----|----------|------------------------------|-----------------------------------------------------------|-----------------------------------------------------------|-------------------------------------|----------------------------------------------|
| 28 | 0        | 54015086 dbj BAD56456.1      | hypothetical protein                                      | alkyl hydroperoxide reductase/ Thiol specific antioxidant | <i>Nocardia farcinica</i> IFM 10152 | IDVGVFPLAFSGVCGGELCSHKIWANQEGYVFNNGGIANRG    |
|    |          | 145595882 ref YP_001160179.1 | alkyl hydroperoxide reductase/ Thiol specific antioxidant | <i>Salinispora tropica</i> CNB-440                        |                                     |                                              |
|    |          | 145305219 gb ABP55801.1      | alkyl hydroperoxide reductase/ Thiol specific antioxidant | <i>Salinispora tropica</i> CNB-440                        |                                     |                                              |
| 31 | 4.78E-13 | 29832345 ref NP_826979.1     | thiol-specific antioxidant protein                        | <i>Streptomyces avermitilis</i> MA-4680                   |                                     | IQVGLFYPFAFTGYCTGELCVSNTLLRVFAEQEGLKGCVRG    |
|    |          | 29609464 dbj BAC73514.1      | putative thiol-specific antioxidant protein               | <i>Streptomyces avermitilis</i> MA-4680                   |                                     | VFFPLAFTGICQQGELDISVGTTHRIWALESGFVFNAGYSNRG  |
| 32 | 0        | 118462931 ref YP_881408.1    | alkyl hydroperoxide reductase/ Thiol specific antioxidant | <i>Streptomyces avermitilis</i> MA-4680                   |                                     |                                              |
|    |          | 118164218 gb ABK65115.1      | alkyl hydroperoxide reductase/ Thiol specific antioxidant | <i>Mycobacterium avium</i> 104                            |                                     |                                              |
| 33 | 0        | 158313700 ref YP_001506208.1 | alkyl hydroperoxide reductase/ Thiol specific antioxidant | <i>Mycobacterium avium</i> 104                            |                                     | LFYPLTFTGVCQGGELCISVDAHKKVWADQQQGYVFNKGISLRG |
|    |          | 158109105 gb ABW11302.1      | alkyl hydroperoxide reductase/ Thiol specific antioxidant | <i>Frankia</i> sp. EAN1pec                                |                                     |                                              |
| 35 | 1.98E-26 | 120404708 ref YP_954537.1    | Redoxin domain protein                                    | <i>Frankia</i> sp. EAN1pec                                |                                     | VFFPLAFTGICQRELDISVGTTHKVMWATERGYVFNNSGFANRG |
|    |          | 119957526 gb ABM14531.1      | Redoxin domain protein                                    | <i>Mycobacterium vanbaalenii</i> PYR-1                    |                                     |                                              |
| 36 | 1.66E-10 | 116671008 ref YP_831941.1    | Redoxin domain protein                                    | <i>Mycobacterium vanbaalenii</i> PYR-1                    |                                     | VFYPPFAFTSGICTGELCLSVDPHGAVAAQYGVSGMAGRGVVN  |
|    |          | 116611117 gb ABK03841.1      | Redoxin domain protein                                    | <i>Arthrobacter</i> sp. FB24                              |                                     |                                              |
| 37 | 1.19E-21 | 61680453 pdb 1XVW            | A Chain A, Crystal Structure Of Ahpe                      | <i>Arthrobacter</i> sp. FB24                              |                                     | VFFPLAFTGIQGGELDQDISVGTTHKIWATQSGFVFNAGIANRG |
|    |          | 61680454 pdb 1XVW            | B Chain B, Crystal Structure Of Ahpe                      | <i>Mycobacterium Tuberculosis</i>                         |                                     |                                              |
